# Supplementary material for: Autism spectrum disorder trios from consanguineous populations are enriched for rare biallelic variants, identifying 32 new candidate genes
Source: bioRxiv or medRxiv preprint supplement (doi:10.1101/2021.12.24.21268340), 2024-10-08

Supplementary Materials:Supporting documentation for variants:

Table 1. Recessive

1. SMPA3: *MTHFR*

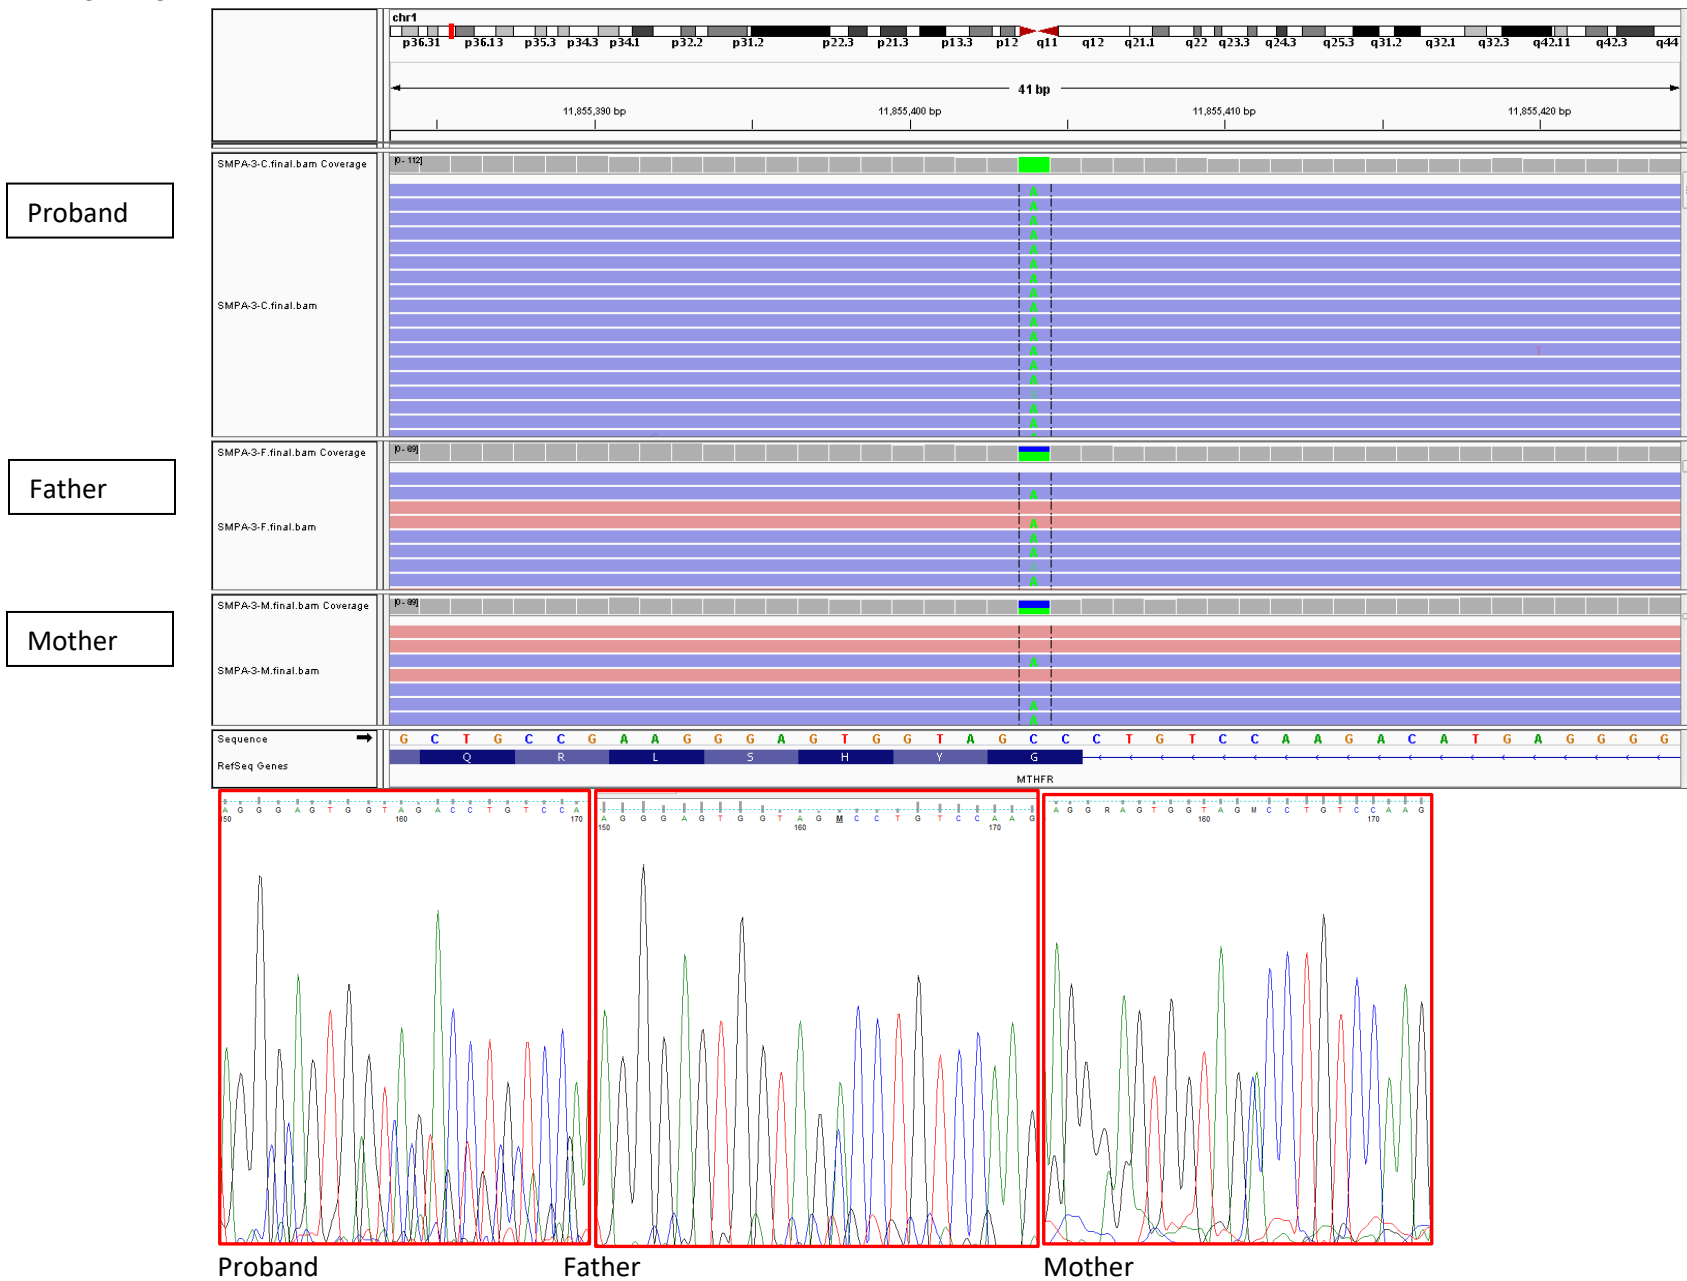

2. IABB16: *CLCA4*

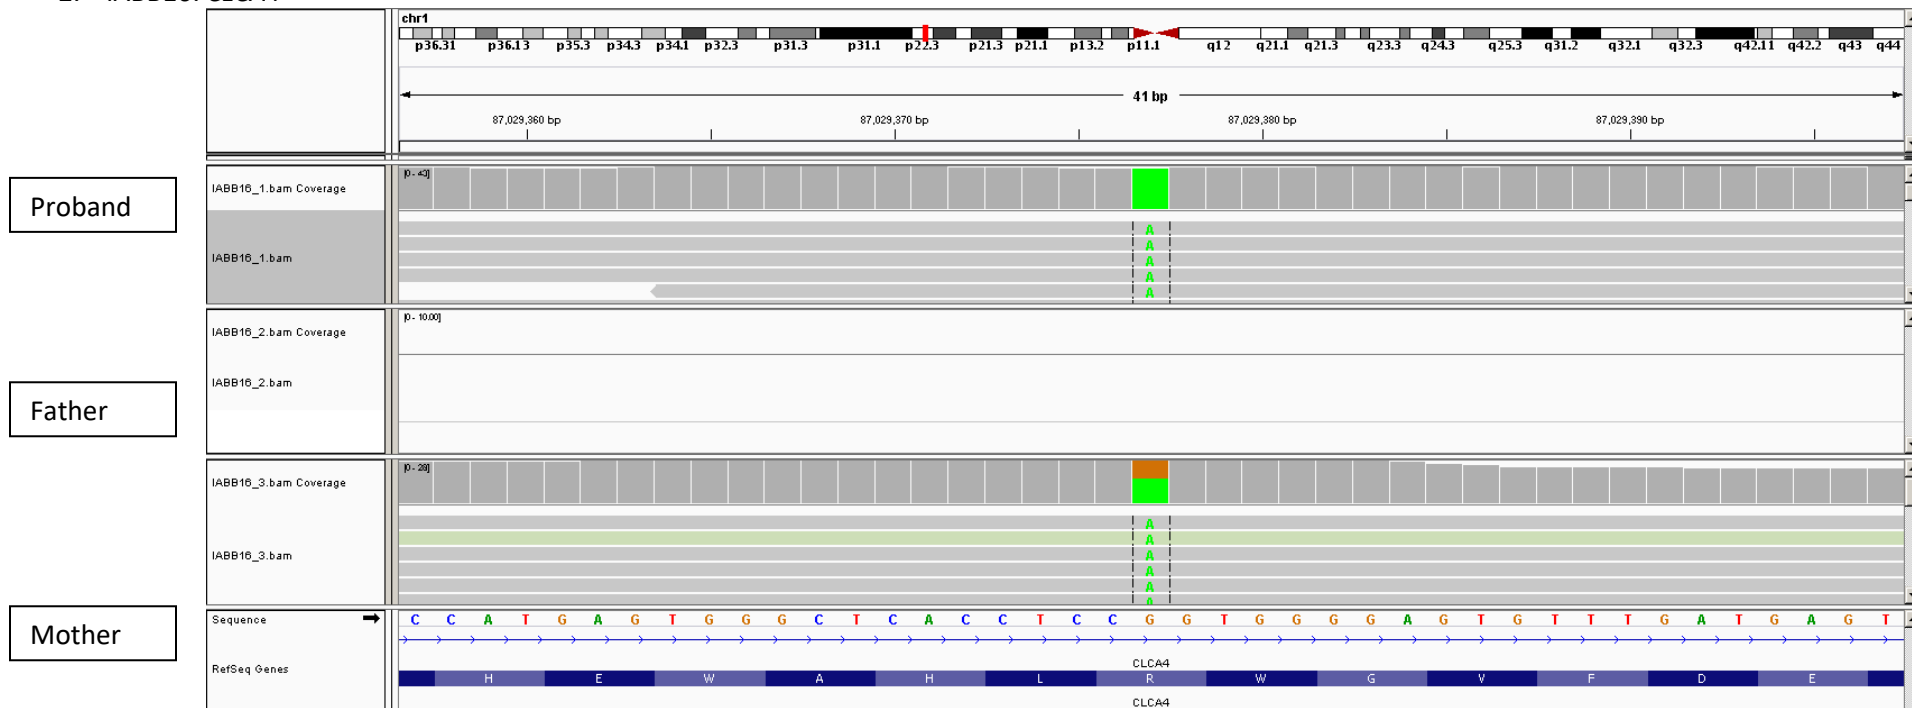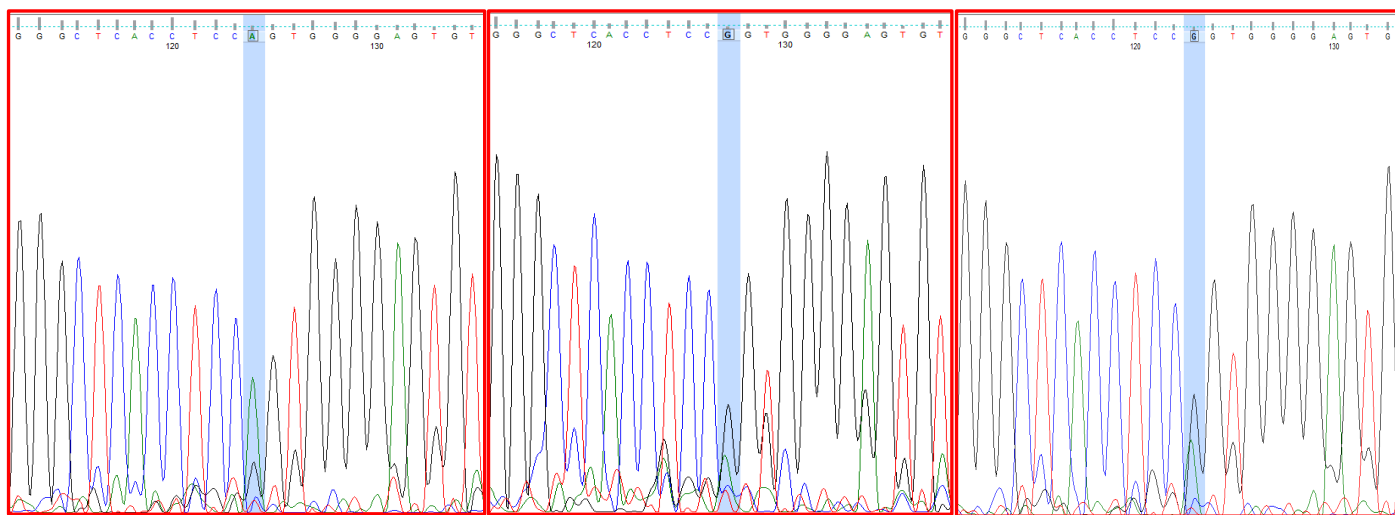

Proband

Father

Mother

### 3. SMPA4: *HRNR*

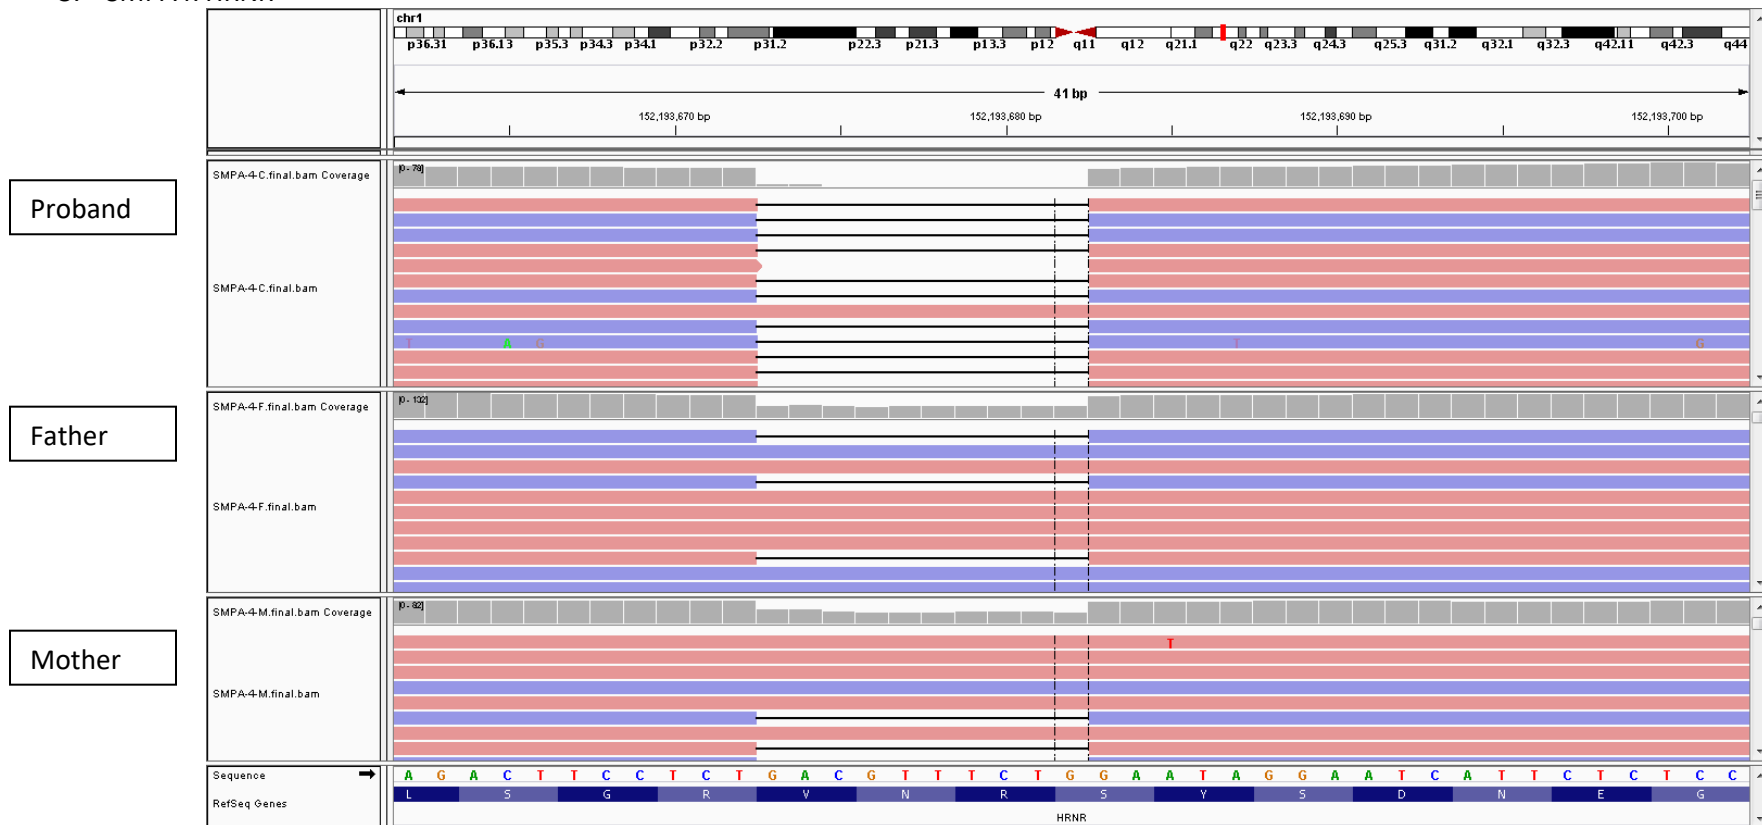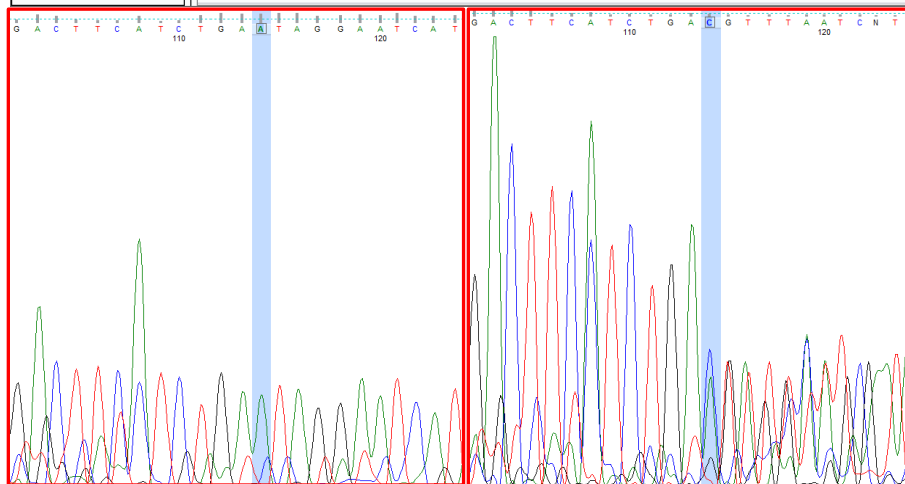

Proband

Mother

#### 4. SMPA76: ILDR2

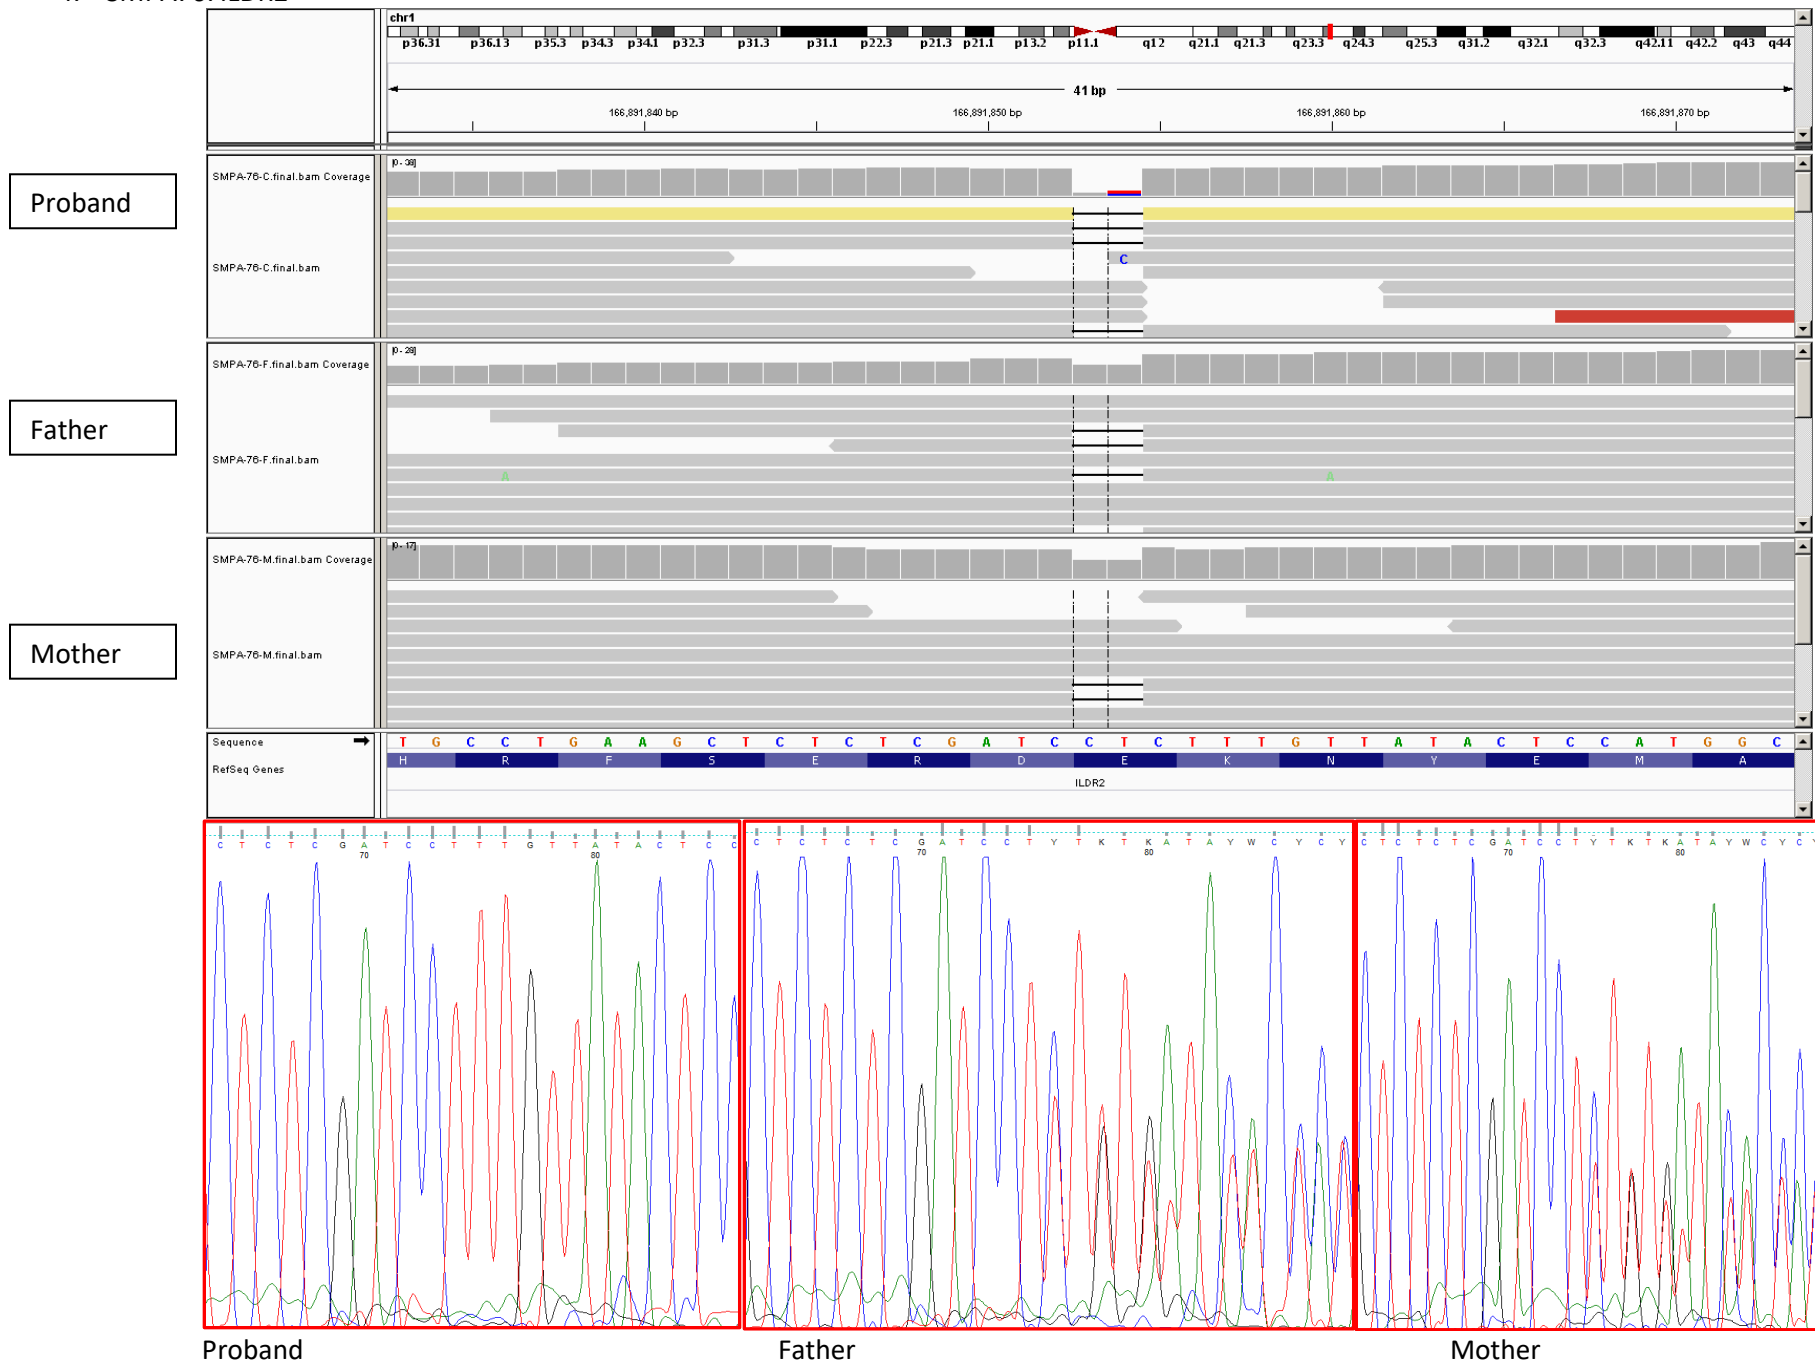

5. SMPA3: *RASAL2*

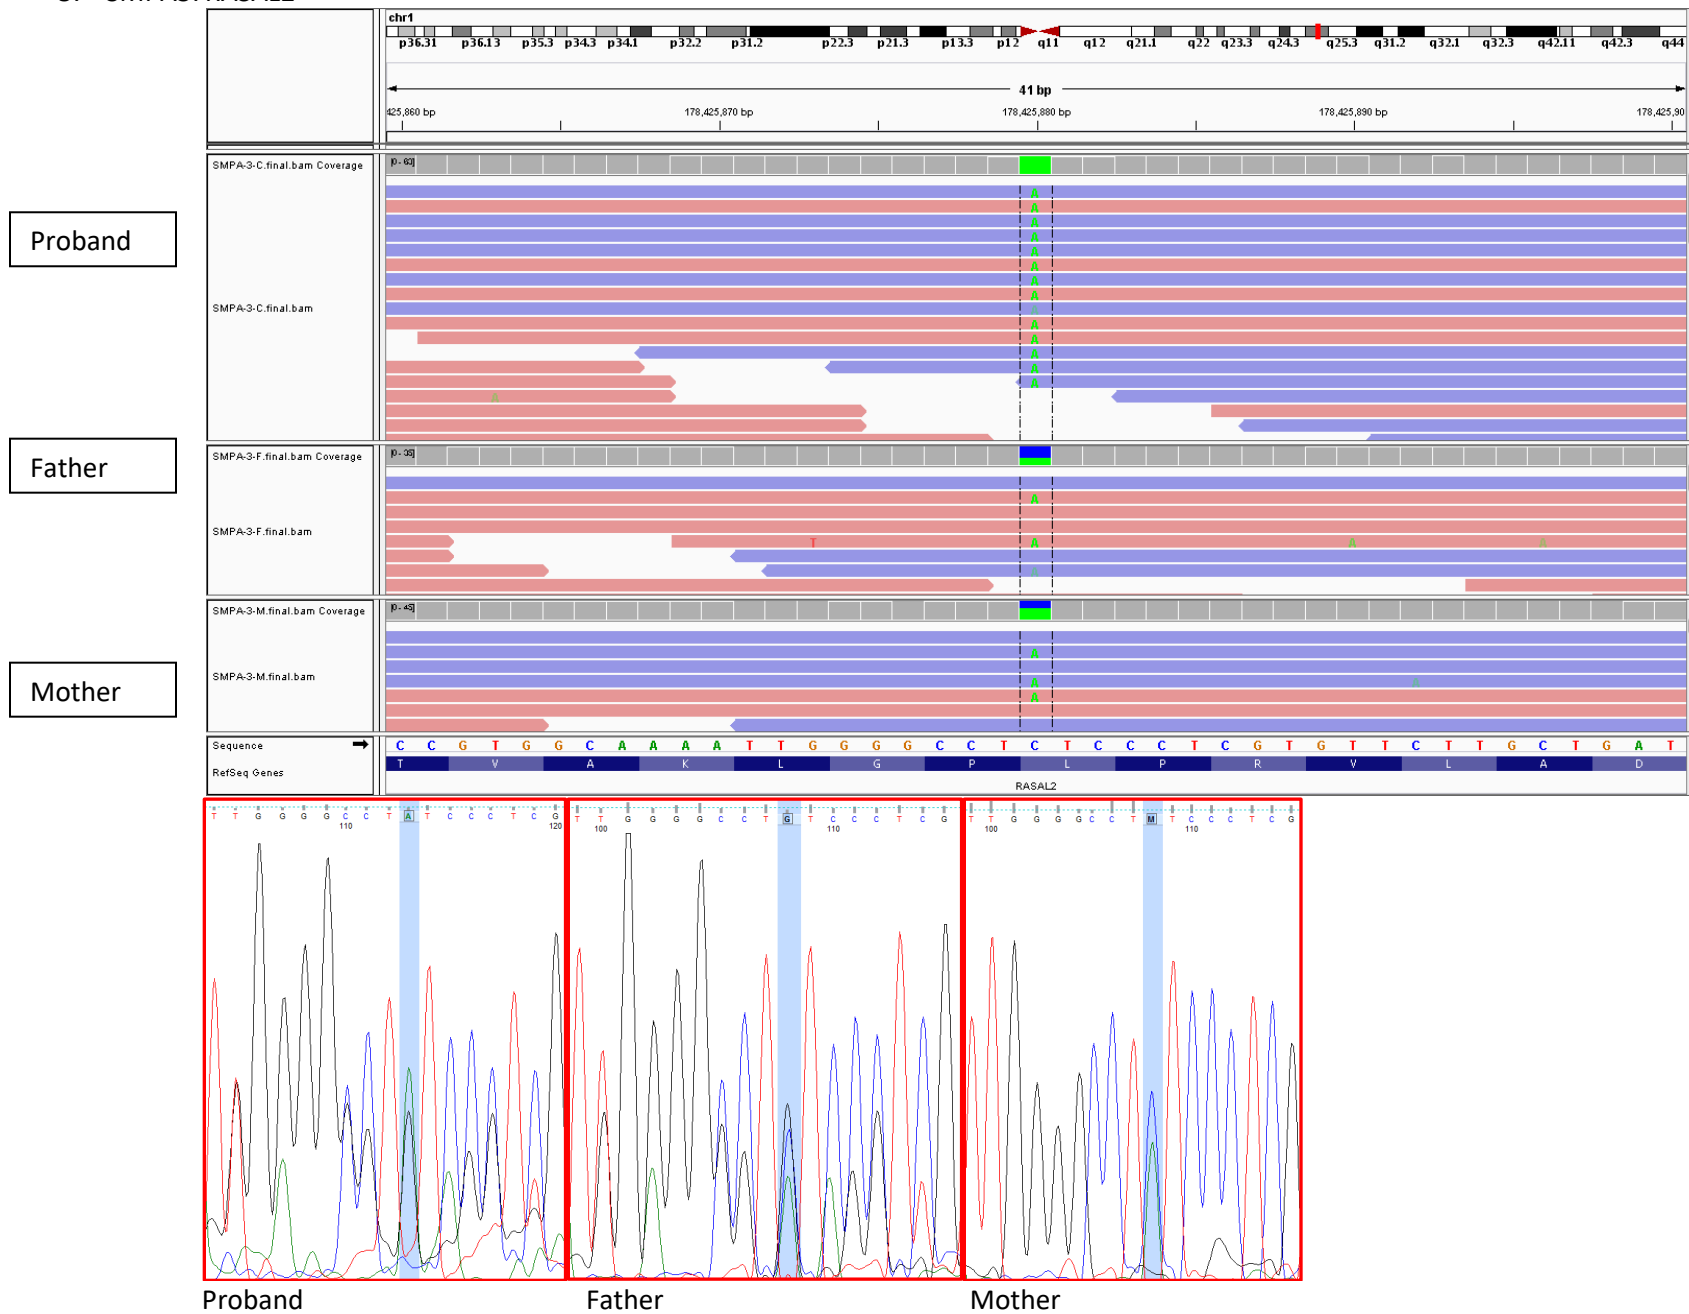

6. SMPA4: *DENND1B*

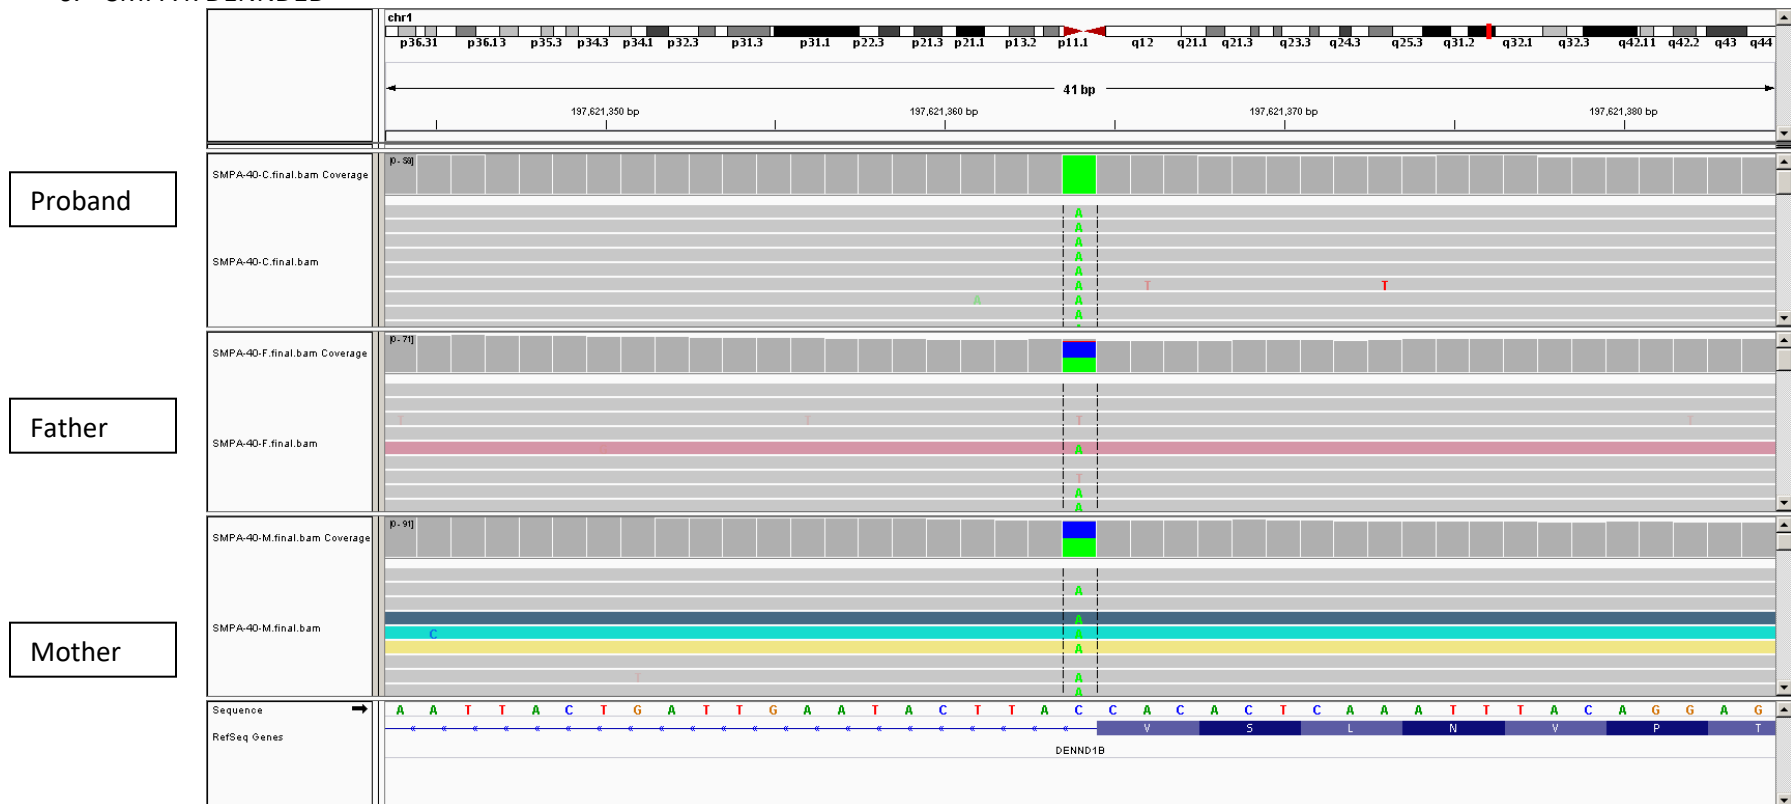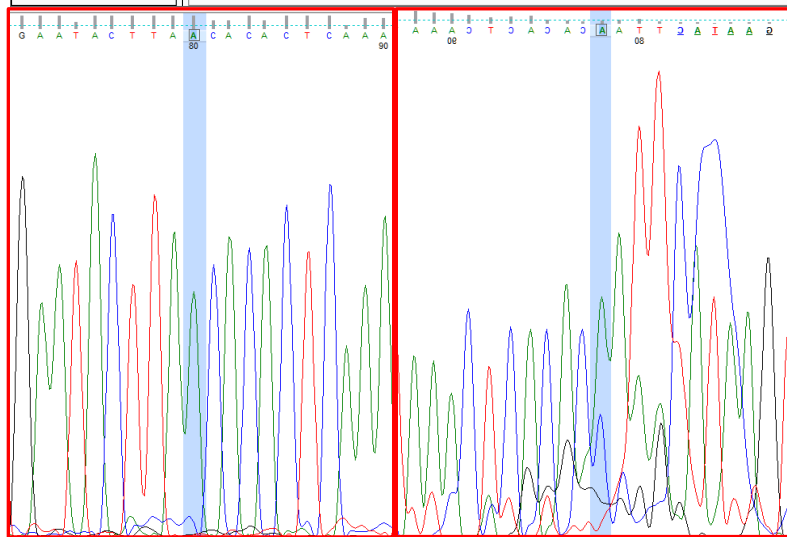

Proband

Father

7. Autism\*: *HTRA2*

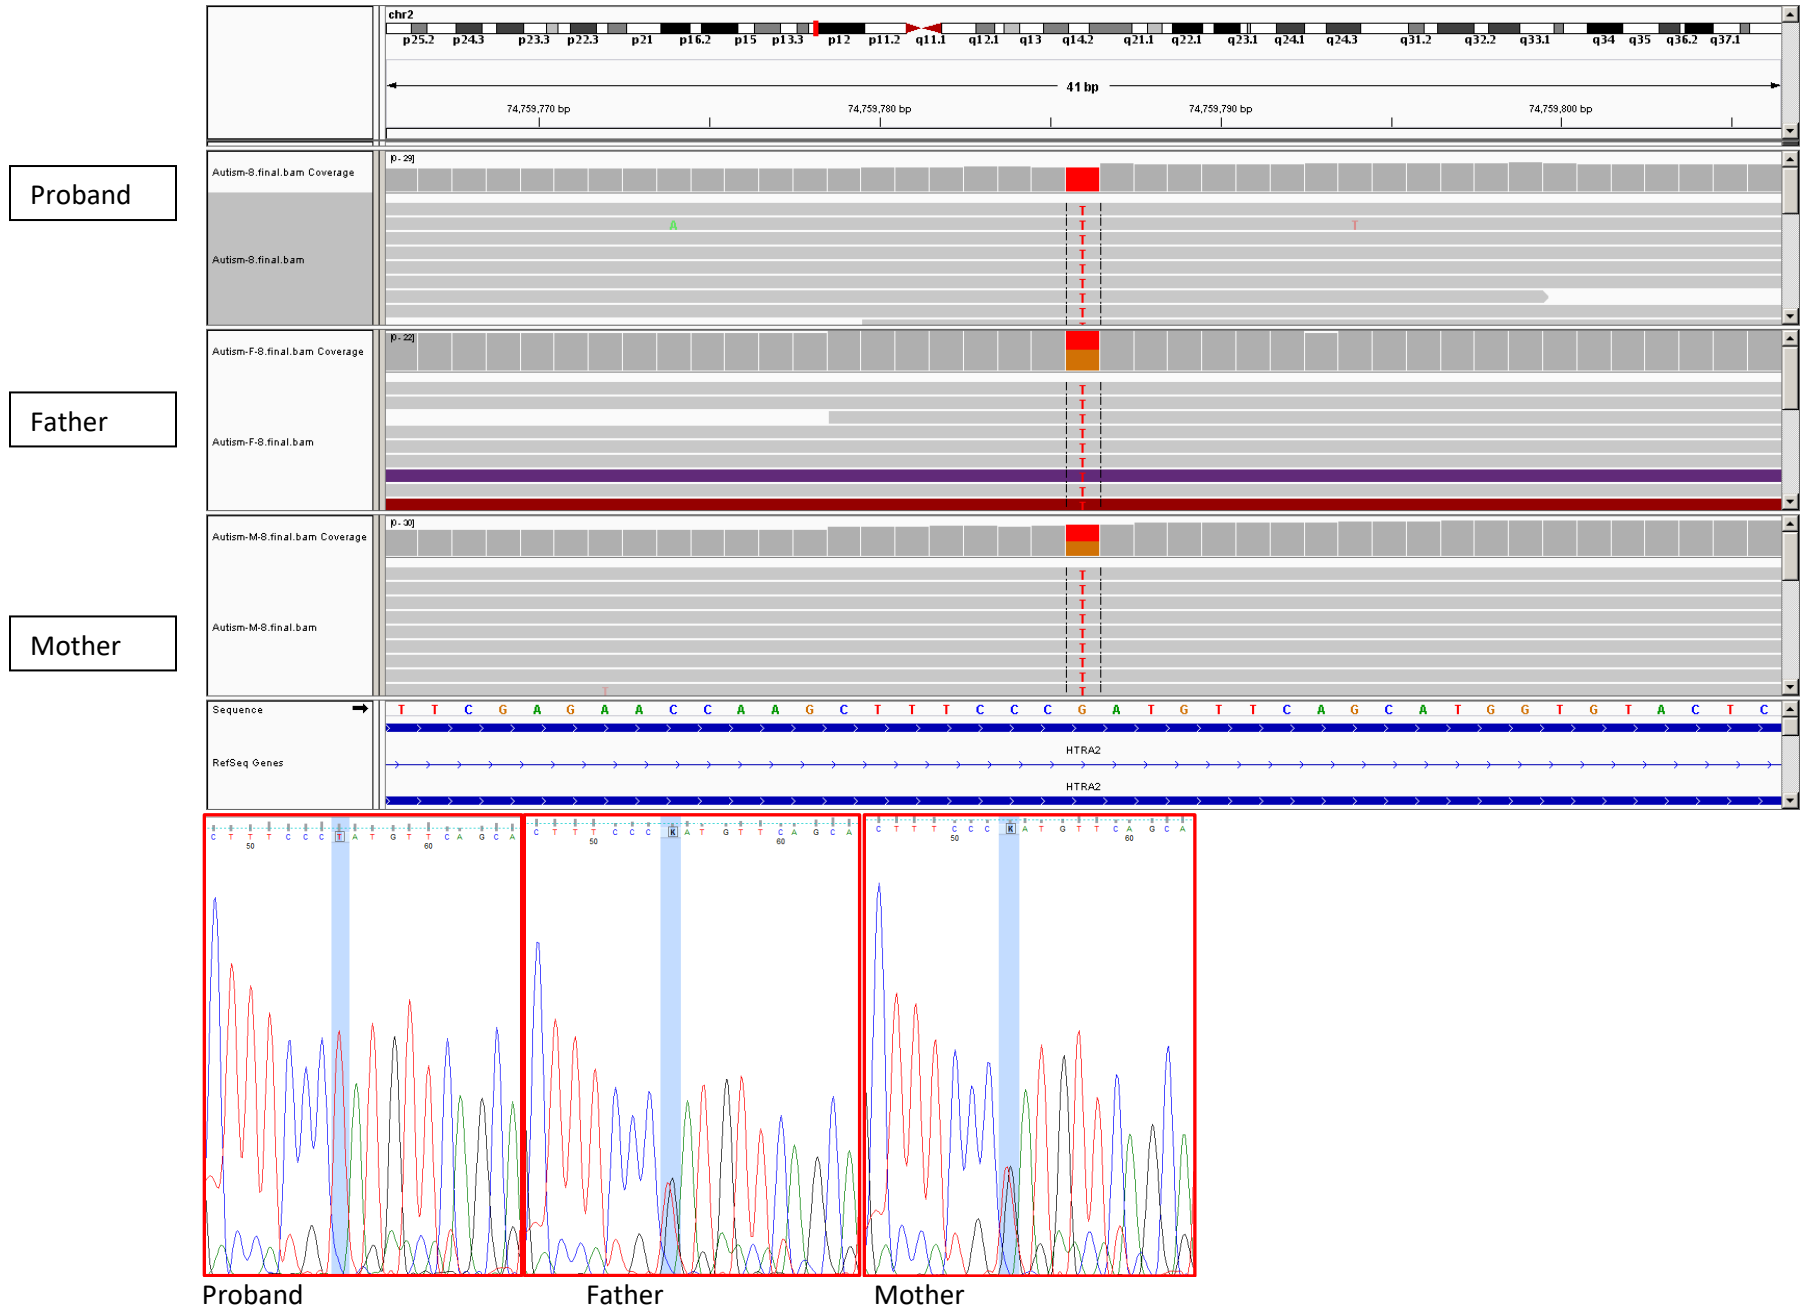

# 8. SMPA19: SCN10A

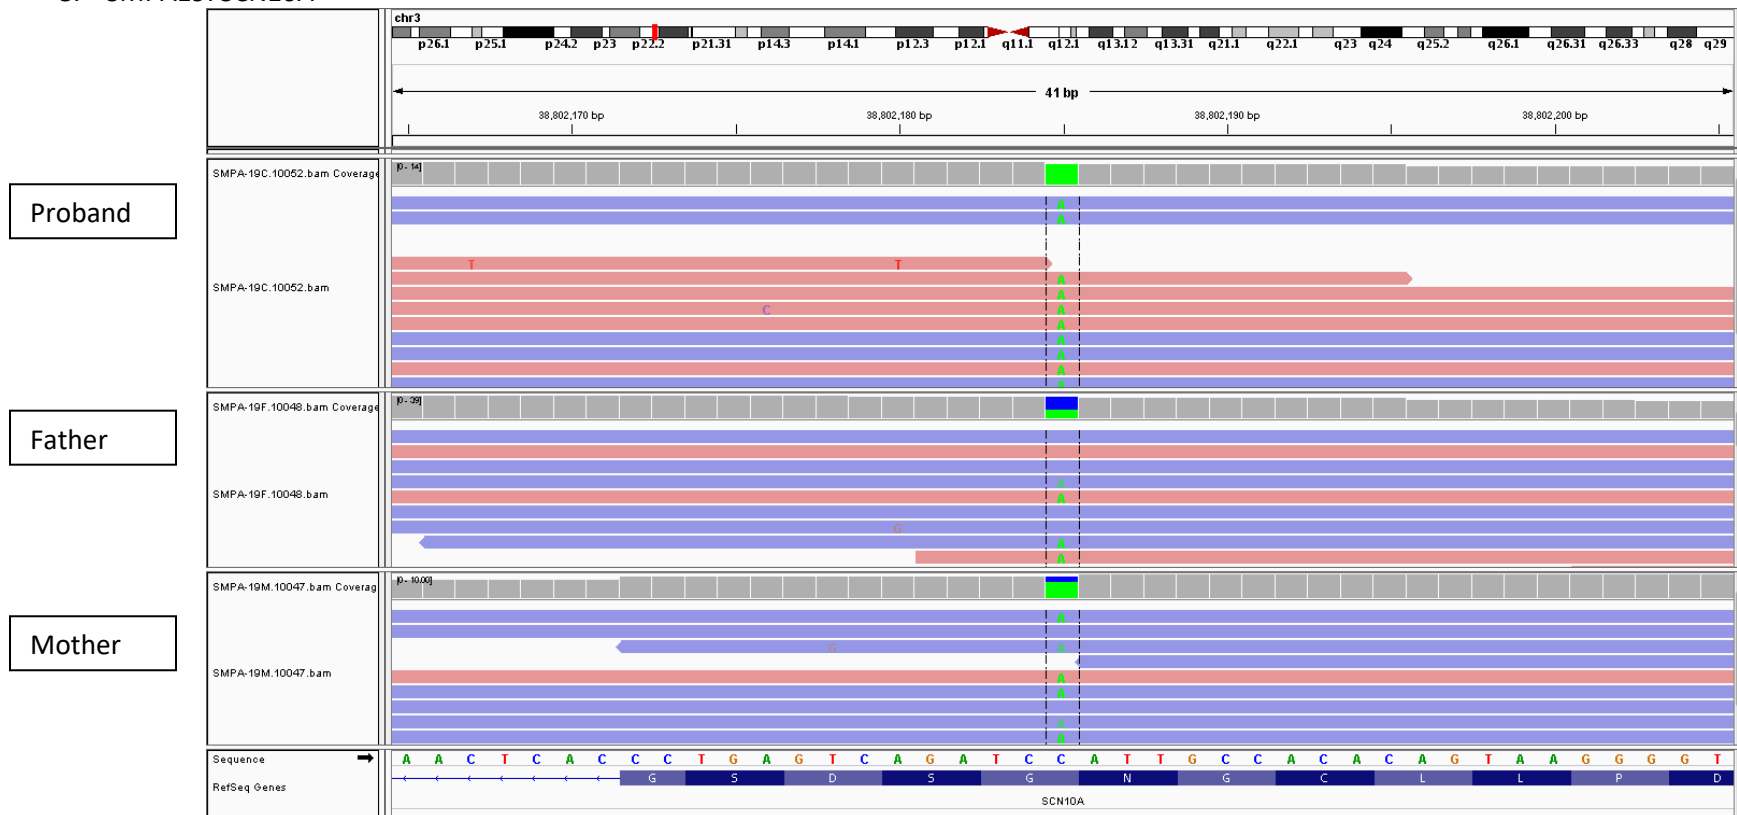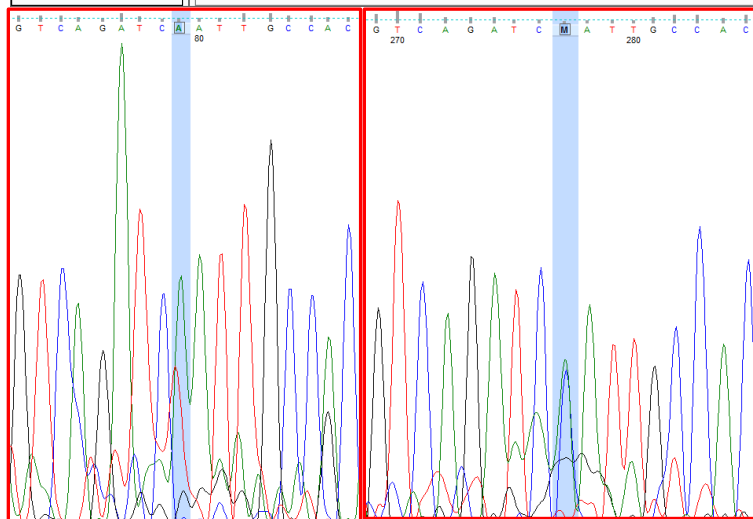

Proband

Mother



9. SMPA76: ANO10

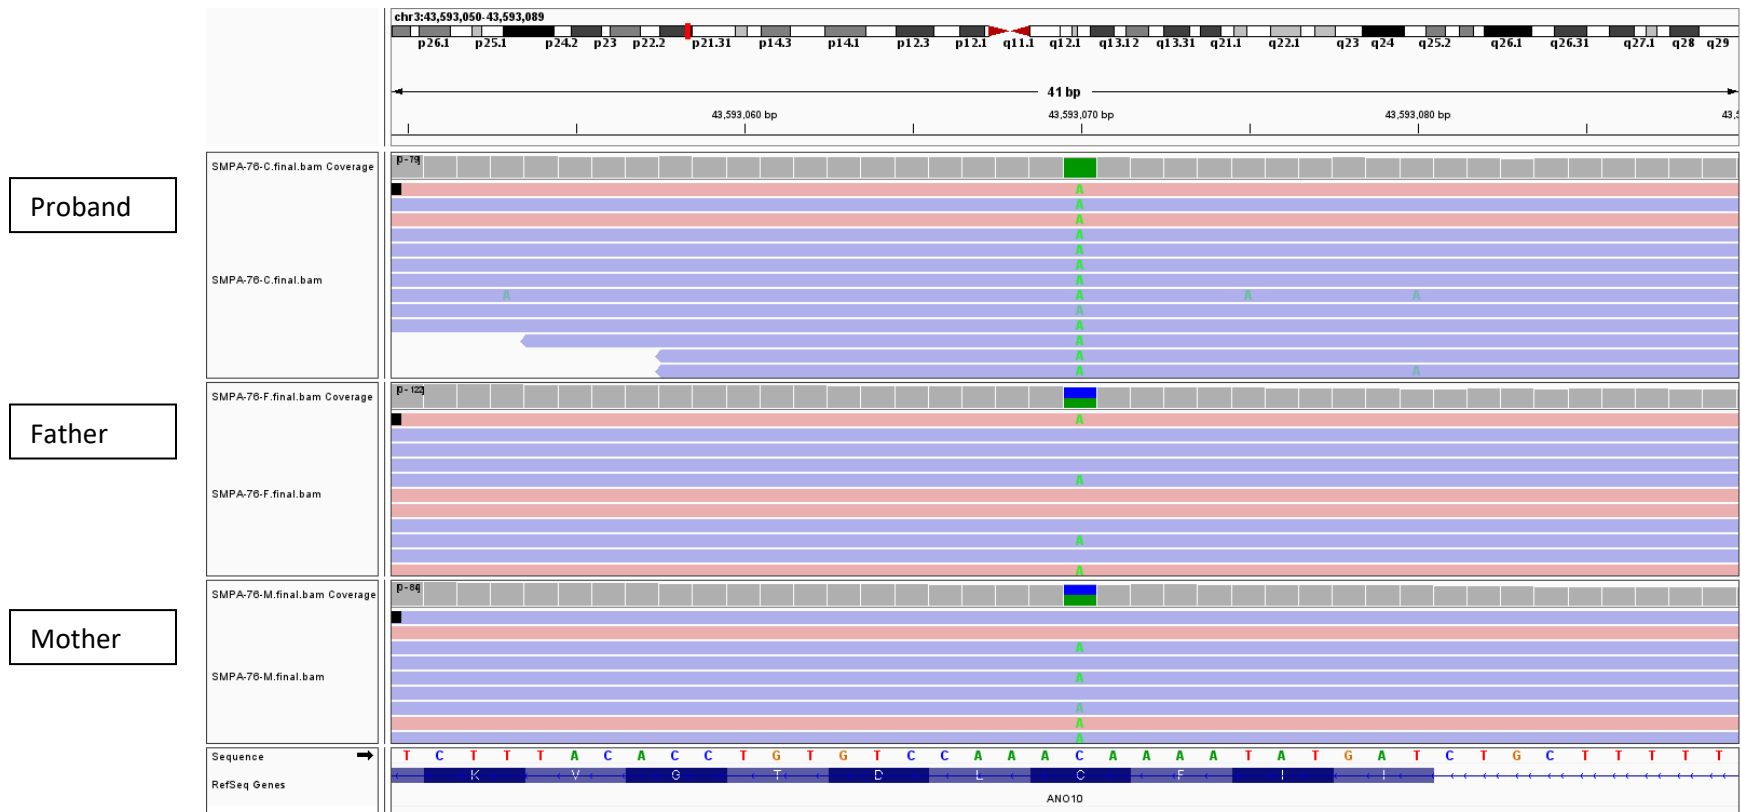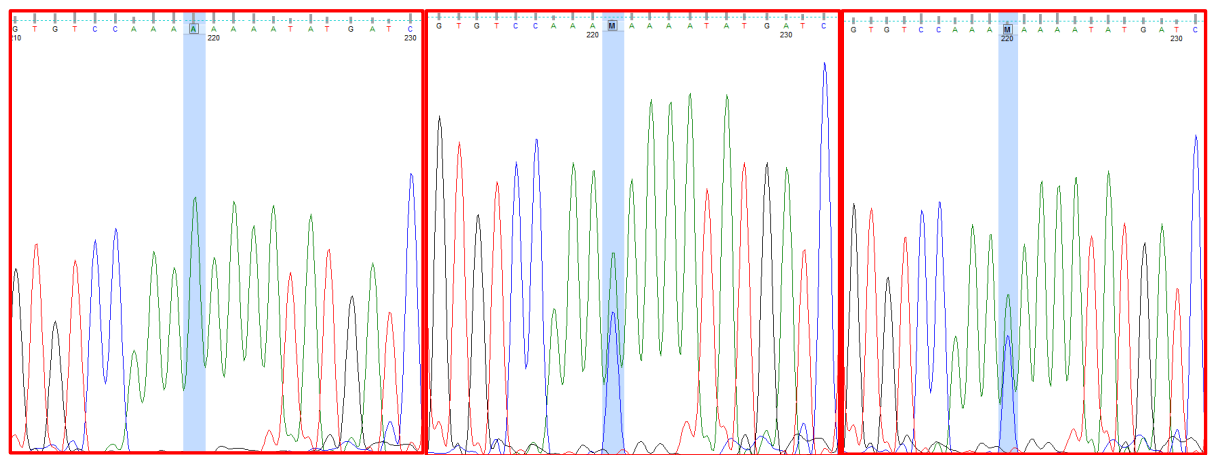

Proband

Father

Mother

10. SA15: SETD2

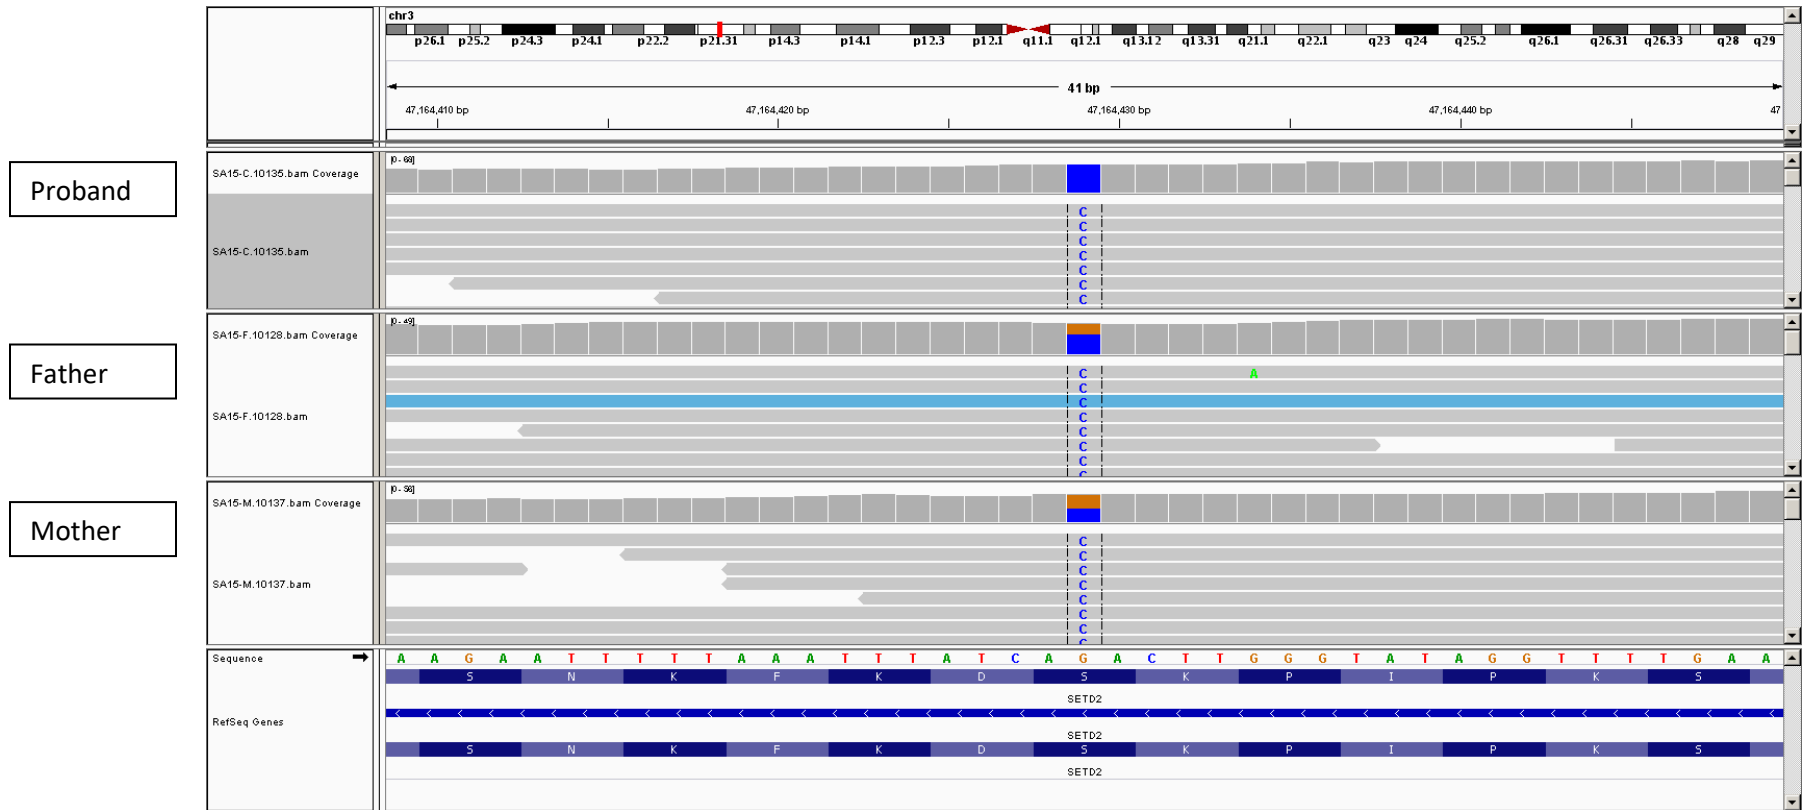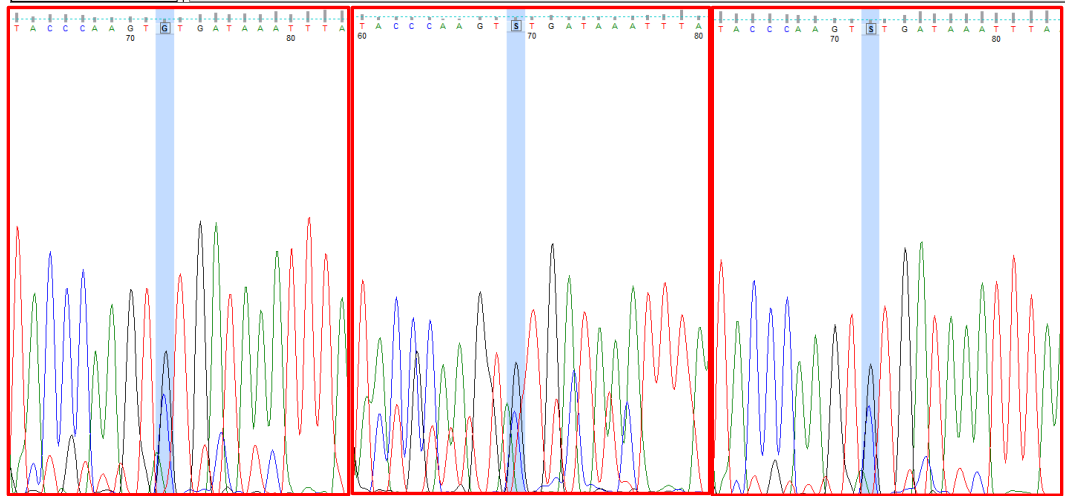

Proband

Father

Mother

# 11. SMPA27: EPHB1

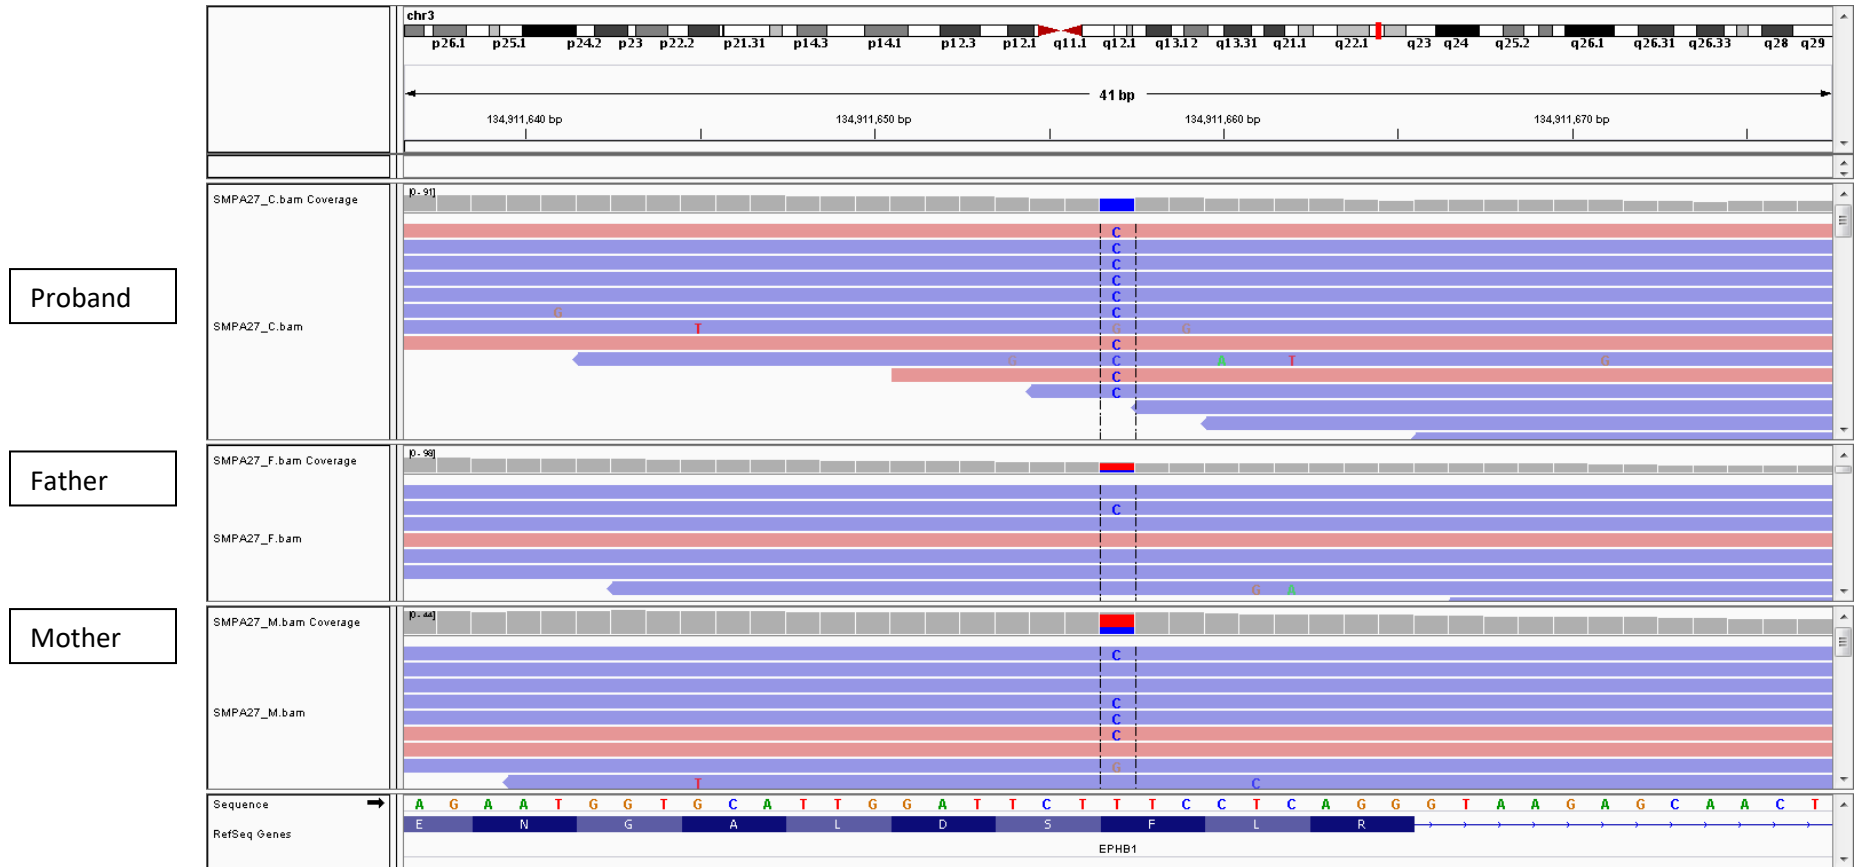

Proband

Father

Mother

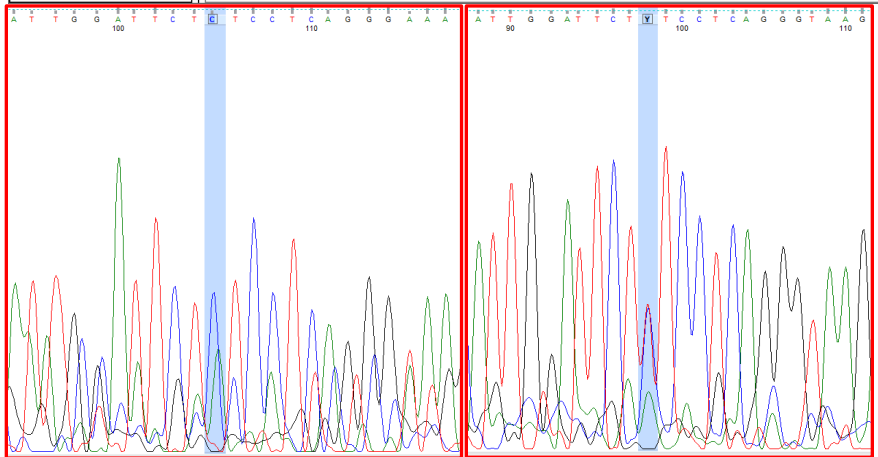

Proband

Mother

## 12. Autism3: *RSRC1*

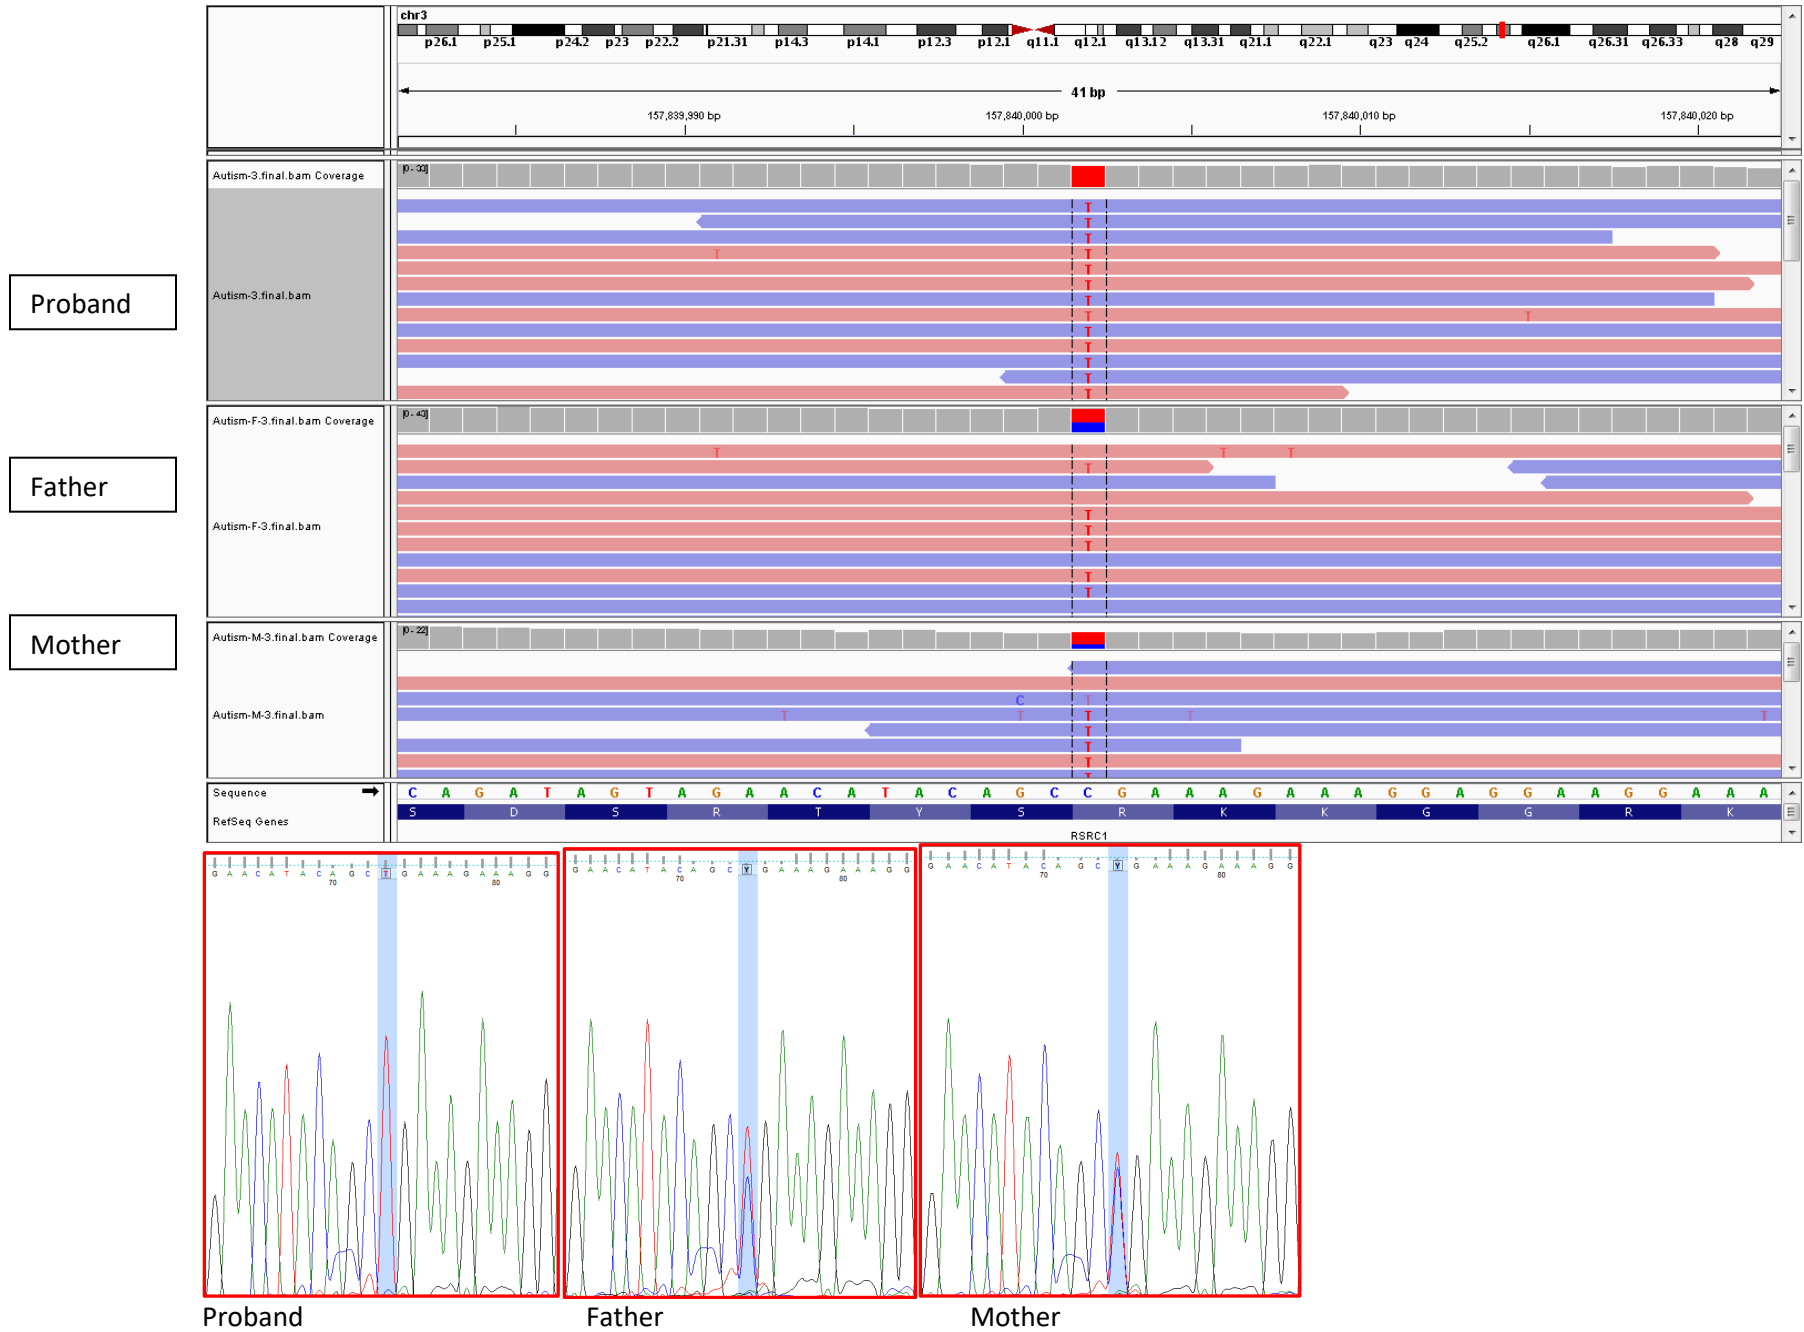

13. SMPA8: *LRRC34*

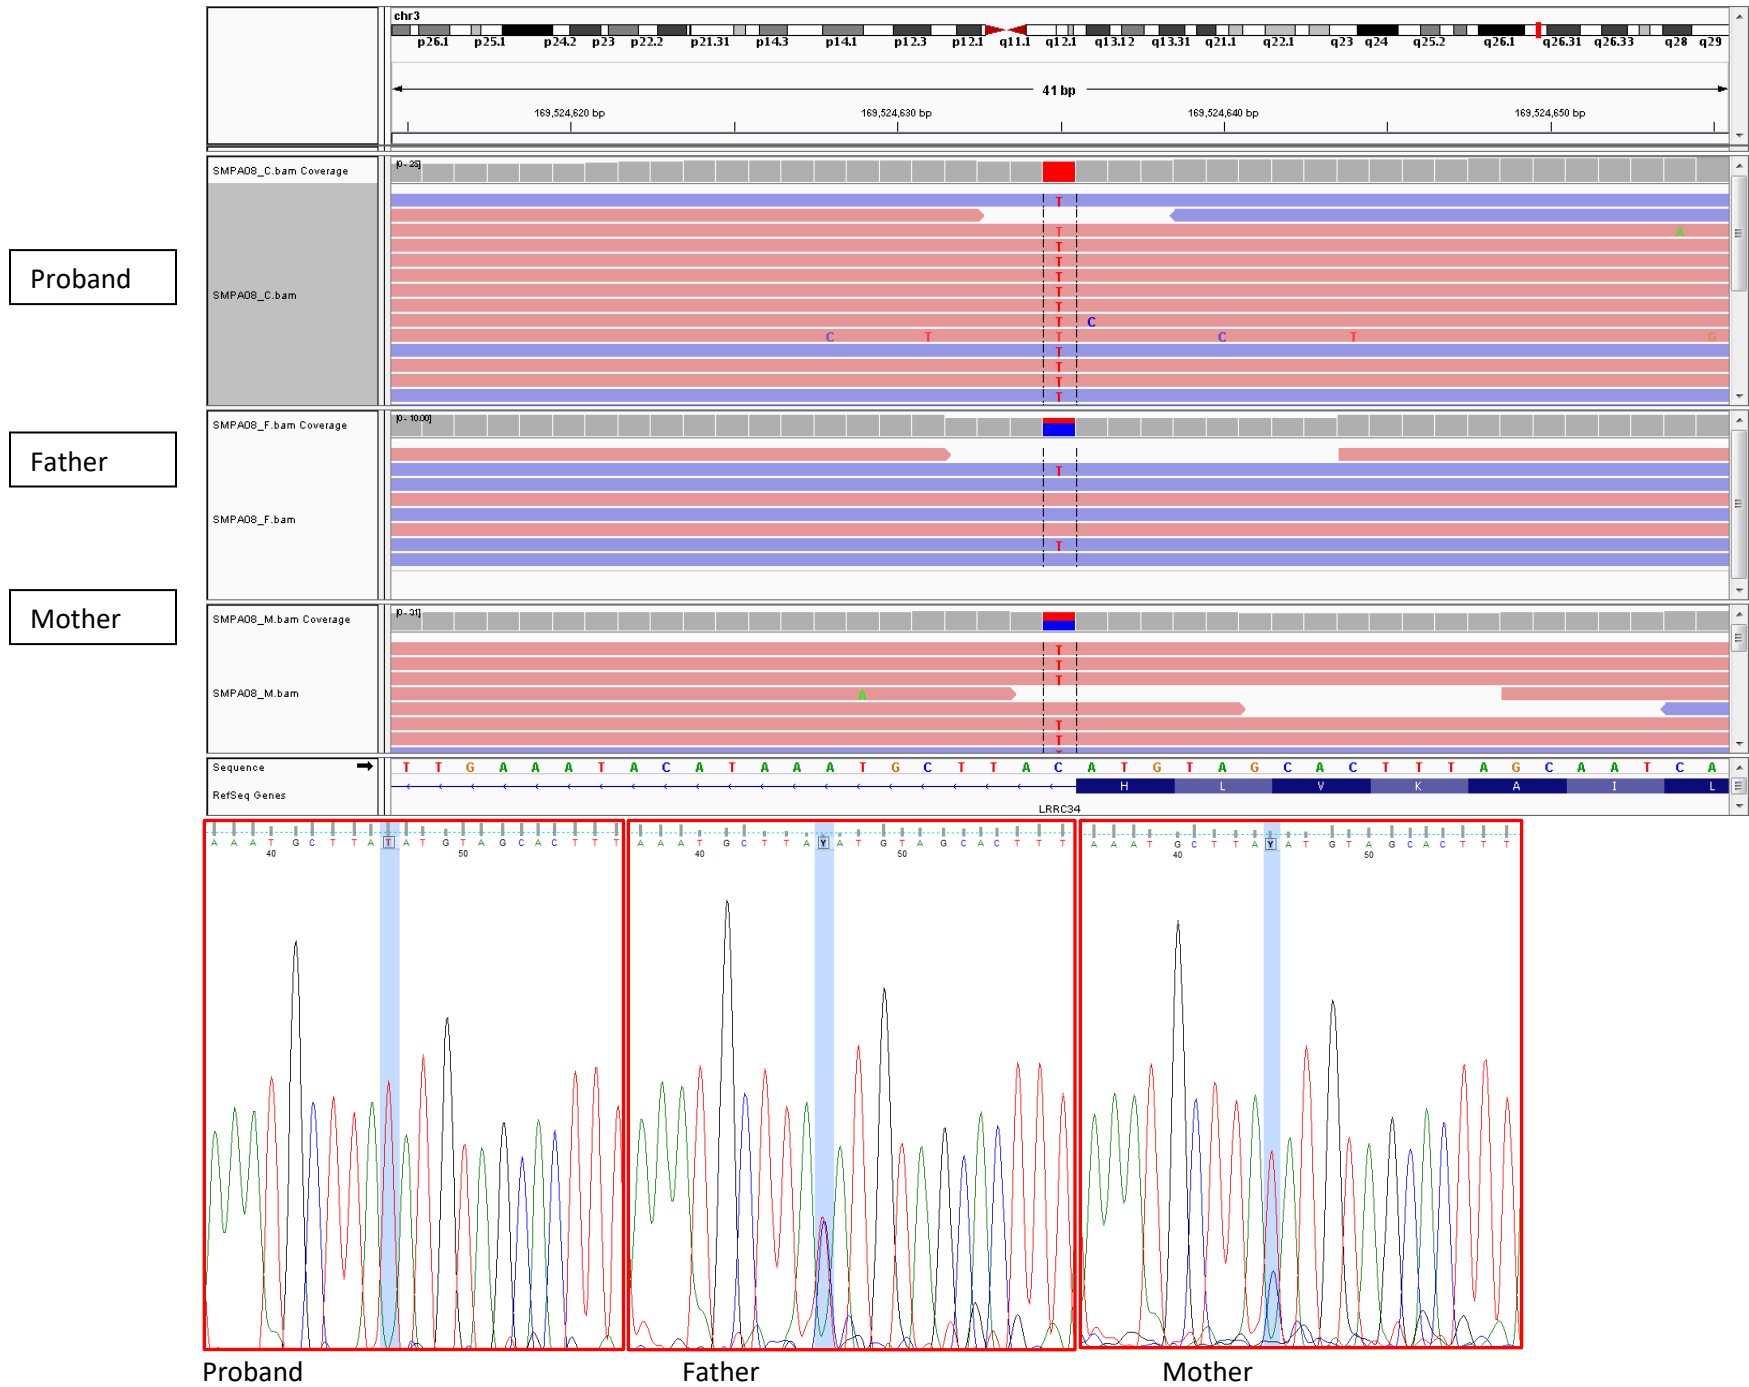

14. IAU66: DDIT4L

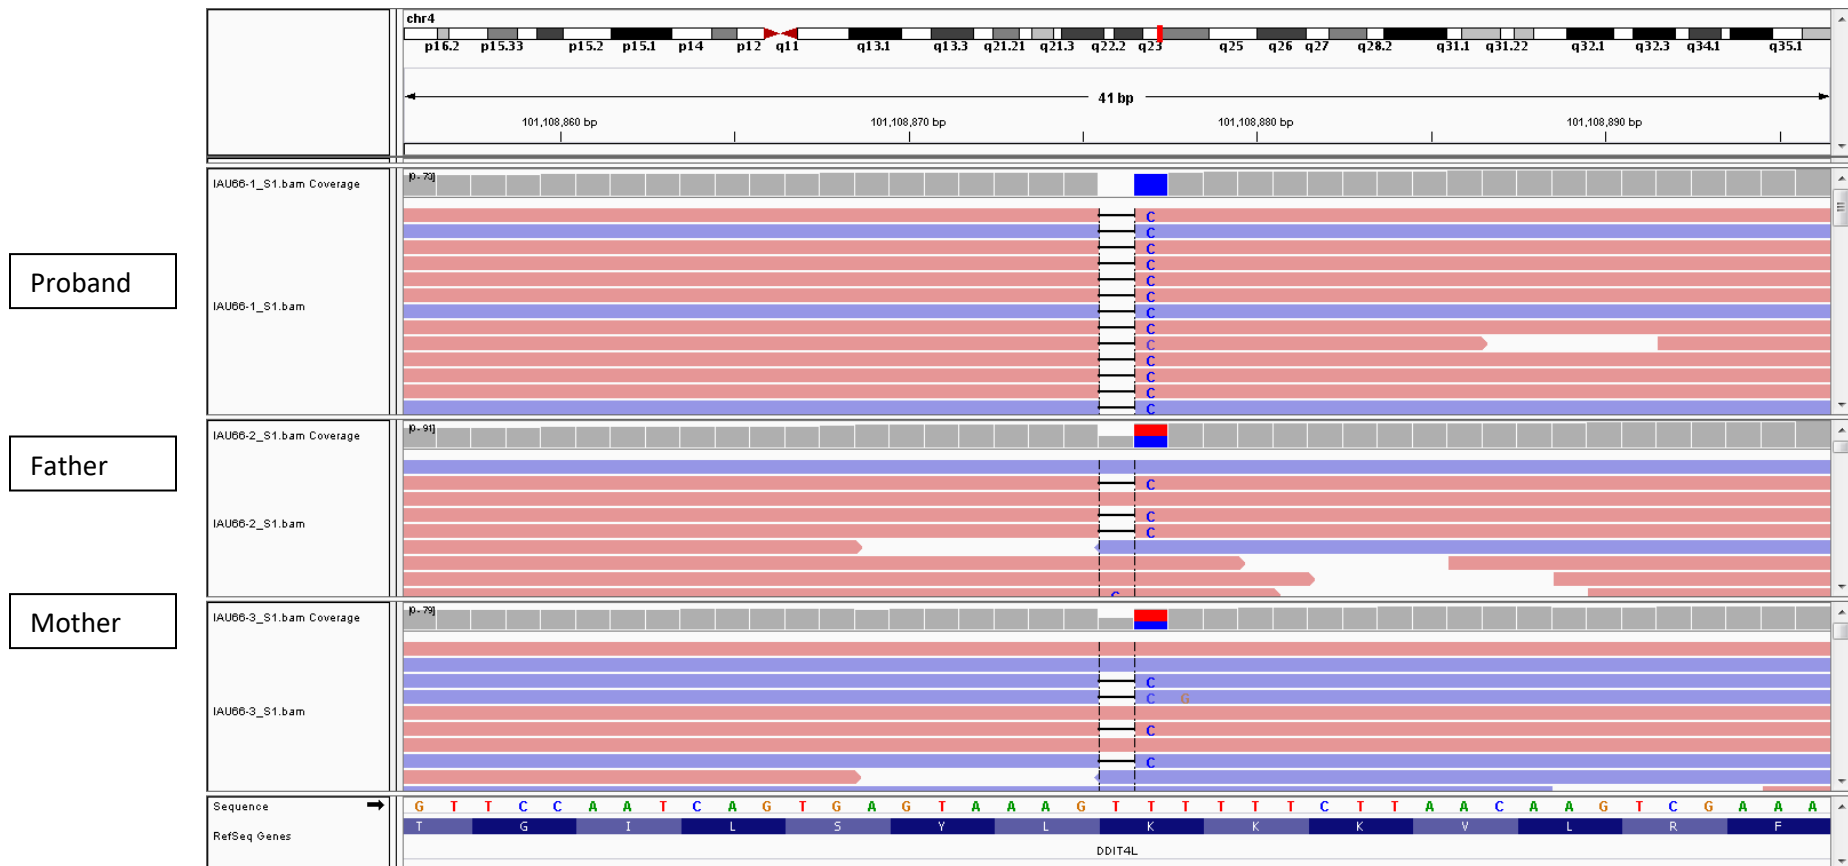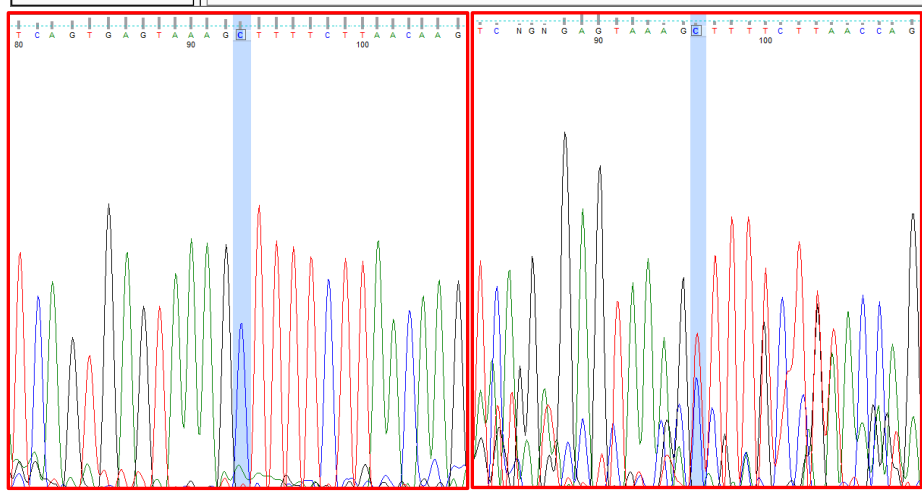

Proband

Father

15. RQPA12: AGA

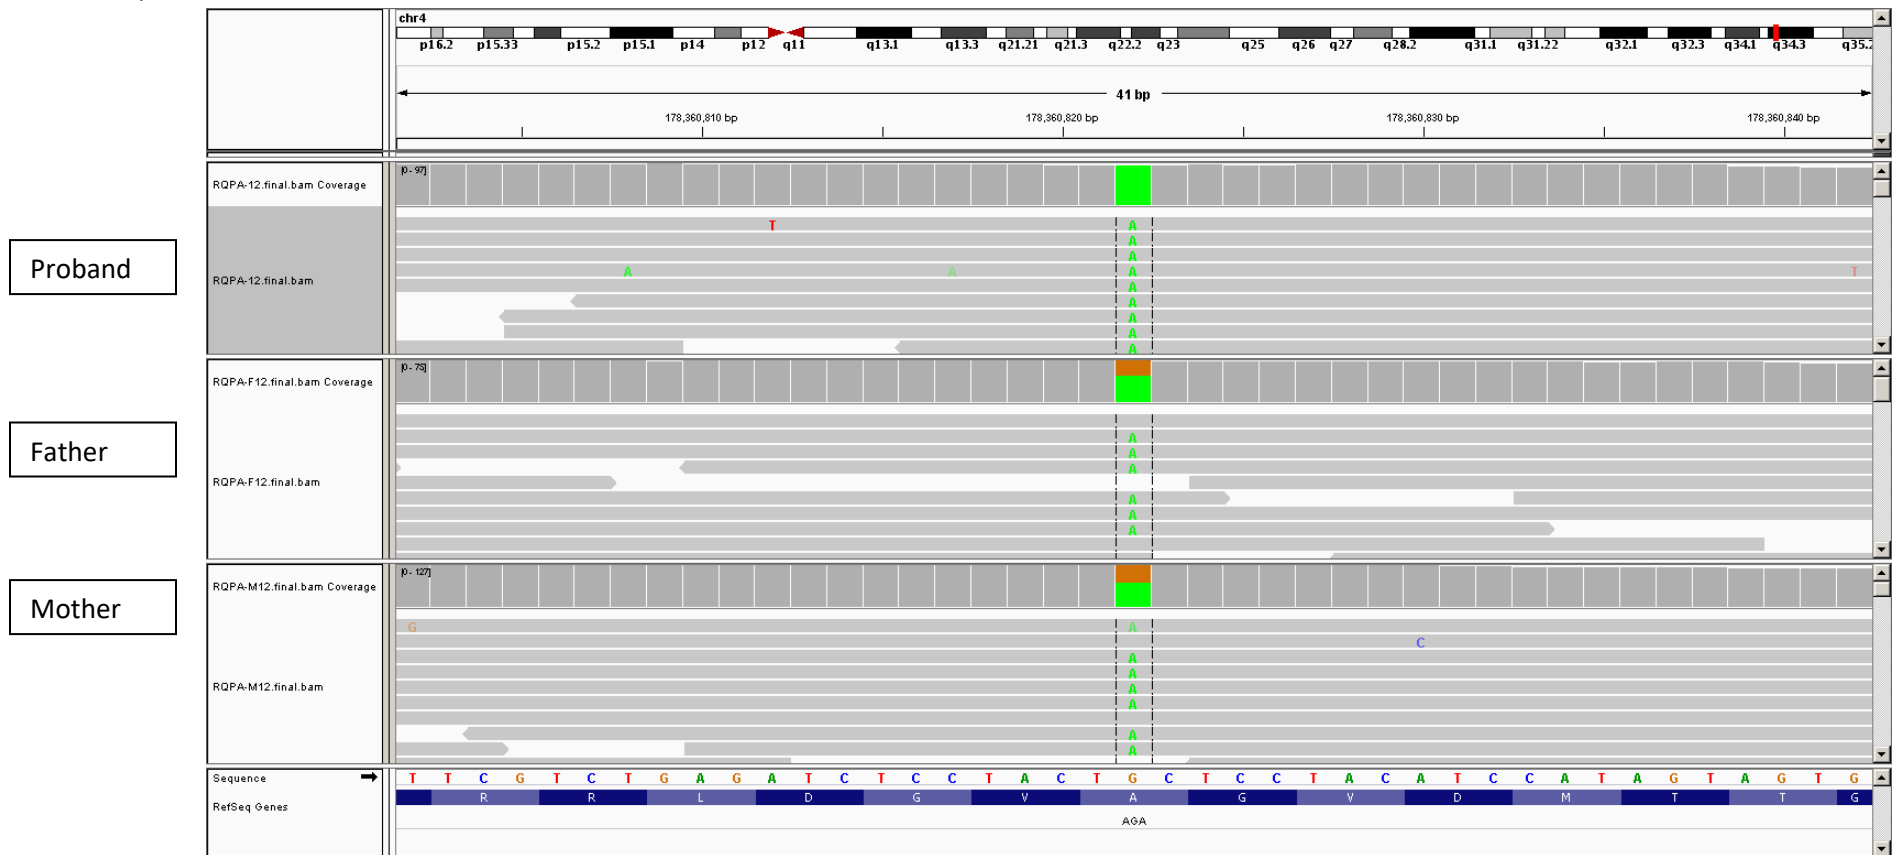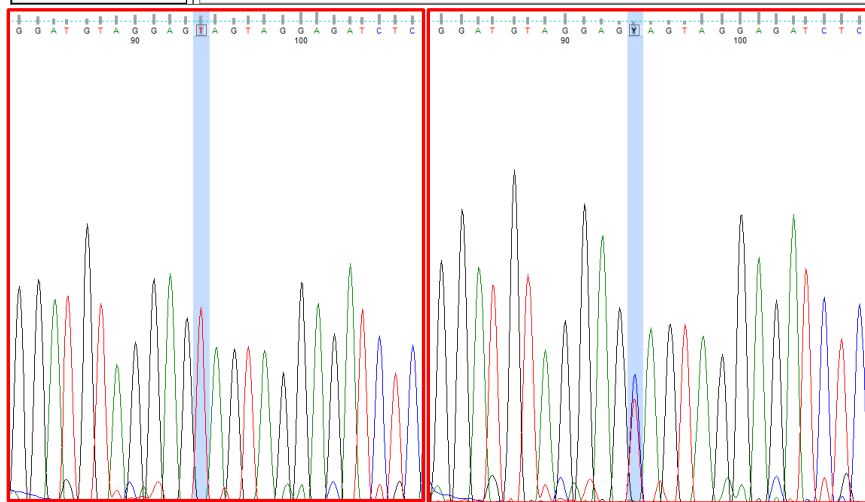

Proband

Mother

16. SMPA35: ENPP6

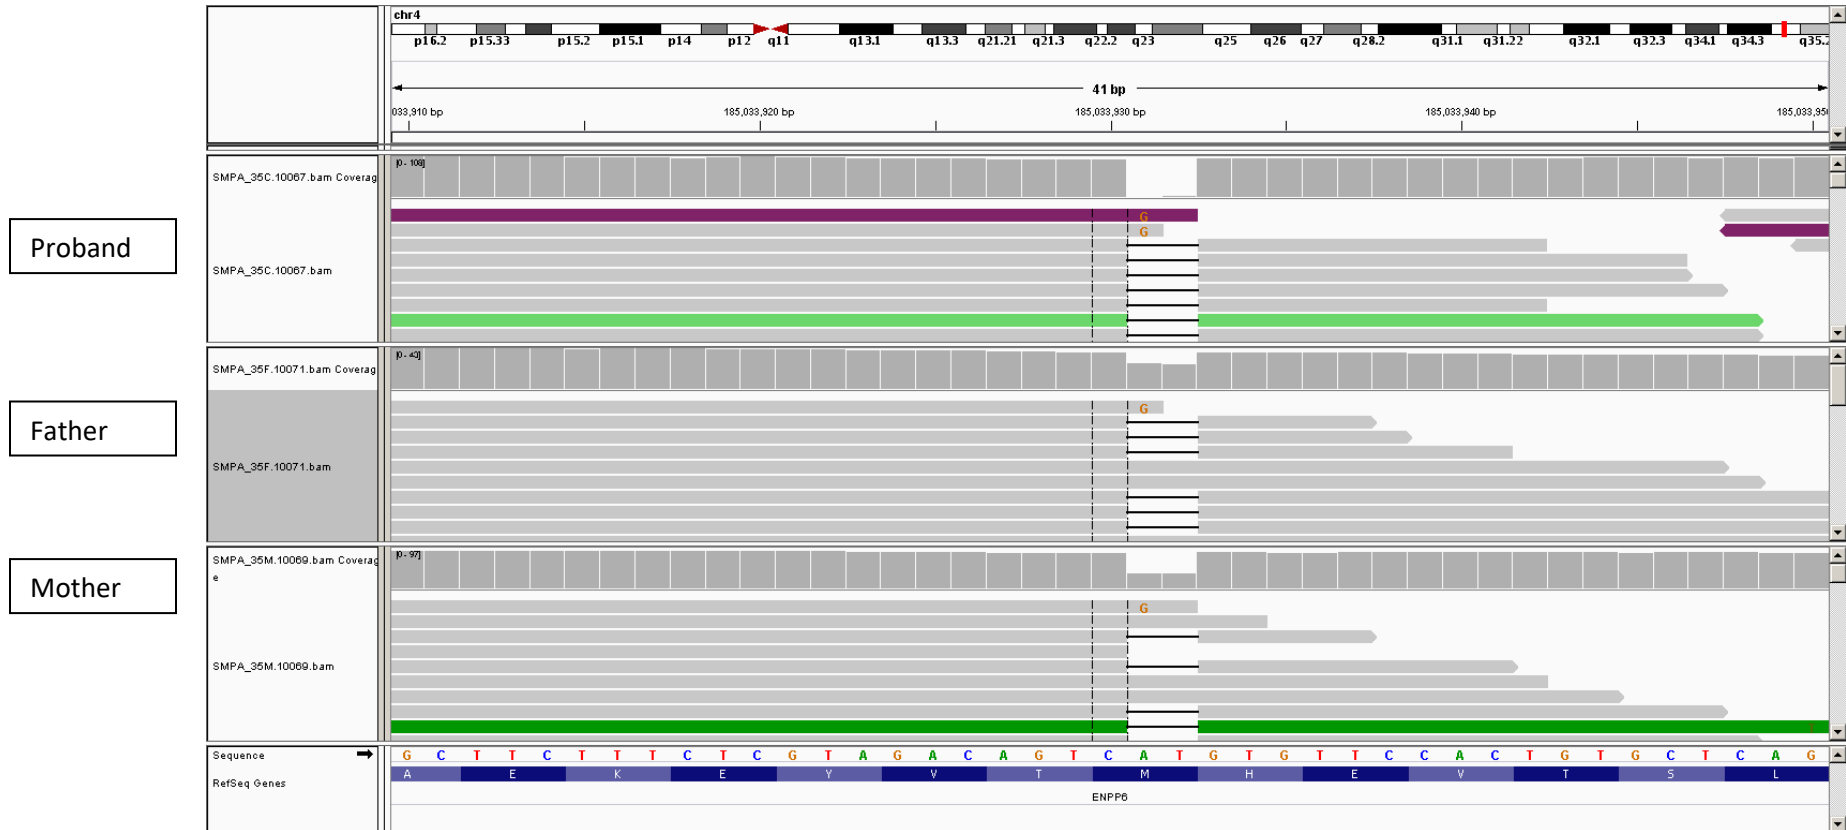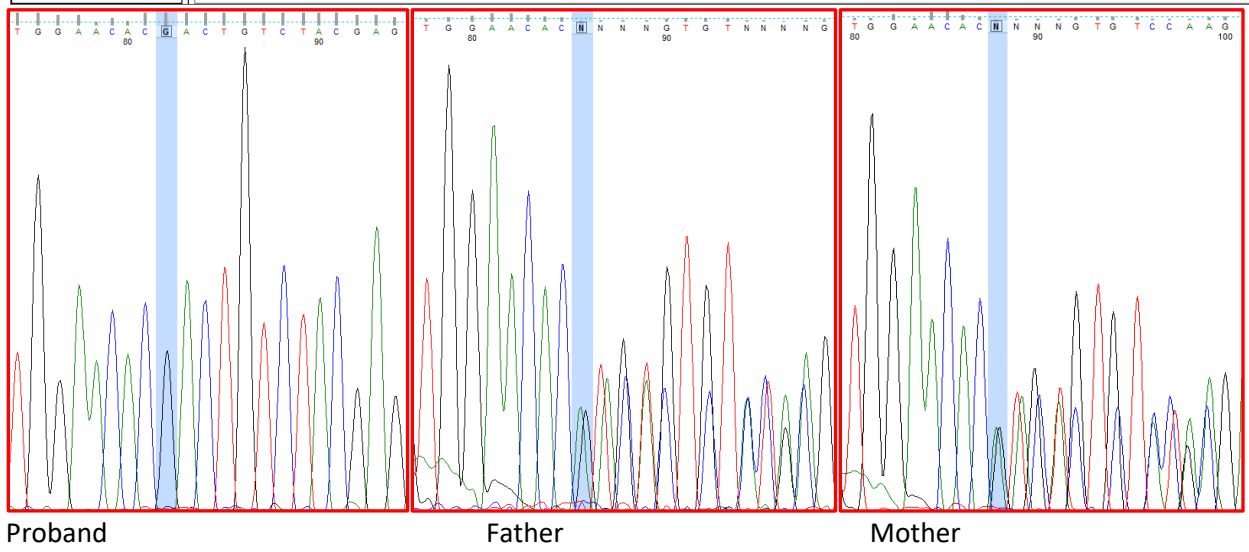



17. IABB1: CAPSL

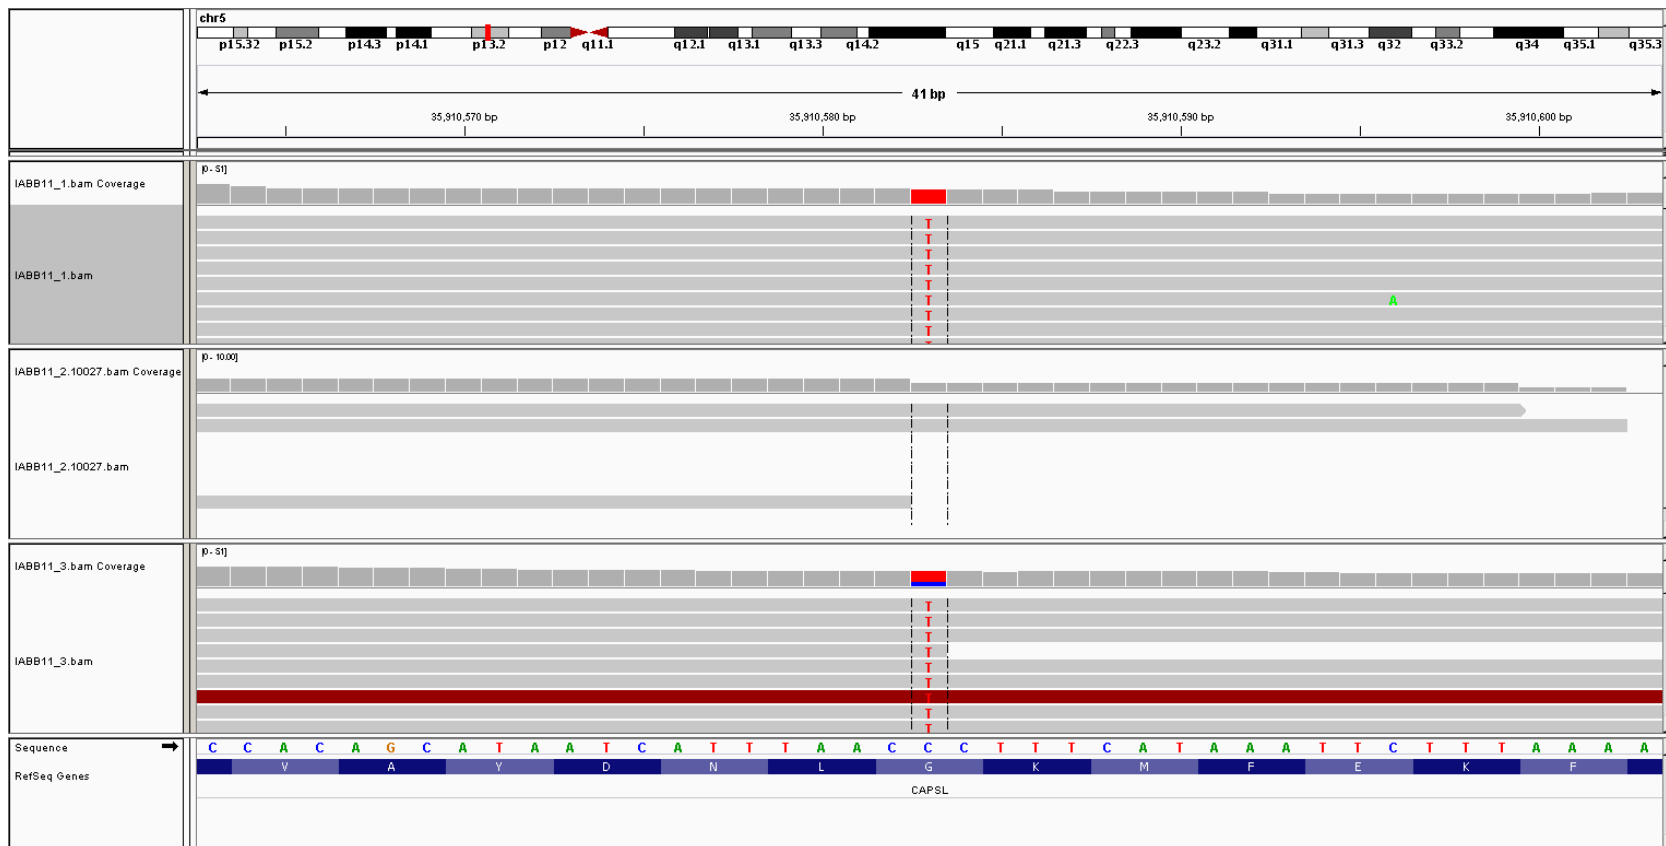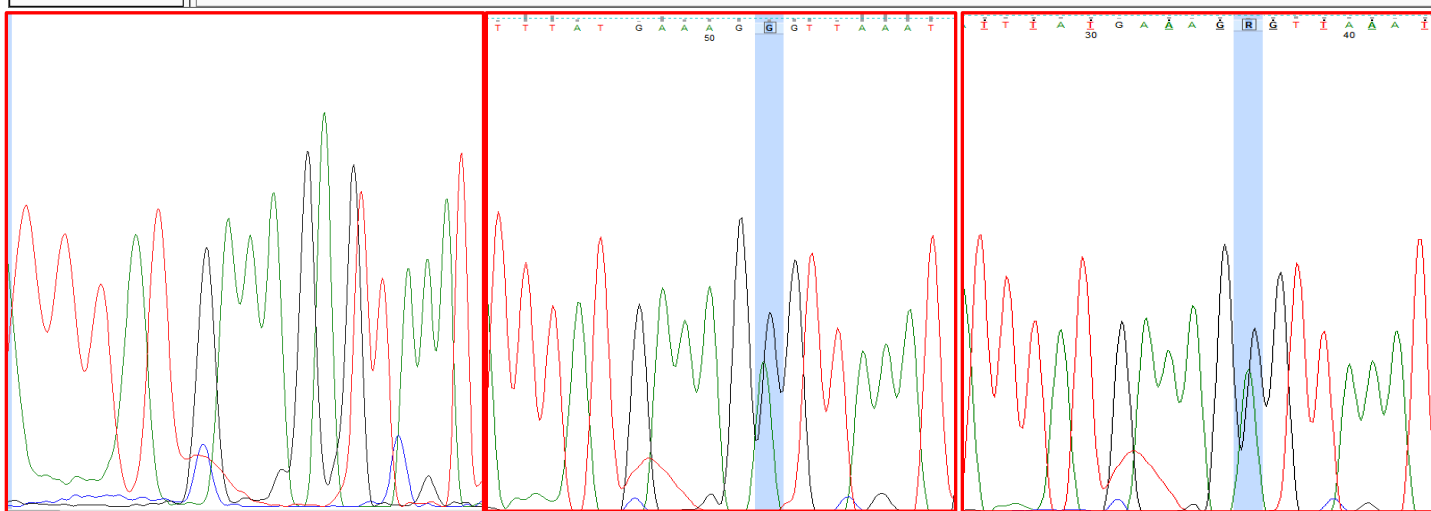

Proband

Father

Mother

18. Autism8: *SLC36A1*

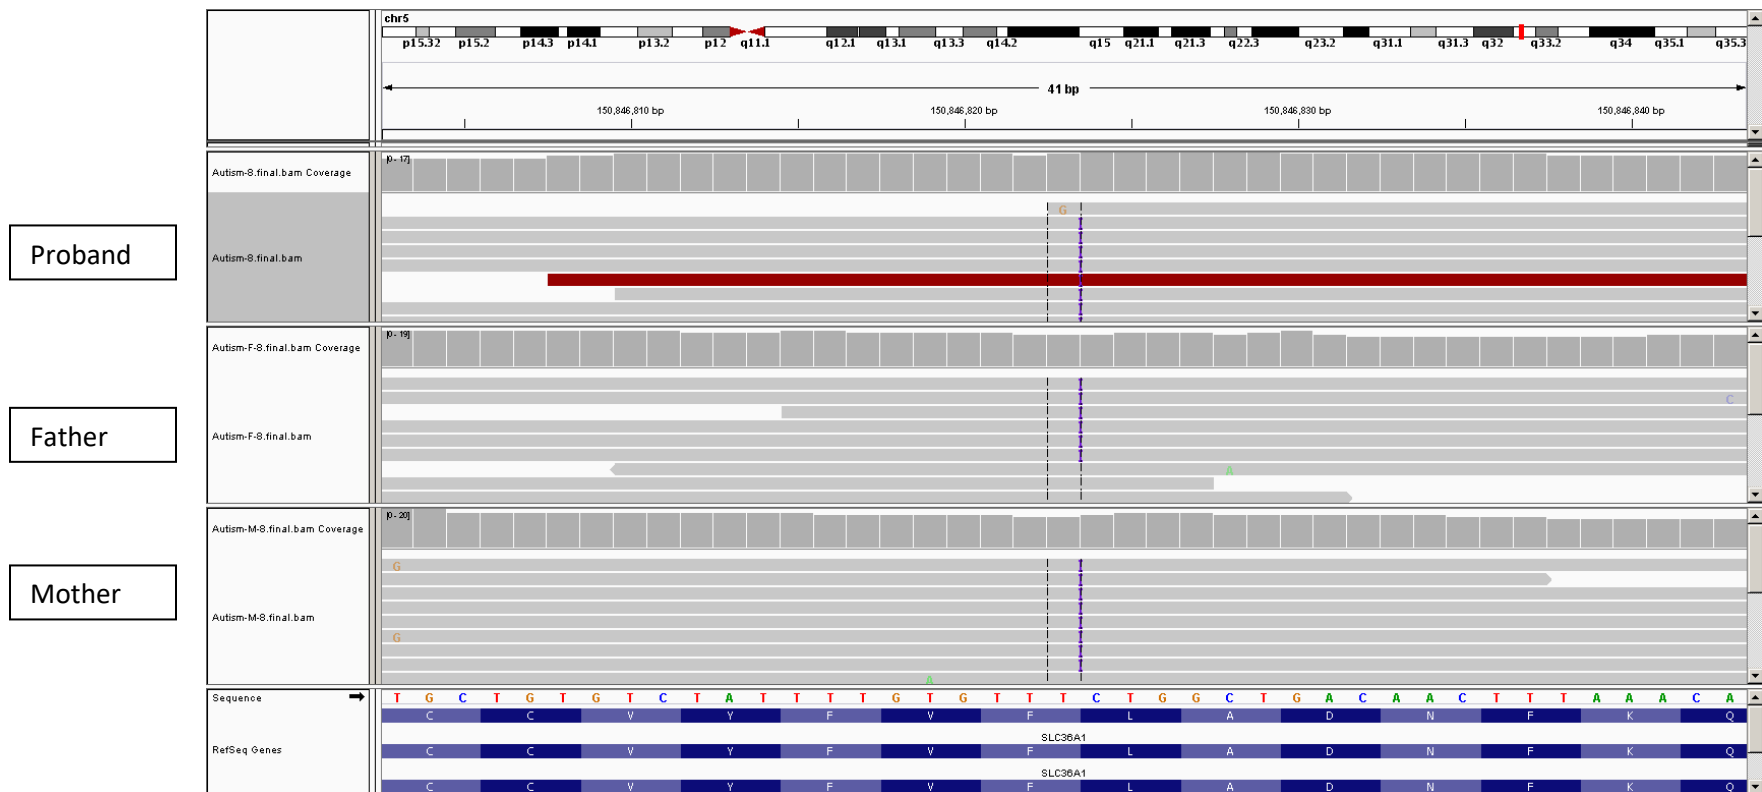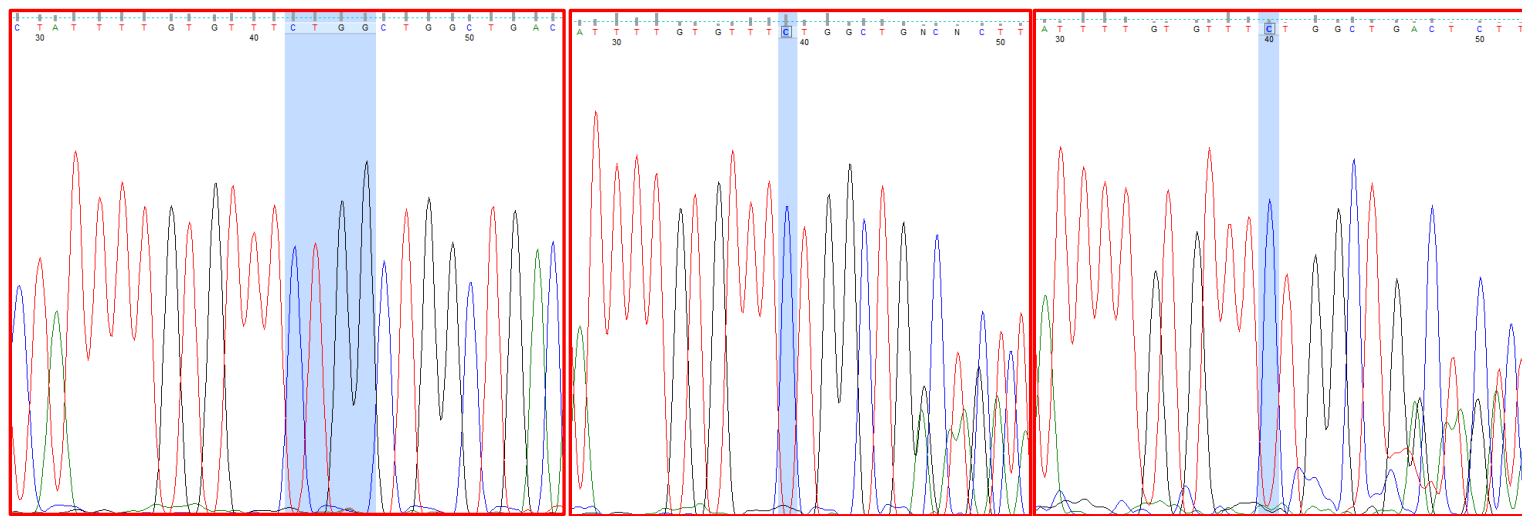

Proband

Father

Mother

19. IAU56: FAXDC2

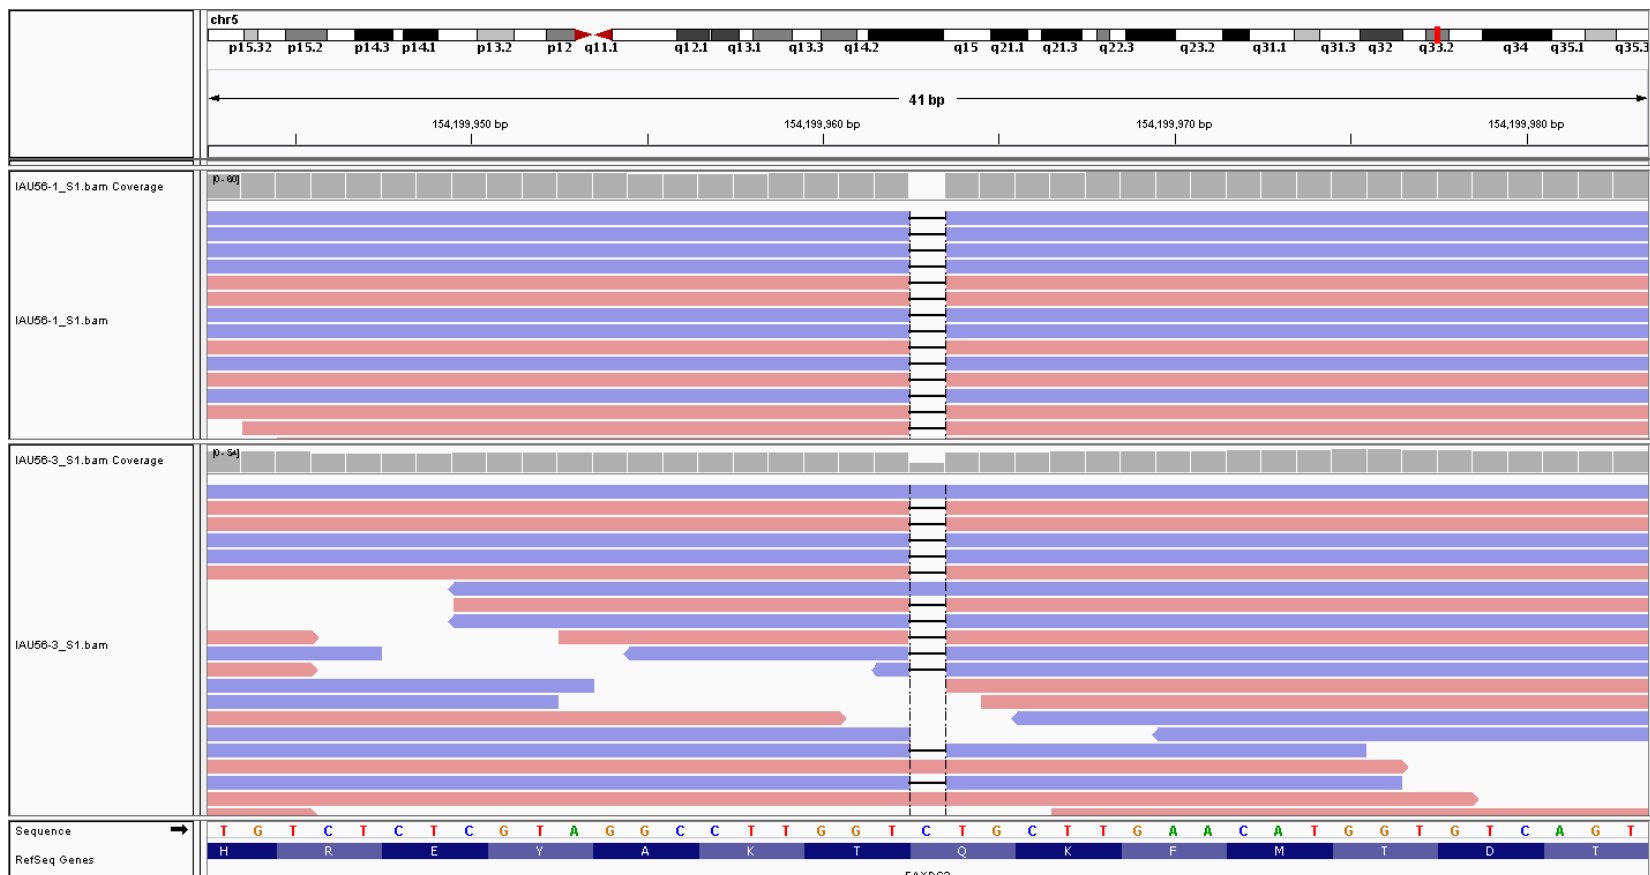

Proband

Mother

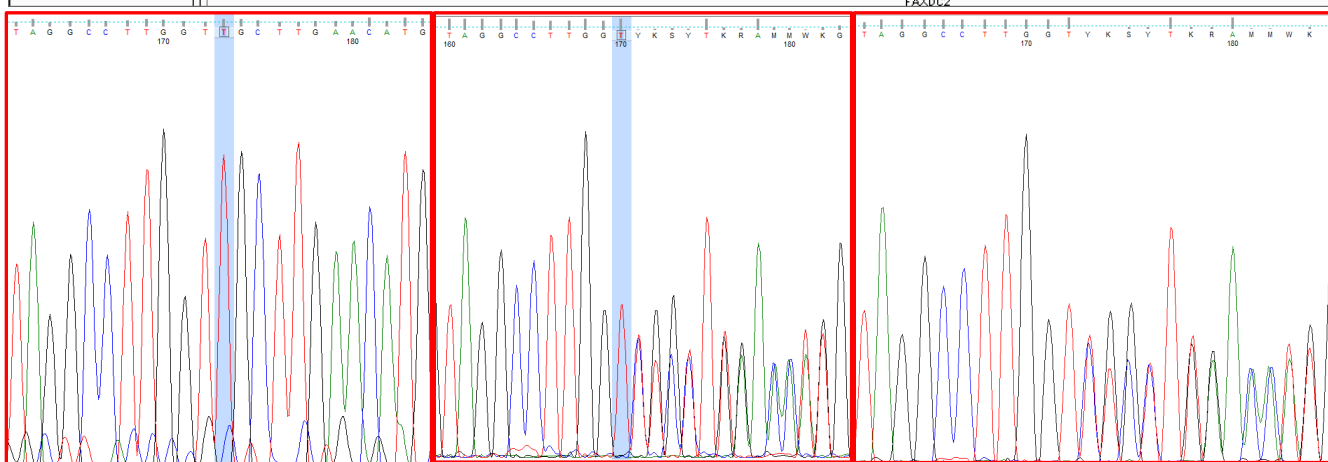

Proband

Father

Mother

20. SMPA48: RANBP9

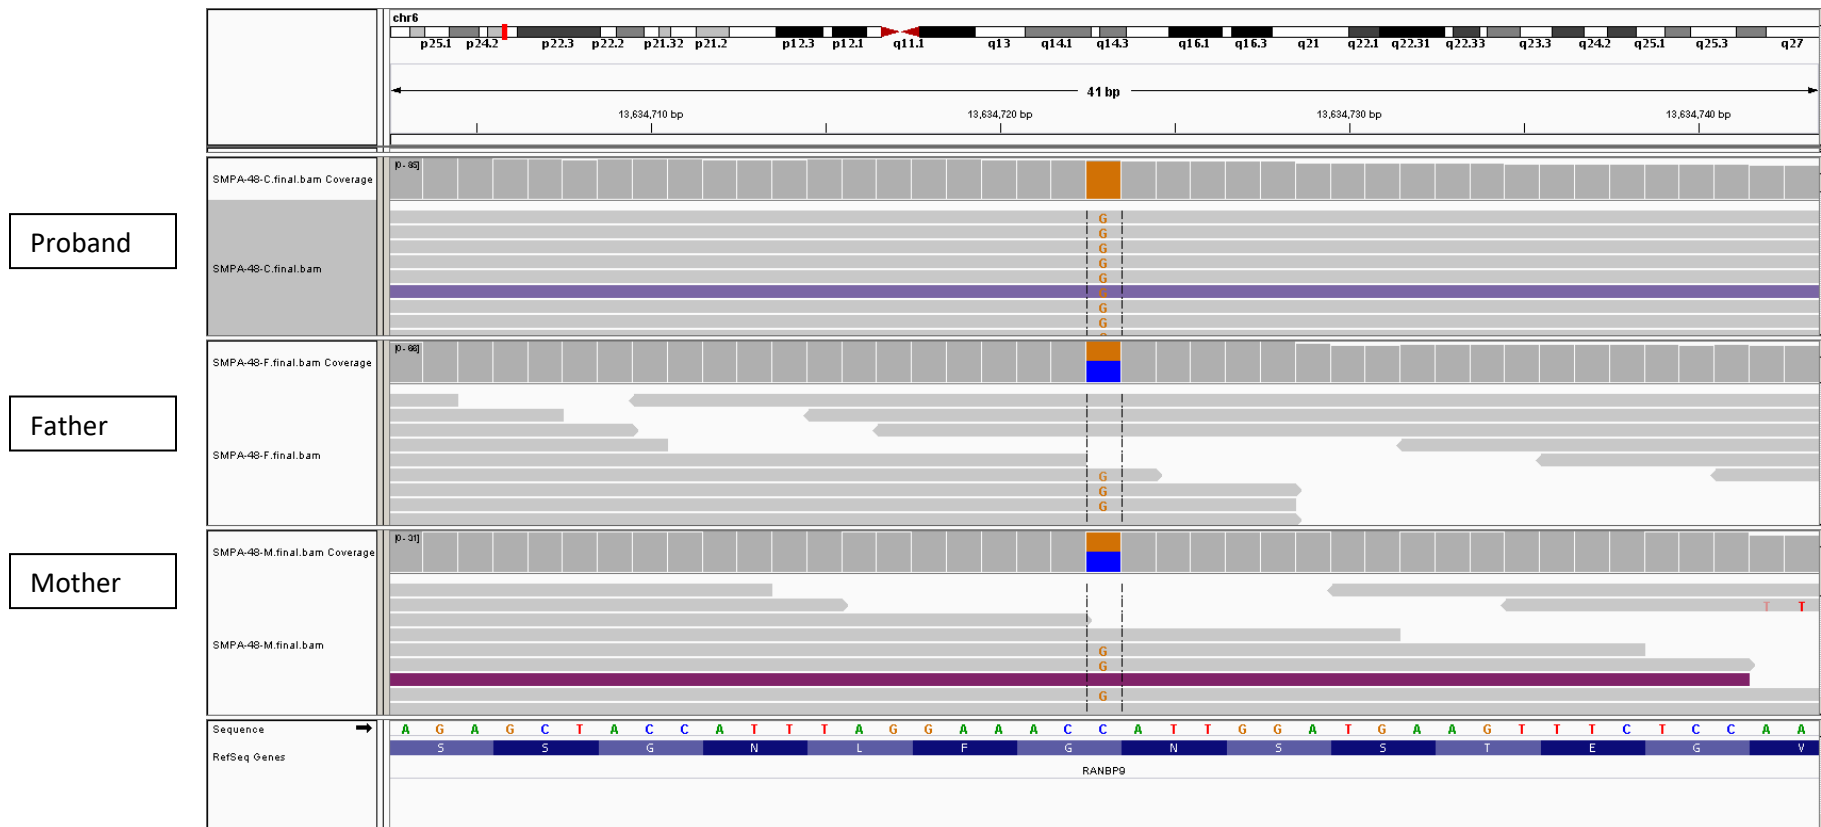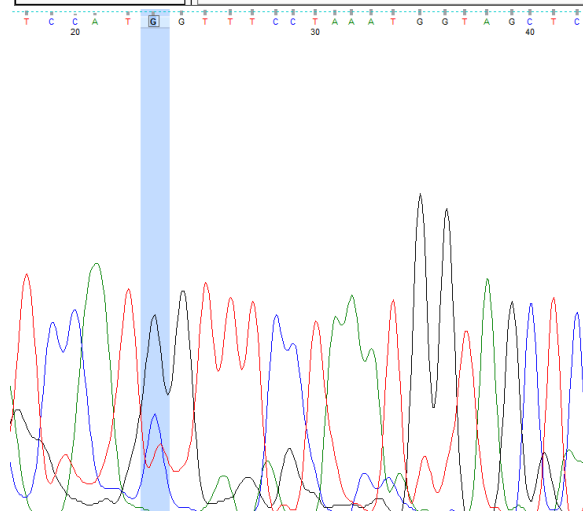

Mother (Father and proband DNA exhausted)

21. IAU80: *BTN3A2*

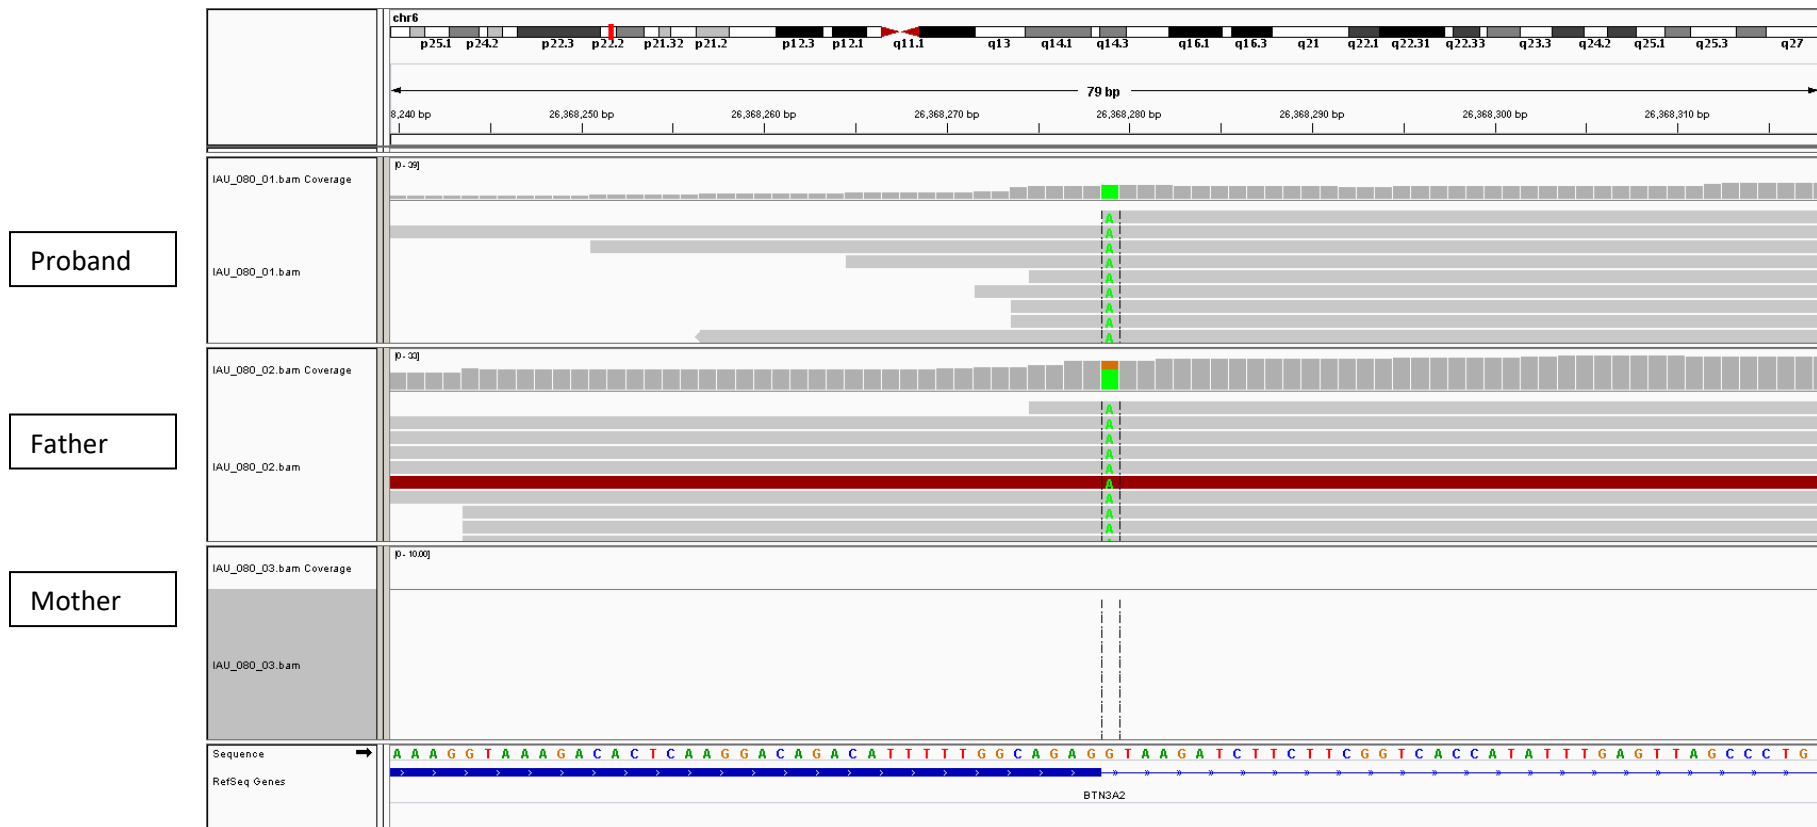

Unable to Sanger sequence due to high homology with orthologues.

22. IABBS: *DNAH8*

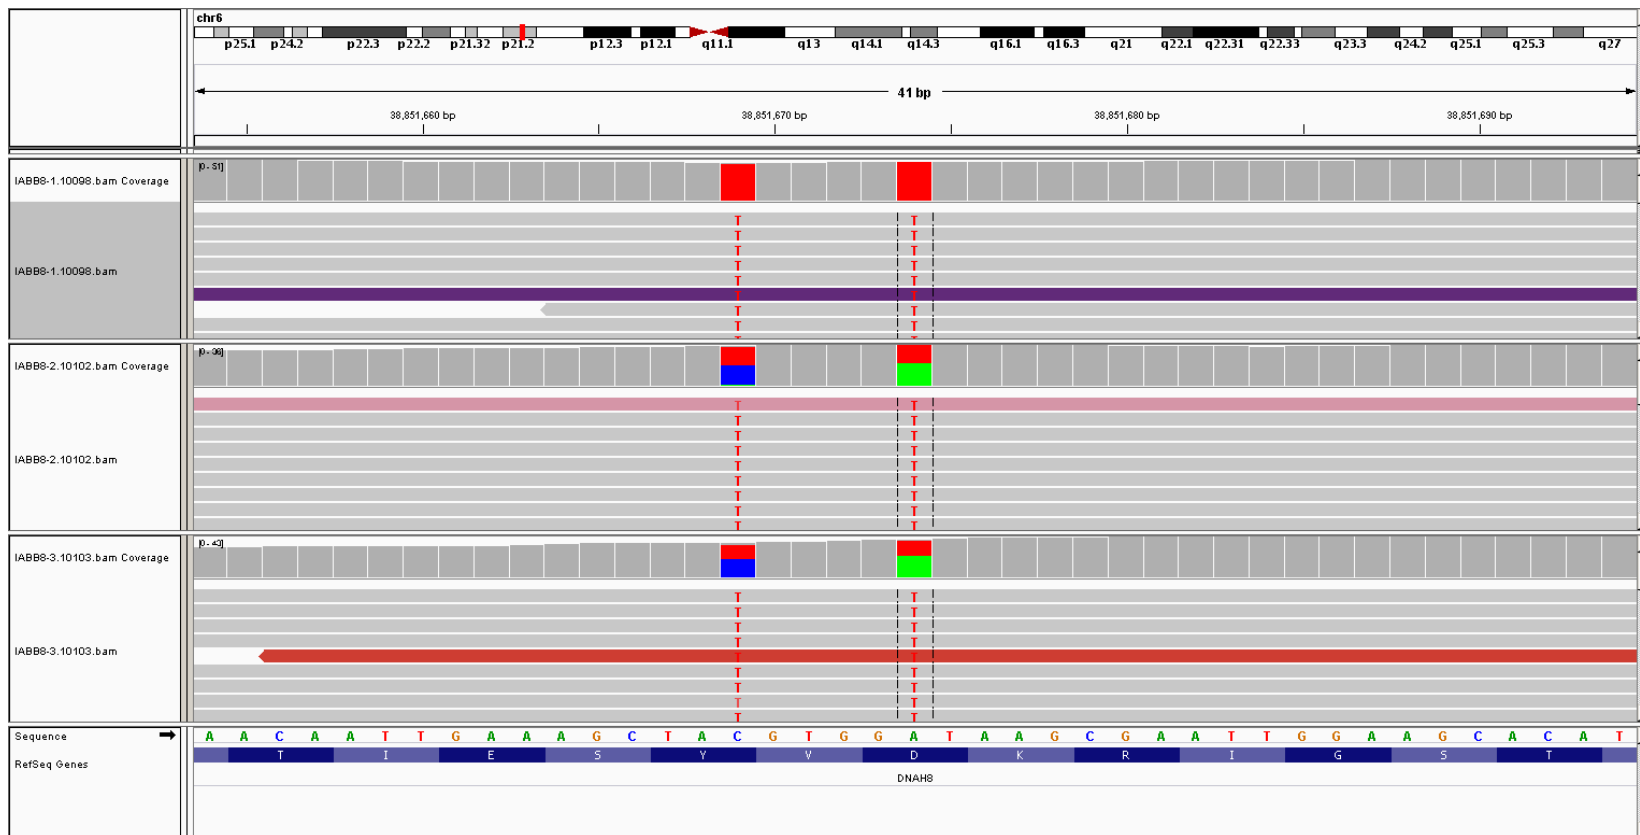

Proband

Father

Mother

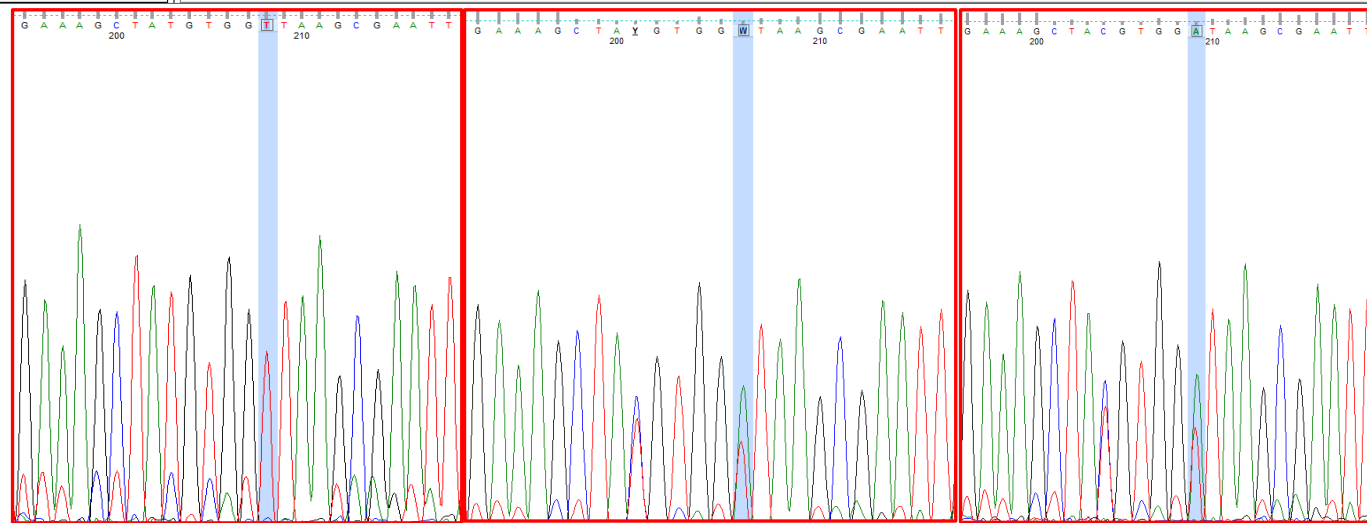

Proband

Father

Mother

23. Autism9: WDR27

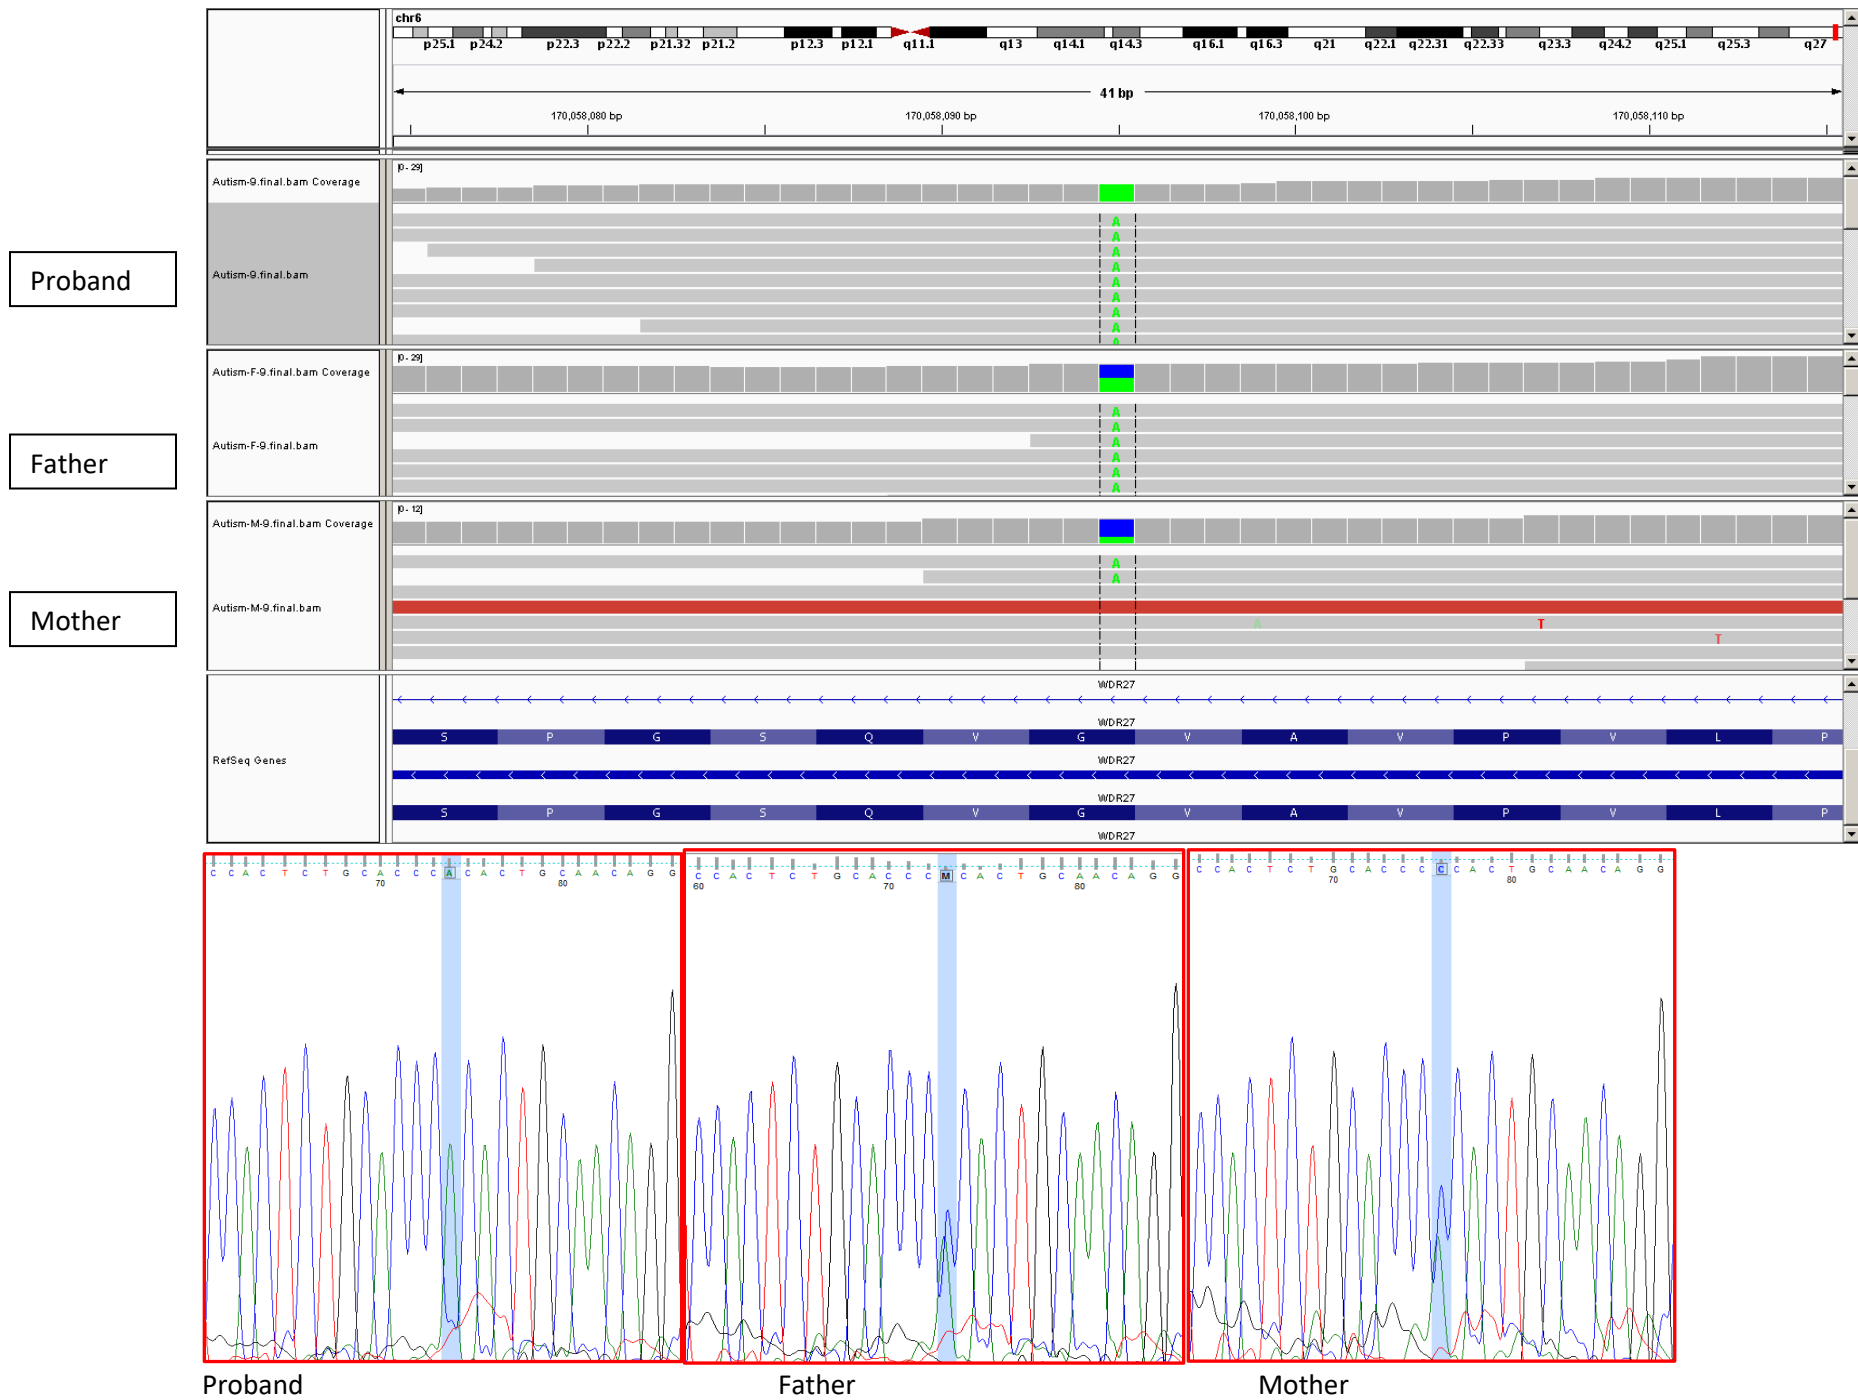

24. IAU7: PKD1L1

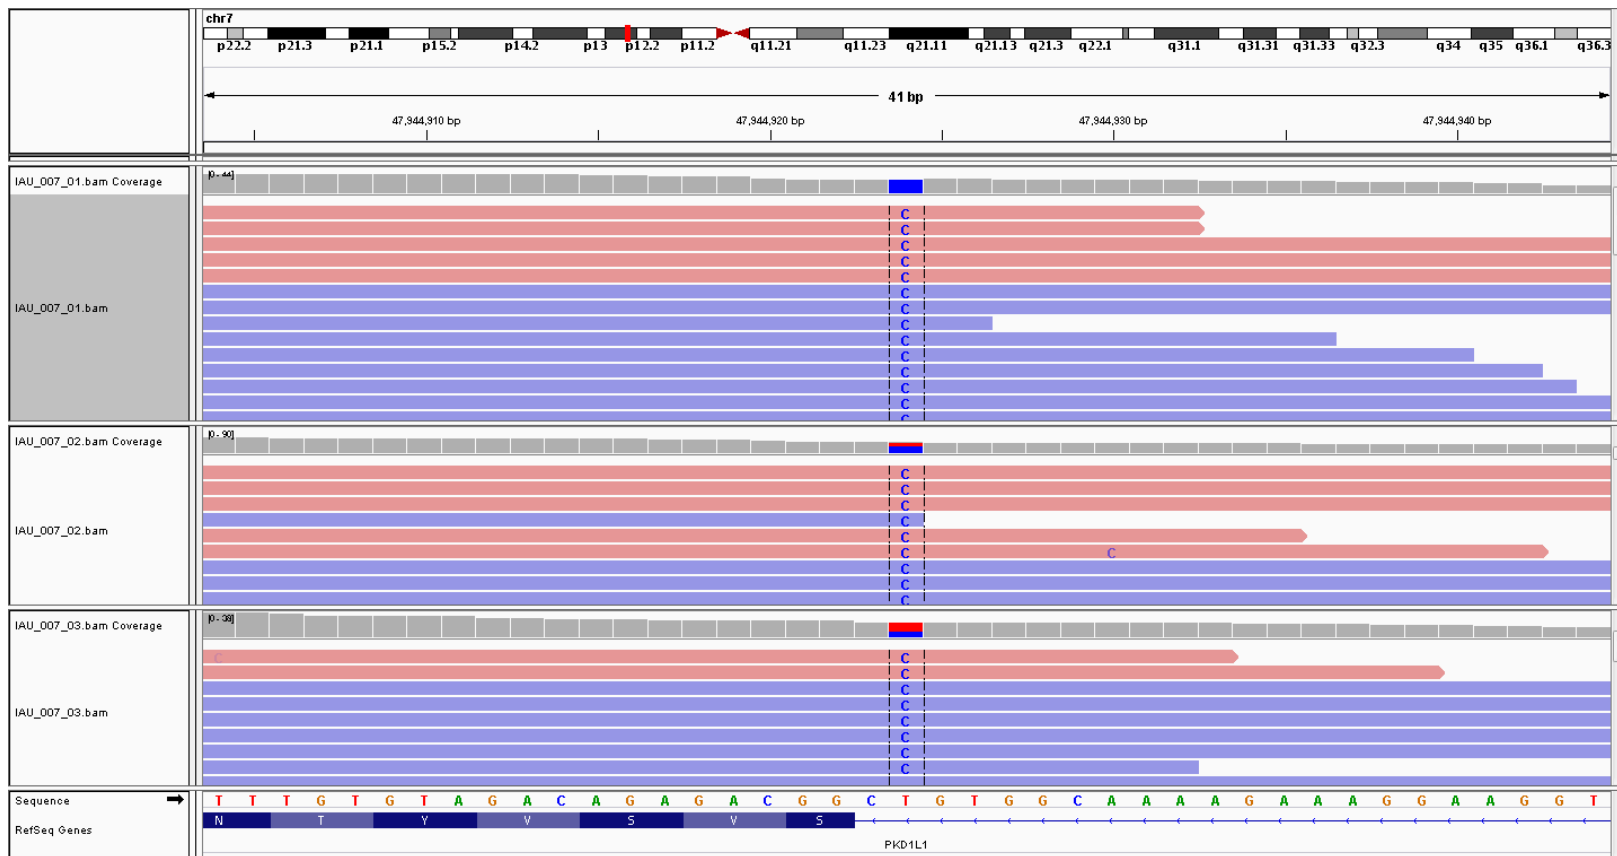

Proband

Father

Mother

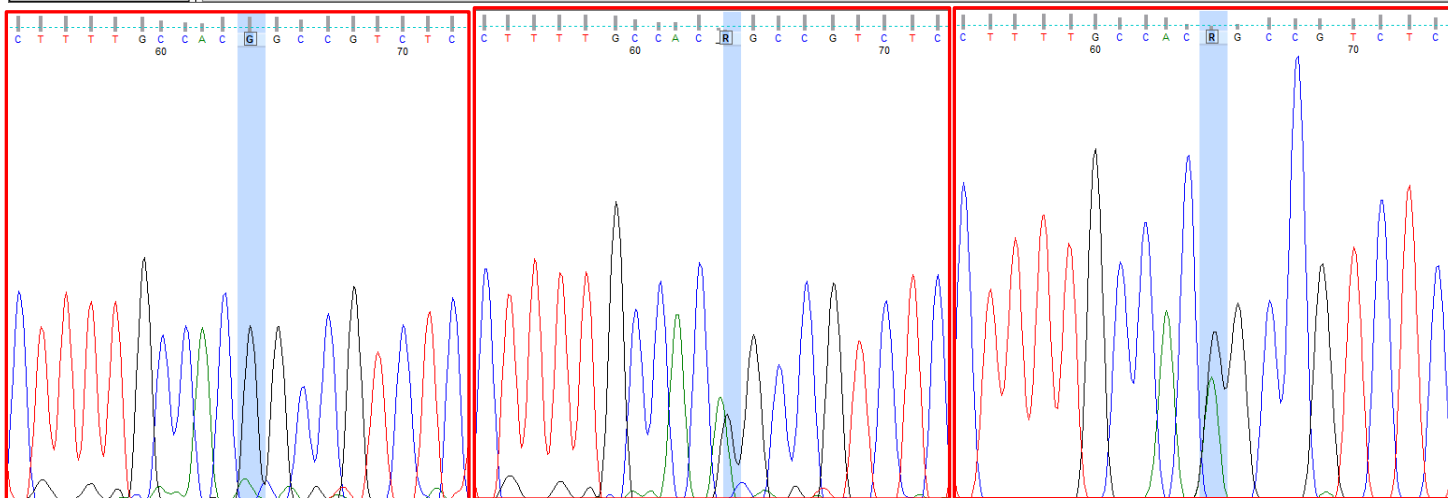

Proband

Father

Mother



25. SA7: ASL

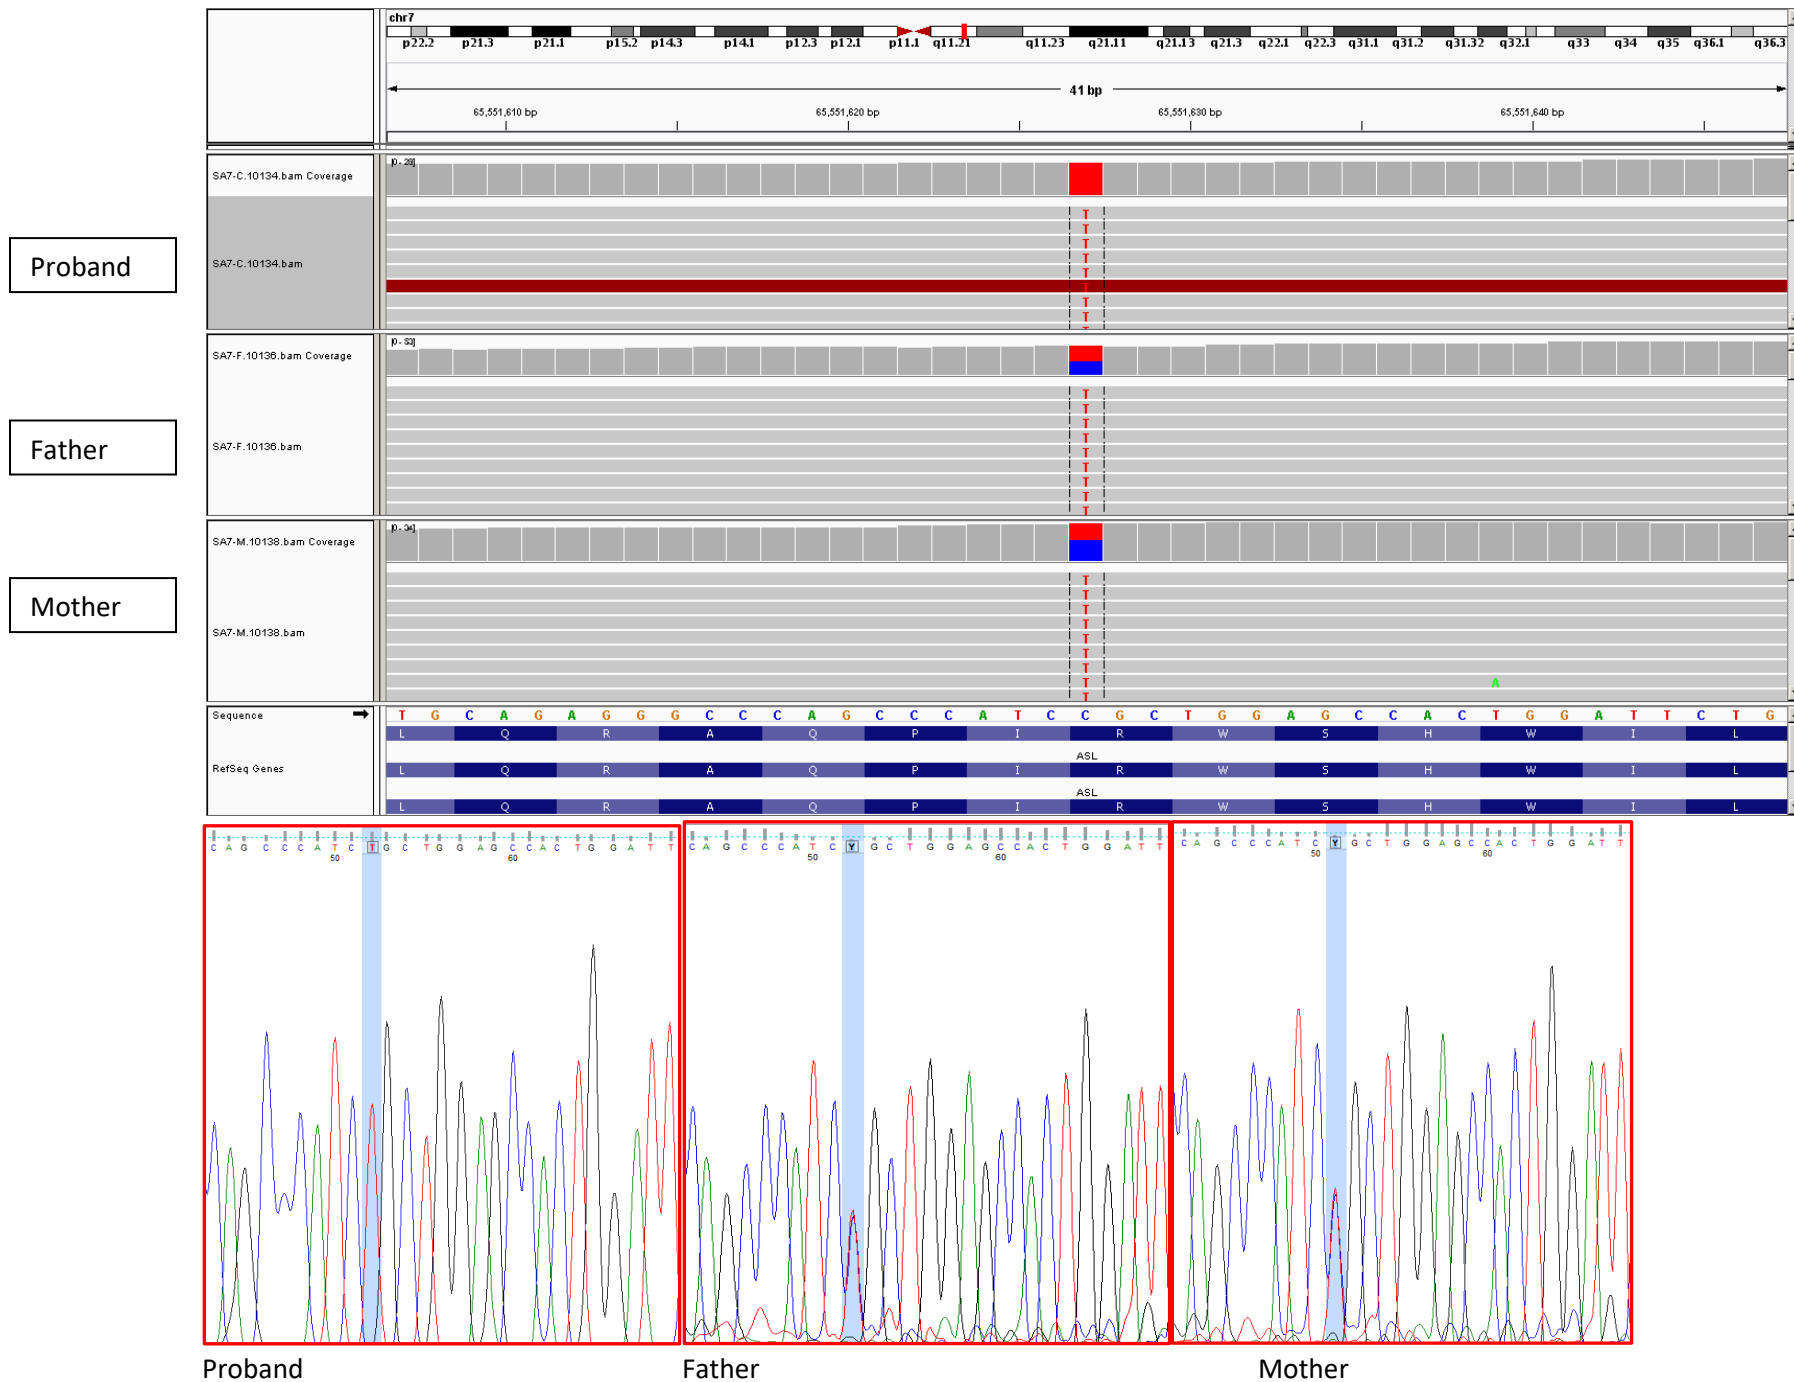

26. IABB7: CNPY4

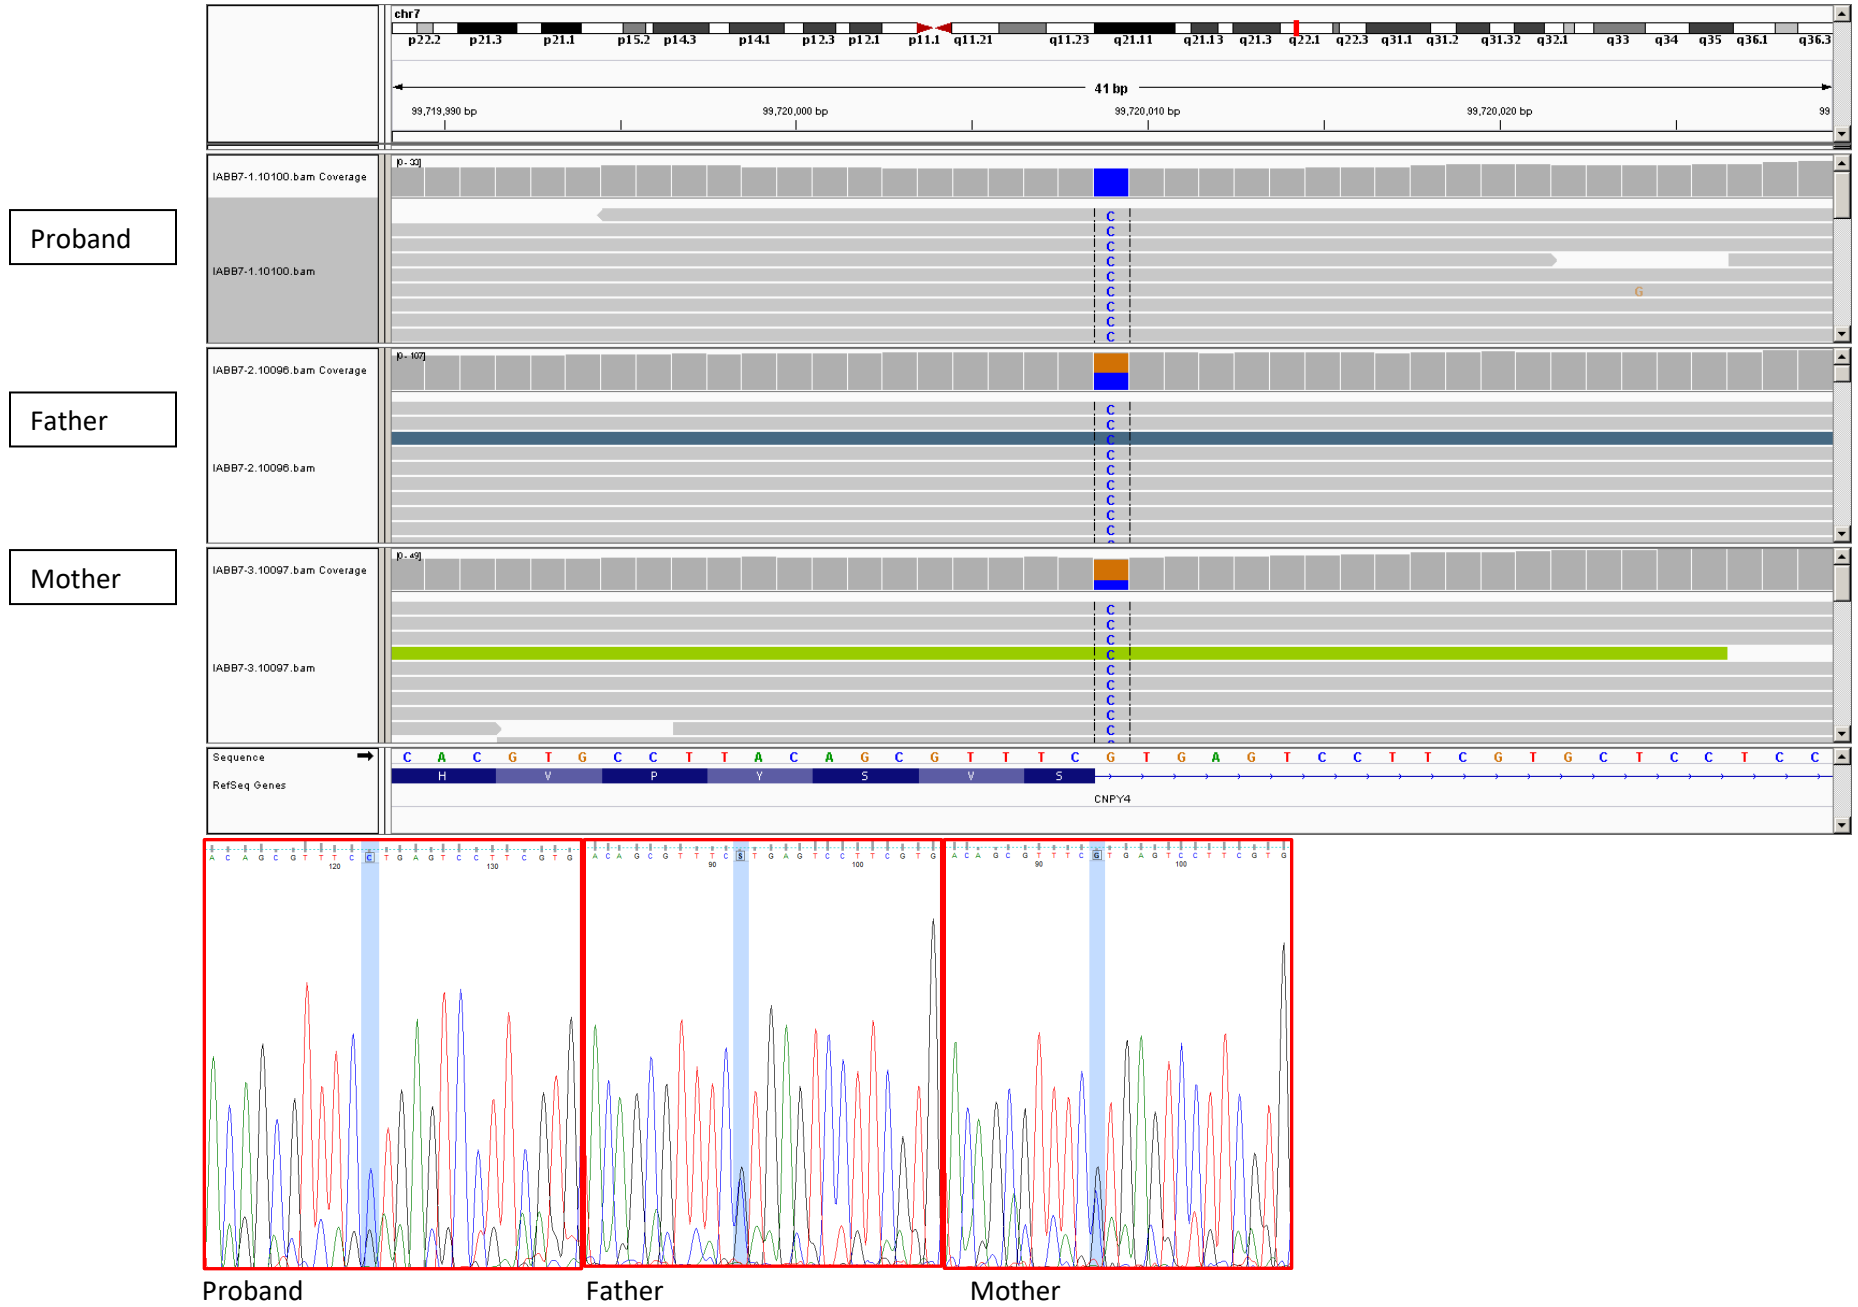

27. IAU79: *GIMAP8*

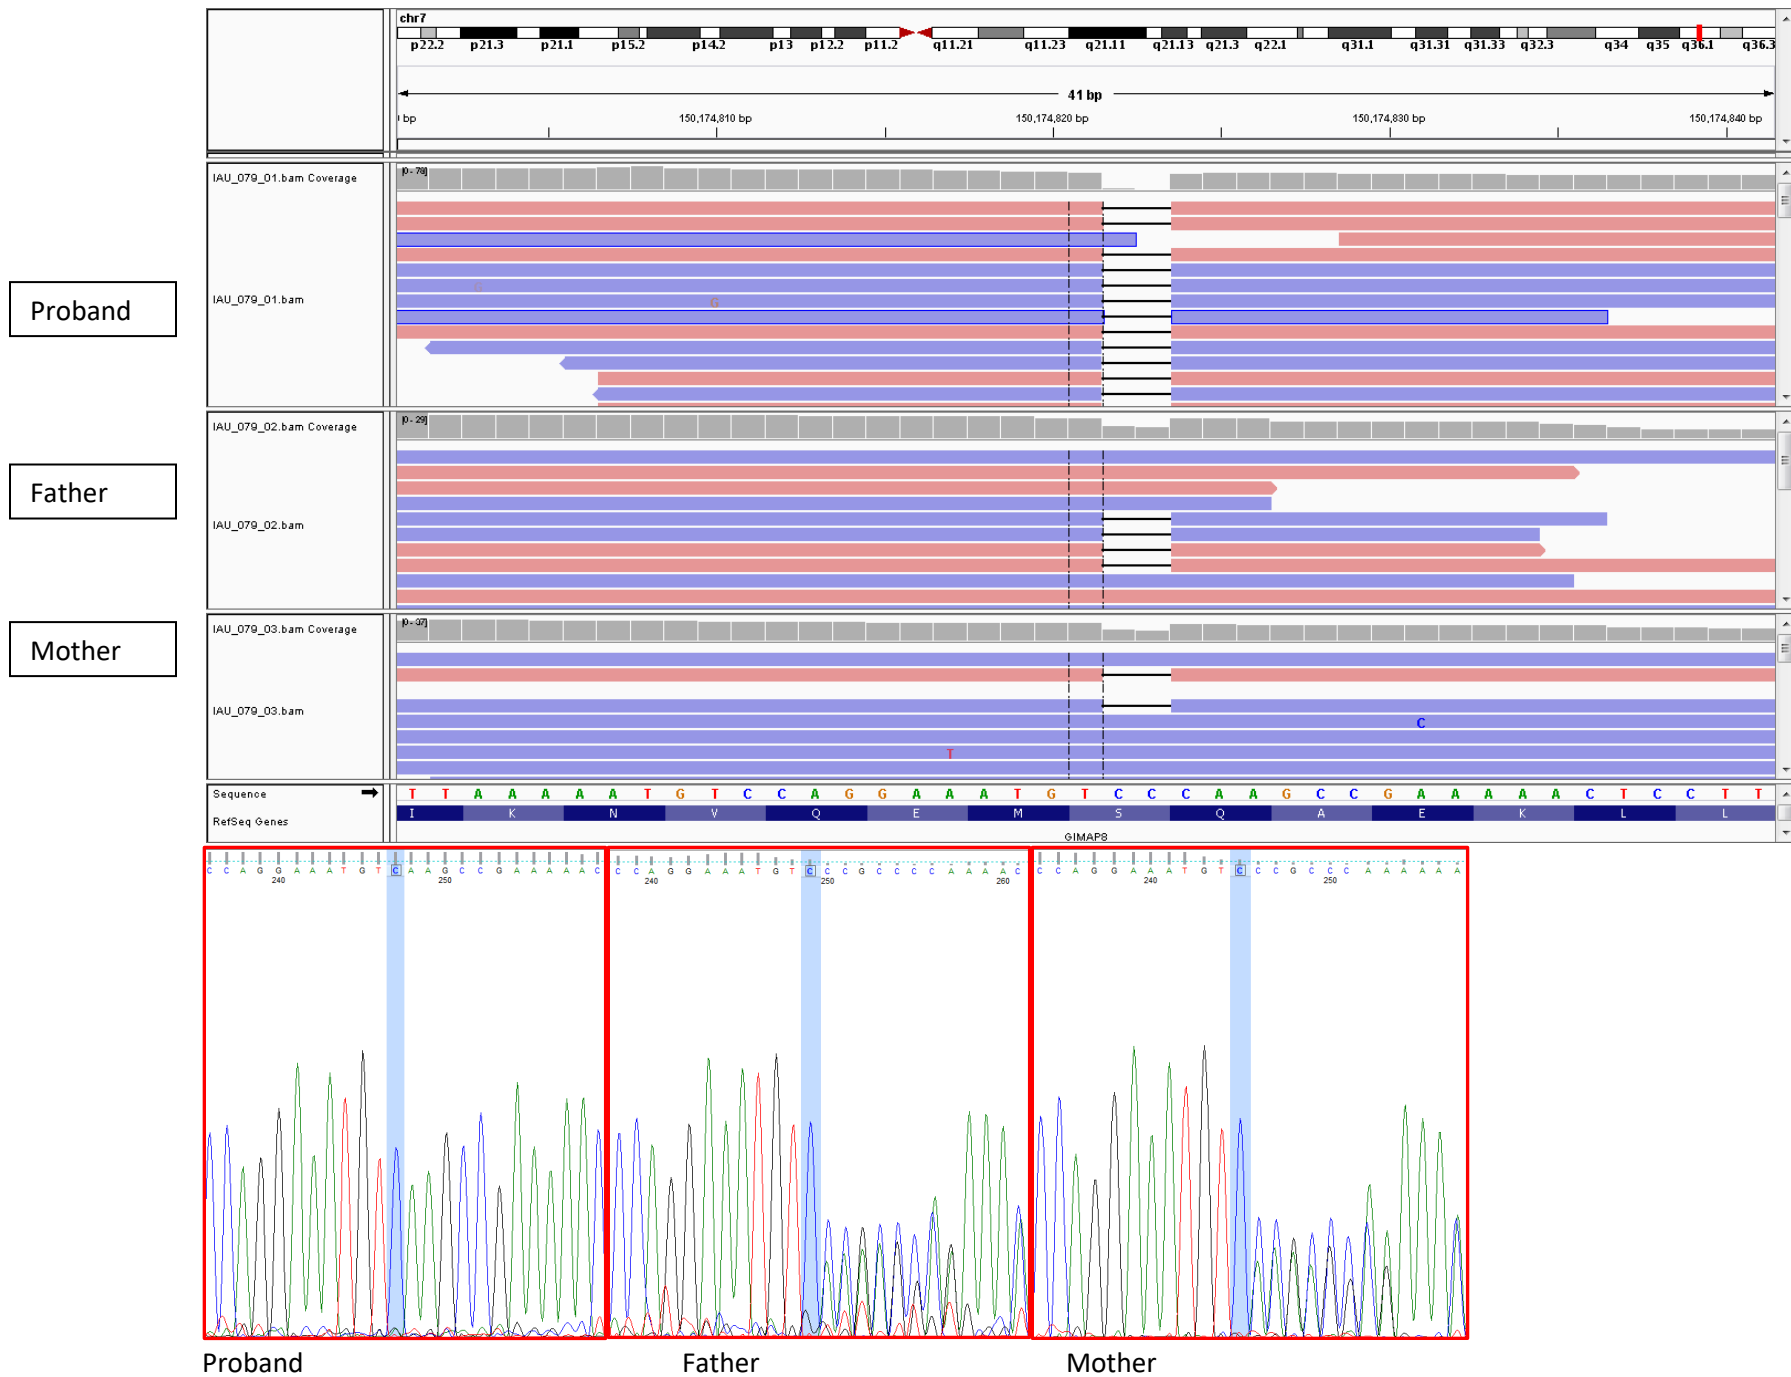

28. SMPA11: SHH

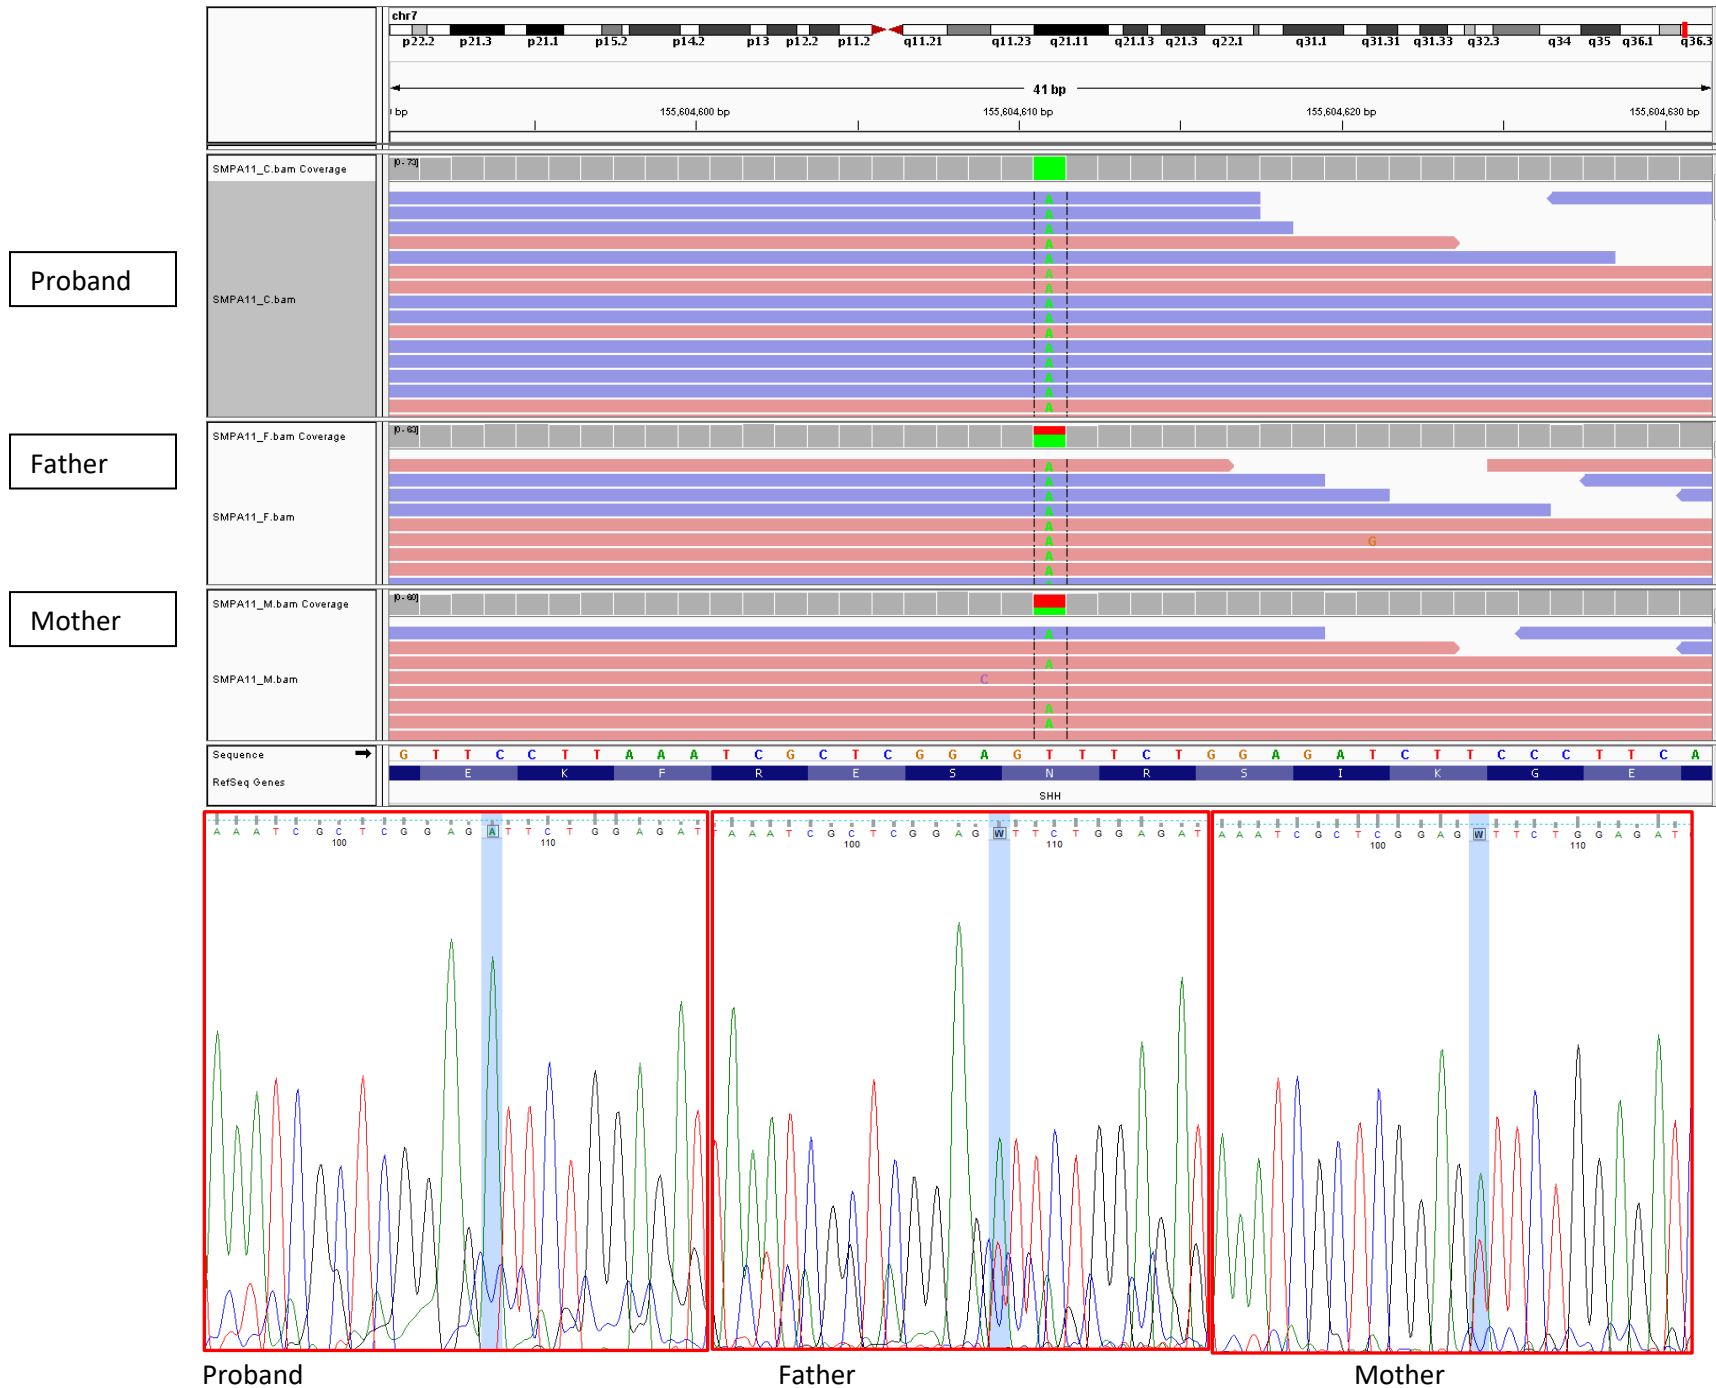

29. IABB3: VPS13B

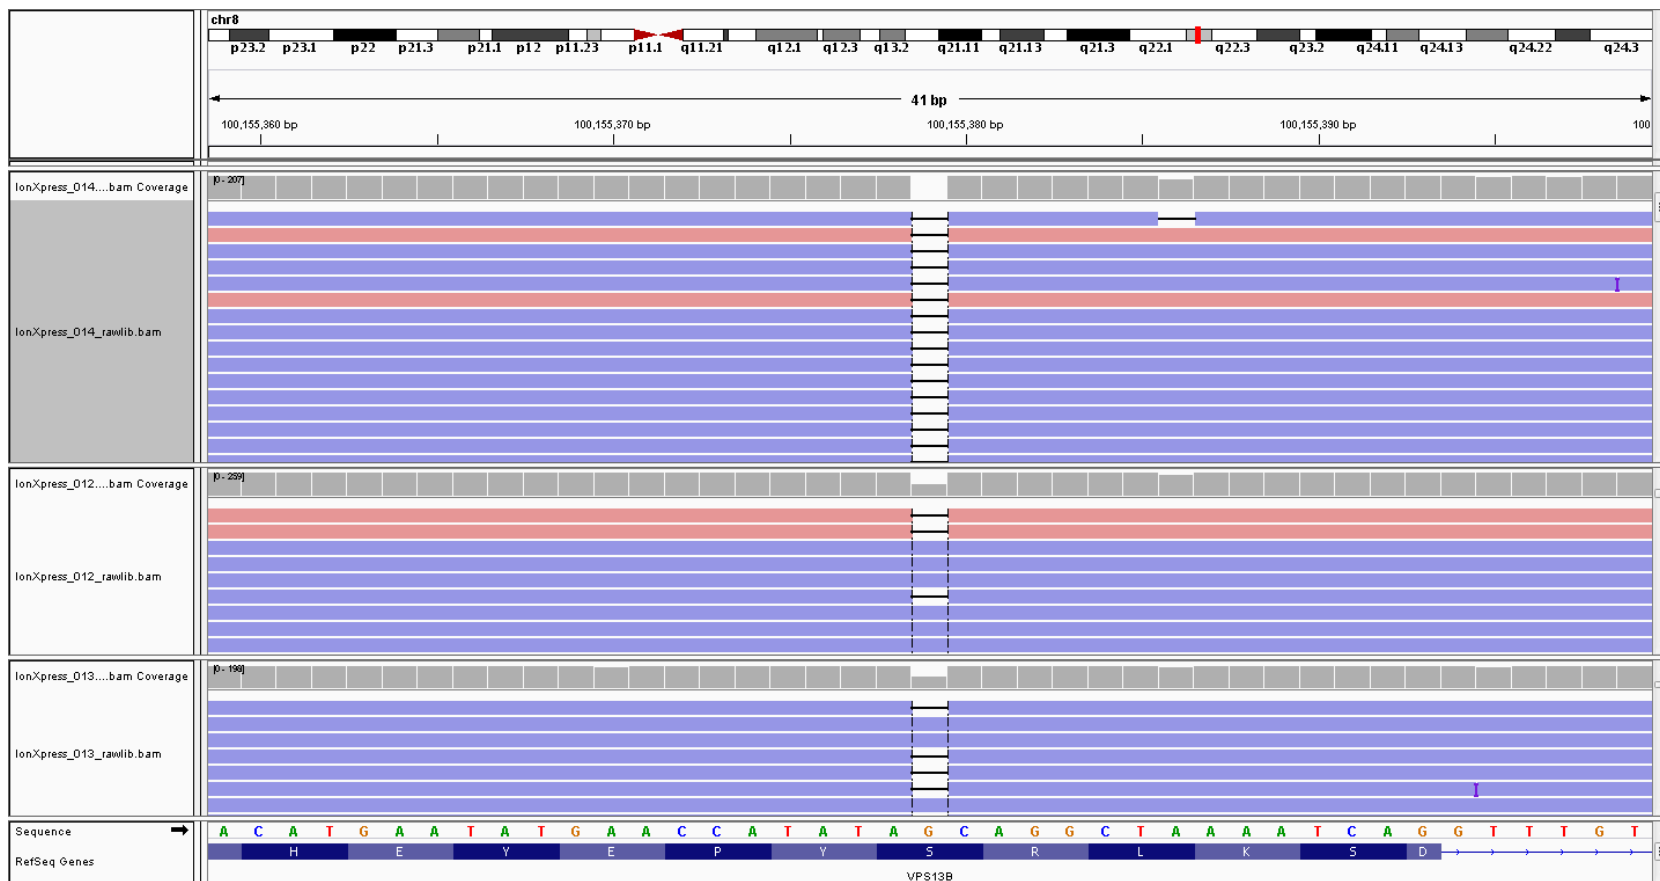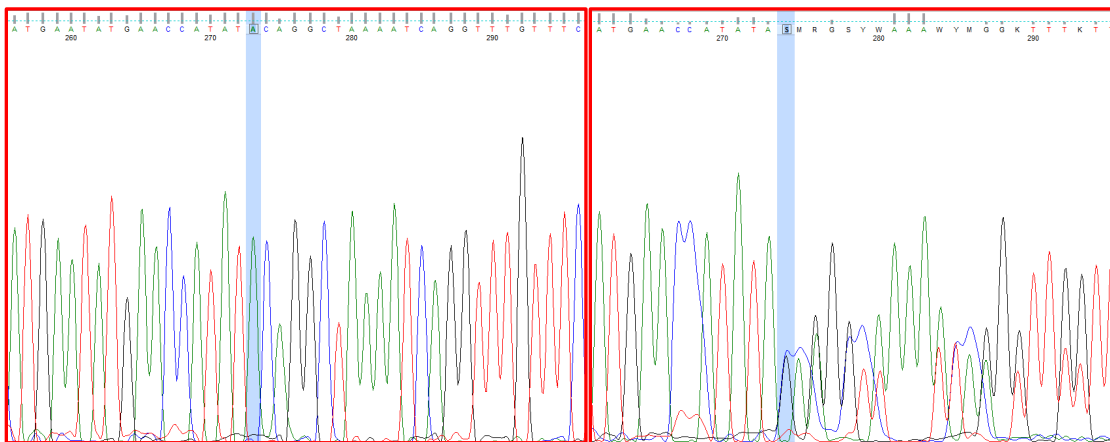

Proband

Mother

30. SA4: *ERMP1*

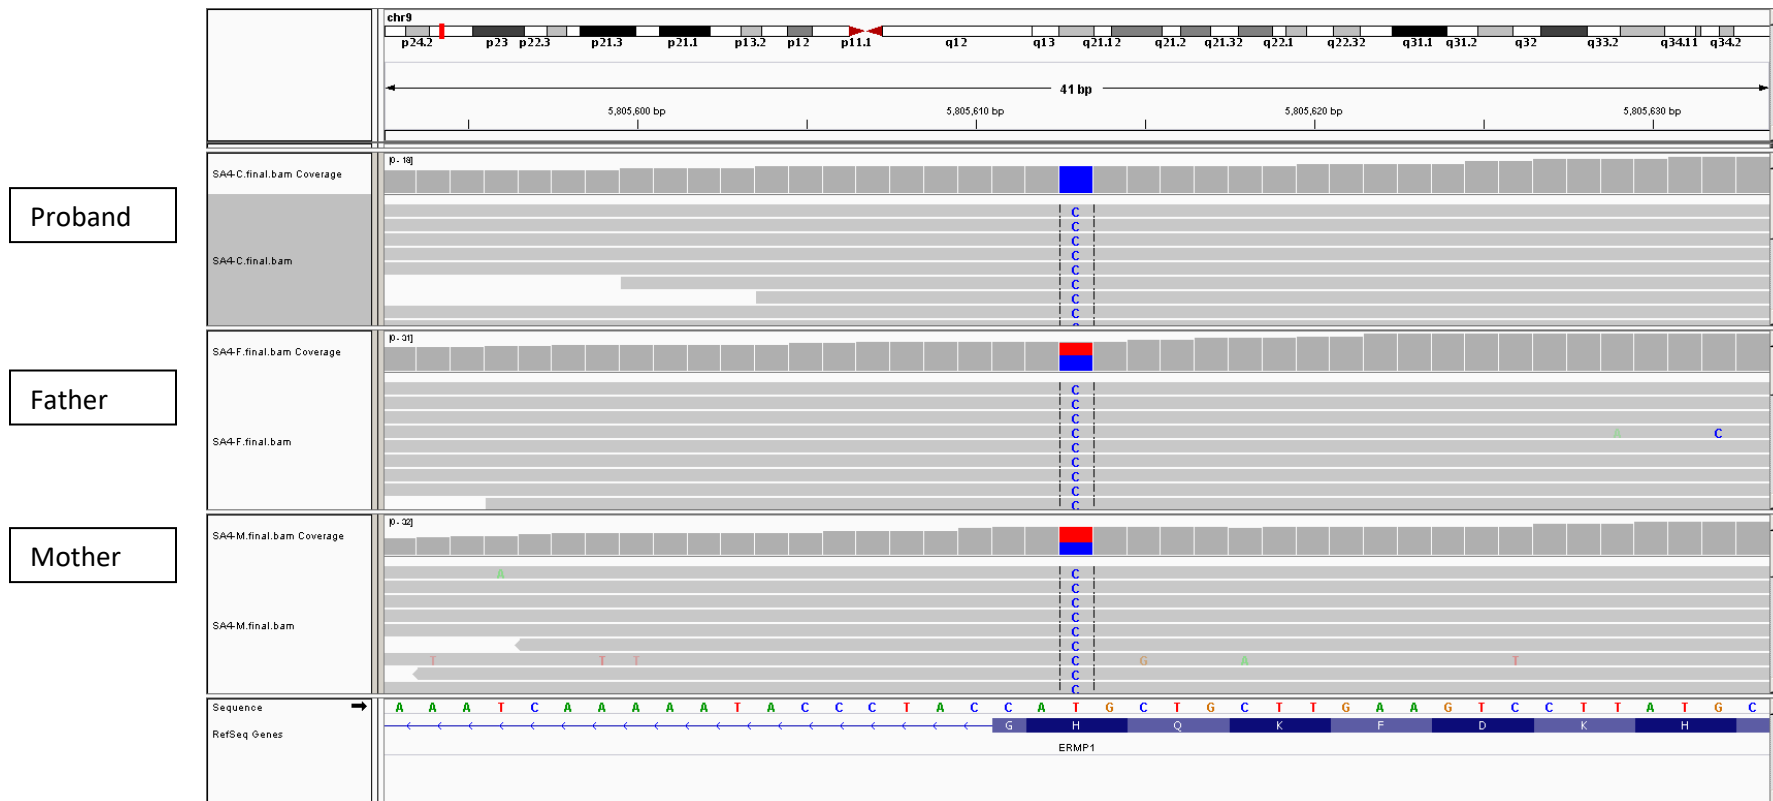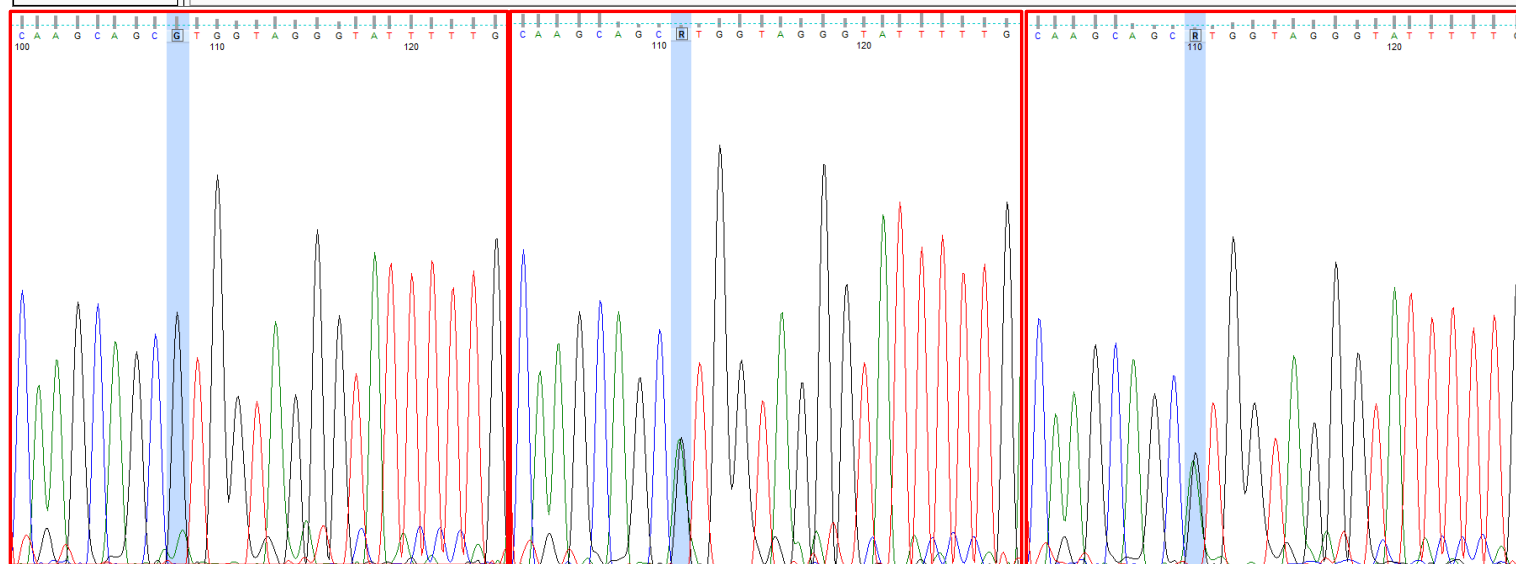

Proband

Father

Mother

31. IABB2: DEAF1

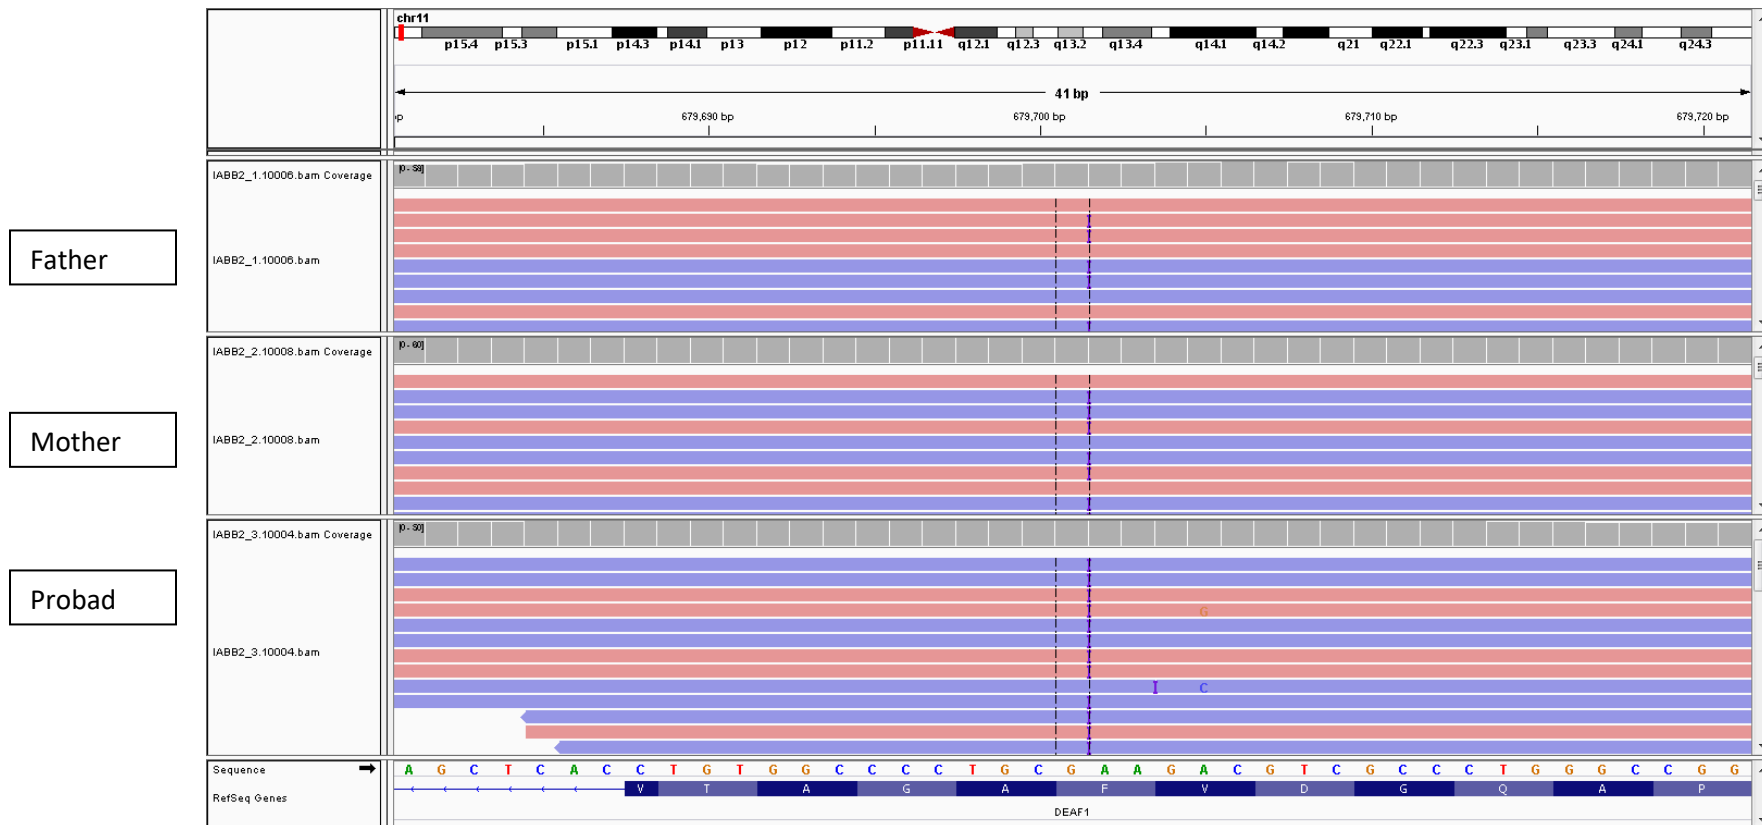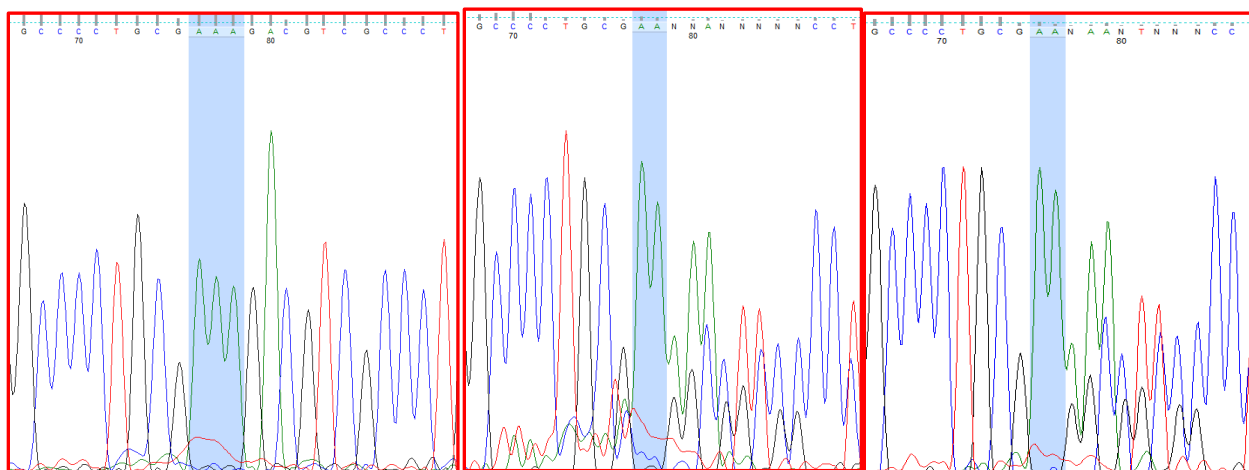

Proband

Father

Mother

32. SMPA11: *TRIM3*

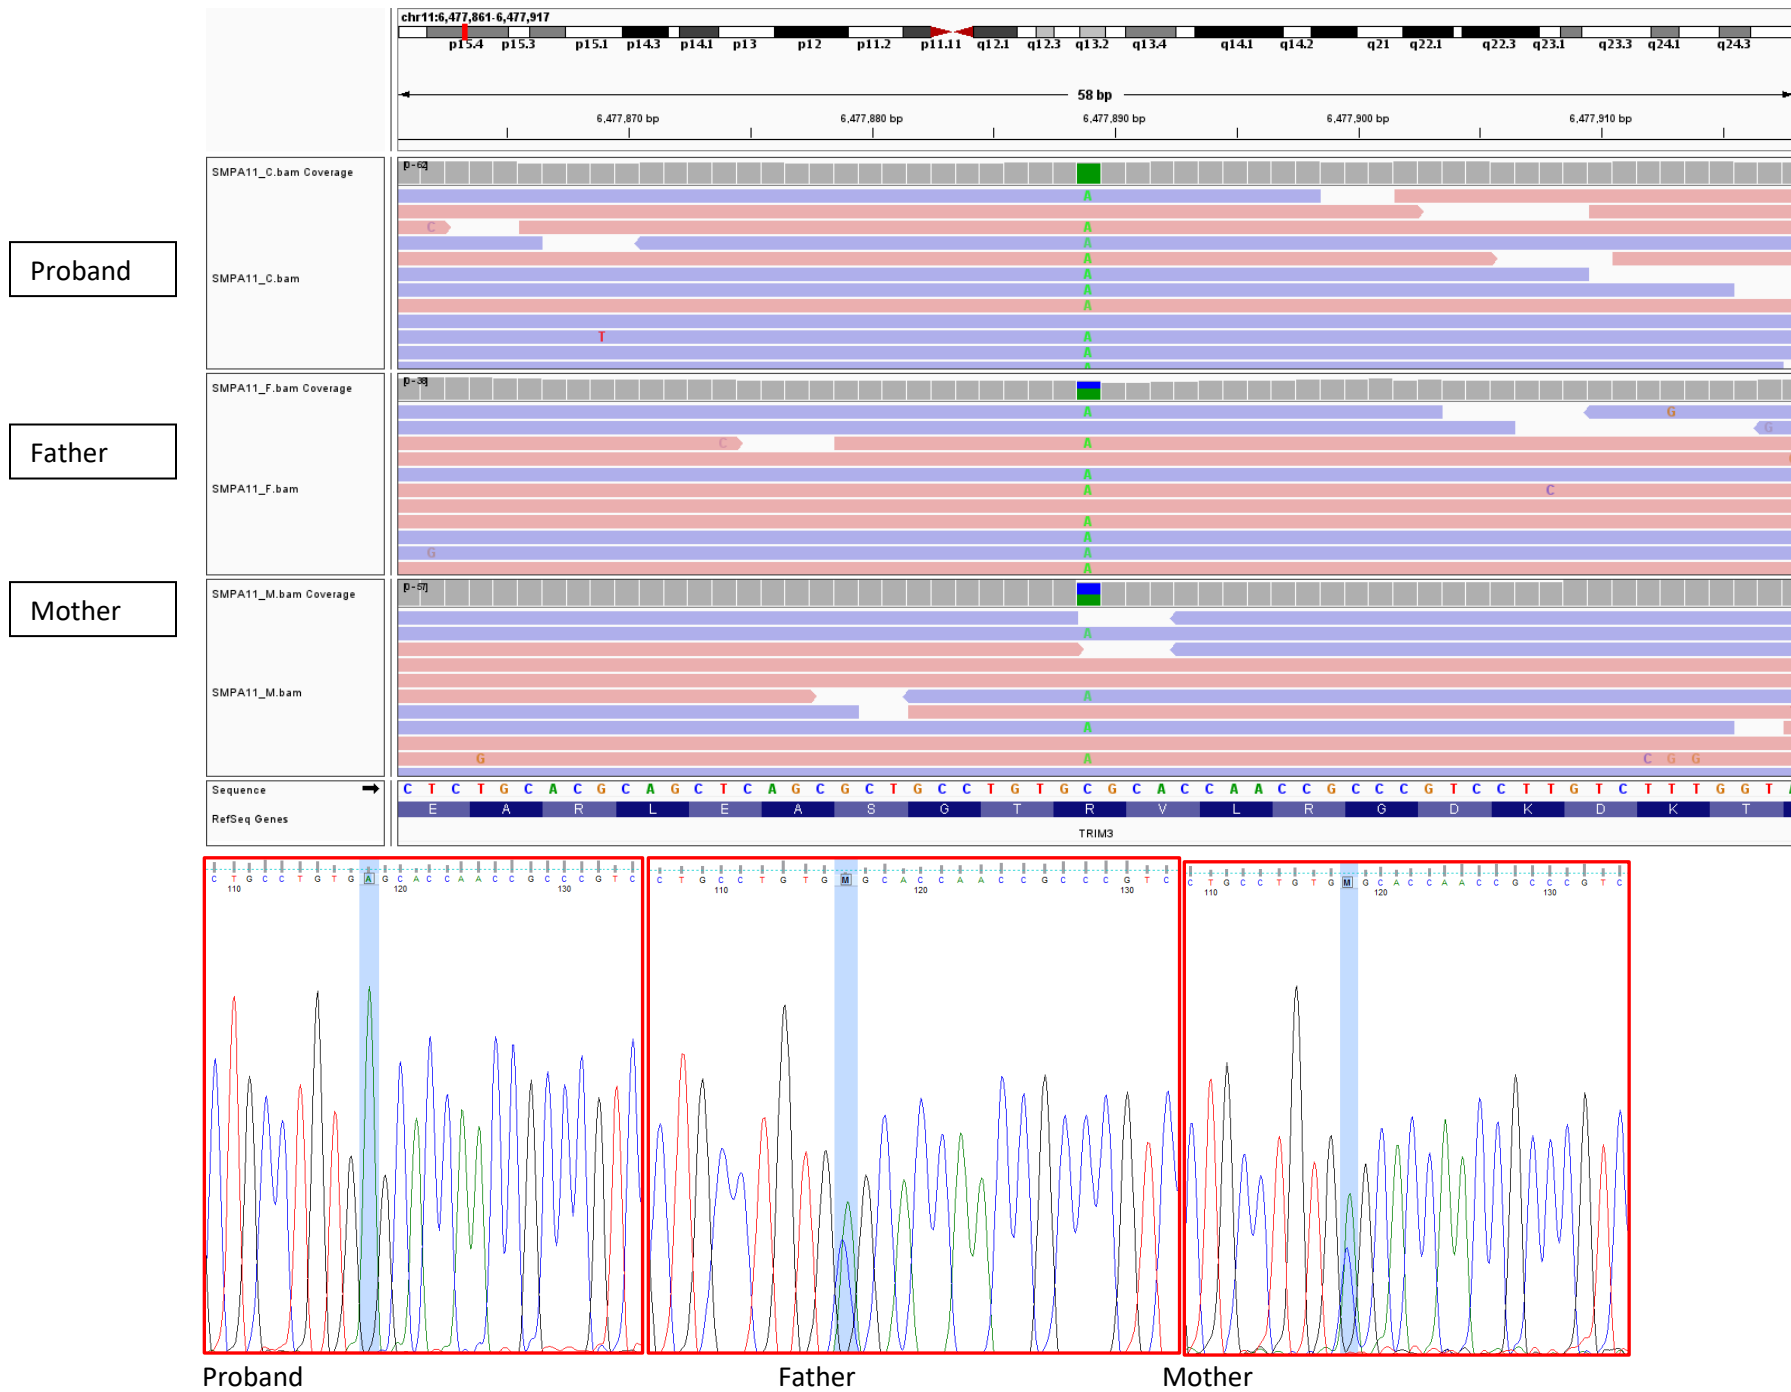



33. SMPA20: MADD

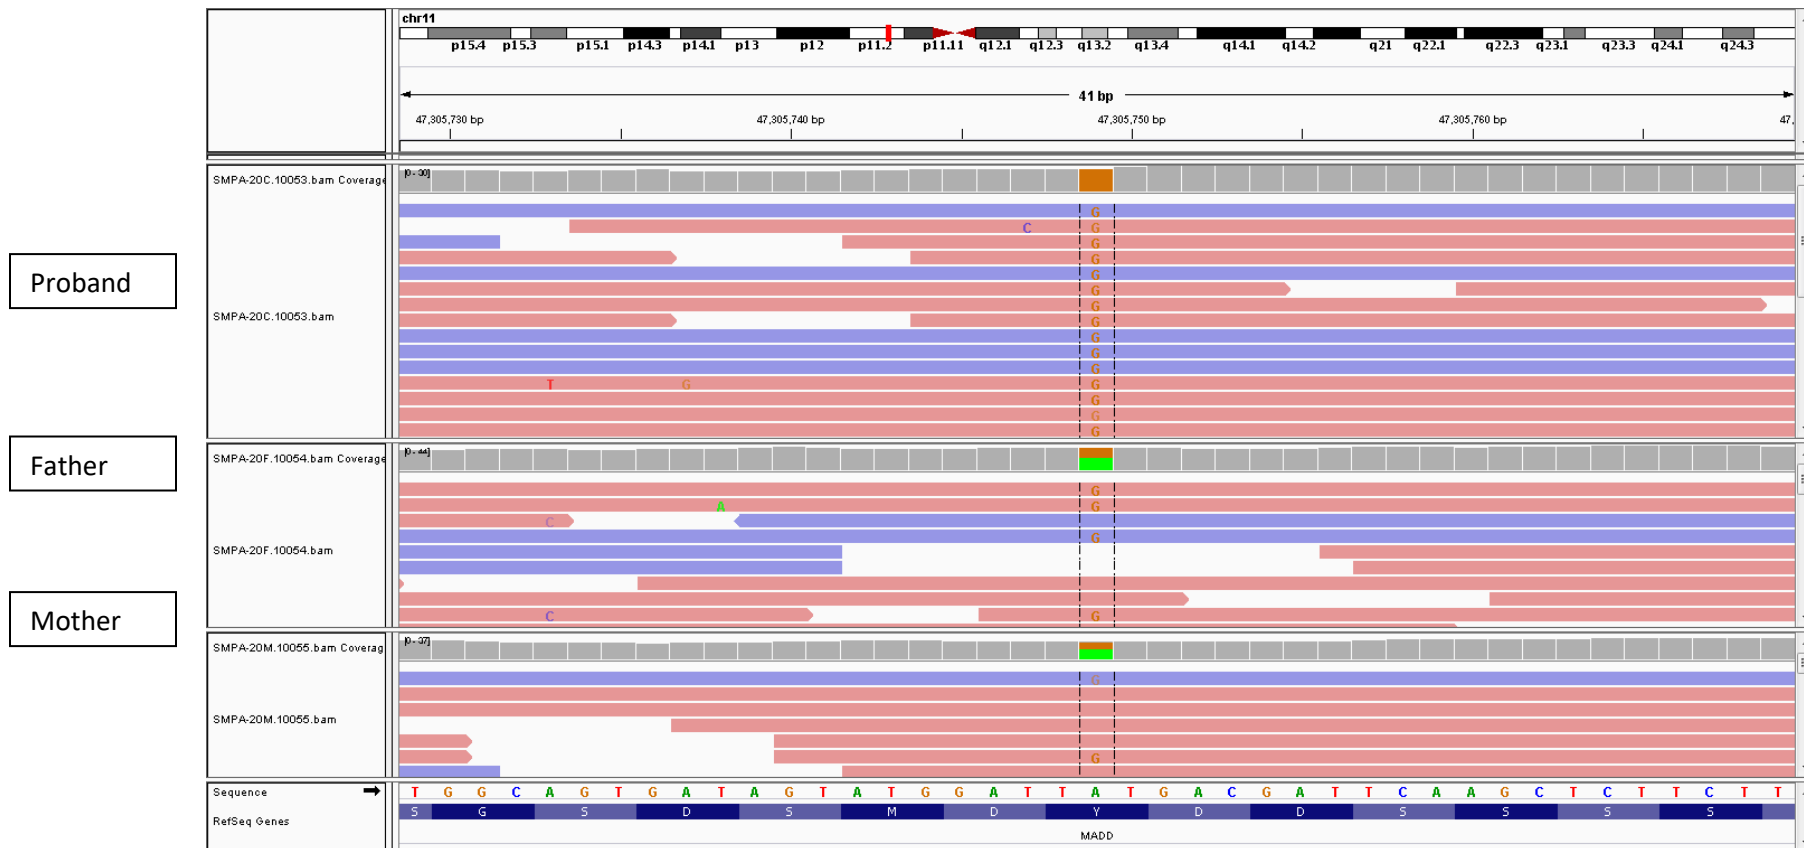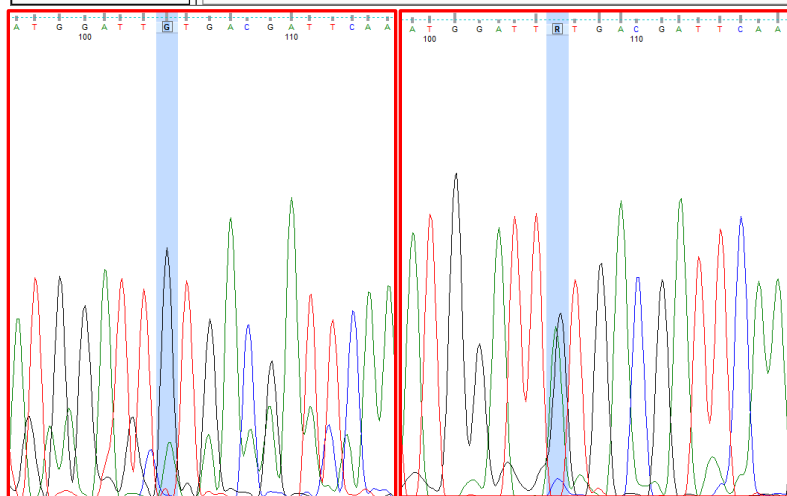

Proband

Father

34. SMPA21: *DAGLA*

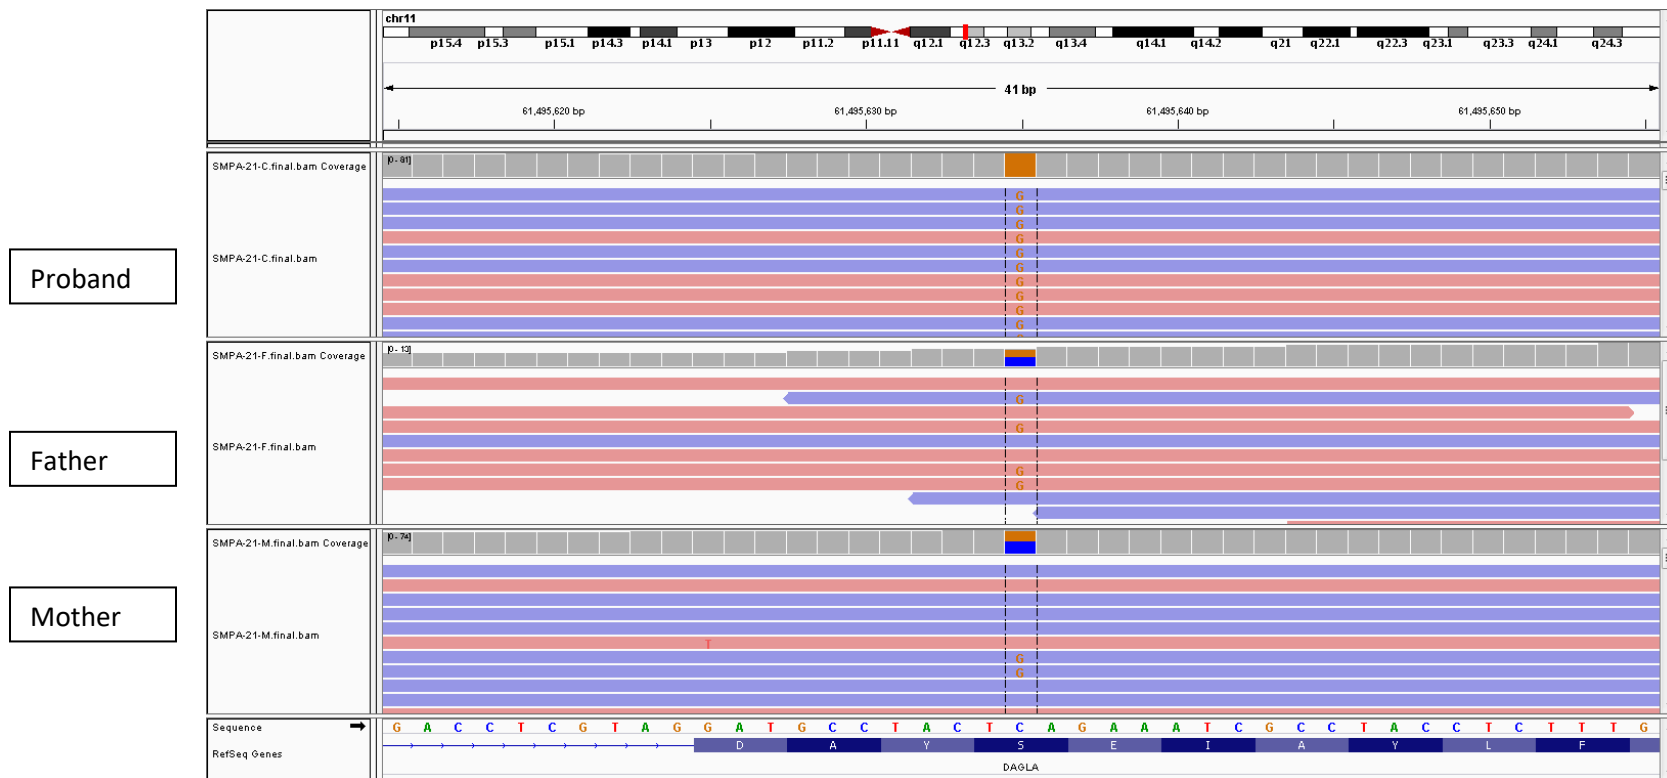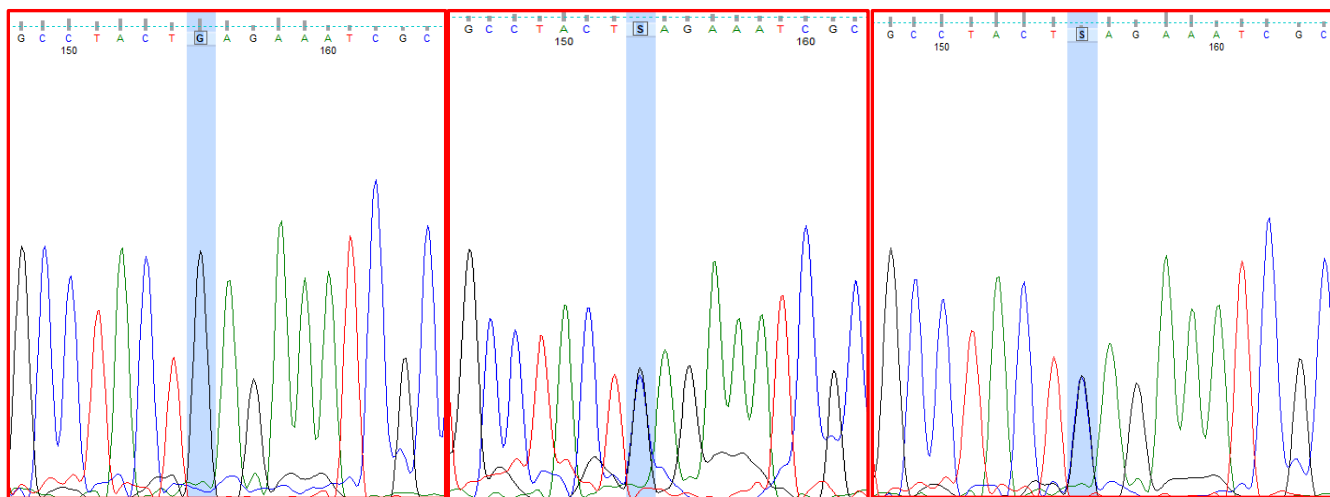

Proband

Father

Mother

35. SMPA80: CABP2

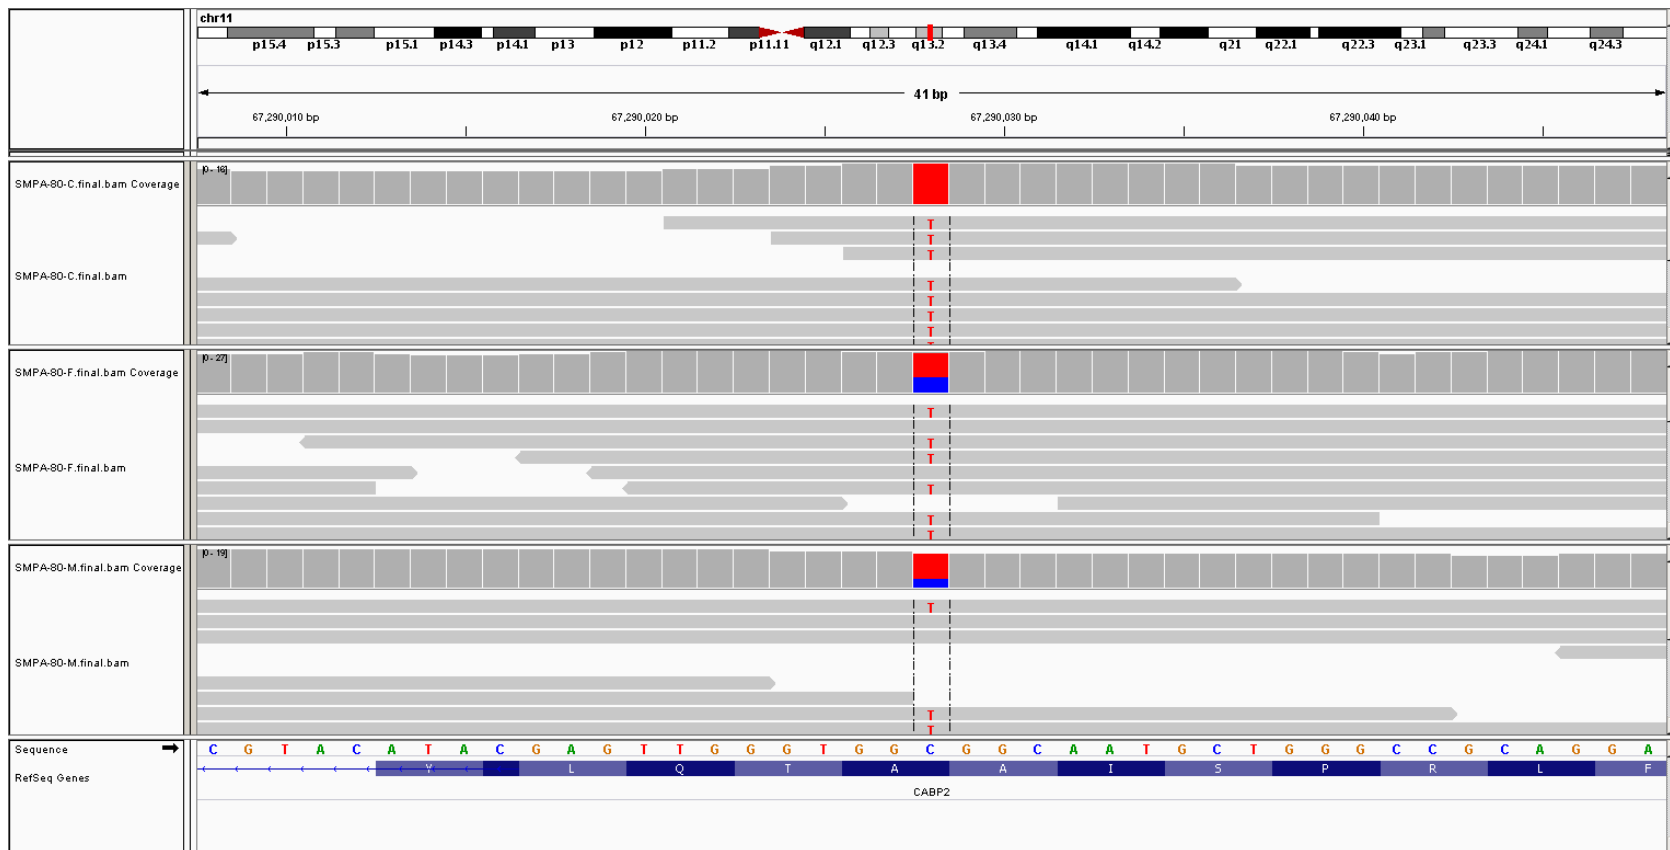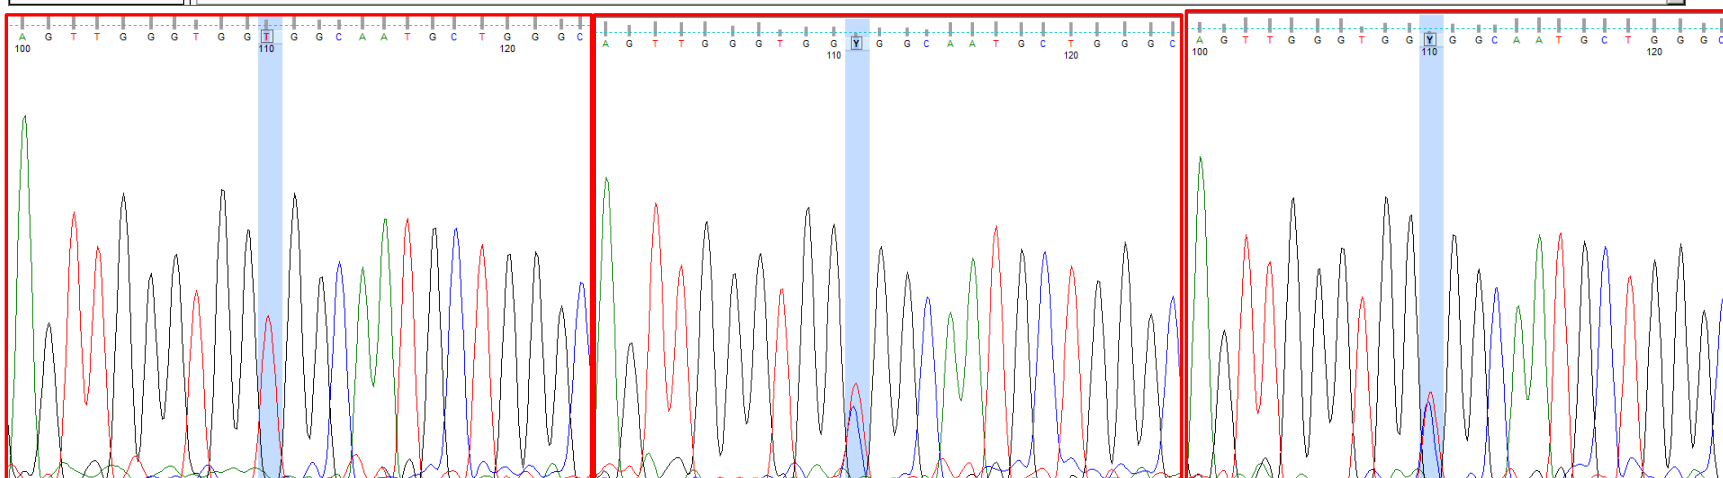

Proband

Father

Mother

36. SMPA8: *TMEM25*

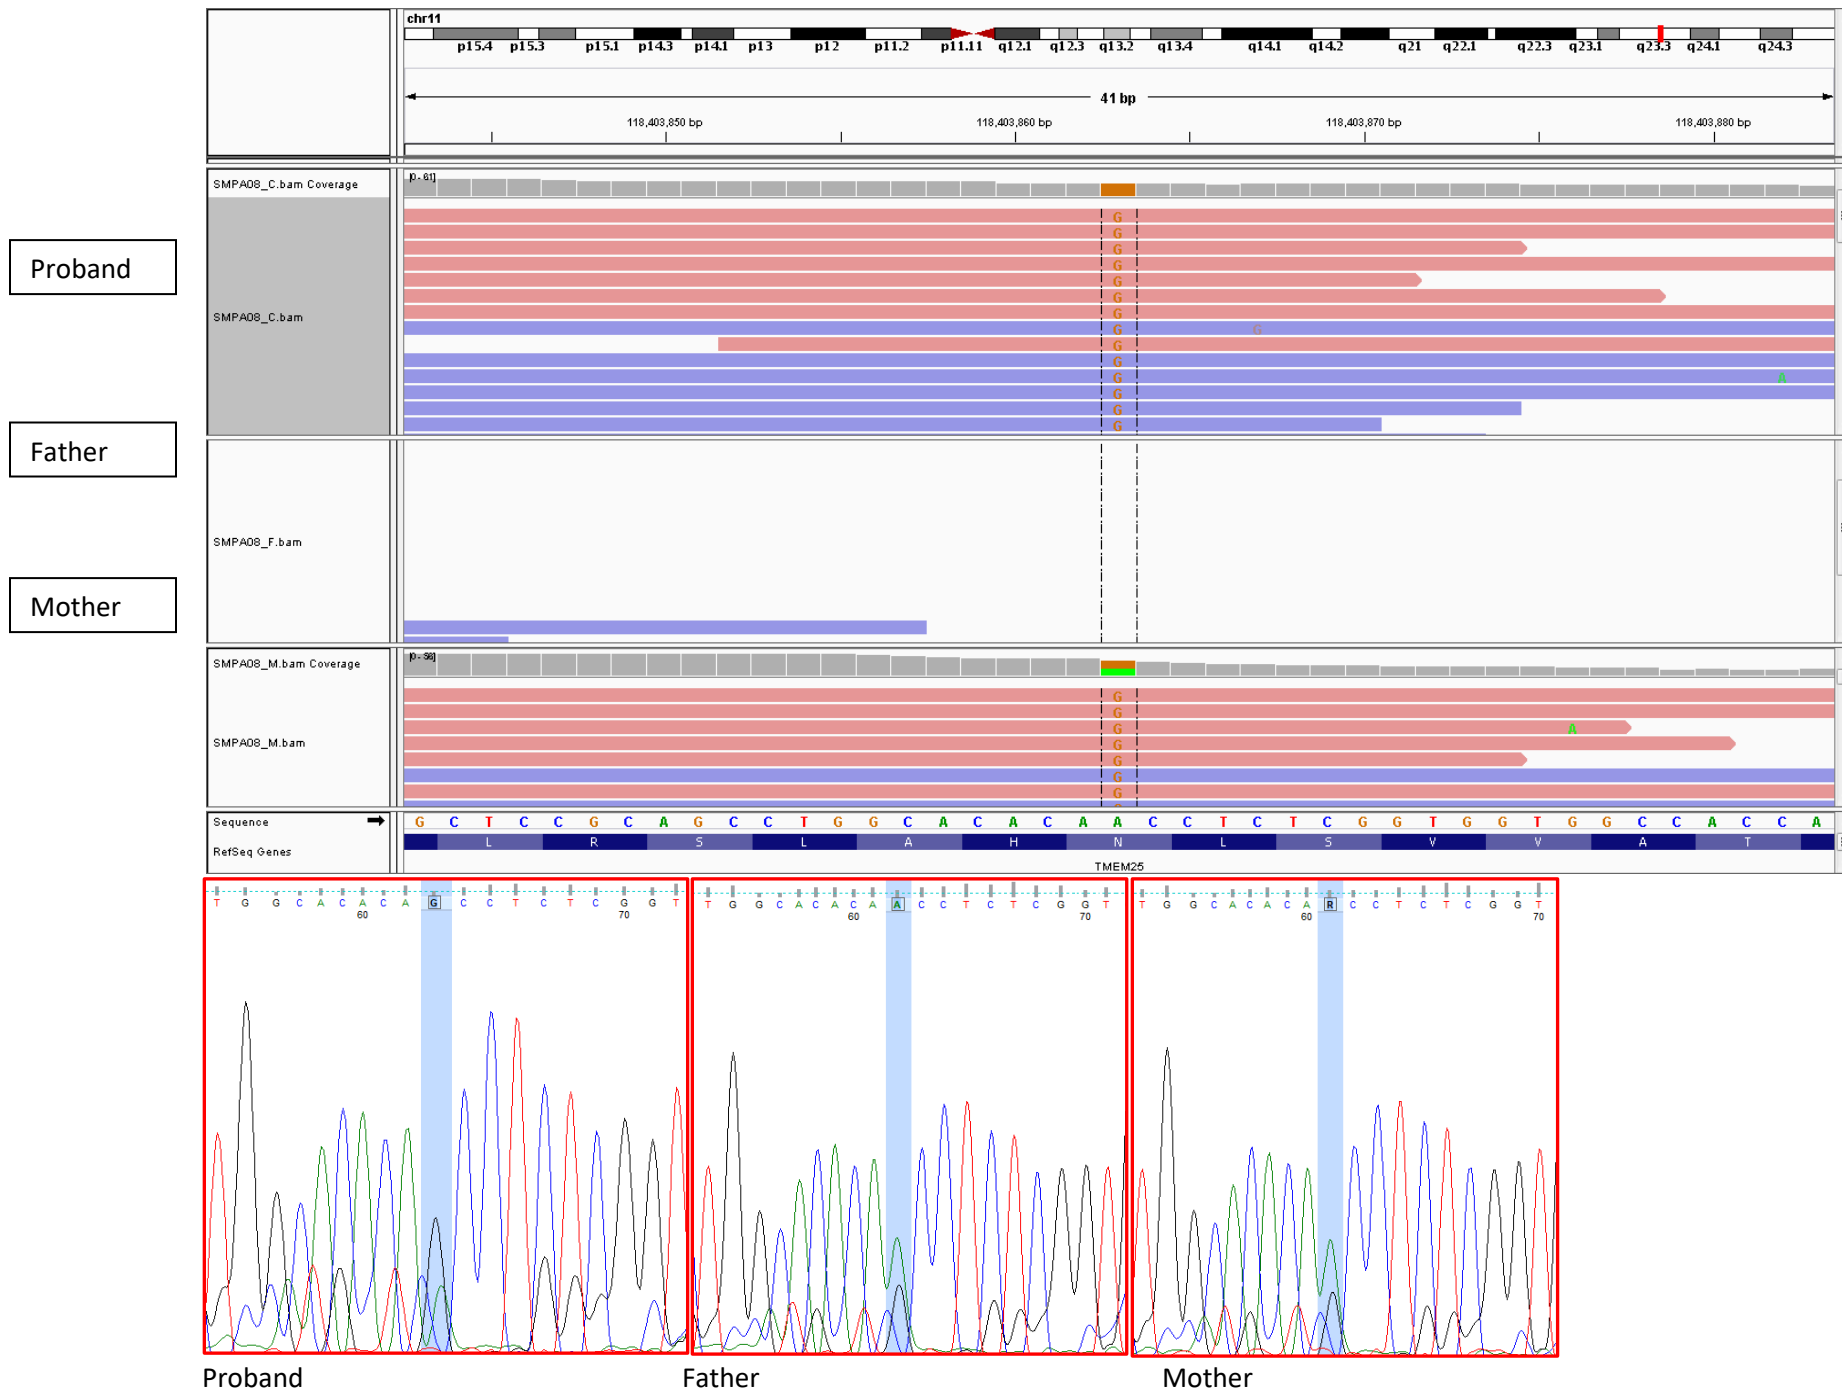

37. IAU79: B4GALNT1

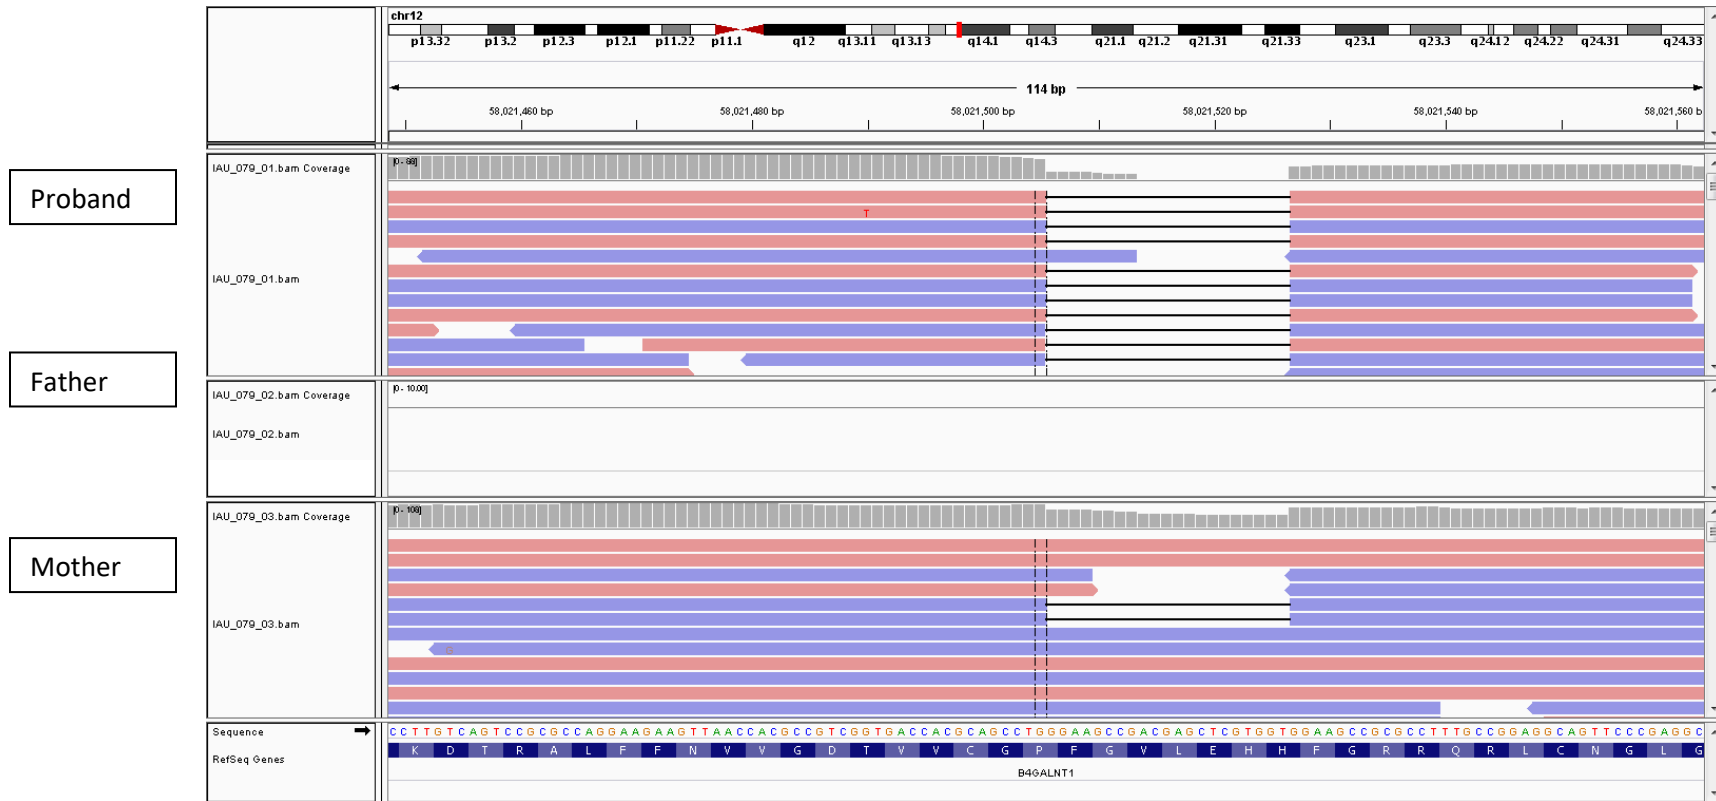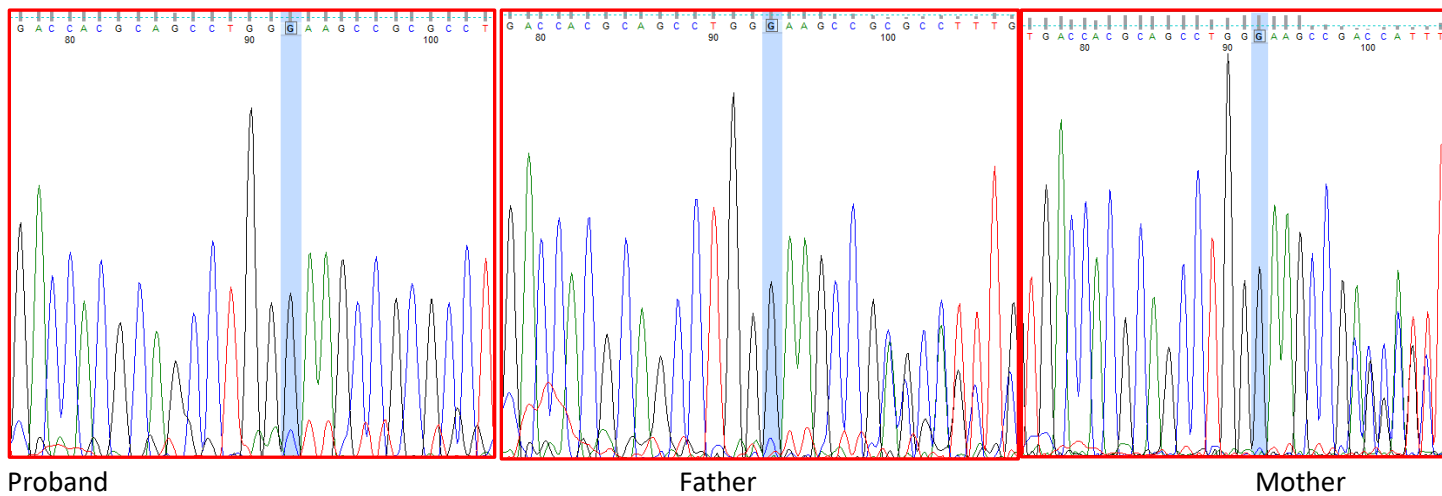

38. IABB10: CPM

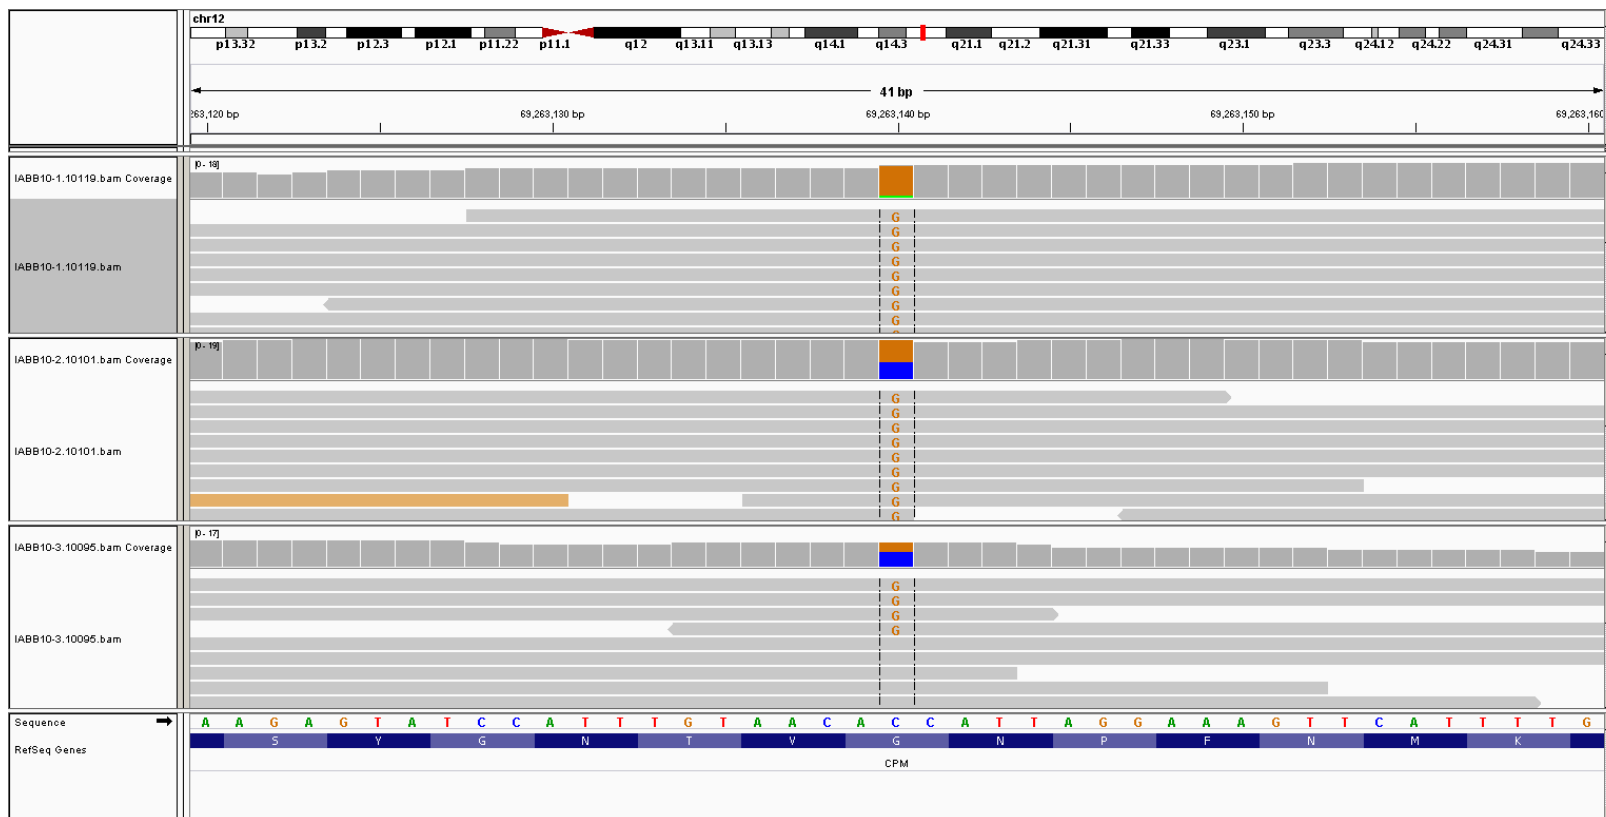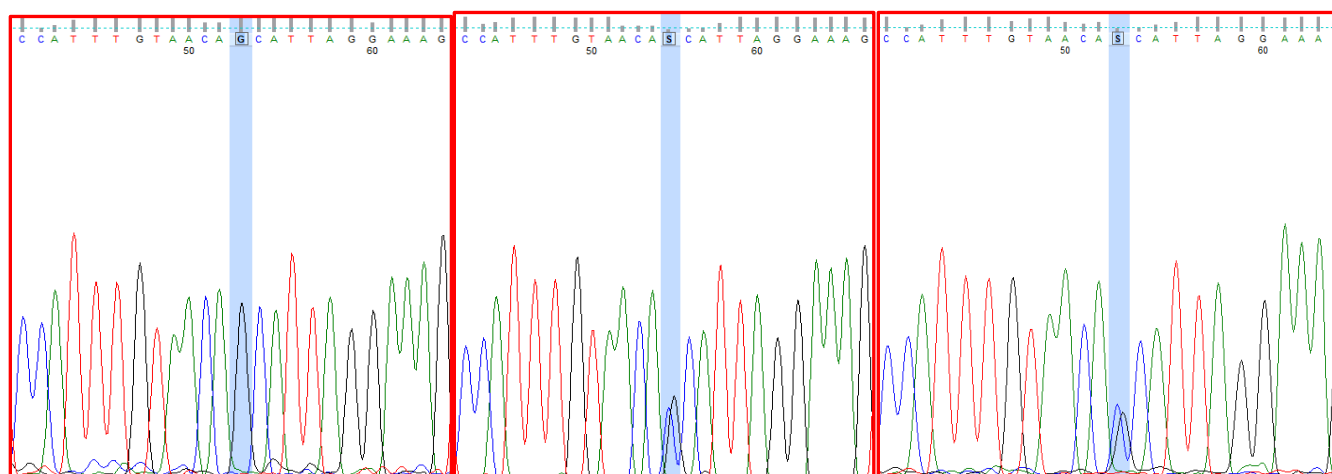

Proband

Father

Mother

39. SMPA8: *PPP1R36*

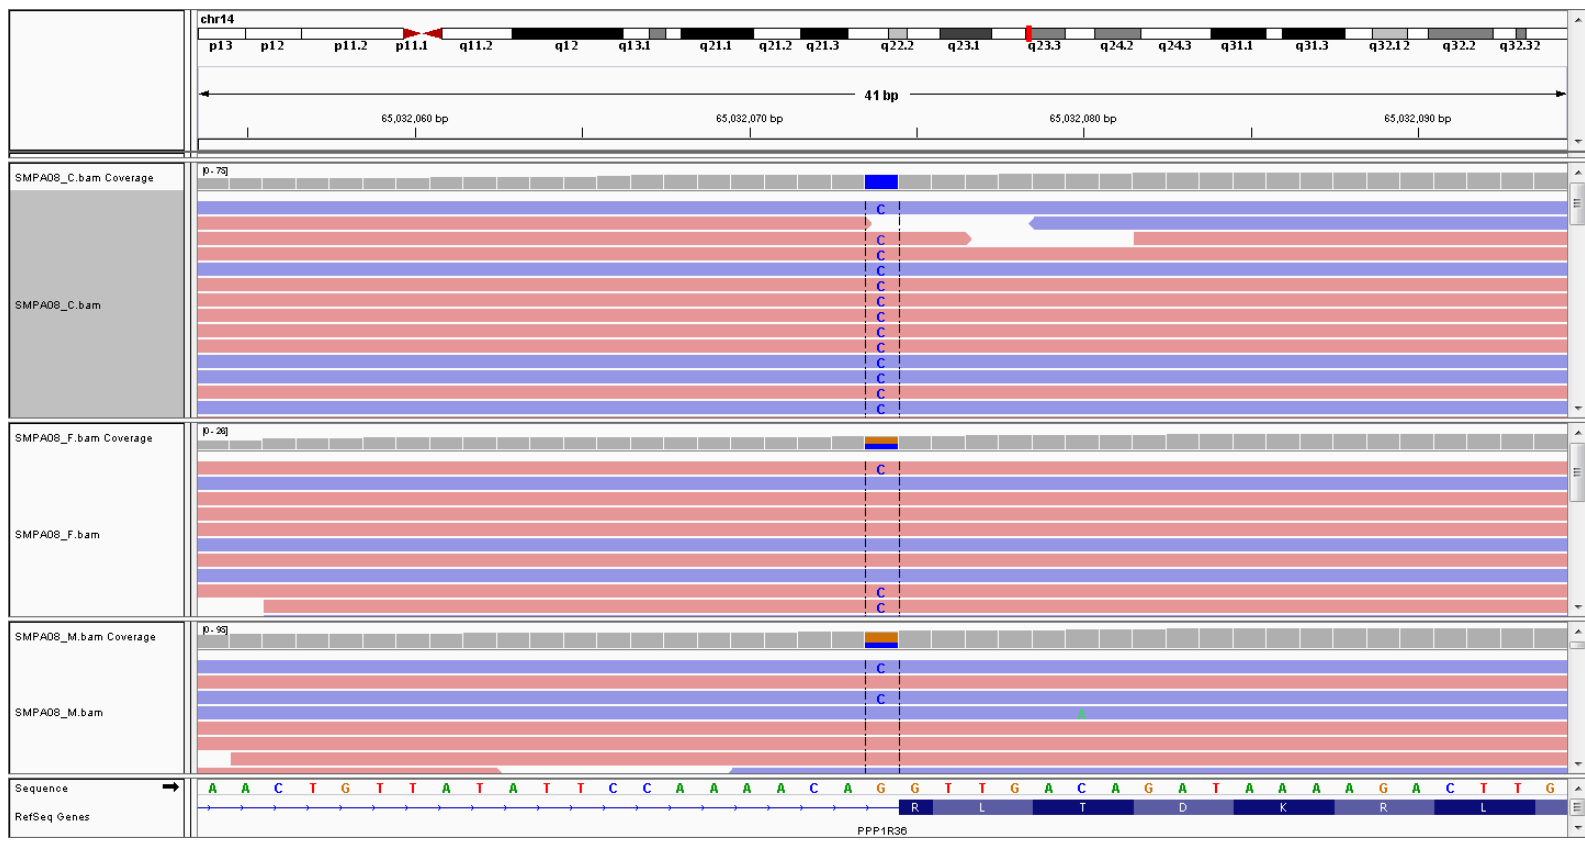

Proband

Father

Mother

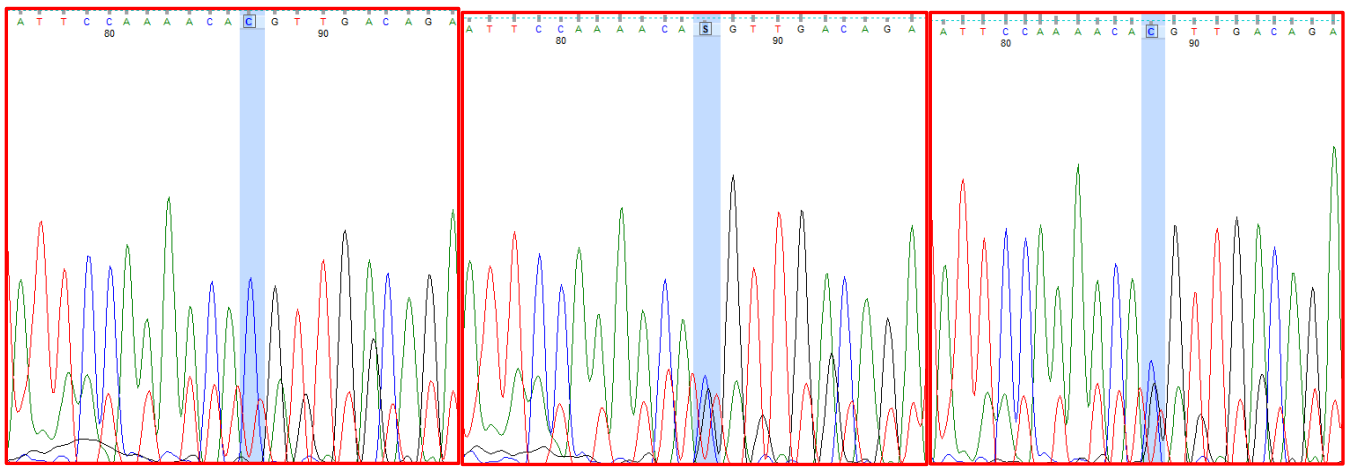

Proband

Father

Mother

40. IA2: *TECPR2*

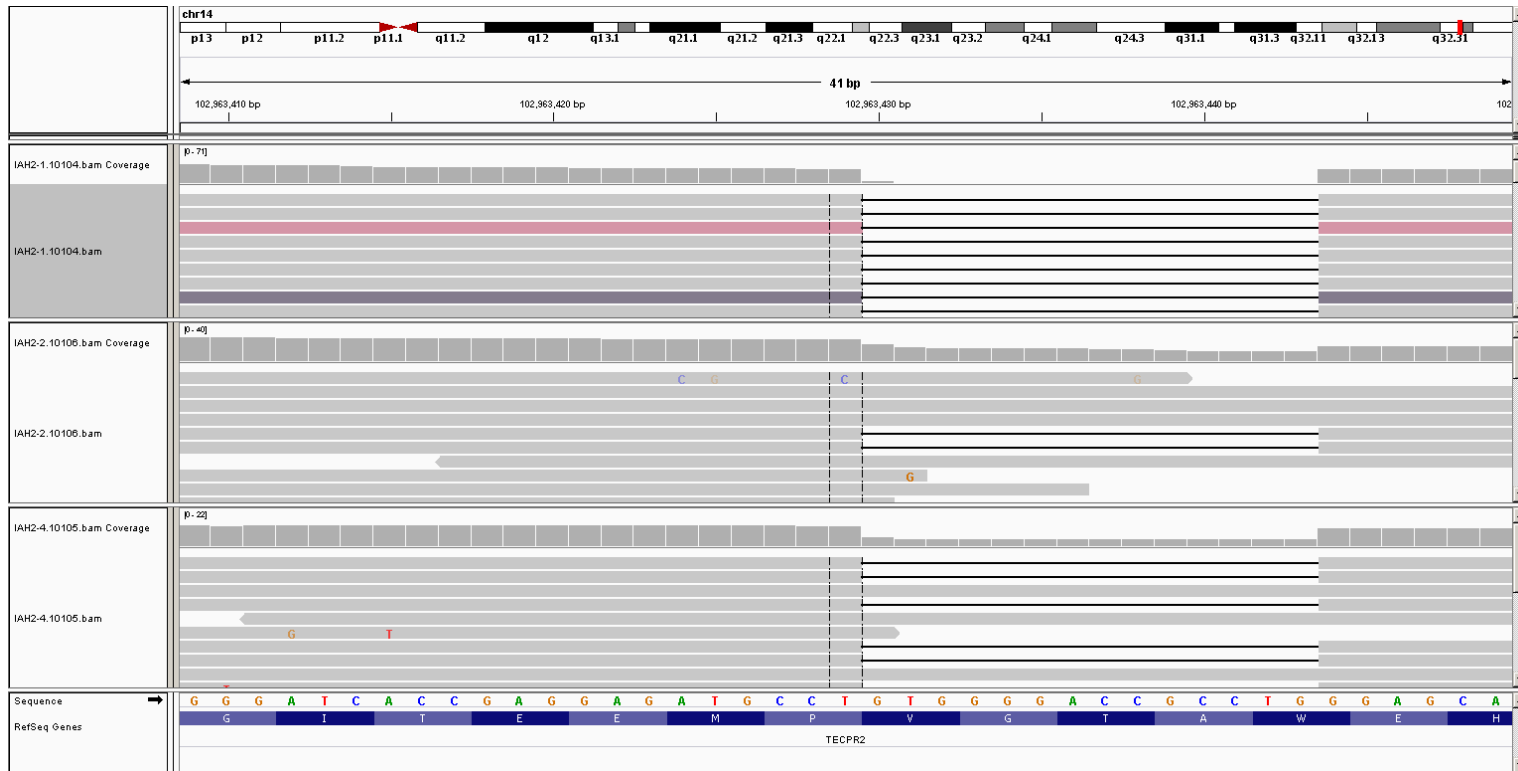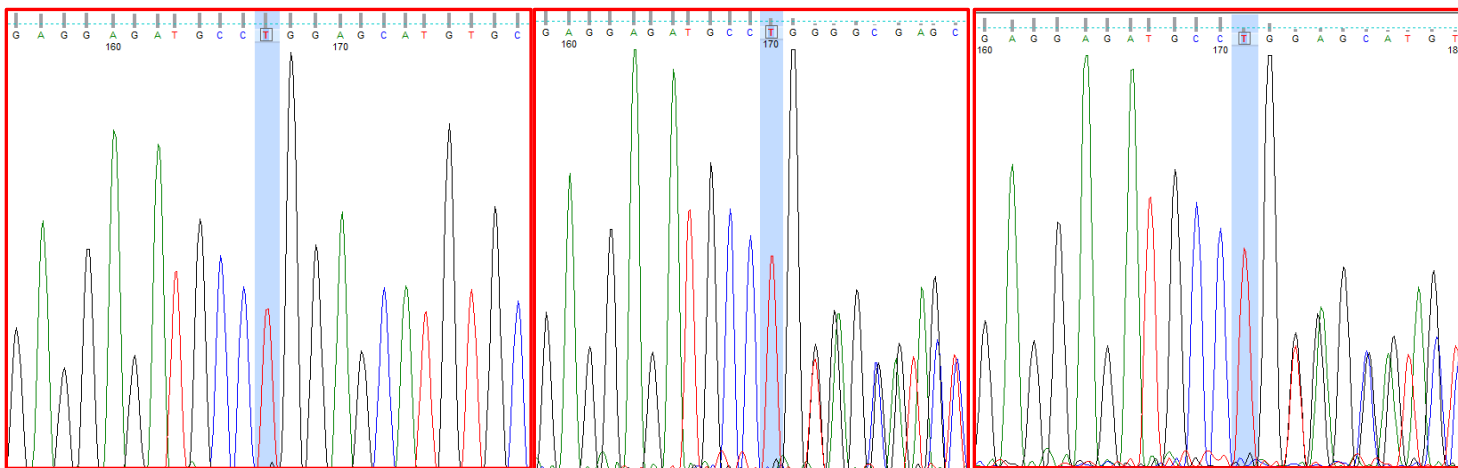

Proband

Father

Mother



41. IABB4: *LINS1*

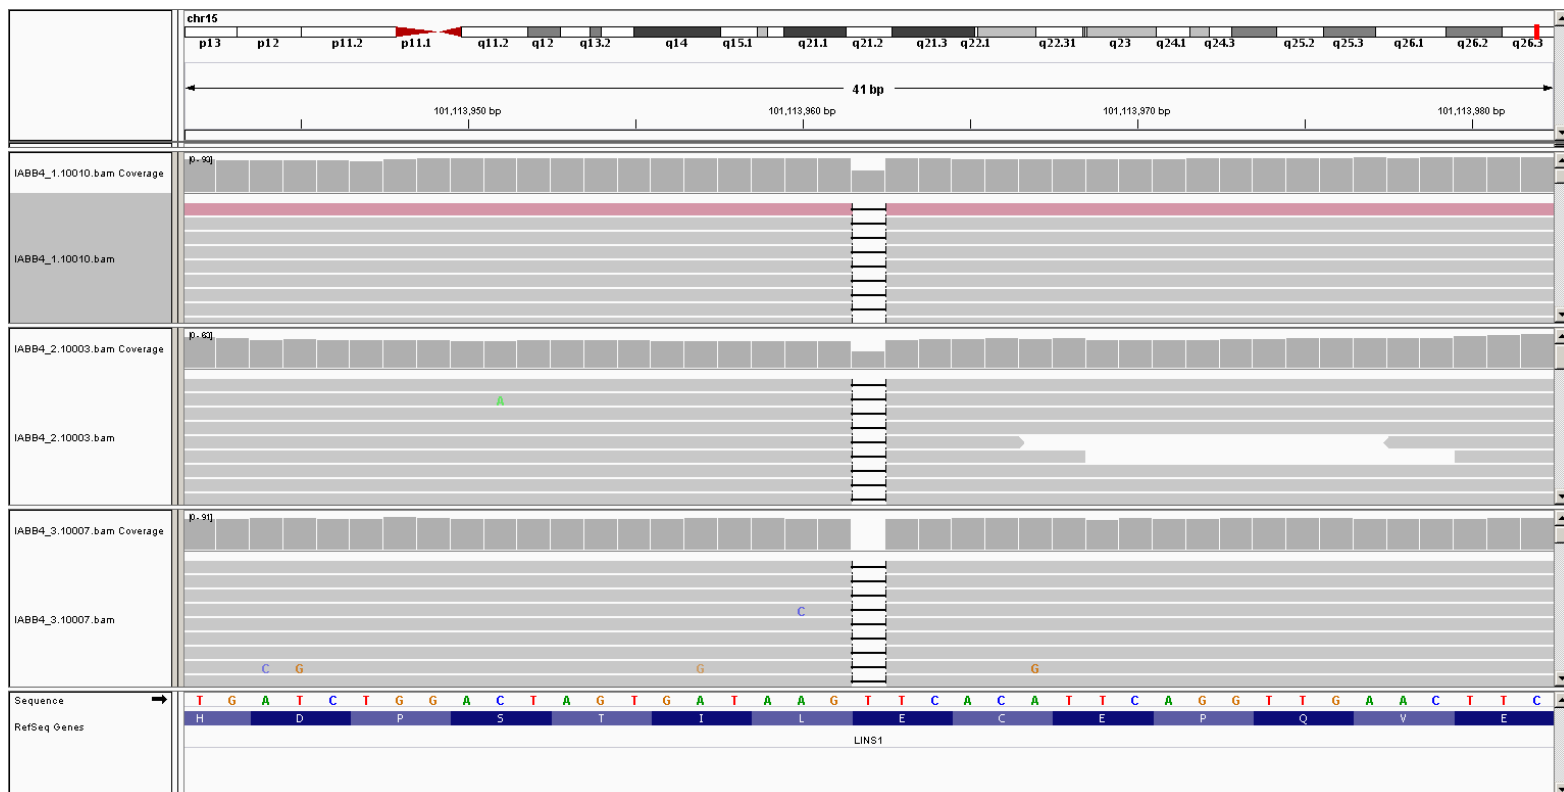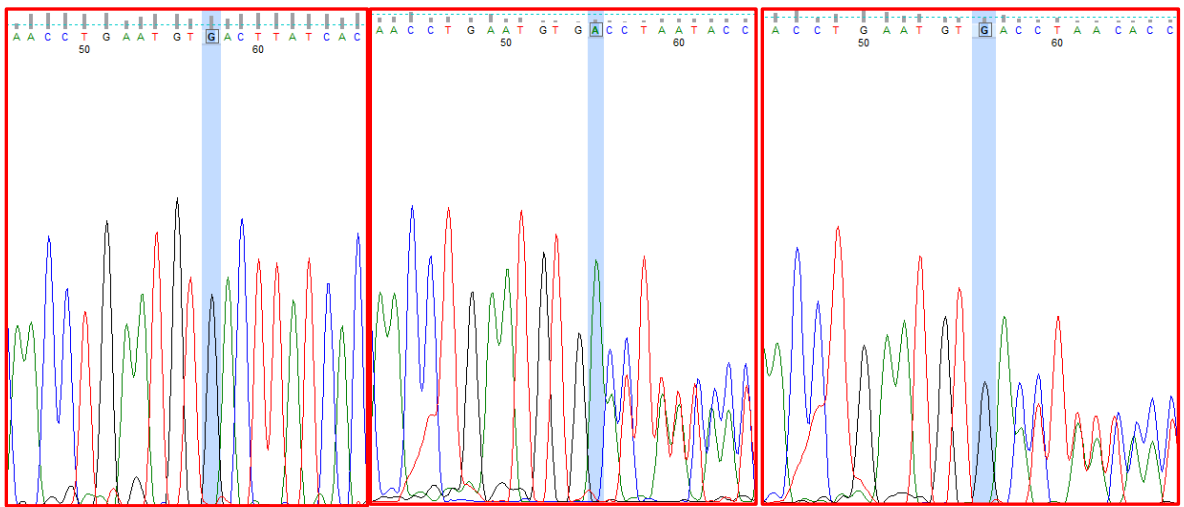

Proband

Father

Mother

42. SMPA76: WDR90

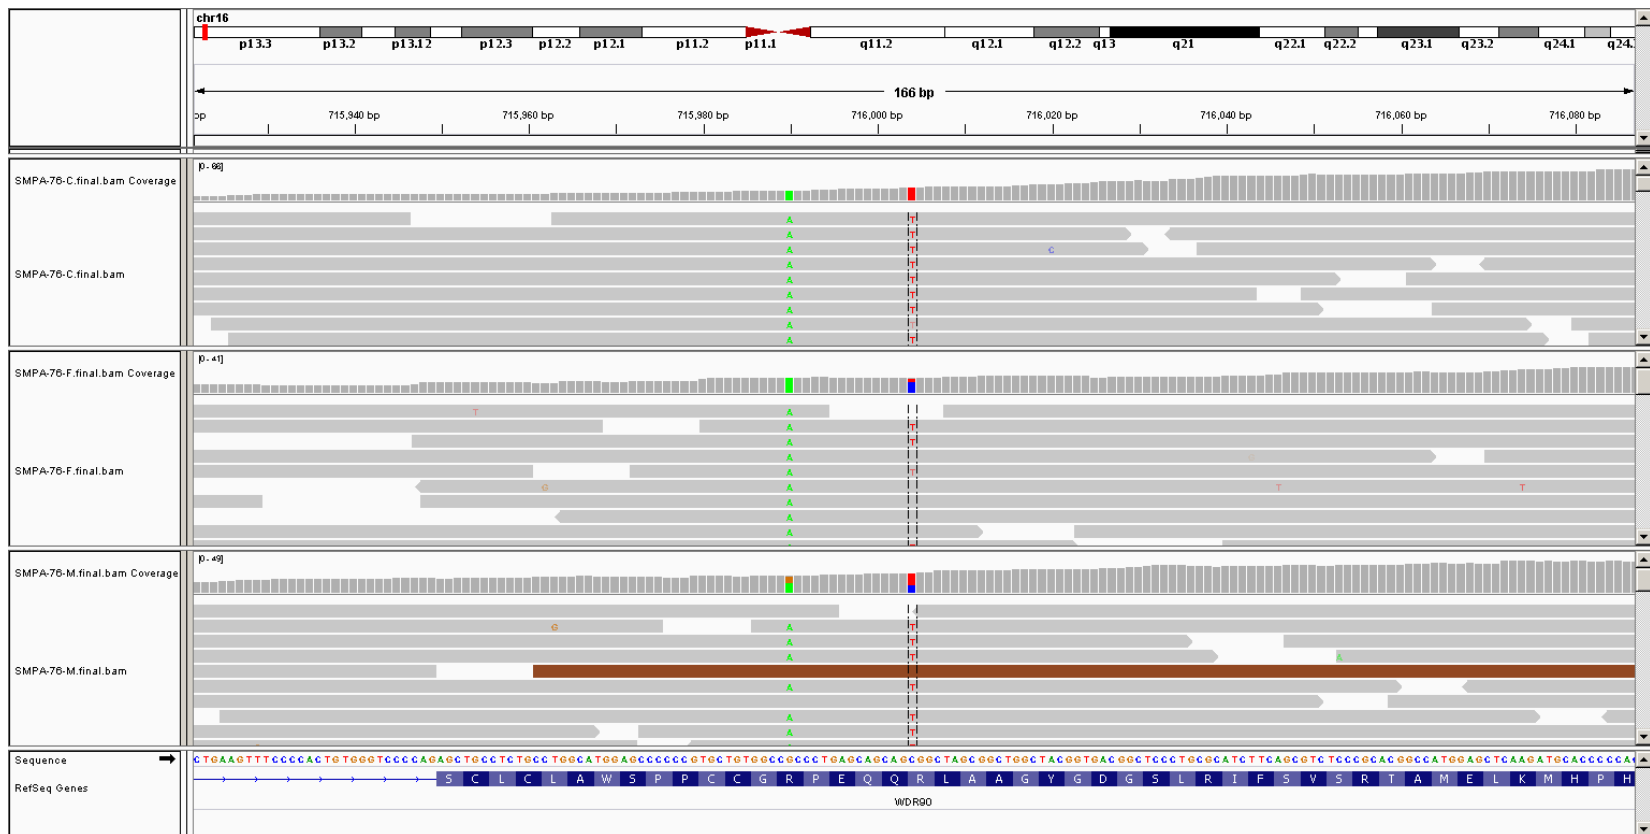

Proband

Father

Mother

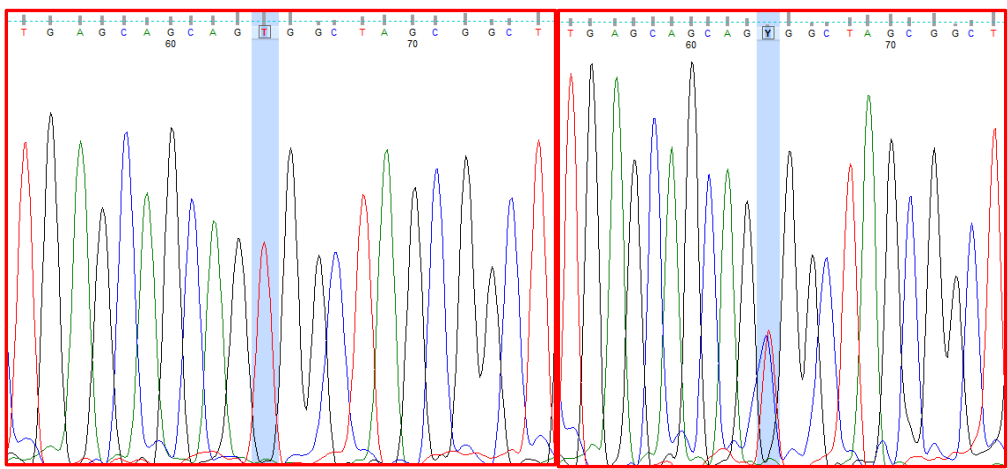

Proband

Father

43. IABB14: ASPA

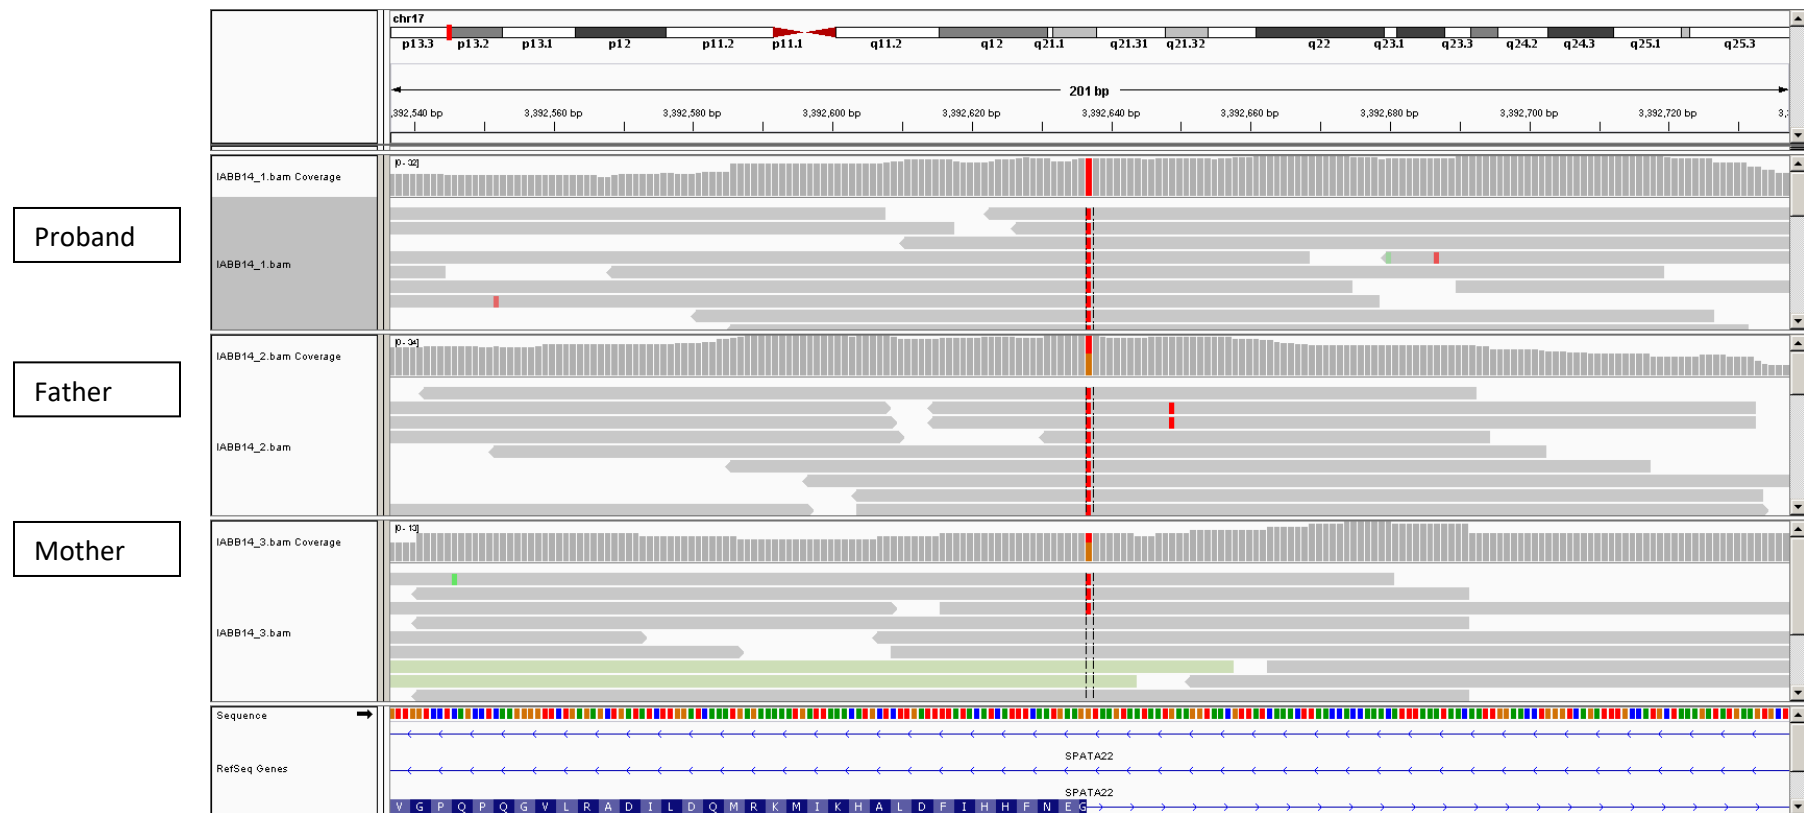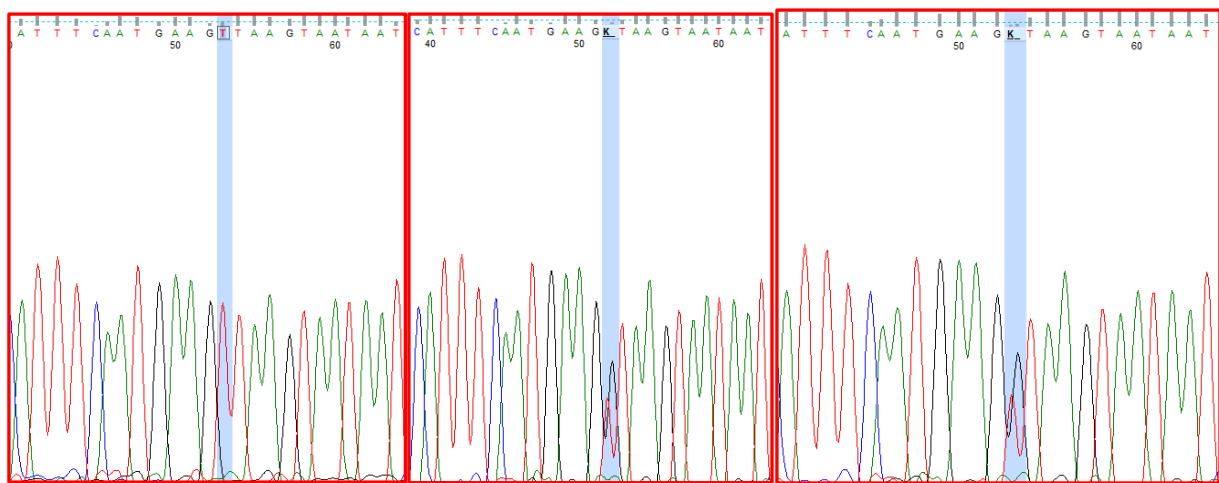

Proband

Father

Mother

44. SA2: CC2D1A

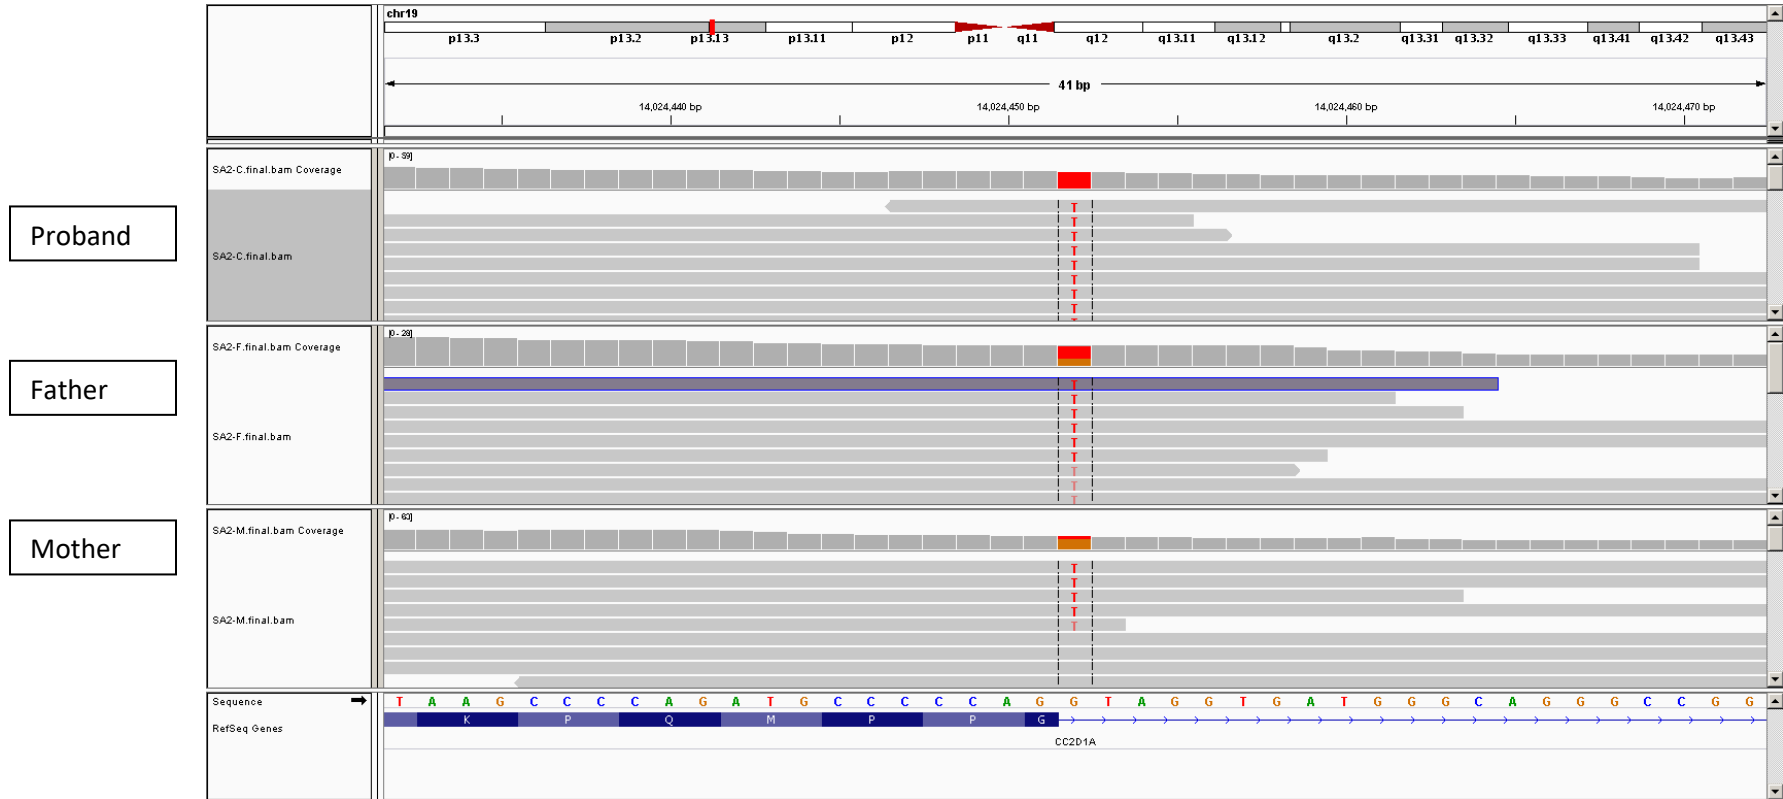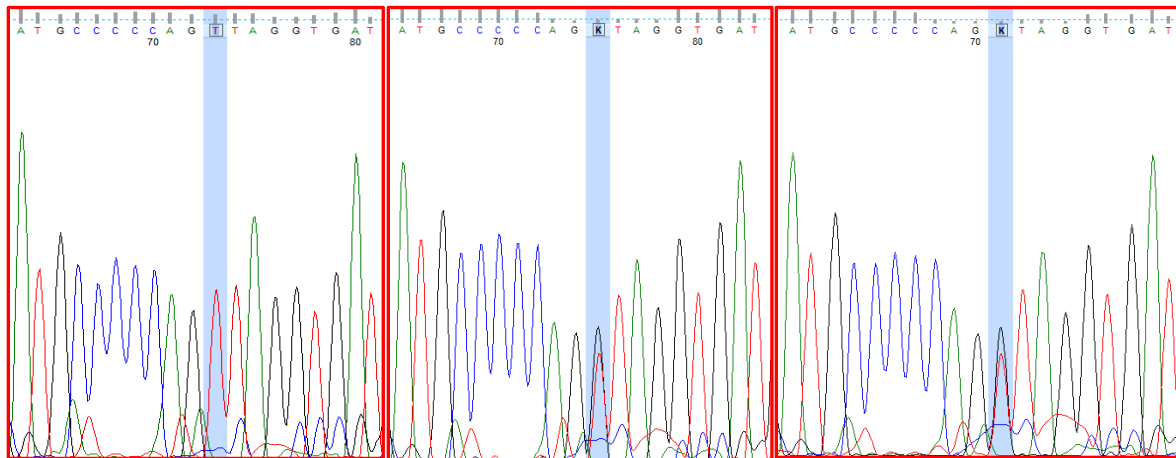

Proband

Father

Mother

45. IABB16: MED25

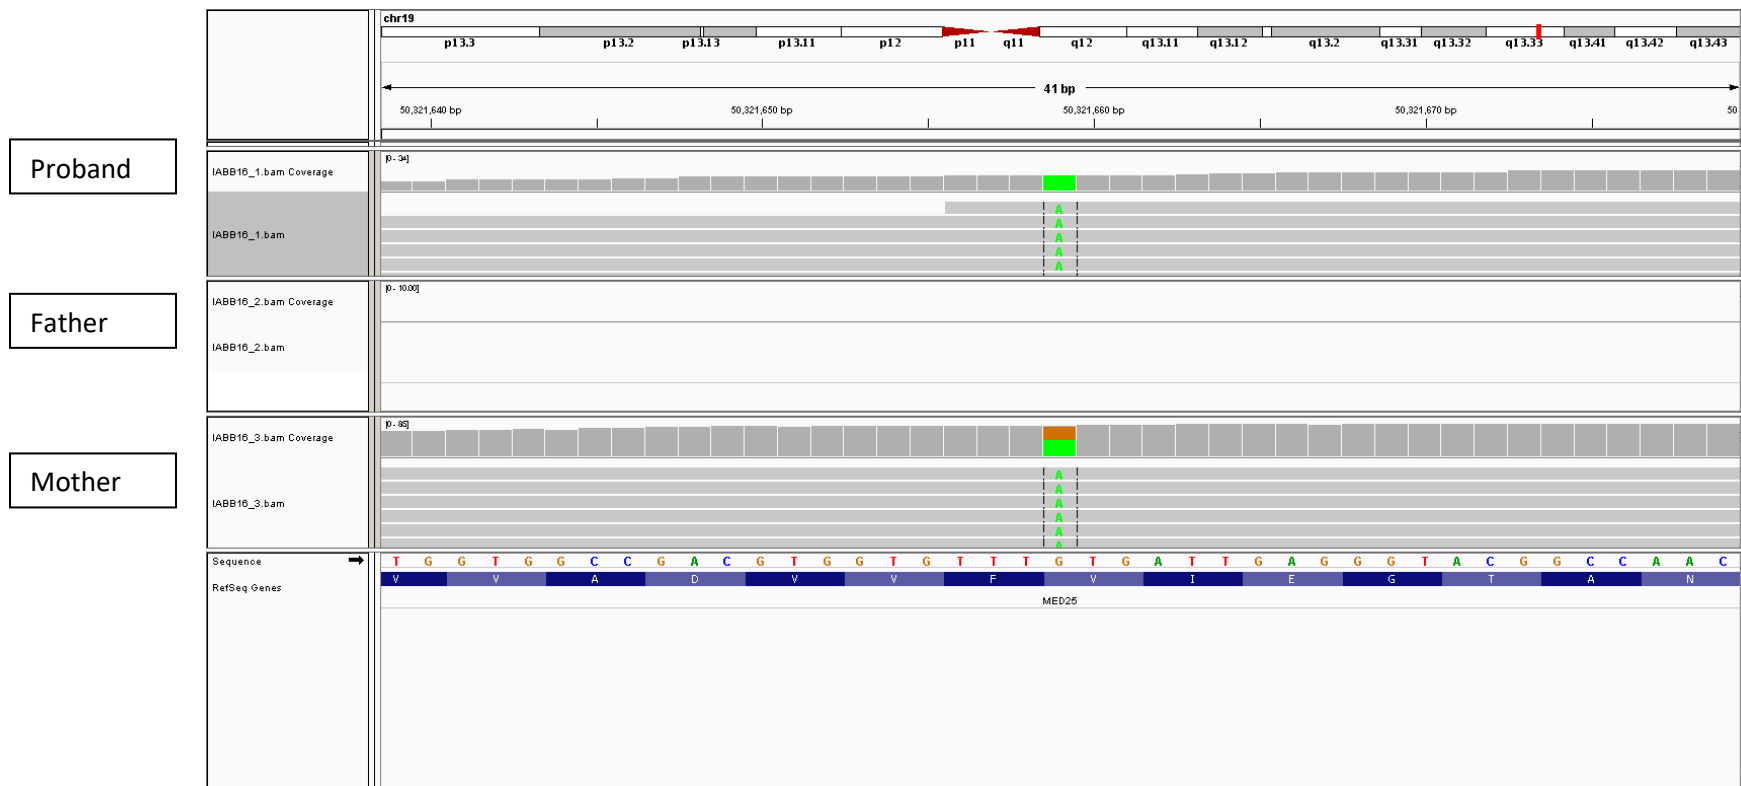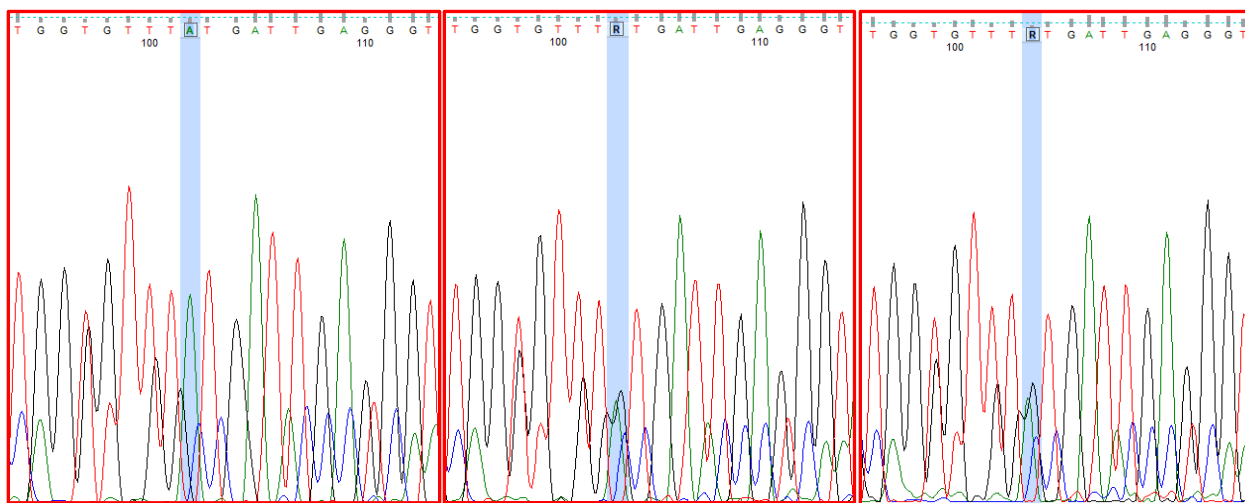

Proband

Father

Mother

46. IABB16: VPS16

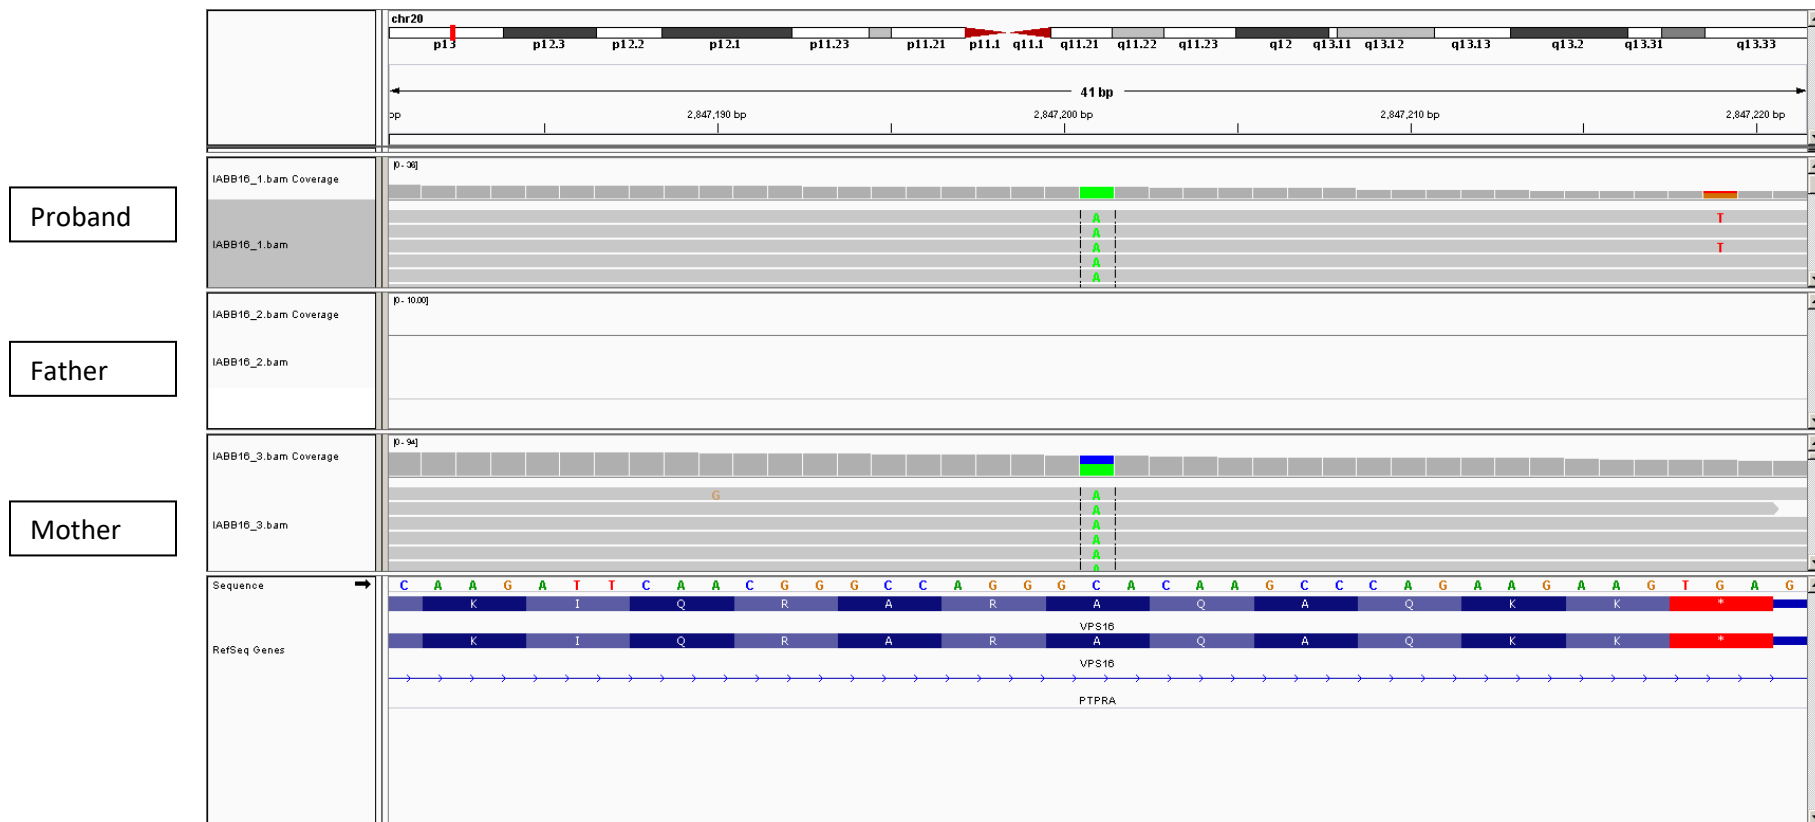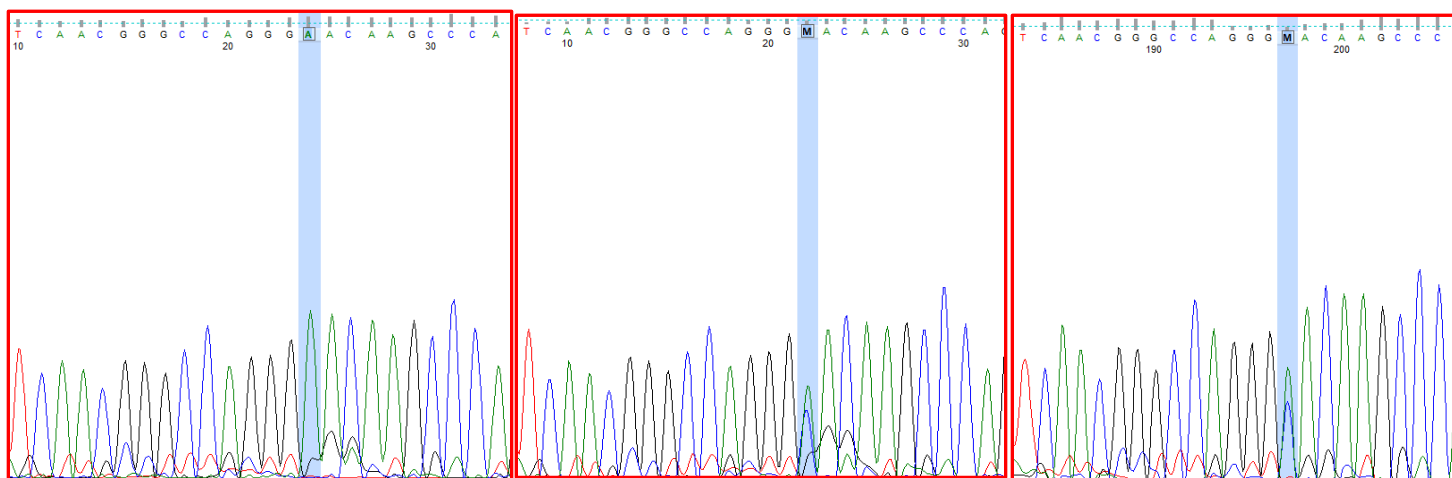

Proband

Father

Mother

47. IABB16: *KIF16B*

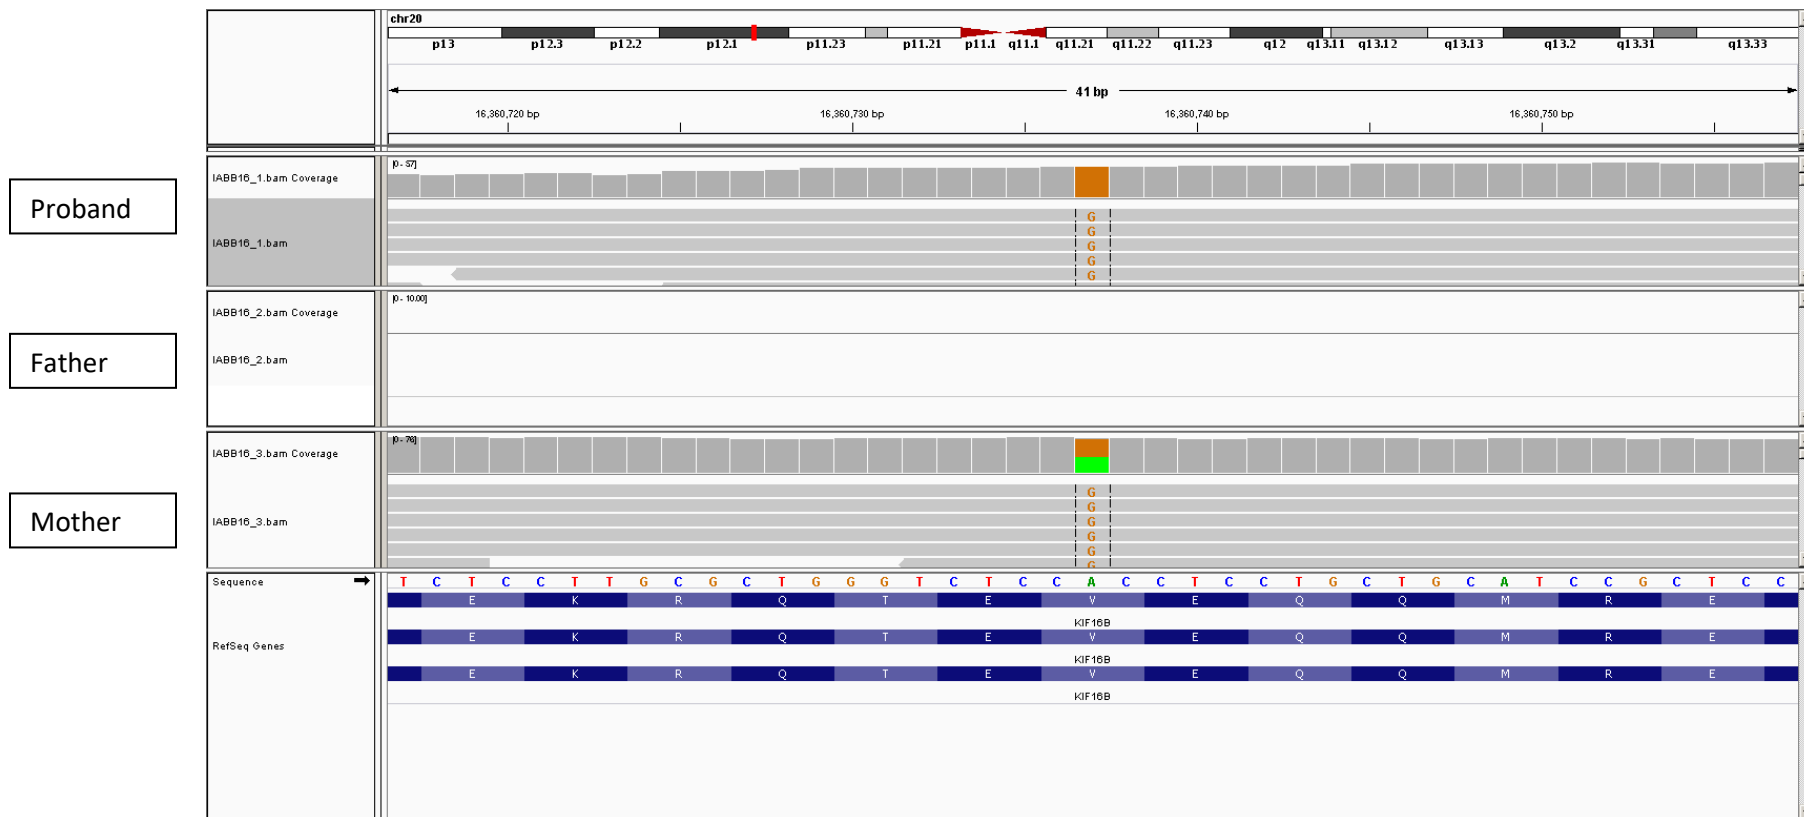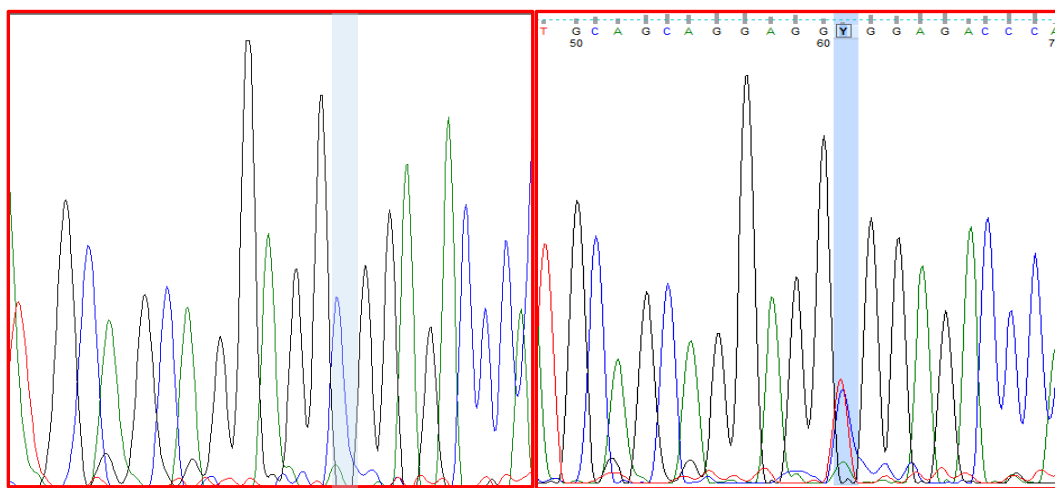

Proband

Mother

48. SMPA9: *EFCAB8*

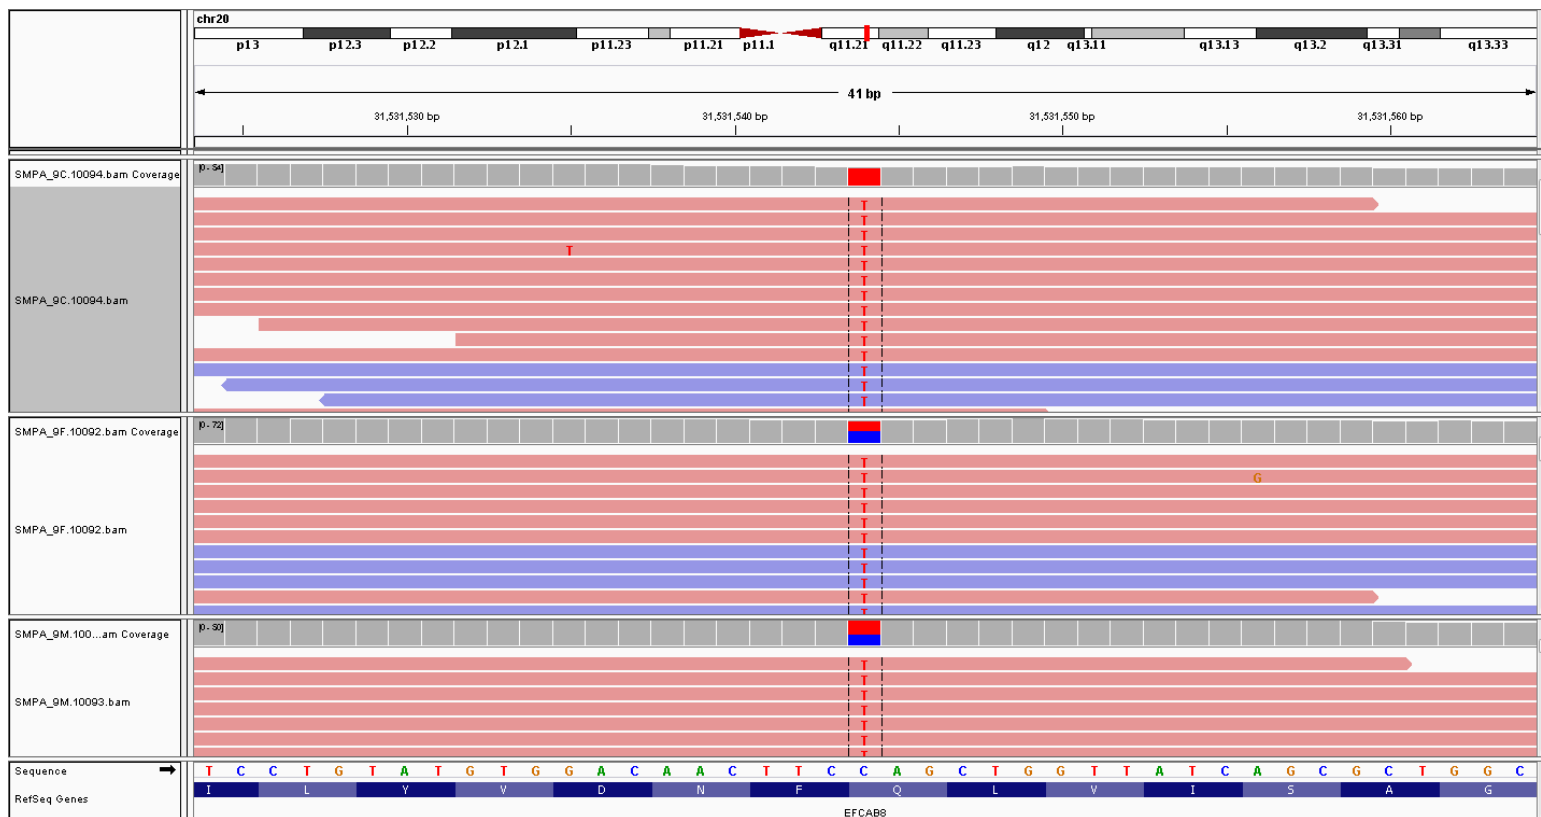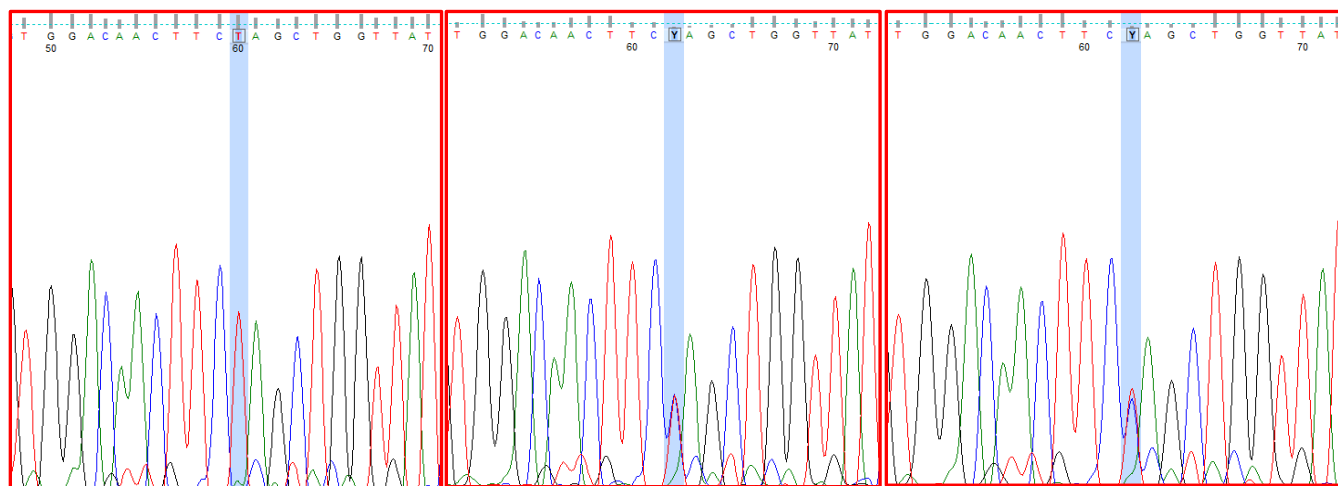

Proband

Father

Mother



49. IABB5: ZNF335

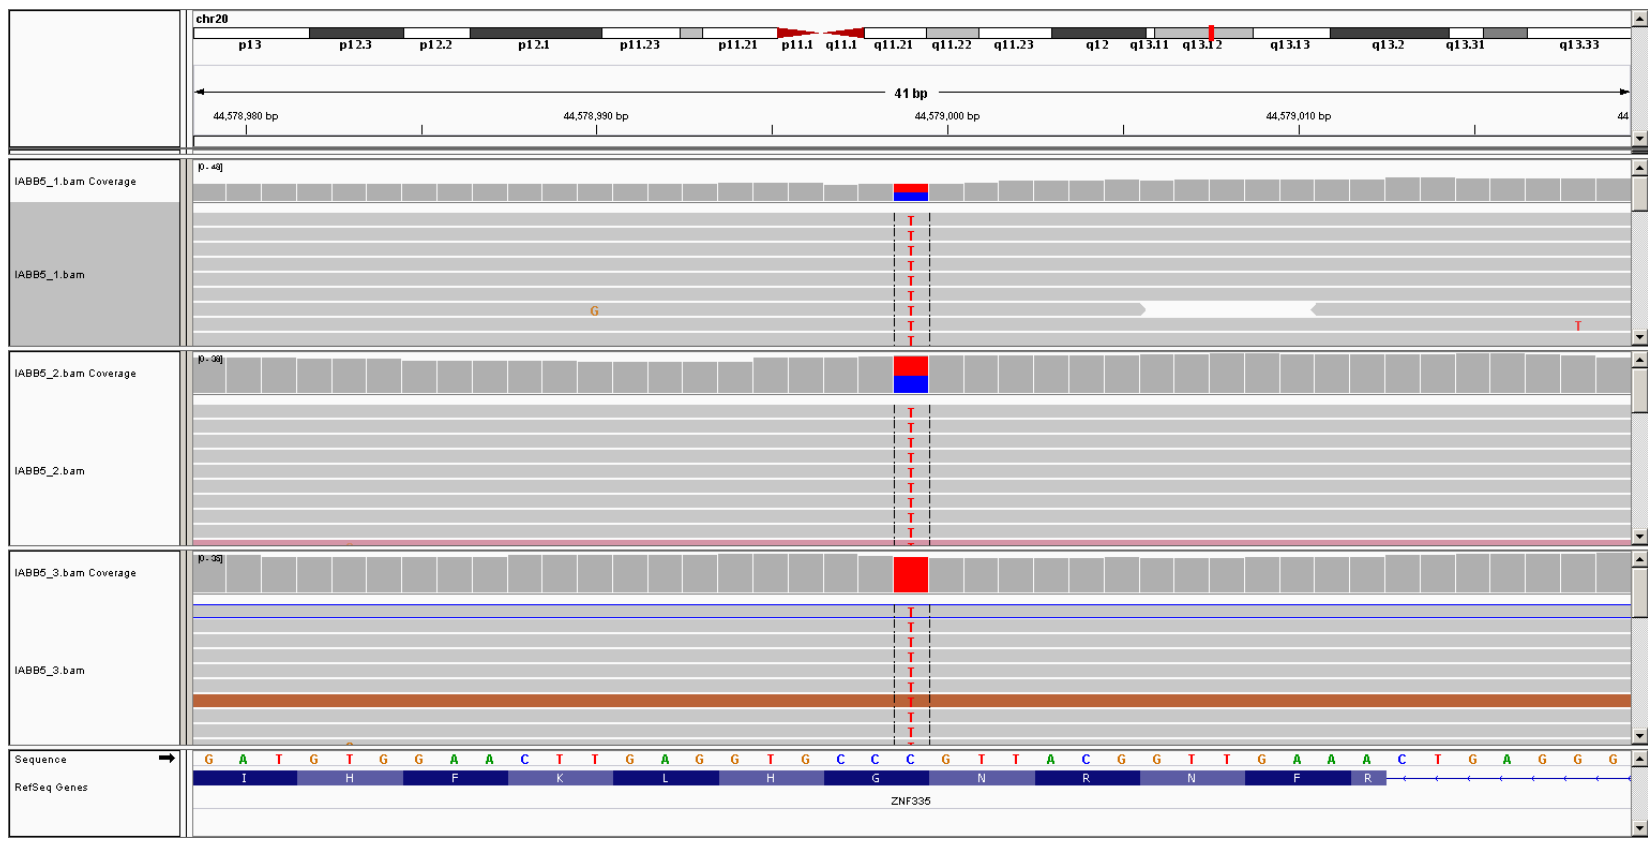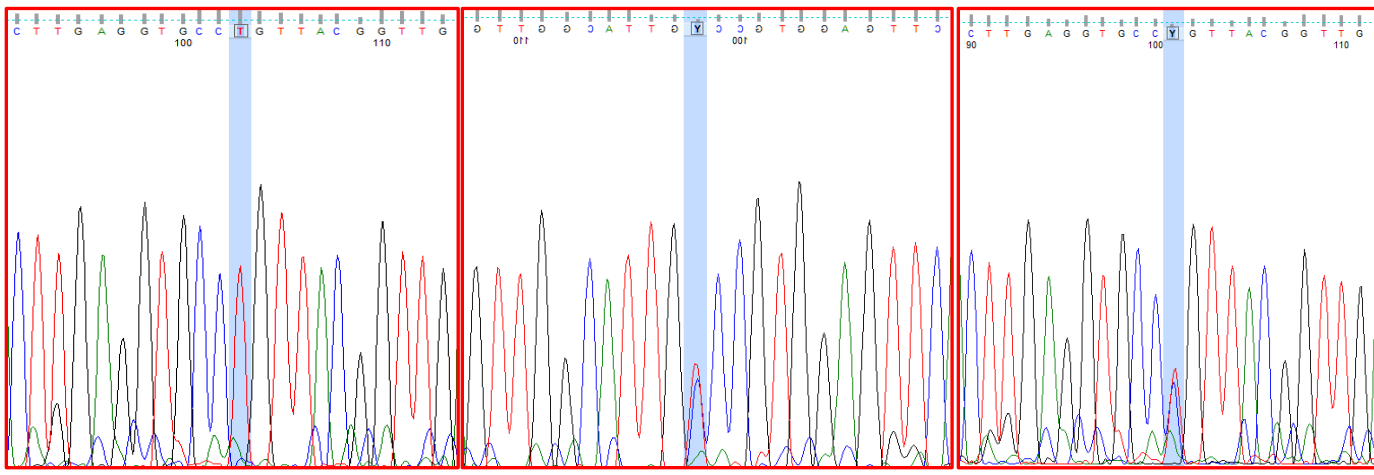

Proband

Father

Mother

50. IABB11: *SGSM3*

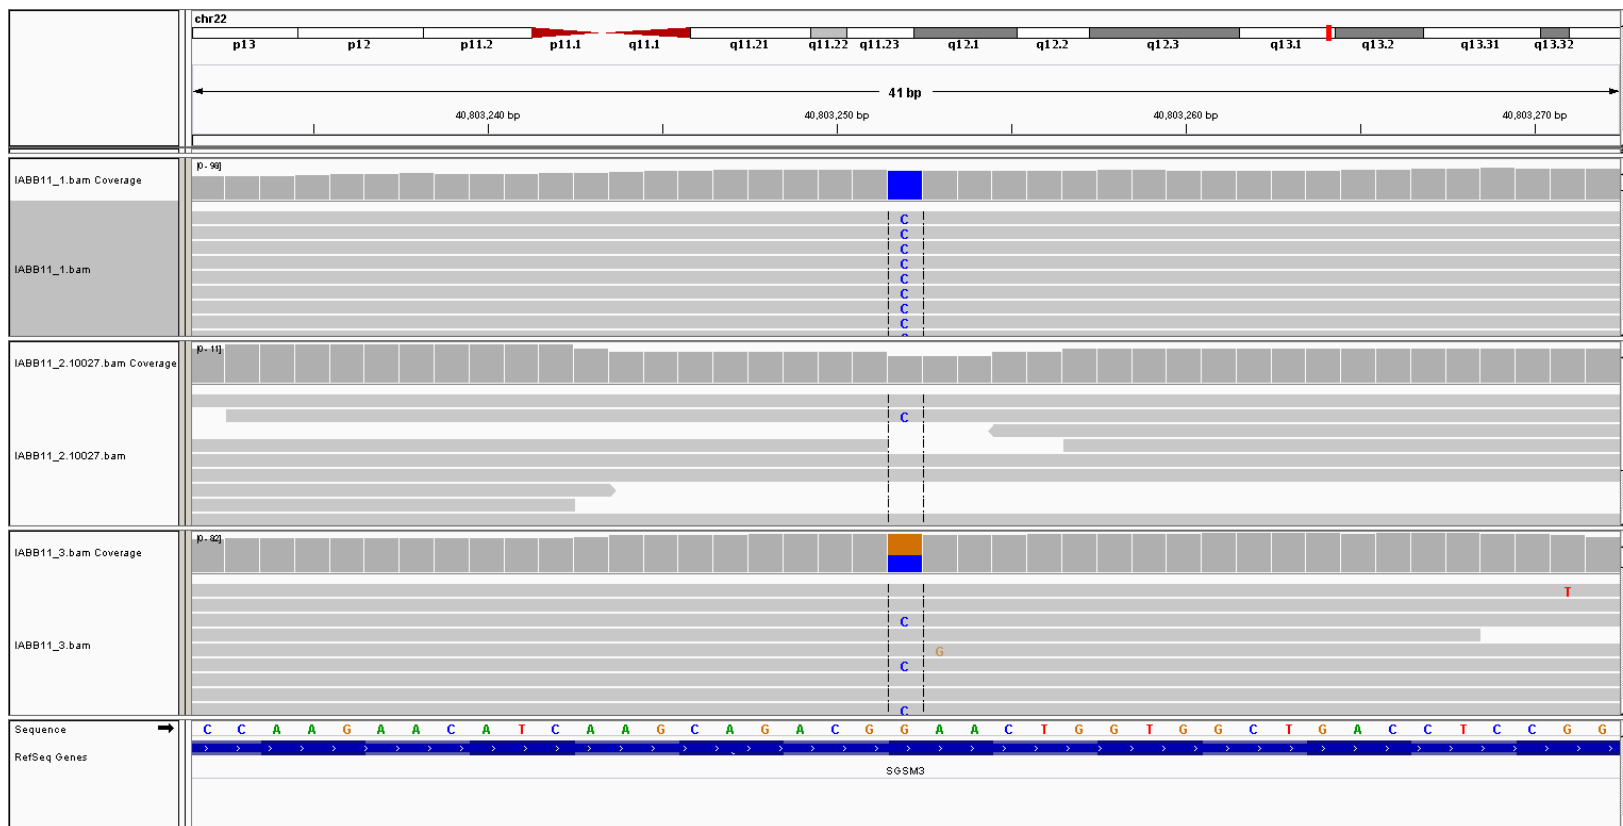

Proband

Father

Mother

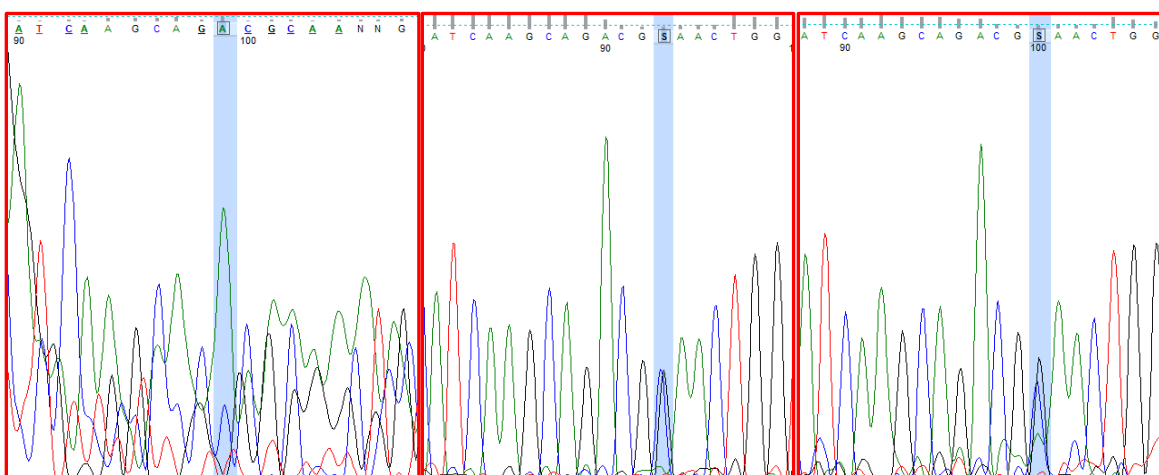

Proband

Father

Mother

**Table 2: De novo/dominant**

1. RQPA20: *RAB42*

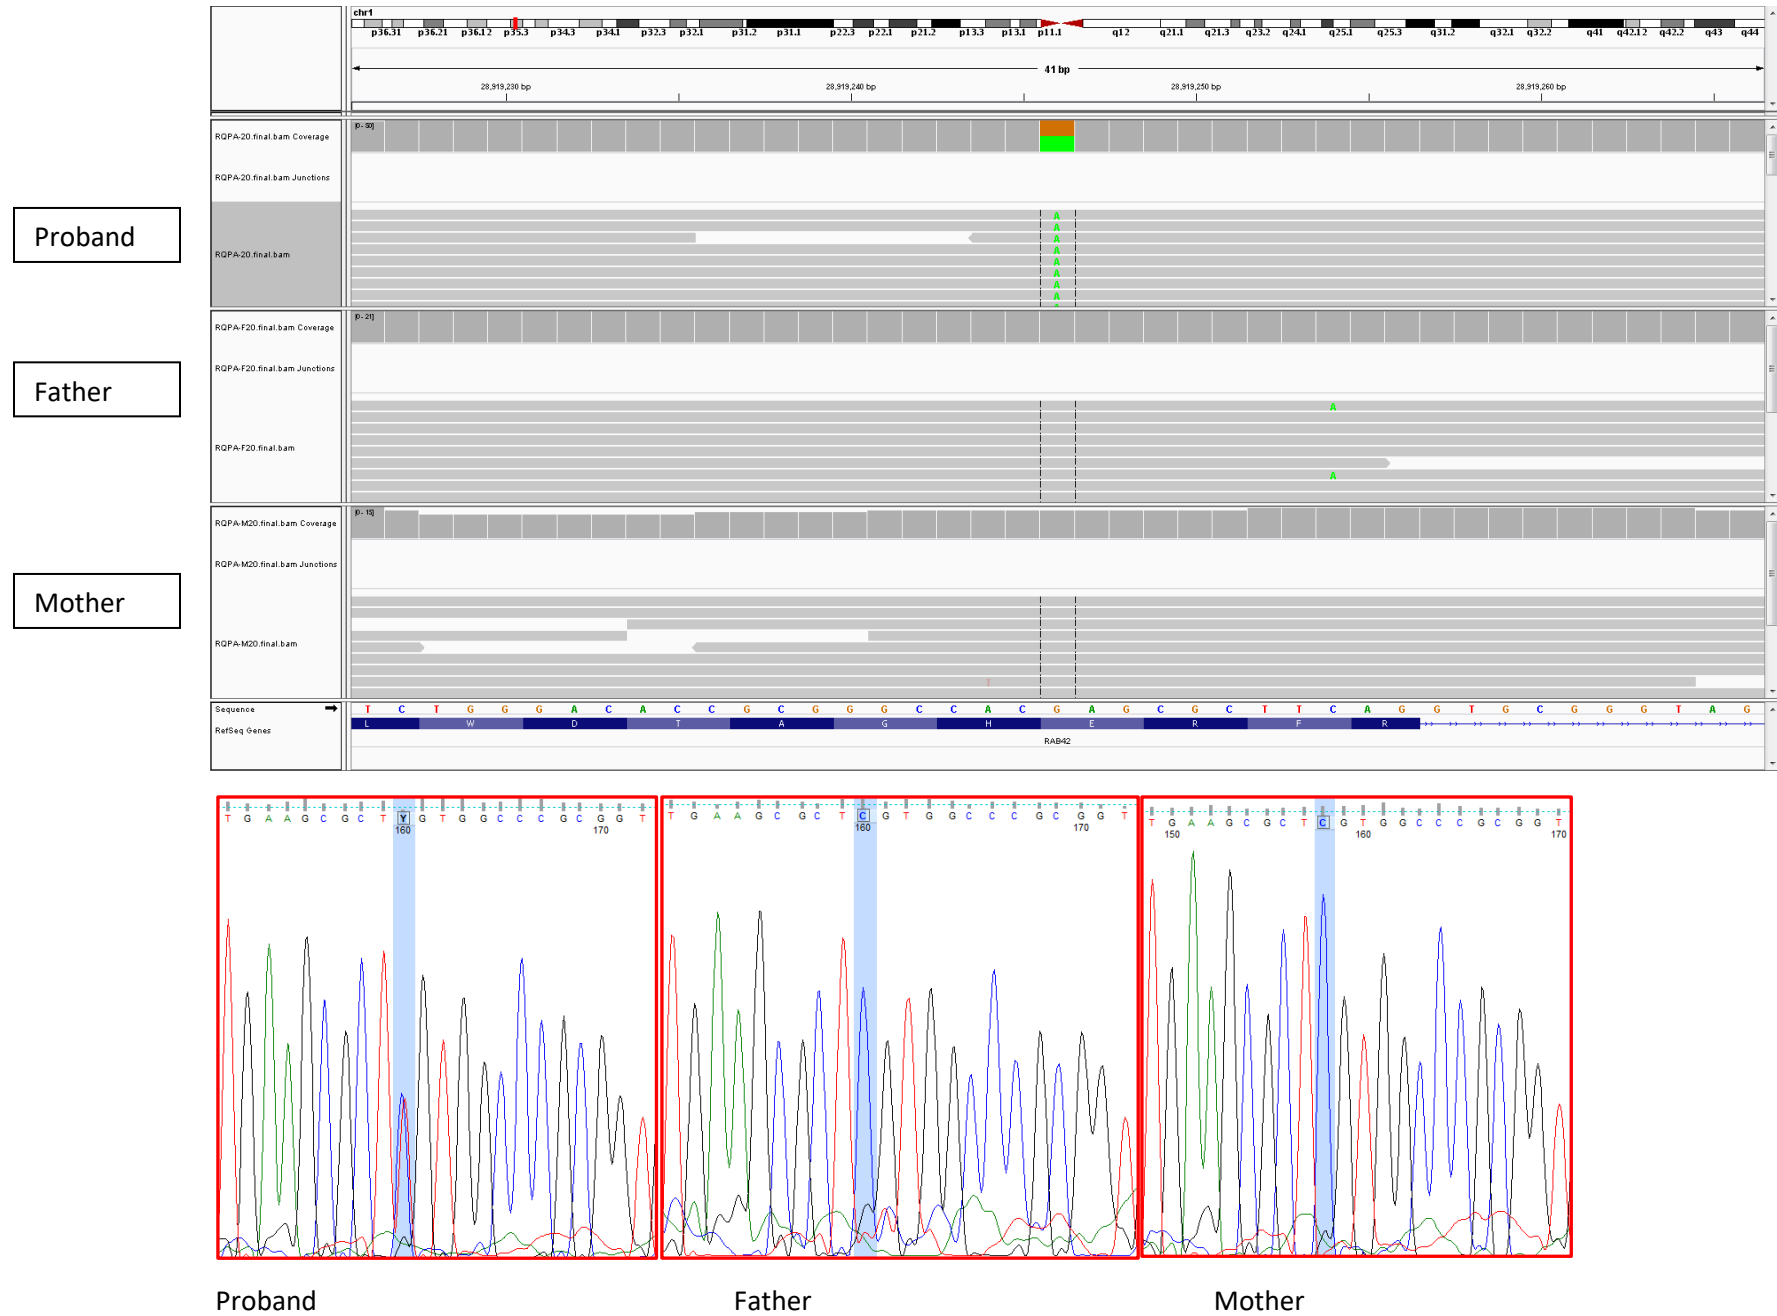

## 2. RQPA20: *TMIGD3*

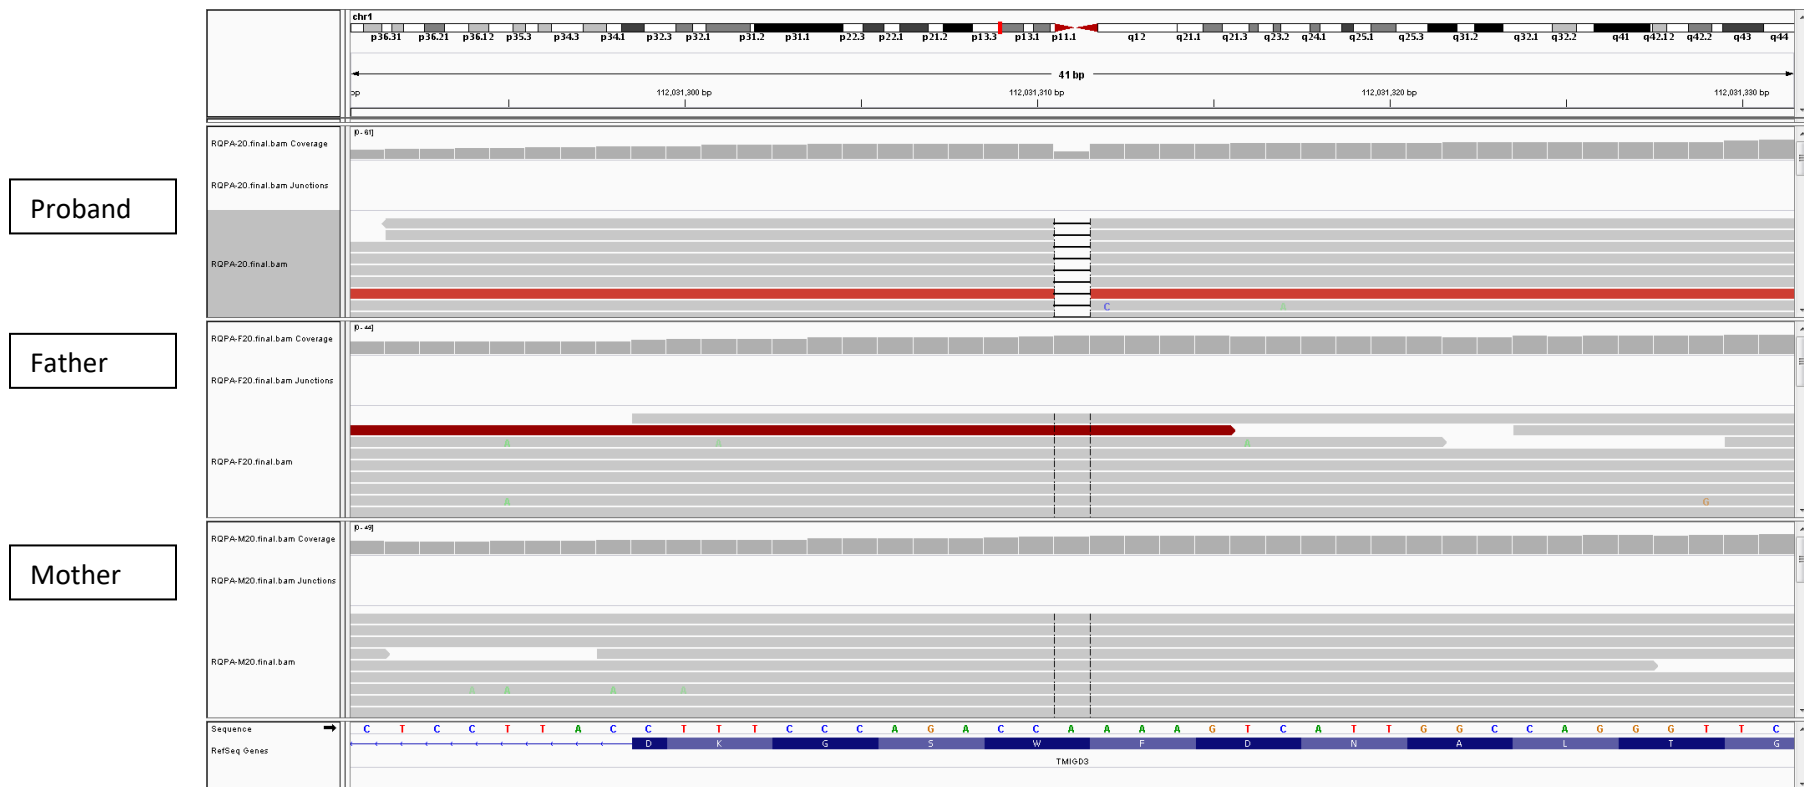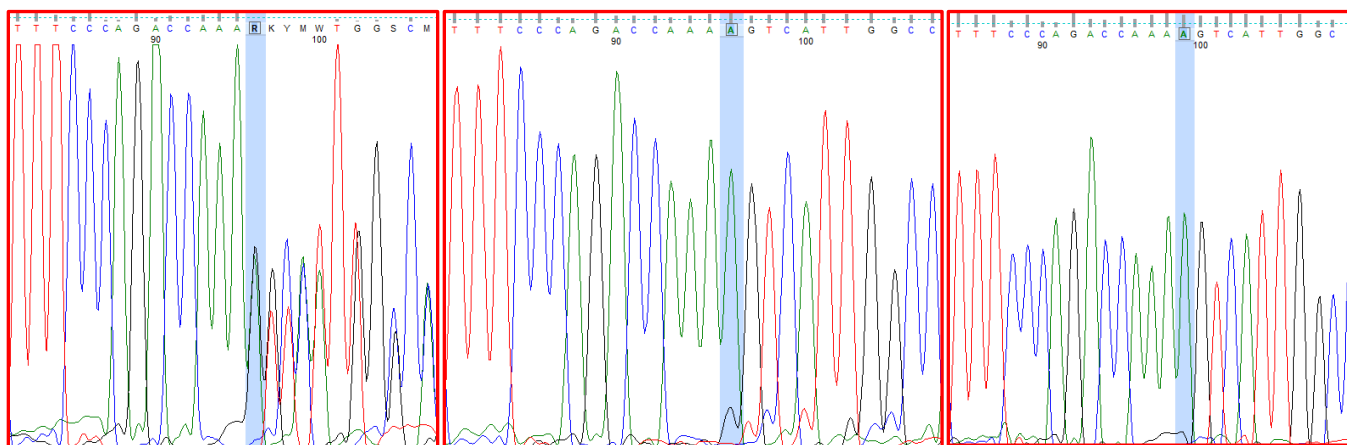

Proband

Father

Mother

### 3. RQPA20: ECM1

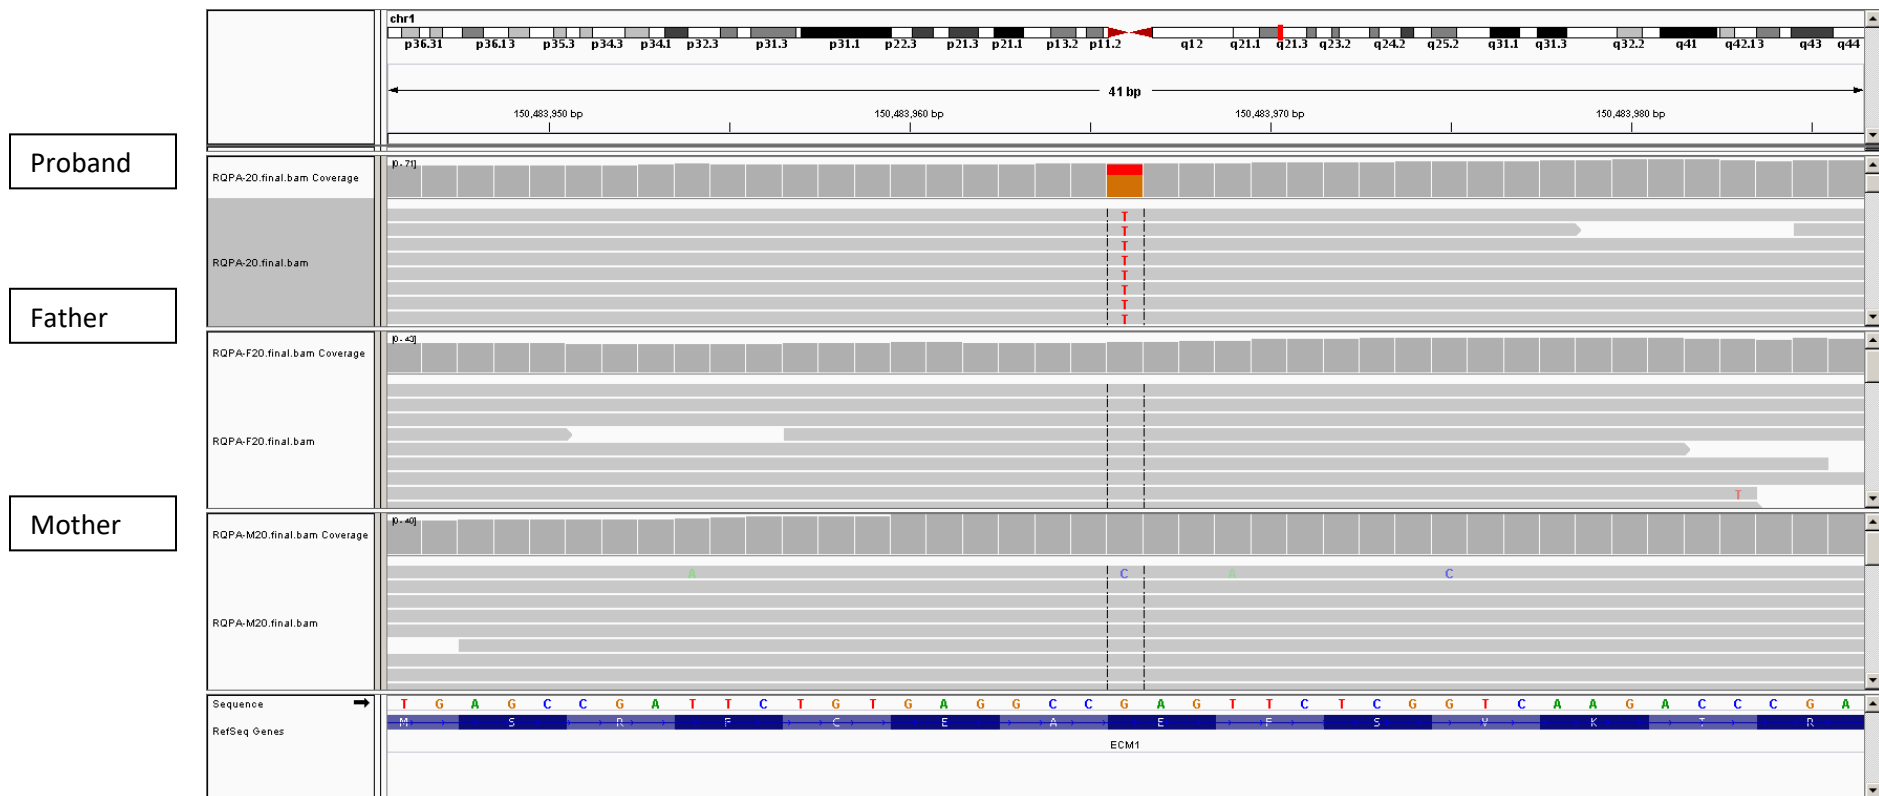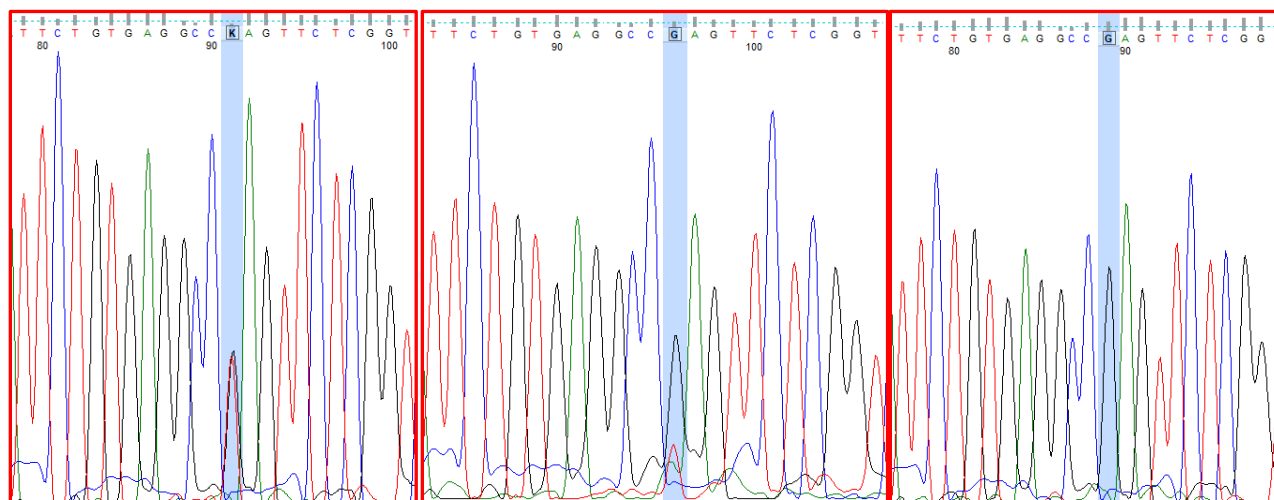

Proband

Father

Mother

#### 4. RQPA20: SLAMF7

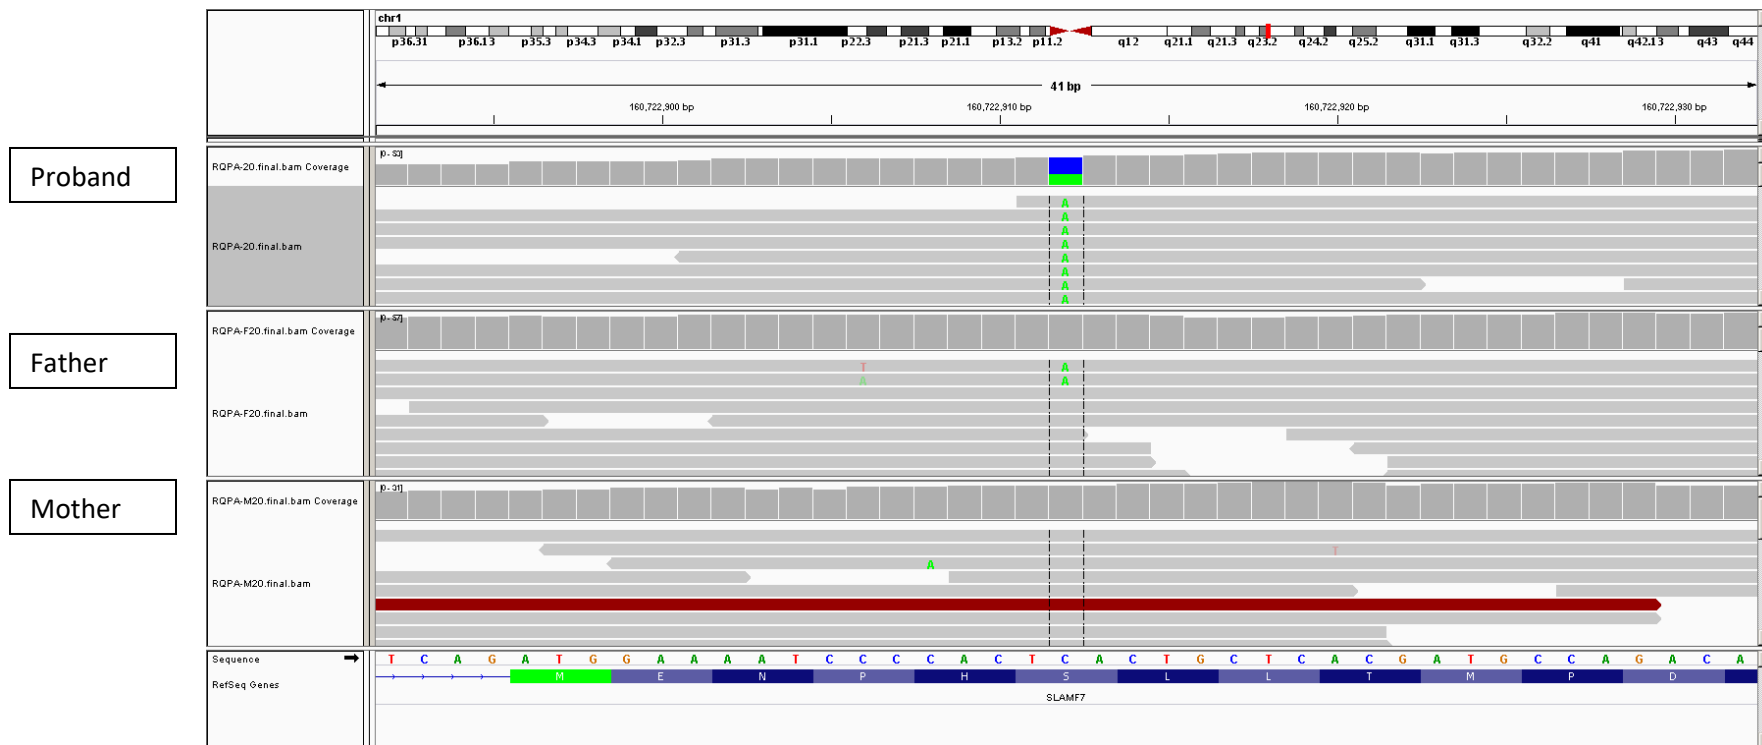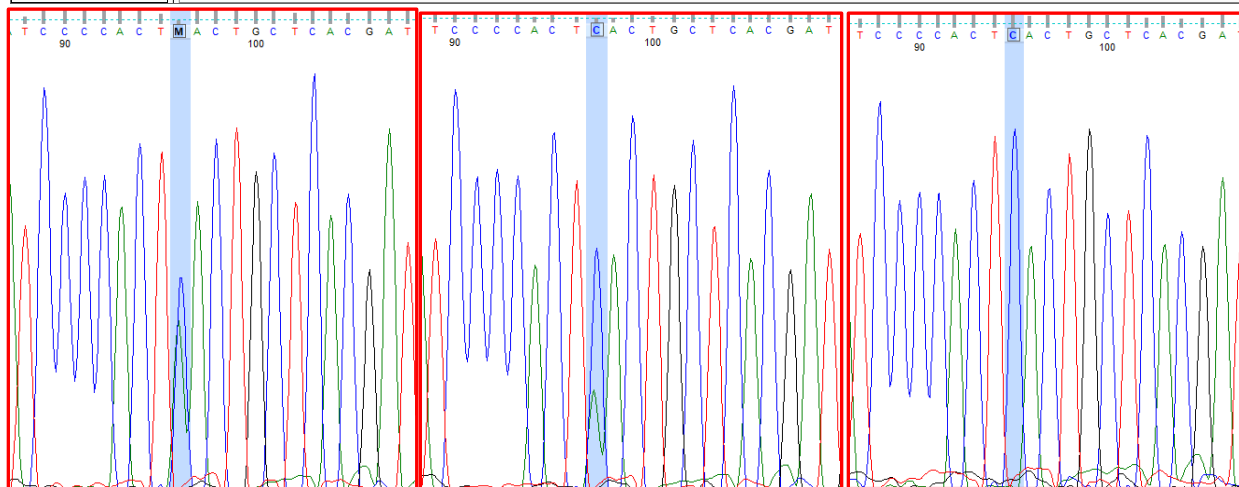

Proband

Father

Mother

5. IAU29: MYT1L

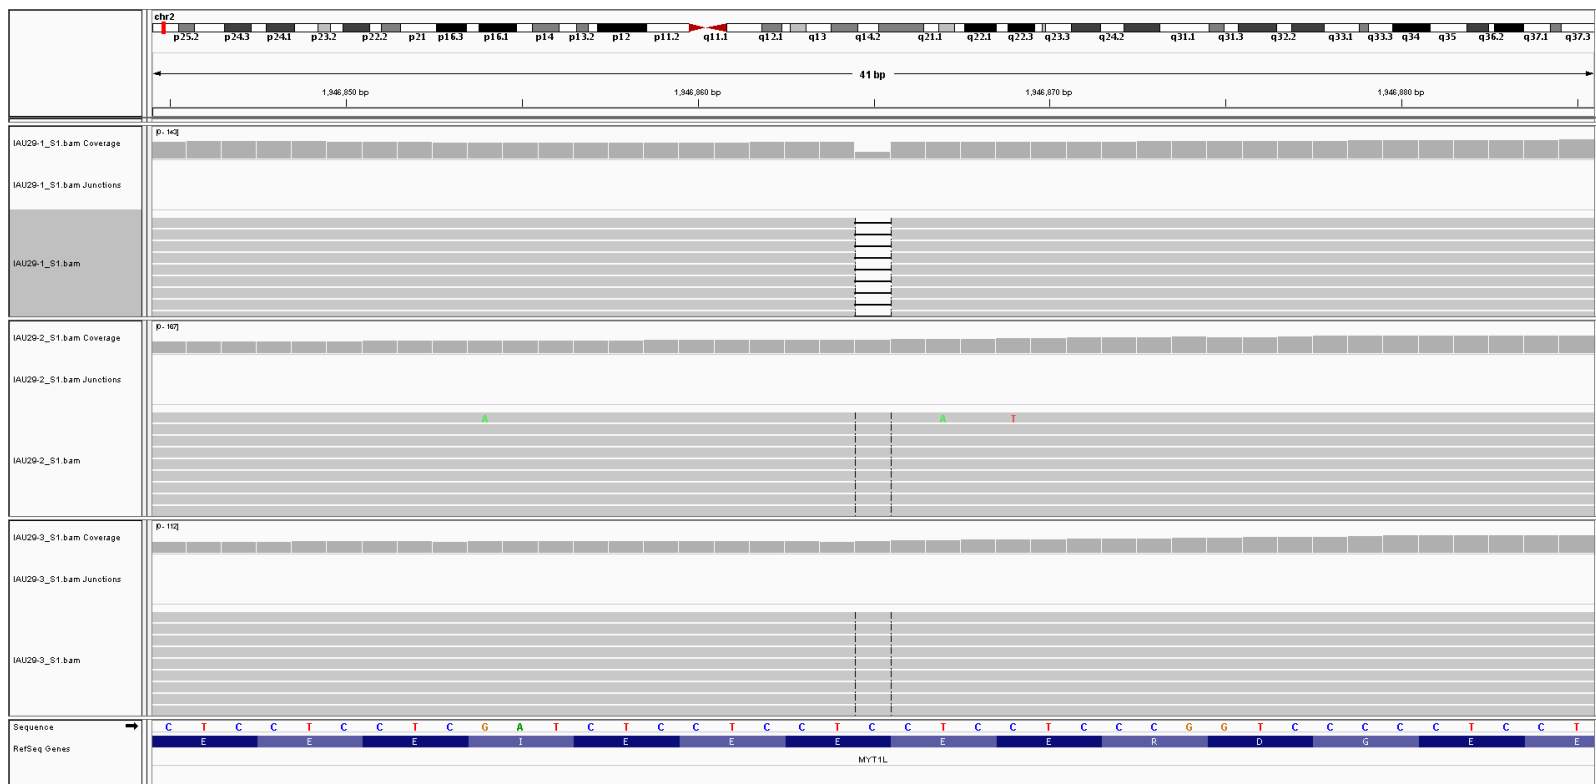

Proband

Father

Mother

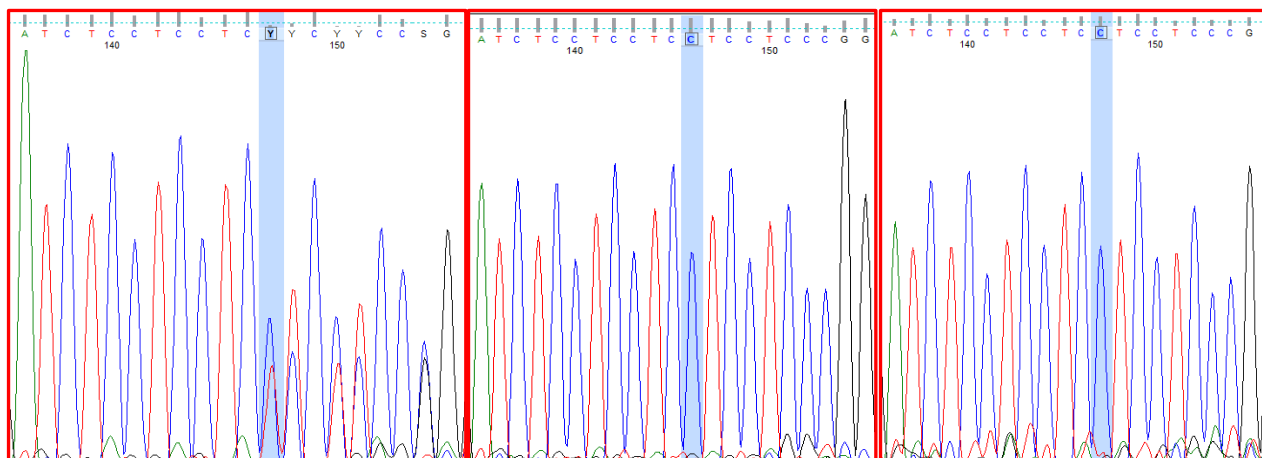

Proband

Father

Mother

## 6. SMPA53: SCN2A

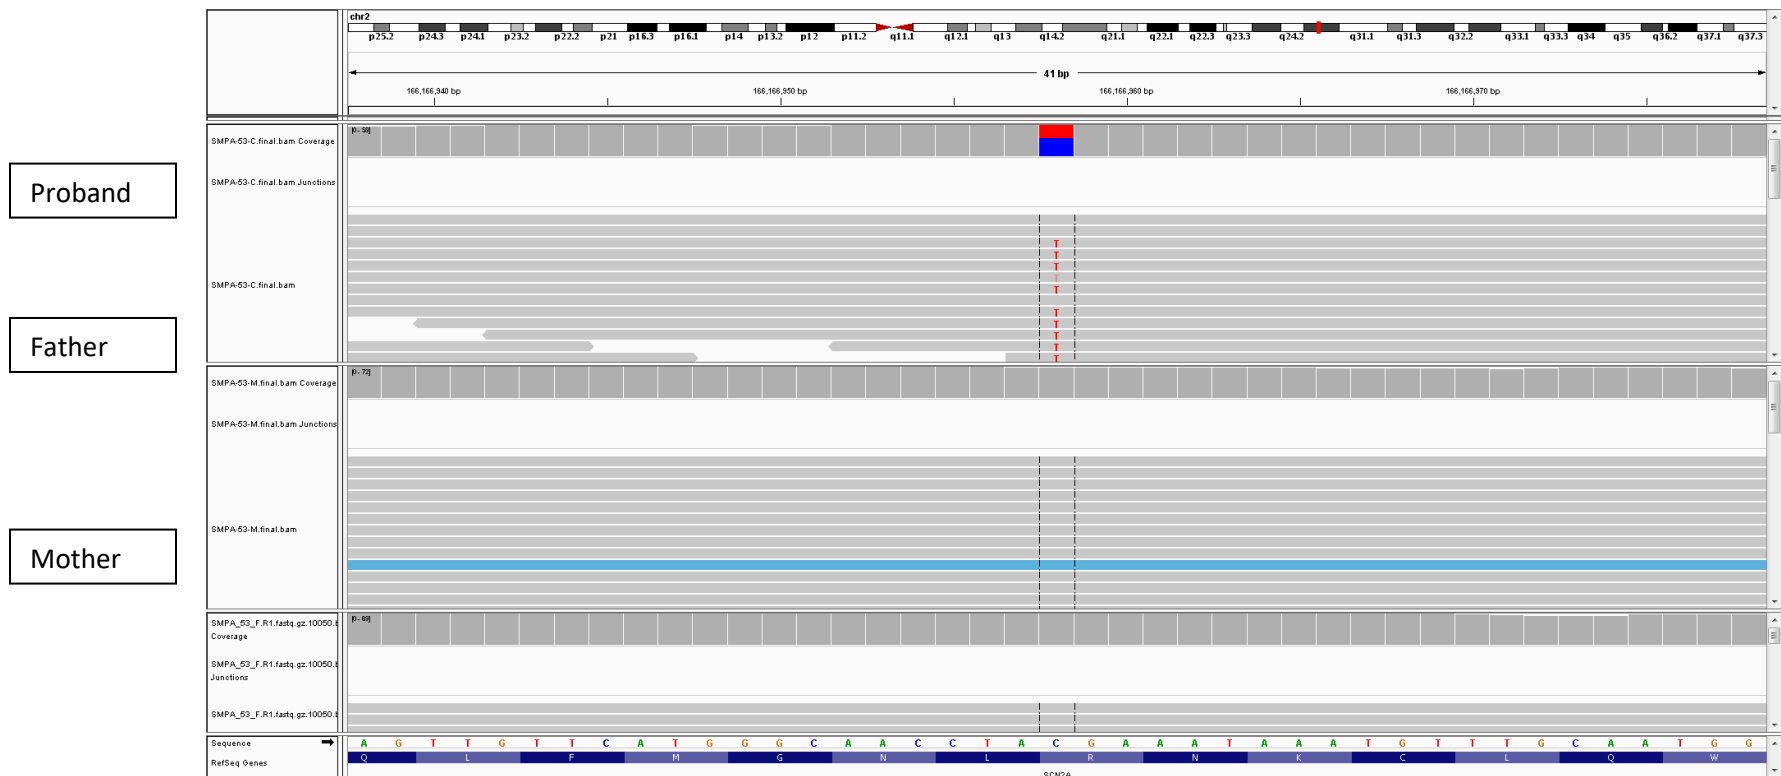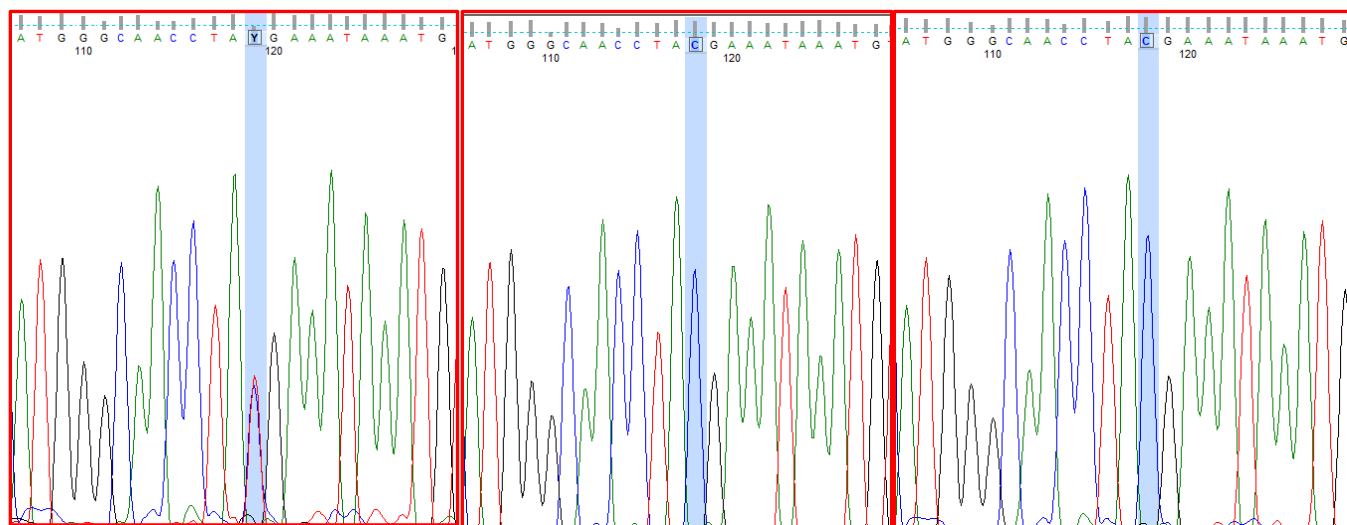

Proband

Father

Mother



# 7. SMPA38: SCN2A

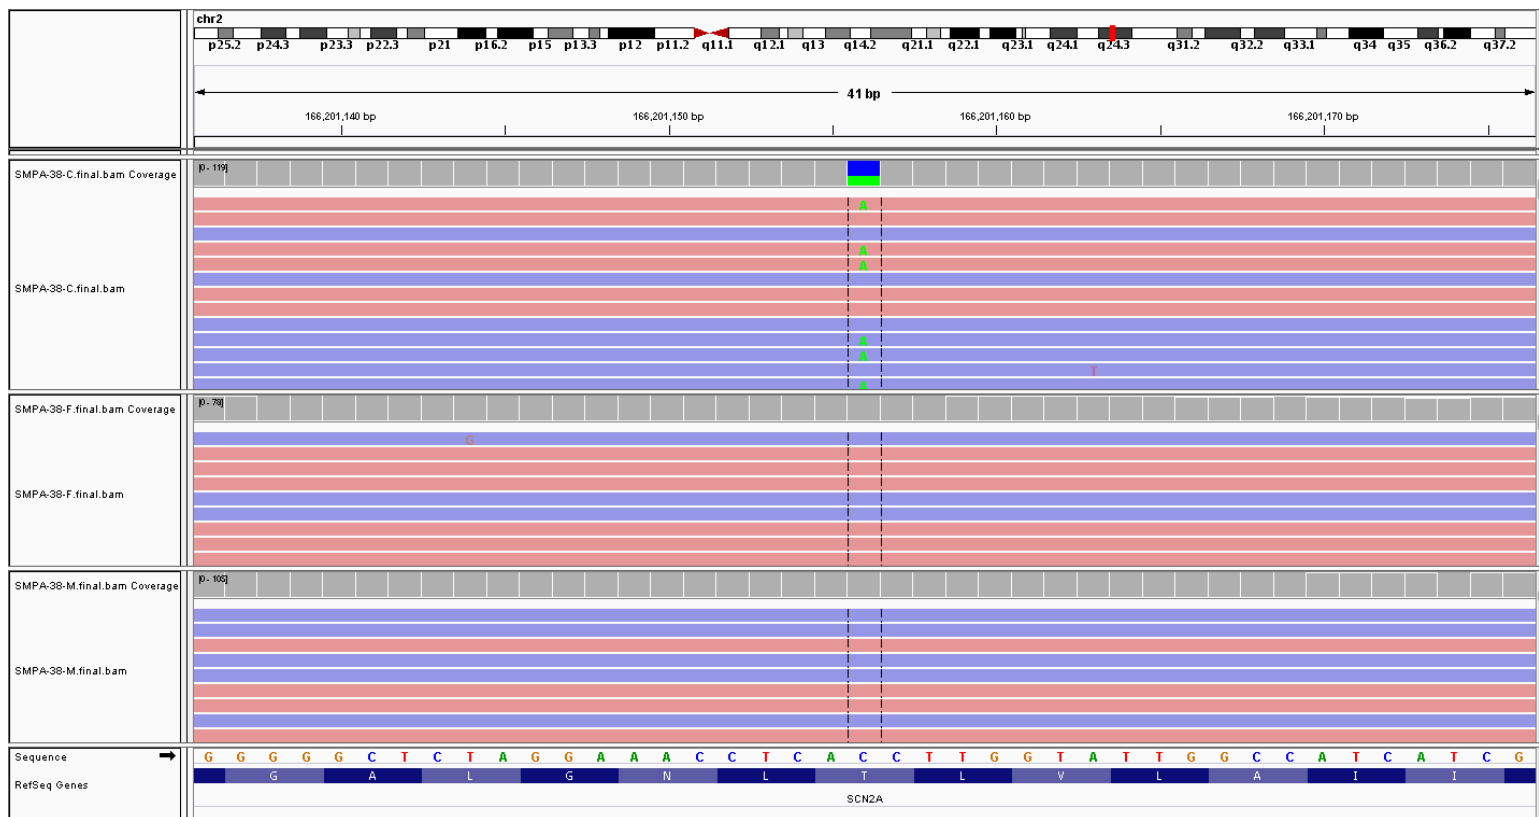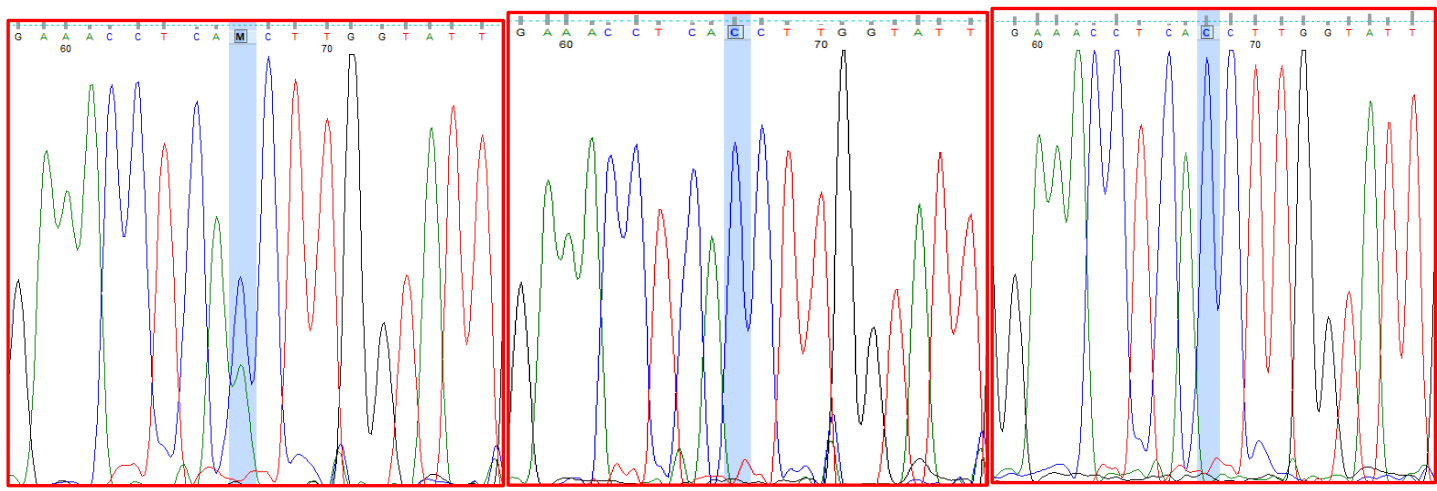

Proband

Father

Mother

8. IAU66: NCL

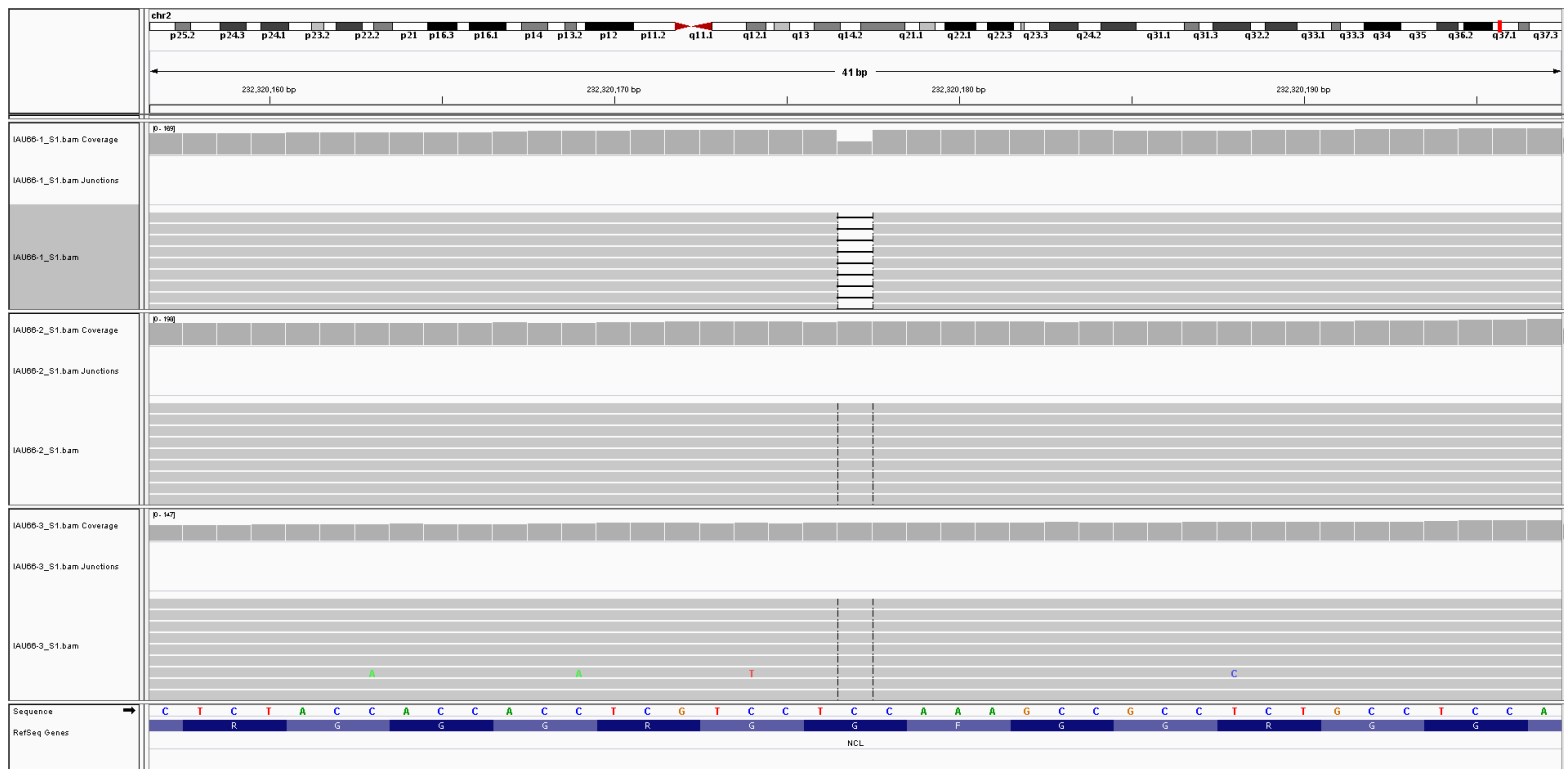

Proband

Father

Mother

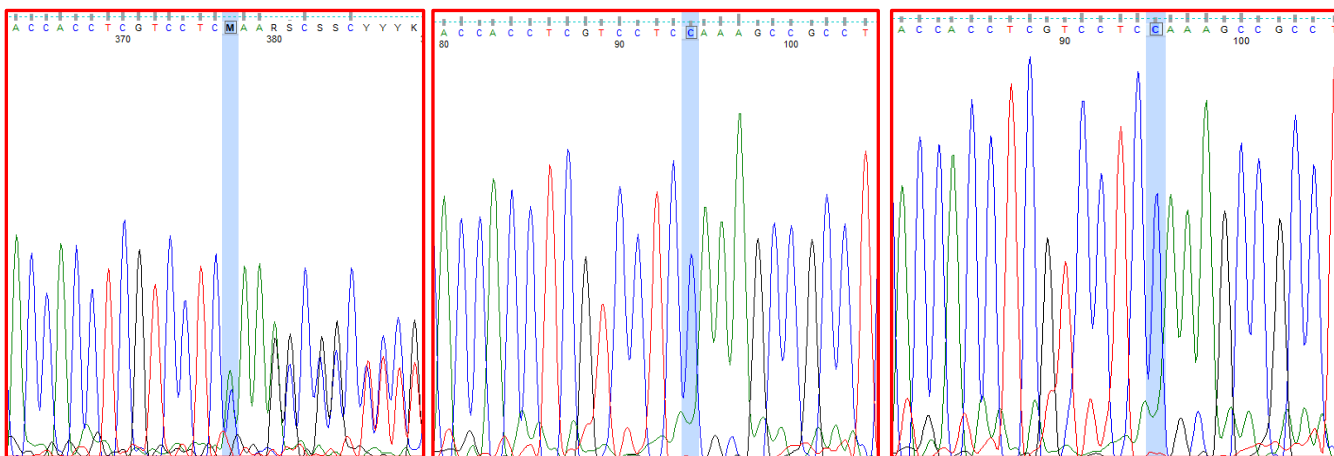

Proband

Father

Mother

# 9. SMPA75: FAM53C

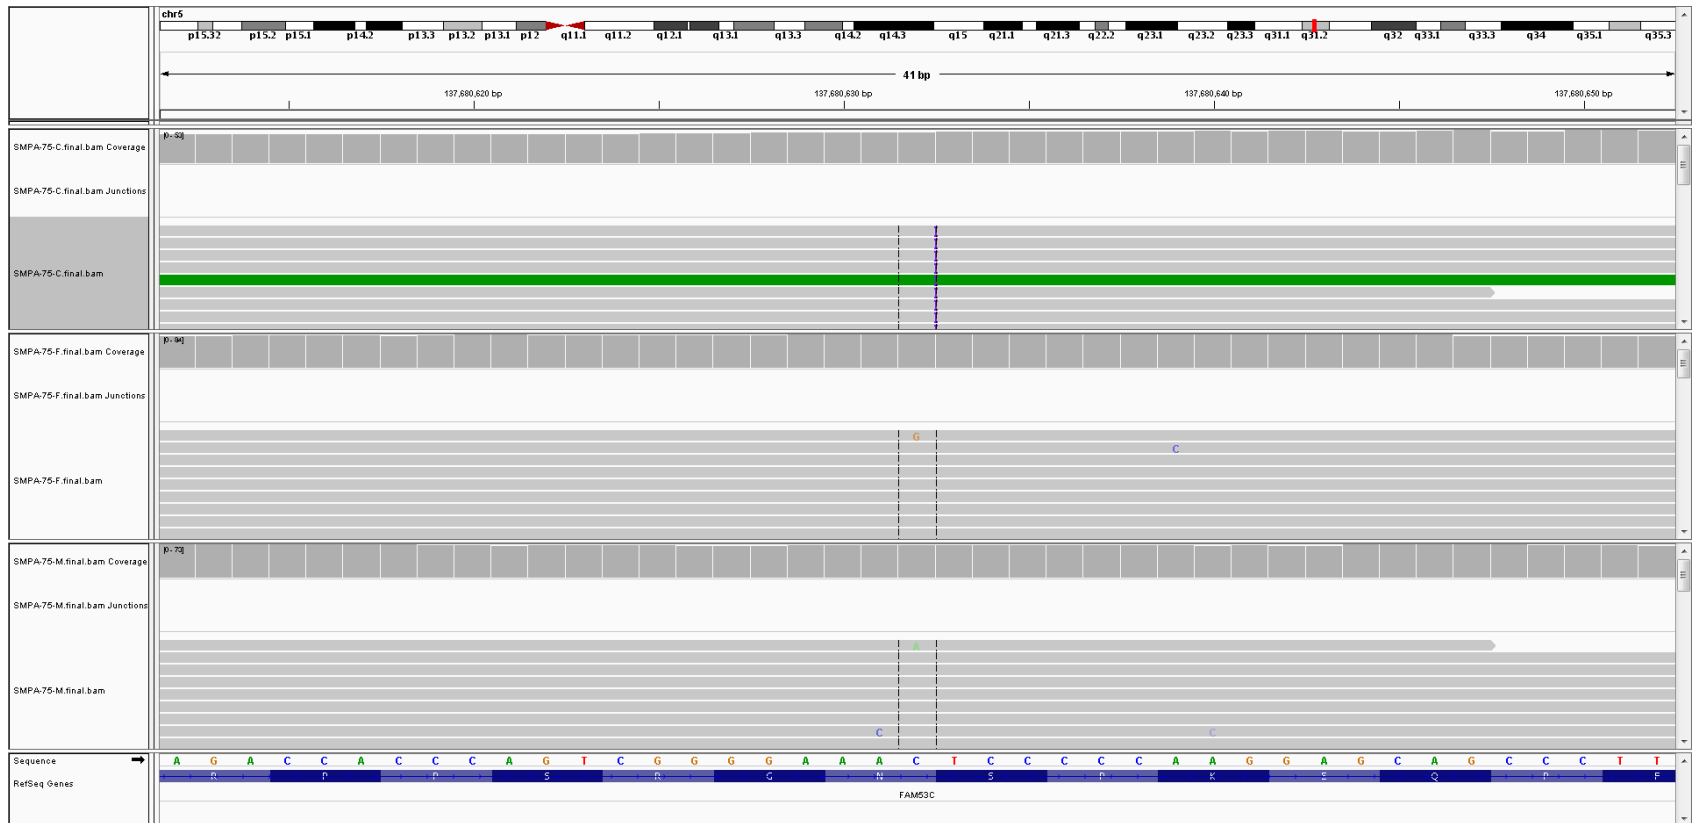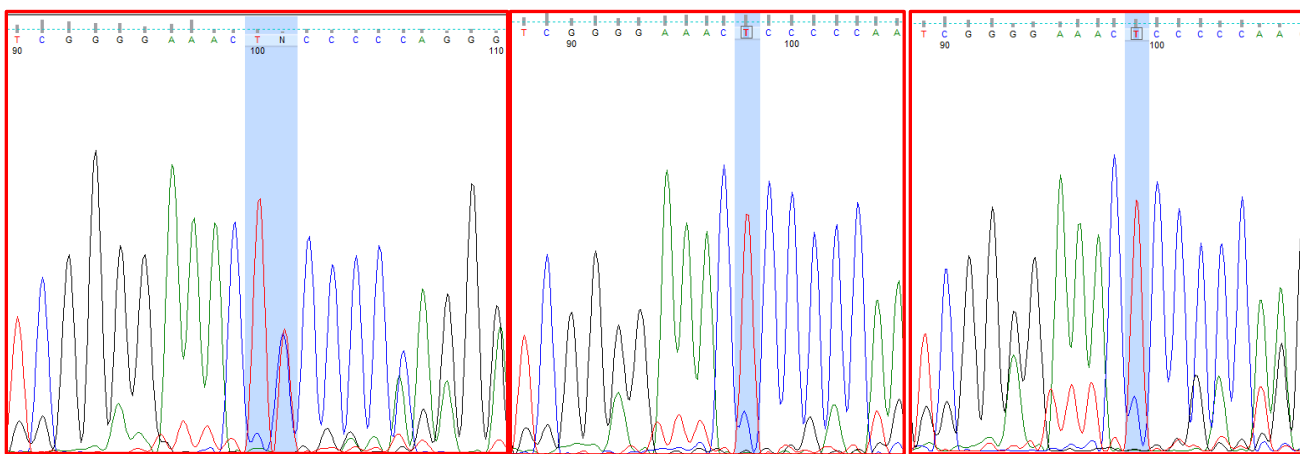

Proband

Father

Mother

# 10. SMPA75: ADGRF2

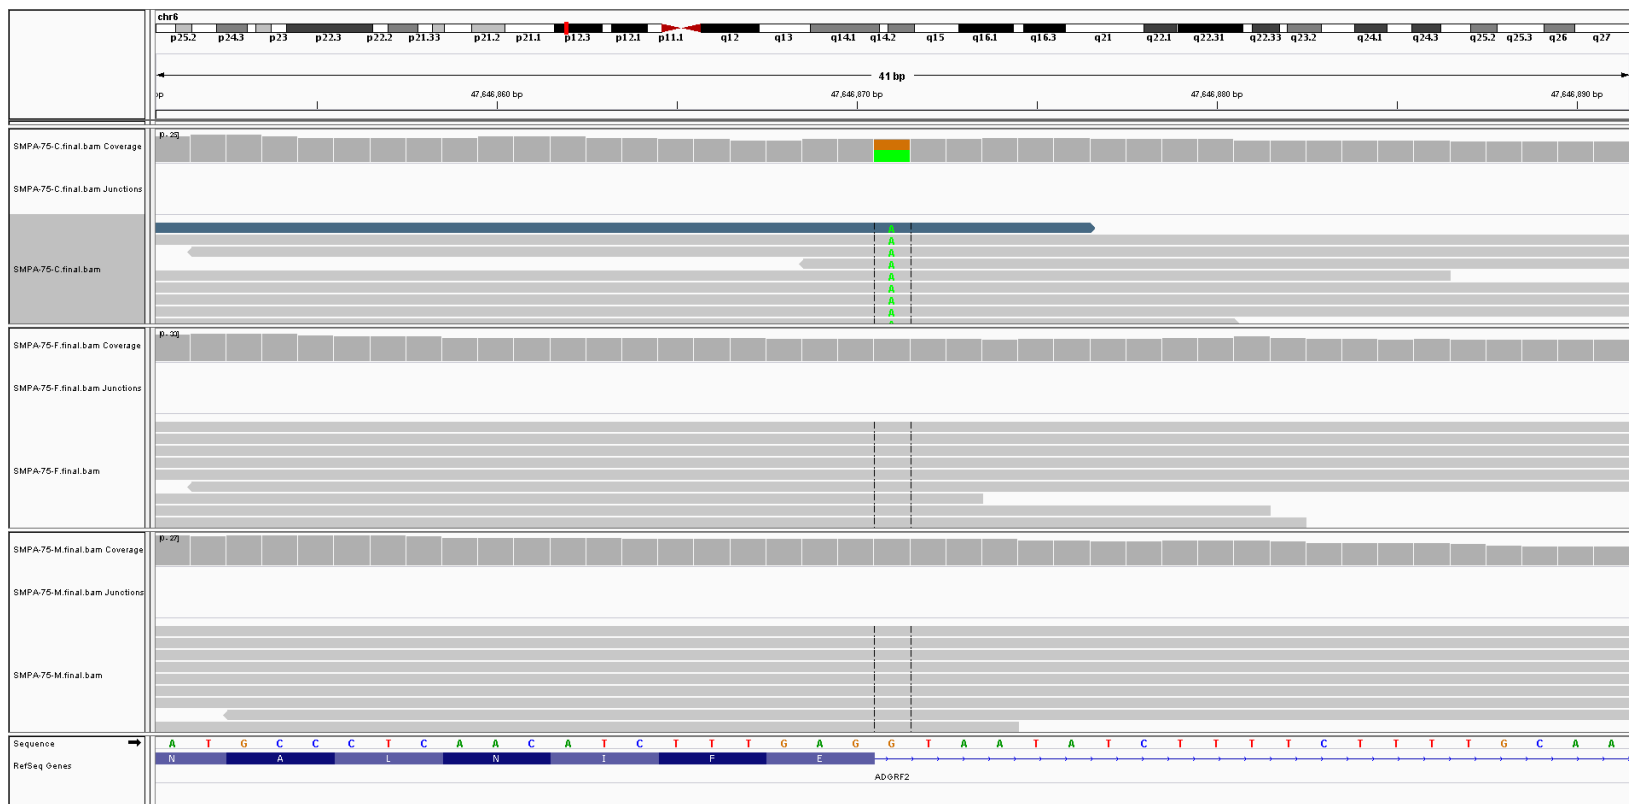

Proband

Father

Mother

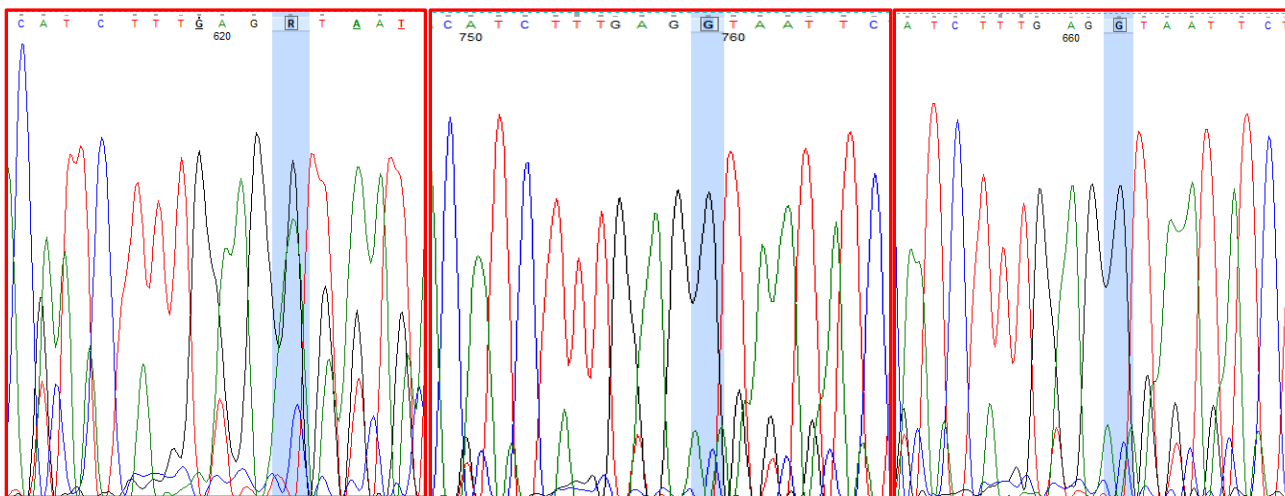

Proband

Father

Mother

# 11. Autism10: ZNF292

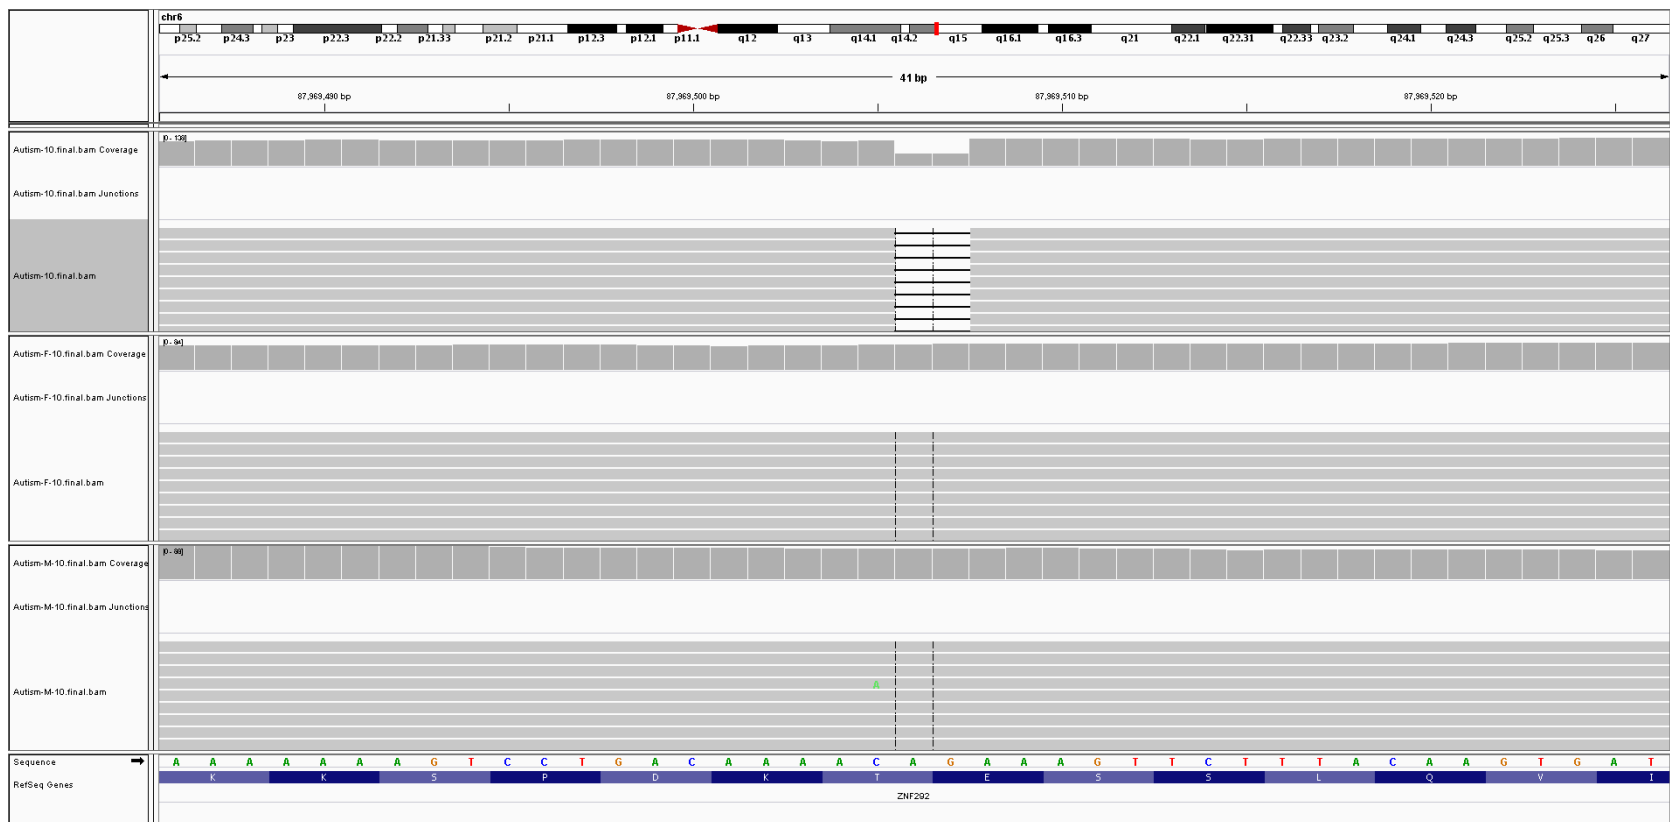

Proband

Father

Mother

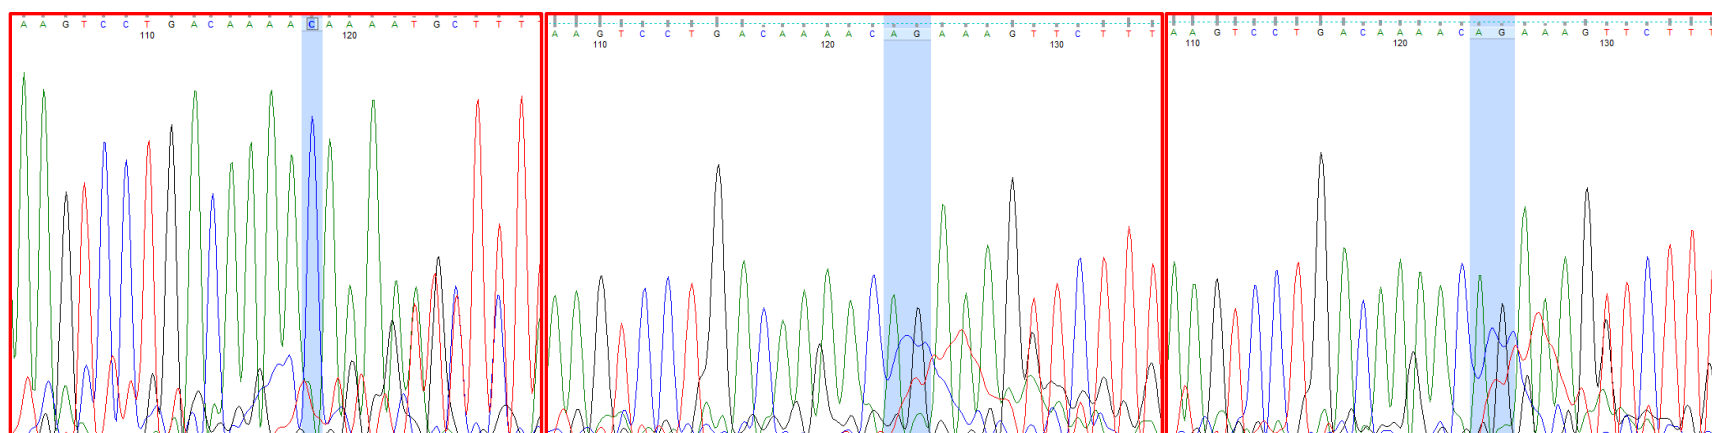

Proband

Father

Mother

12. IAU65: ZNF292

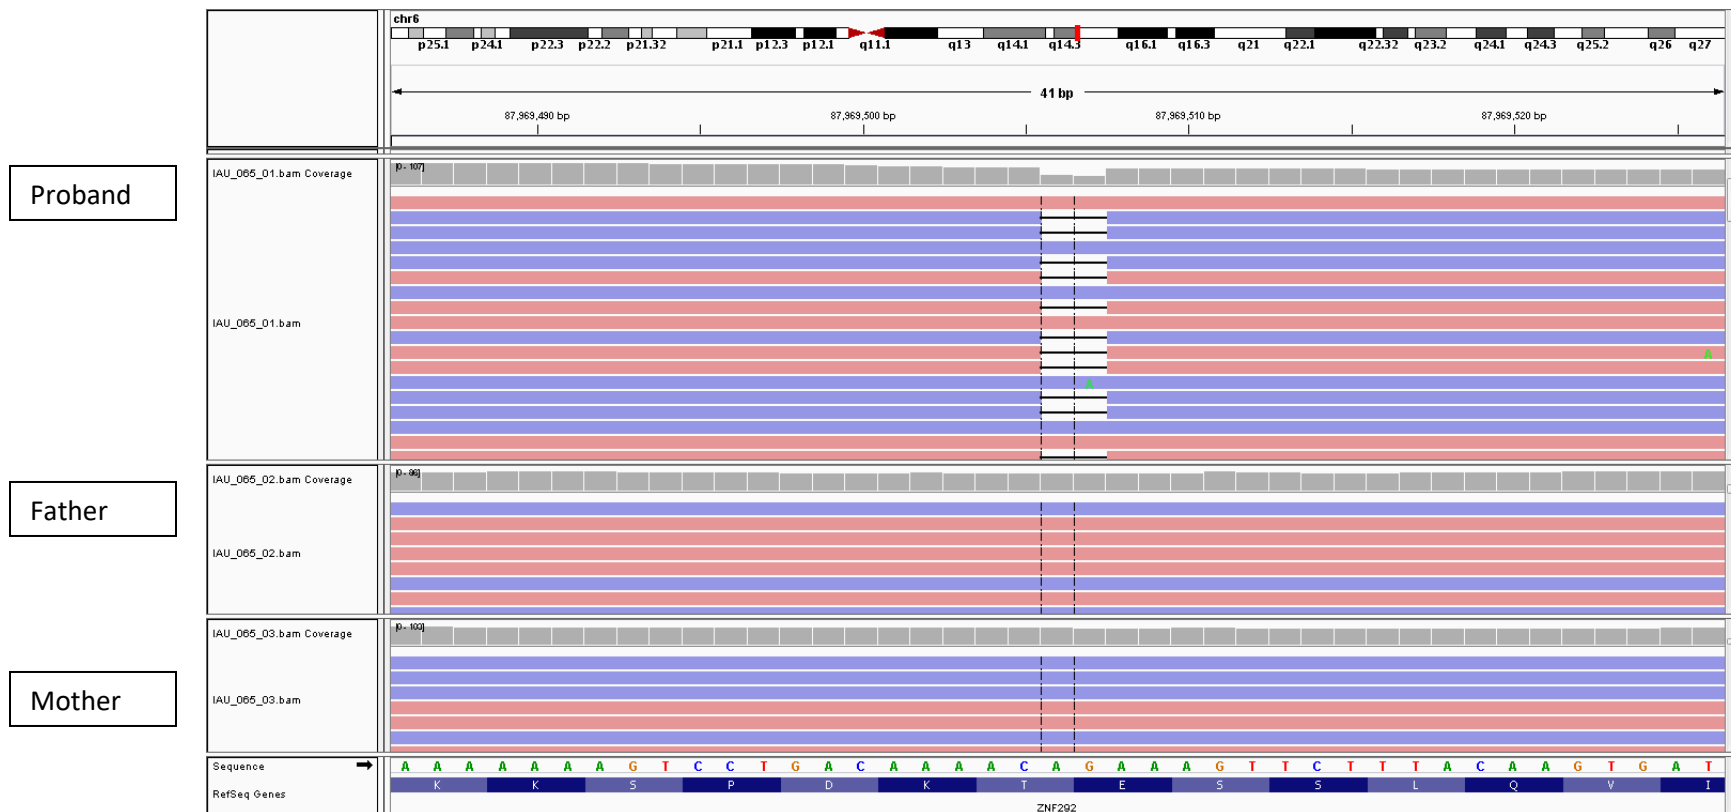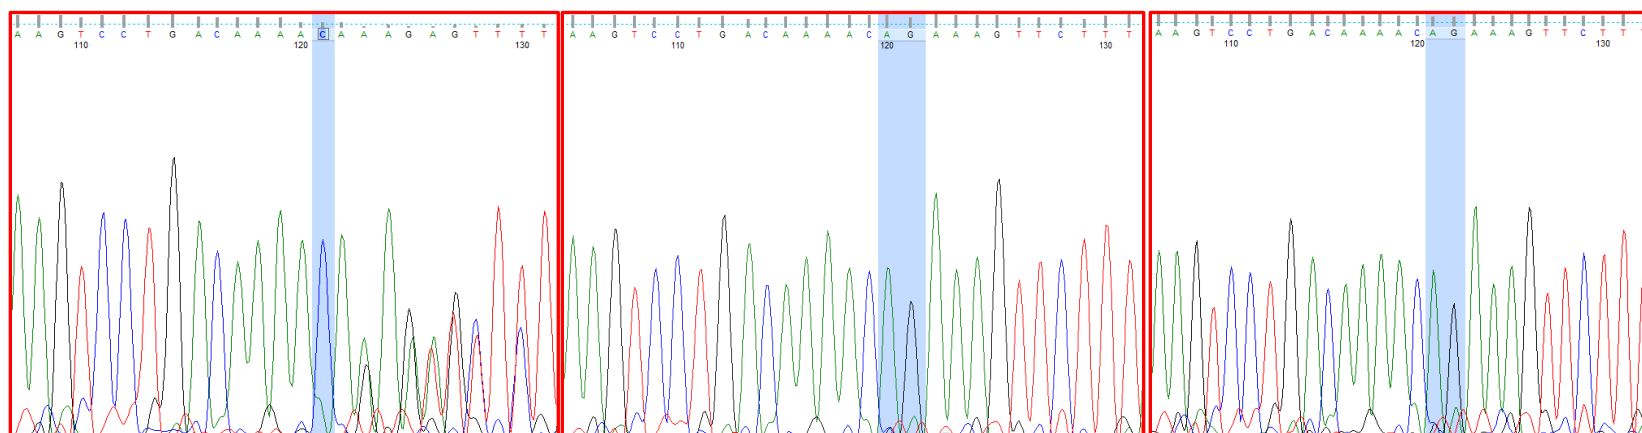

Proband

Father

Mother

13. RQPA20: *DGKZ*

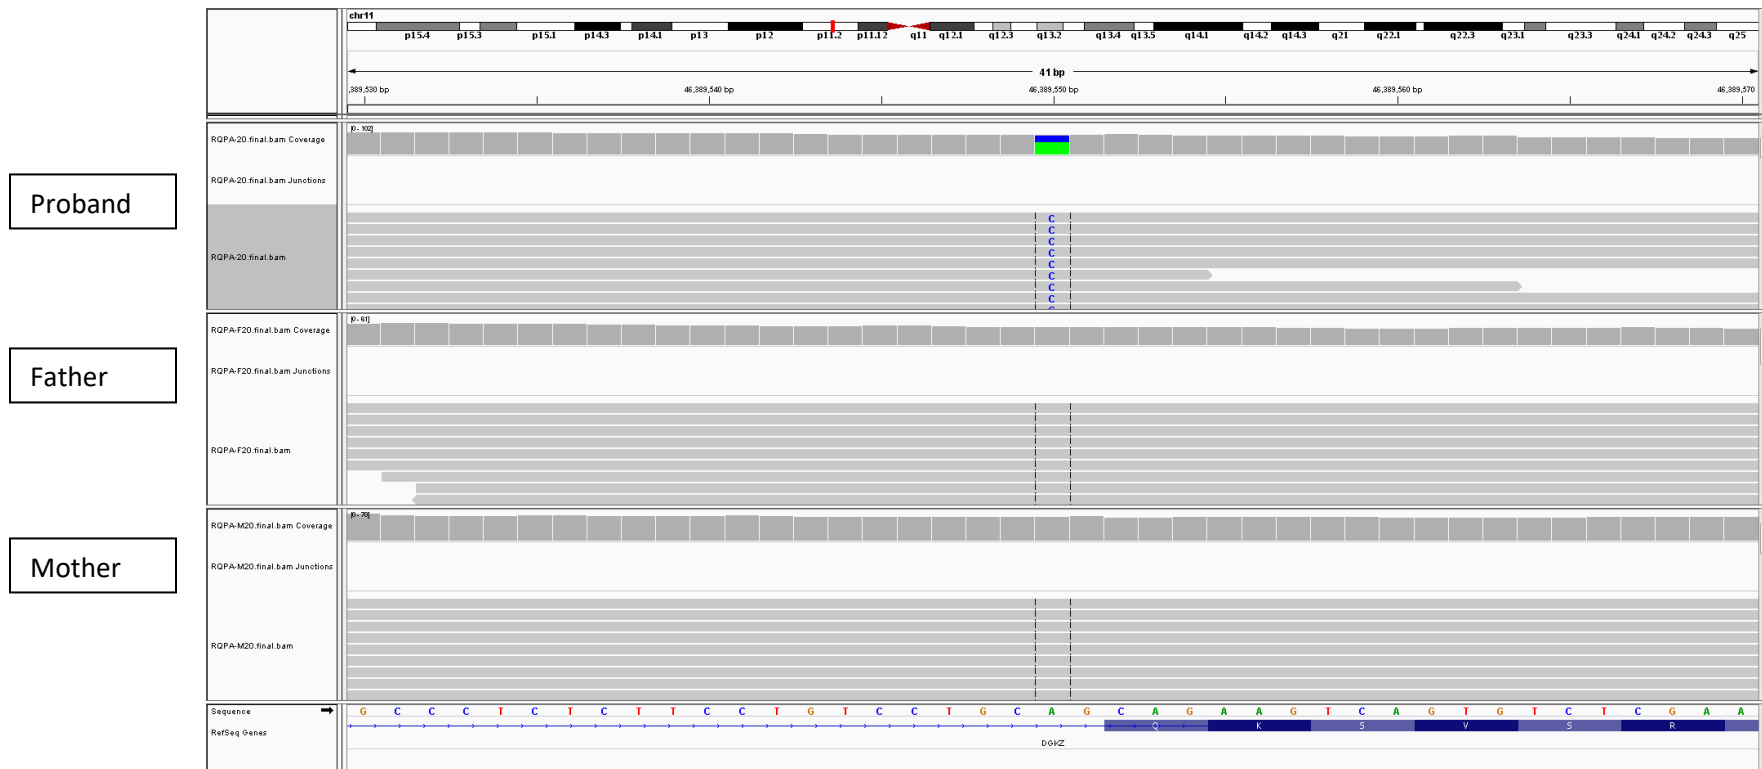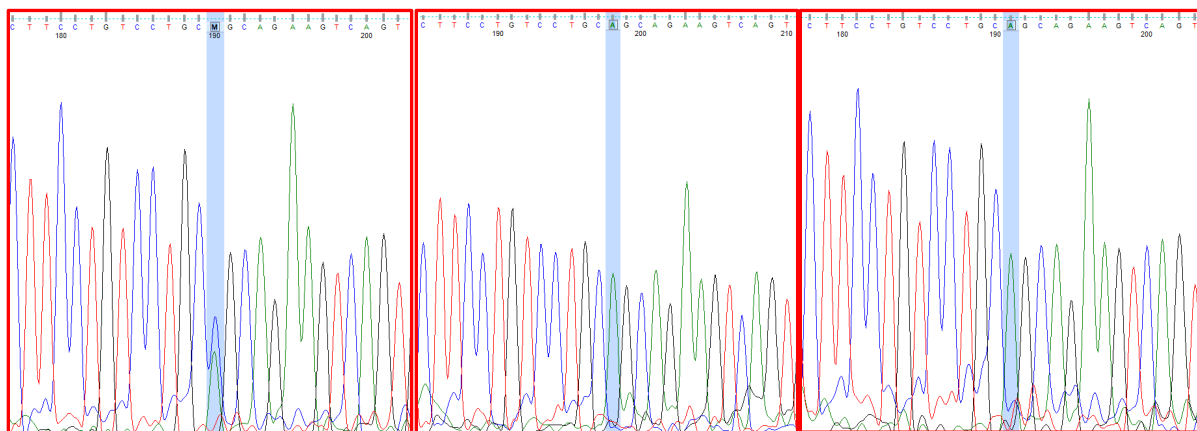

Proband

Father

Mother

14. SMPA39: *CLEC4E*

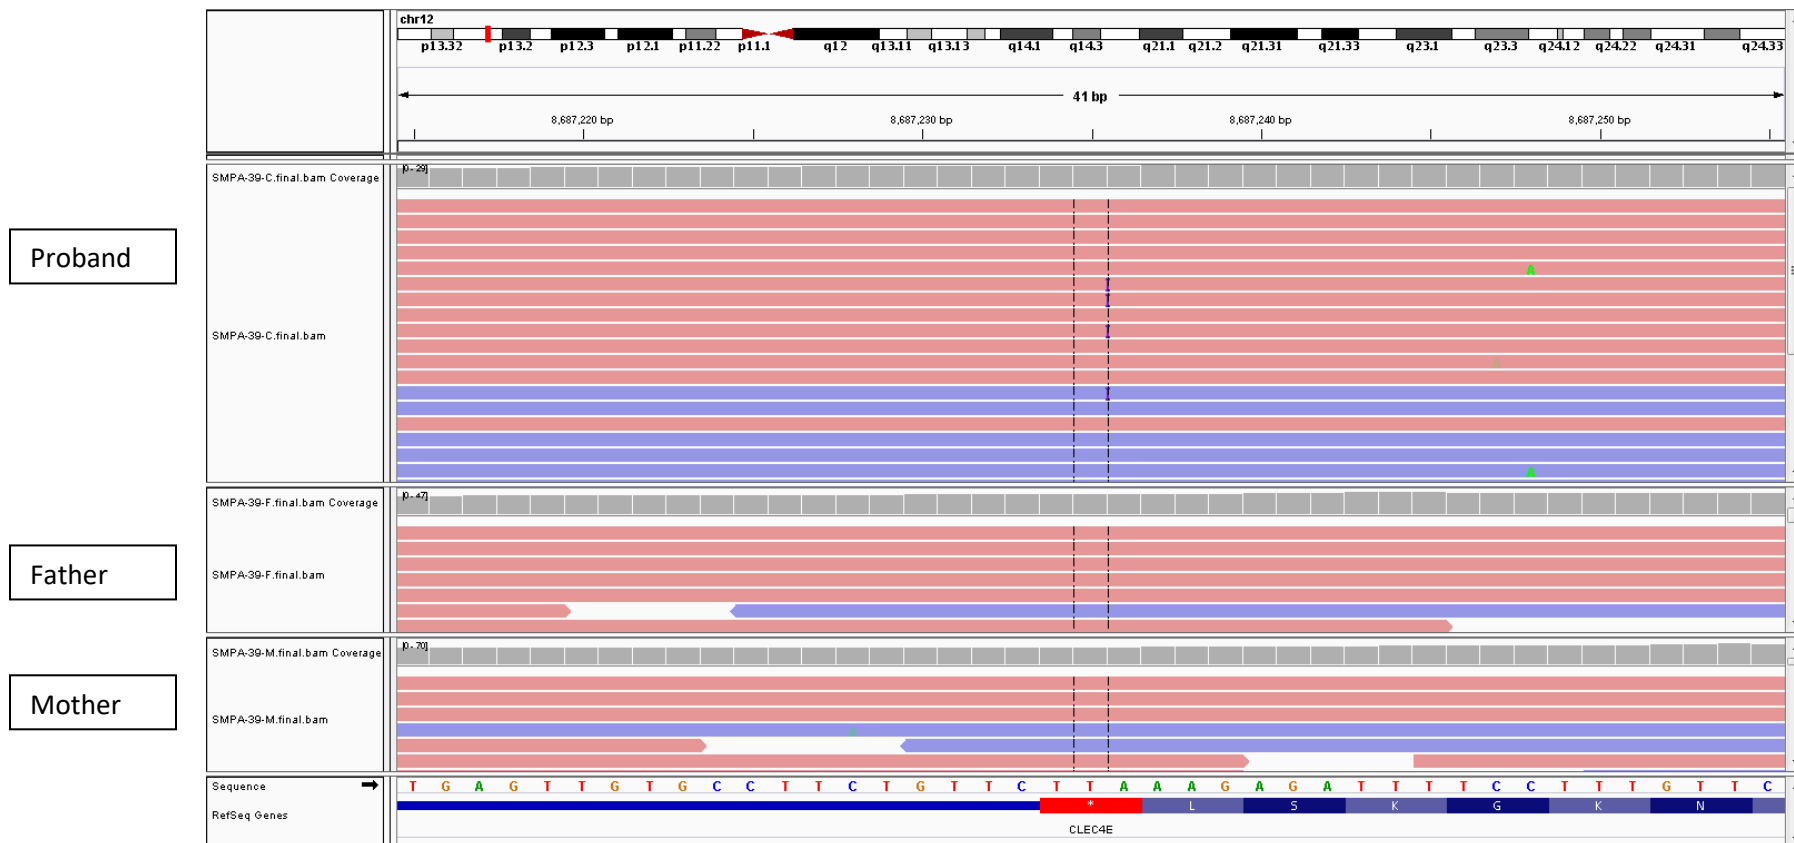

Sanger sequencing not done- DNA exhausted.



15. SMPA73: *ATP2B1*

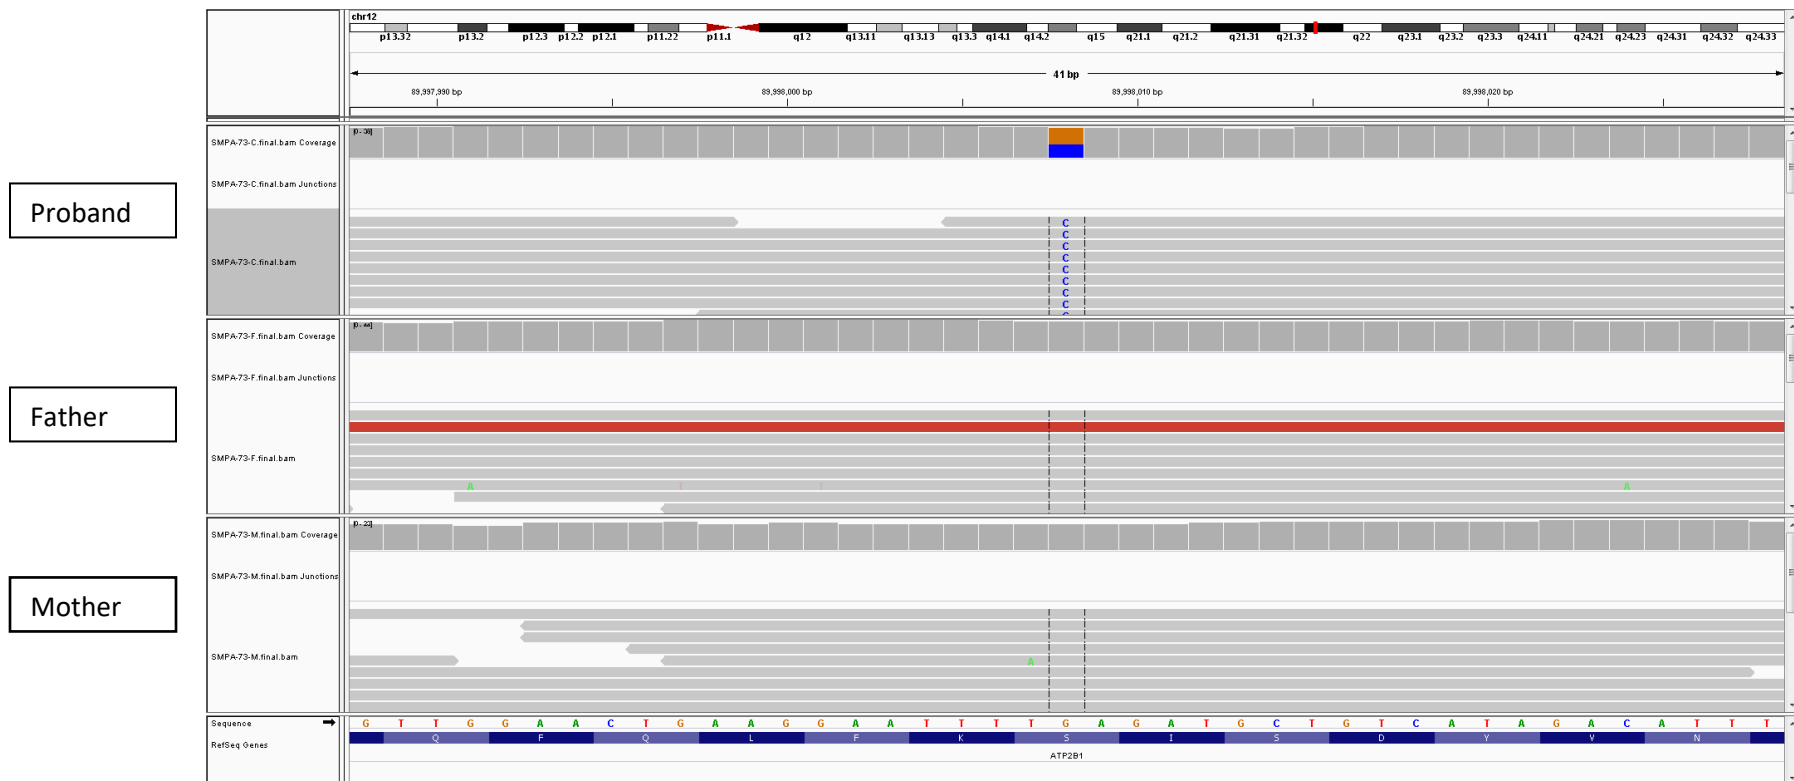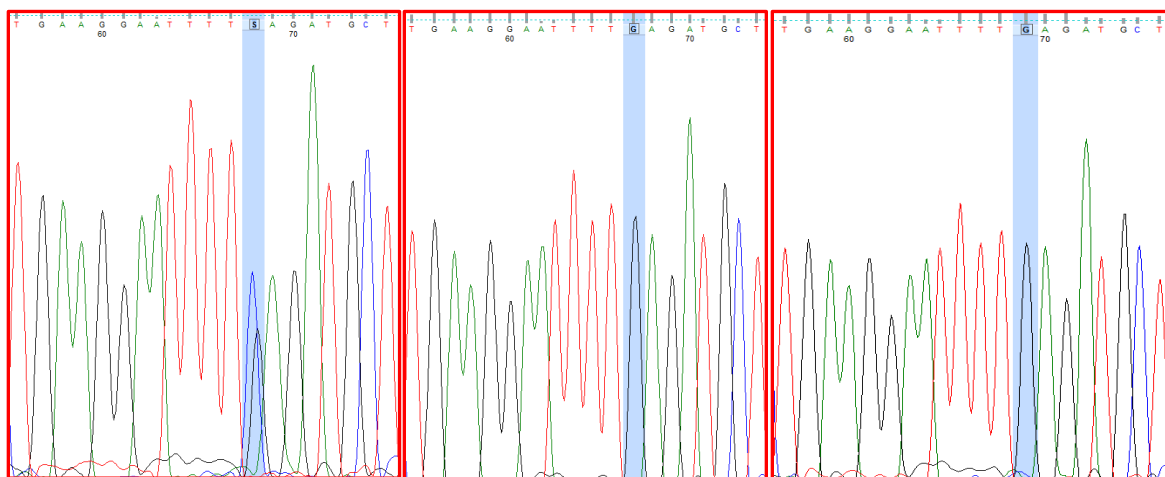

Proband

Father

Mother

16. RQPA20: *CBFA2T3*

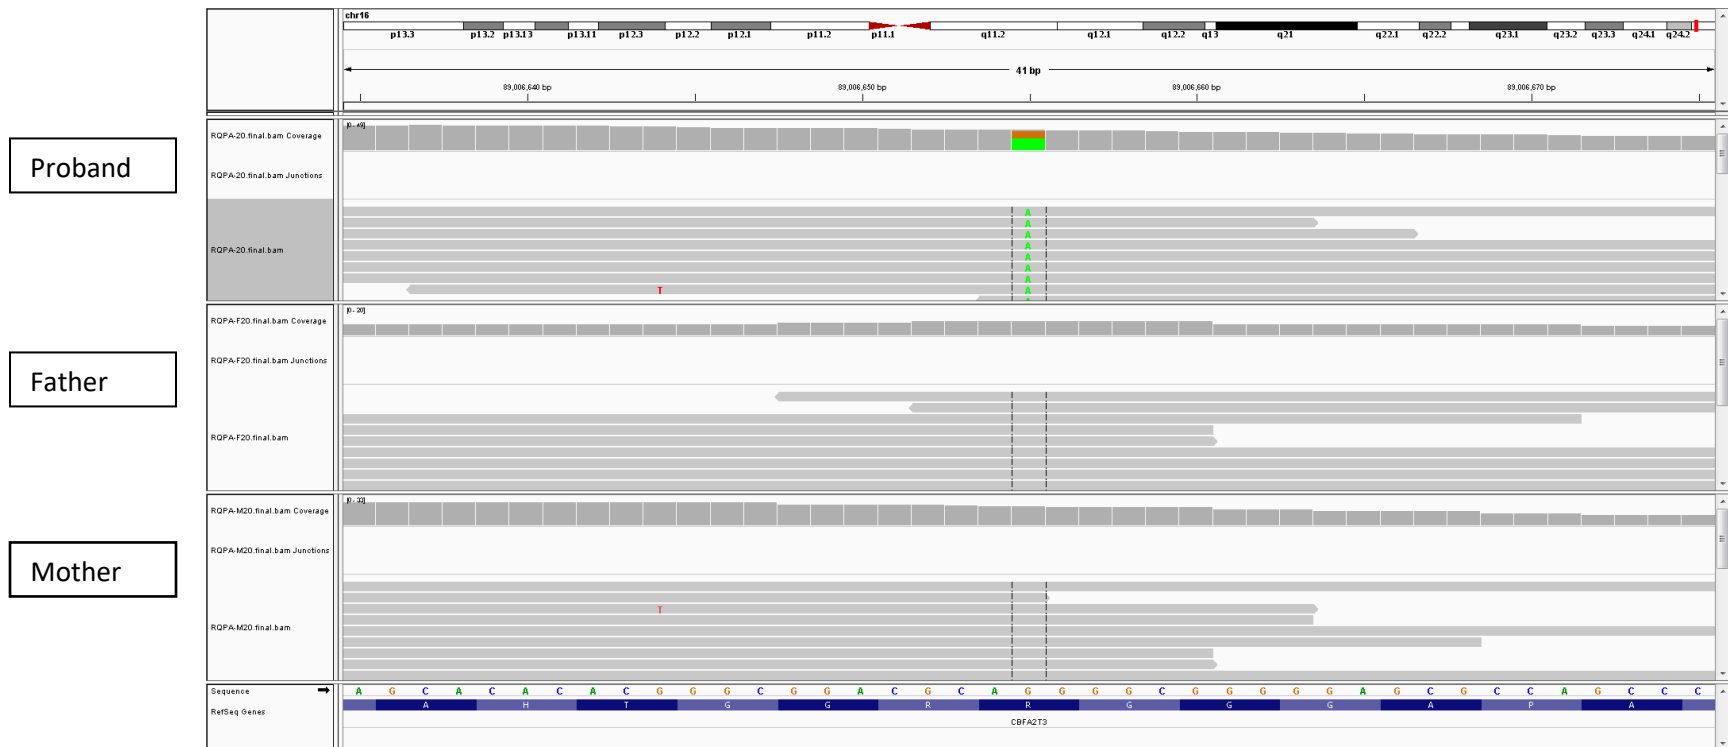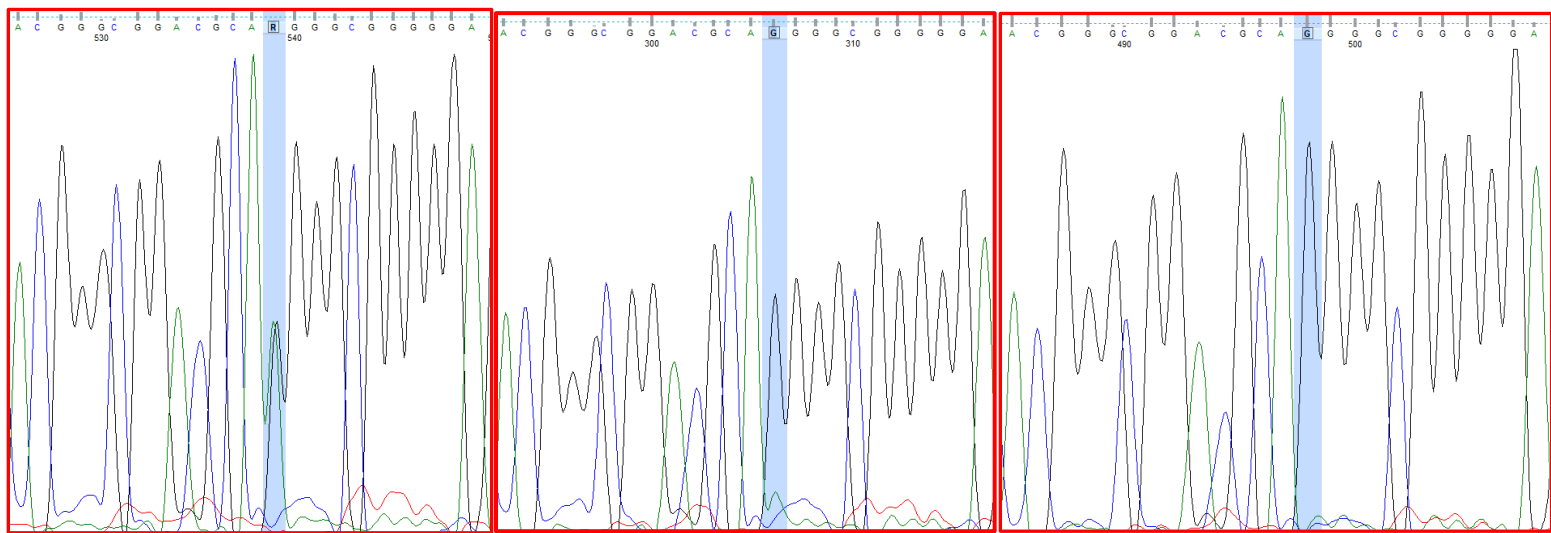

Proband

Father

Mother

# 17. SMPA75: RETN

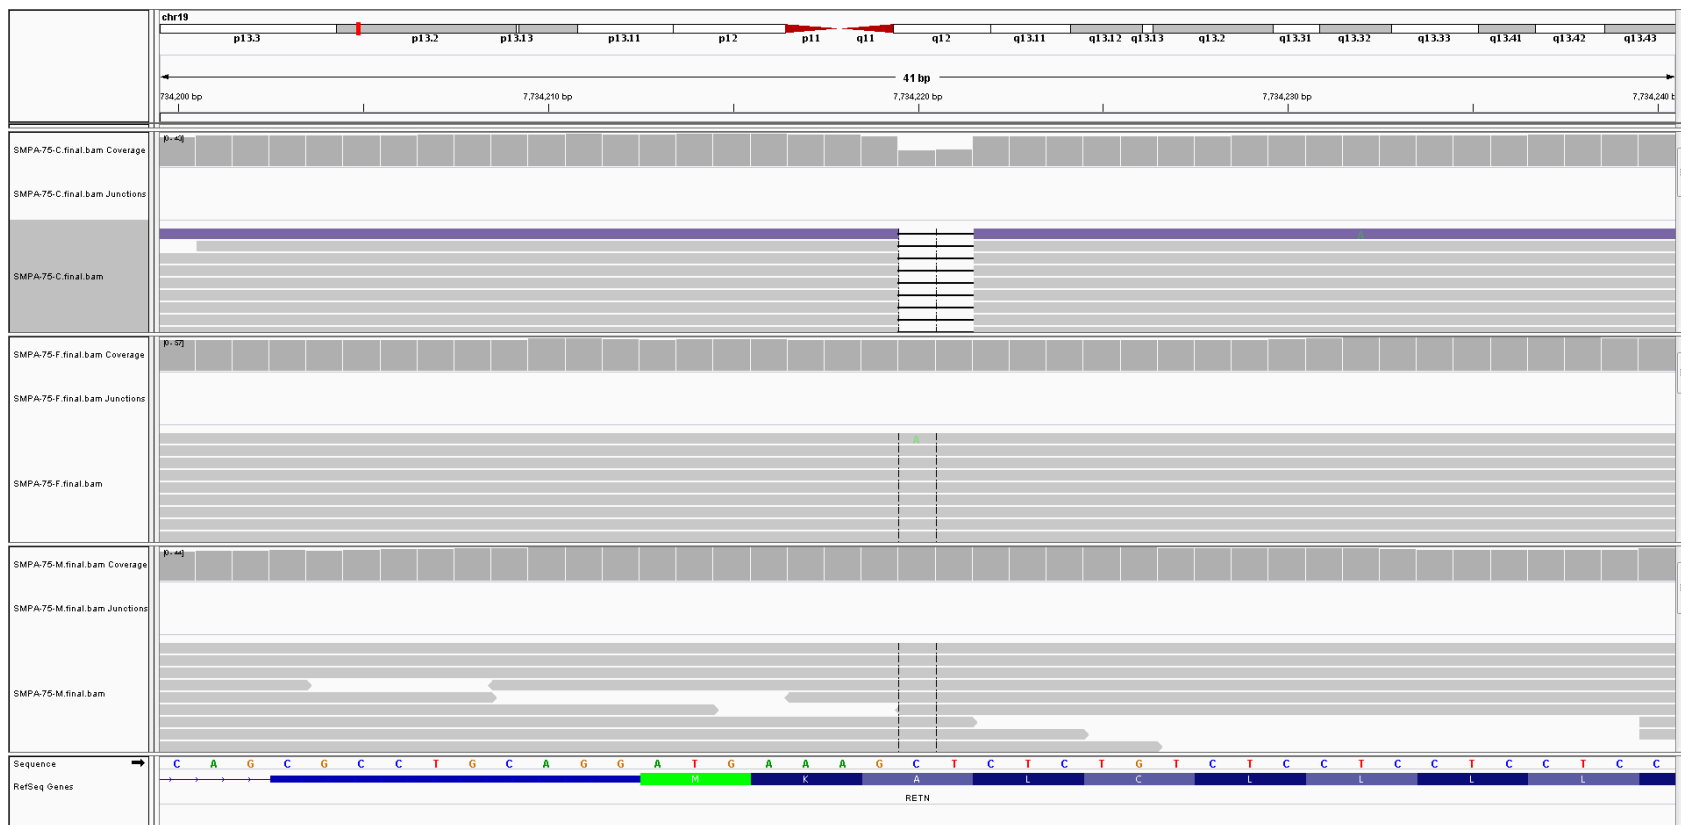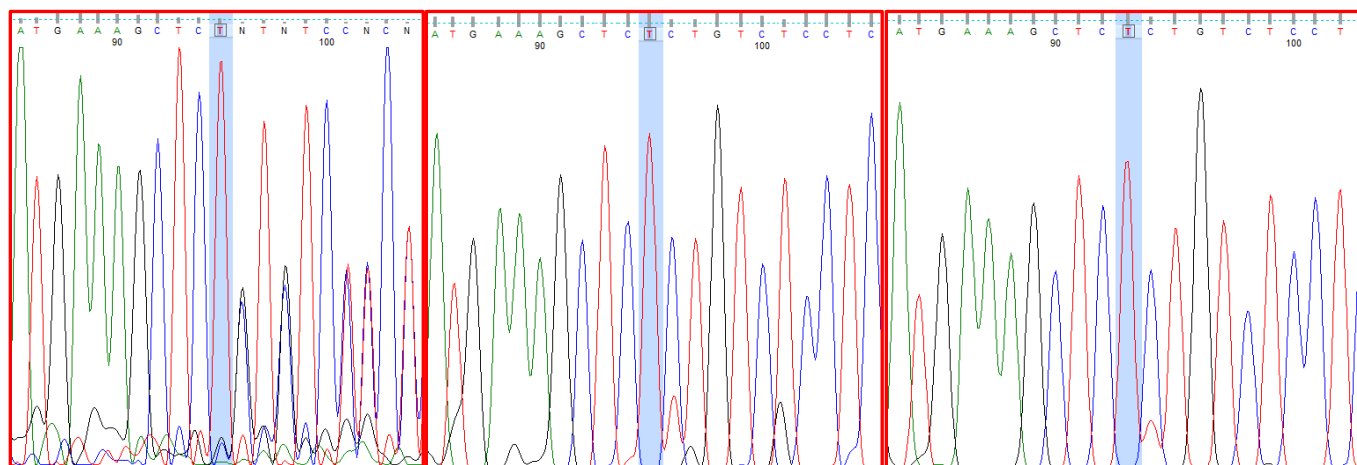

Proband

Father

Mother

RQPA20: *PPIL2*

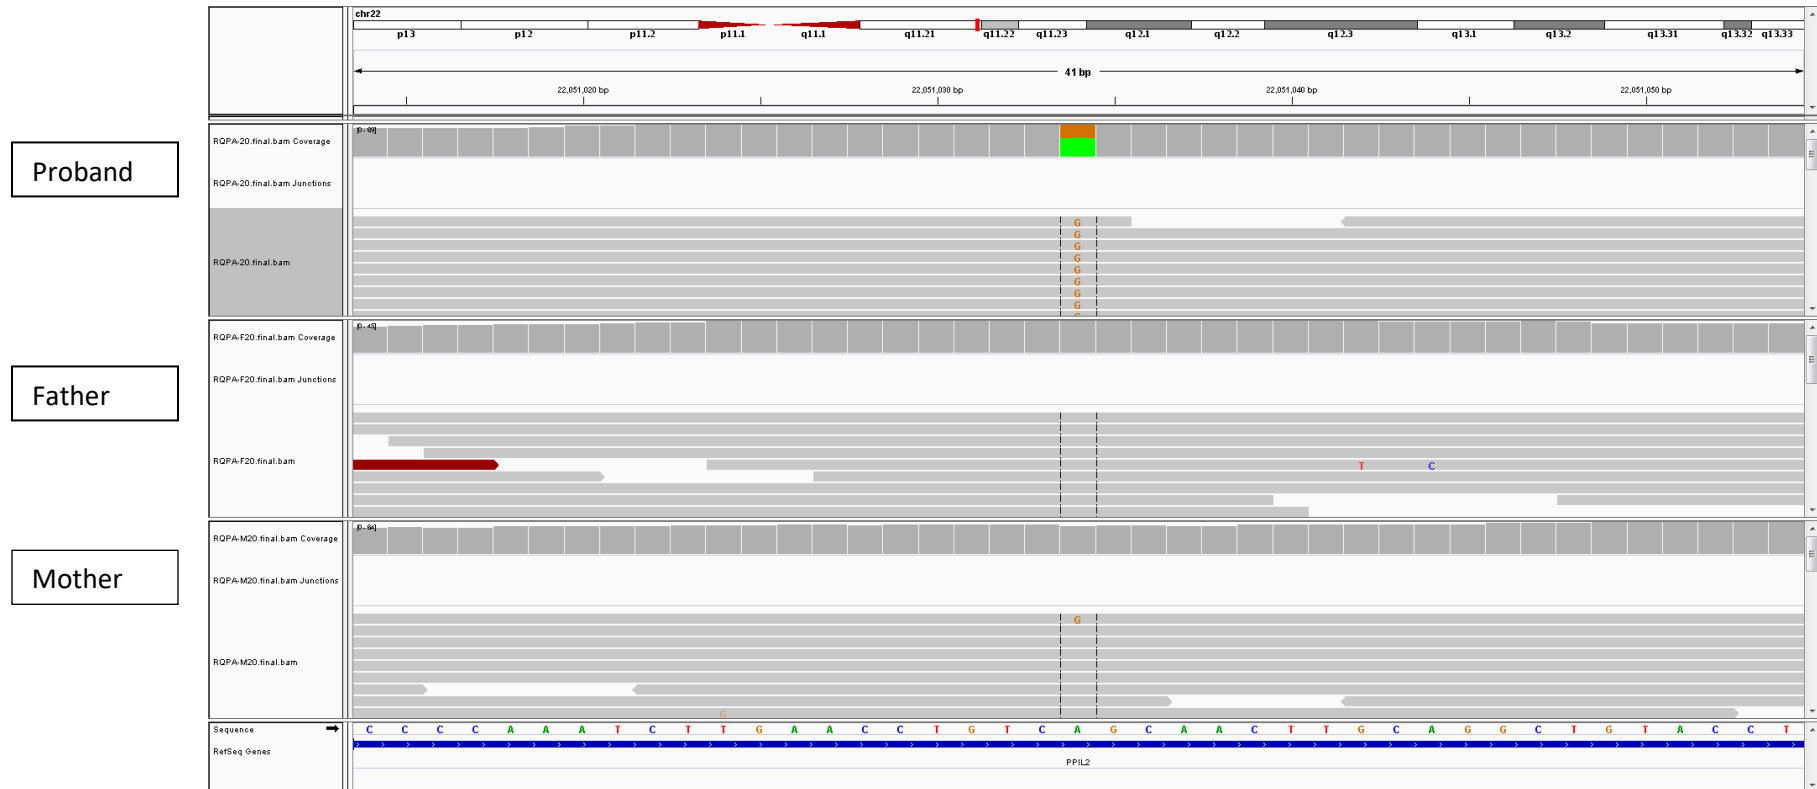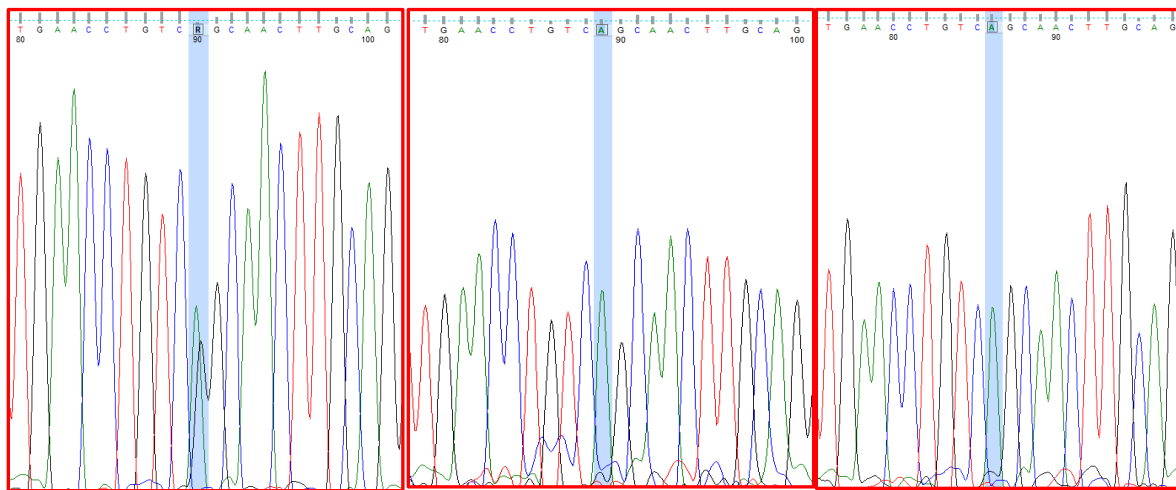

Proband

Father

Mother

**Table 4: X-linked variants**

1. SMPA43: *EGFL6*

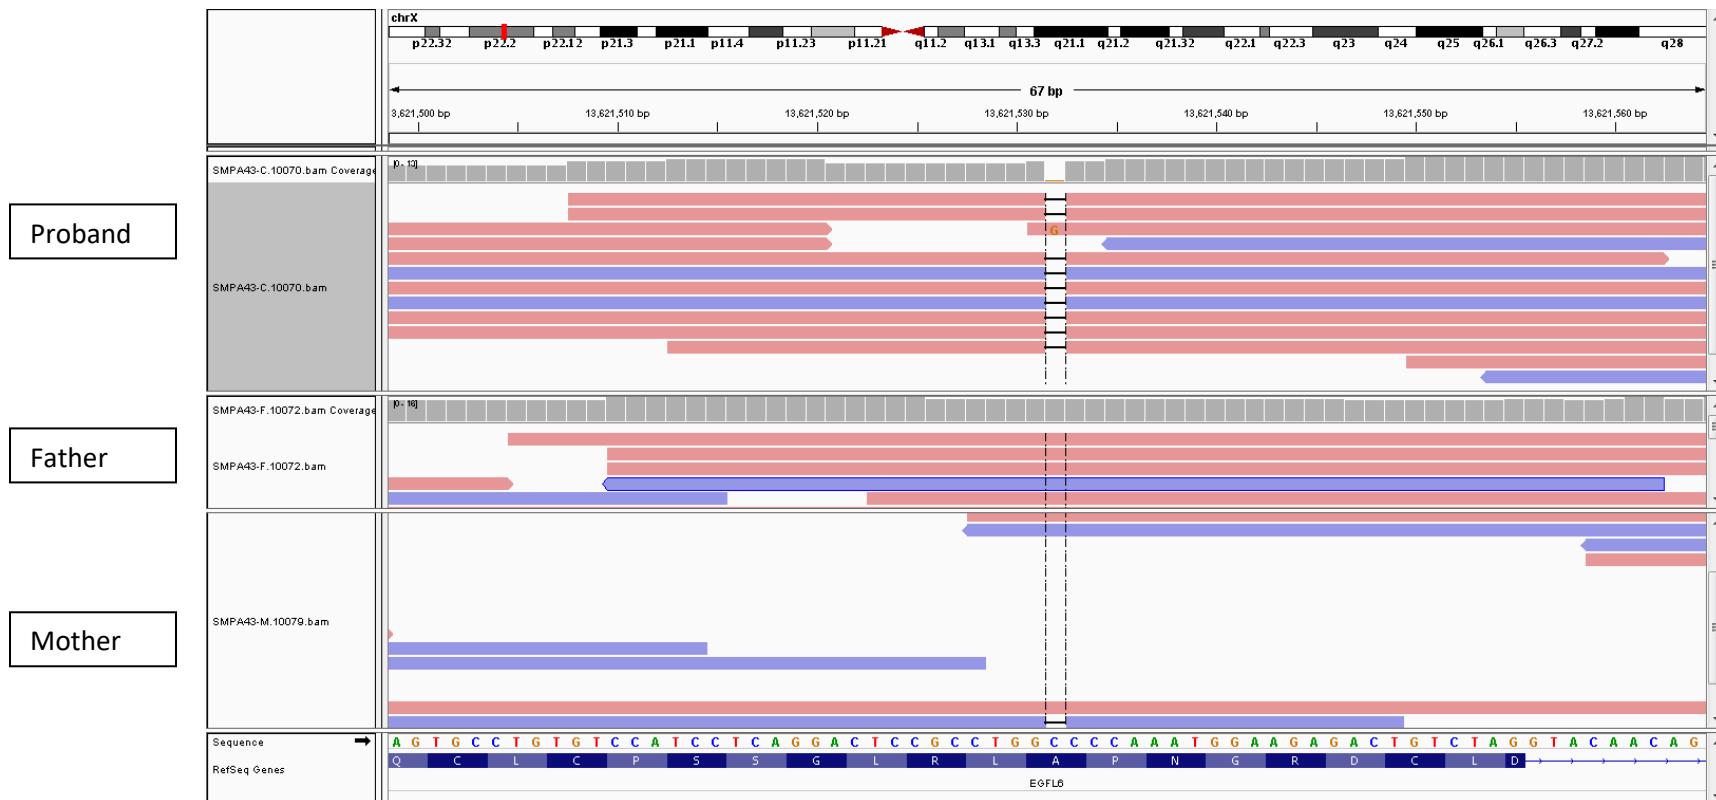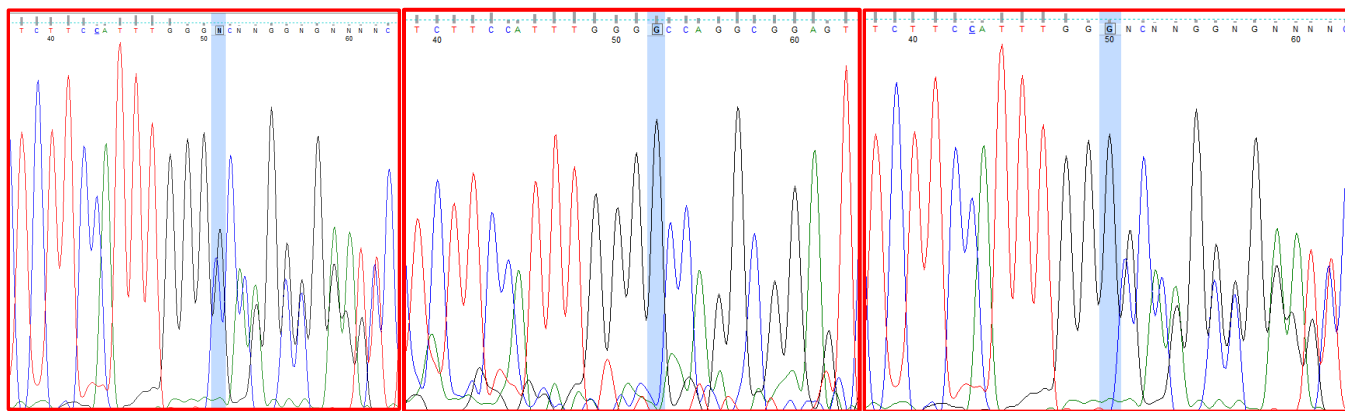

Proband

Father

Mother

## 2. SMPA27: PIR

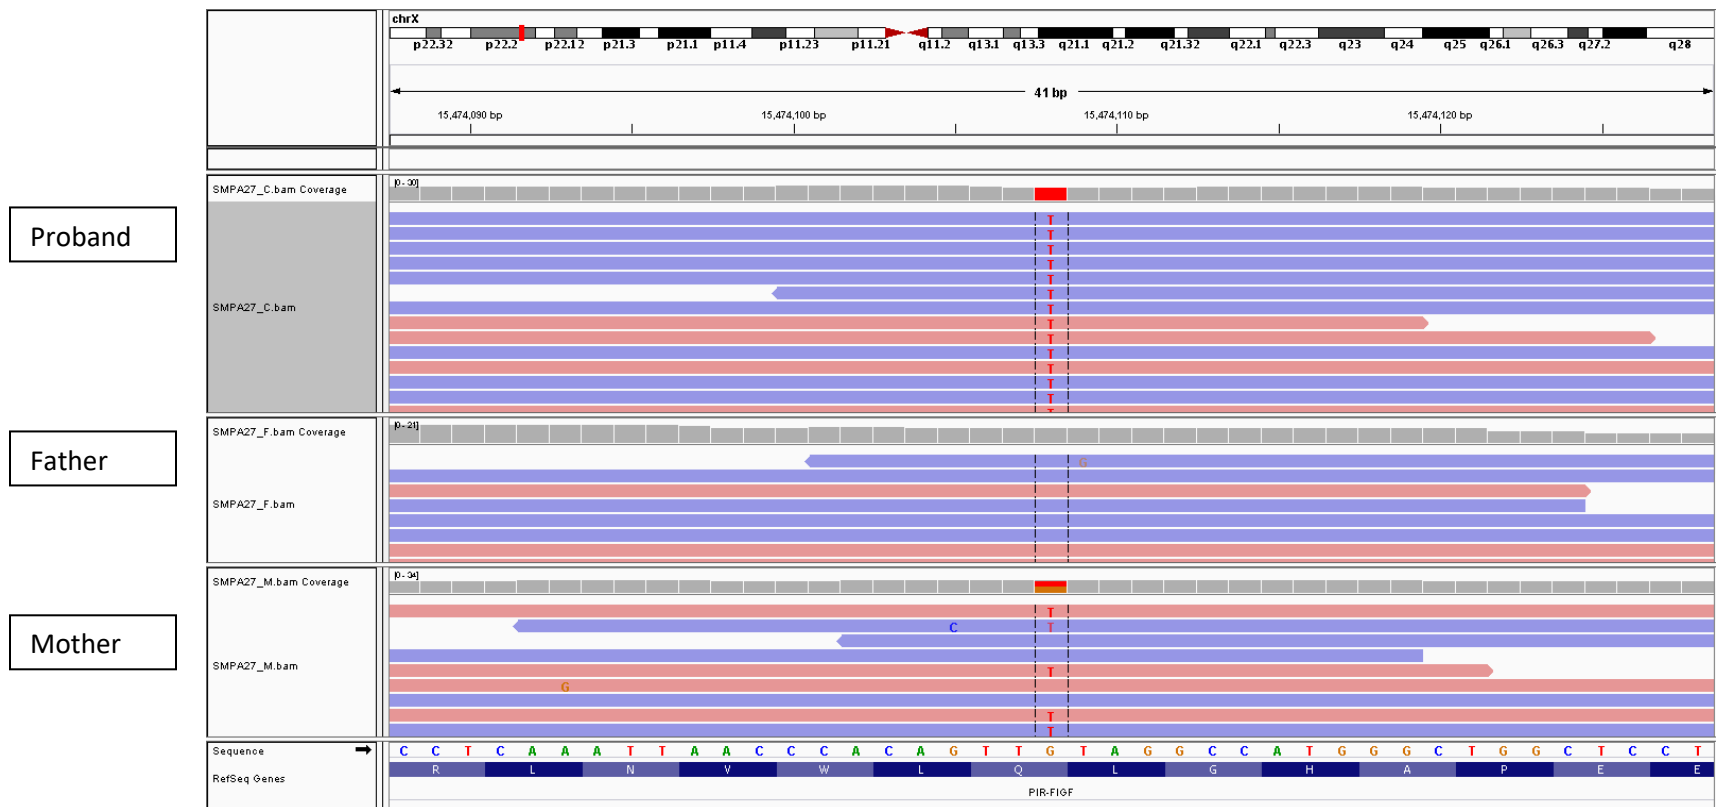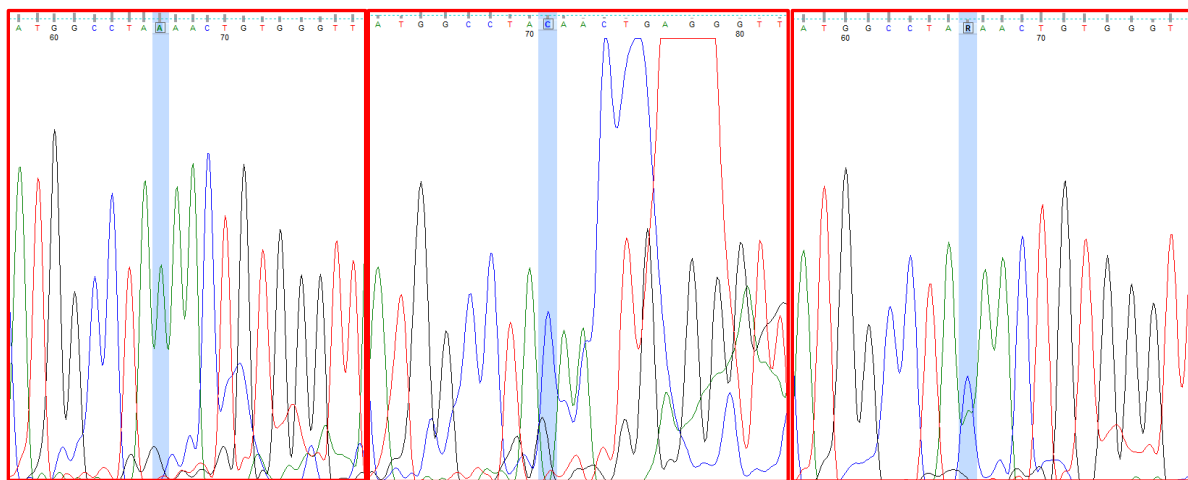

Proband

Father

Mother

### 3. SMPA3: MAGEB2

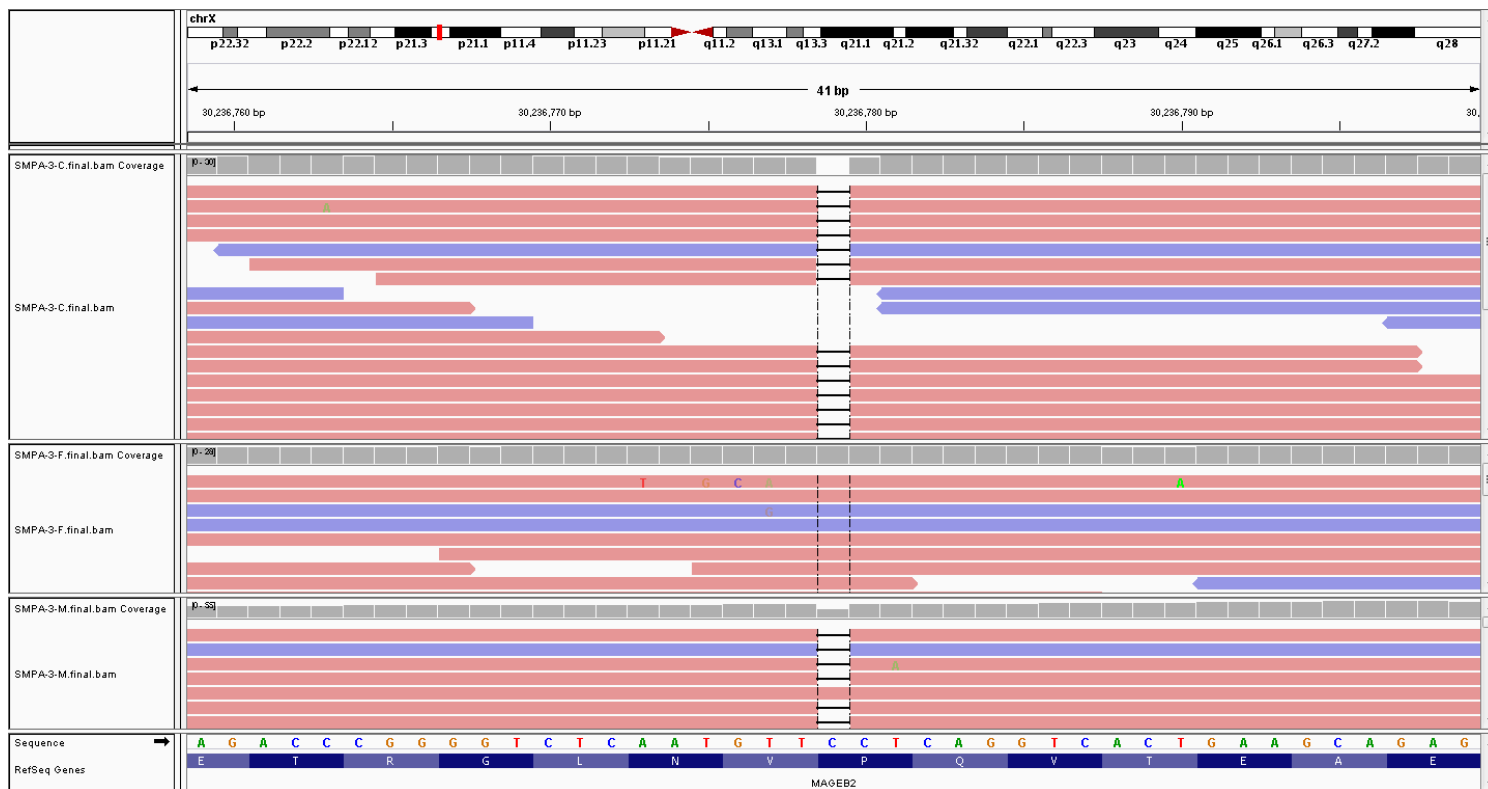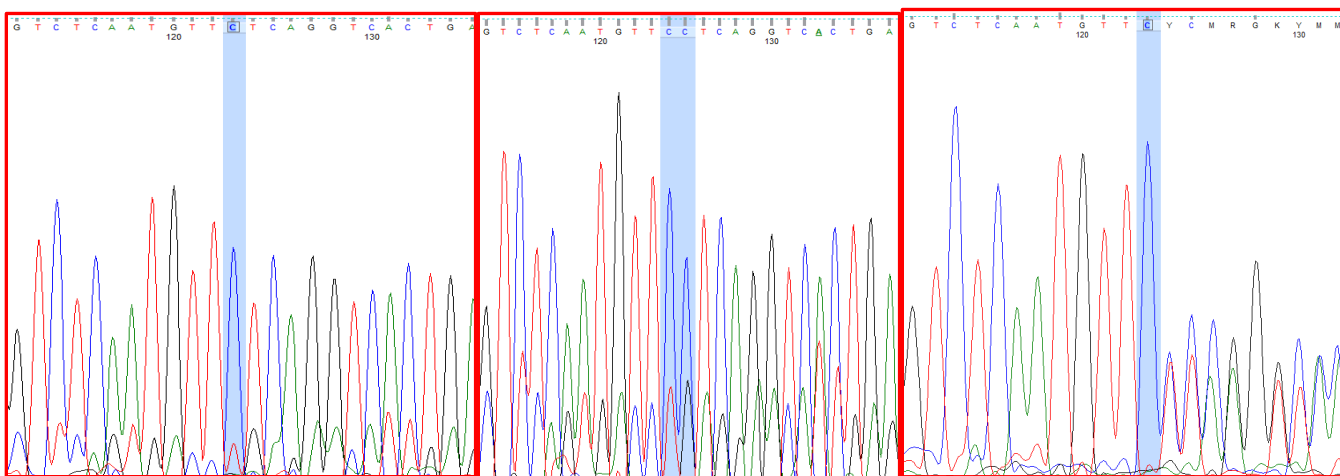

Proband

Father

Mother

4. IAU69: RRAGB

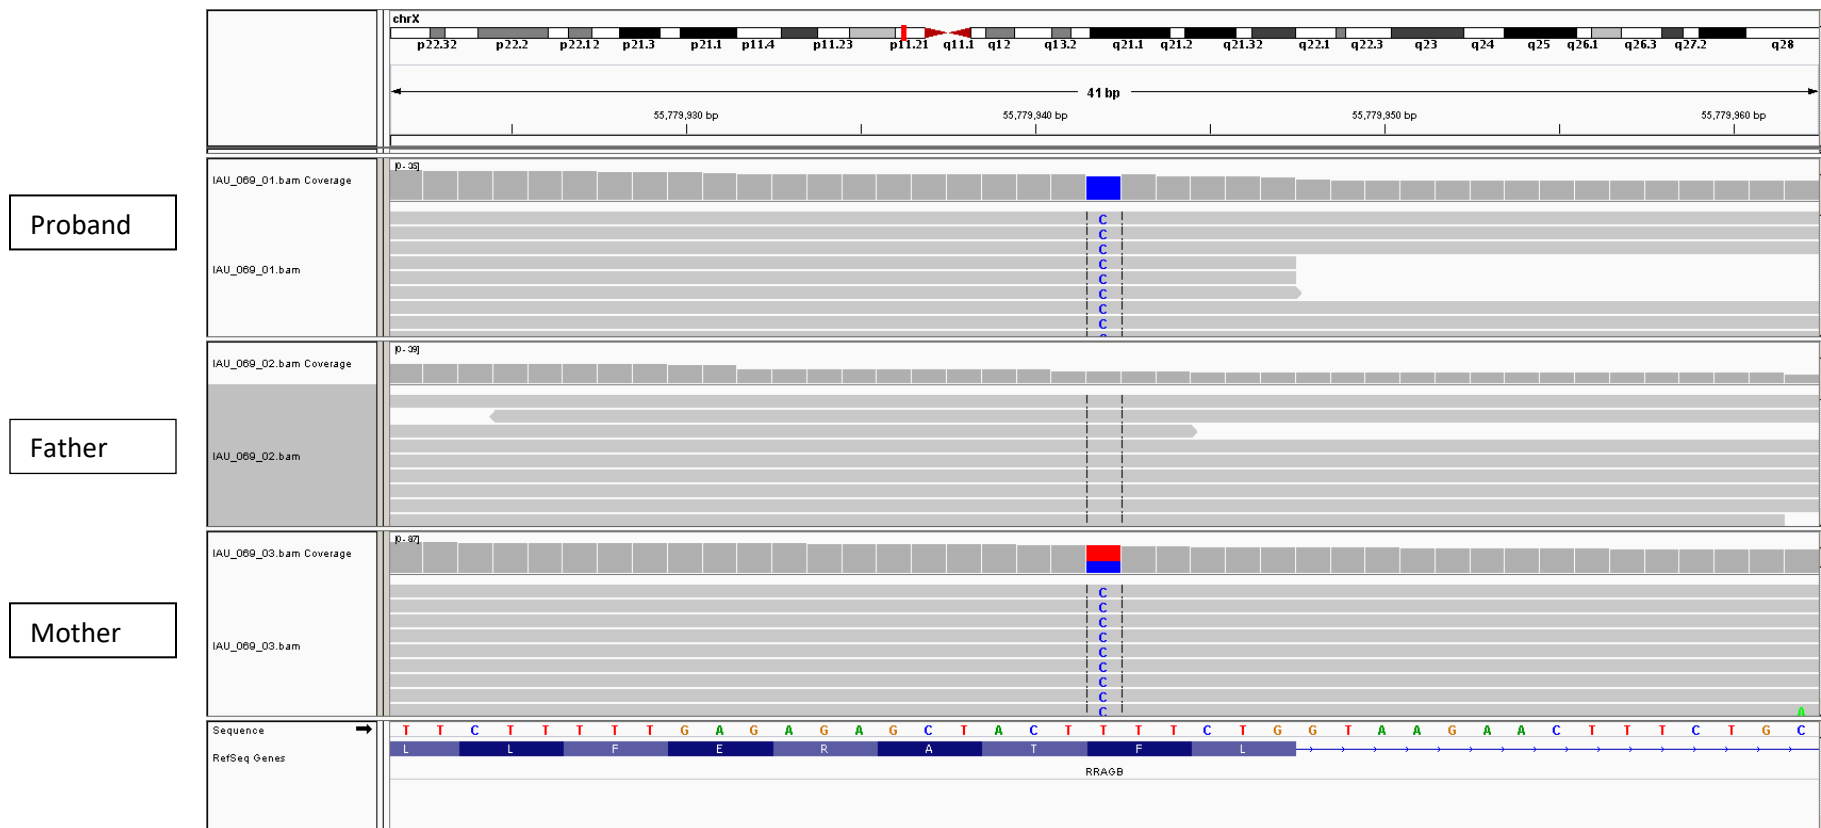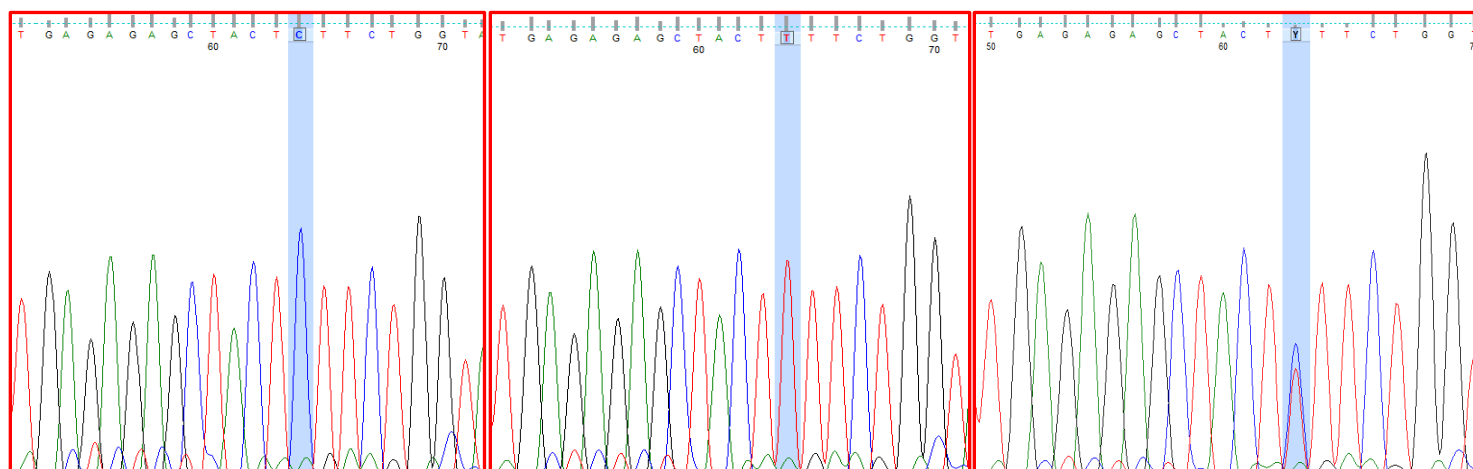

Proband

Father

Mother



5. IAU45: MSN

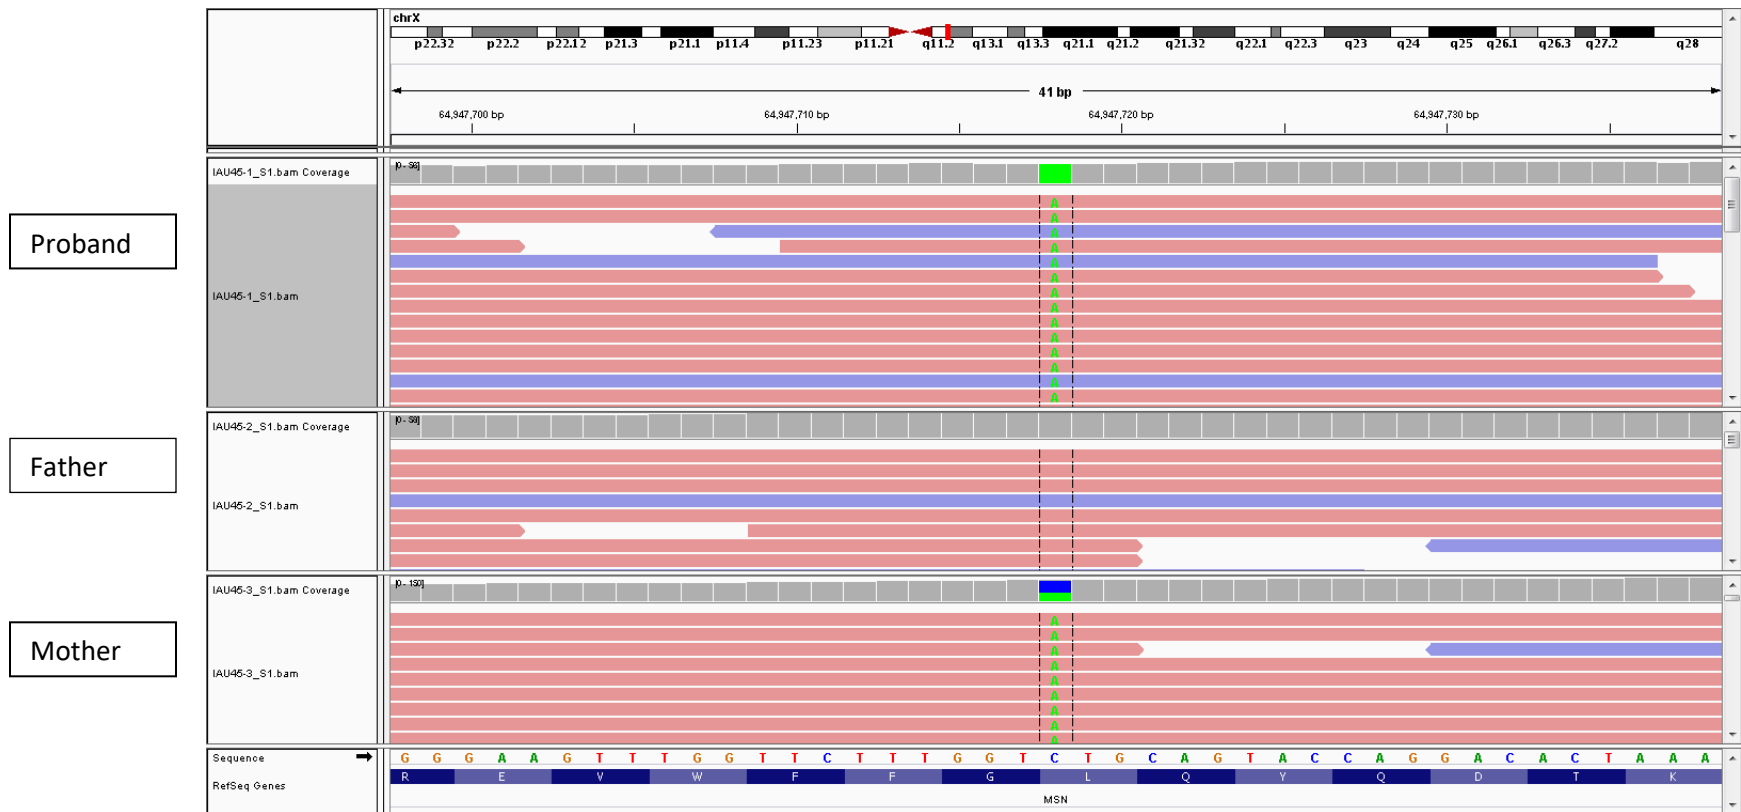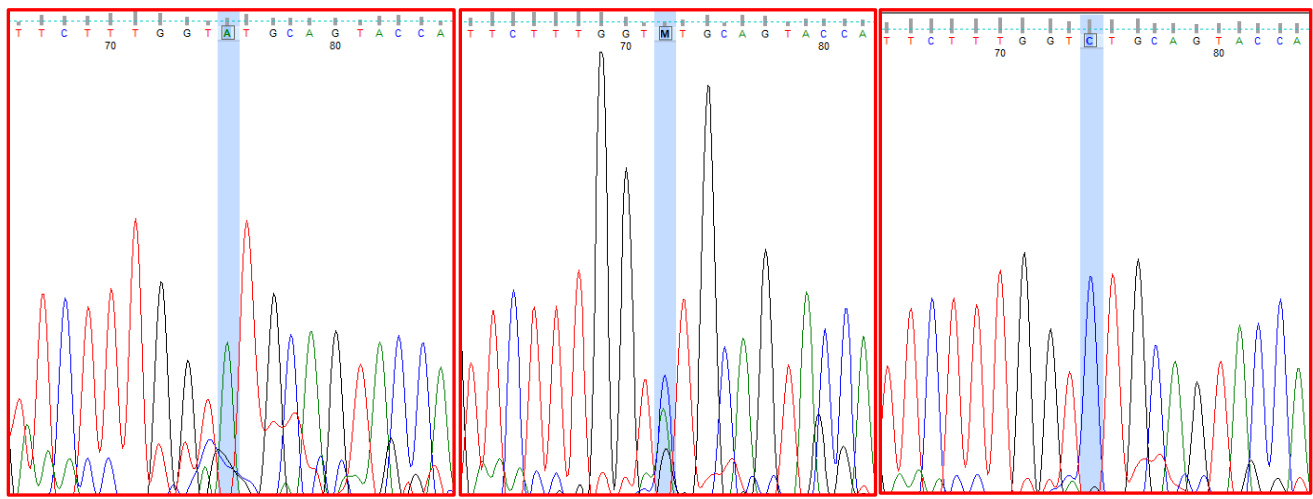

Proband

Father

Mother

## 6. SMPA15: NRK

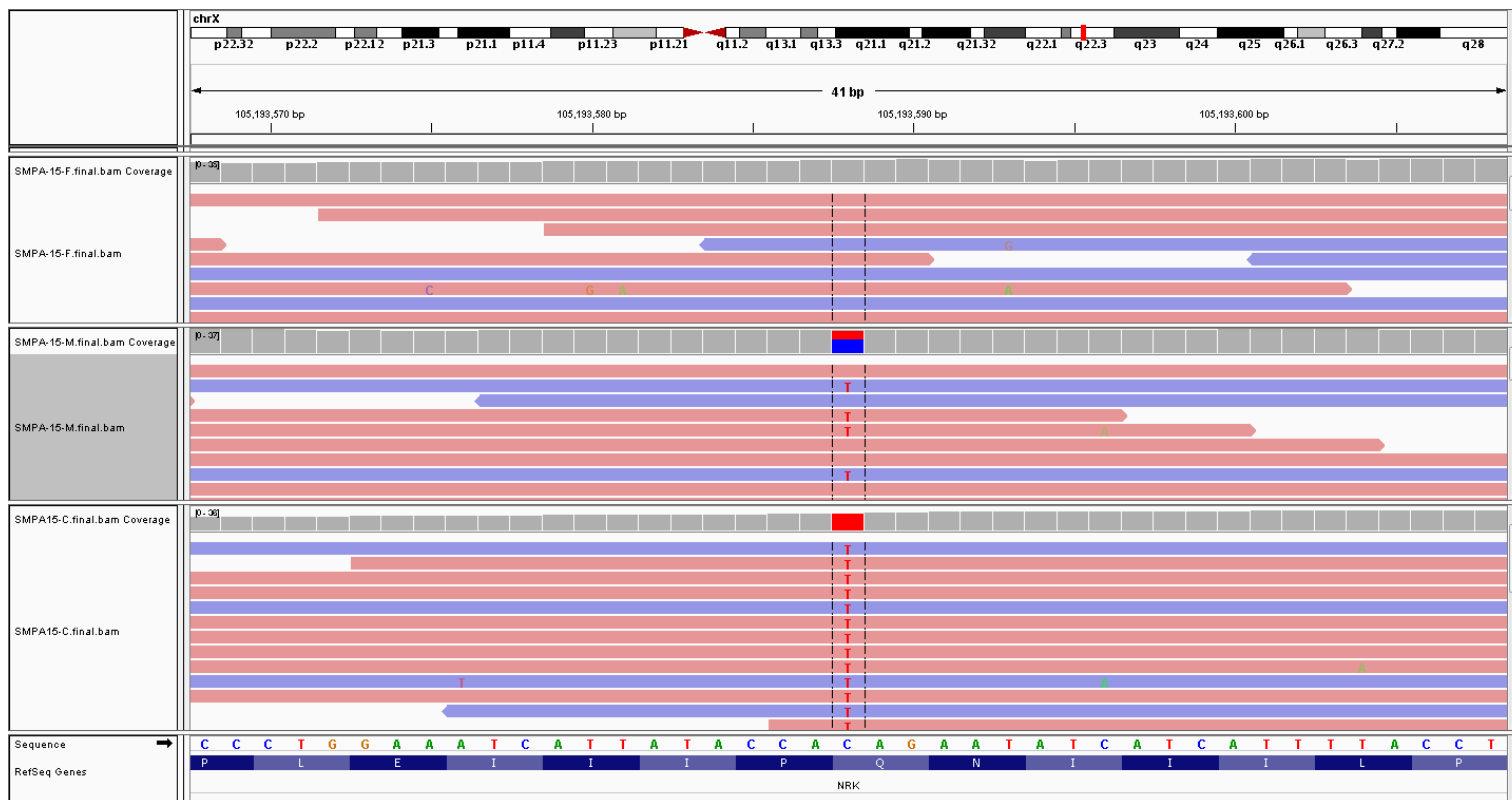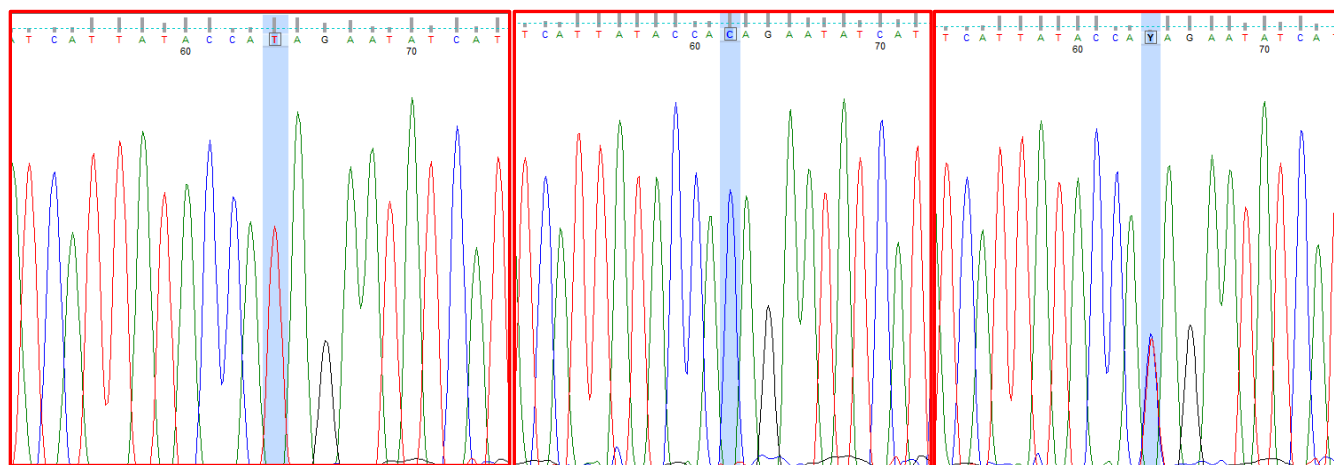

Proband

Father

Mother

7. IAU47: MID2

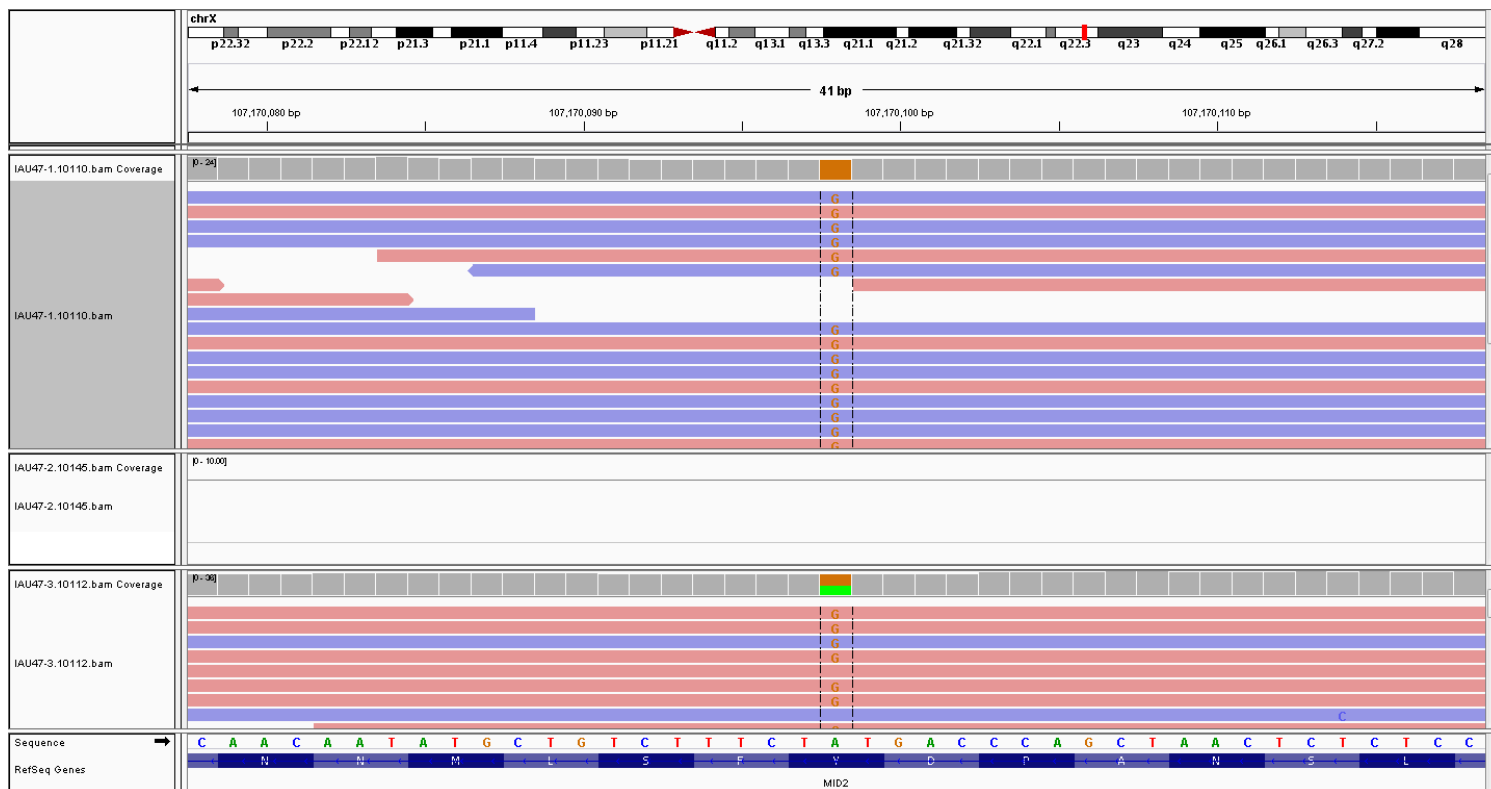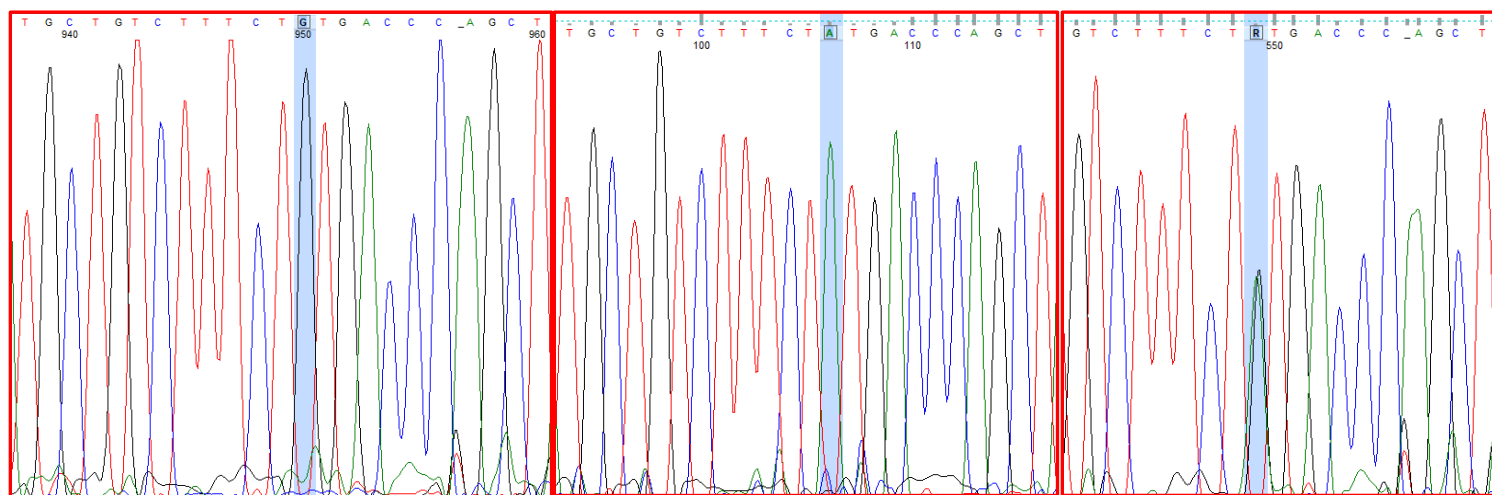

Proband

Father

Mother

8. SMPA15: *GUCY2F*

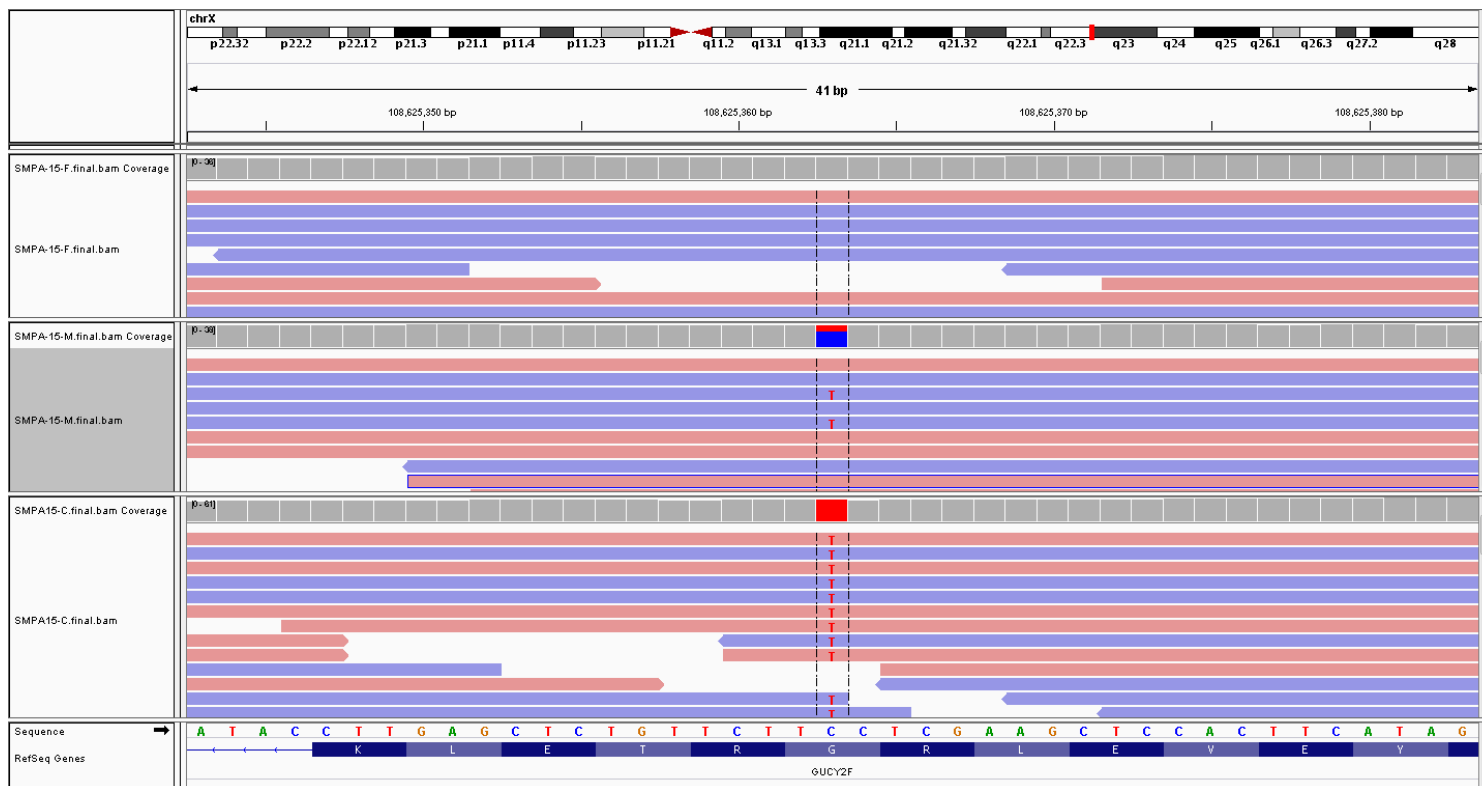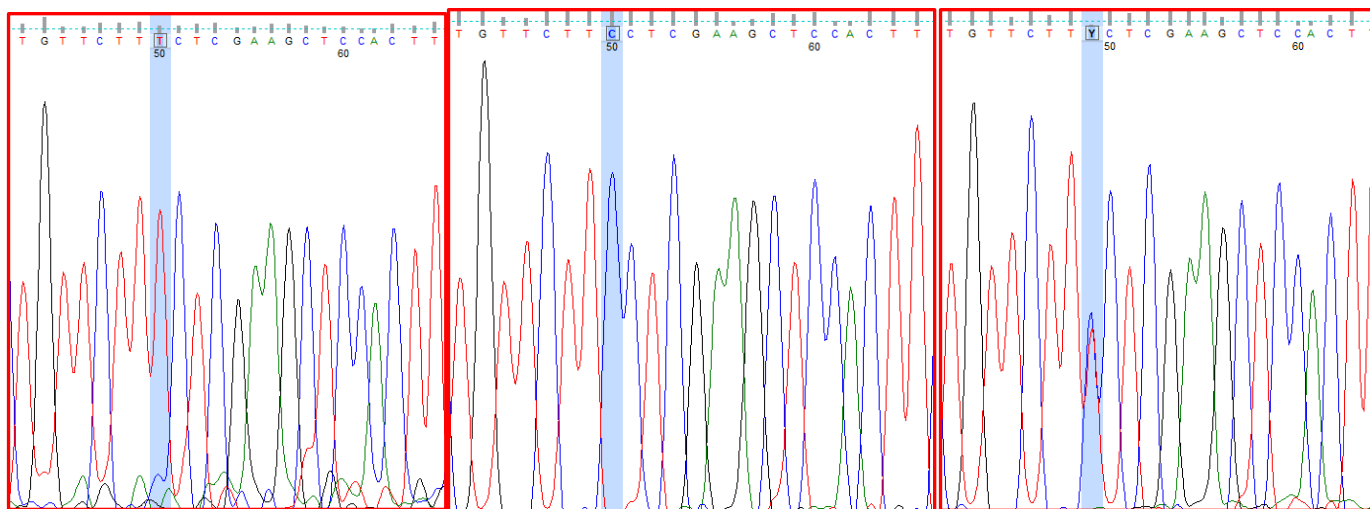

Proband

Father

Mother

9. Autism6: *TRPC5*

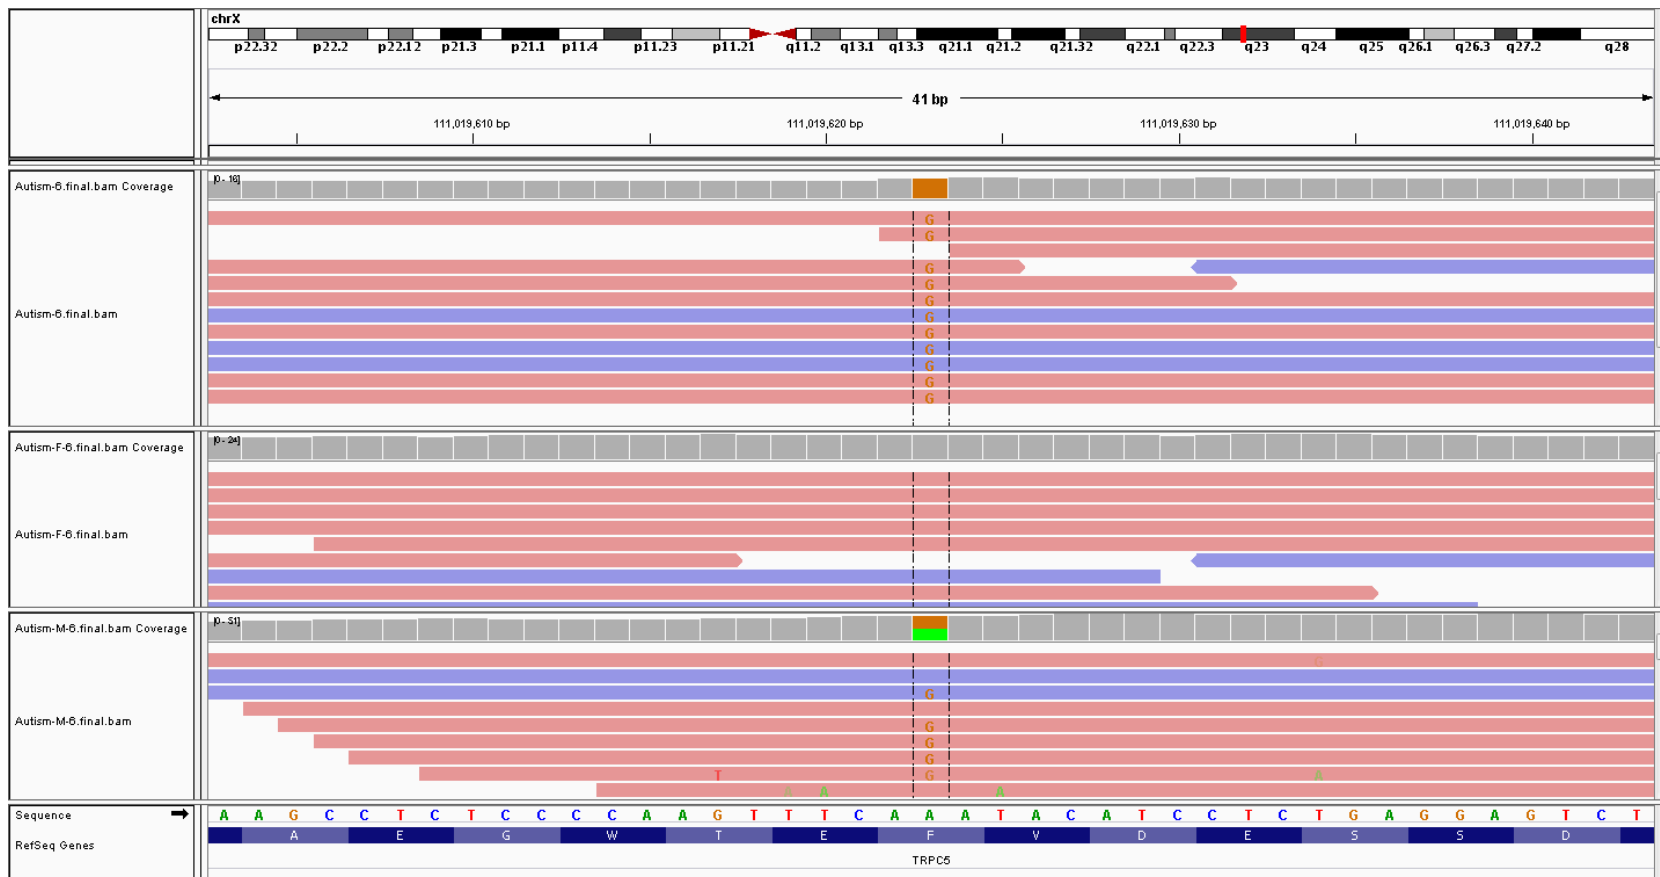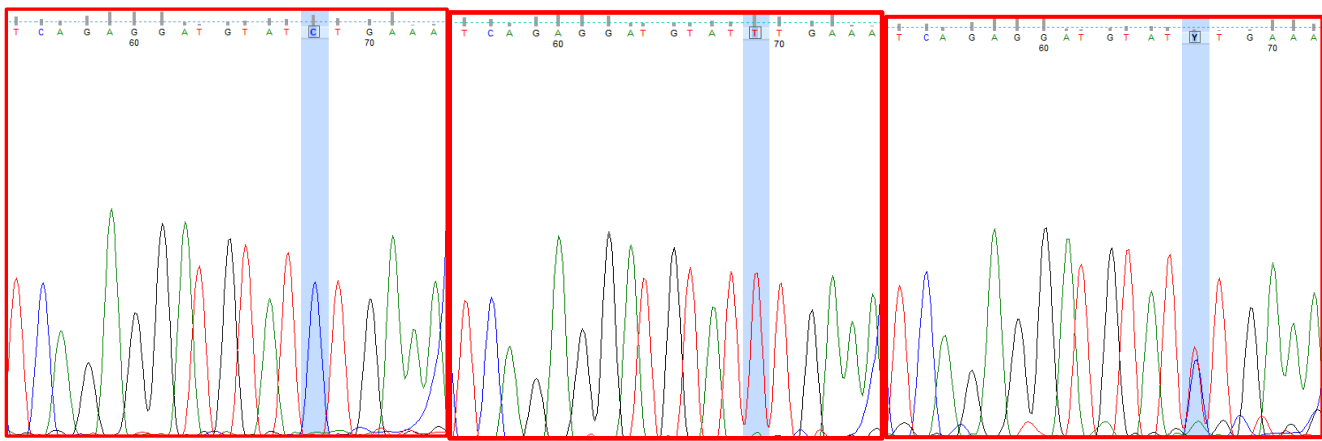

Proband

Father

Mother

10. IAU78: ACTRT1

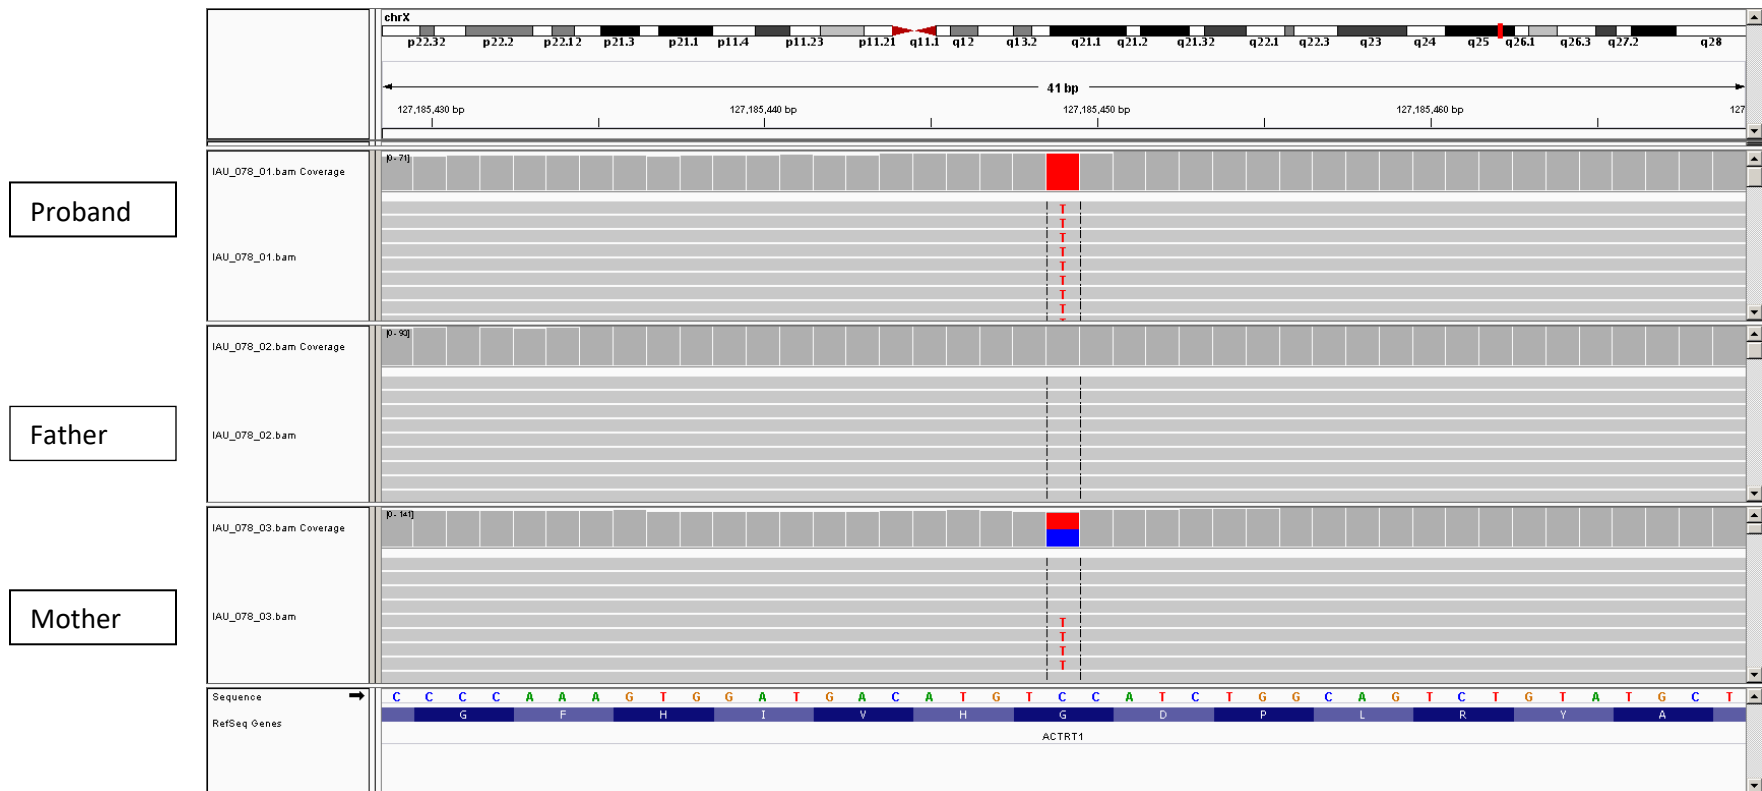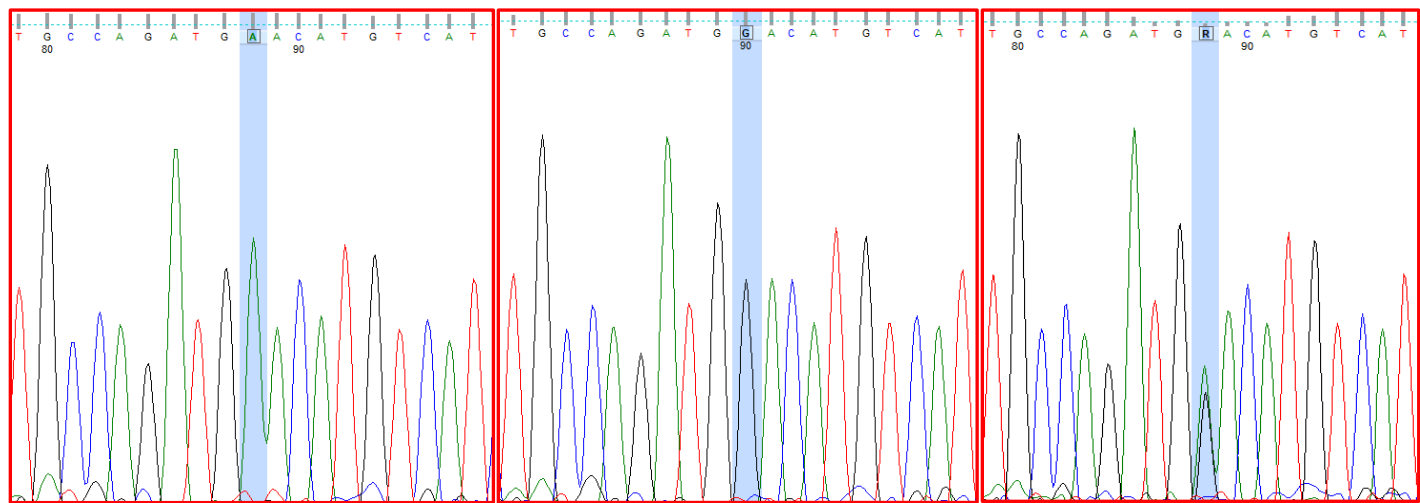

Proband

Father

Mother

11. IAU24: AIFM1

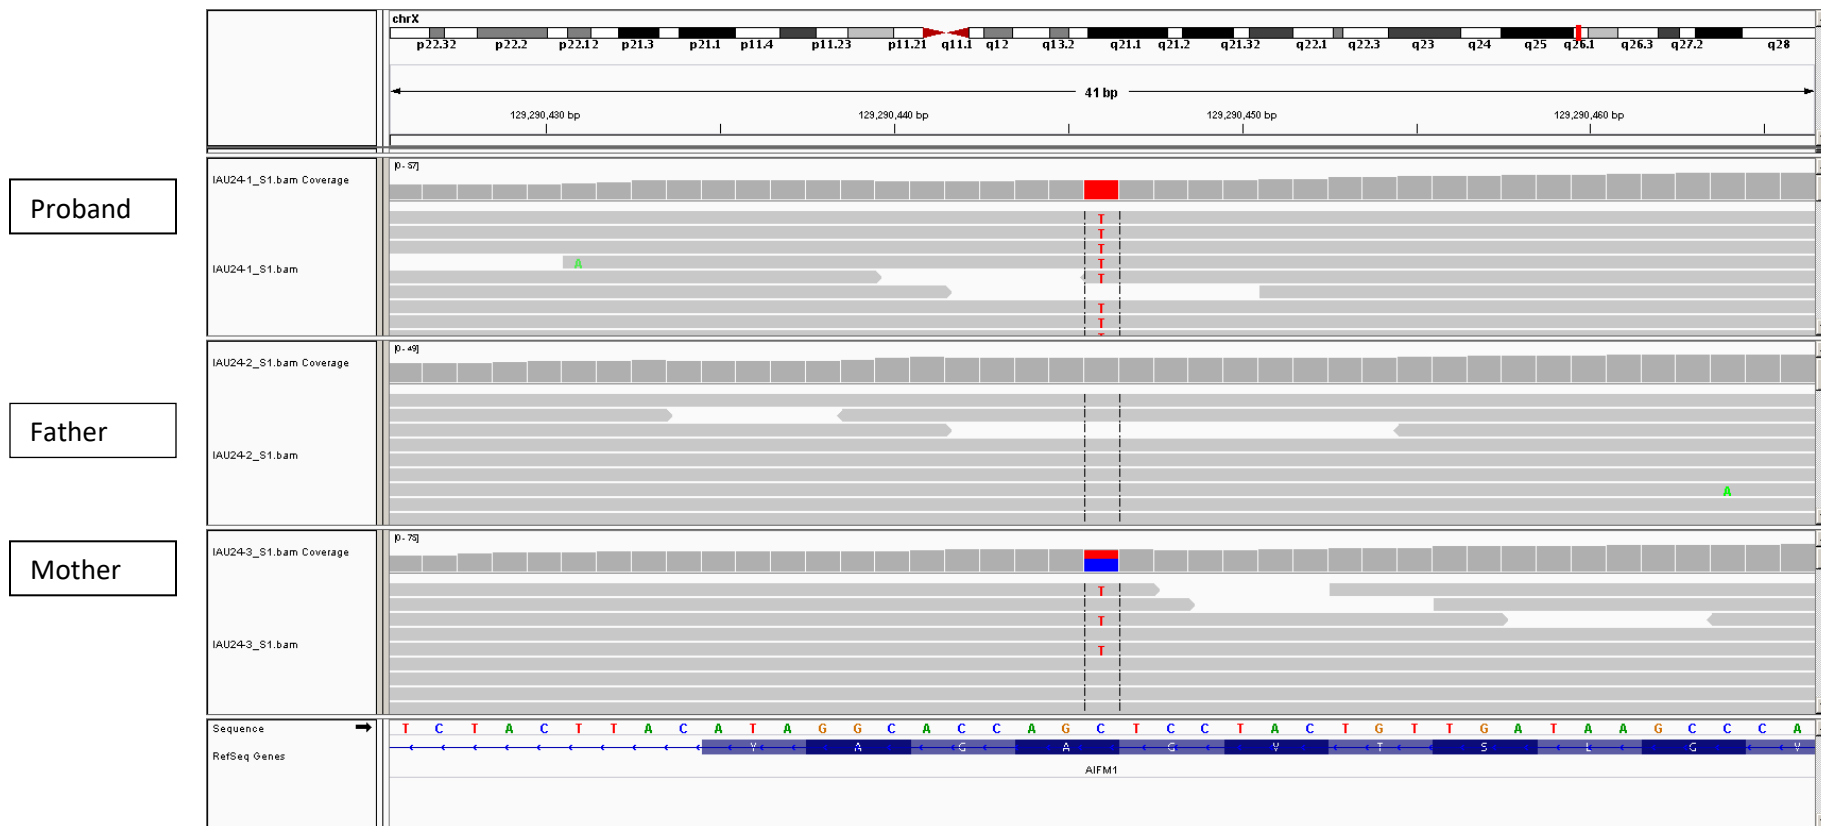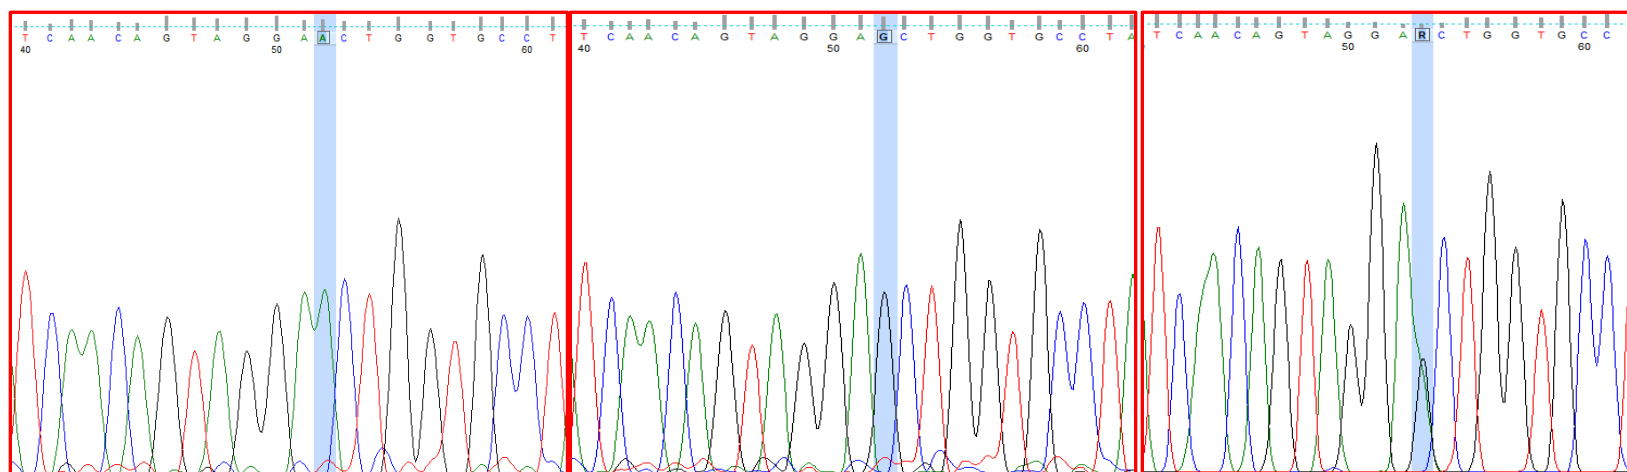

Proband

Father

Mother

12. SMPA35: SAGE1

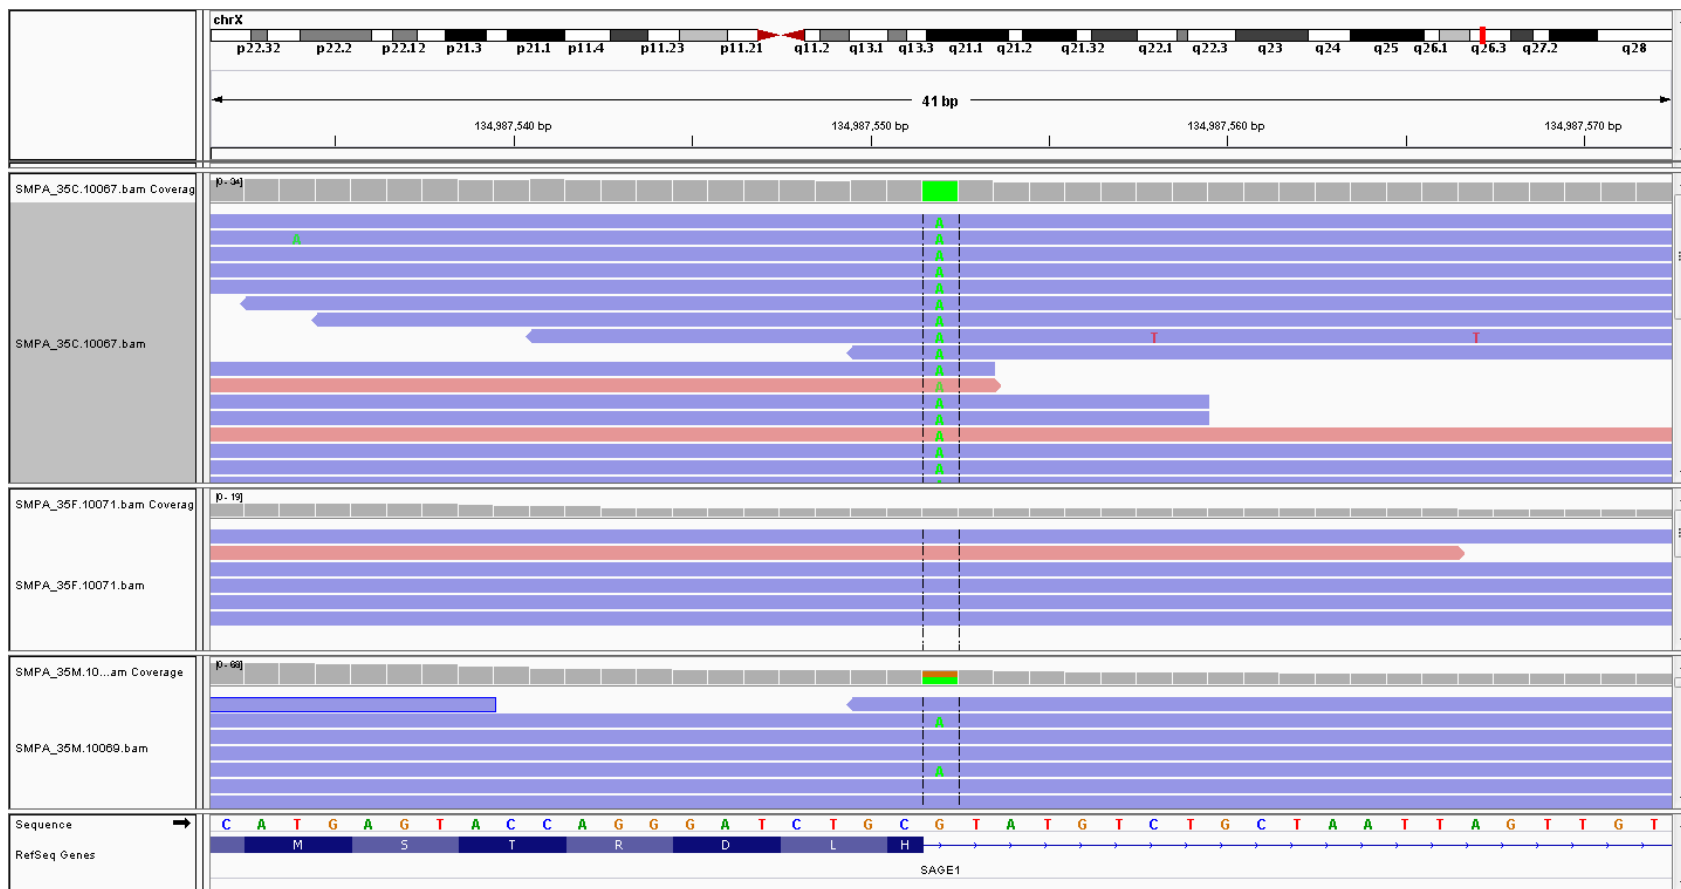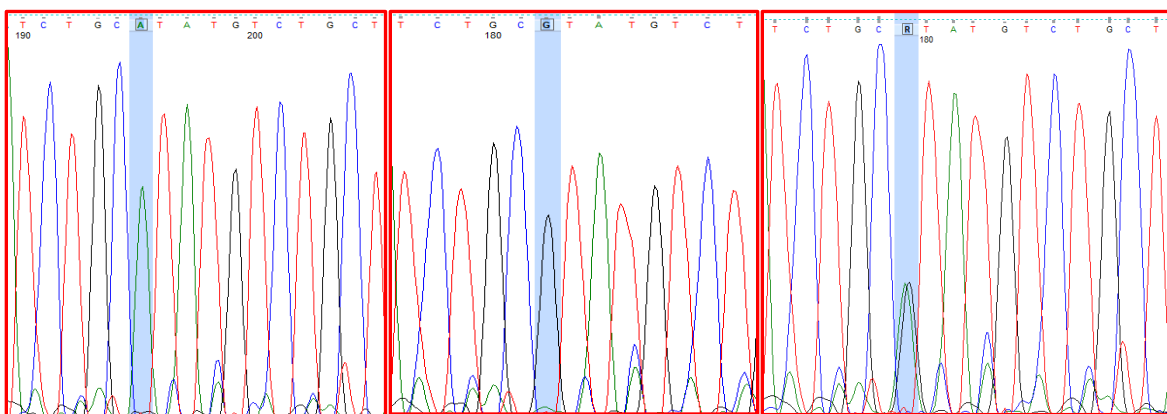

Proband

Father

Mother



13. IAU51: *MAGEC1*

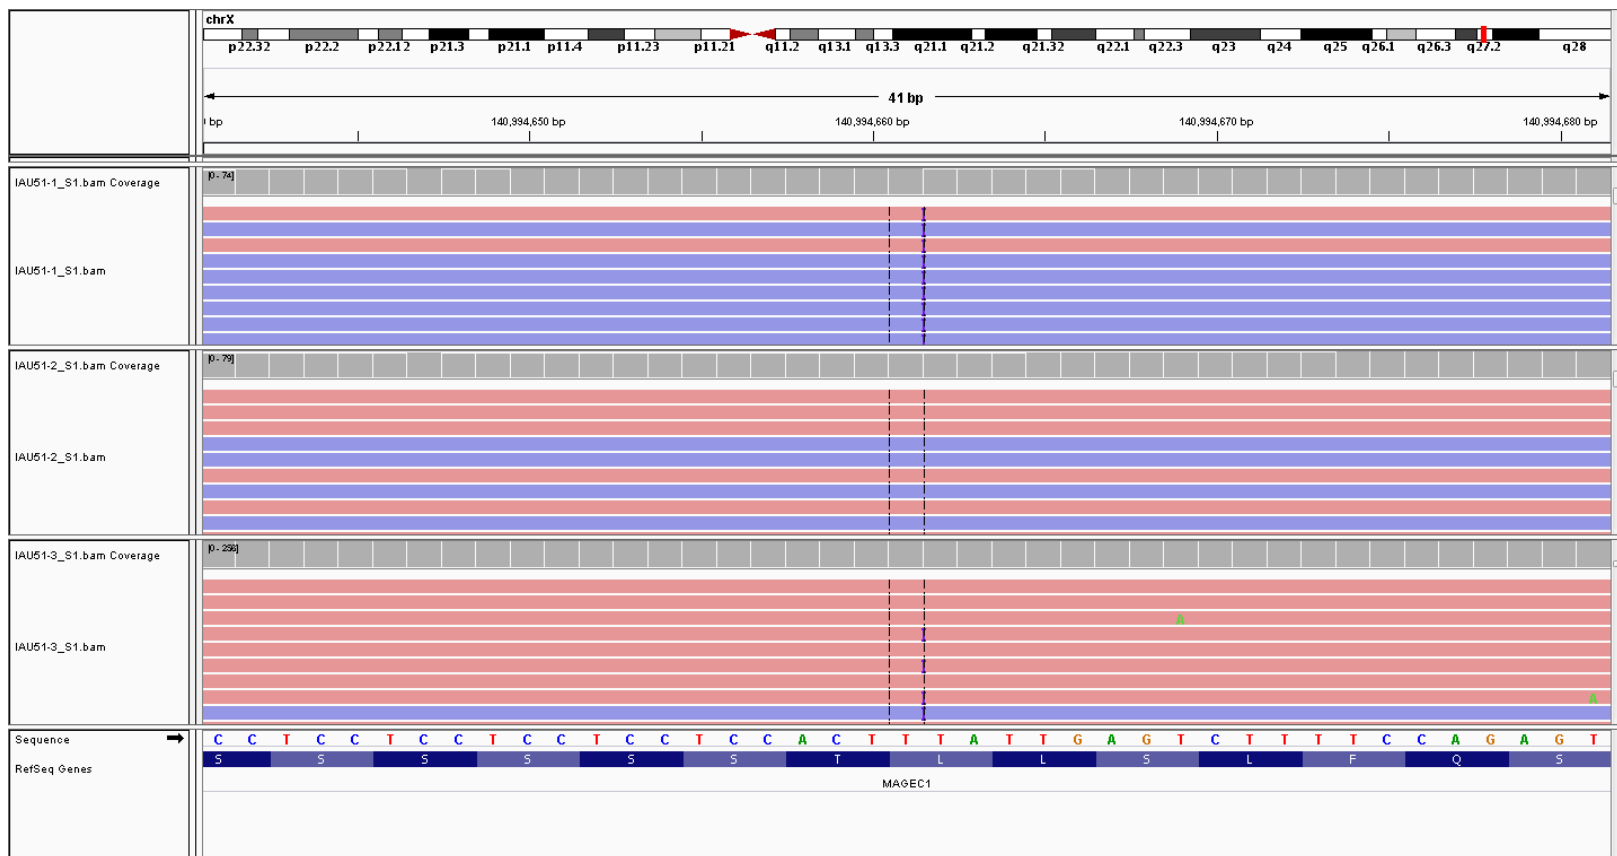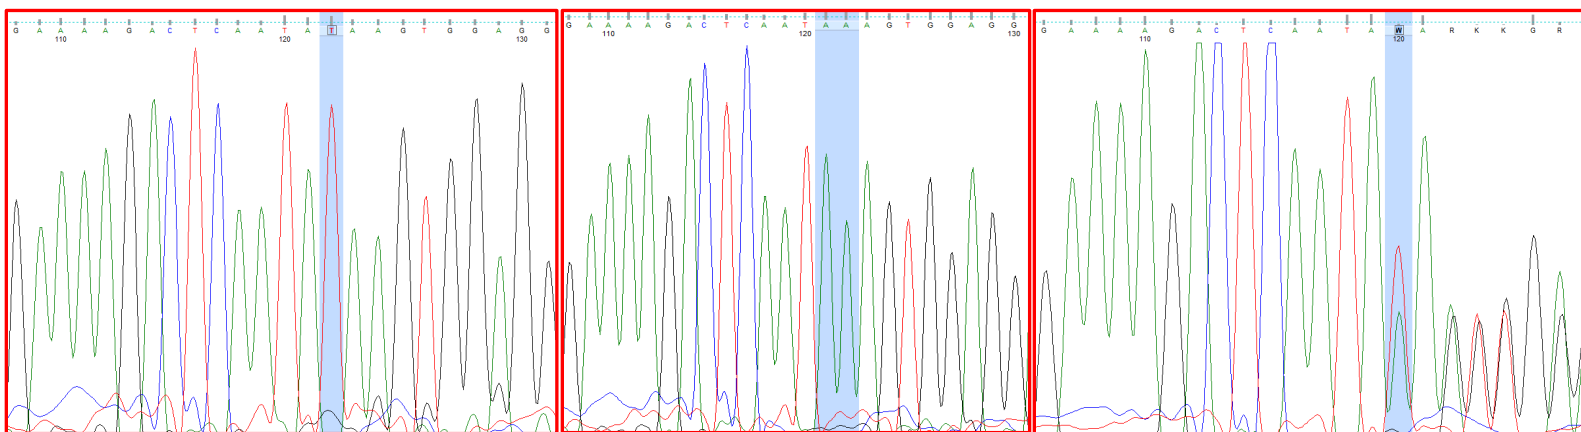

Proband

Father

Mother

14. SMPA70: CNGA2

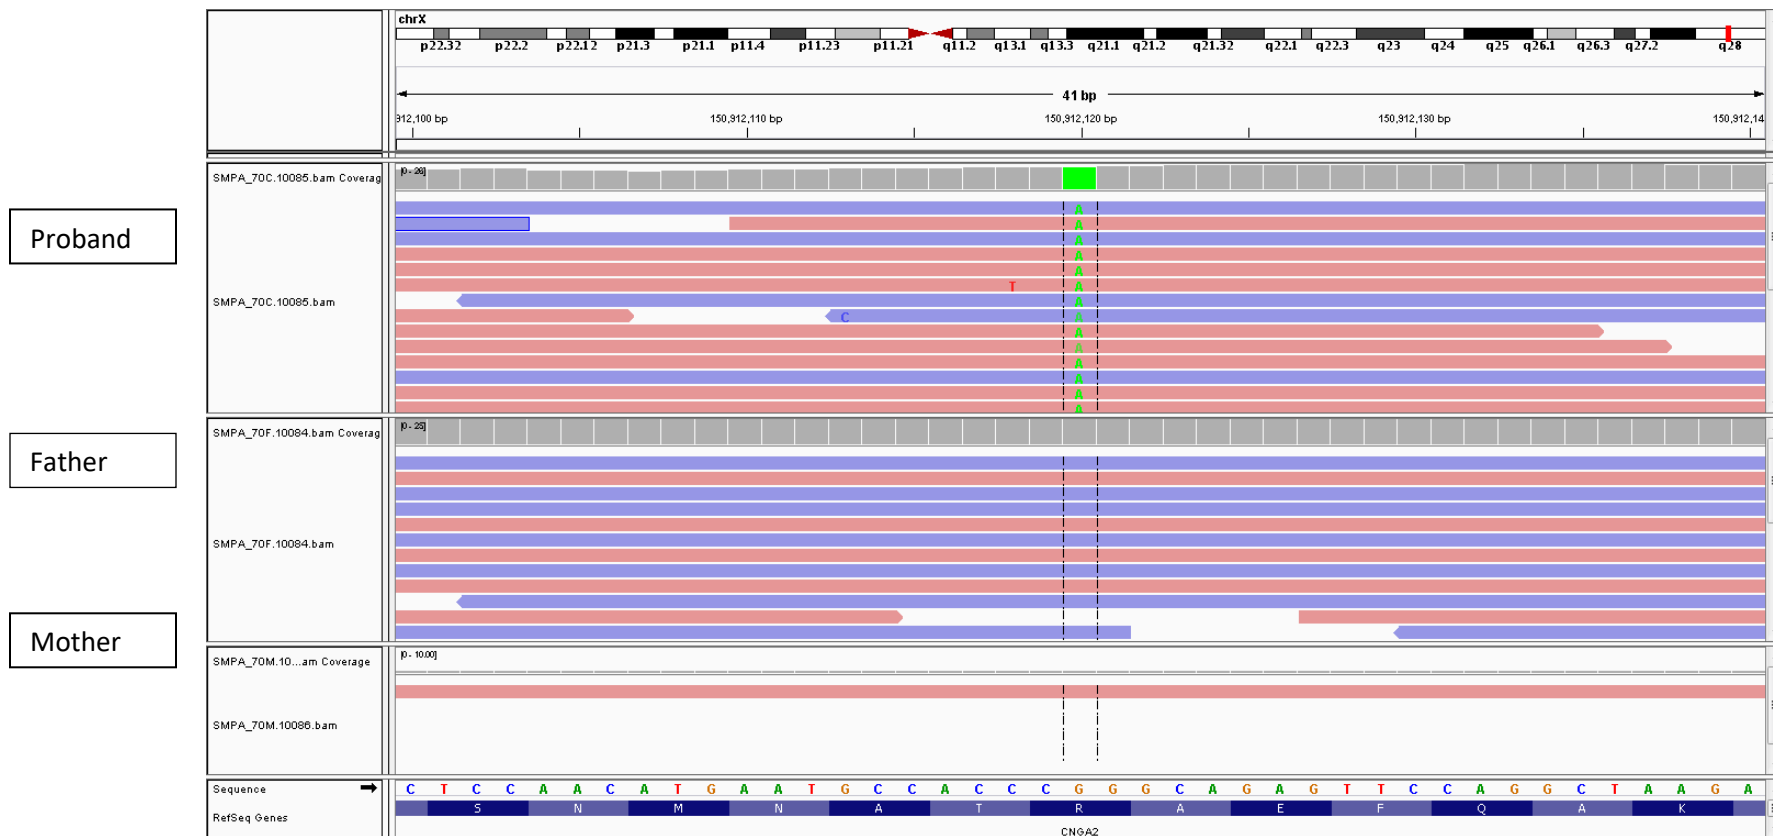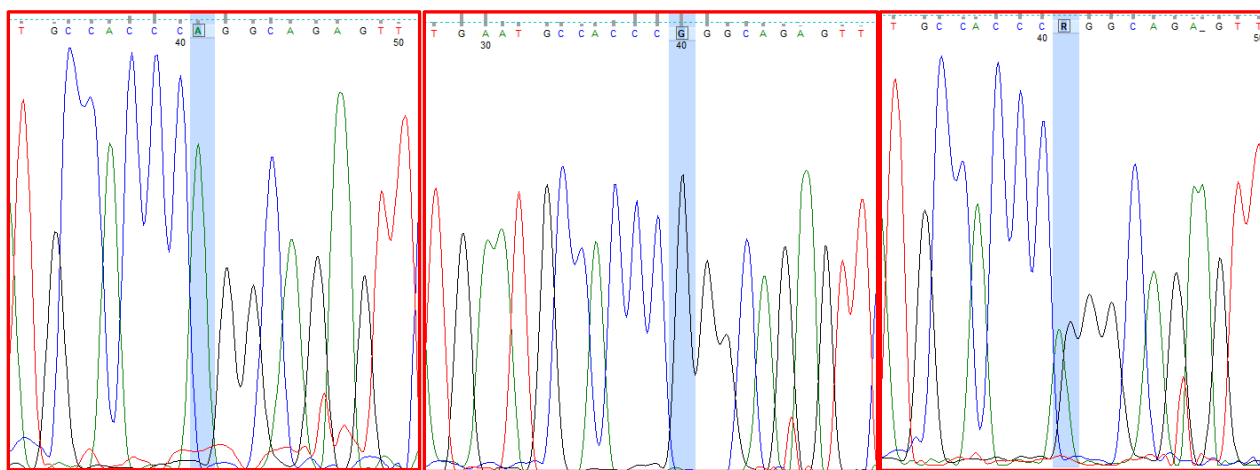

Proband

Father

Mother

15. IABB8: ZNF185

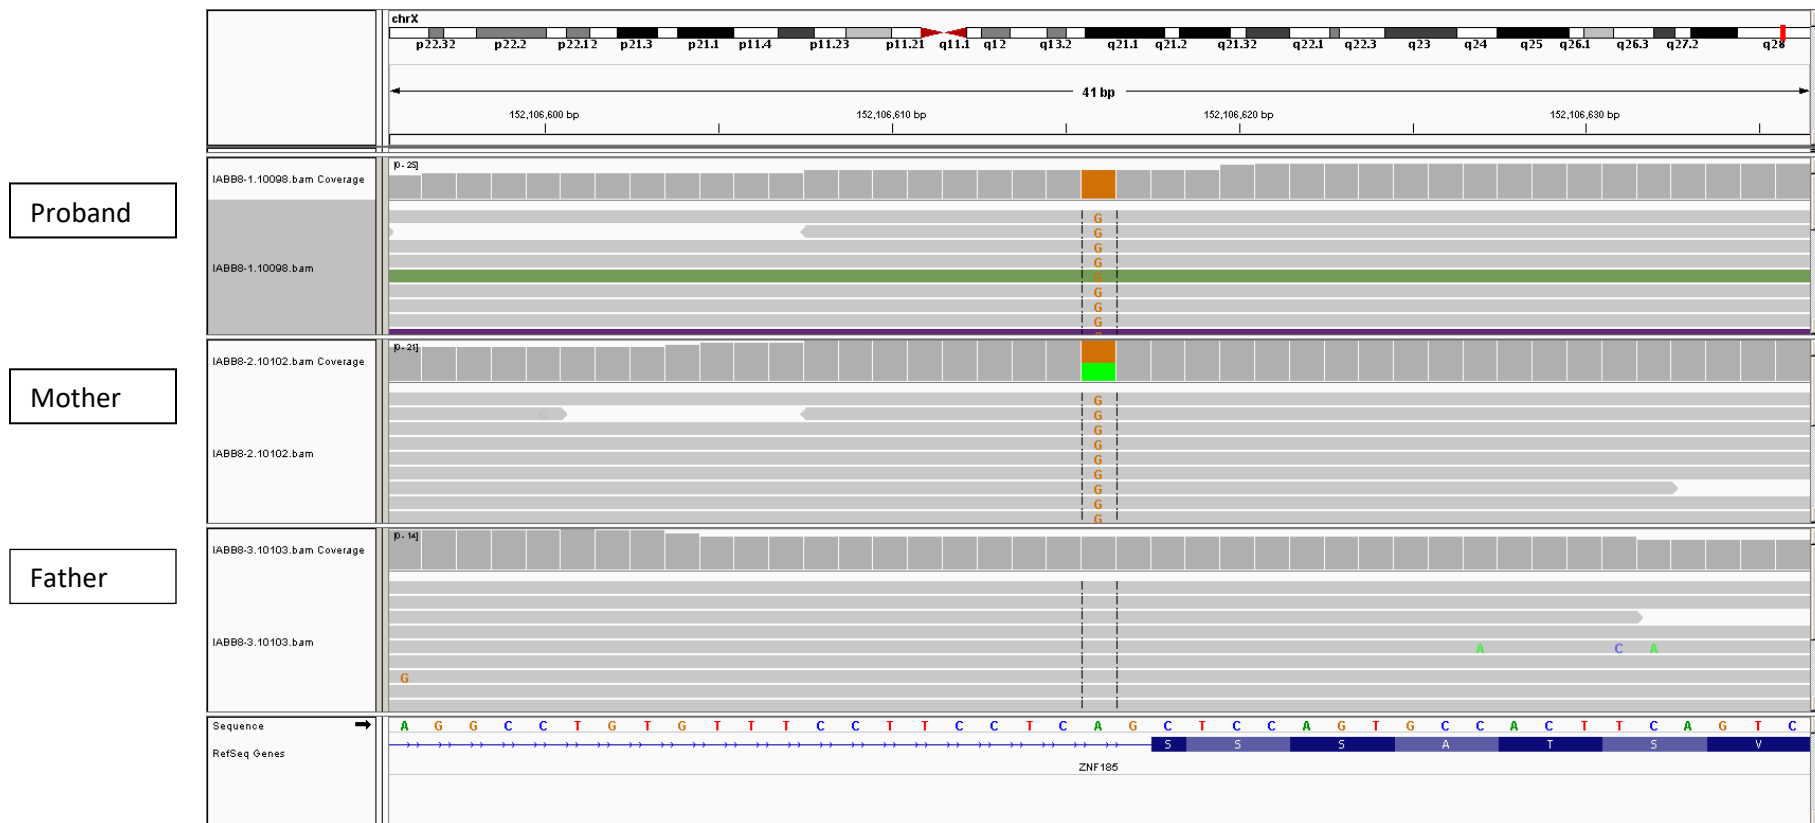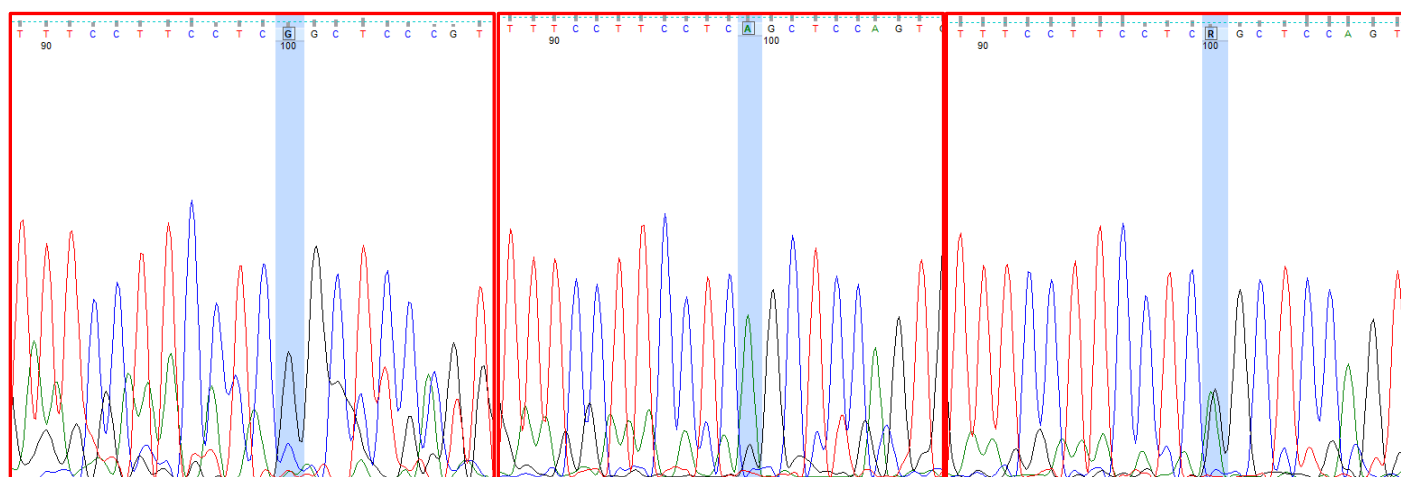

Proband

Father

Mother

16. SMPA41: *PLXNA3*

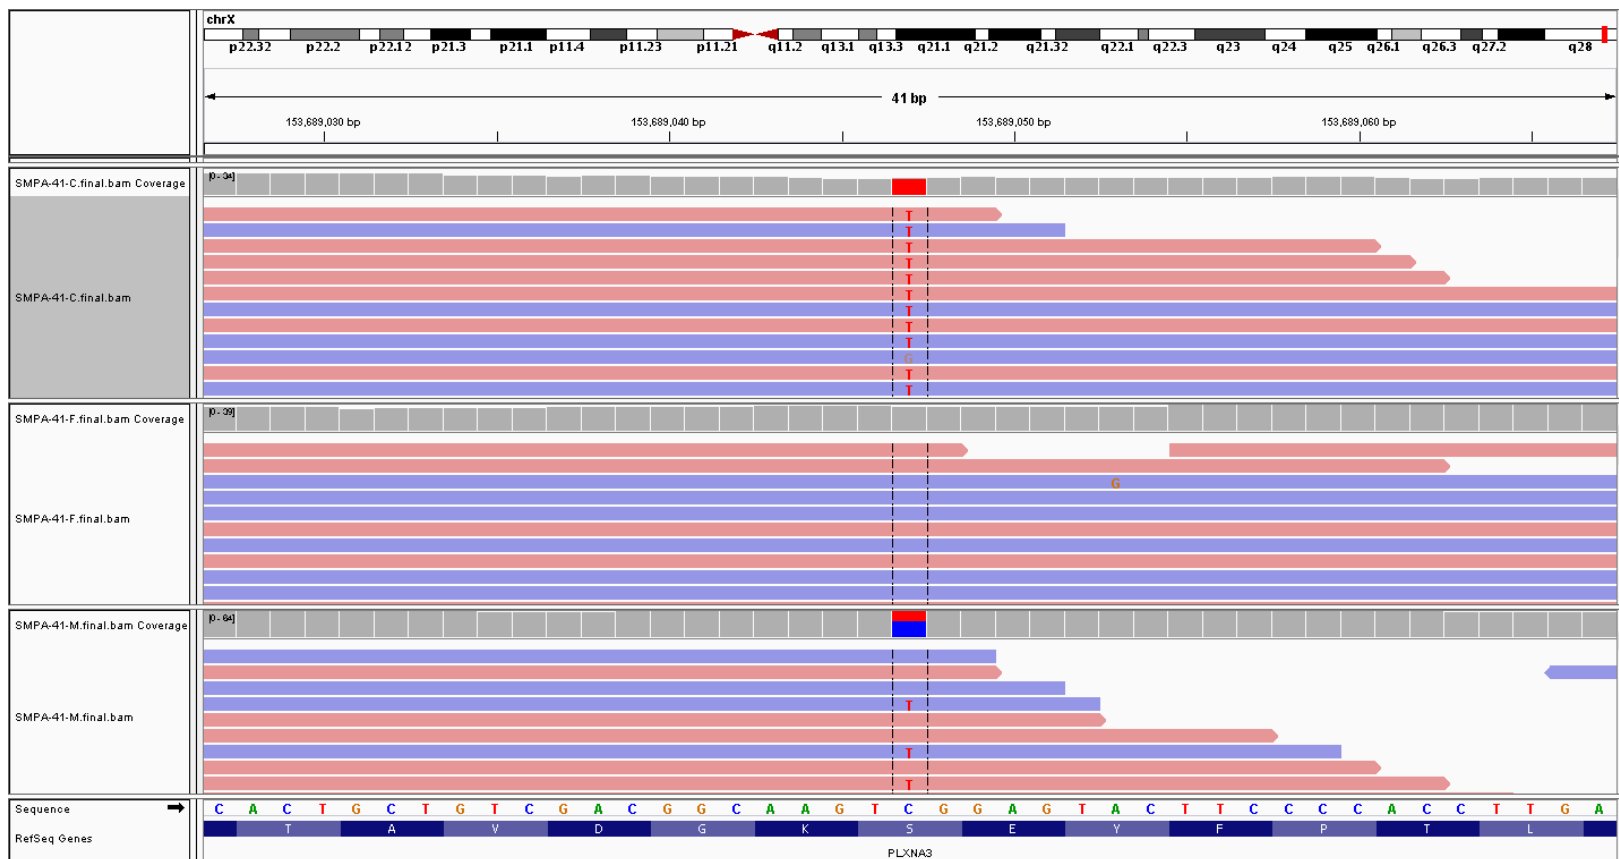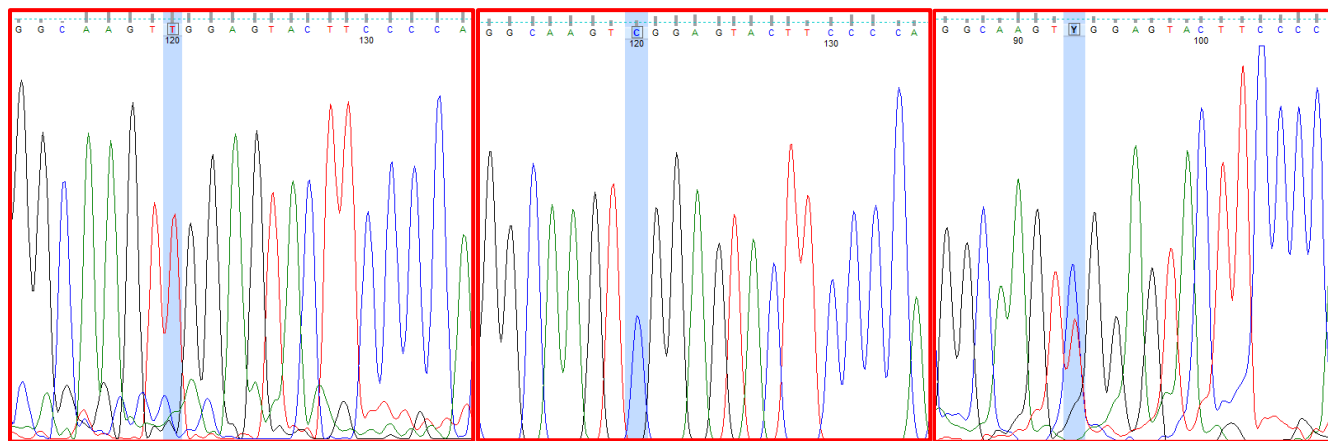

Proband

Father

Mother

17. SA1: CLTRN (TMEM27)- de novo

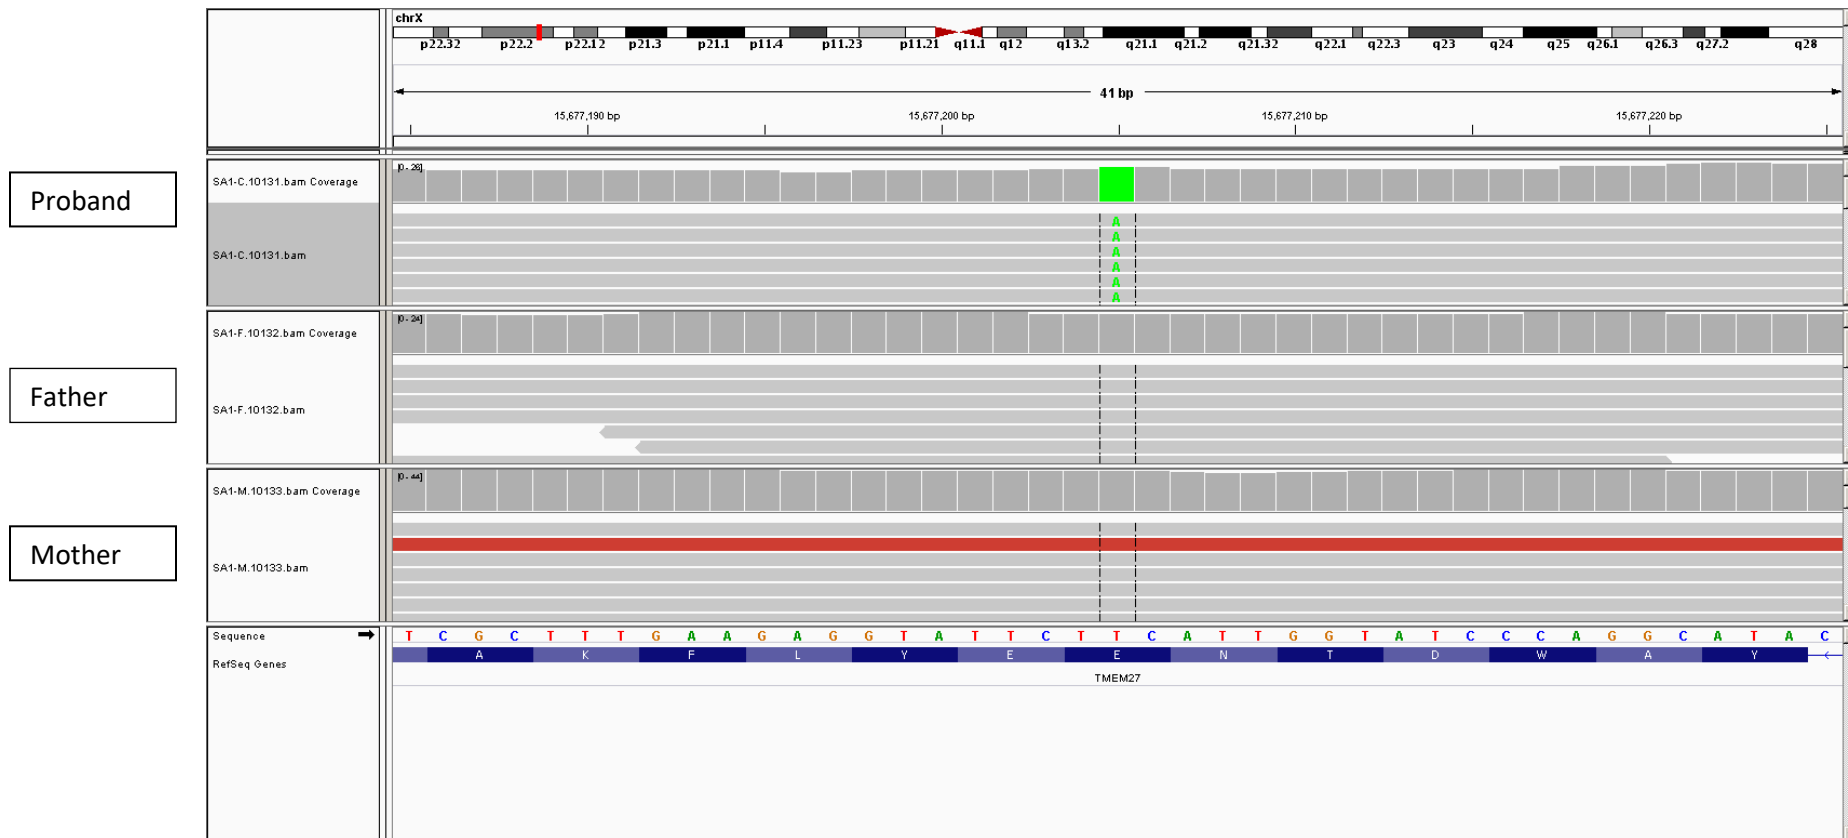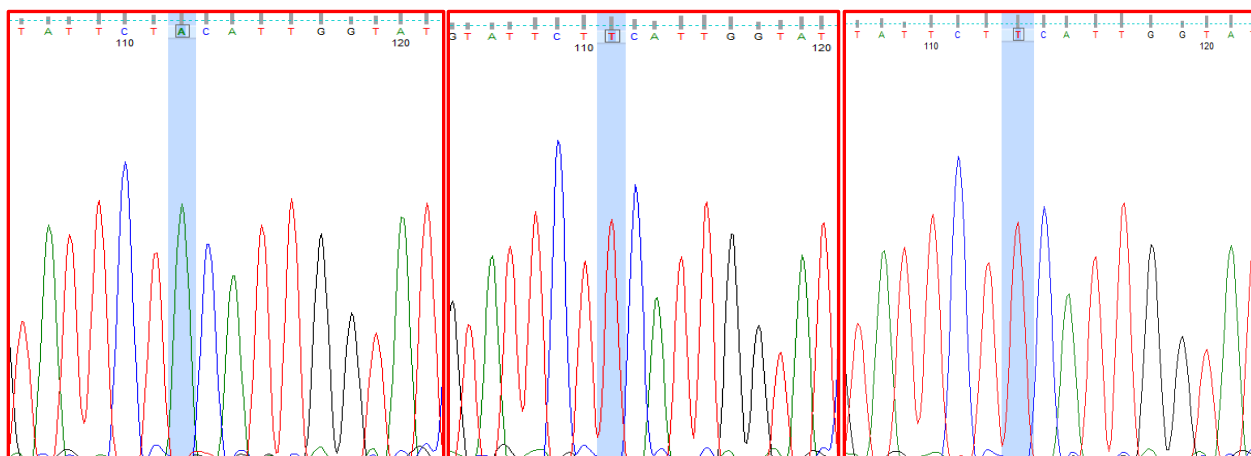

Proband

Father

Mother

18. SMPA84: *DRP2*

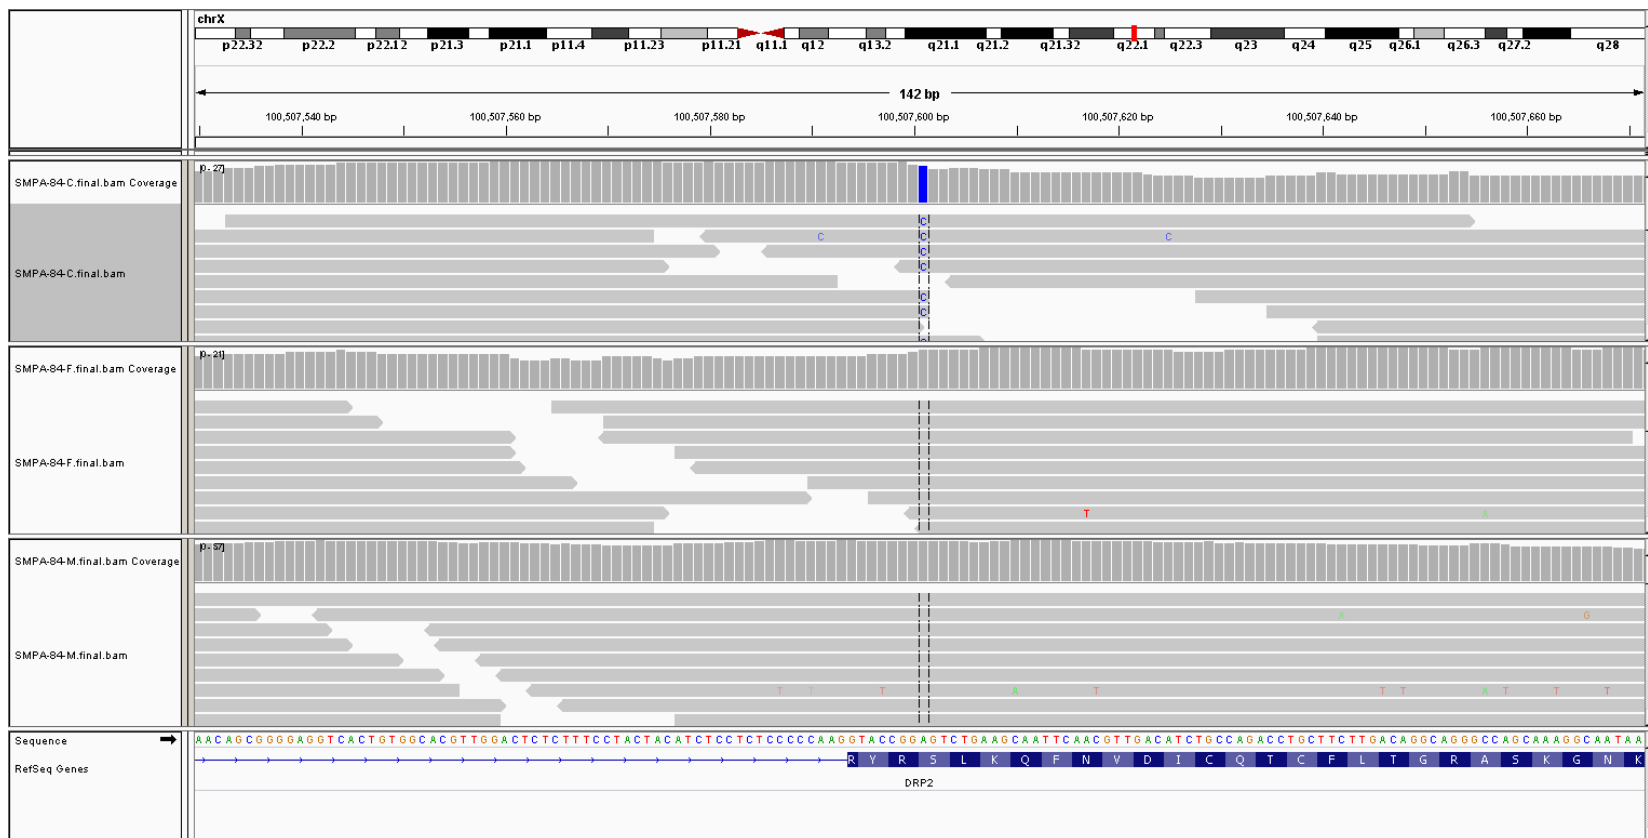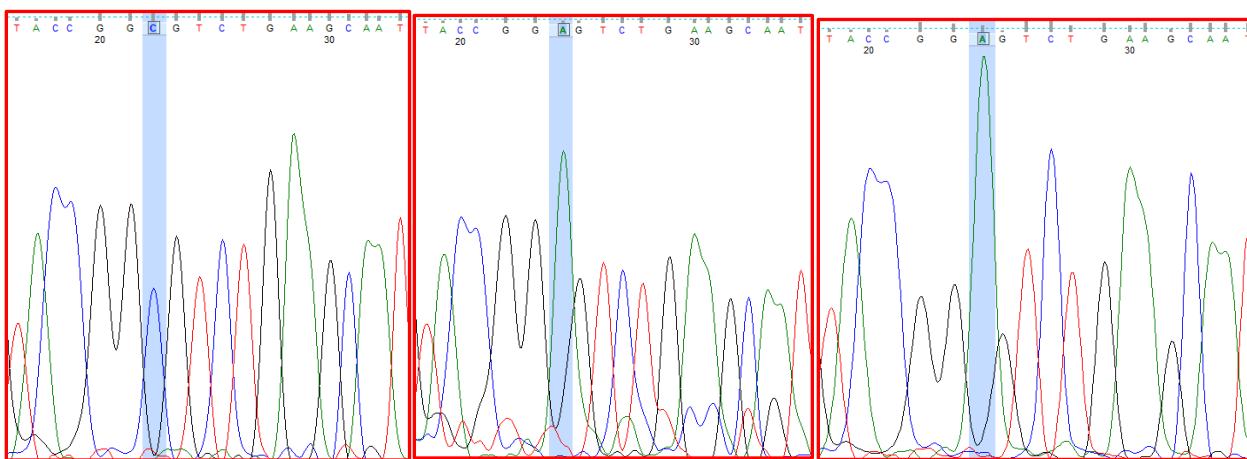

Proband

Father

Mother

19. SMPA78: *MECP2*- de novo

Proband

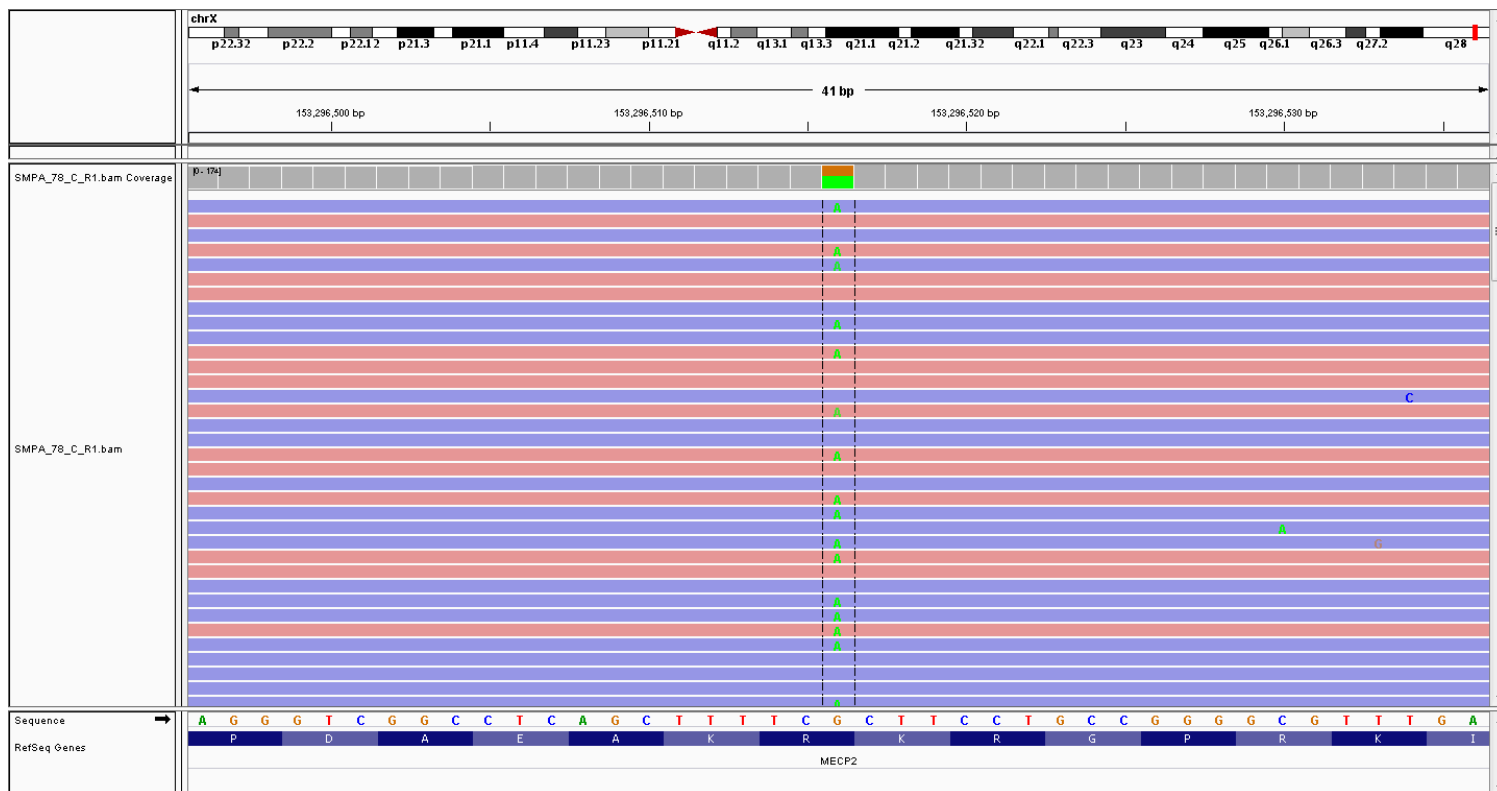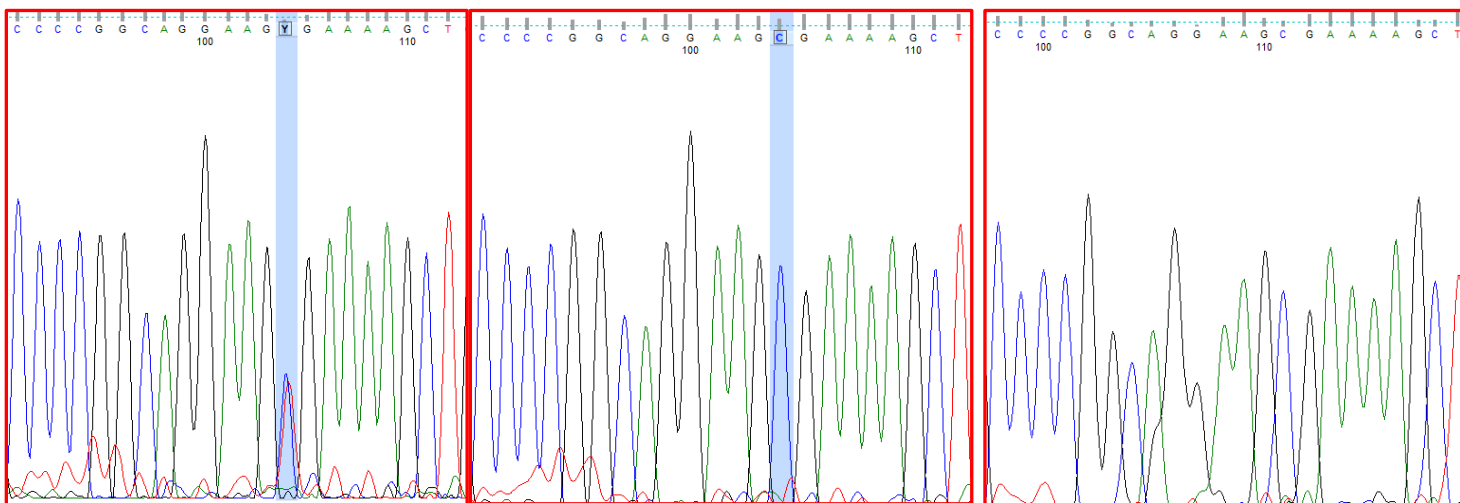

Proband

Father

Mother

Table 5: Biallelic loss CNVs

1. SMPA4: 14q11.2: *DHRS4/DHRS4L*

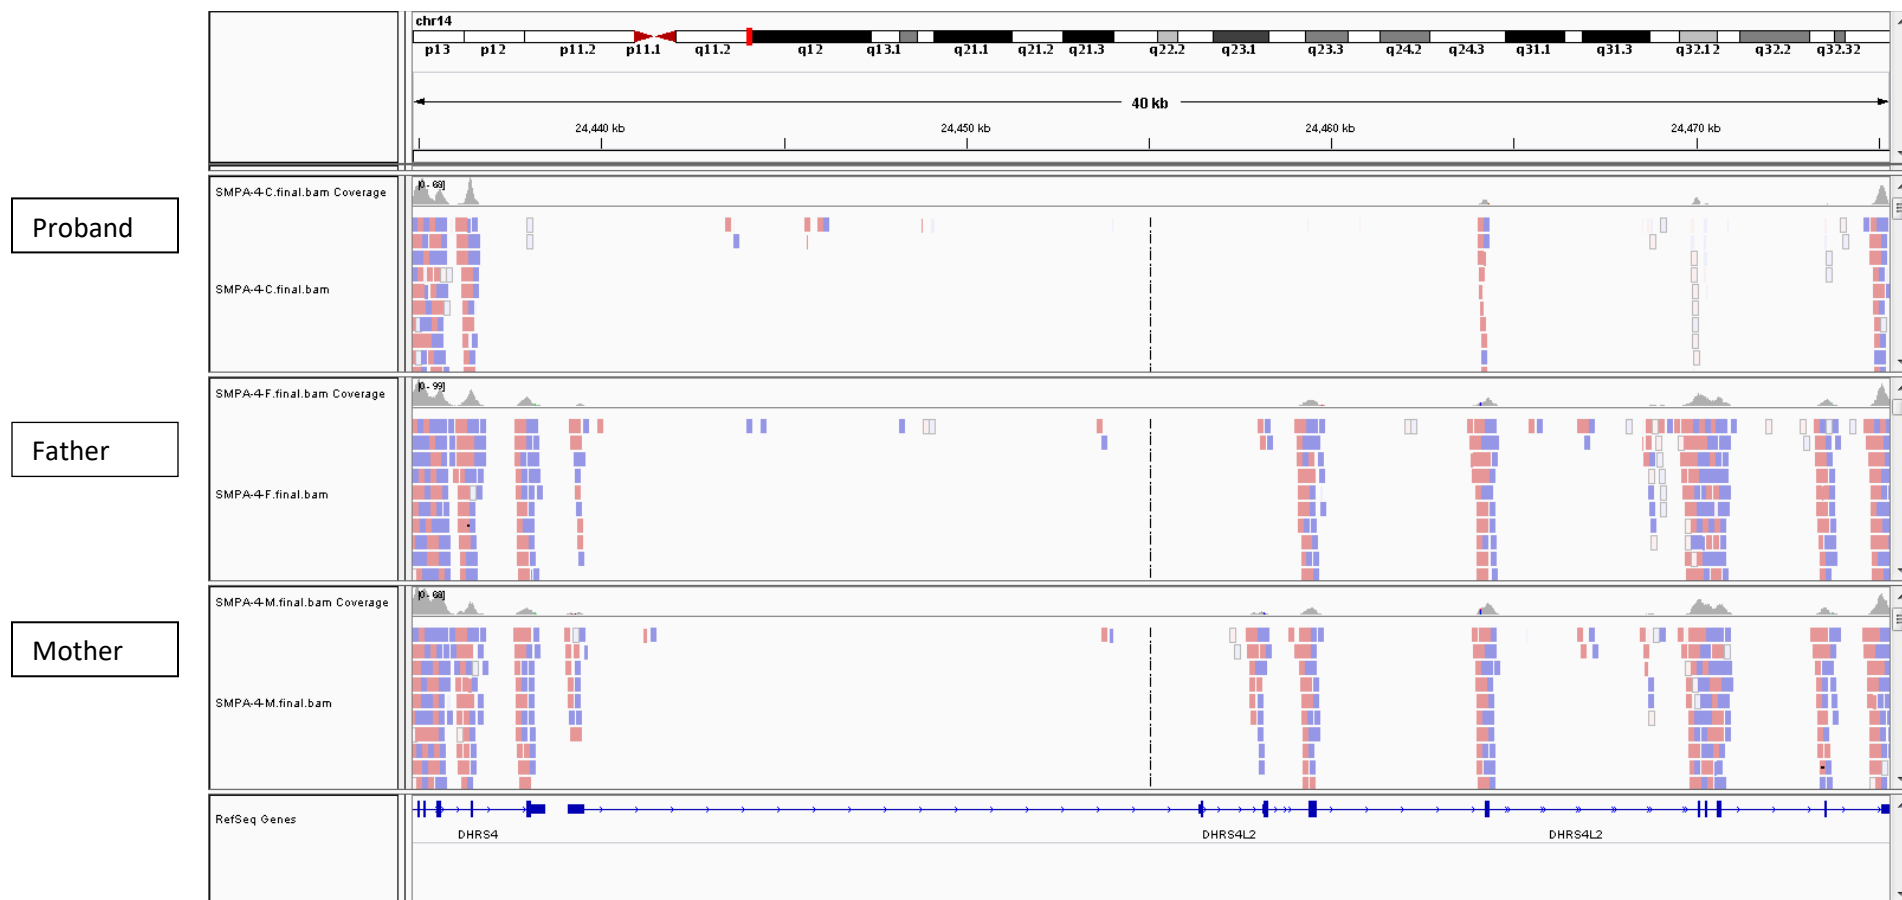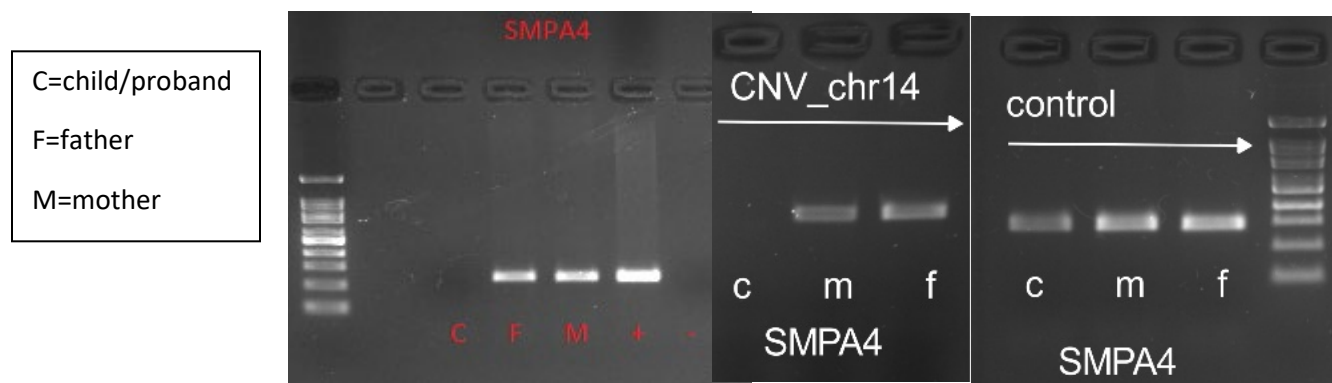



## 2. SMPA4: SEMG1

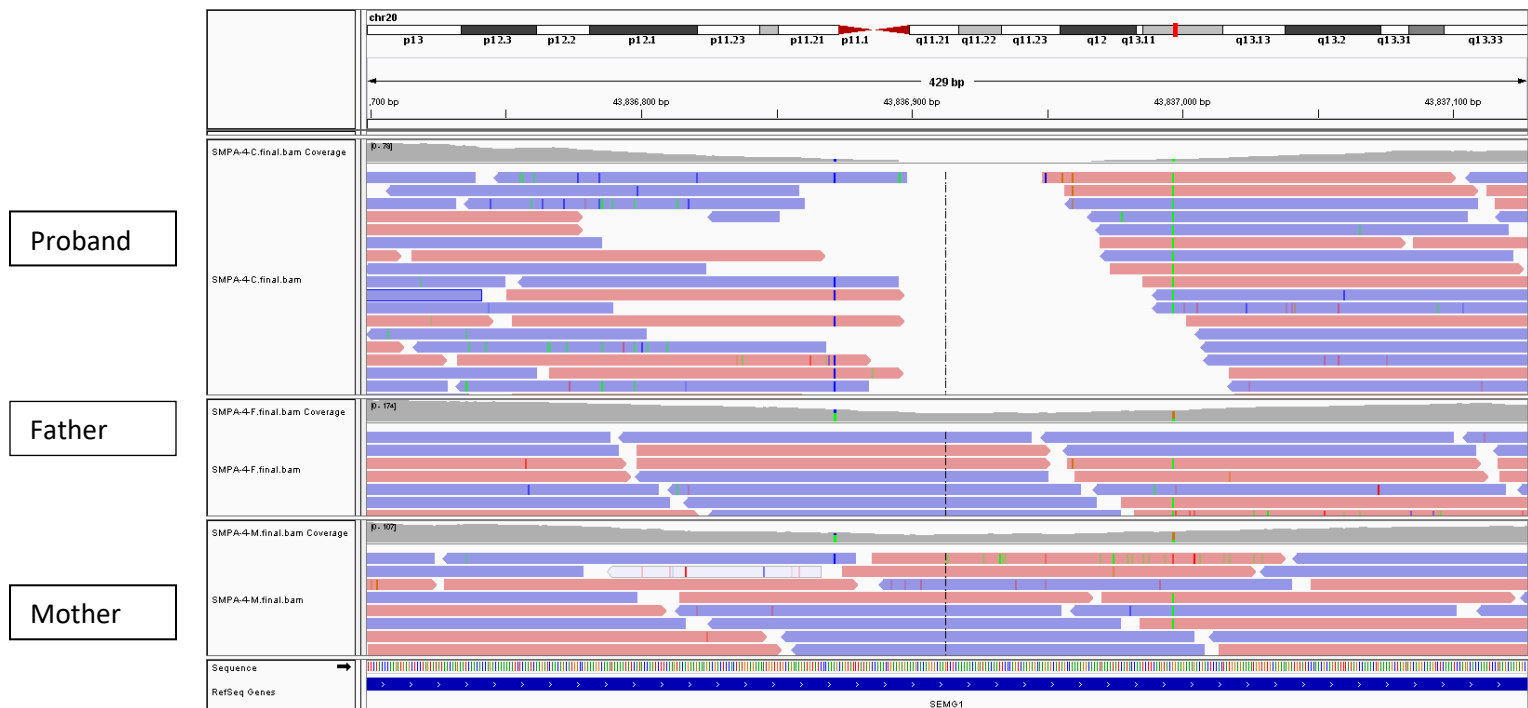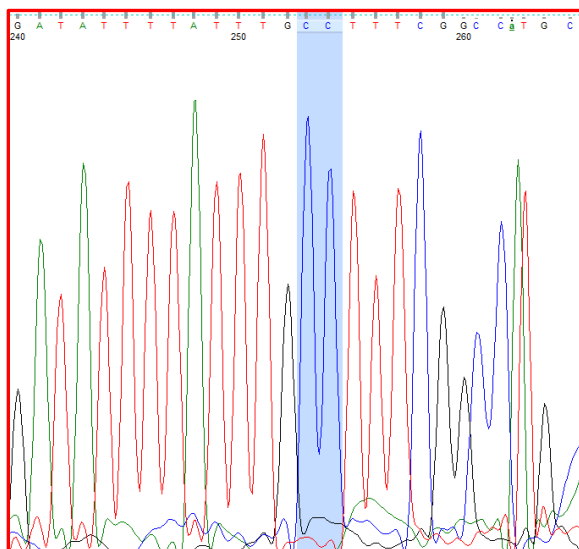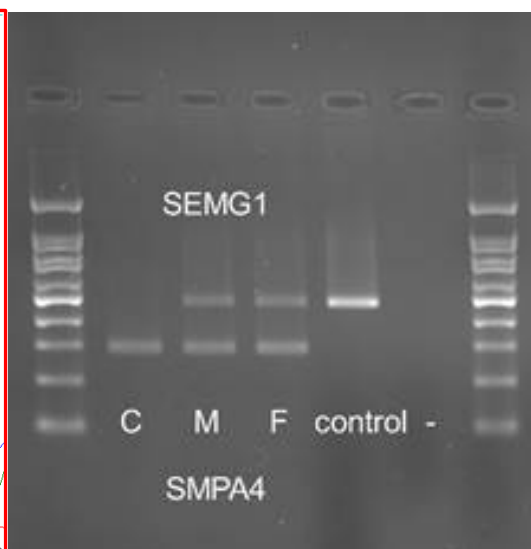

Proband (showing 180bp deletion junction)

### 3. SMPA8: 2q32.2: DNAH7

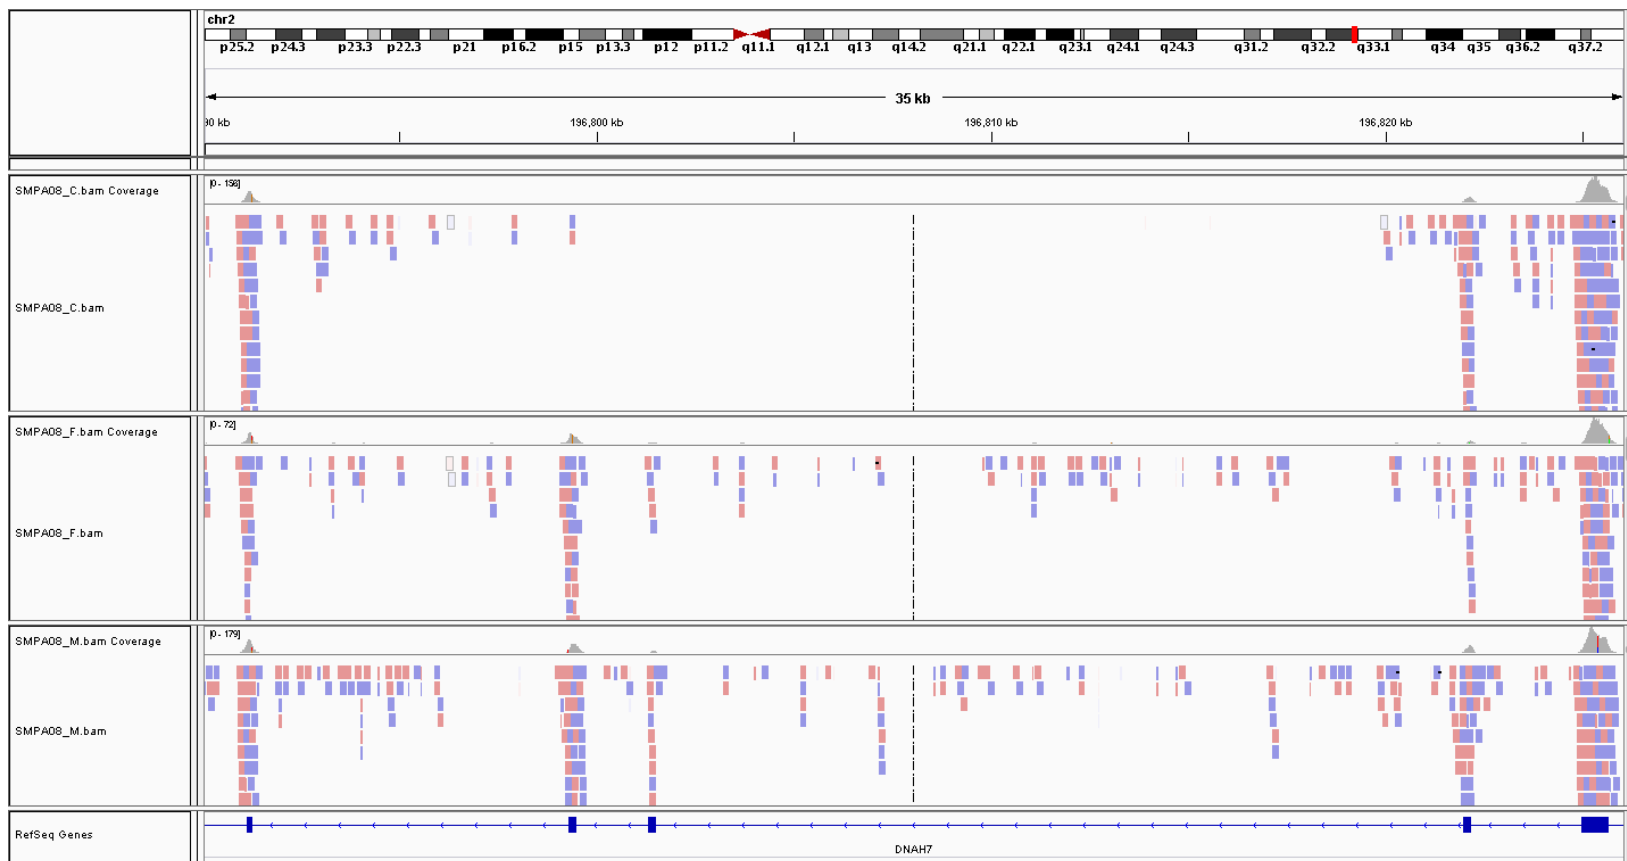

Proband

Father

Mother

C=child/proband  
F=father  
M=mother

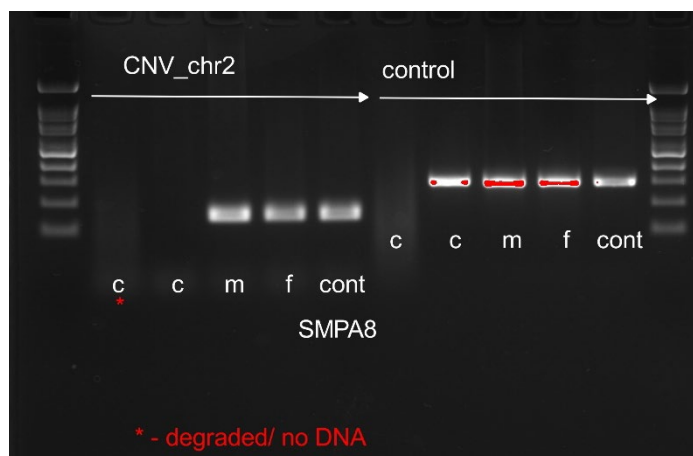

#### 4. SMPA8: VRK:

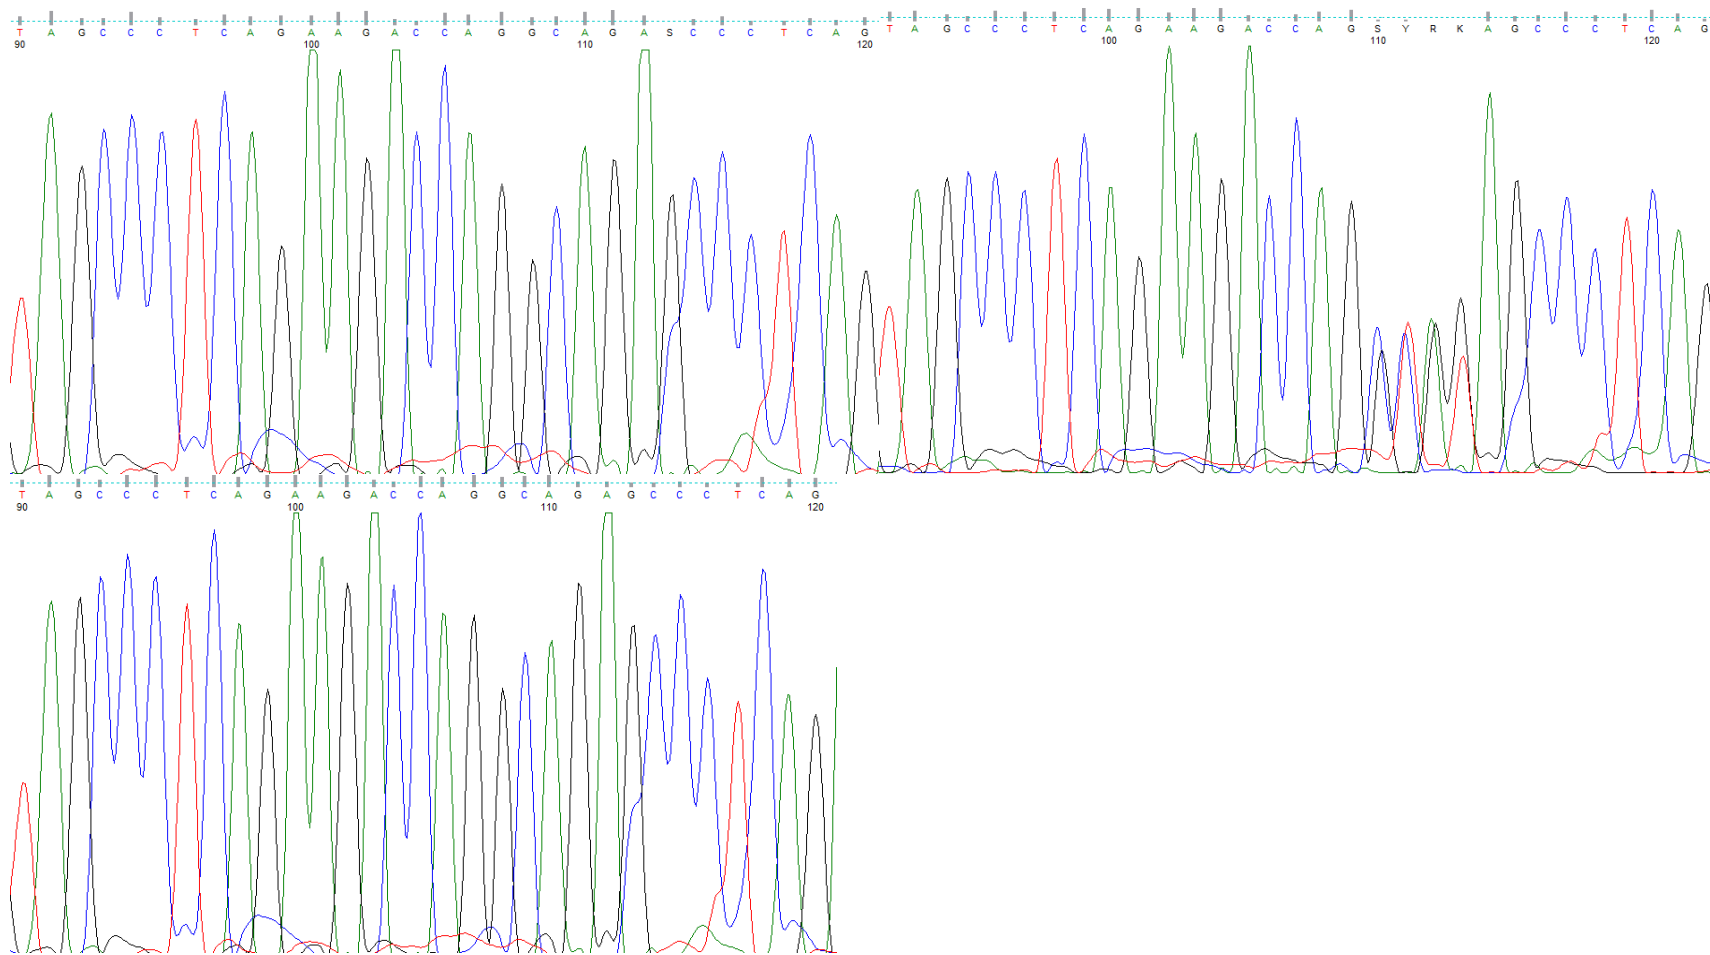

5. SMPA3: 5q31.3: *PCDHA9*, *PCDHA10*

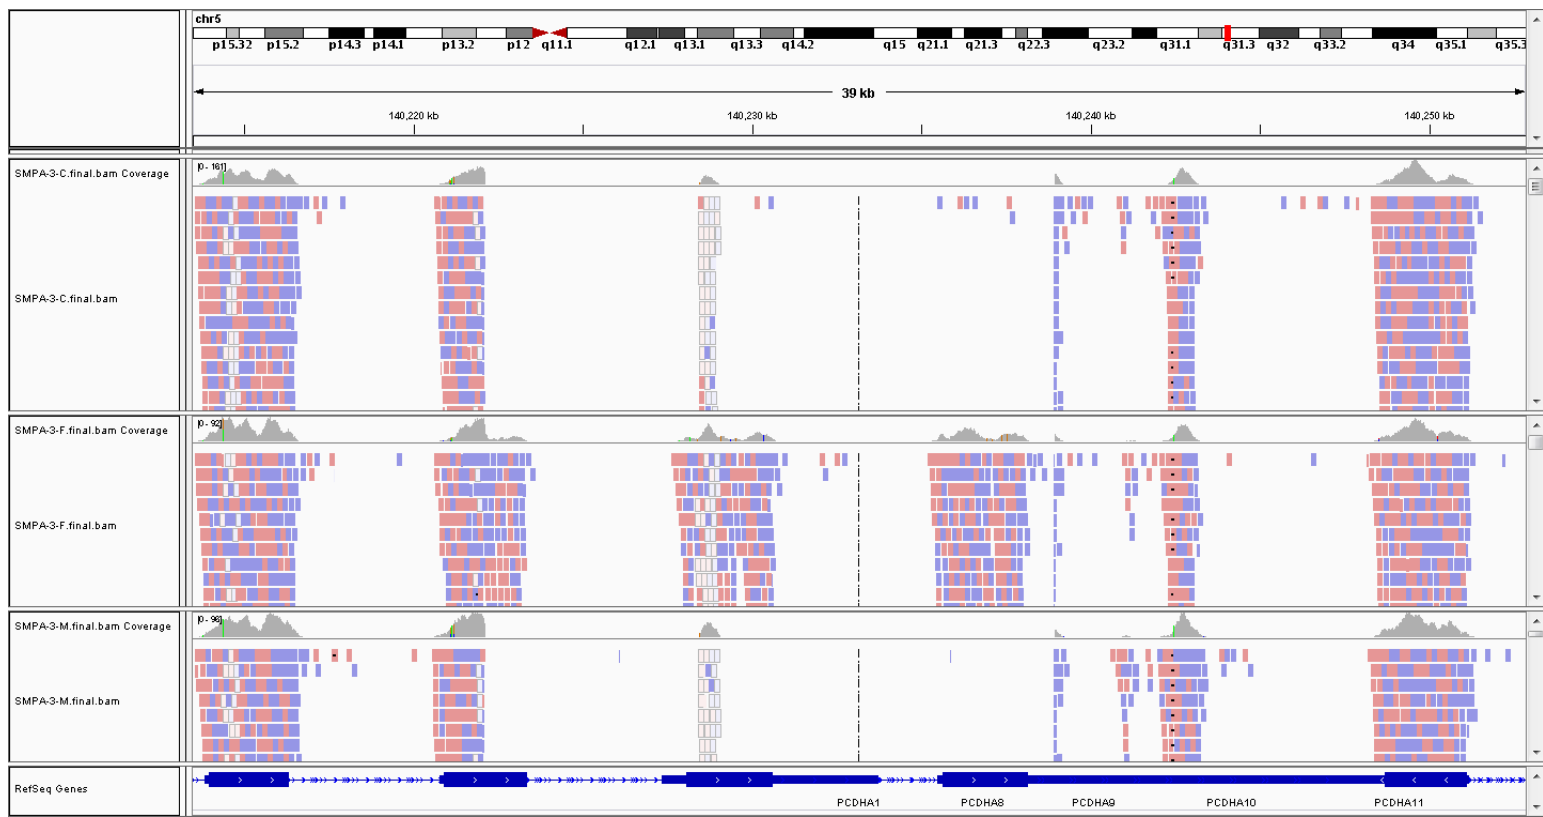

C=child/proband  
 F=father  
 M=mother

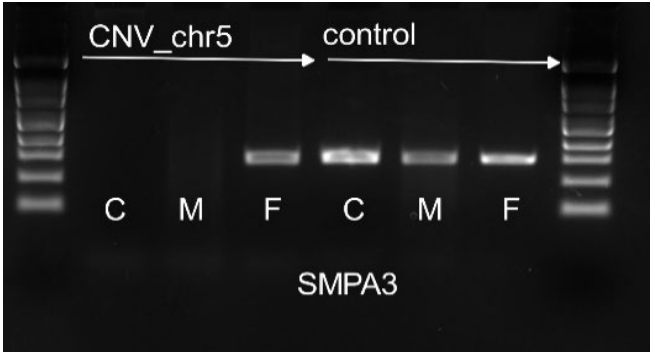

6. IAH2: 5q31.3: *PCDHA9*, *PCDHA10*

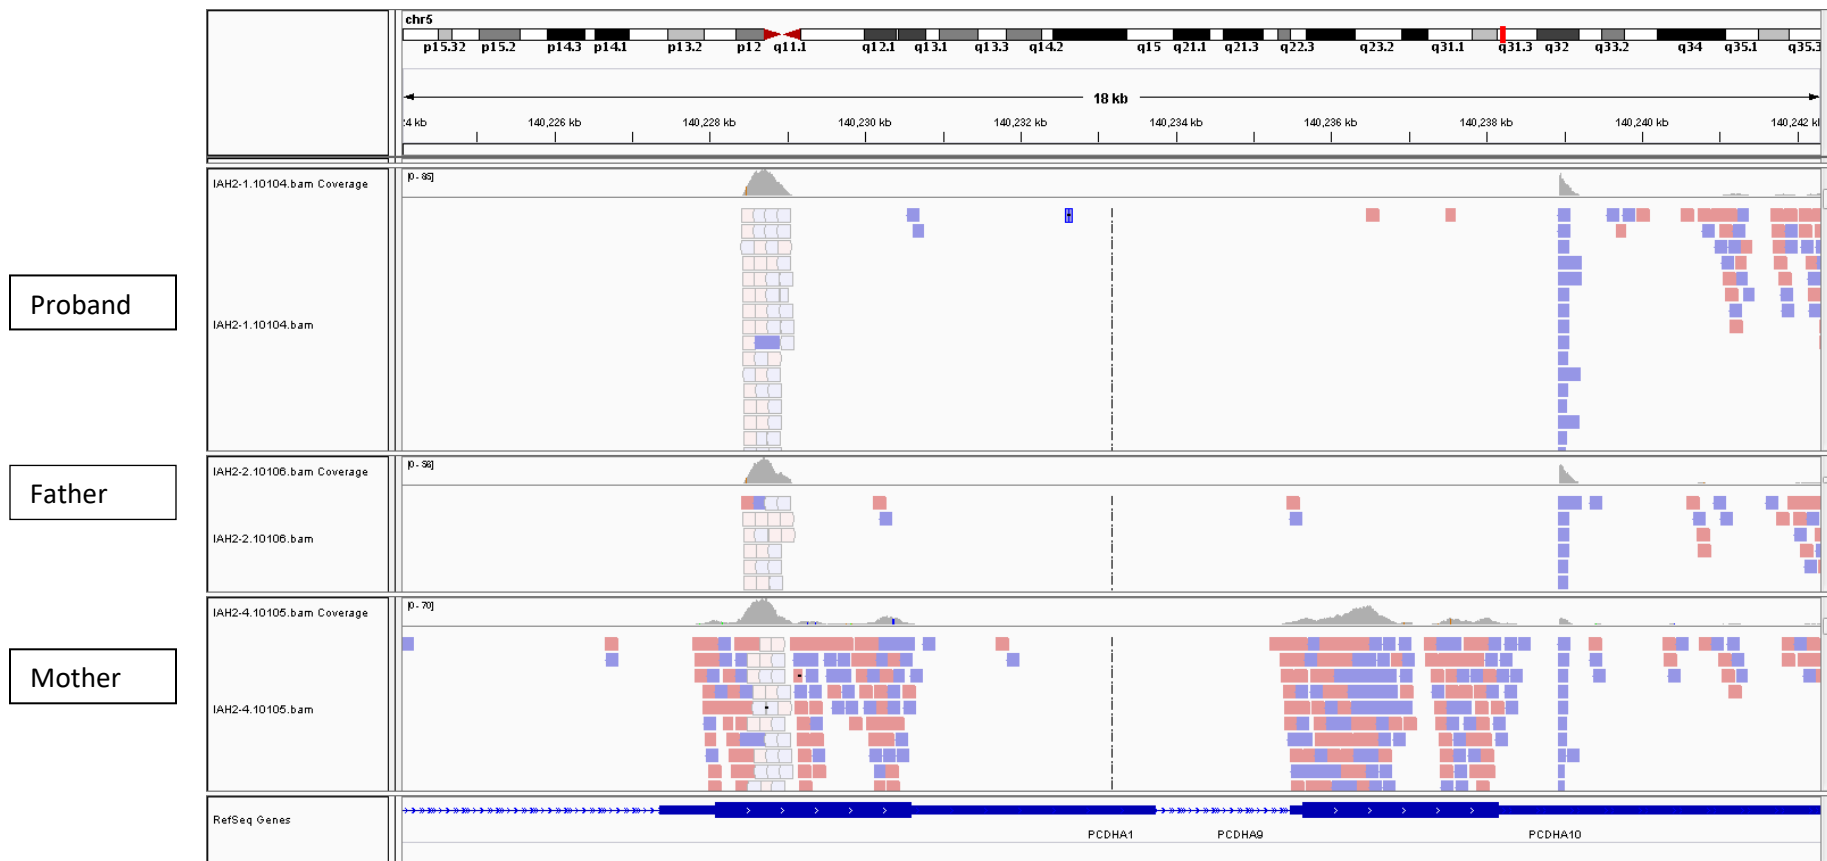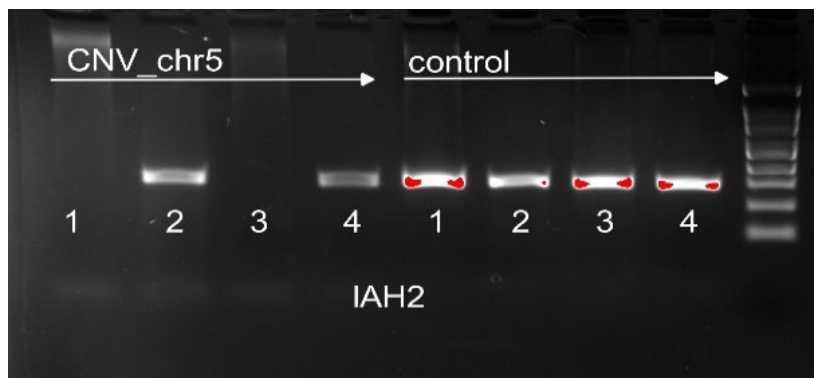

1=proband; 2=unaffected brother; 3=father; 4=mother

7. IAU79: 20p13: *SIRPB1*

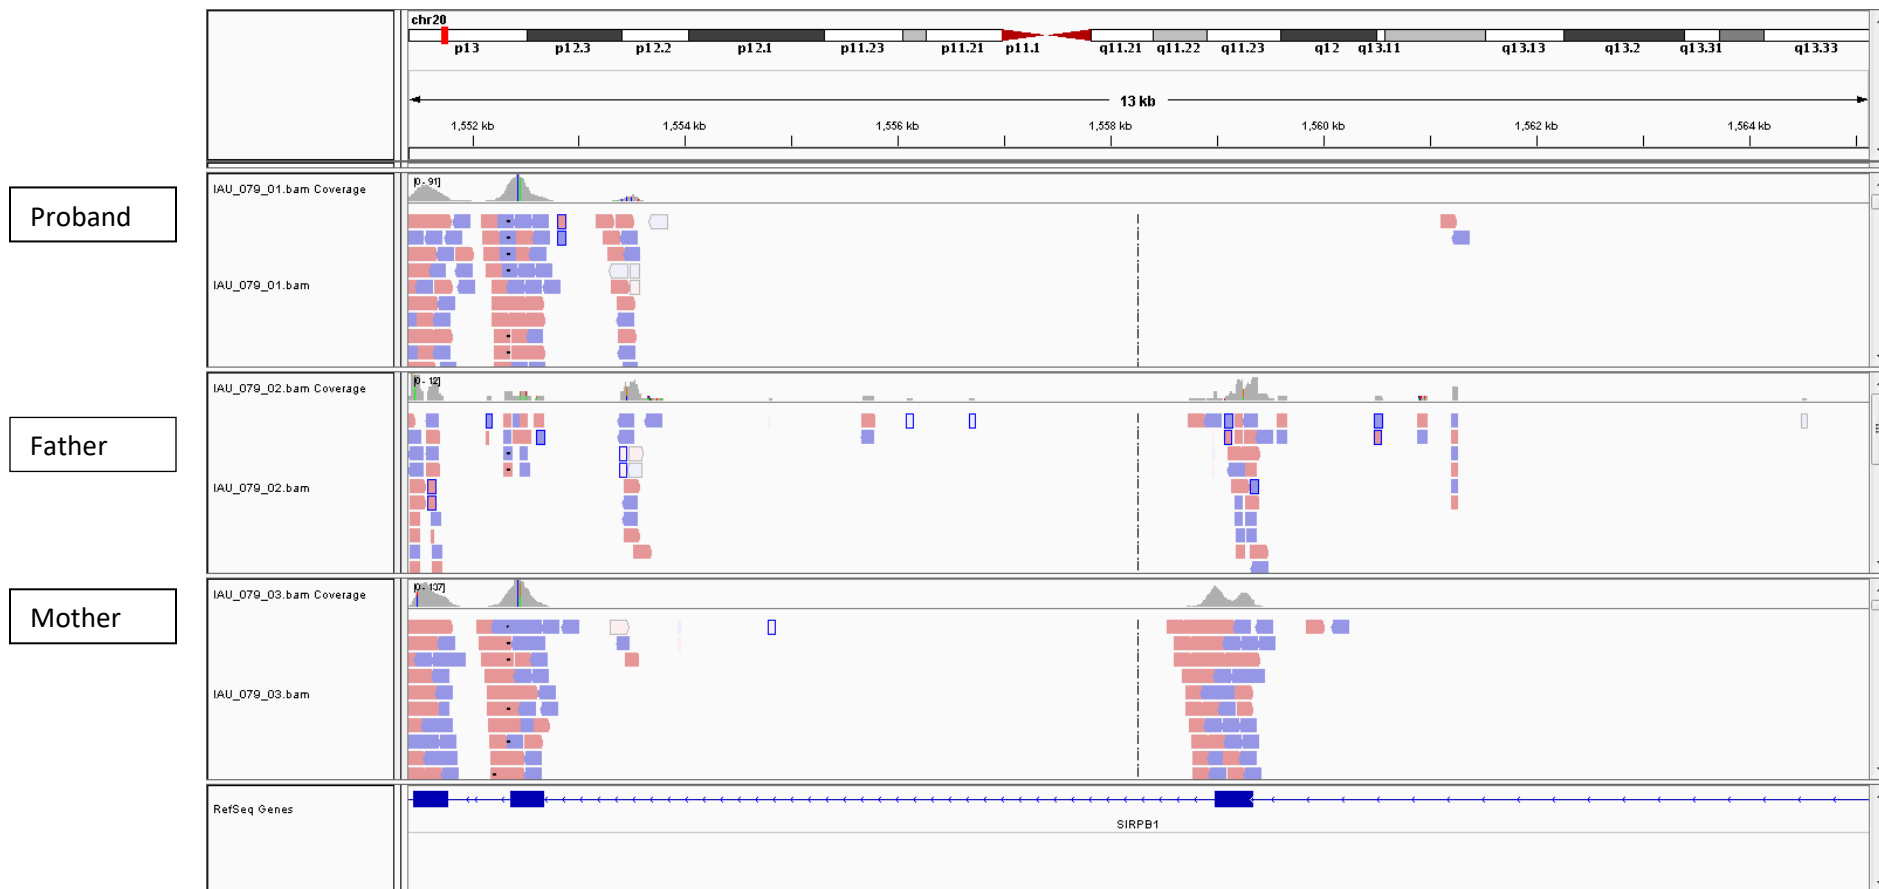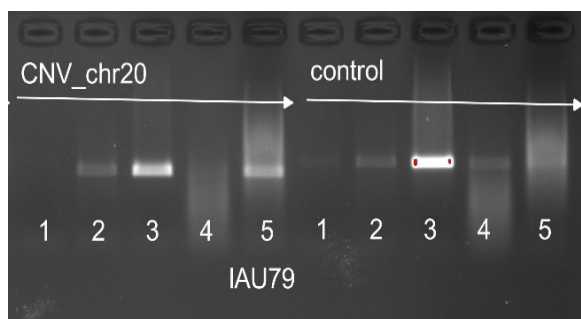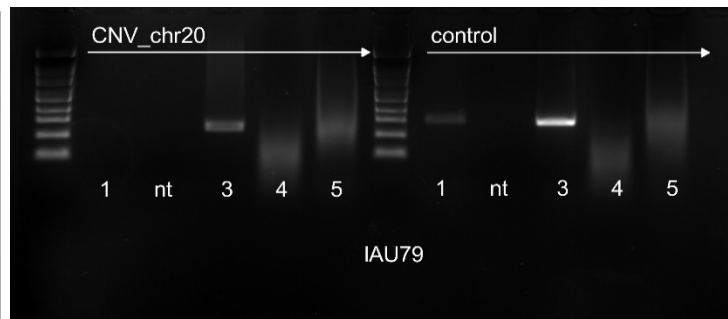

8. IABB2: 17p13.2: *SHPK* (validated by PCR and qPCR)

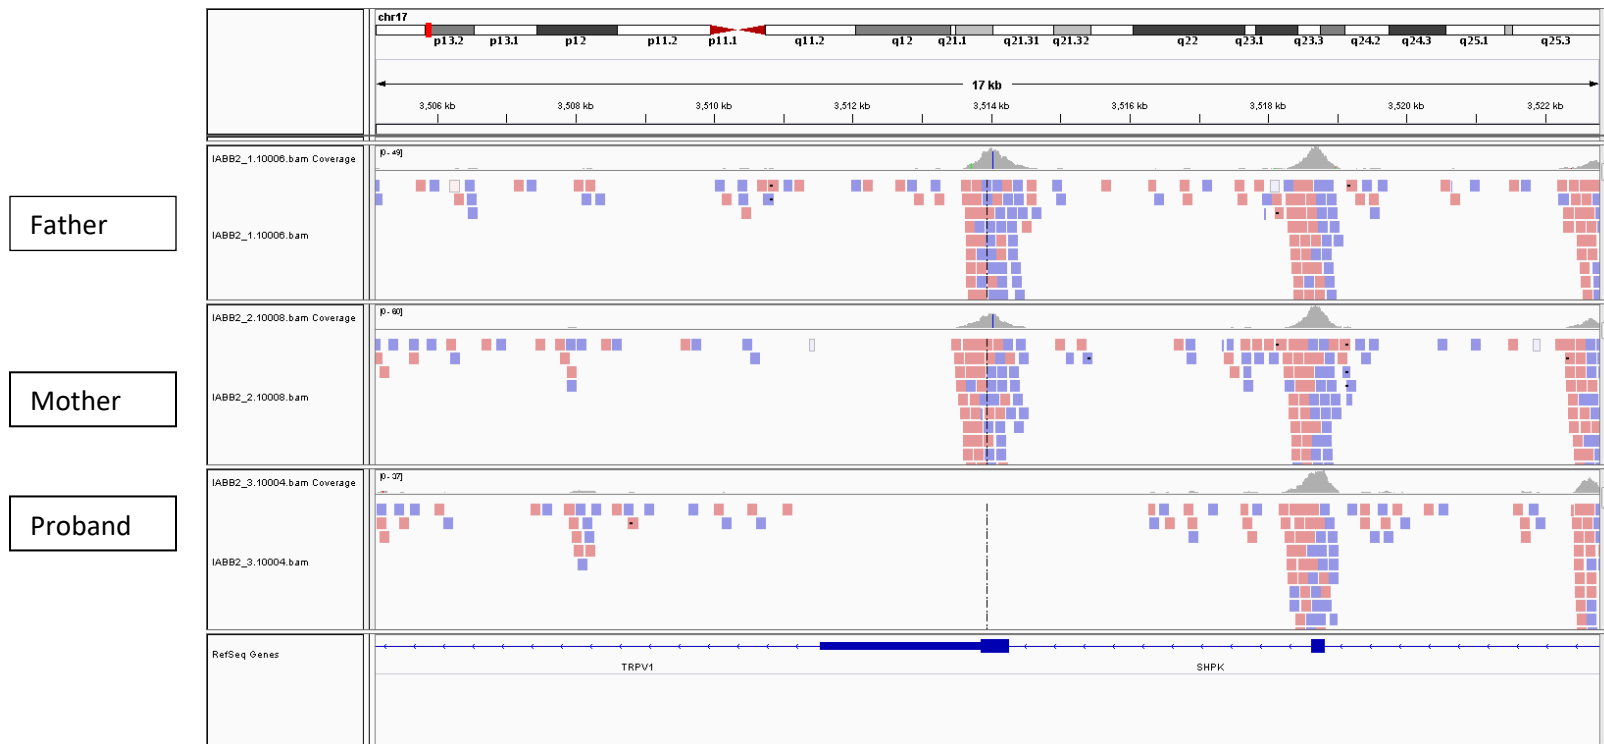

**RQ vs Sample**

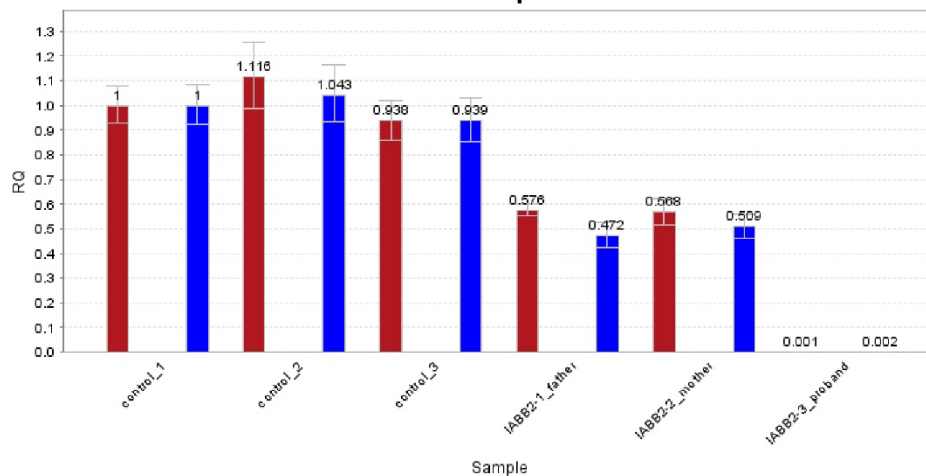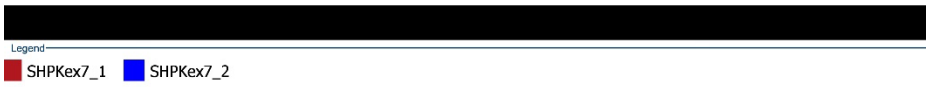

9. IABB14: *WDR73*



10. IABB14: 19q13.2: CYP2A7

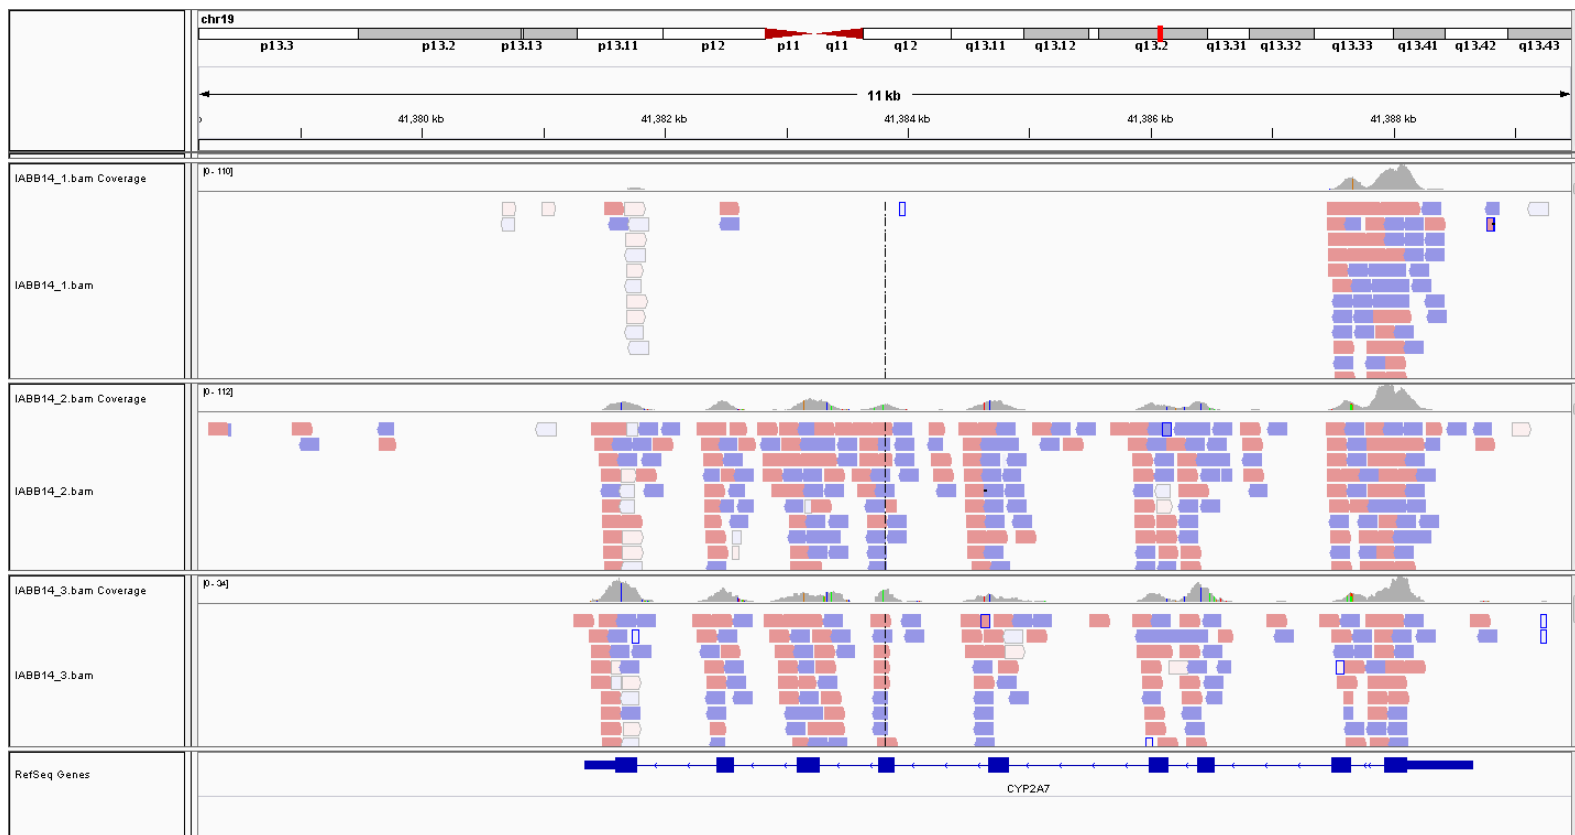

Proband

Father

Mother

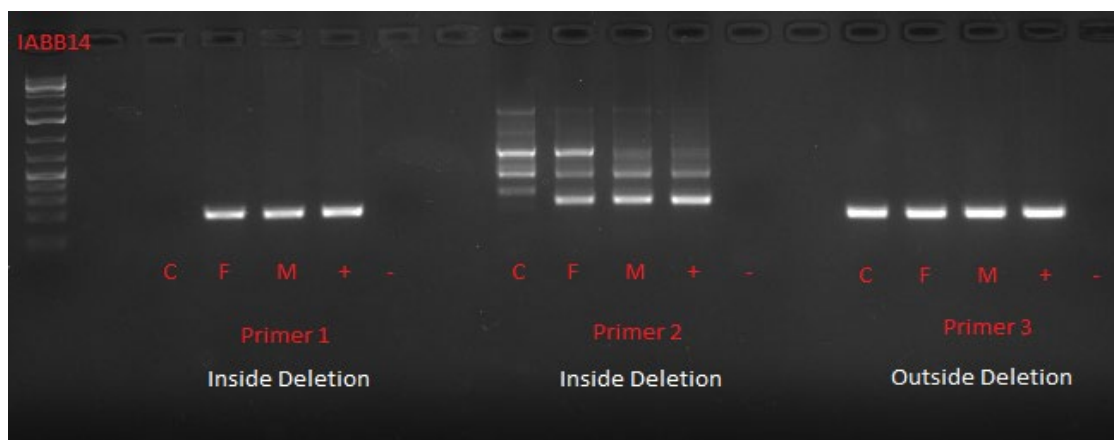

C=child/proband  
 F=father  
 M=mother  
 +=positive control  
 -=negative control

Exon 8

Intron 4

Exon 1/Intron 1

11. IABB14: 19q13.33: *KLK15* (validated by PCR and qPCR)

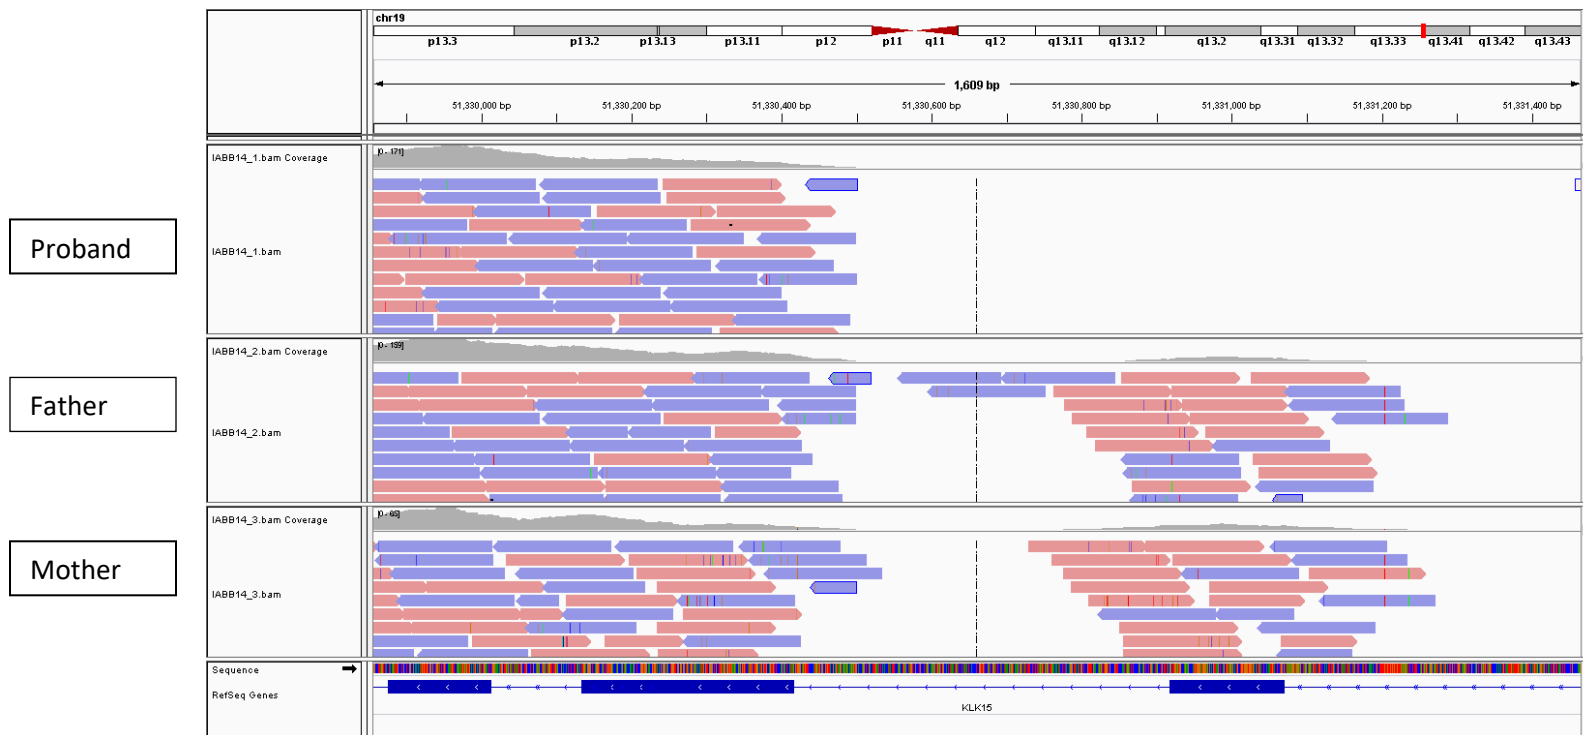

RQ vs Sample

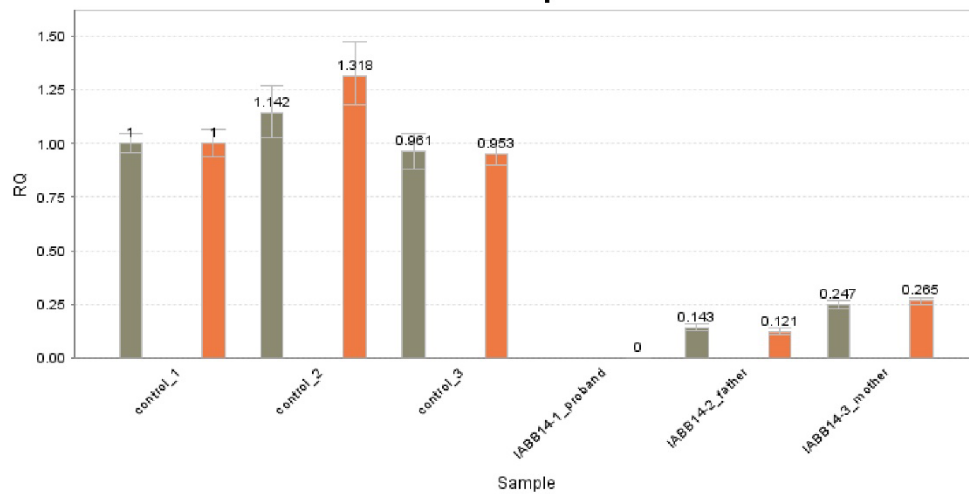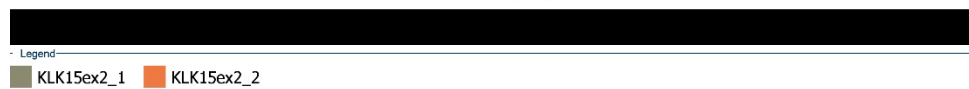

## 12. SMPA42: Xp11.23: ZNF630/SSX6

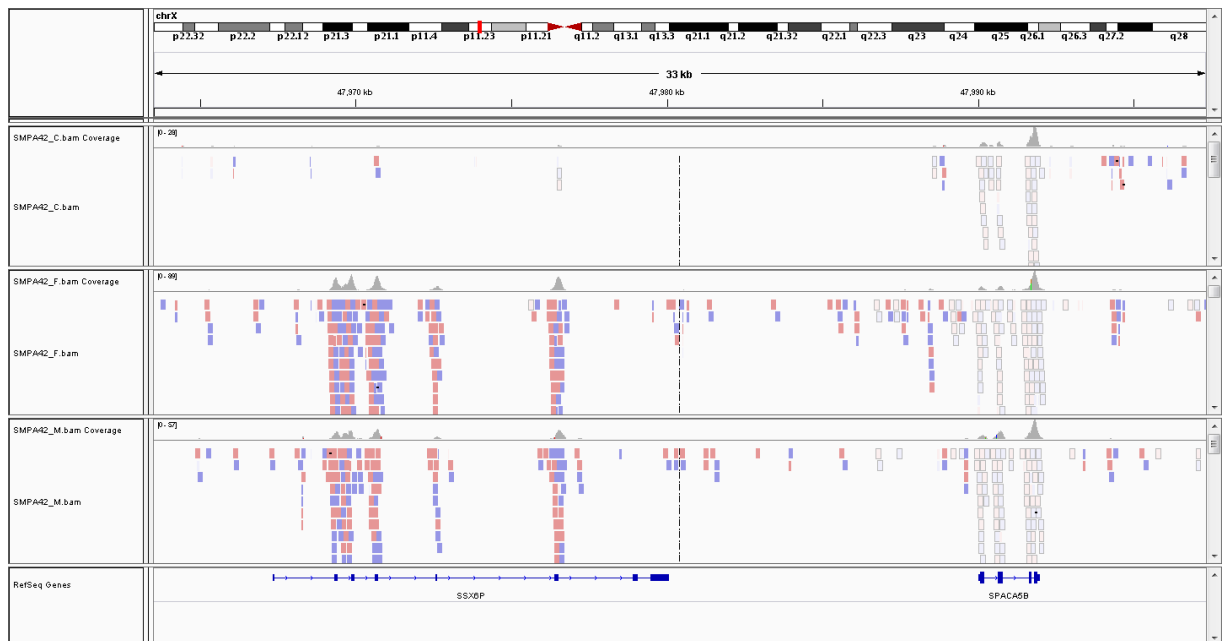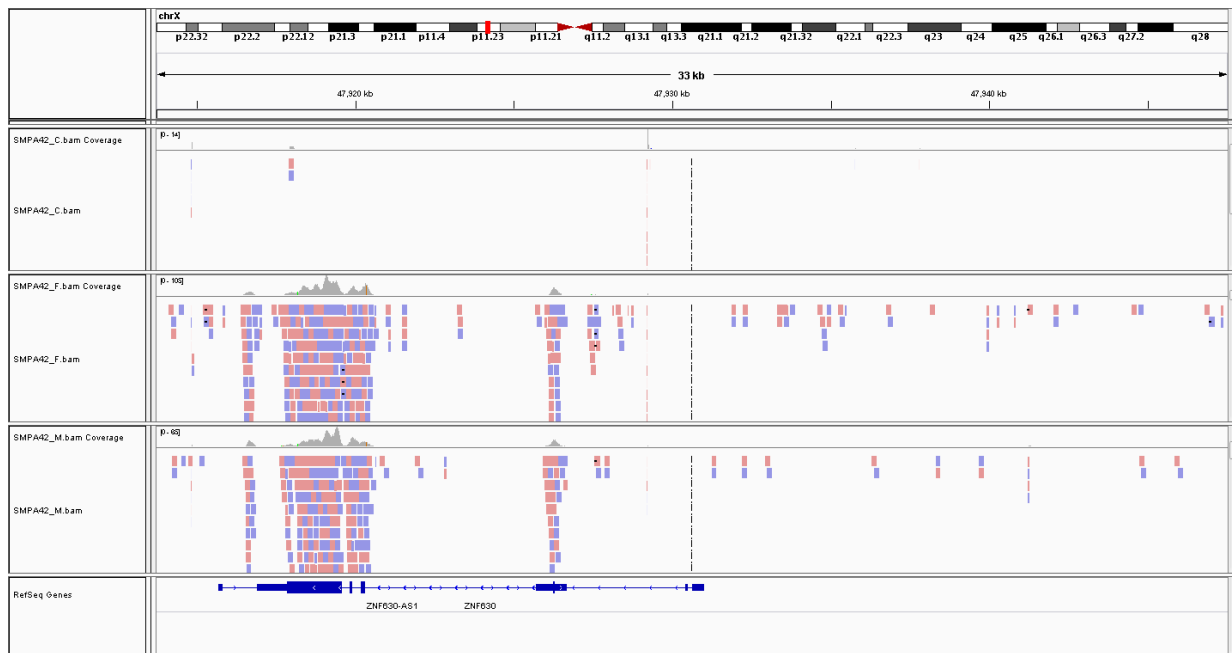

### 13. SMPA9: Xp11.23: ZNF630/SSX6

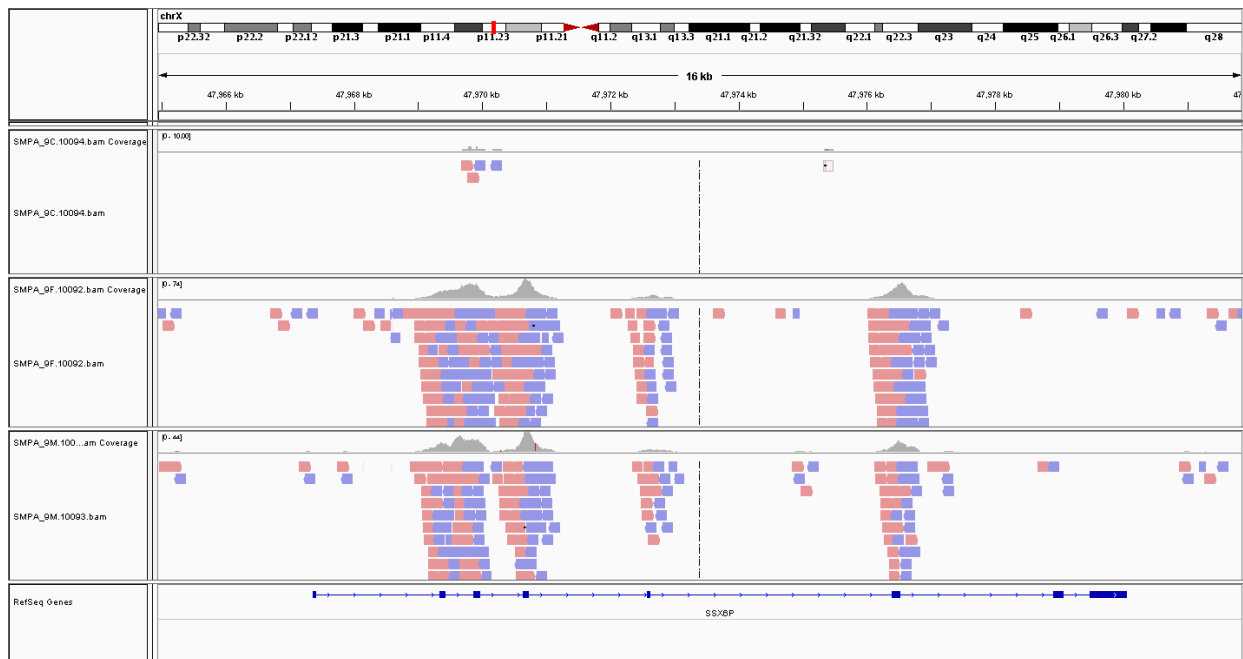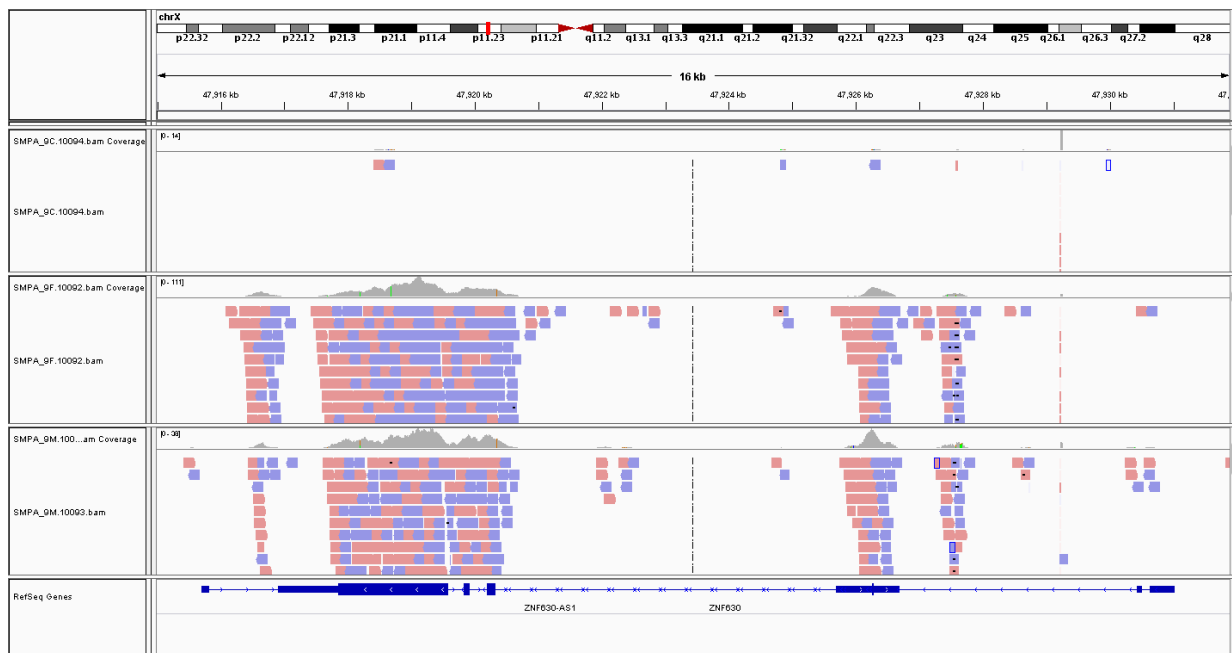

**Table 6: Hemizygous CNVs**

1. SMPA80: Chr9:370,244-13,398,587

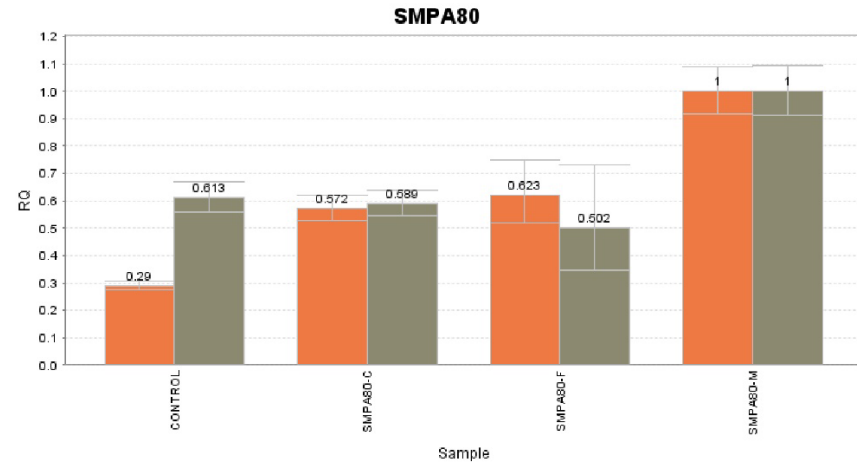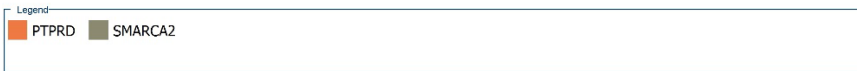

2. IAU25: Chr17:16,778,164-20,364,207

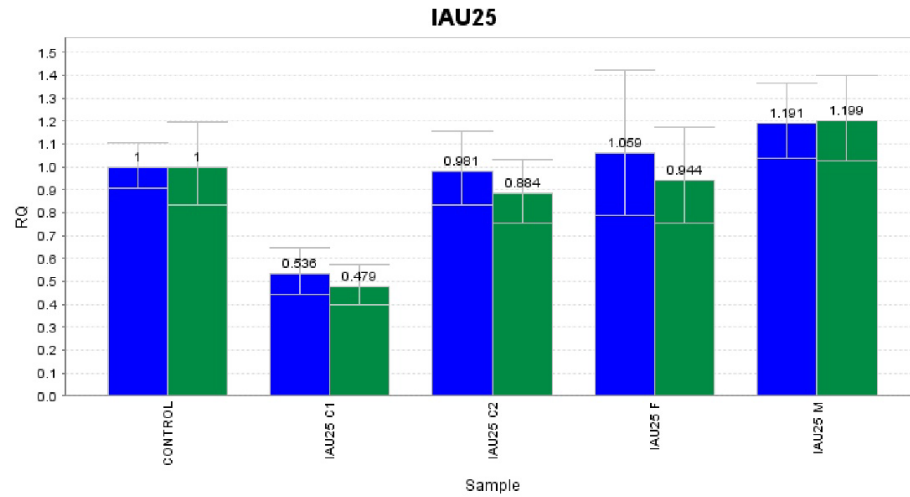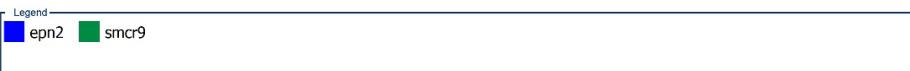

3. IAU74: Chr2:235,370,826-243,034,519

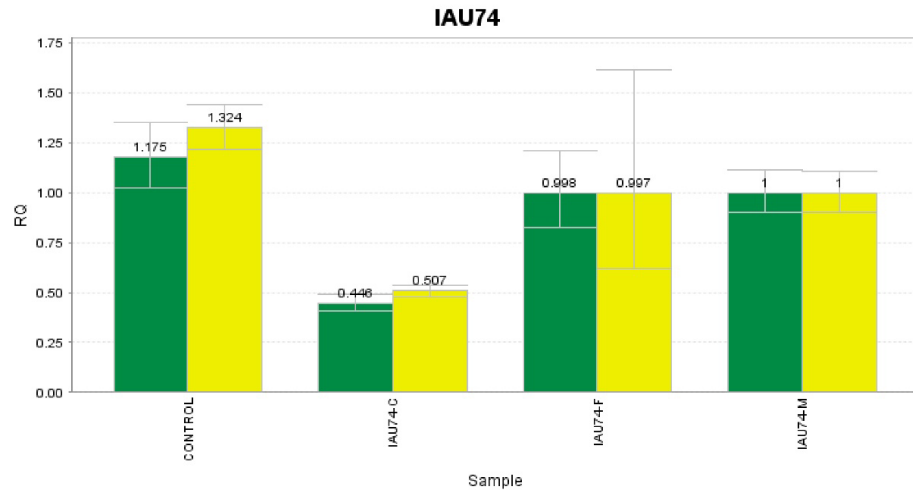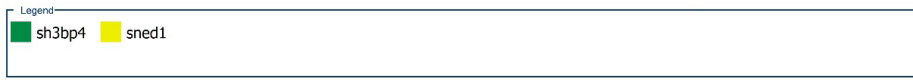

4. IAU7: Chr1:249357-699532

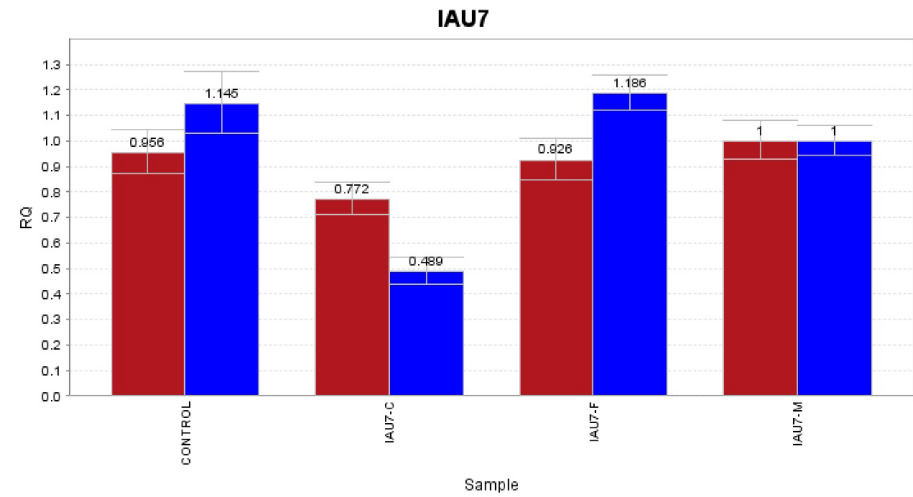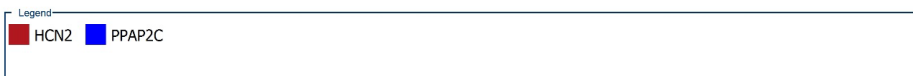

5. SMPA15: Chr15:91,290,633-91,347,451
6. SMPA15: Chr15:40,477,419-41,026,994

### SMPA15

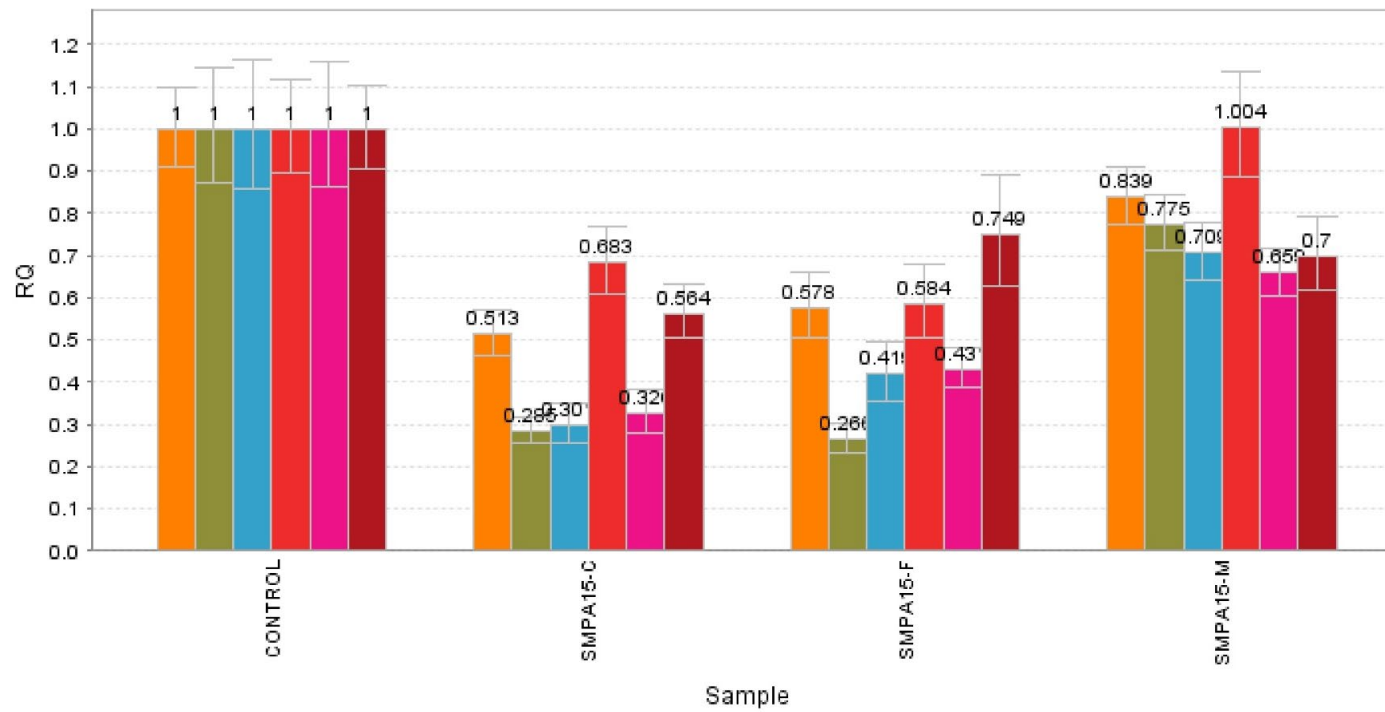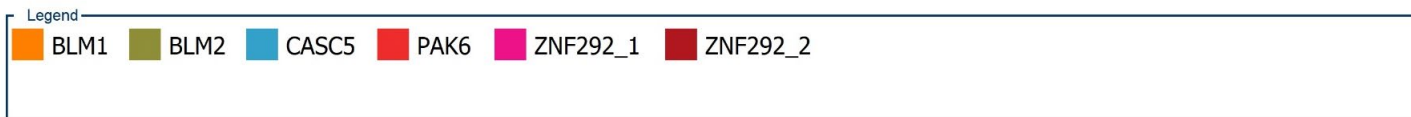

Supplement: Supplementary file [file media-1.pdf]
