# Supplementary material for: Autism spectrum disorder trios from consanguineous populations are enriched for rare biallelic variants, identifying 32 new candidate genes
Source: bioRxiv or medRxiv preprint supplement (doi:10.1101/2021.12.24.21268340), 2024-10-08

2. IABB16: *CLCA4*

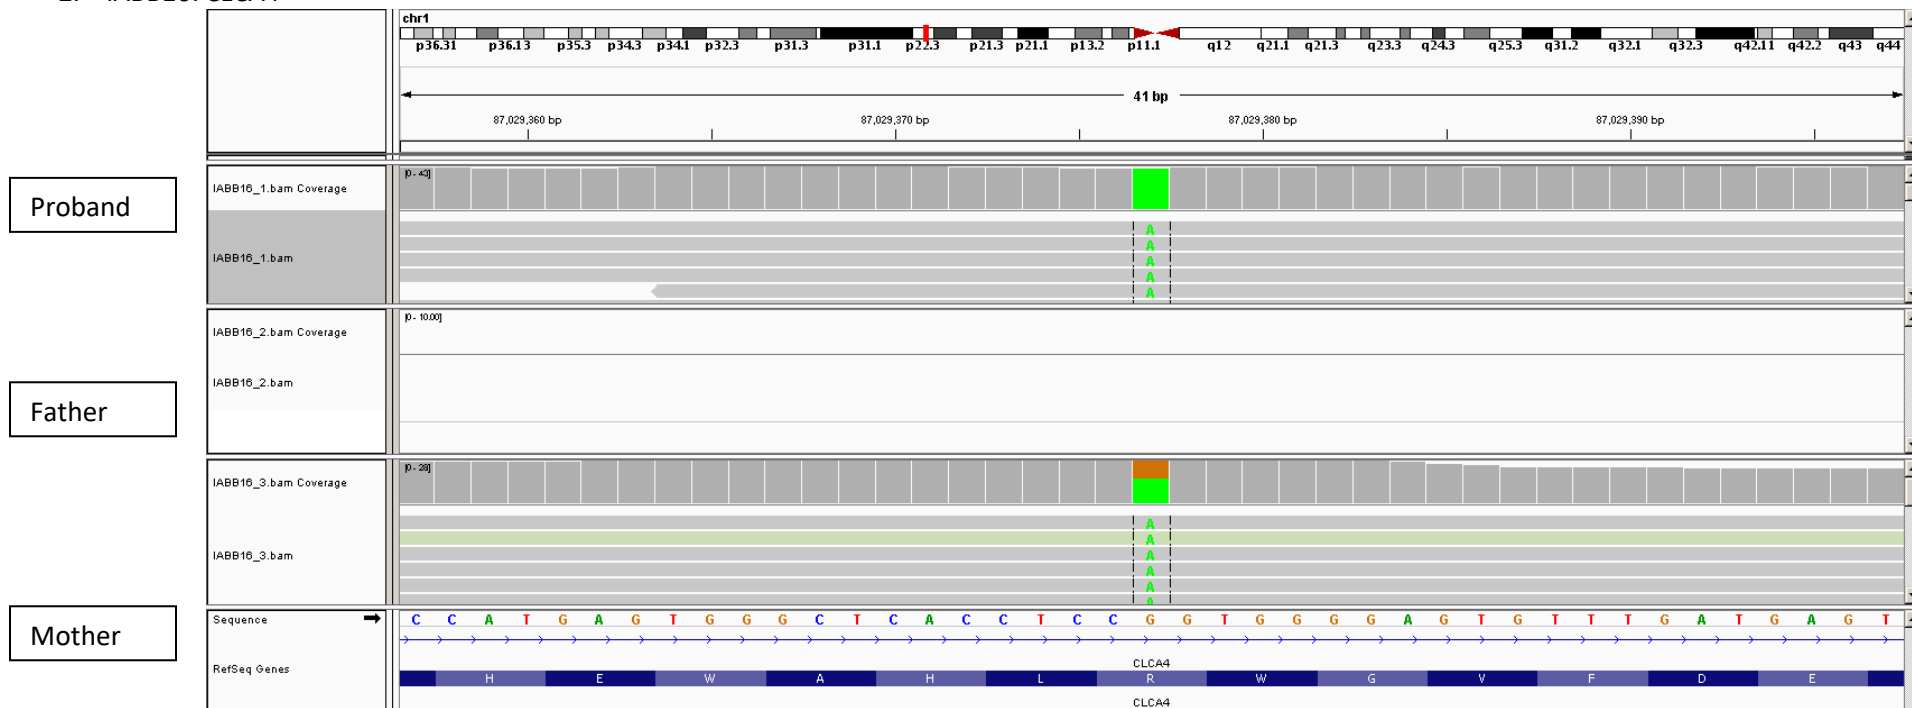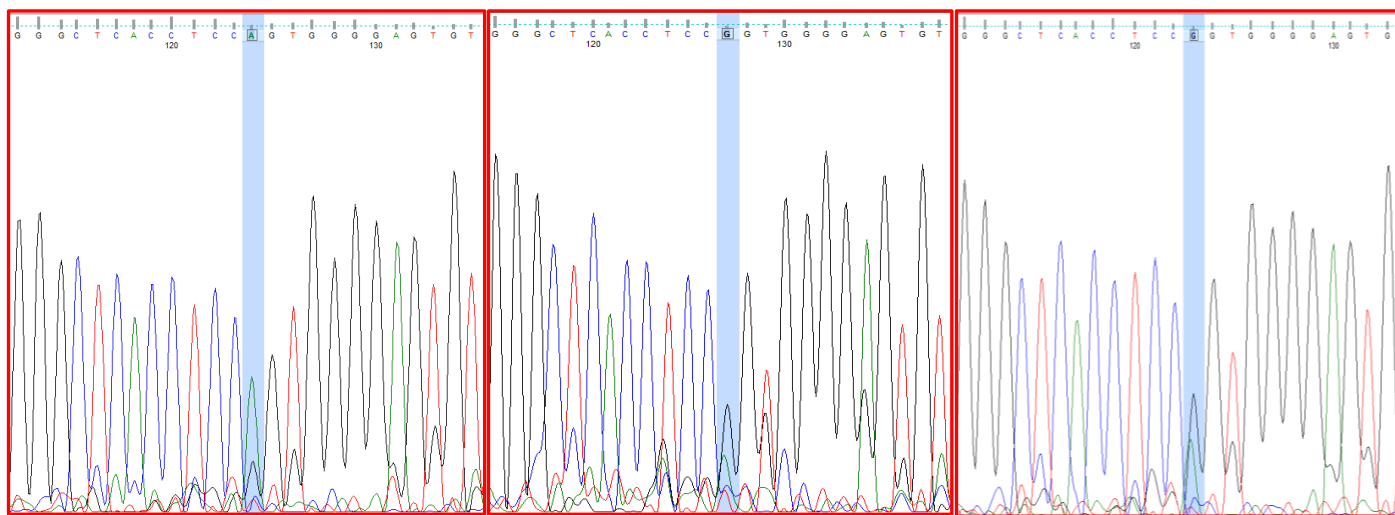

Proband

Father

Mother

### 3. SMPA4: *HRNR*

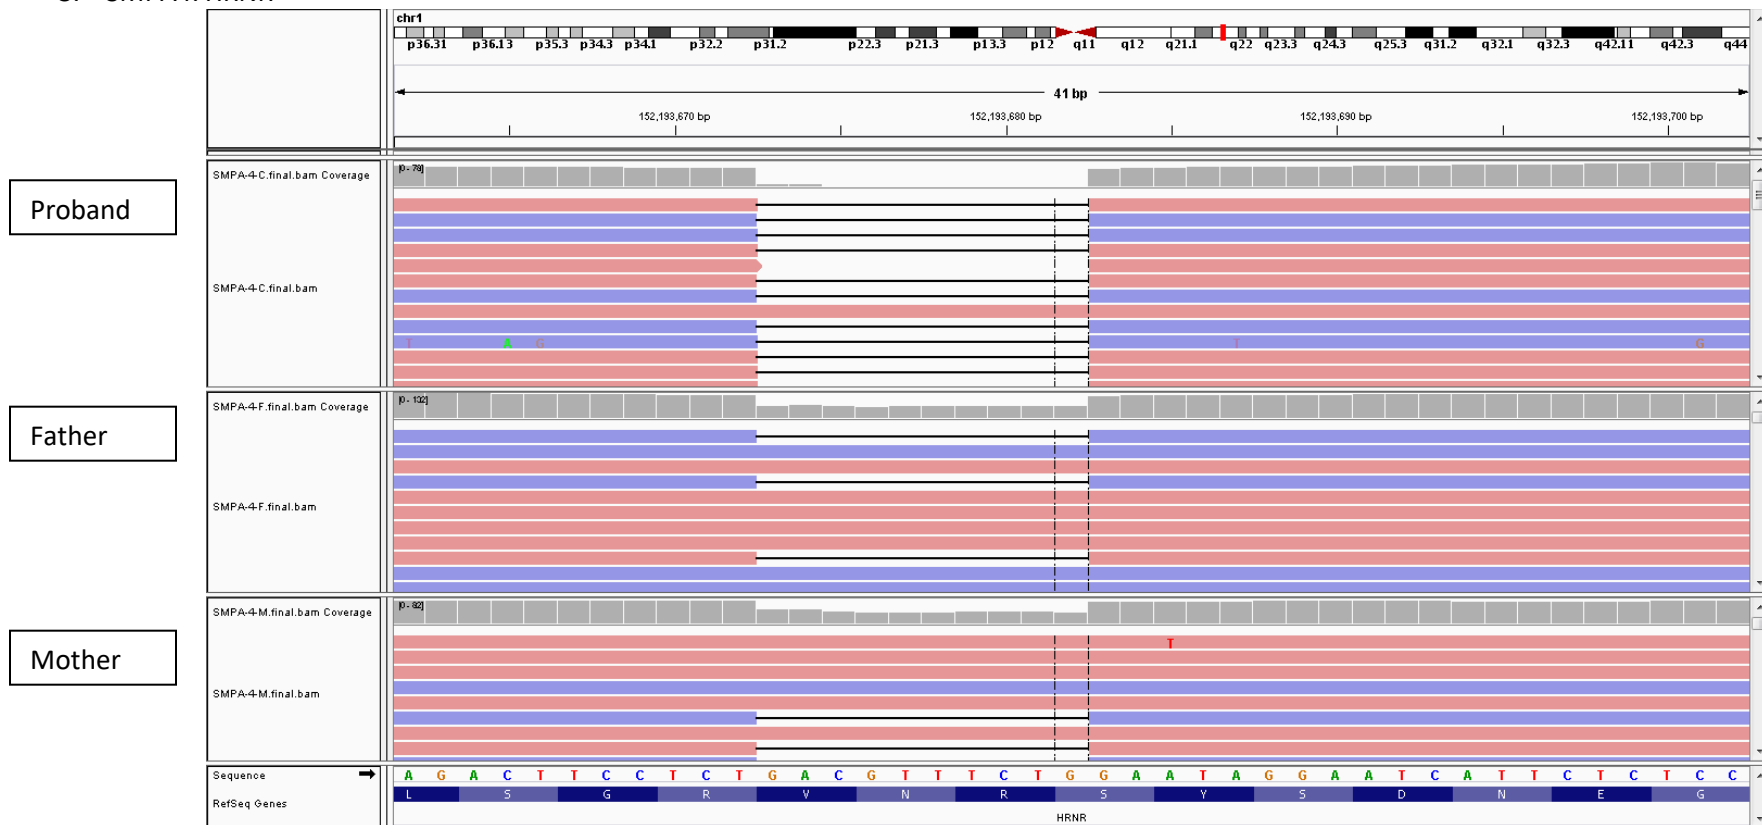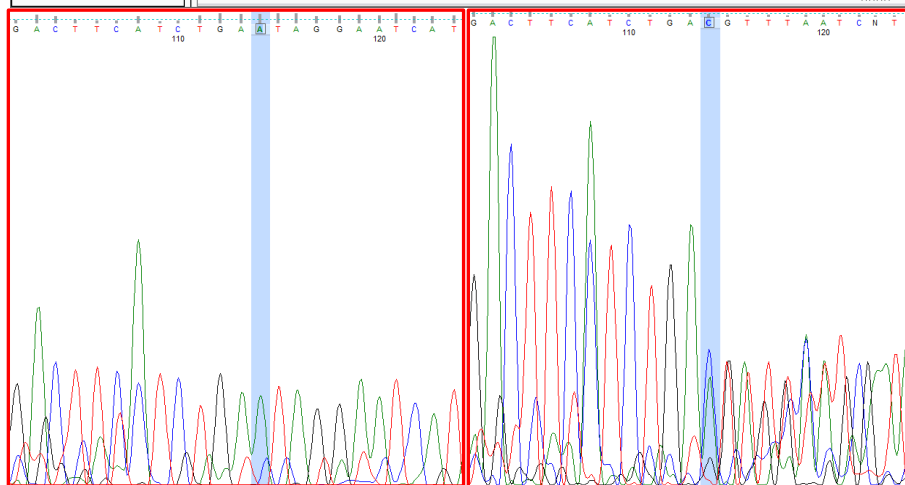

Proband

Mother

#### 4. SMPA76: ILDR2

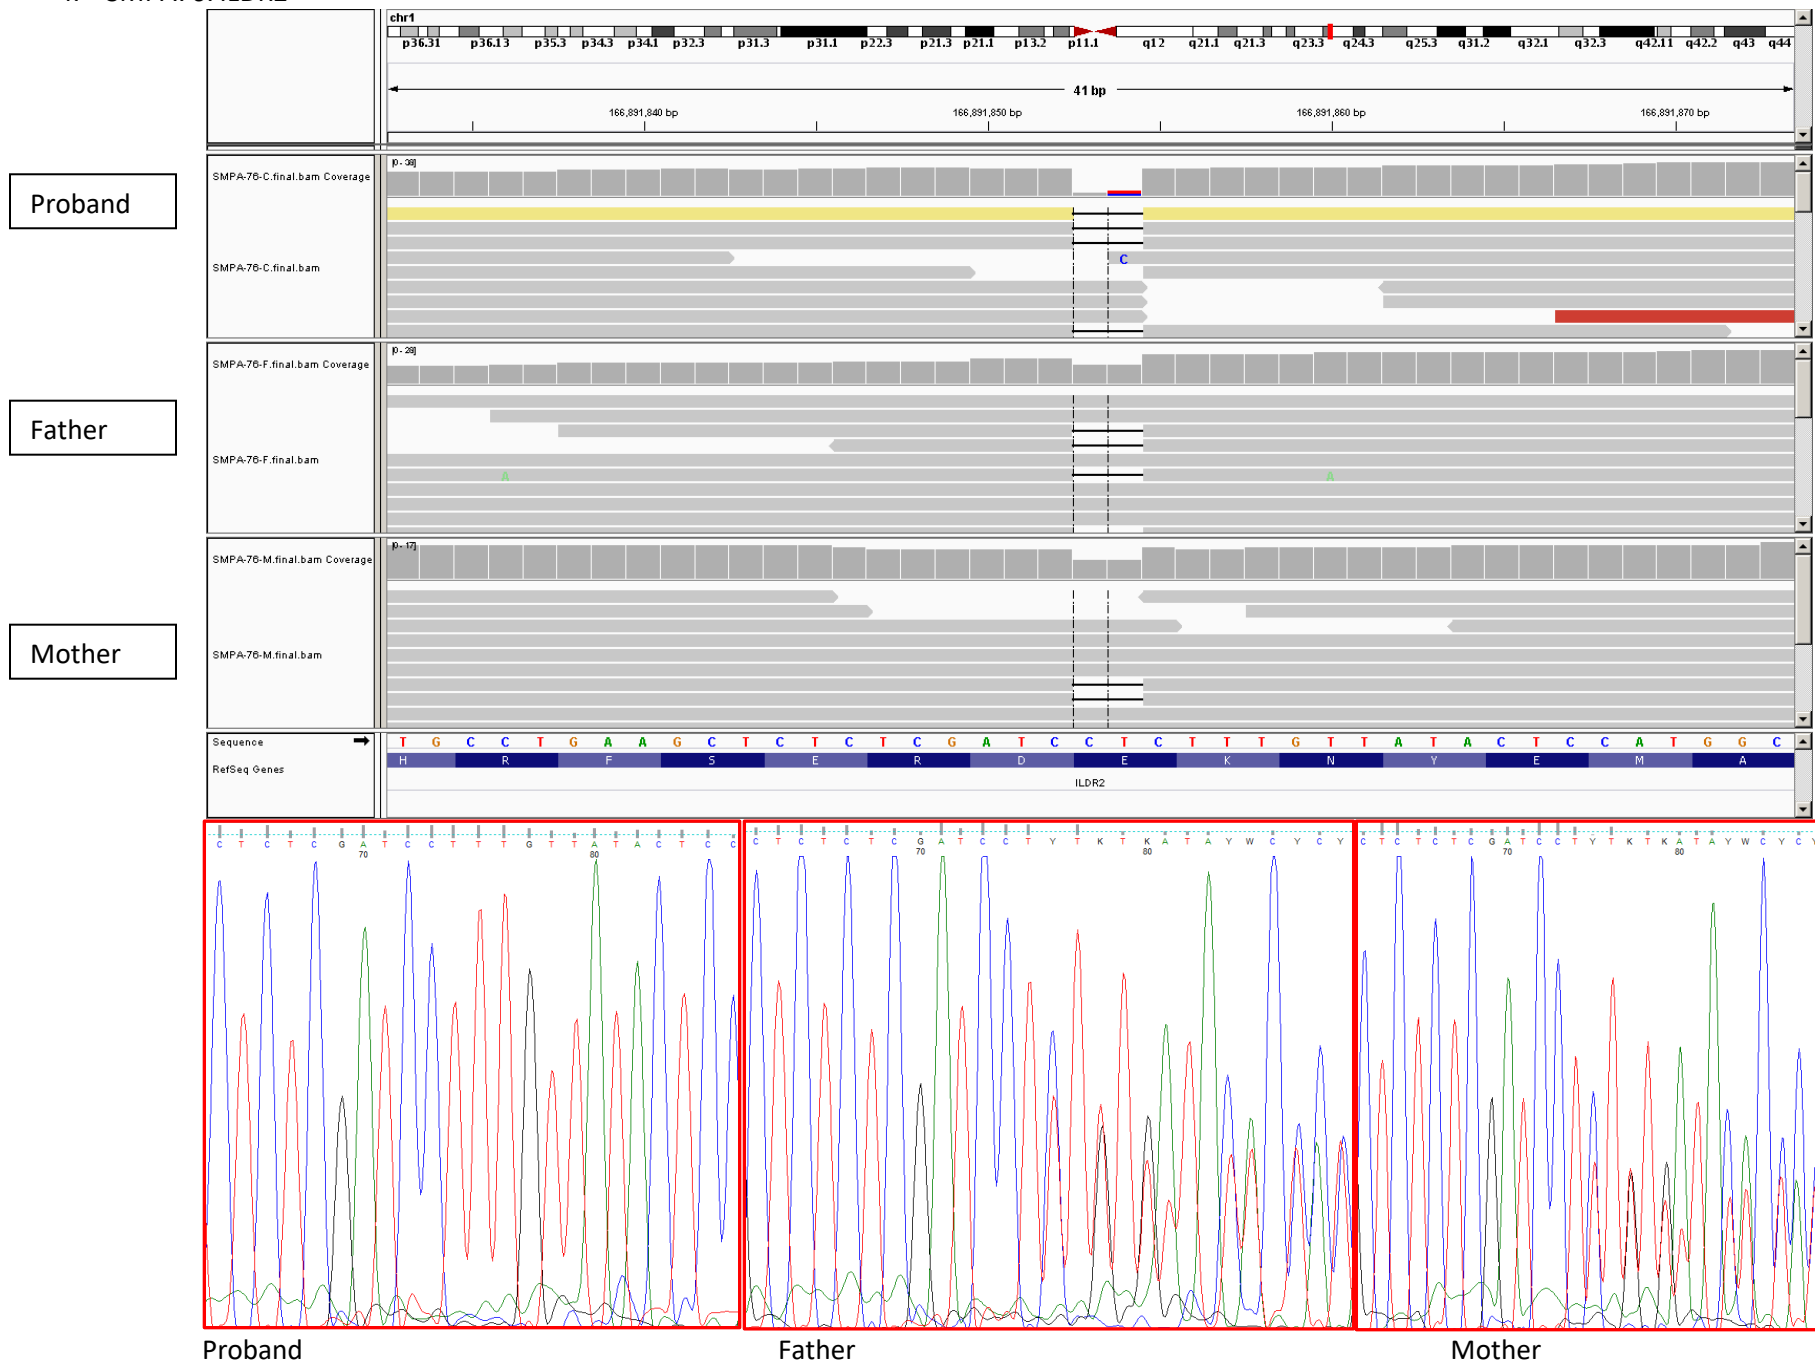

5. SMPA3: RASAL2

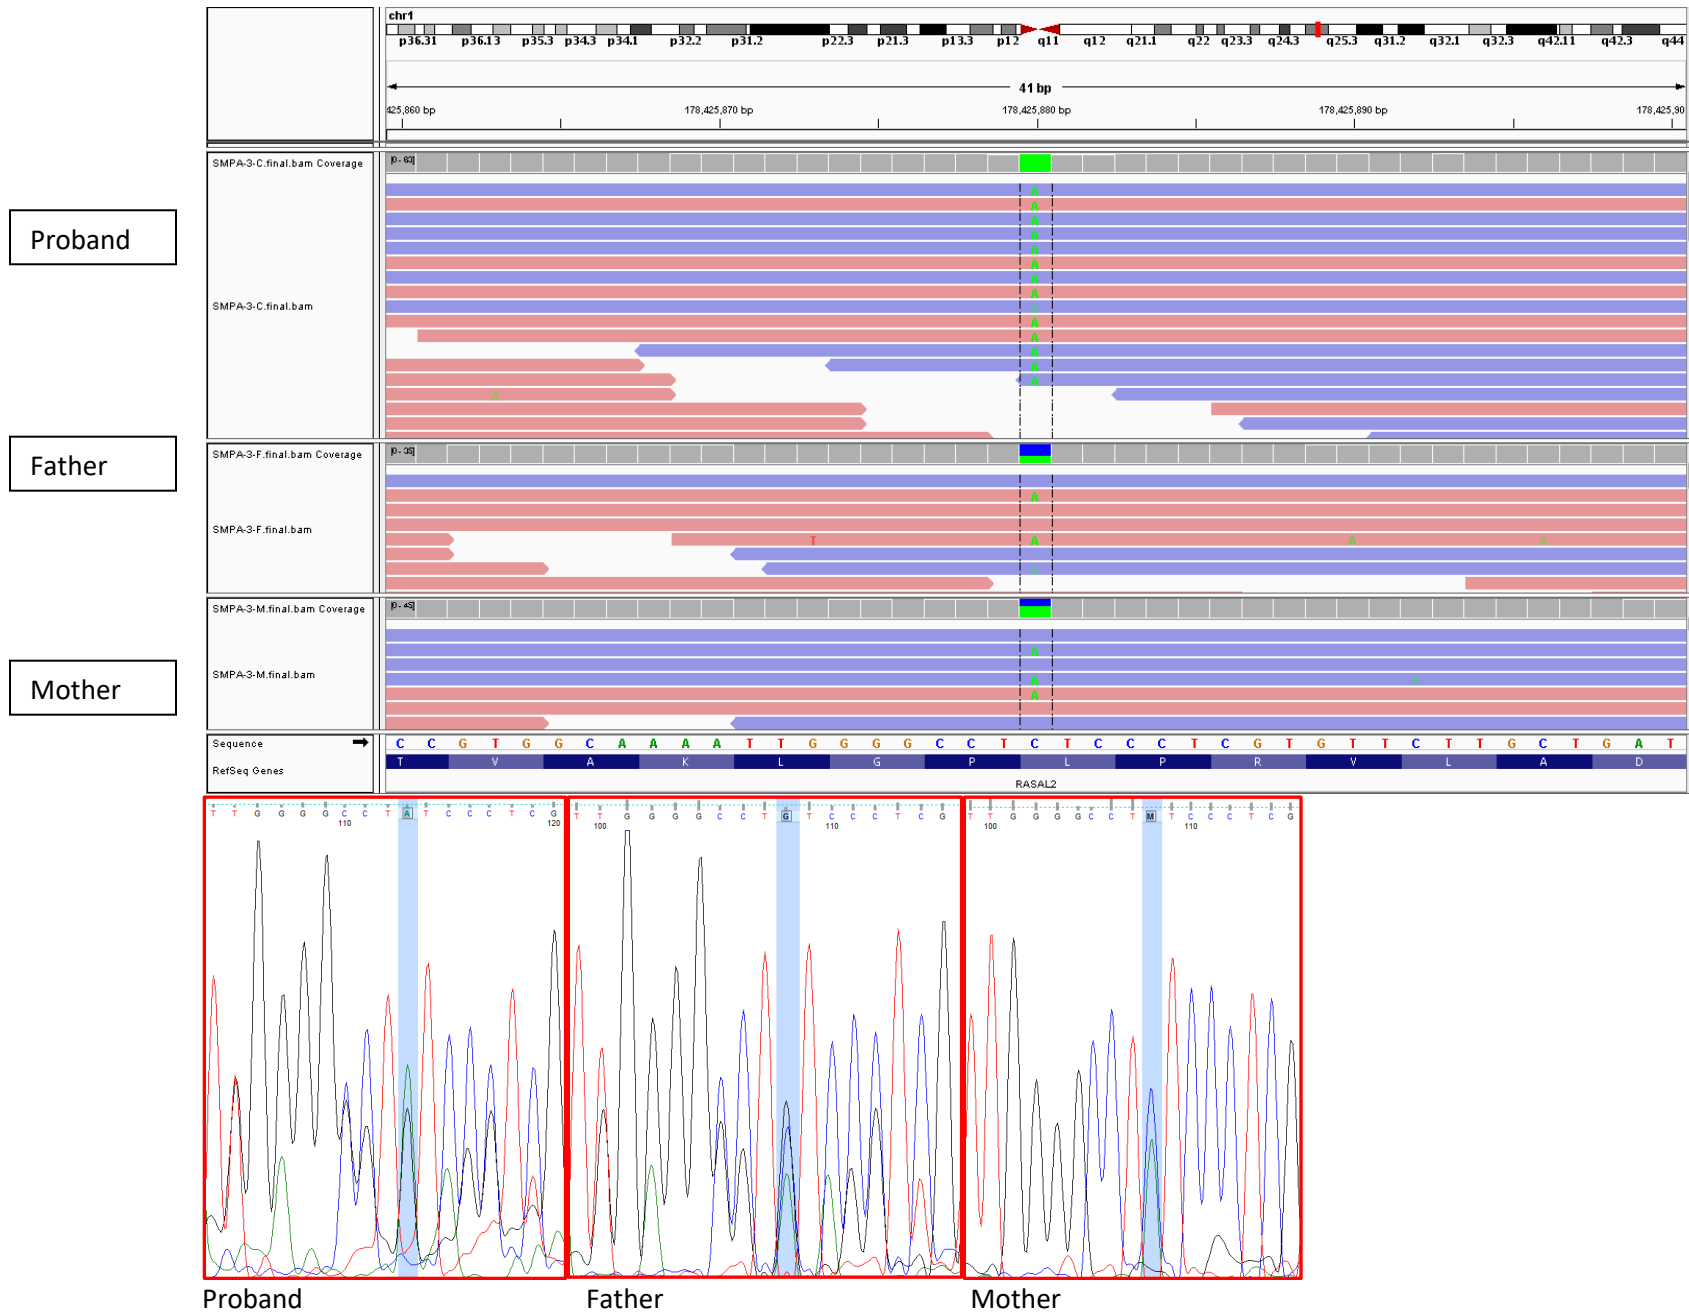

6. SMPA4: *DENND1B*

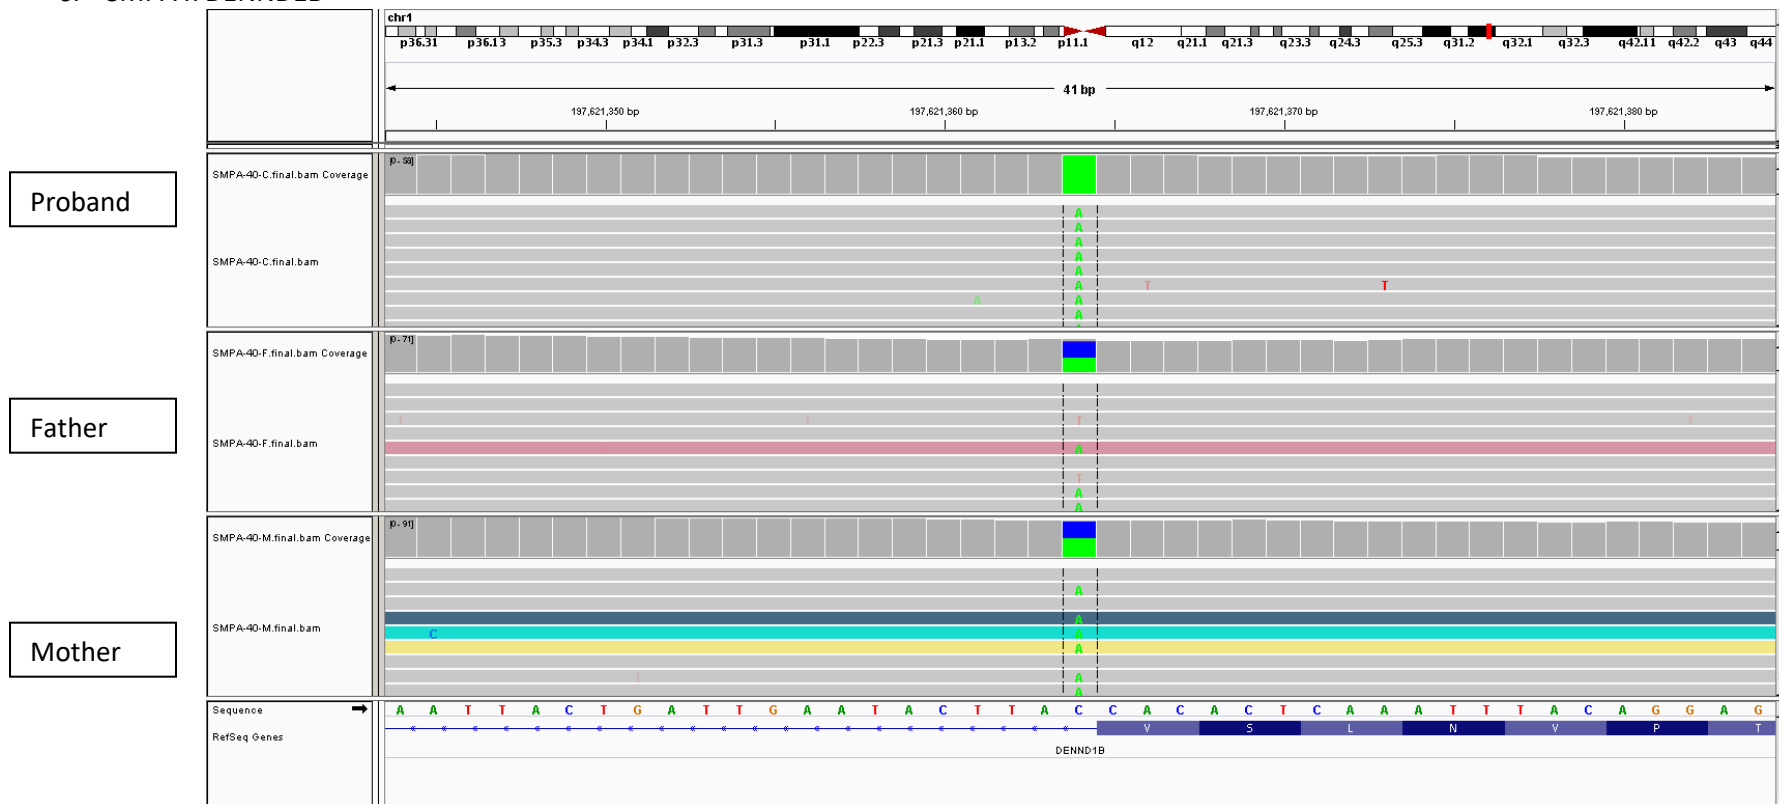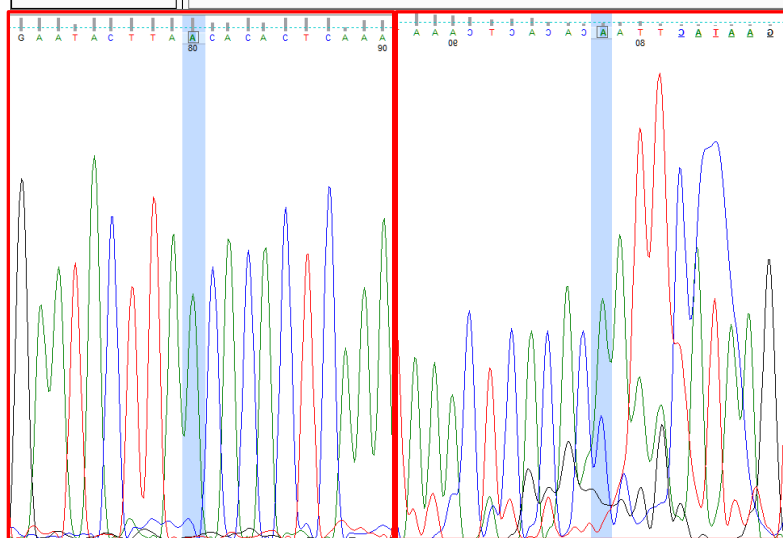

Proband

Father

7. Autism8: *HTRA2*

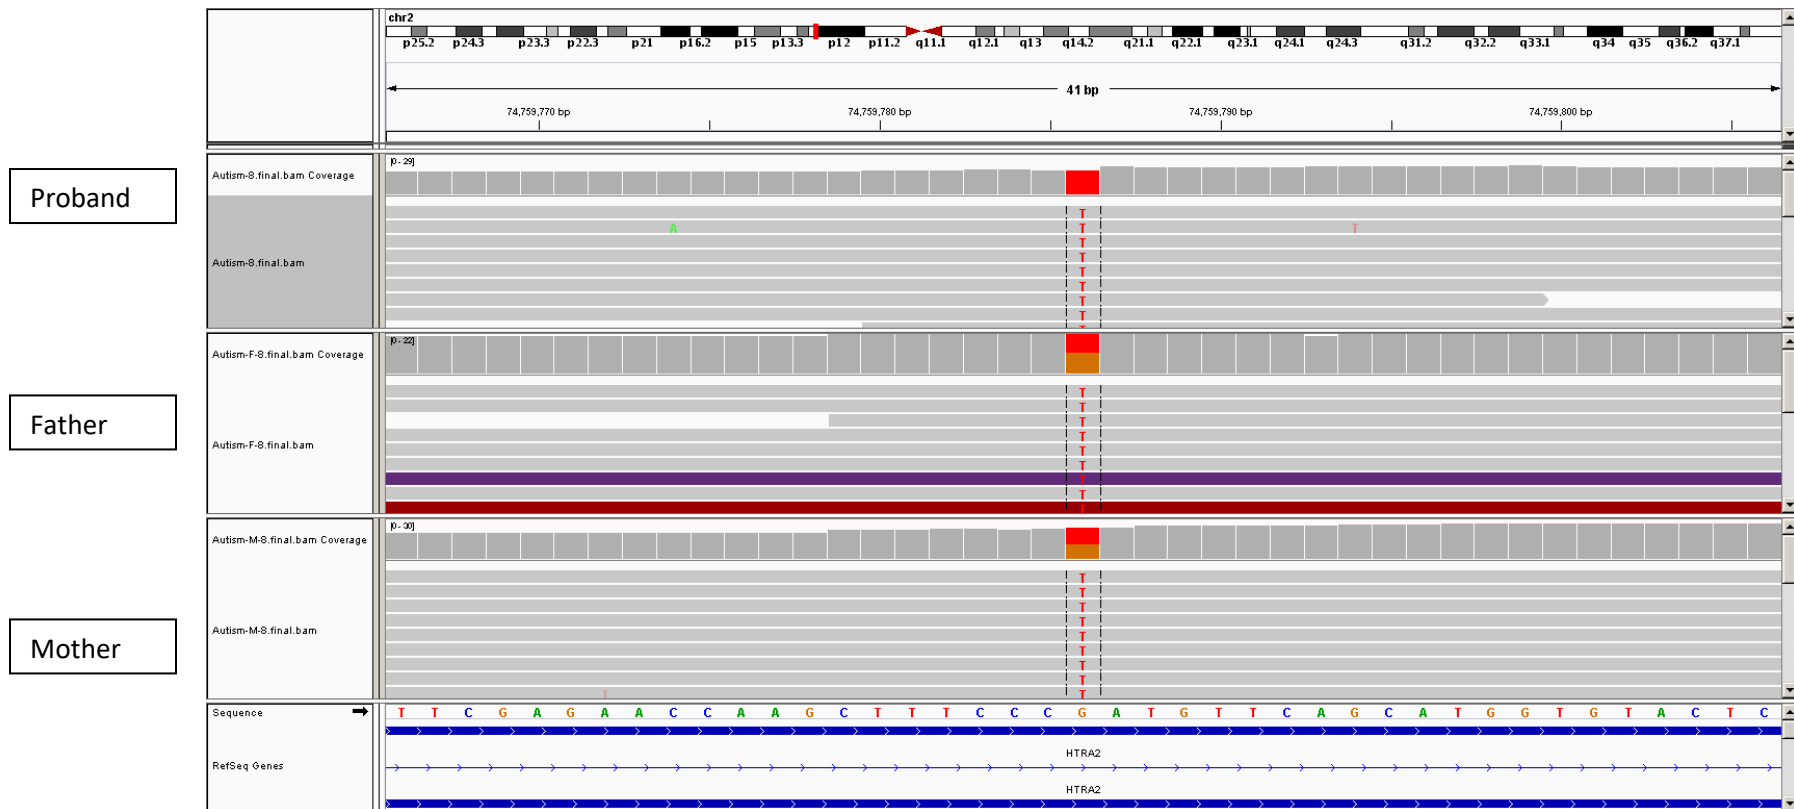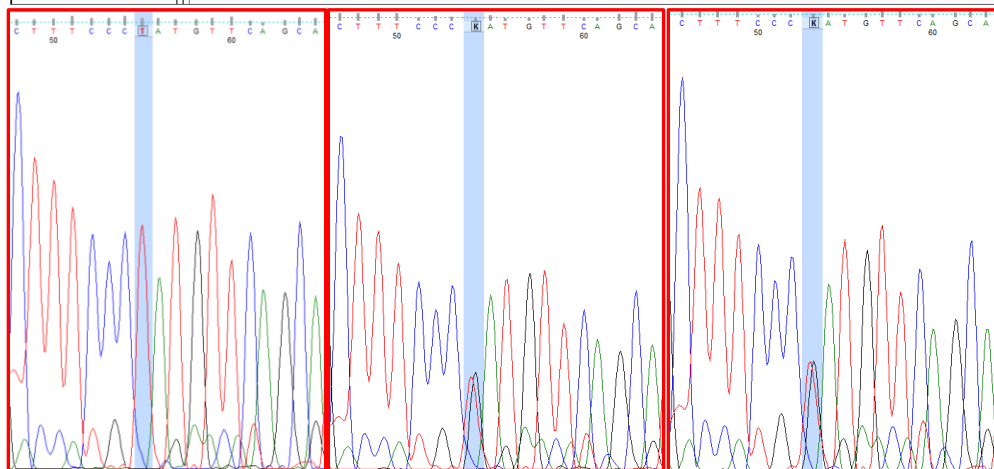

Proband

Father

Mother

## 8. SMPA19: SCN10A

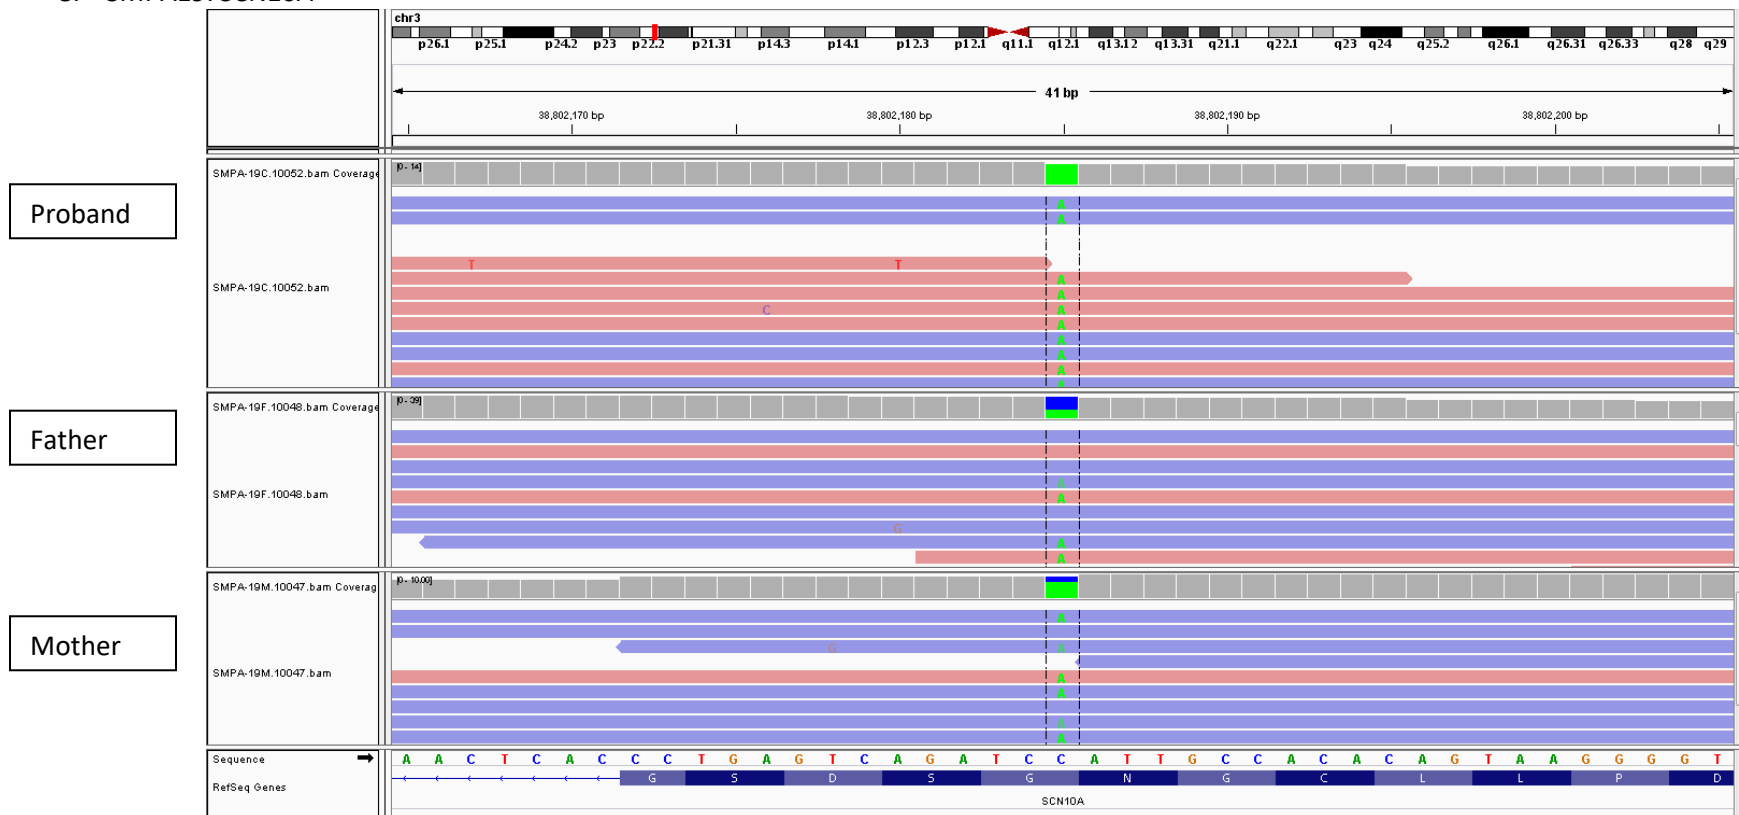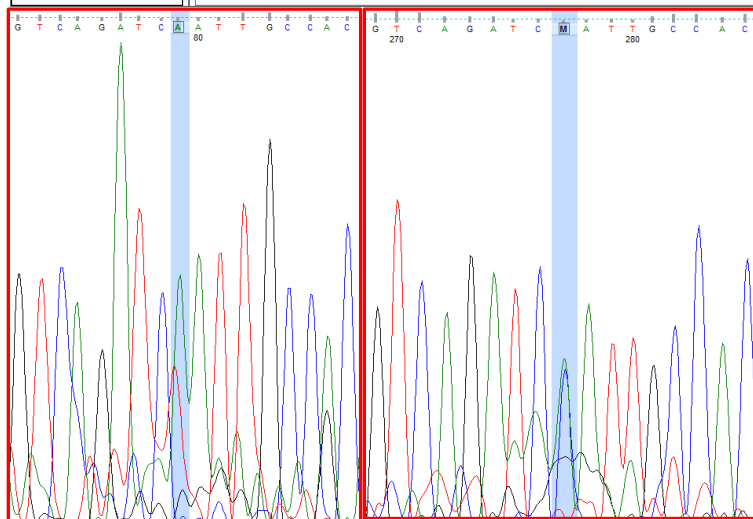

Proband

Mother



9. SMPA76: ANO10

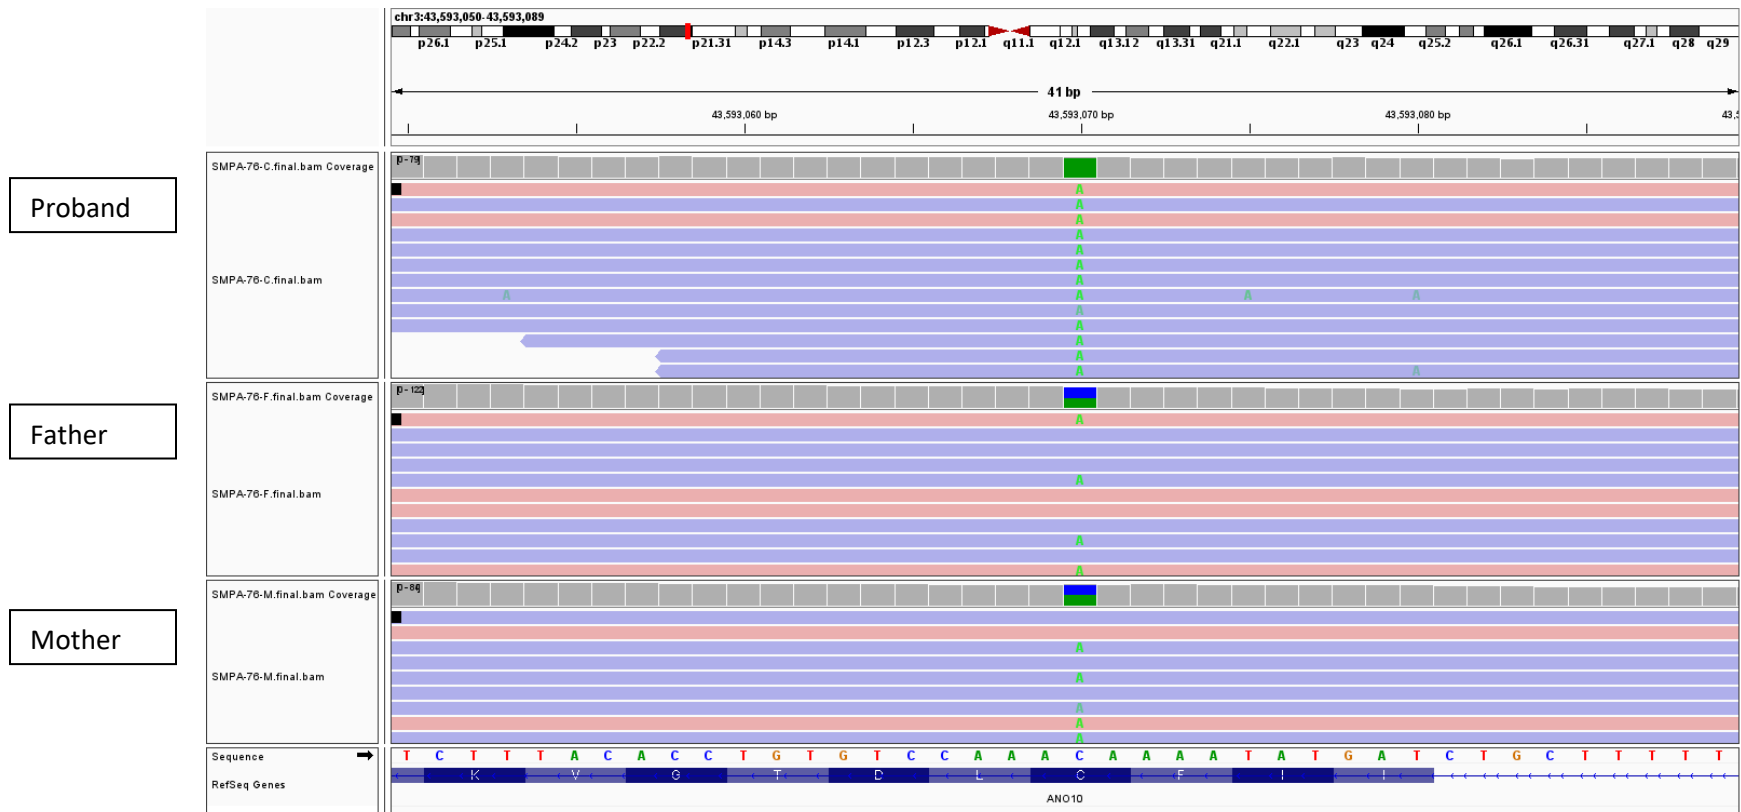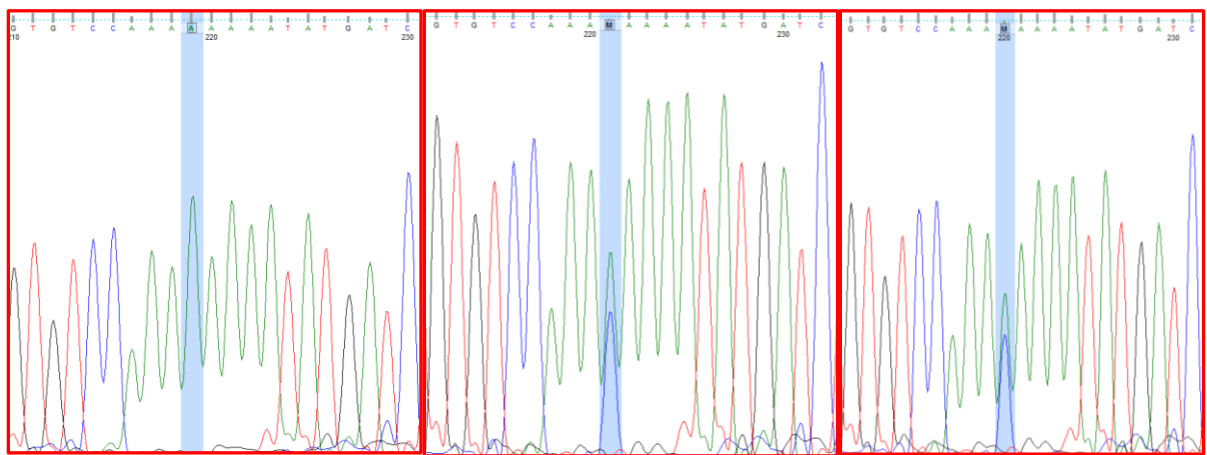

Proband

Father

Mother

10. SA15: SETD2

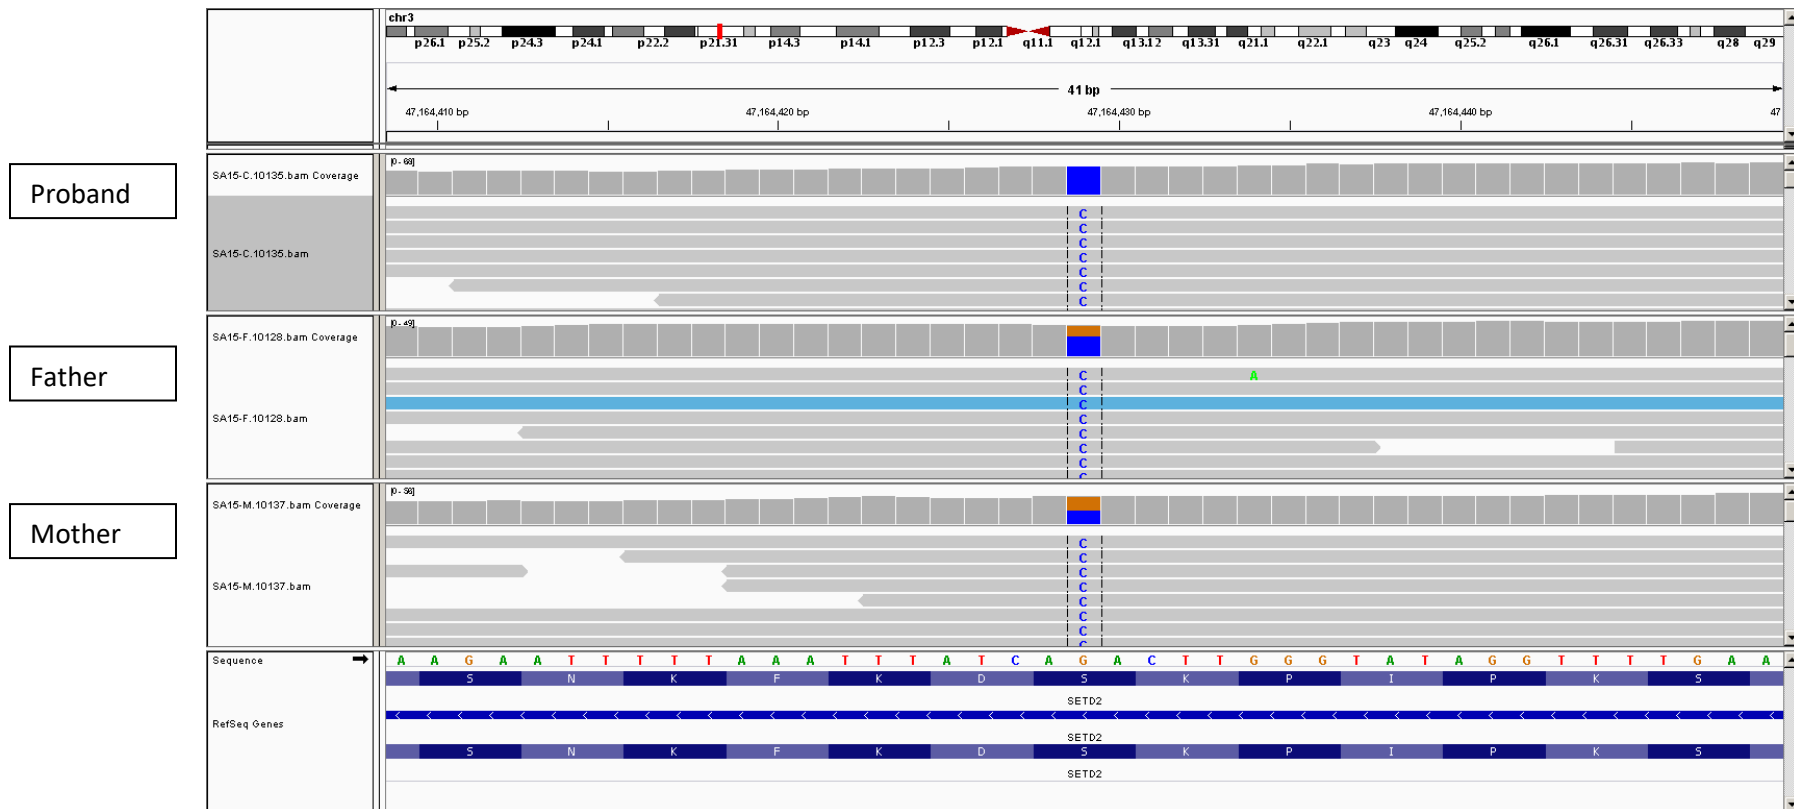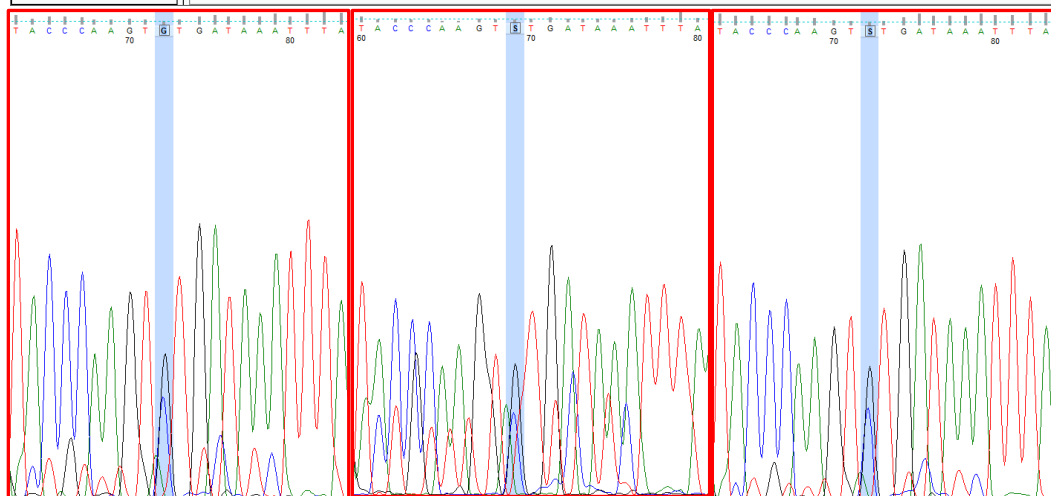

11. SMPA27: *EPHB1*

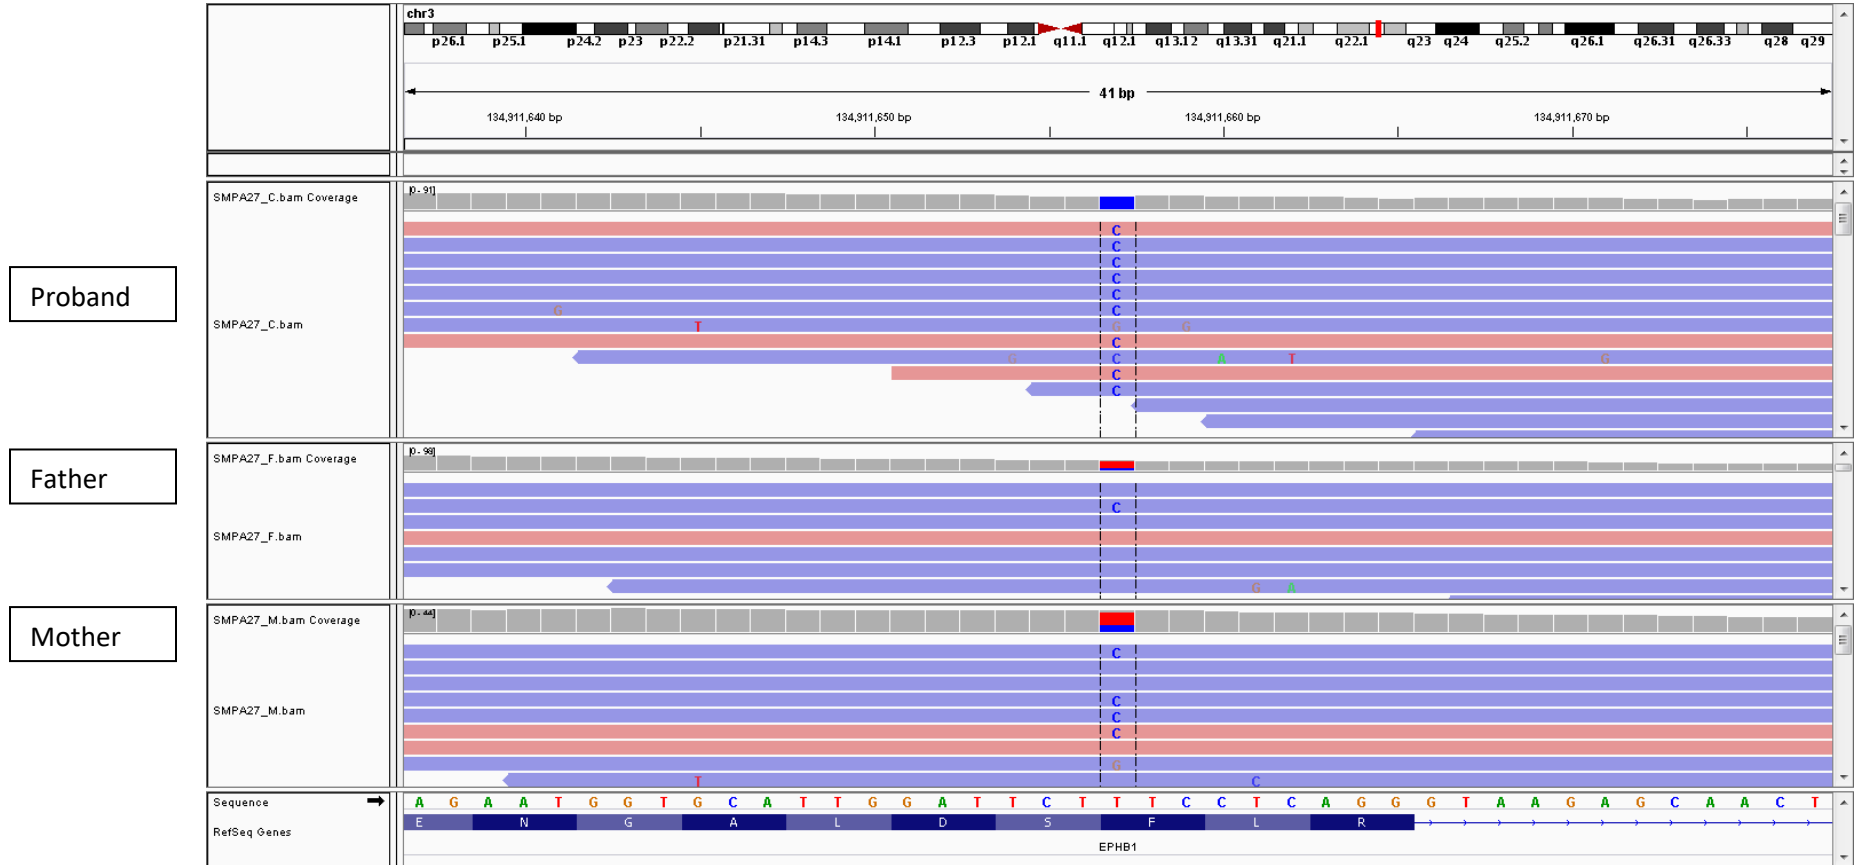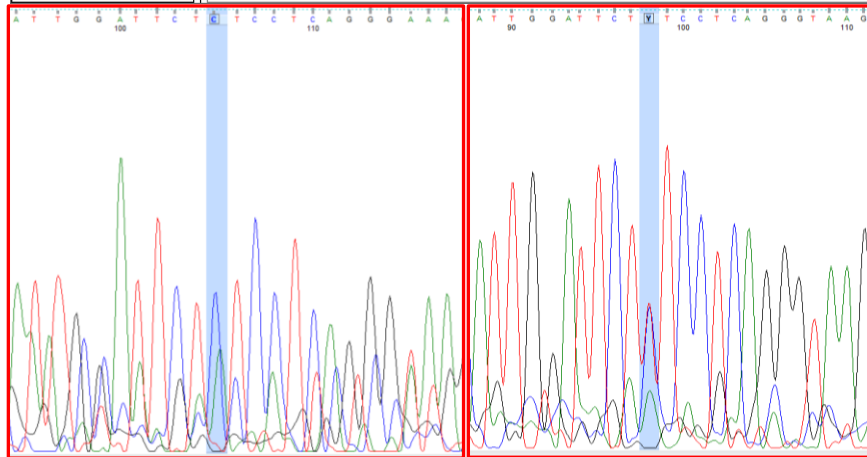

Proband

Mother

## 12. Autism3: *RSRC1*

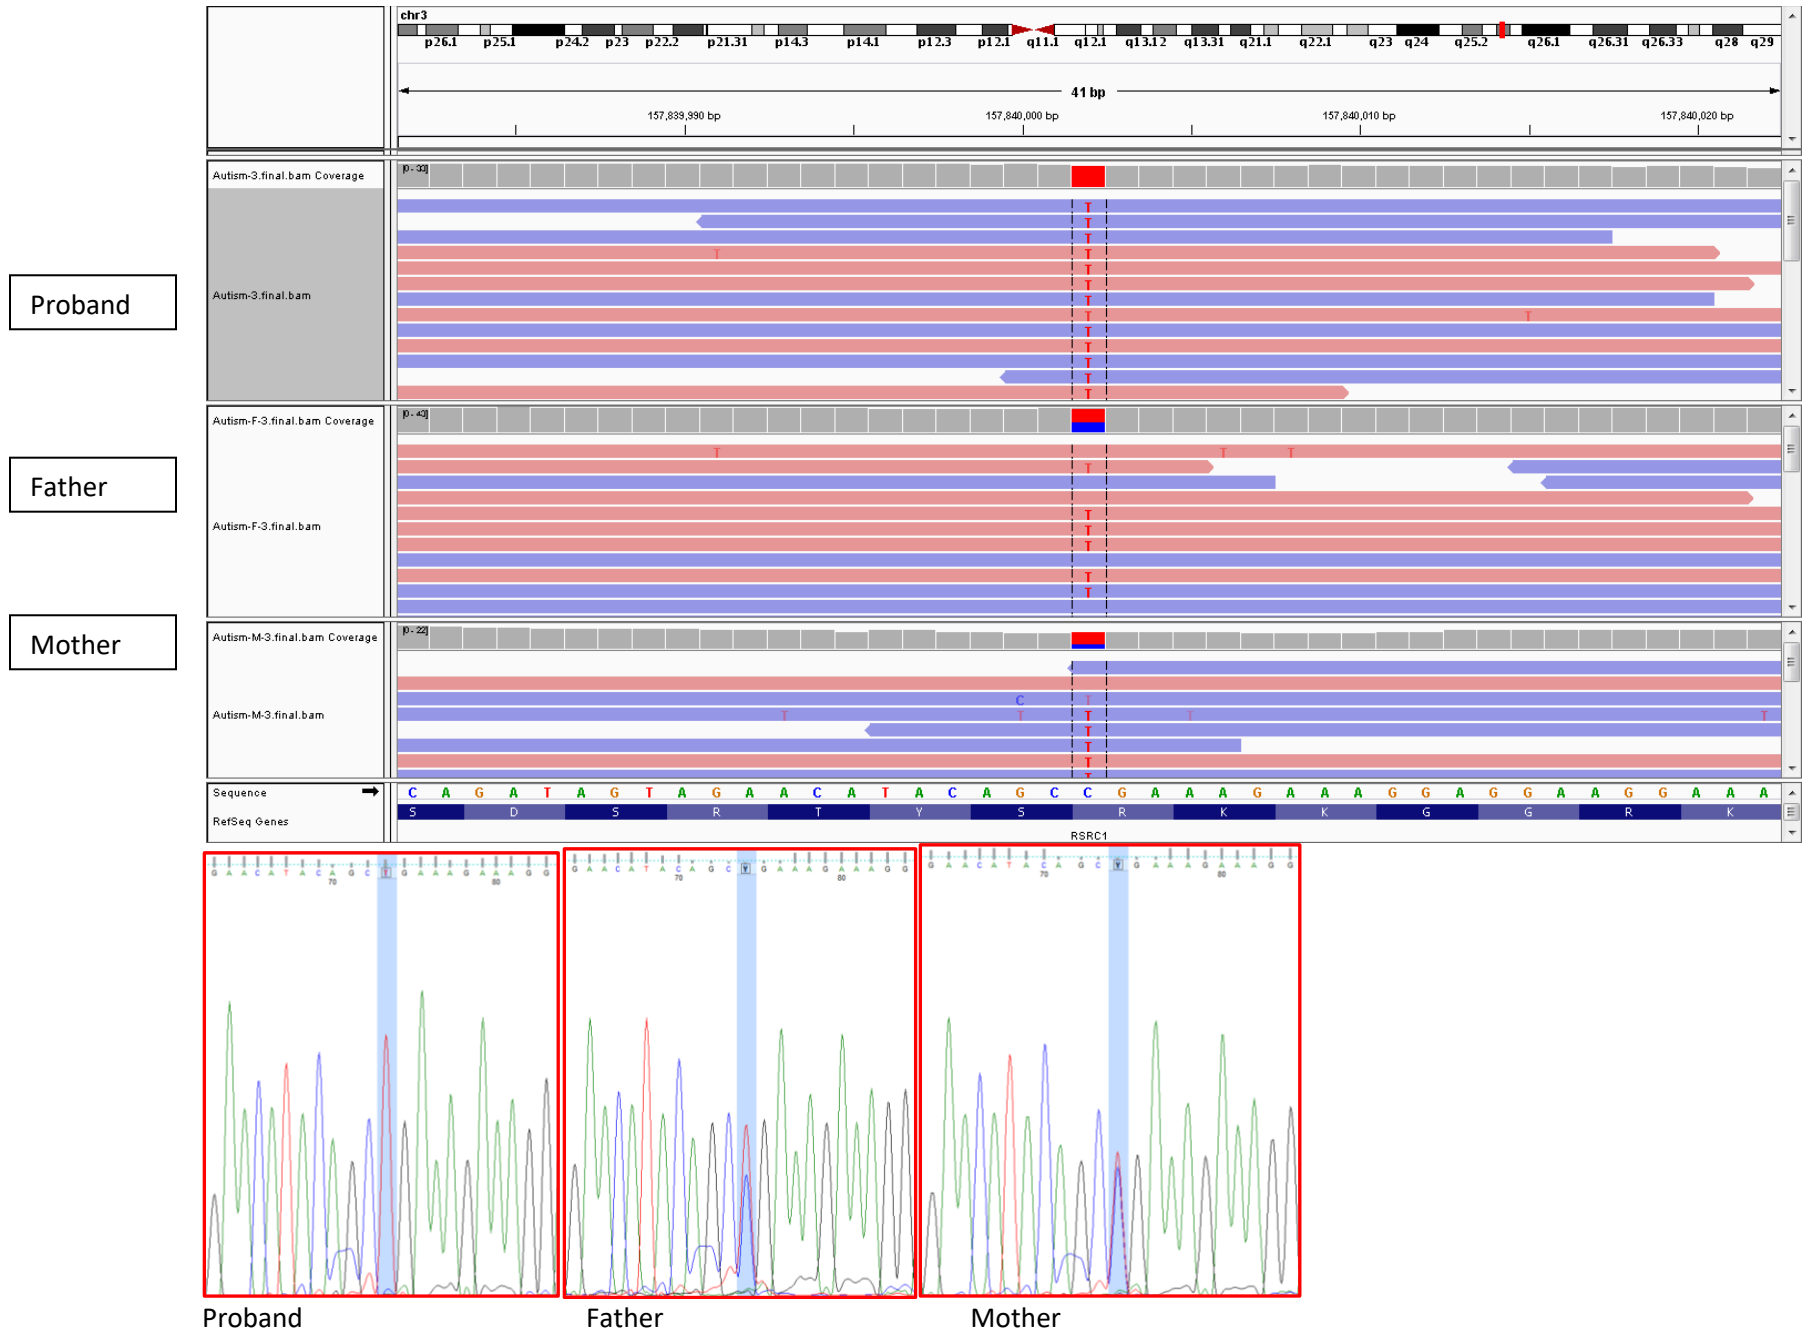

13. SMPA8: *LRR34*

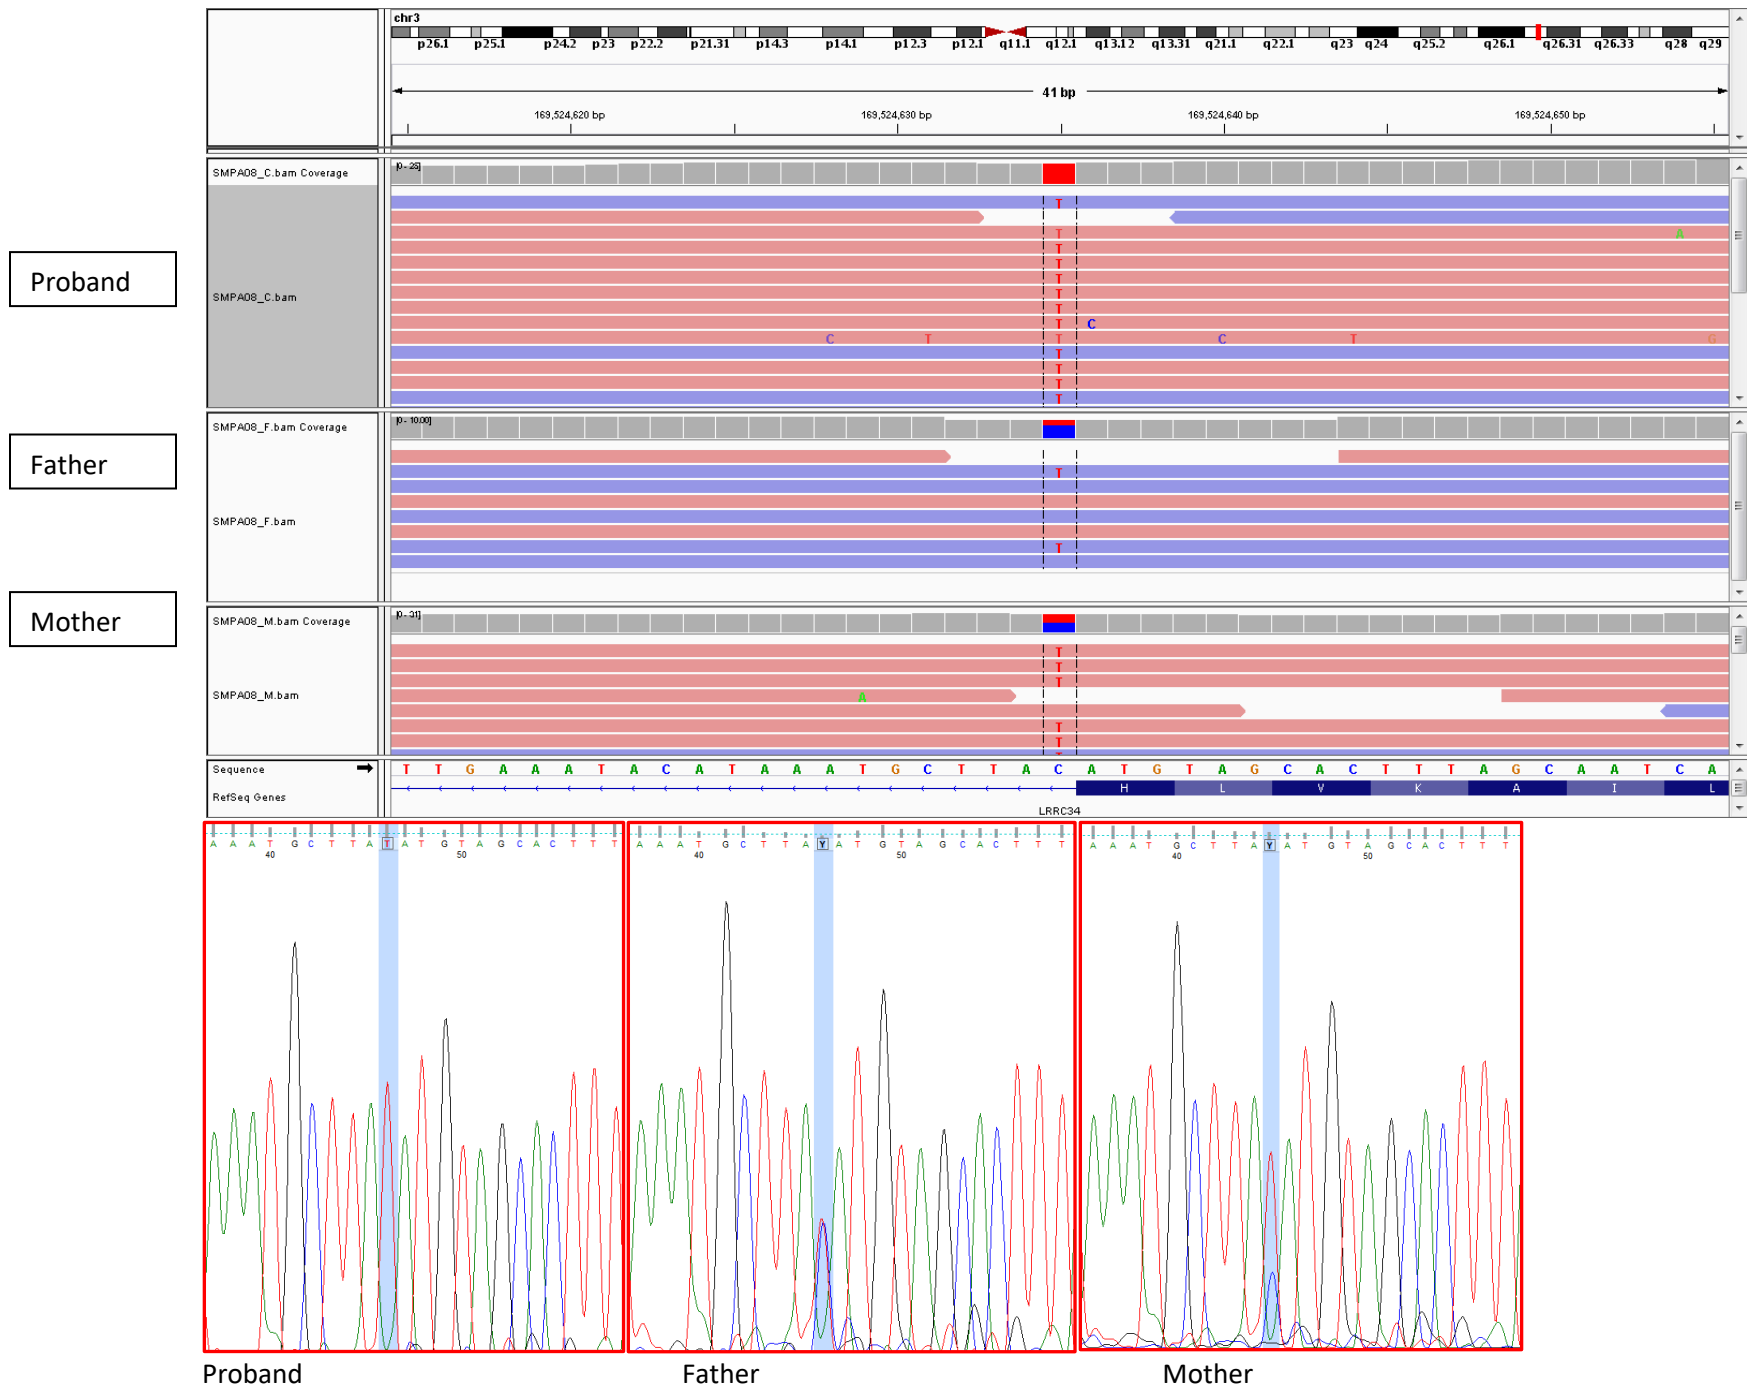

14. SMPA40: ENPEP

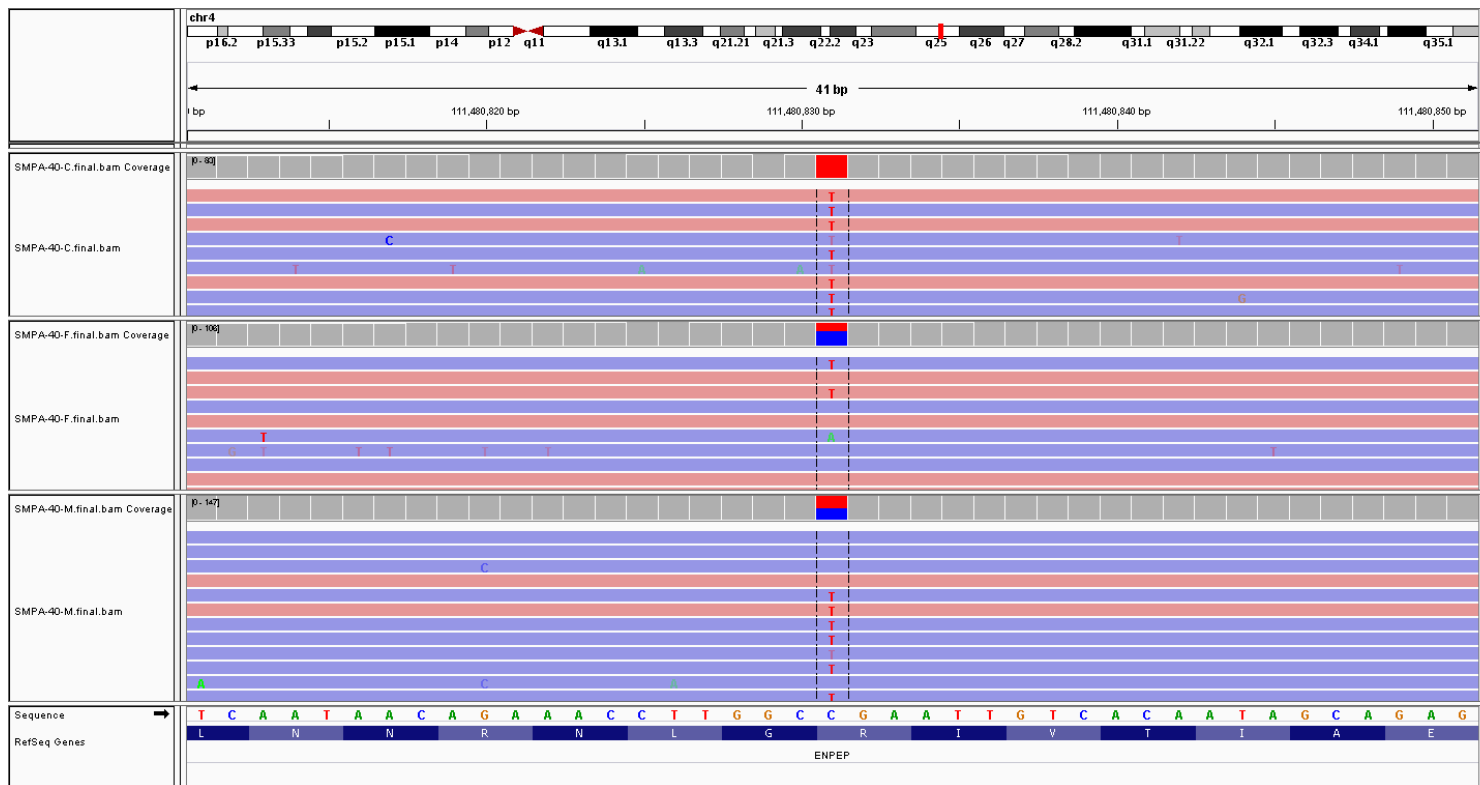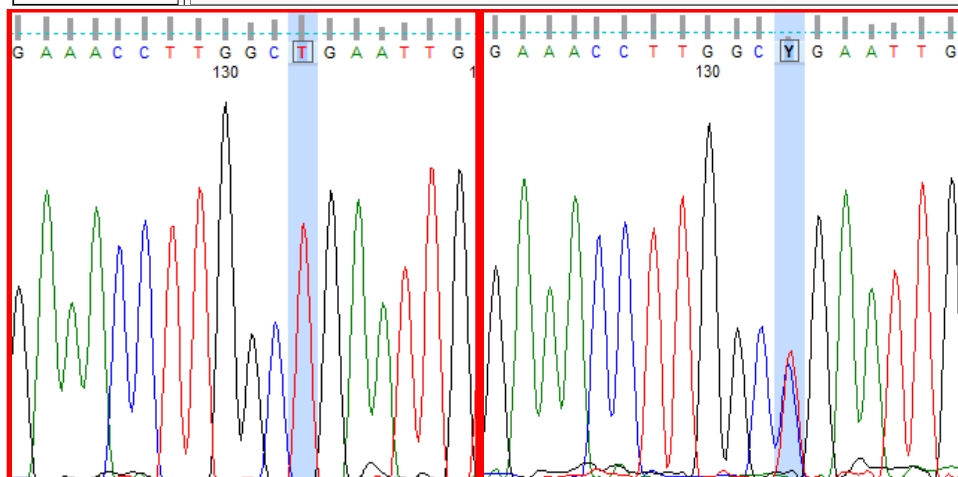

Proband

Father



16. SMPA35: ENPP6

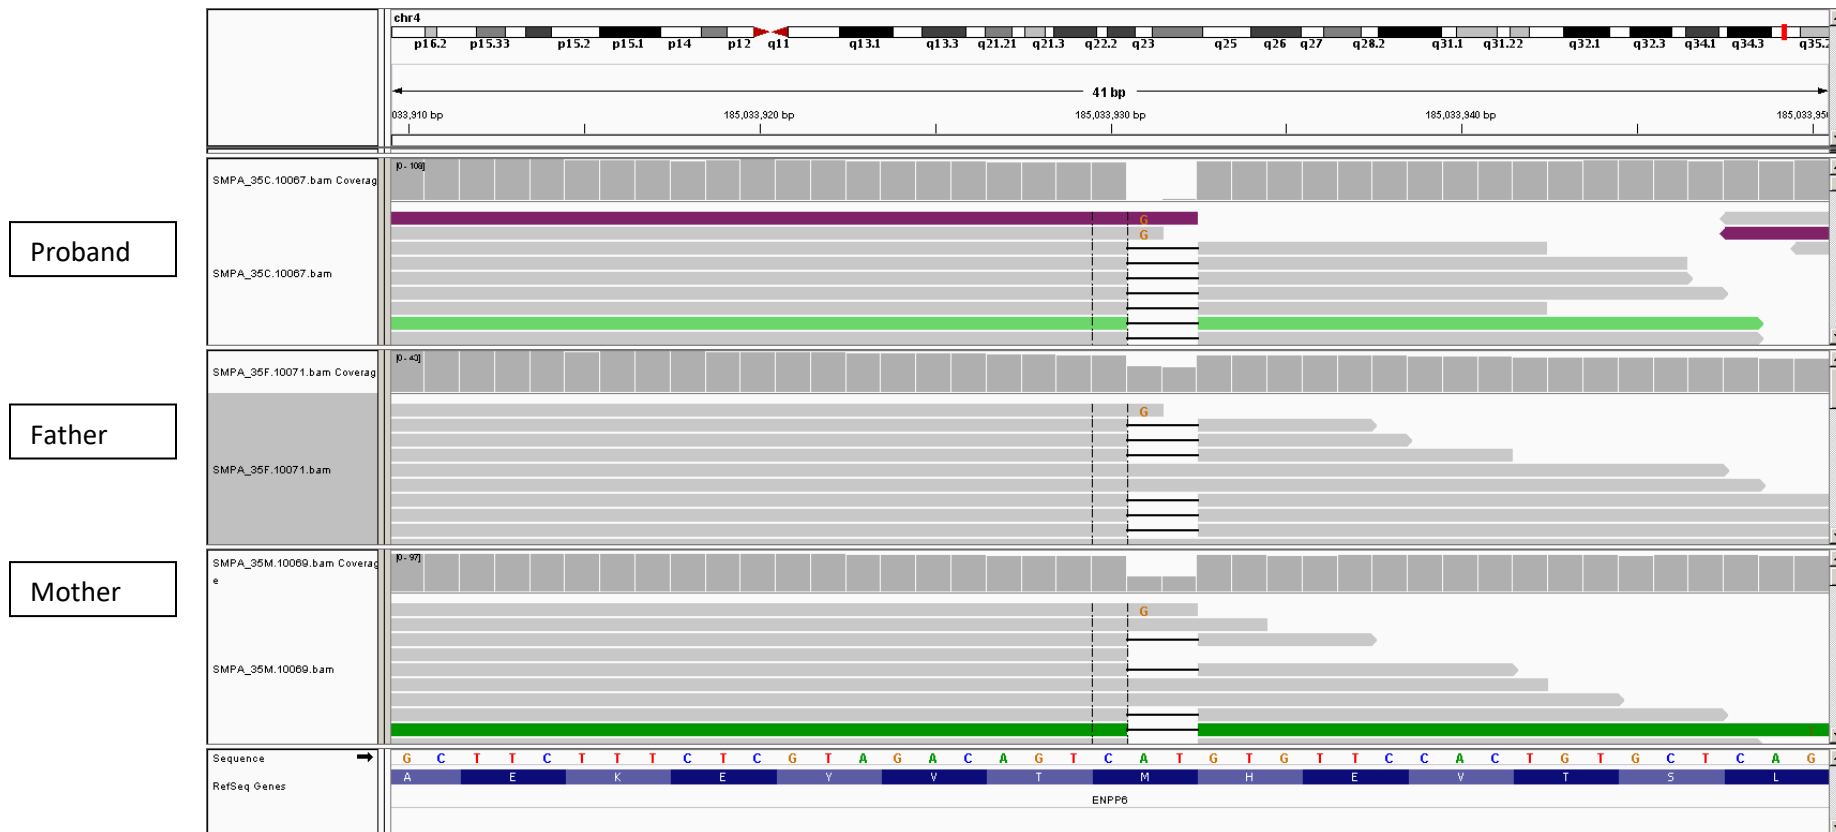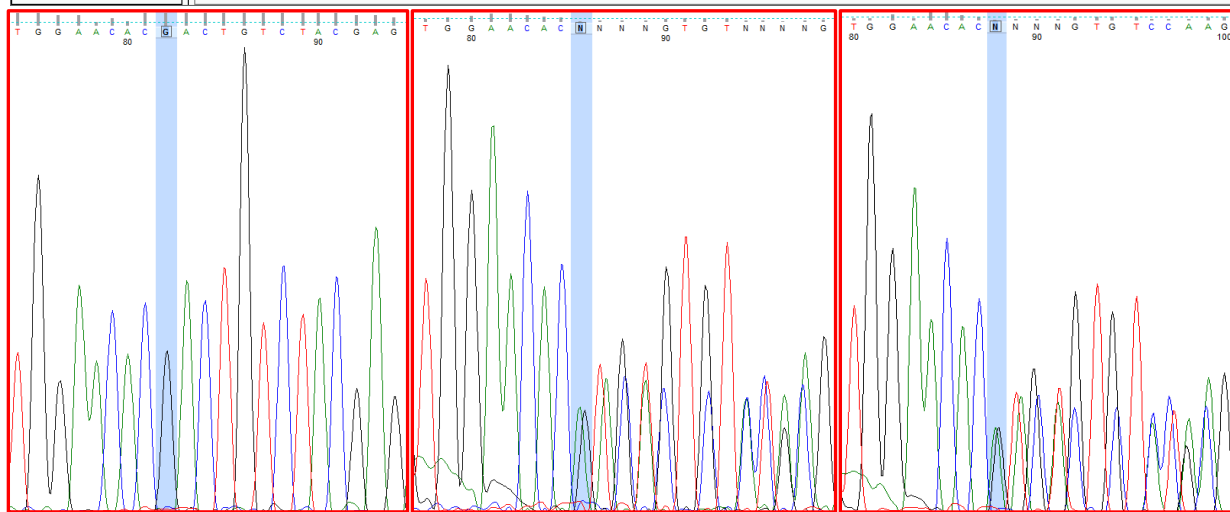

Proband

Father

Mother



17. IABB1: CAPSL

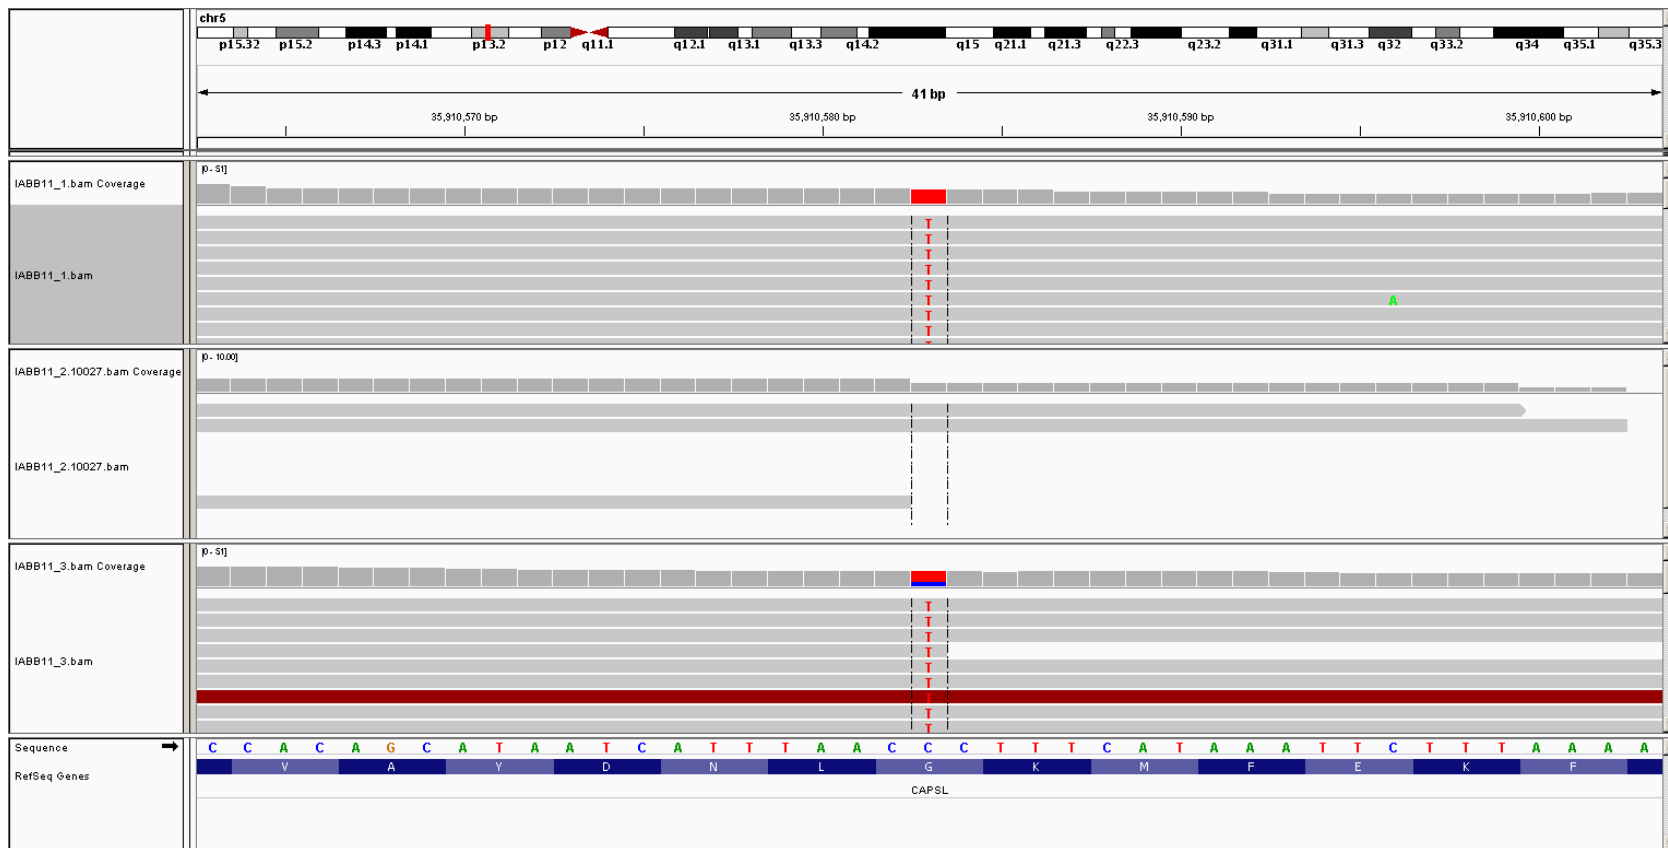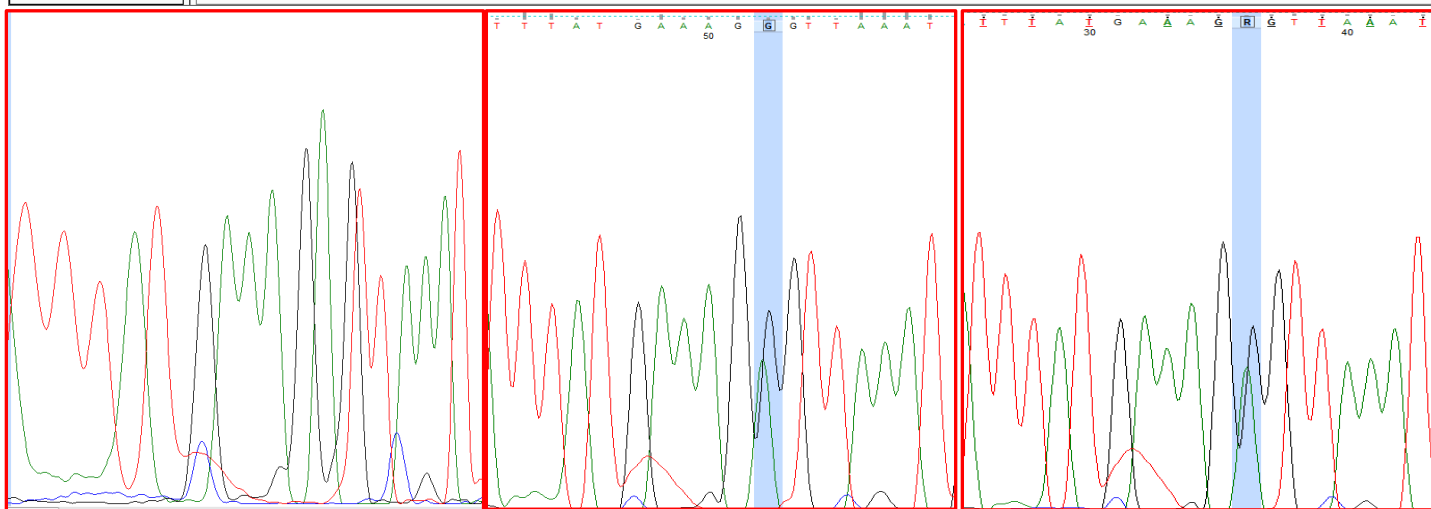

Proband

Father

Mother

18. Autism8: *SLC36A1*

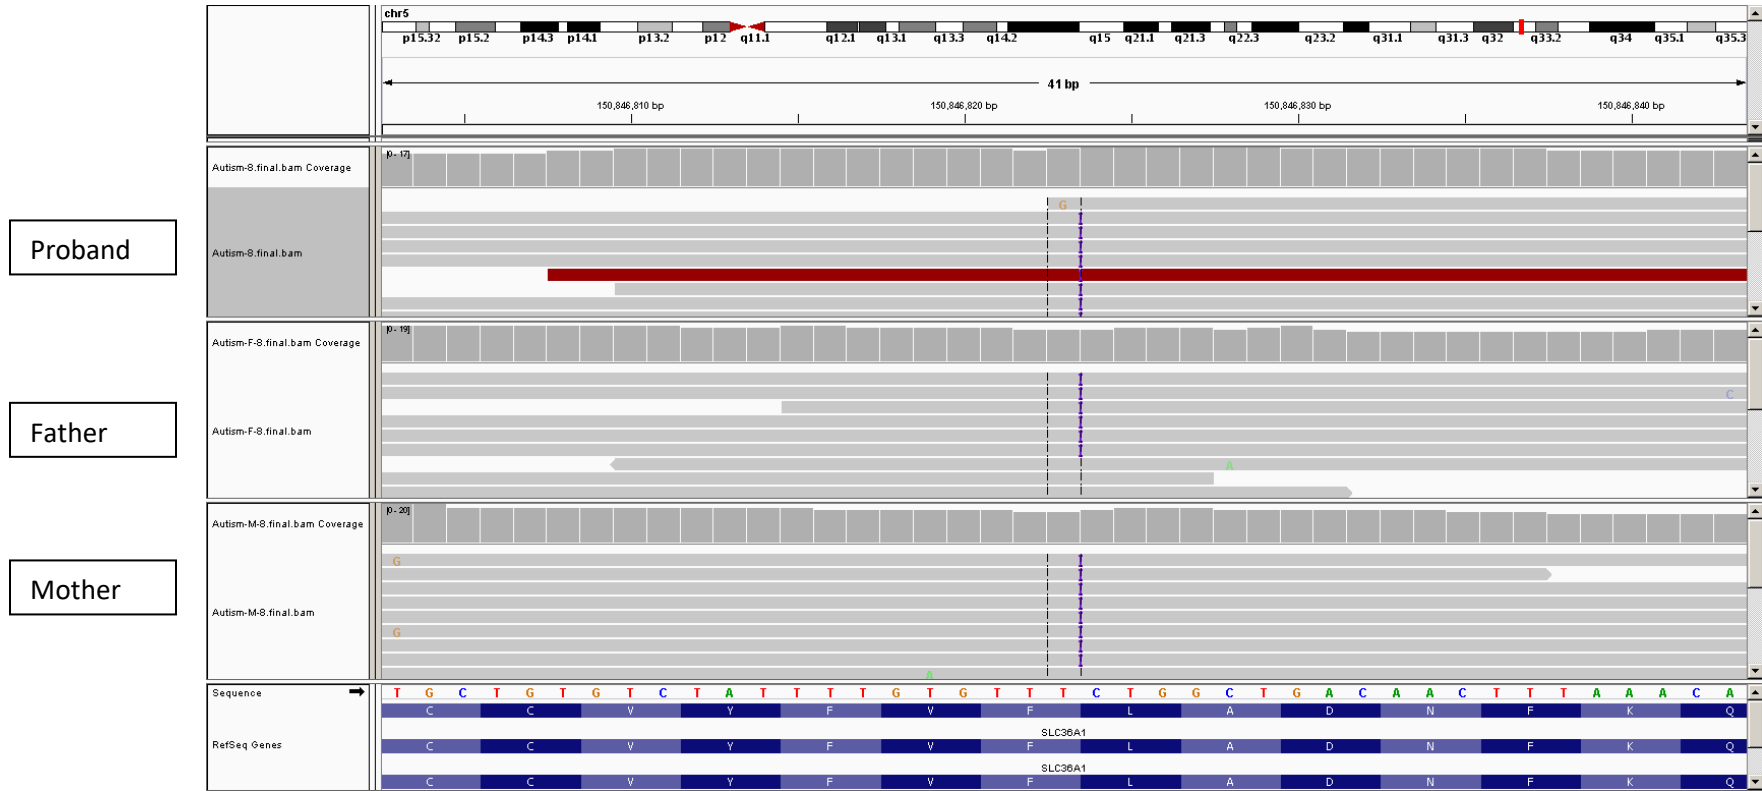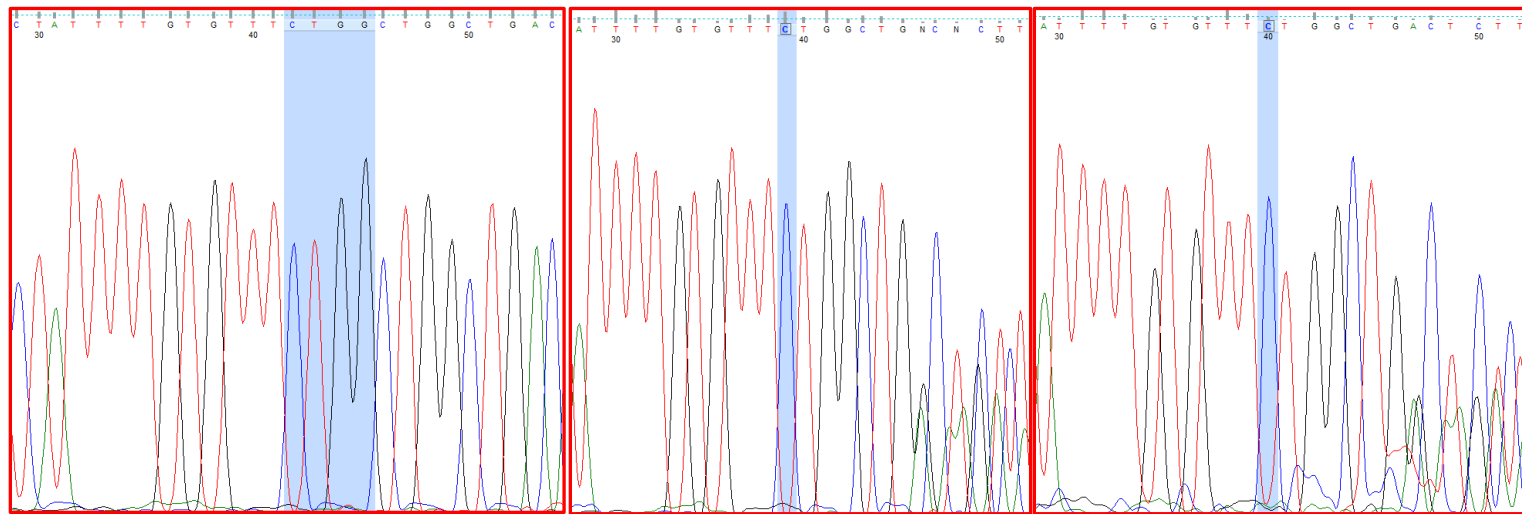

Proband

Father

Mother

19. IAU56: FAXDC2

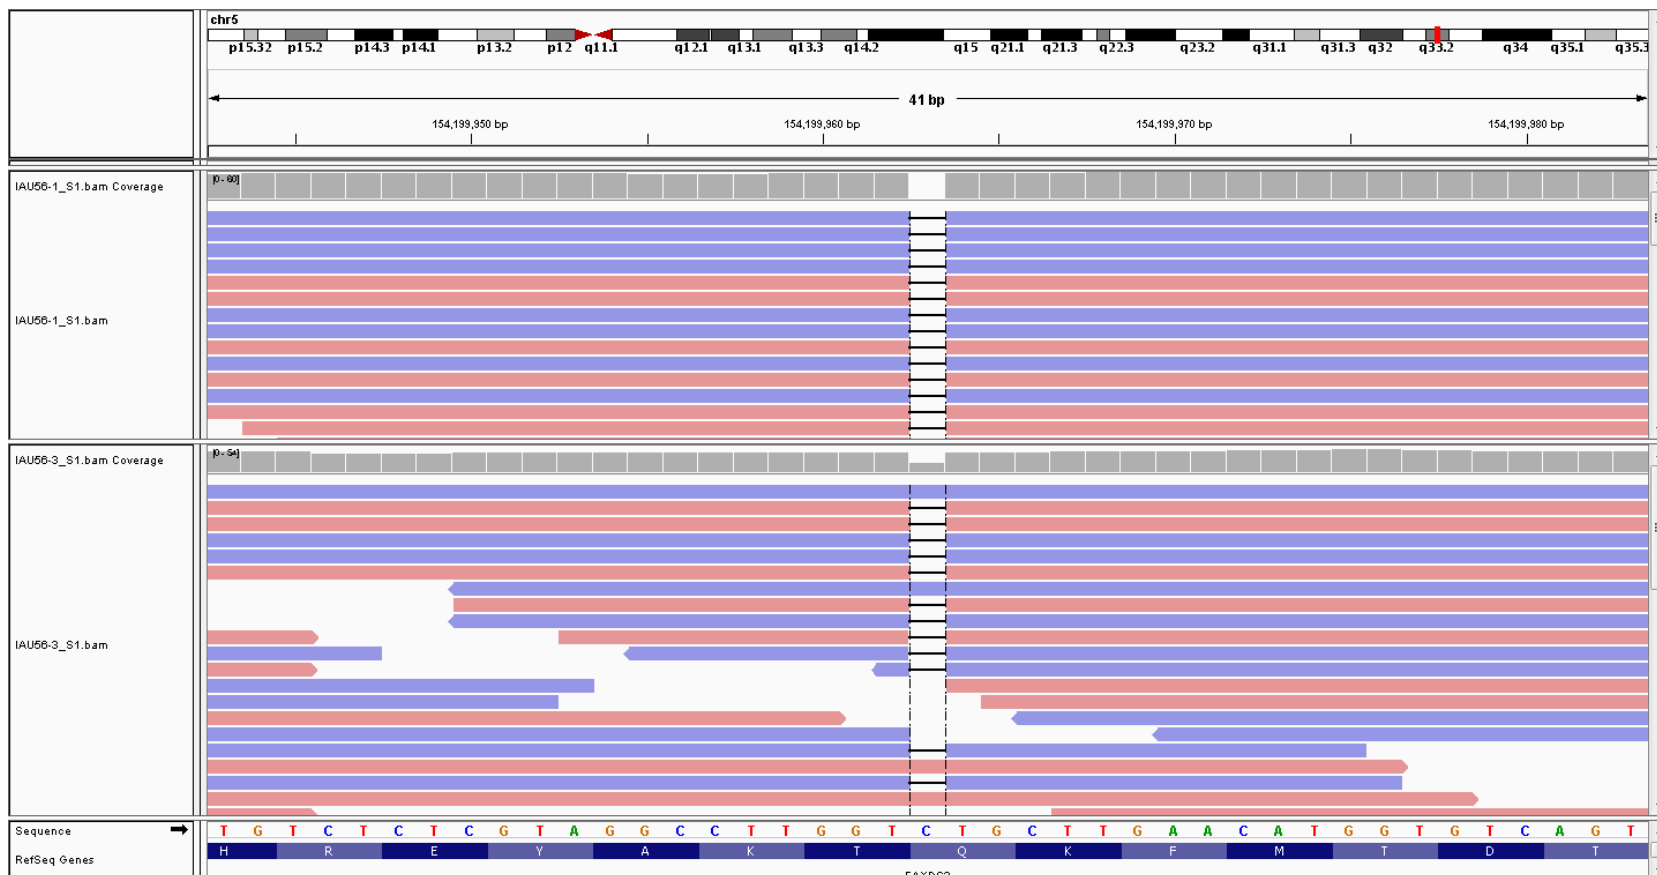

Proband

Mother

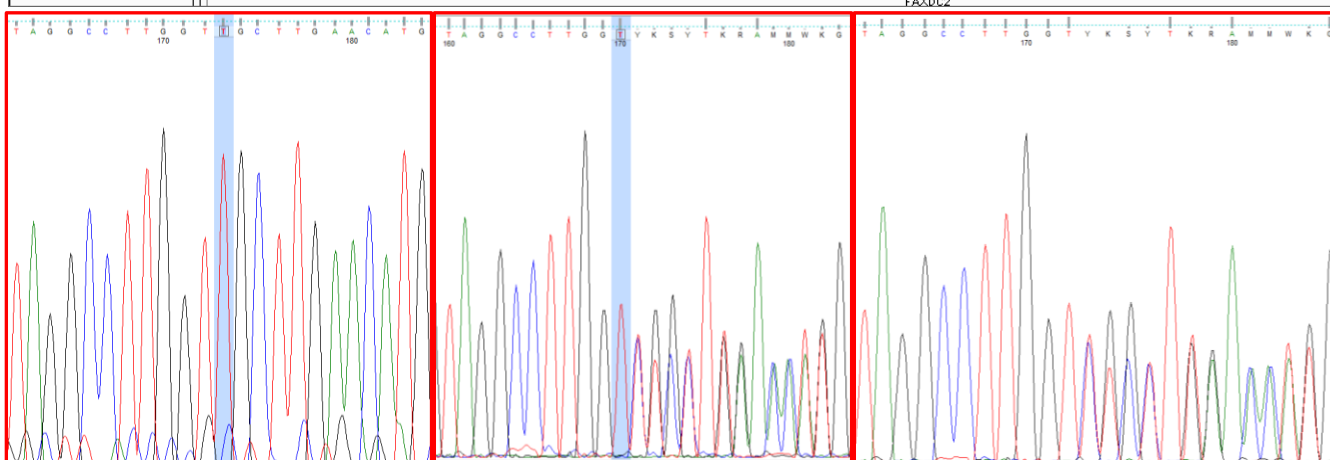

Proband

Father

Mother

20. SMPA48: RANBP9

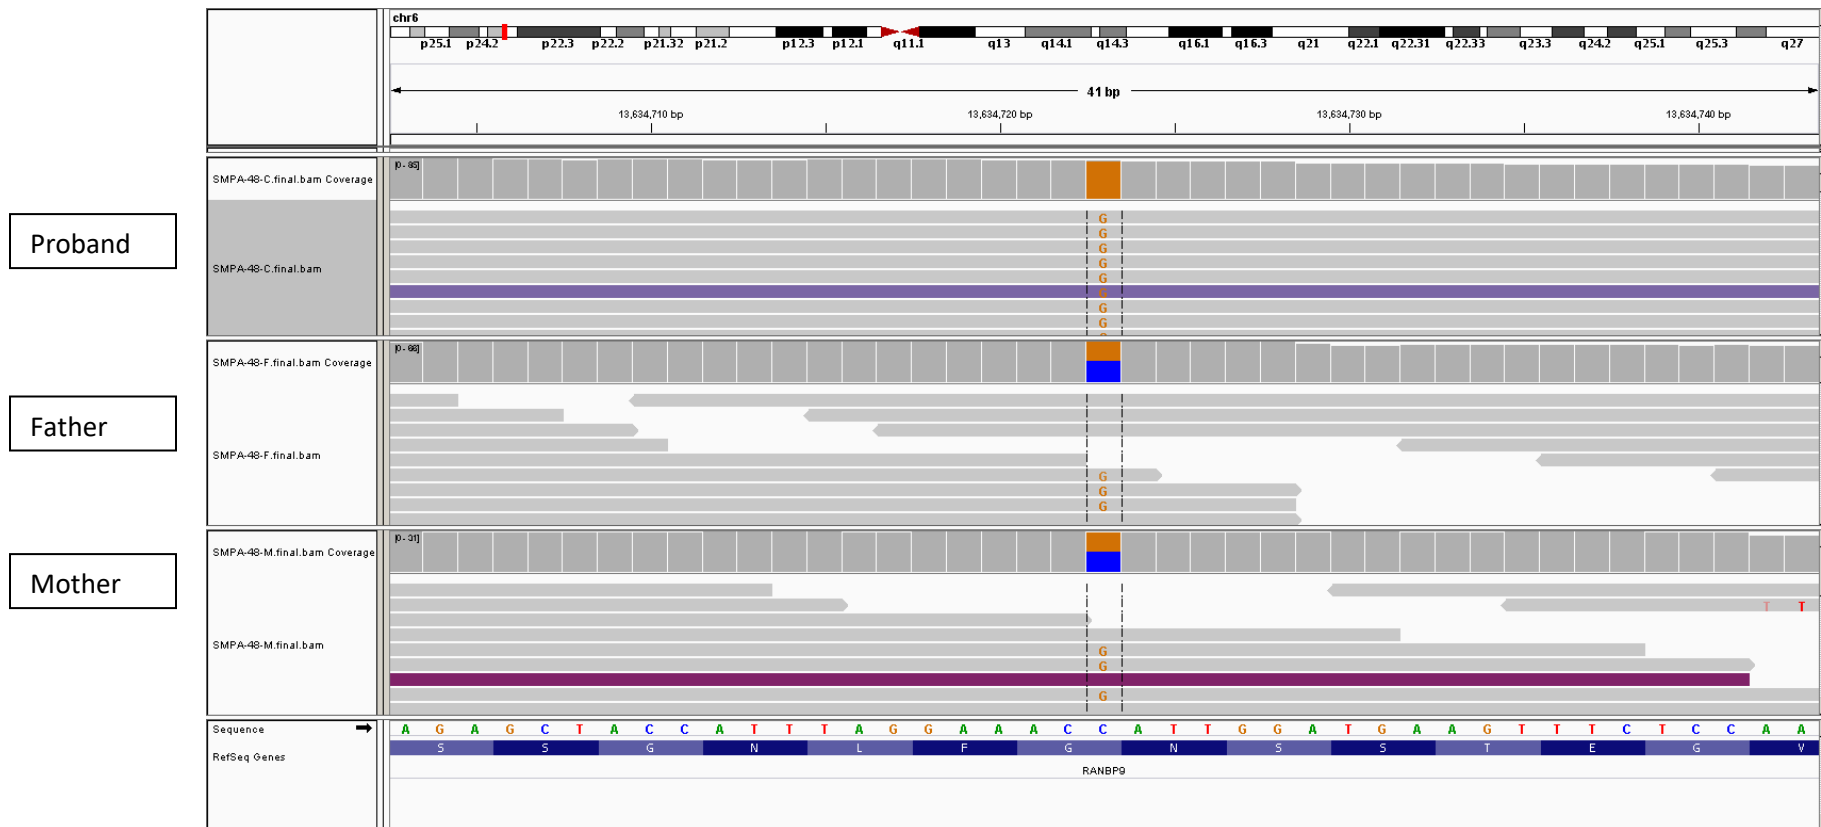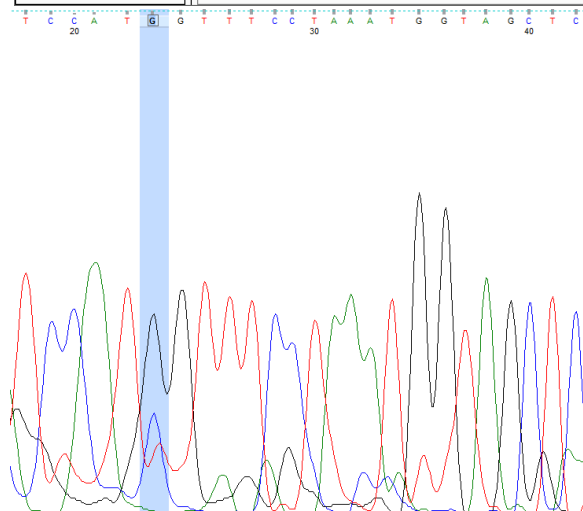

Mother (Father and proband DNA exhausted)

21. IABB8: *DNAH8*

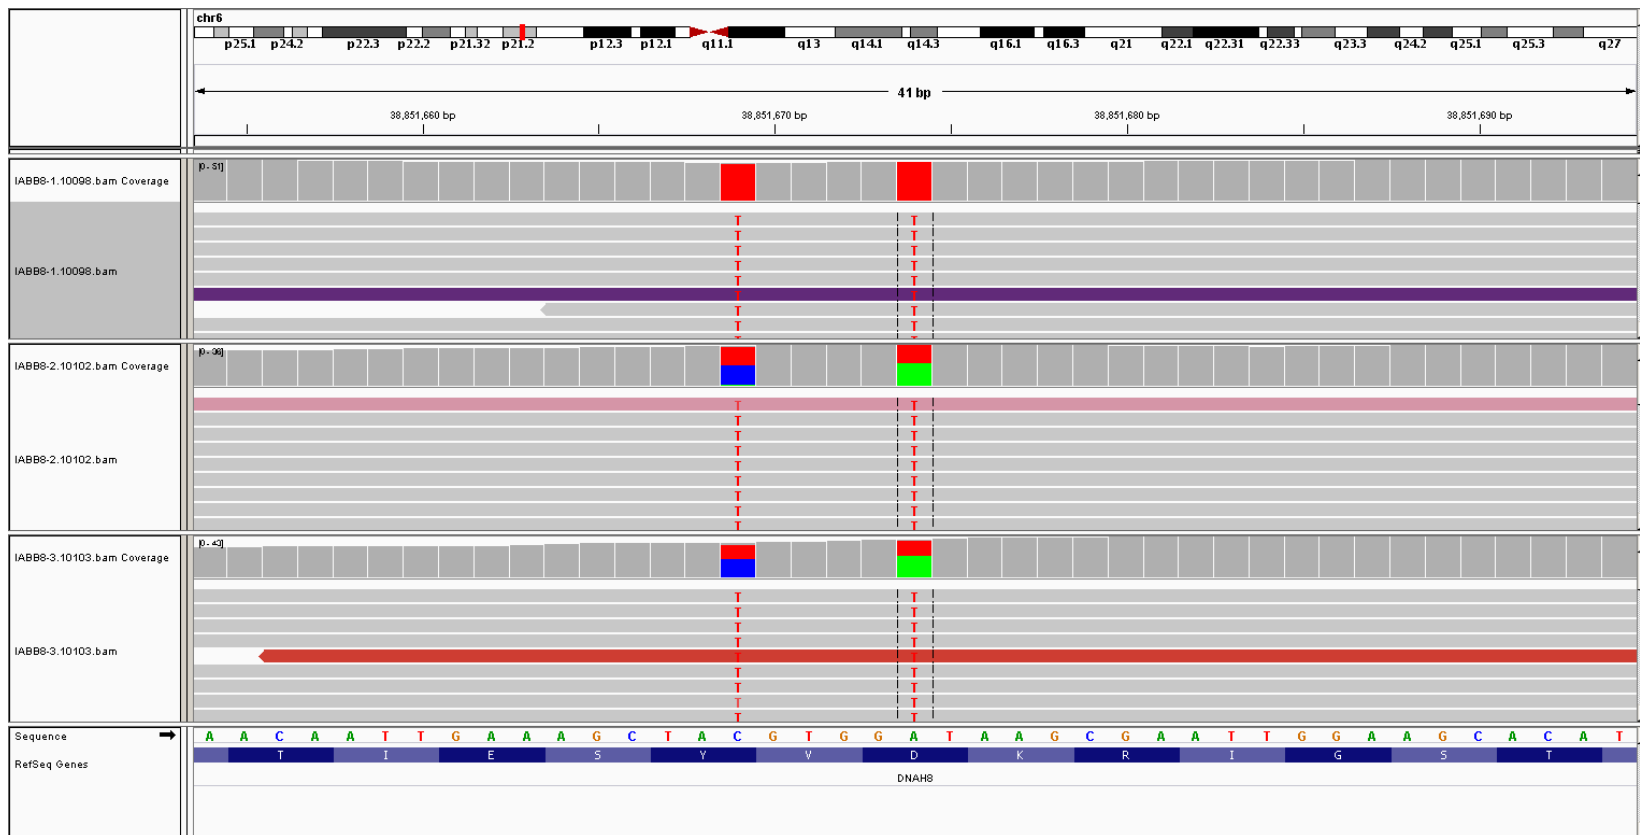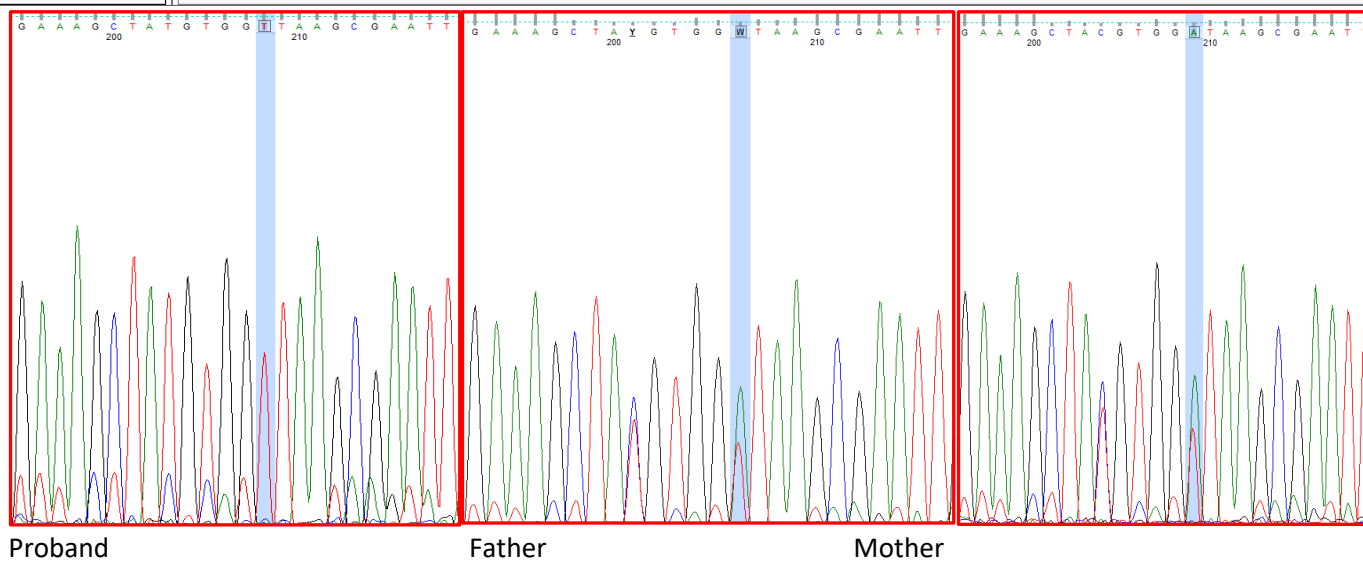

22. IAU7: PKD1L1

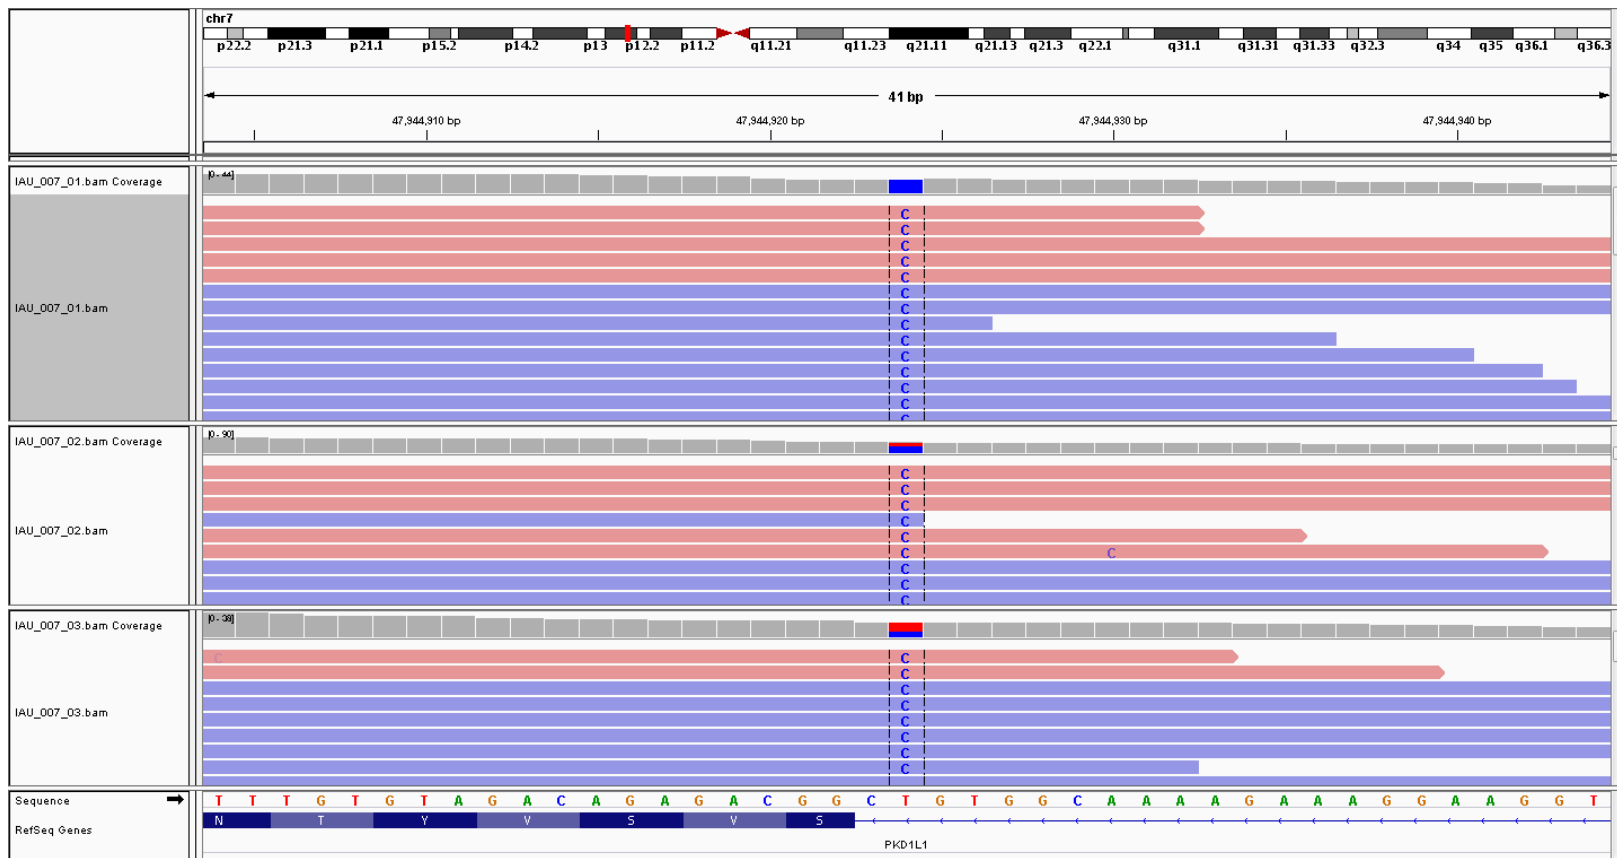

Proband

Father

Mother

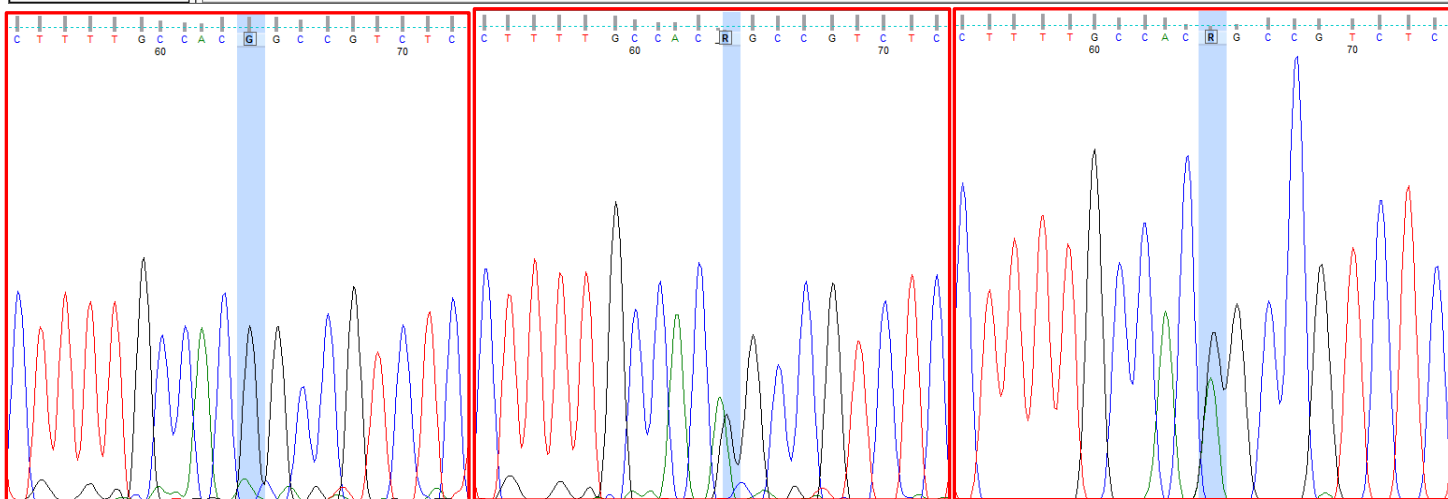

Proband

Father

Mother

23. SA7: ASL

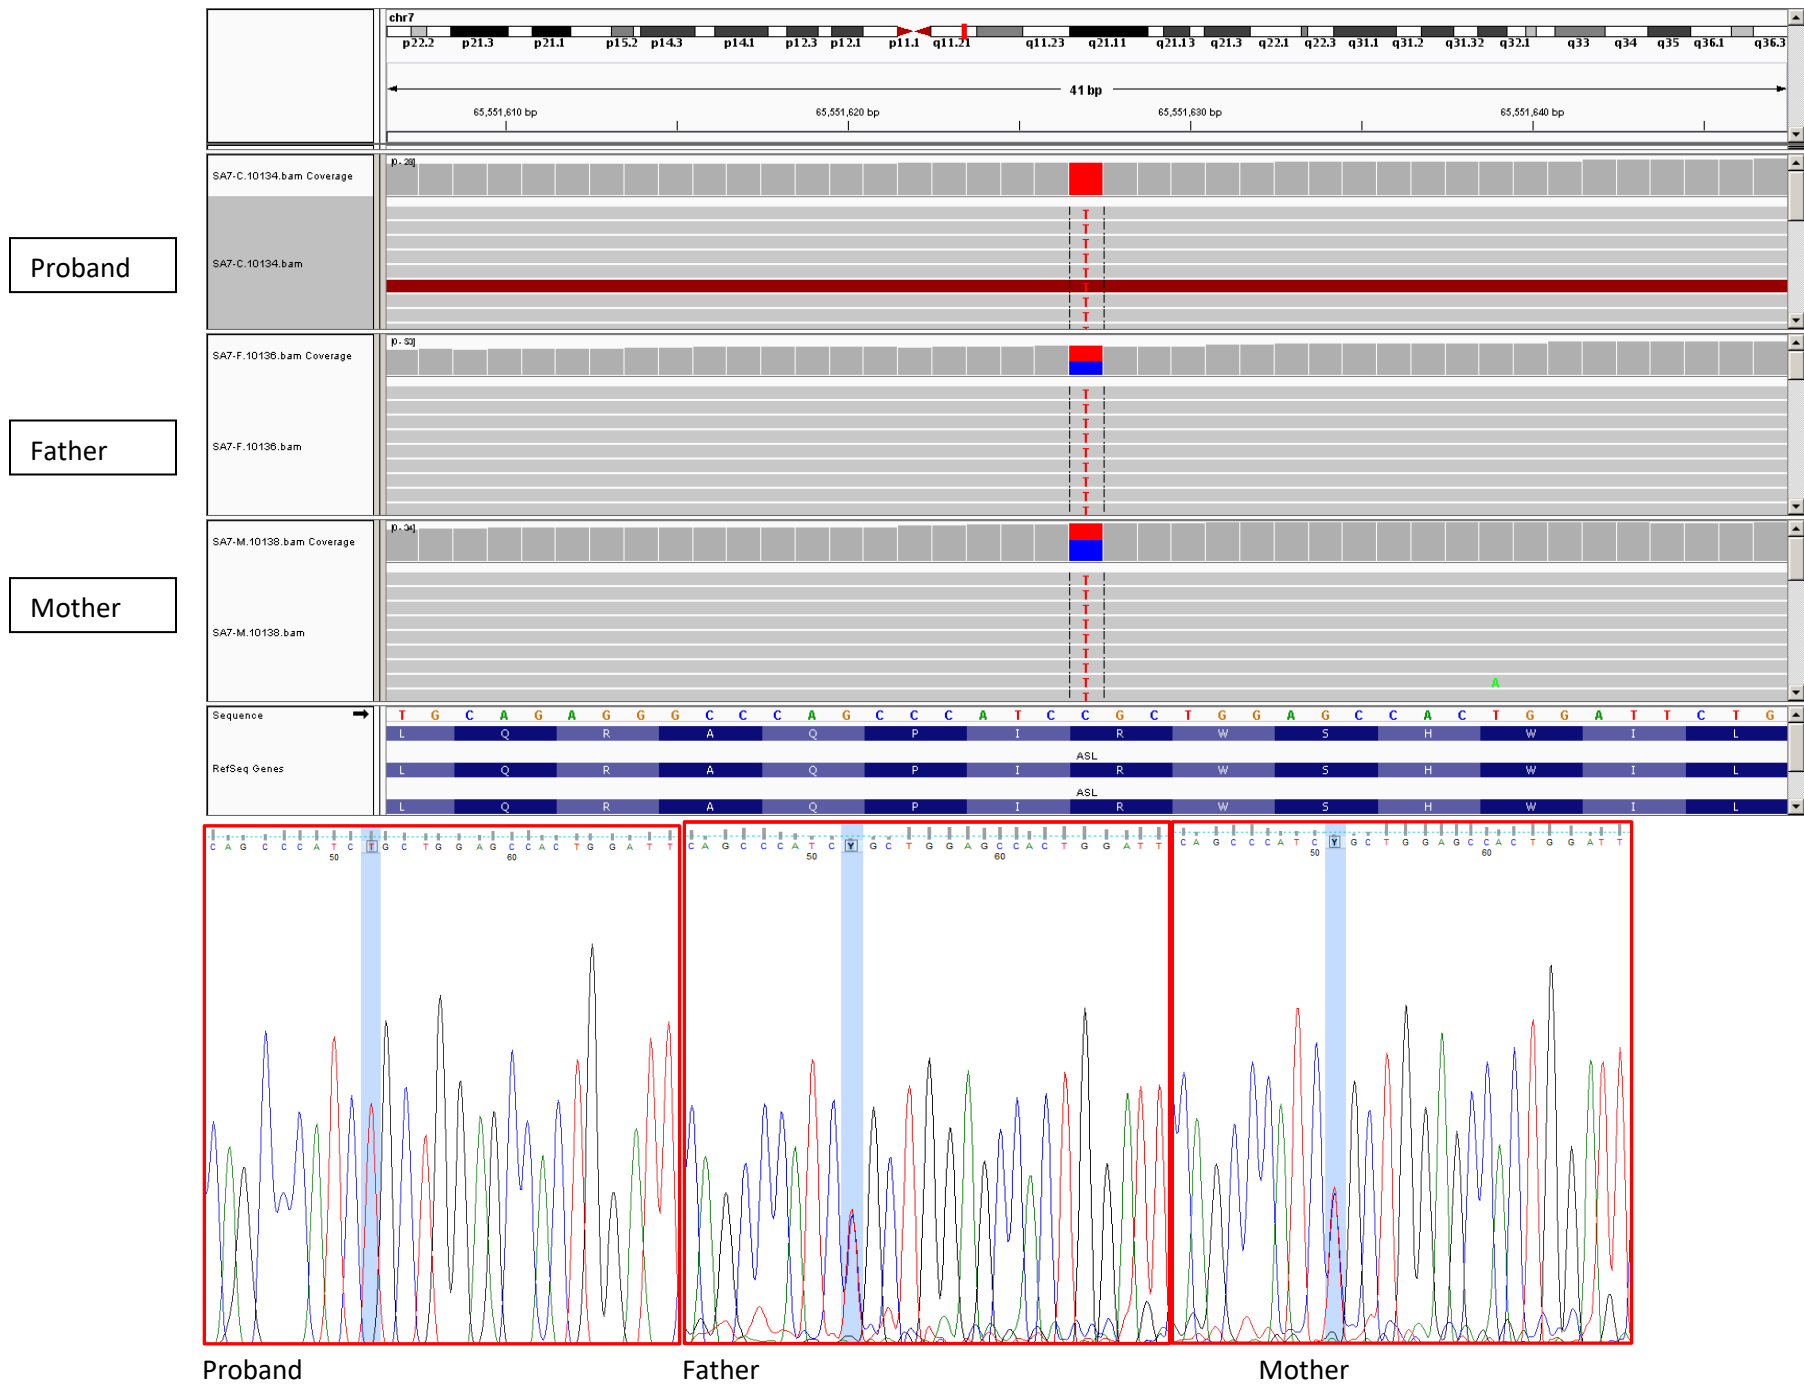

Proband

Father

Mother

Proband

Father

Mother

24. IABB7: CNPY4

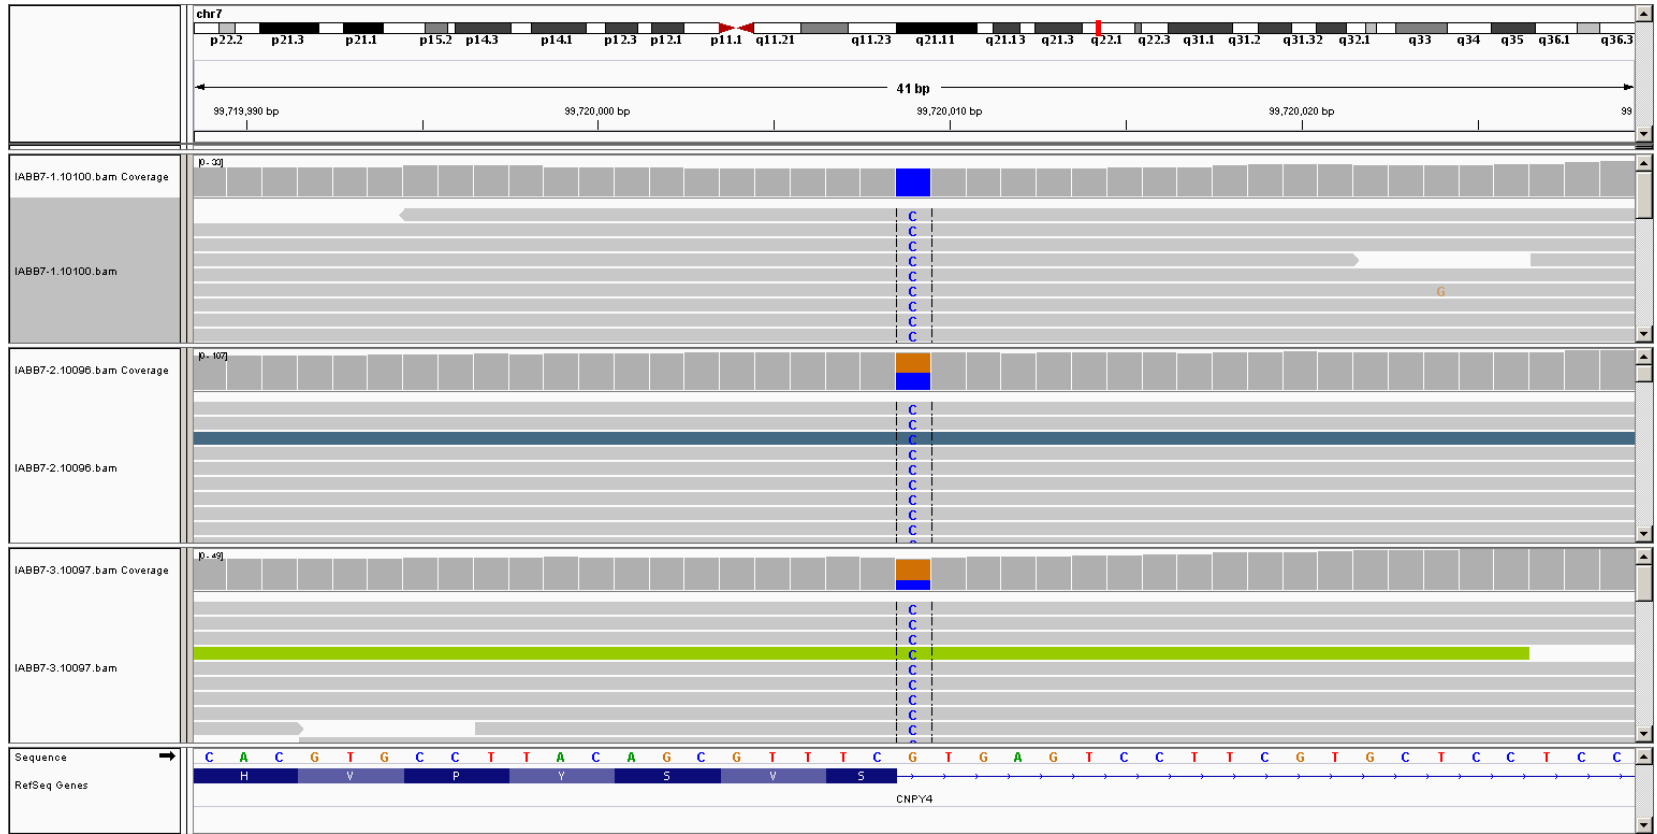

Proband

Father

Mother

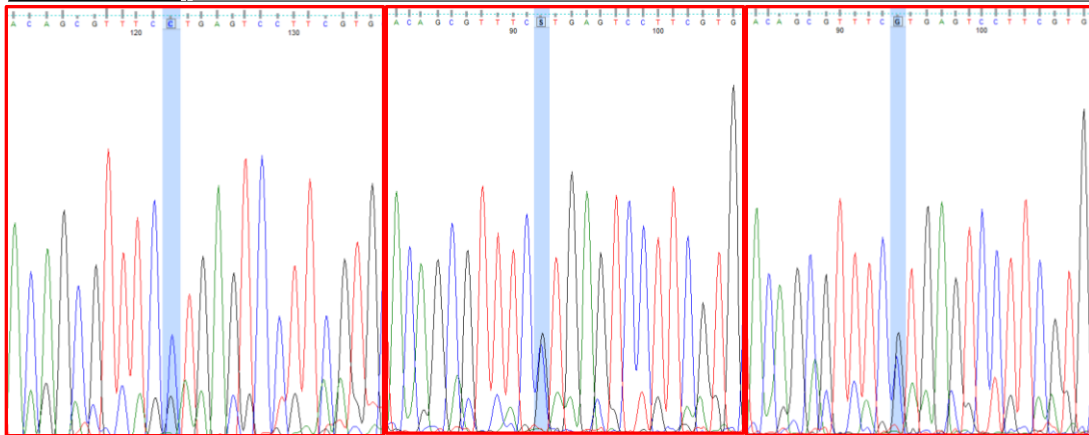

Proband

Father

Mother



25. IAU79: *GIMAP8*

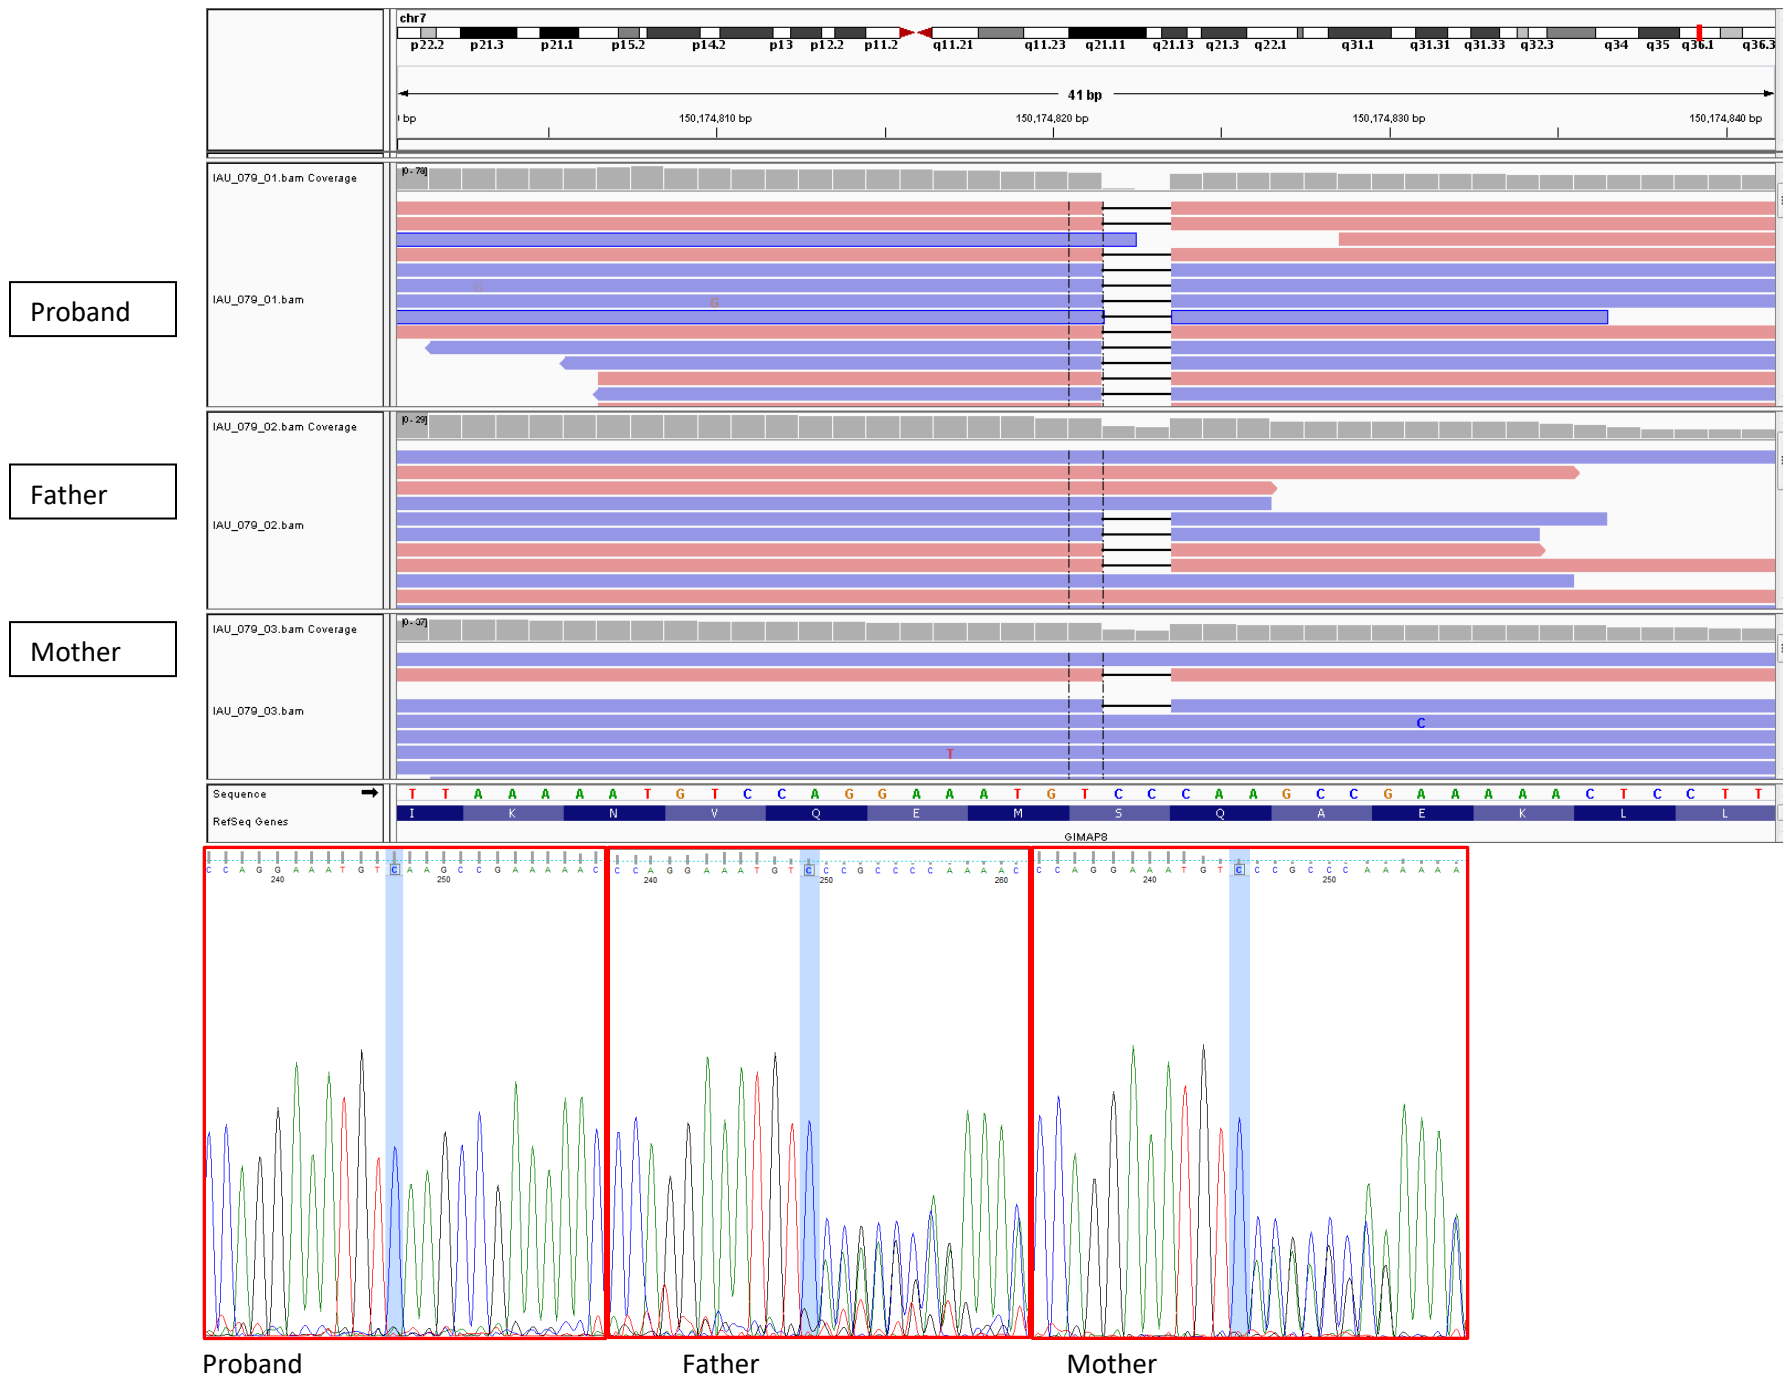

26. SMPA11: SHH

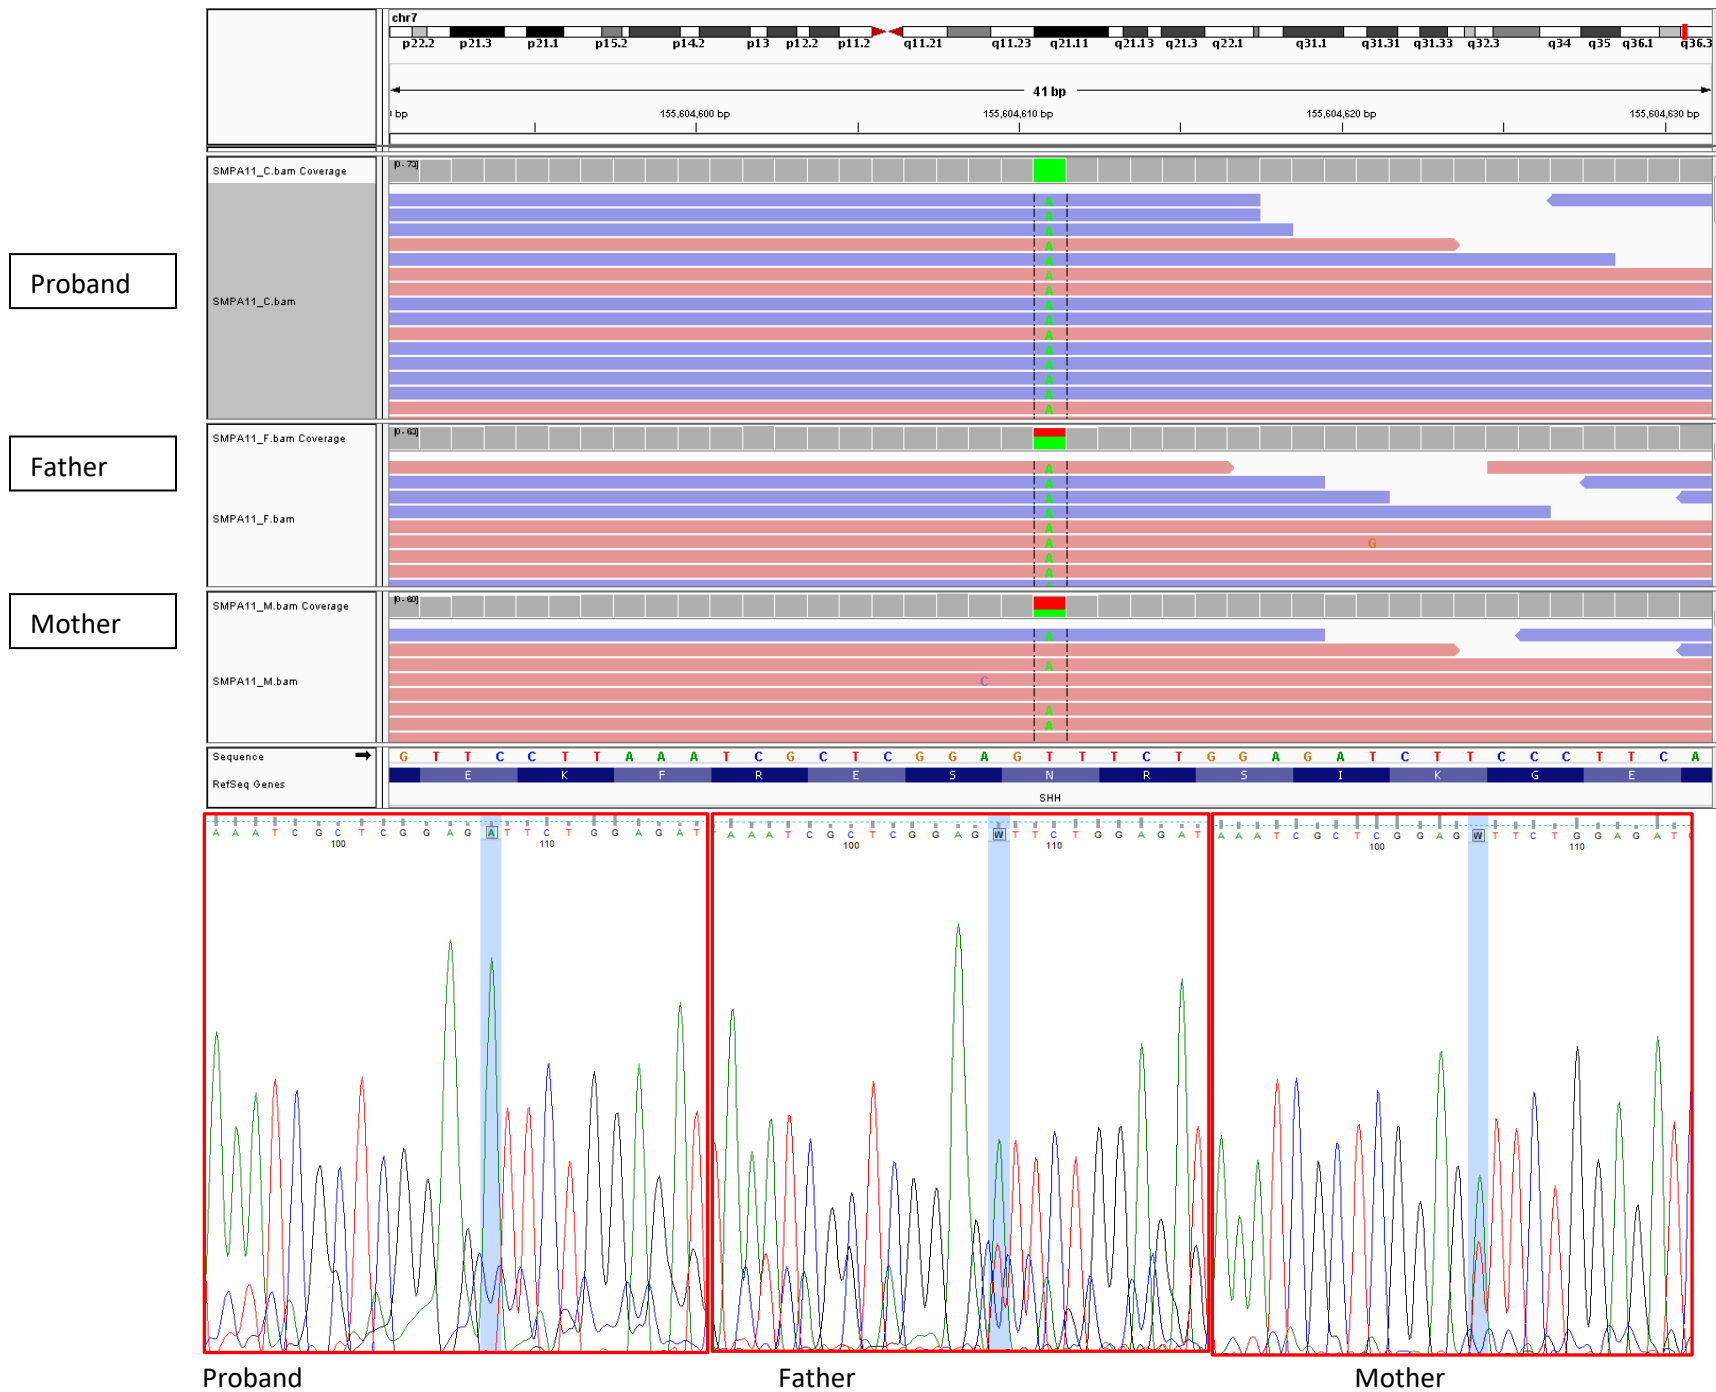

27. IABB3: VPS13B

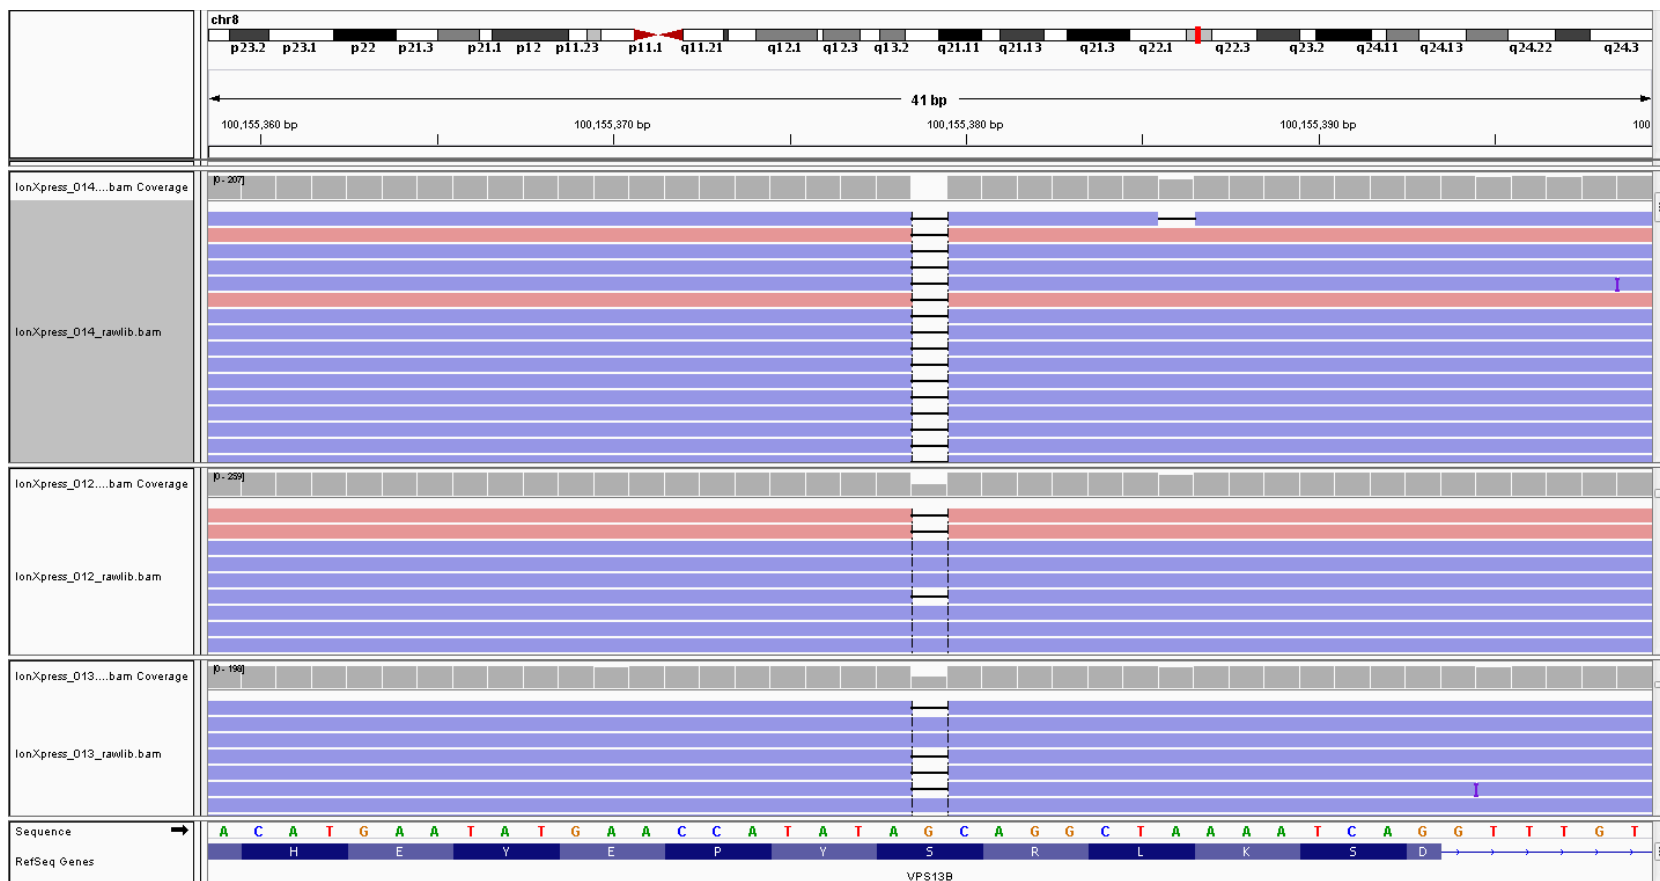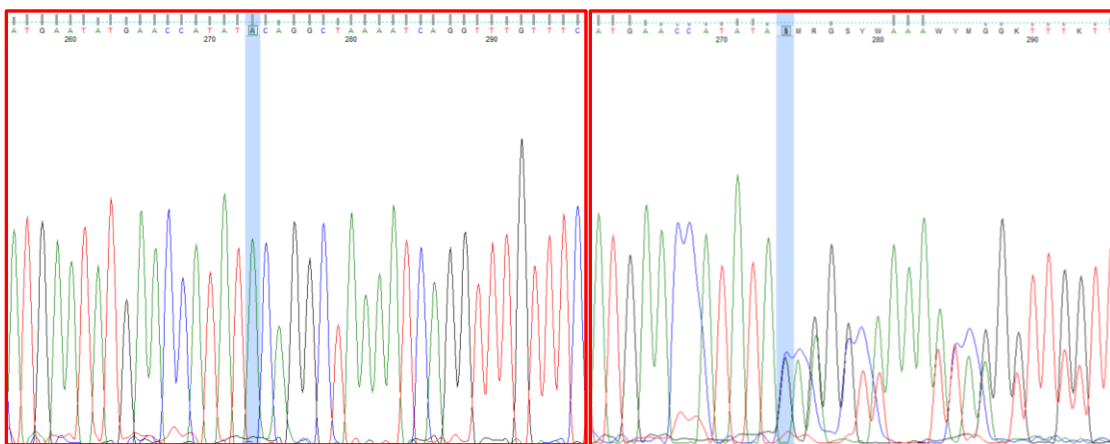

28. SA4: *ERMP1*

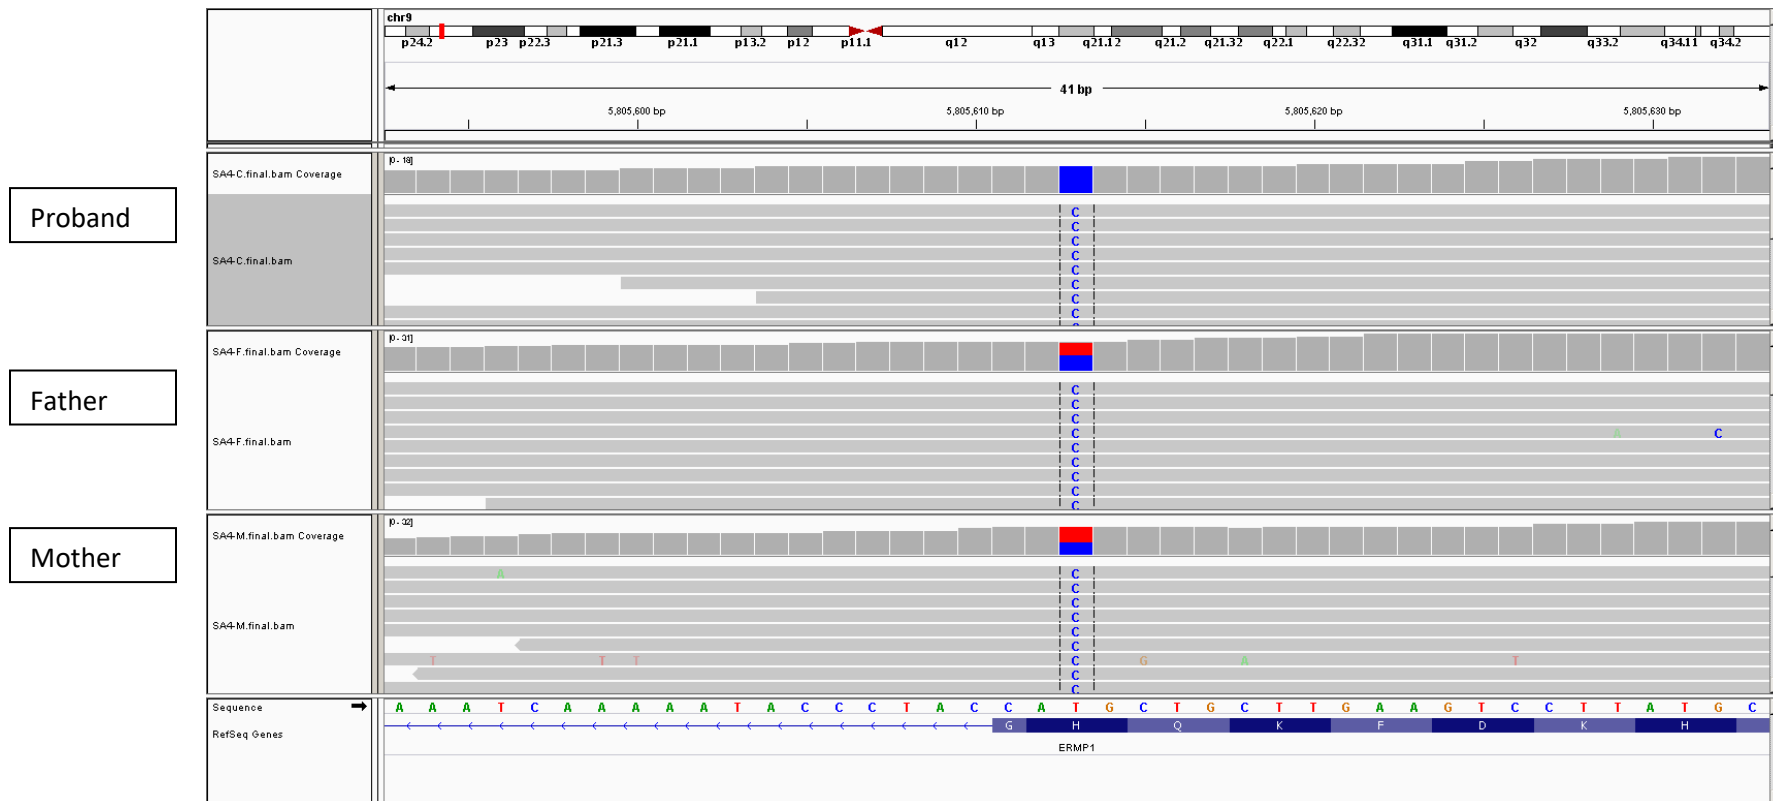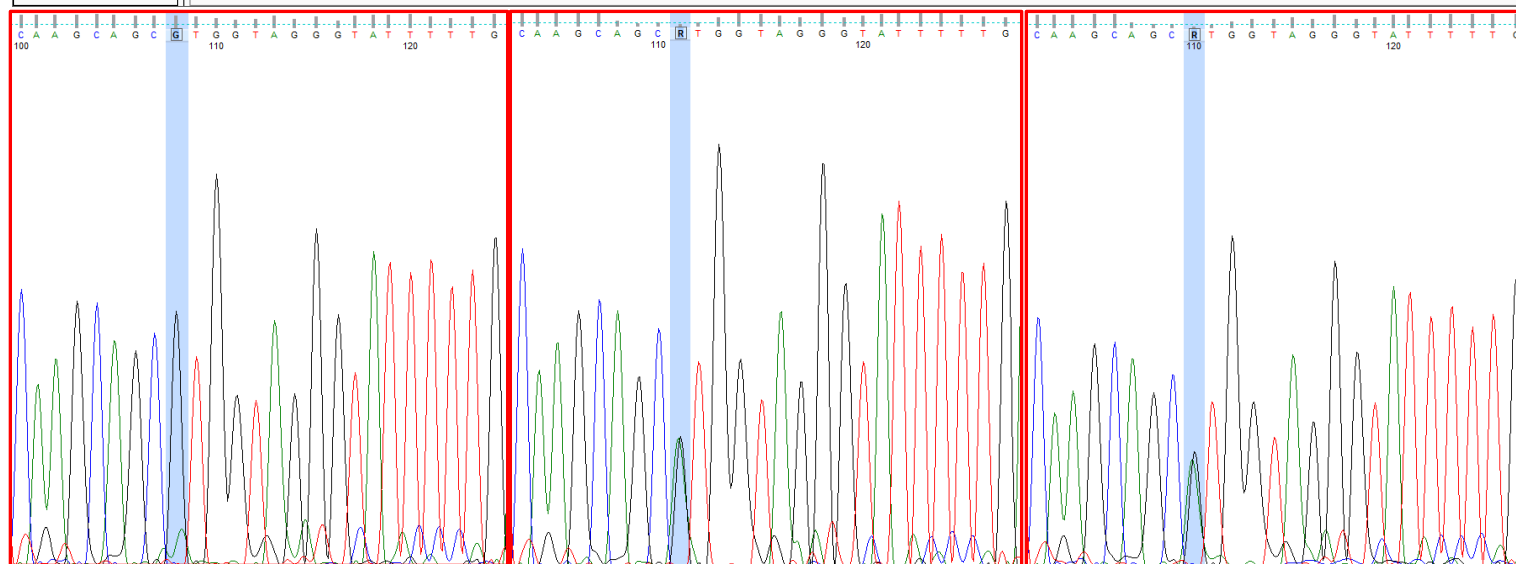

Proband

Father

Mother

29. IABB2: DEAF1

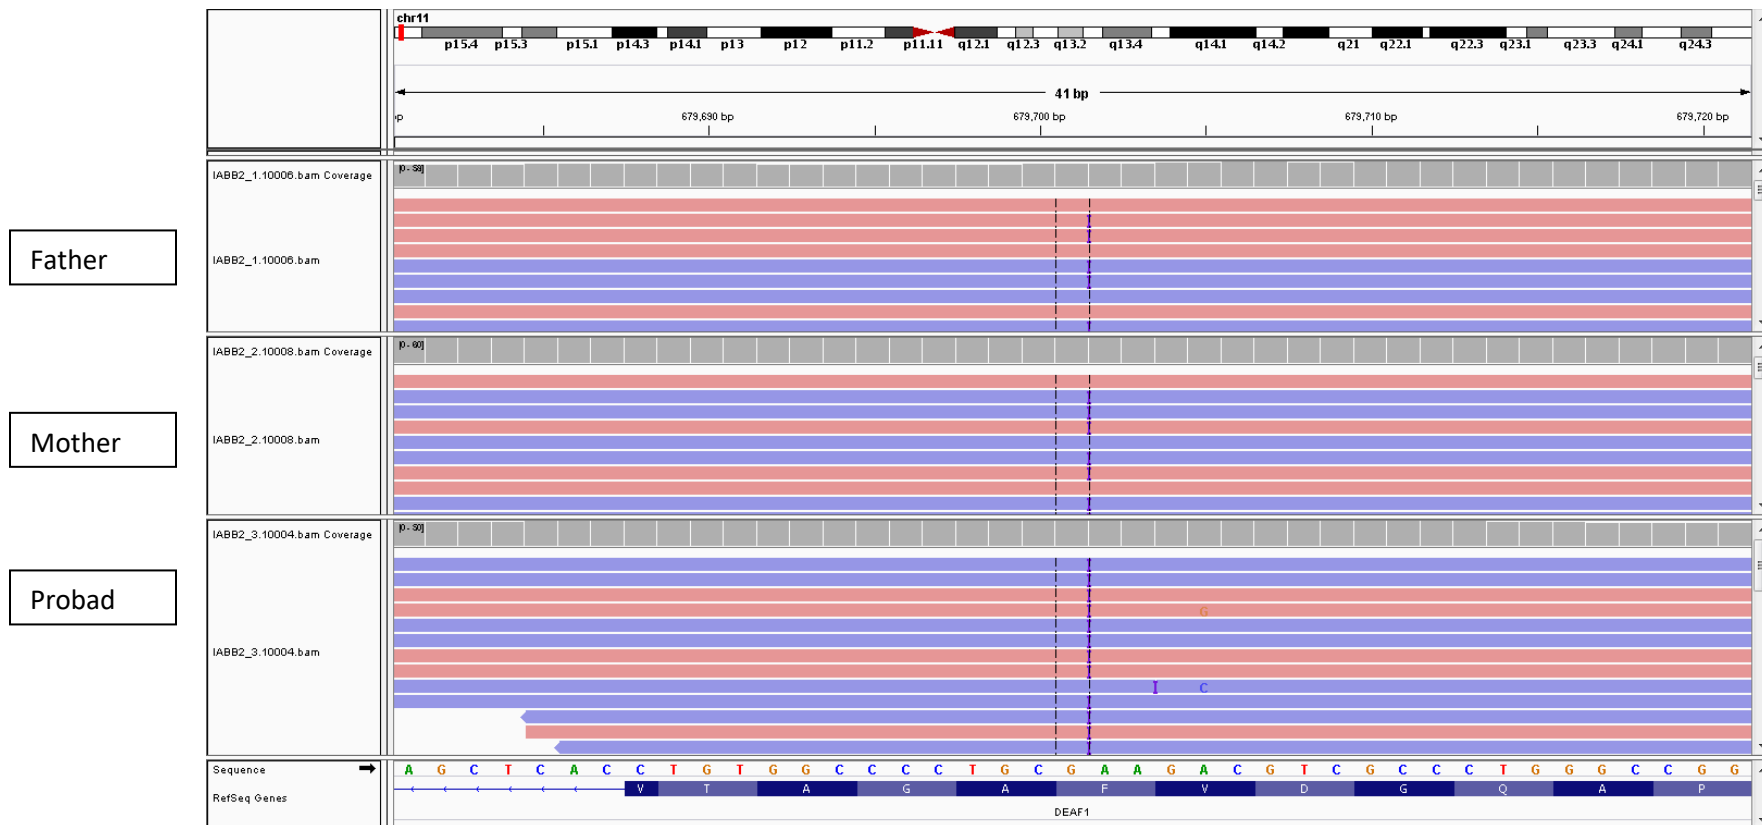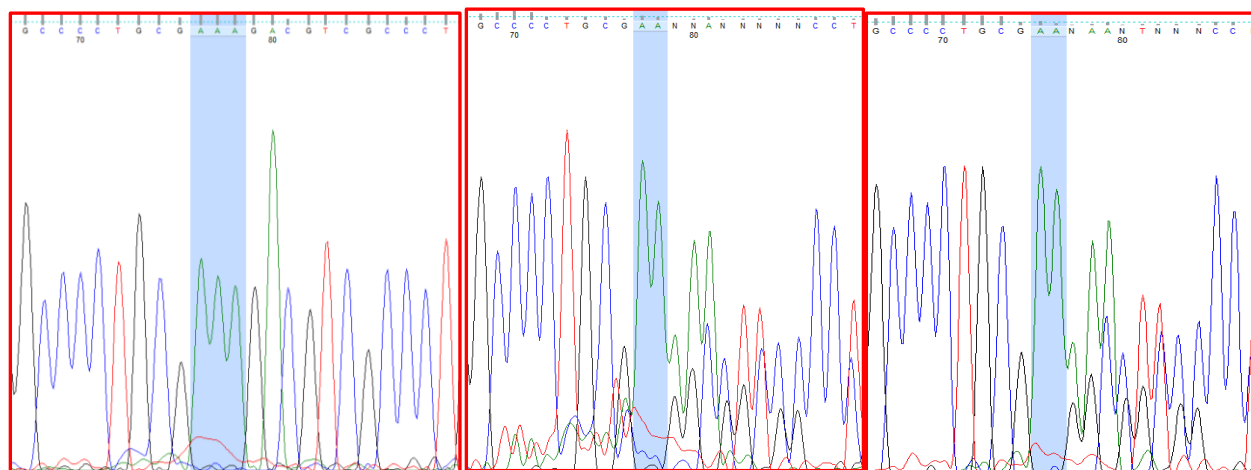

Proband

Father

Mother

30. SMPA11: *TRIM3*

Proband

Father

Mother

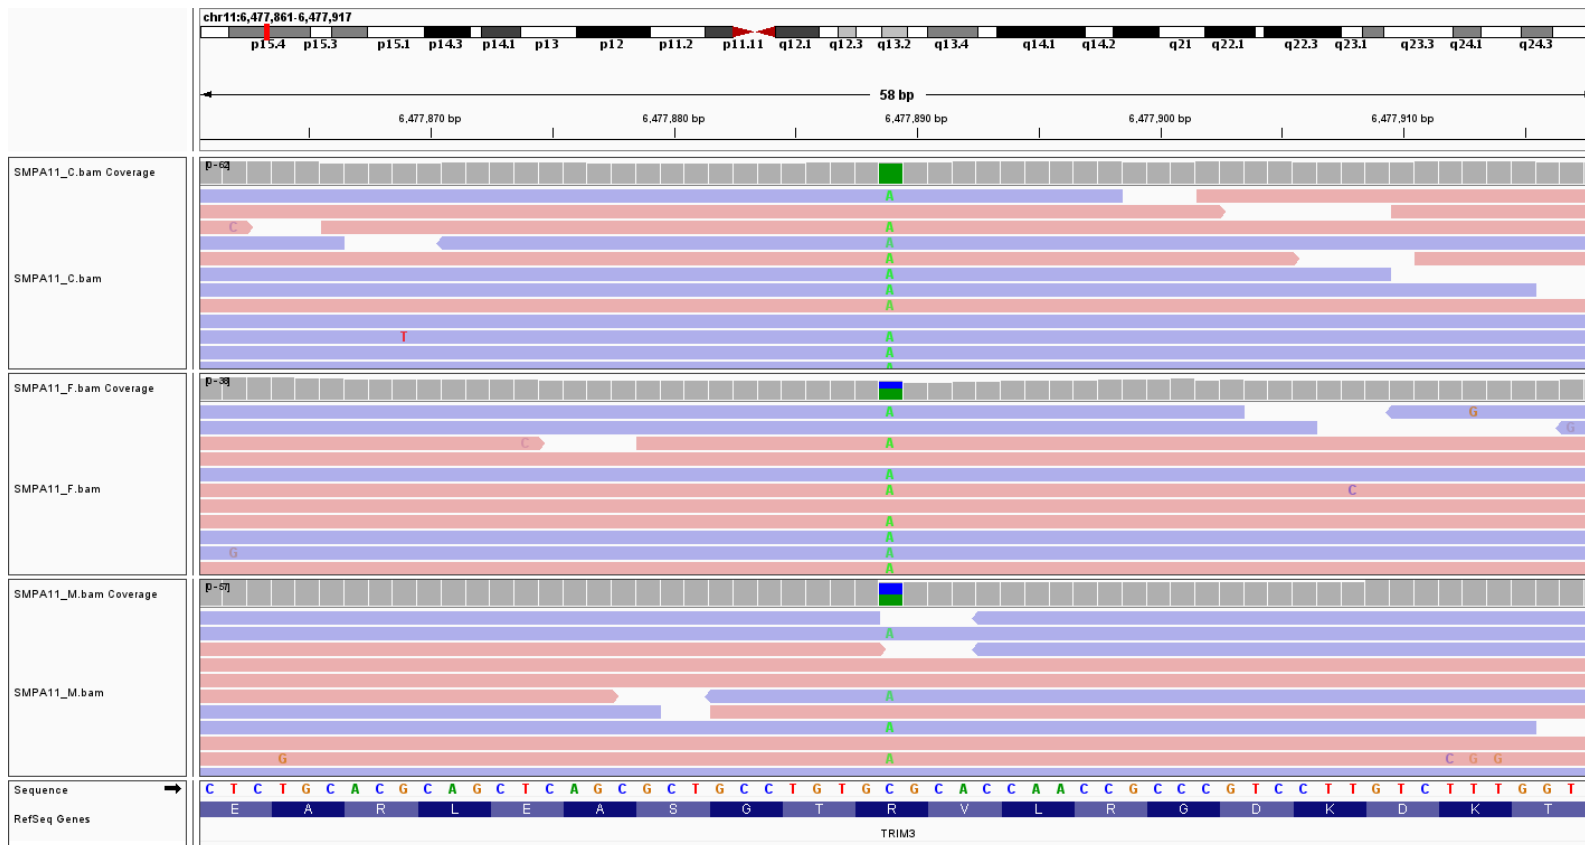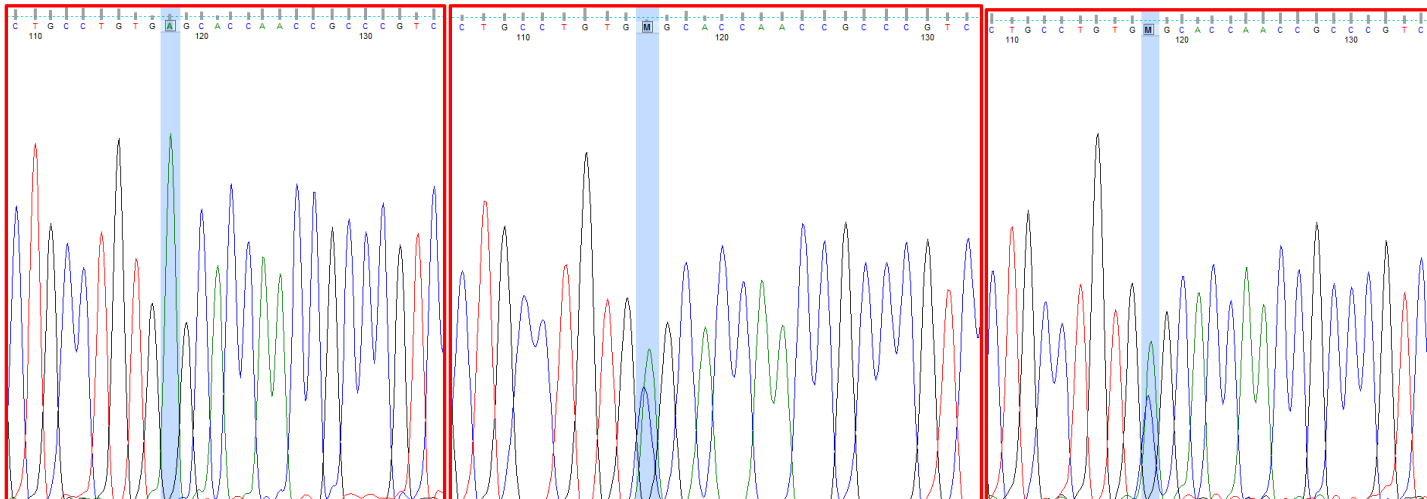

Proband

Father

Mother

31. SMPA20: MADD

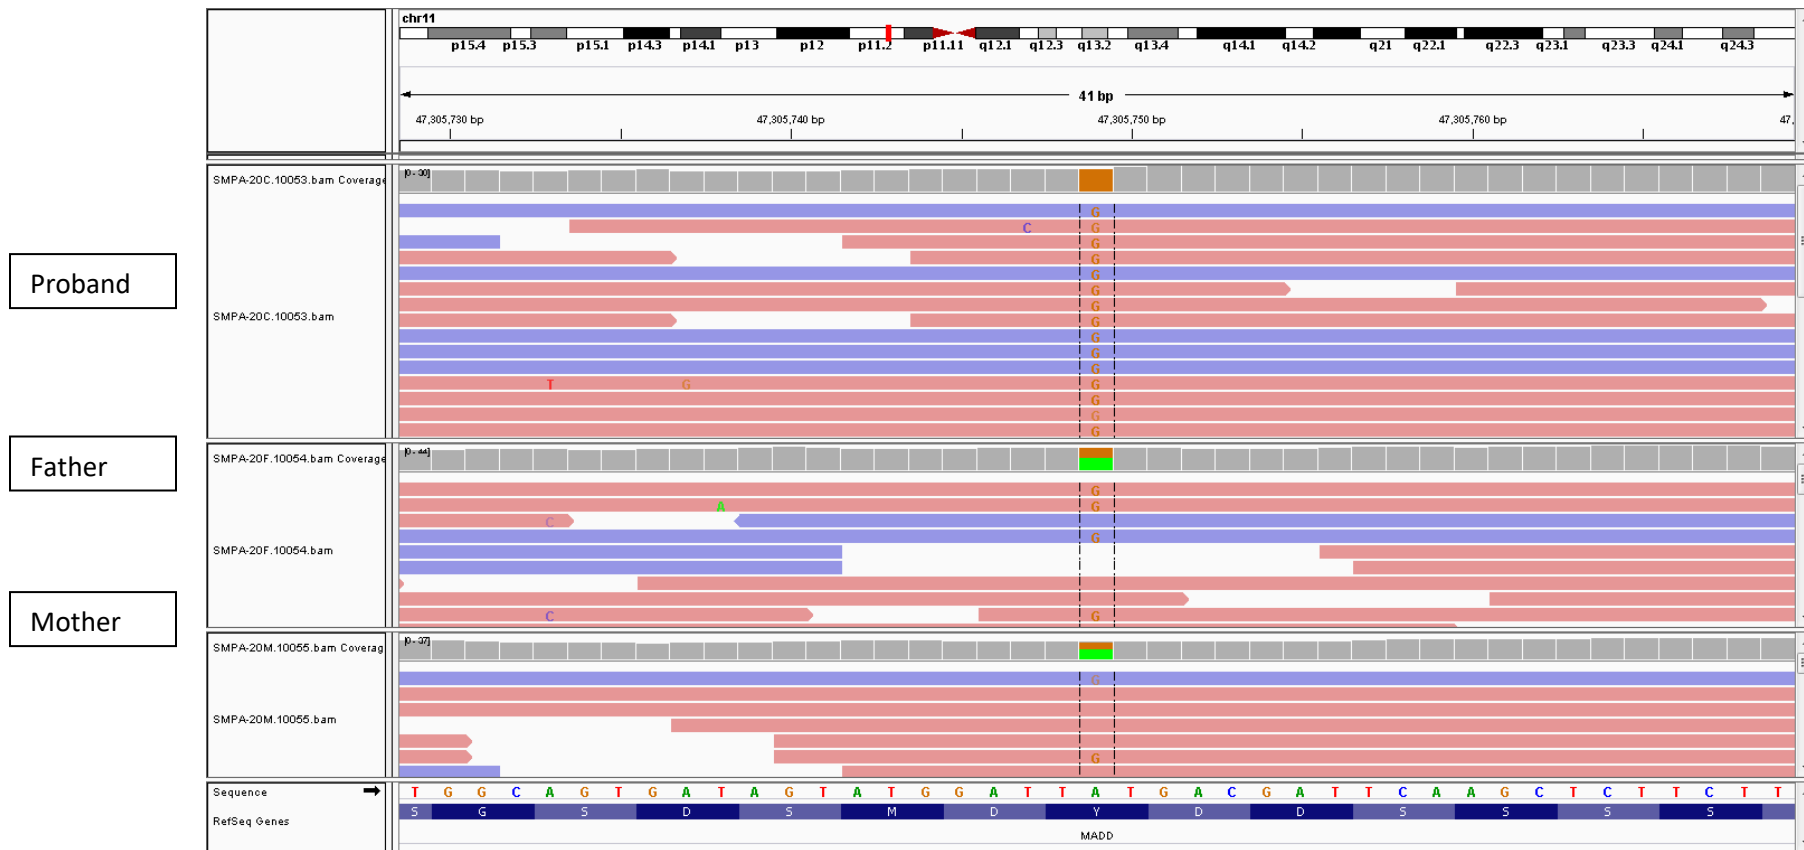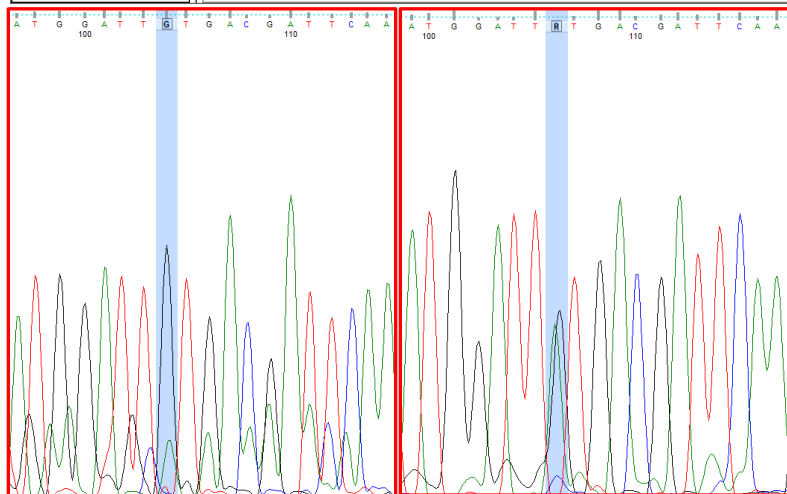

Proband

Father

32. SMPA21: *DAGLA*

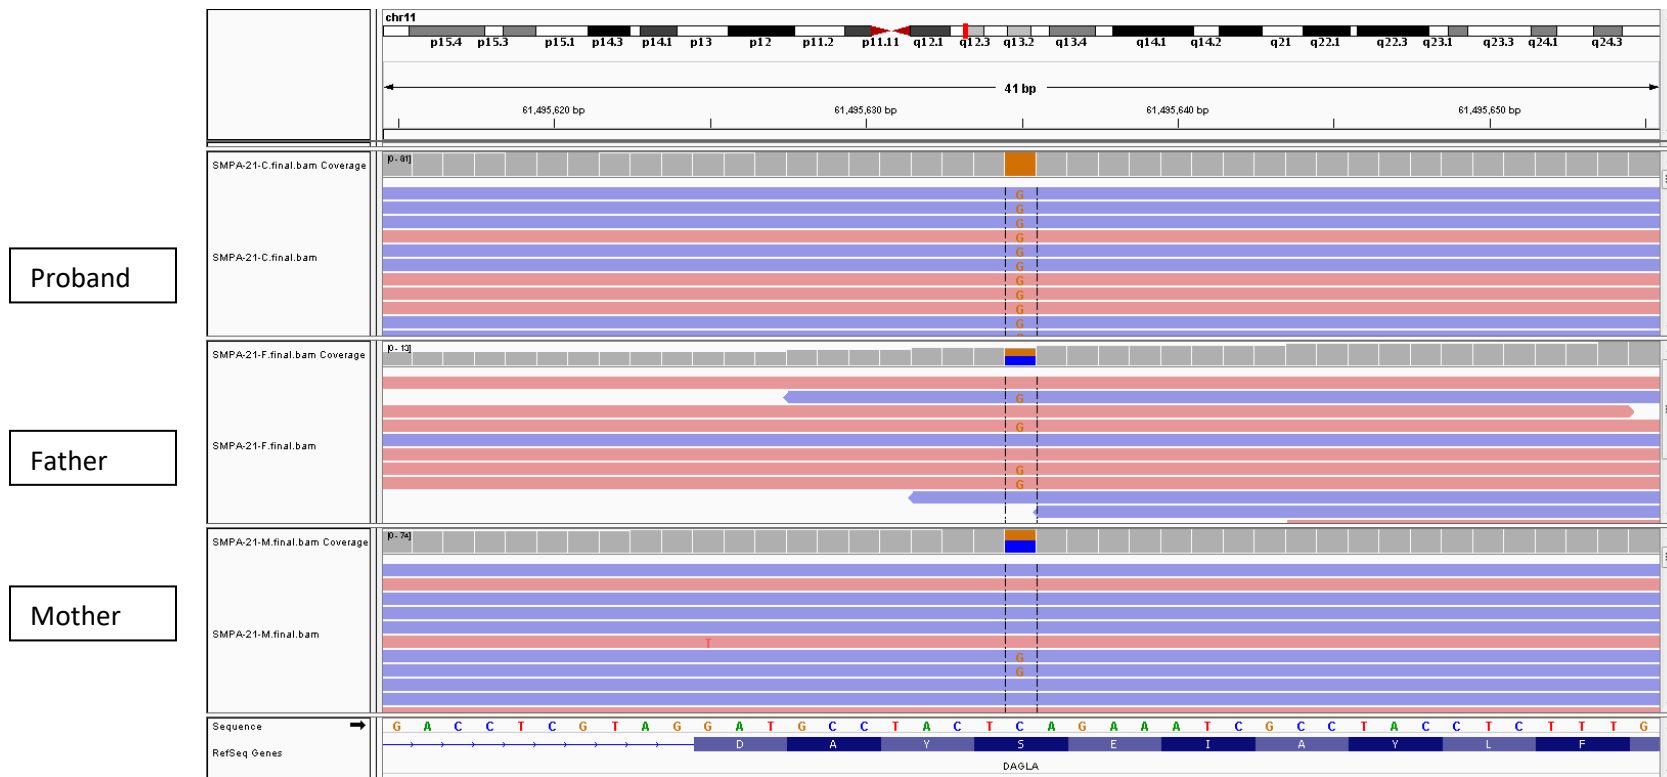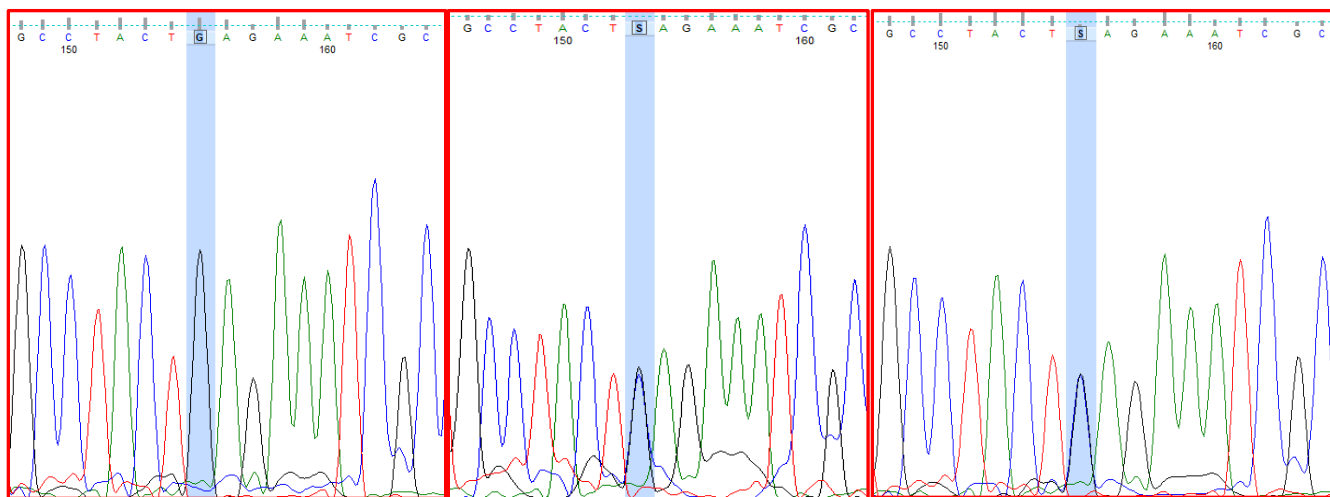

Proband

Father

Mother



33. SMPA80: CABP2

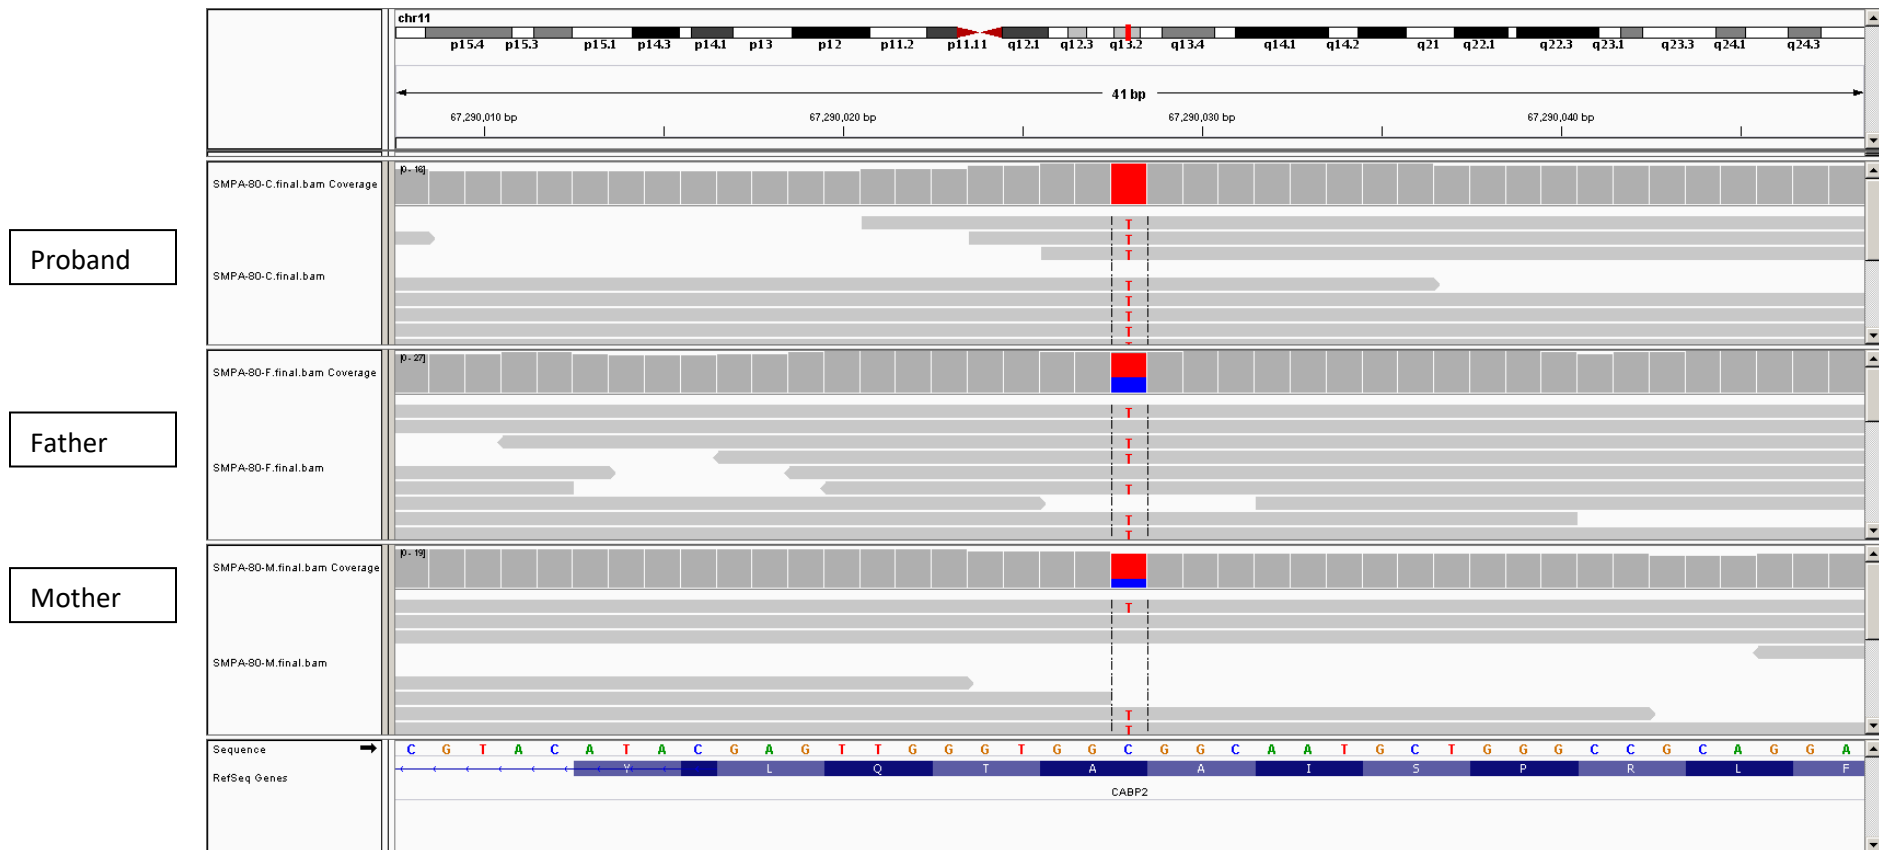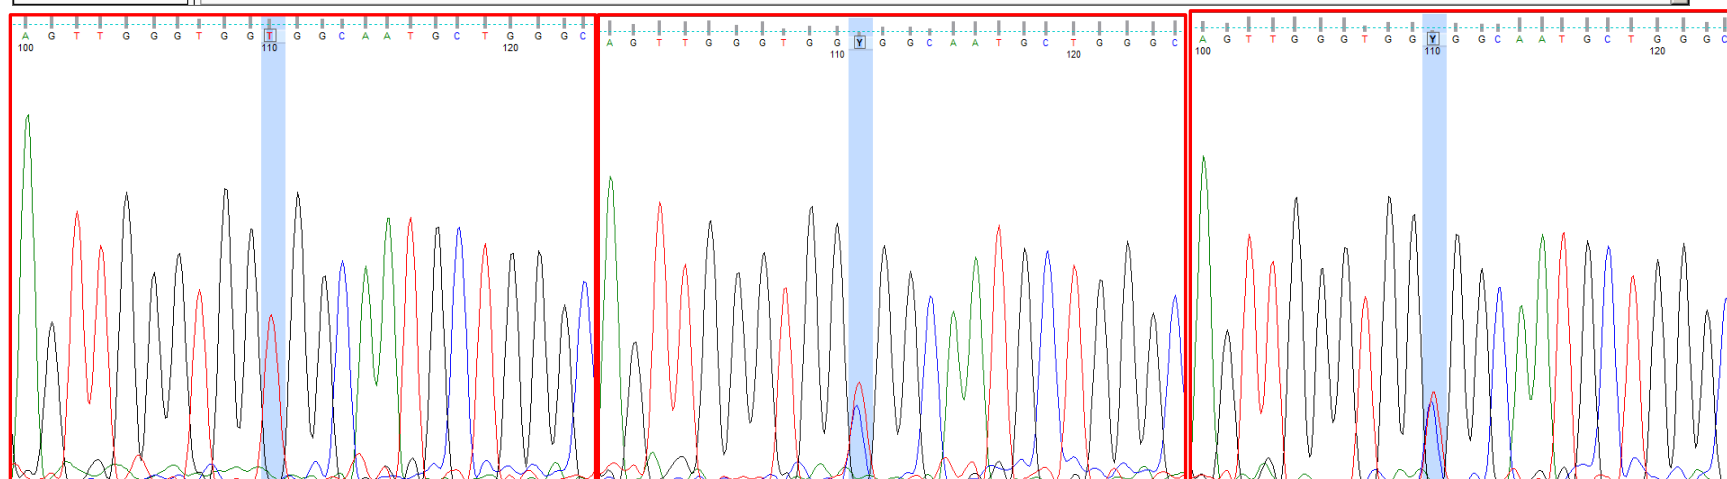

Proband

Father

Mother

34. SMPA8: *TMEM25*

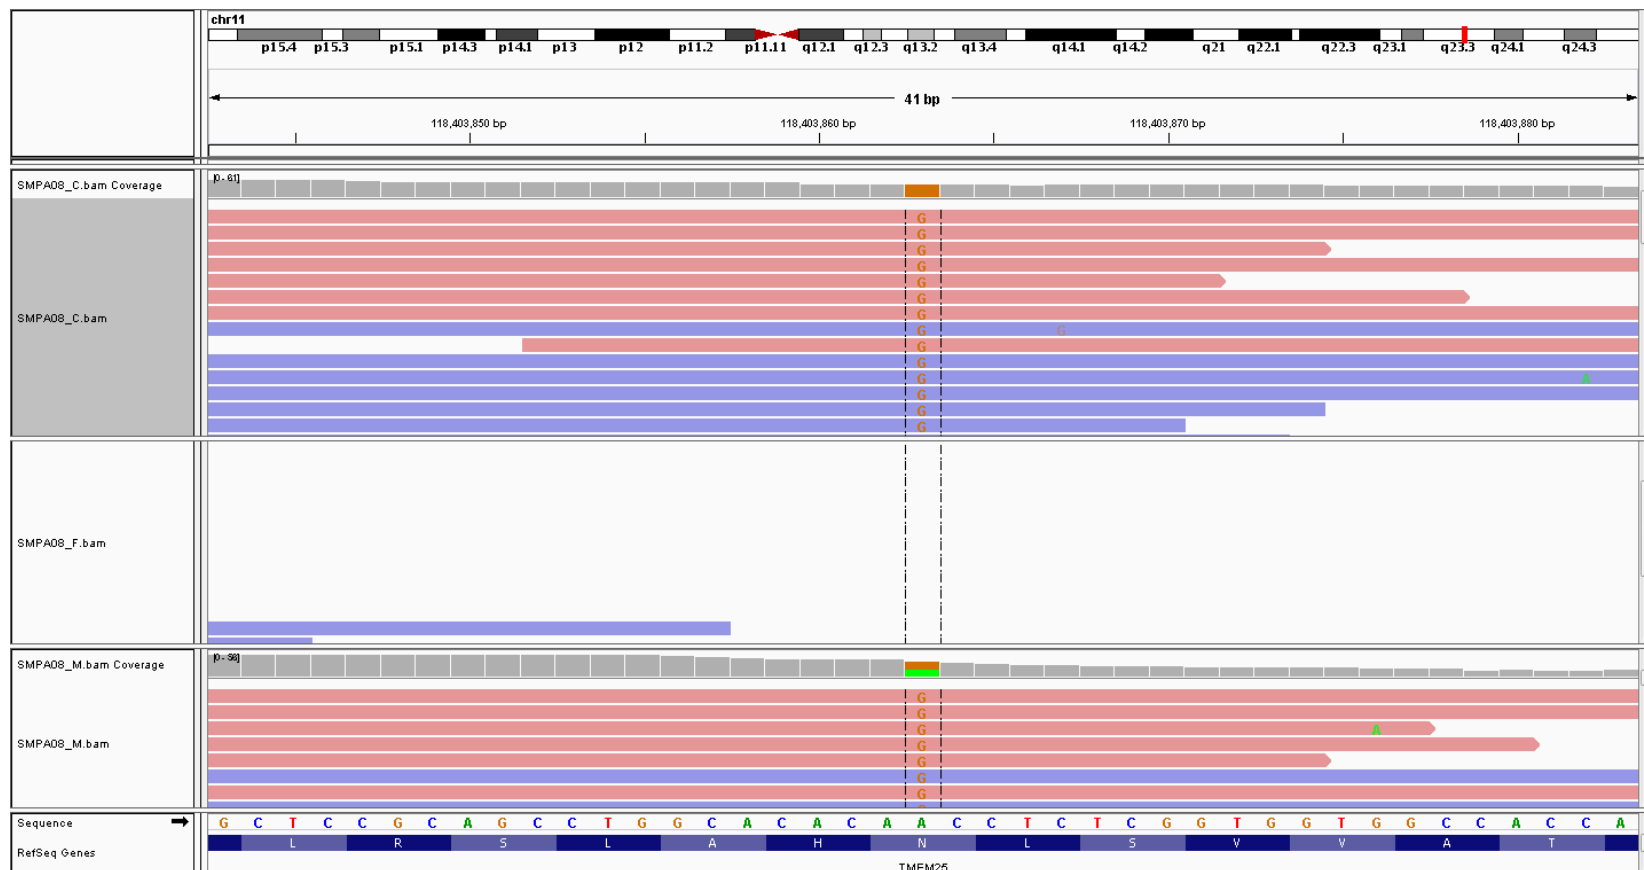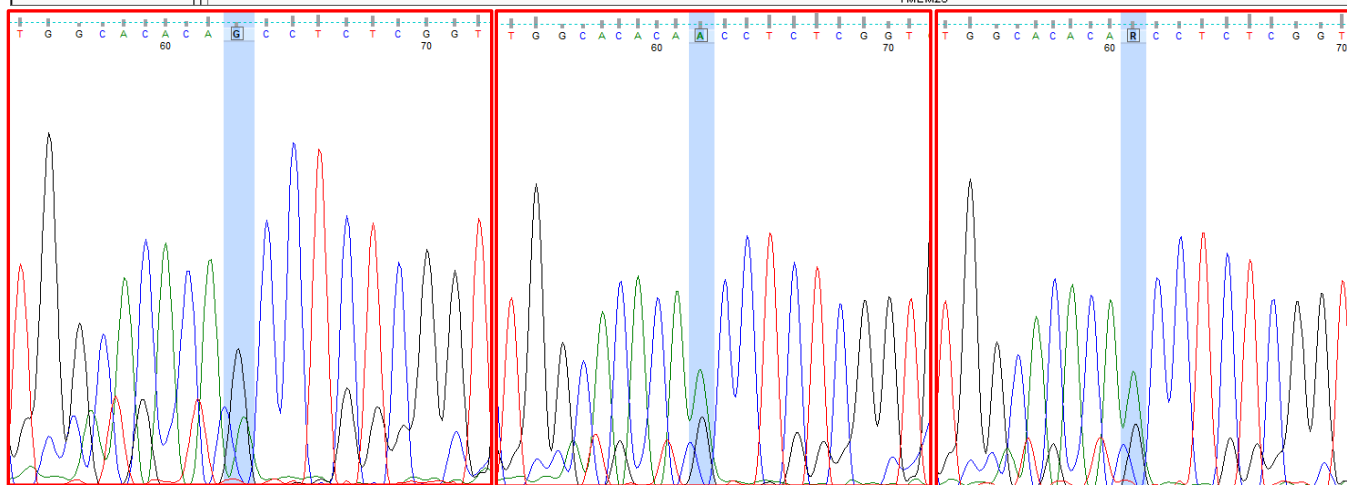

Proband

Father

Mother

35. IAU79: *B4GALNT1*

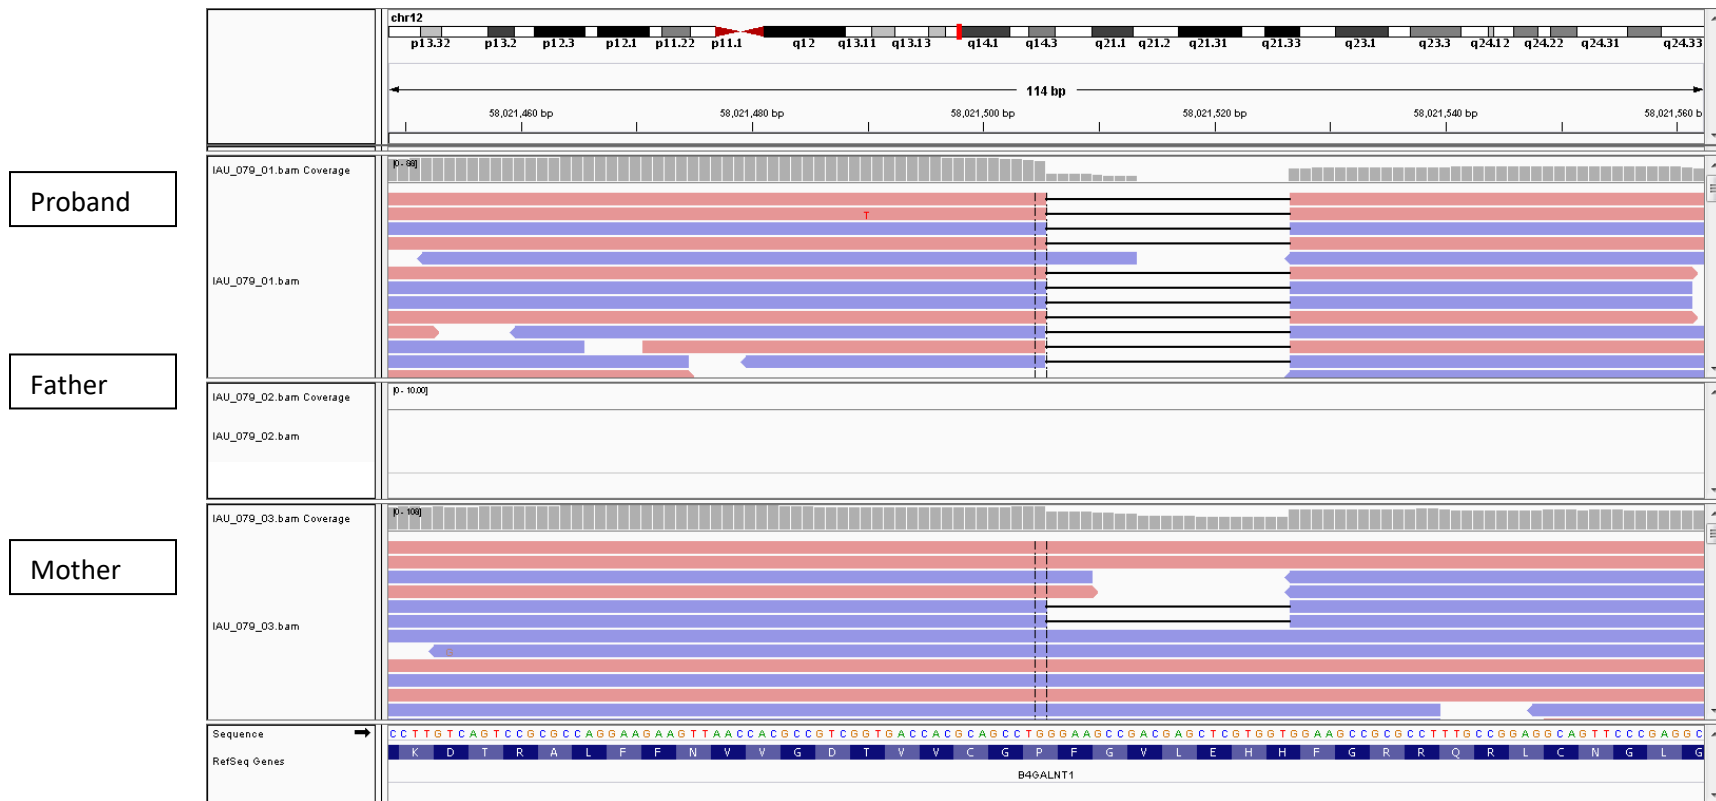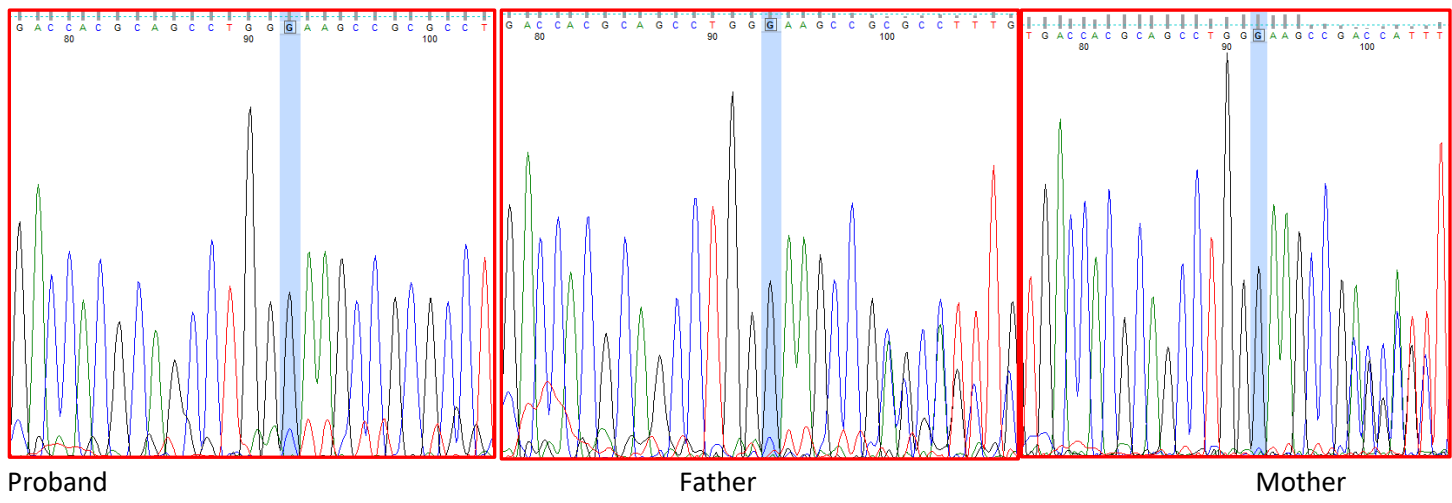

36. IABB10: CPM

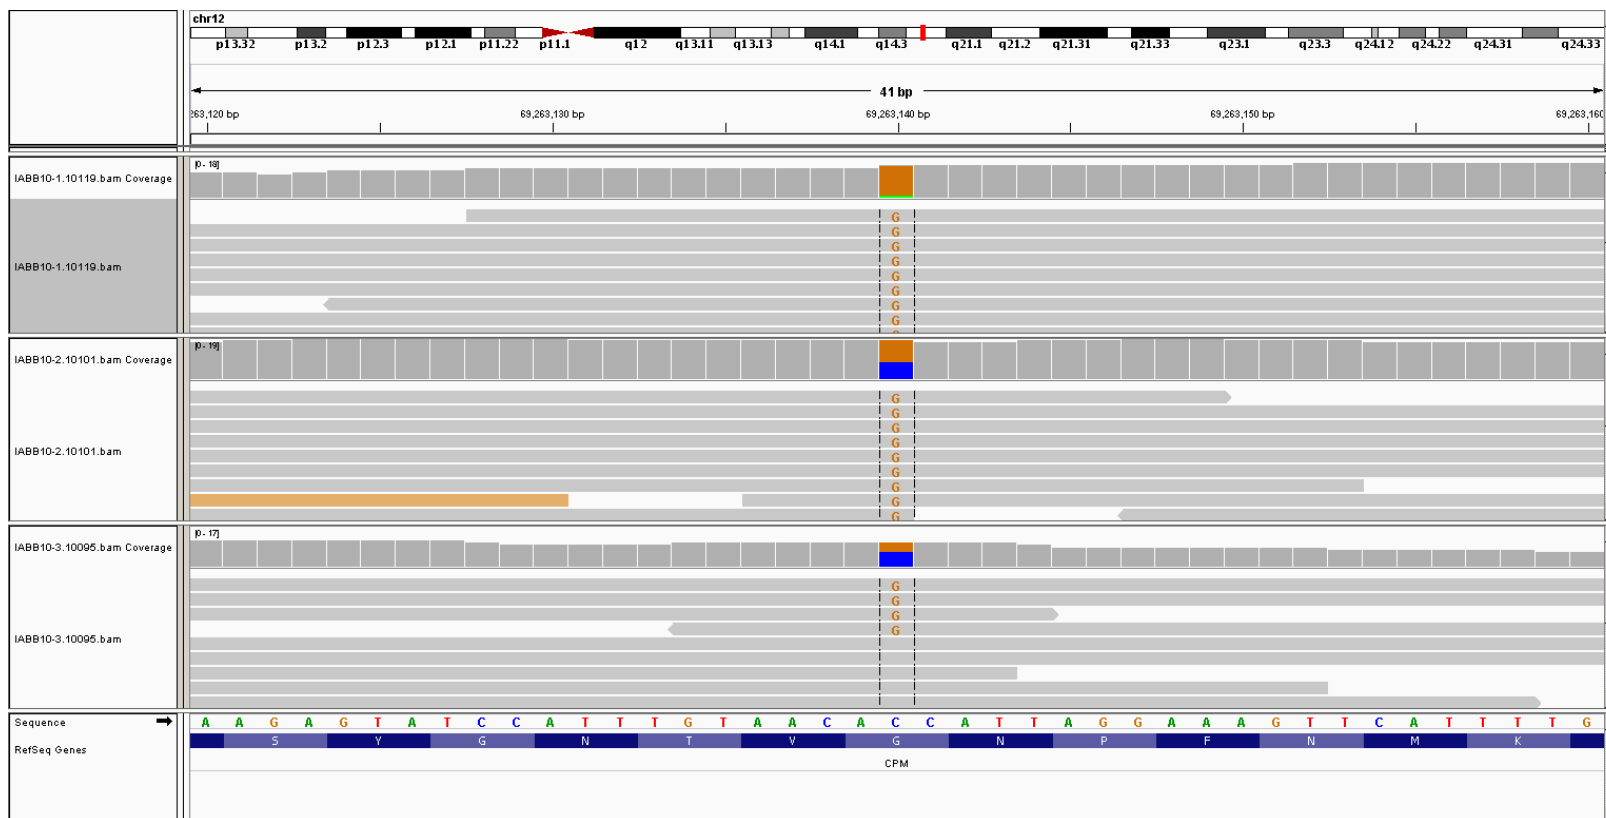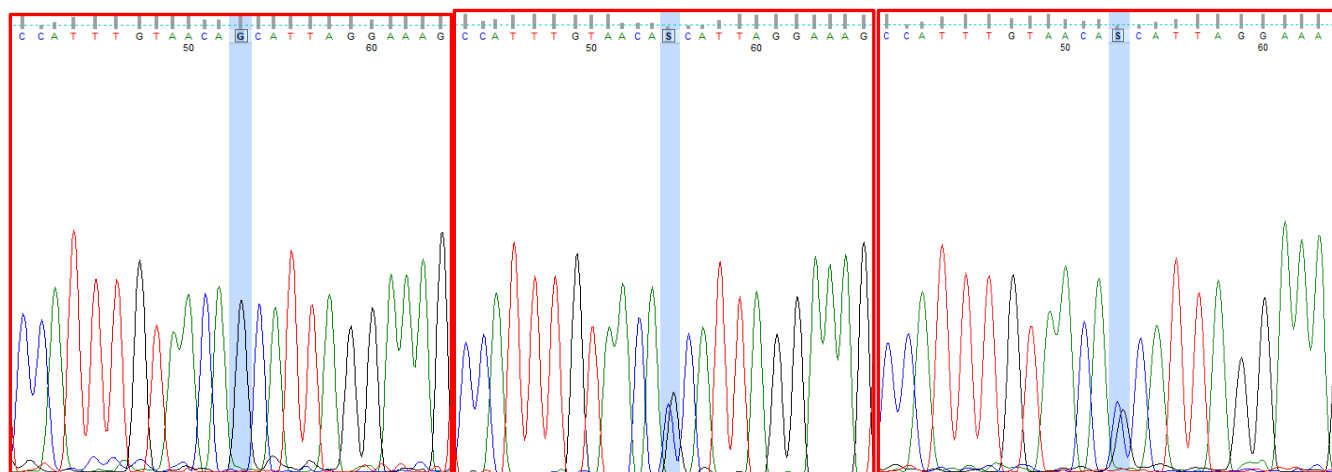

Proband

Father

Mother

37. IABB11:KSR2 (proband DNA exhausted)

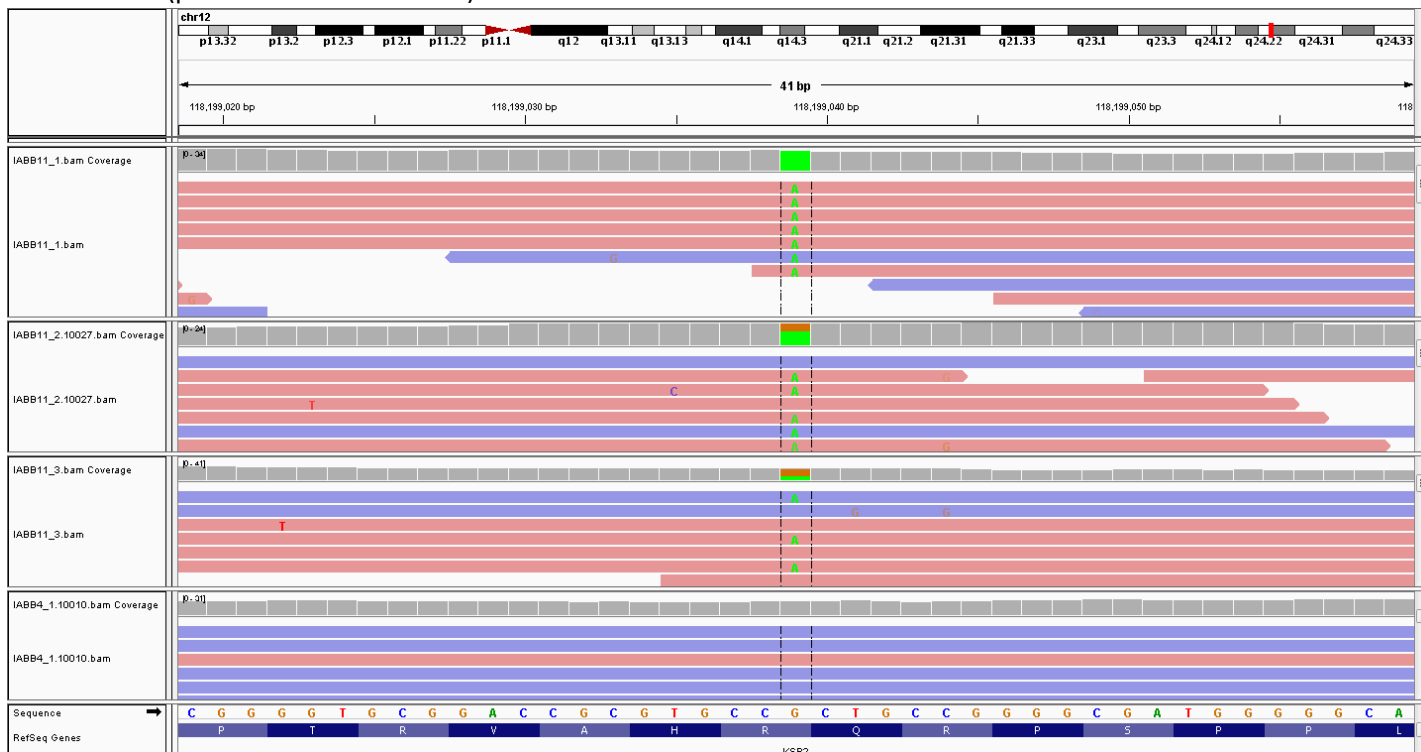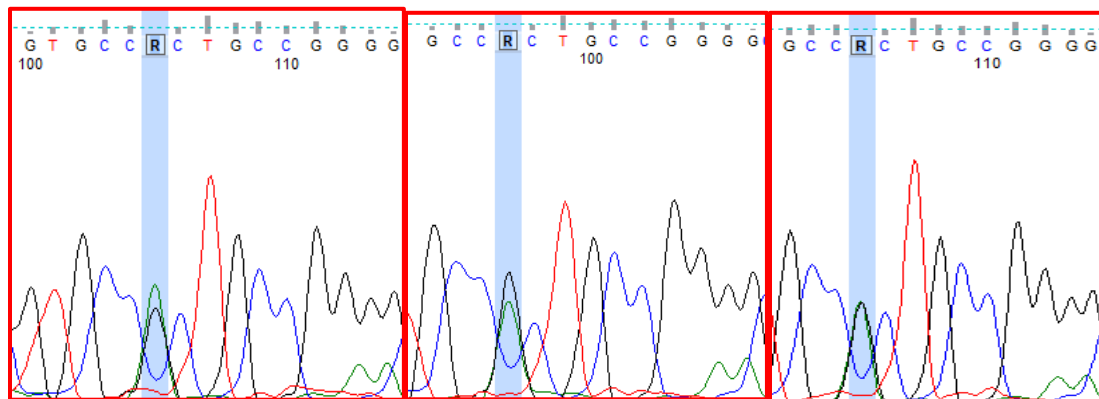

IABB11-3

IABB11-2

IABB11-4 (unaffected sibling)

38. SMPA8: *PPP1R36*

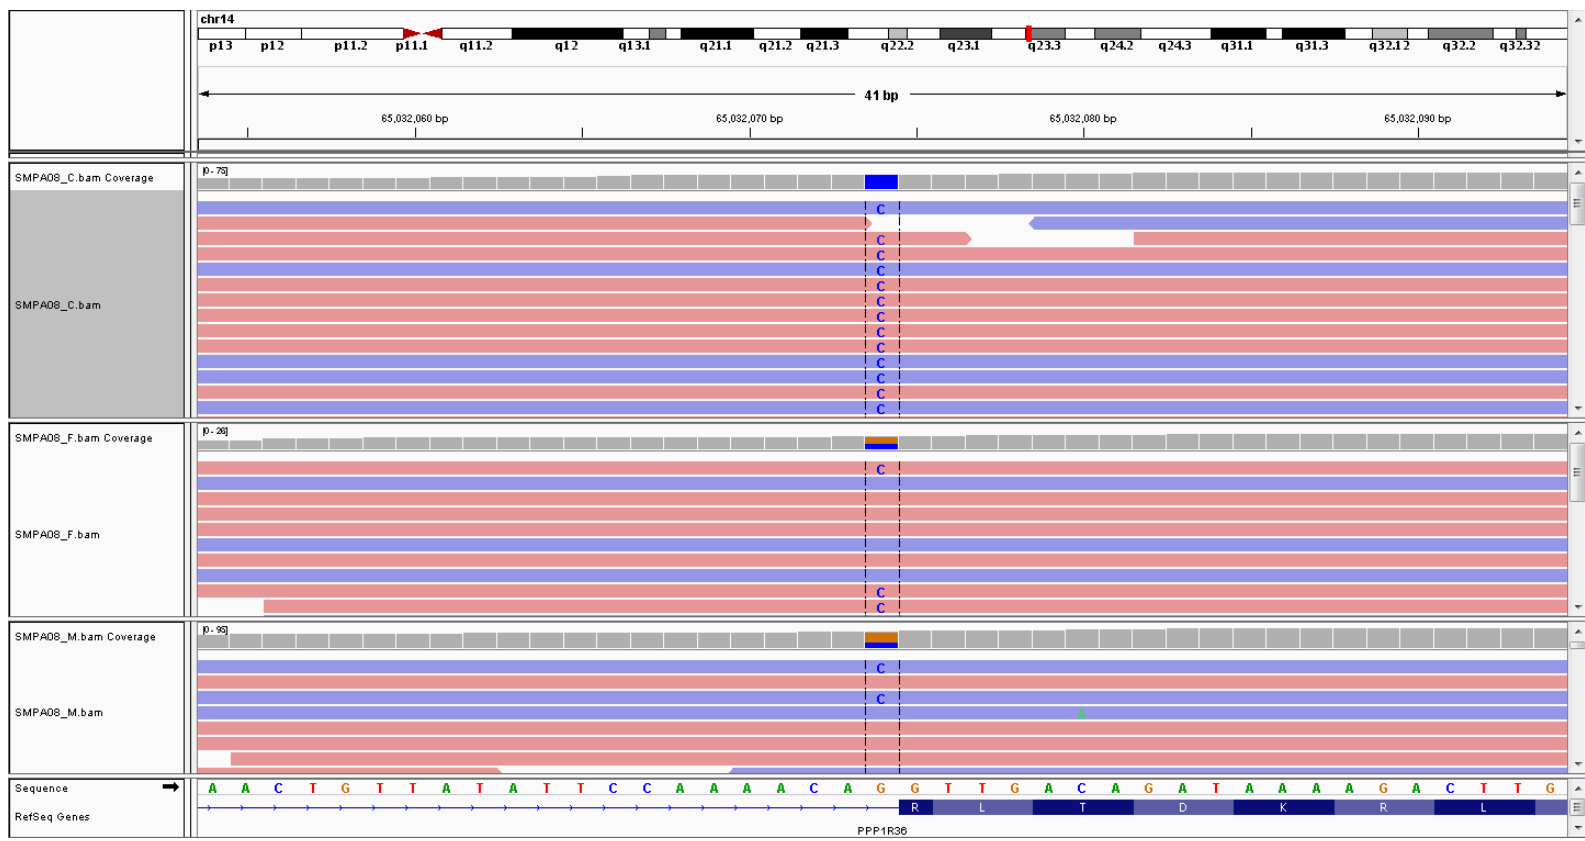

Proband

Father

Mother

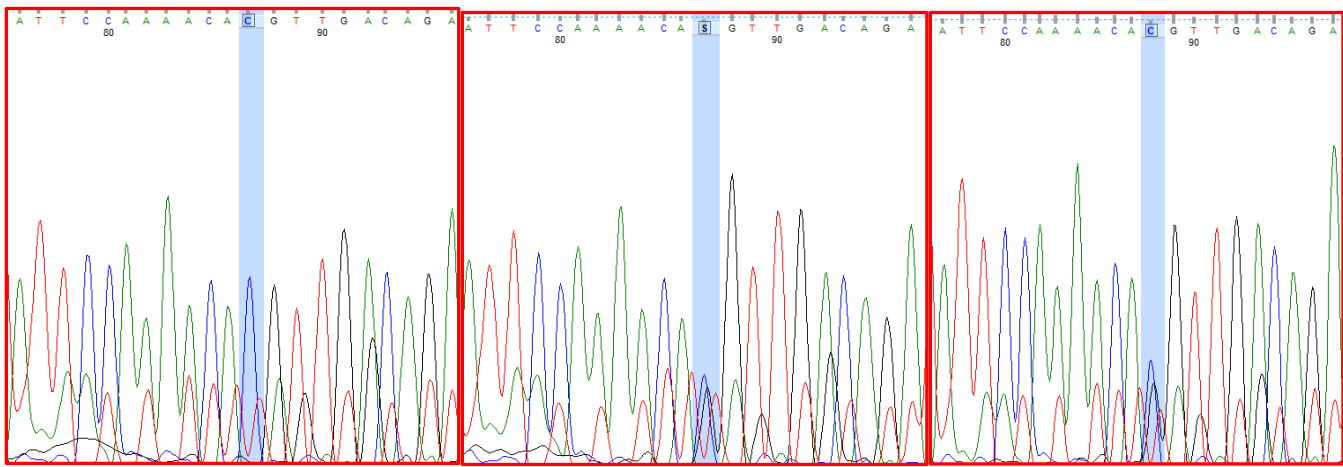

Proband

Father

Mother

39. IAH2: *TECPR2*

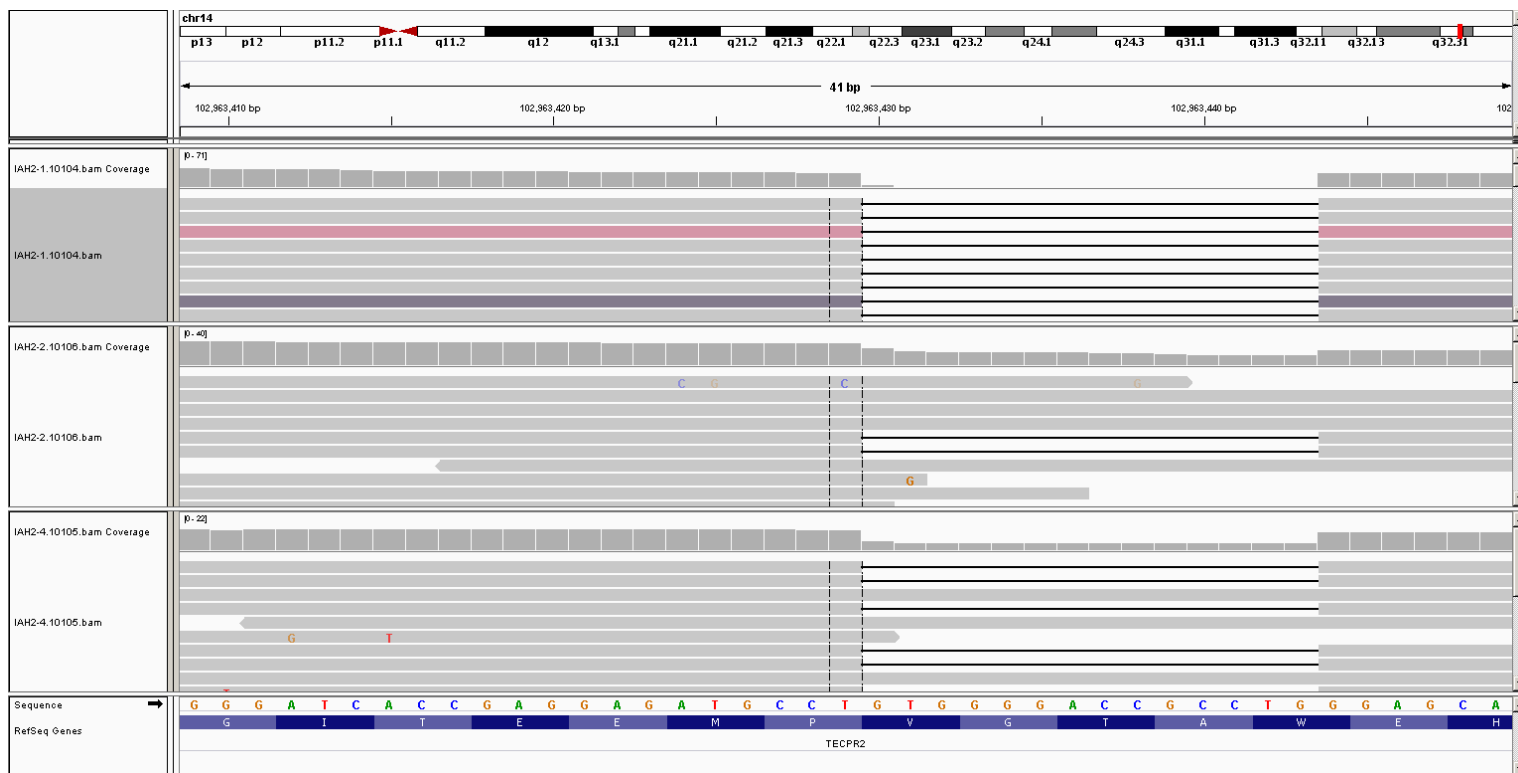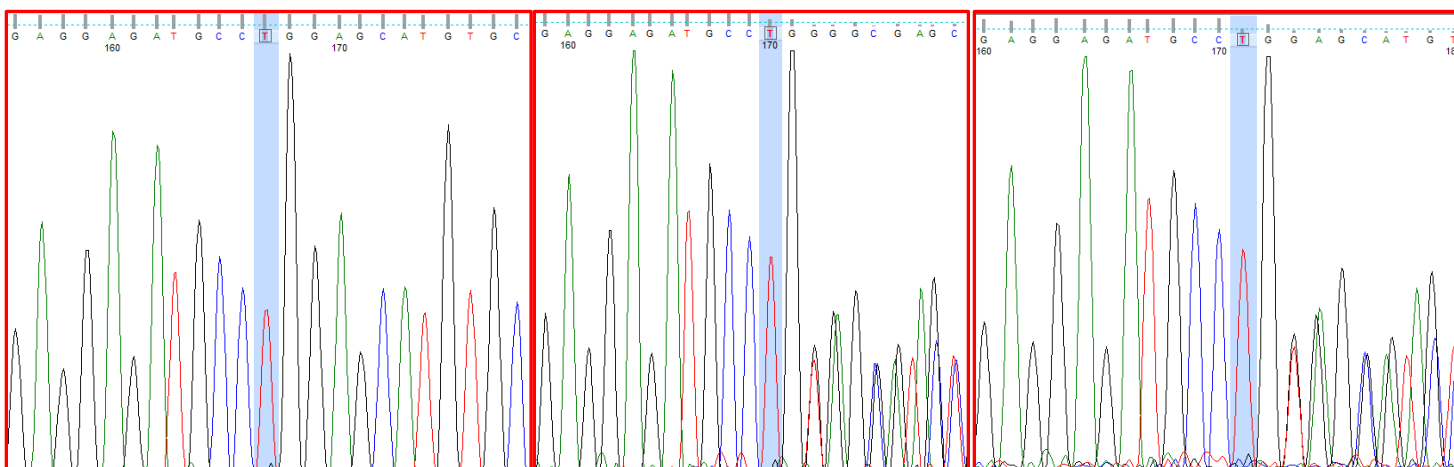

Proband

Father

Mother

40. IABB4: *LINS1*

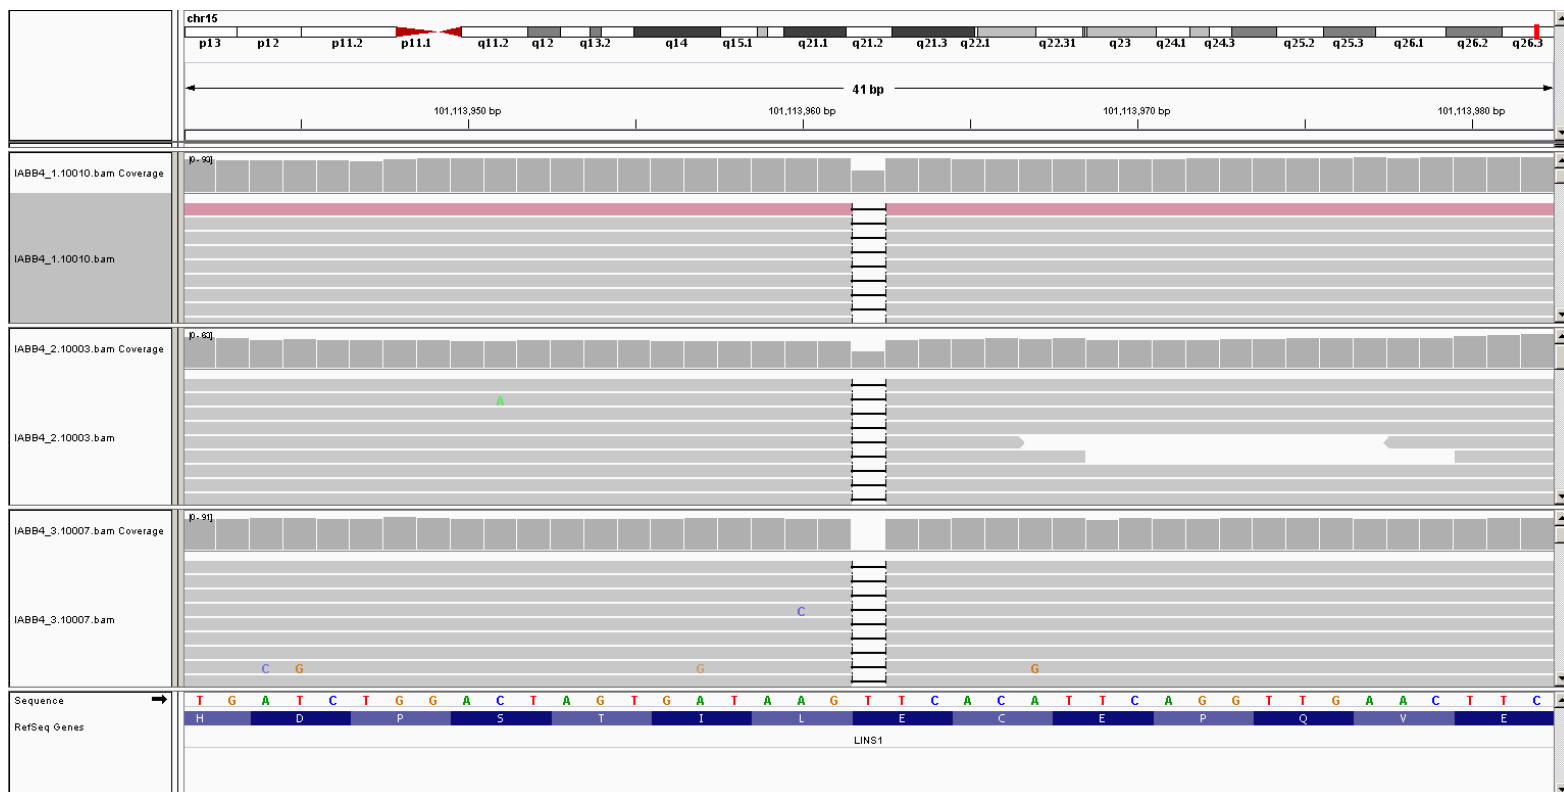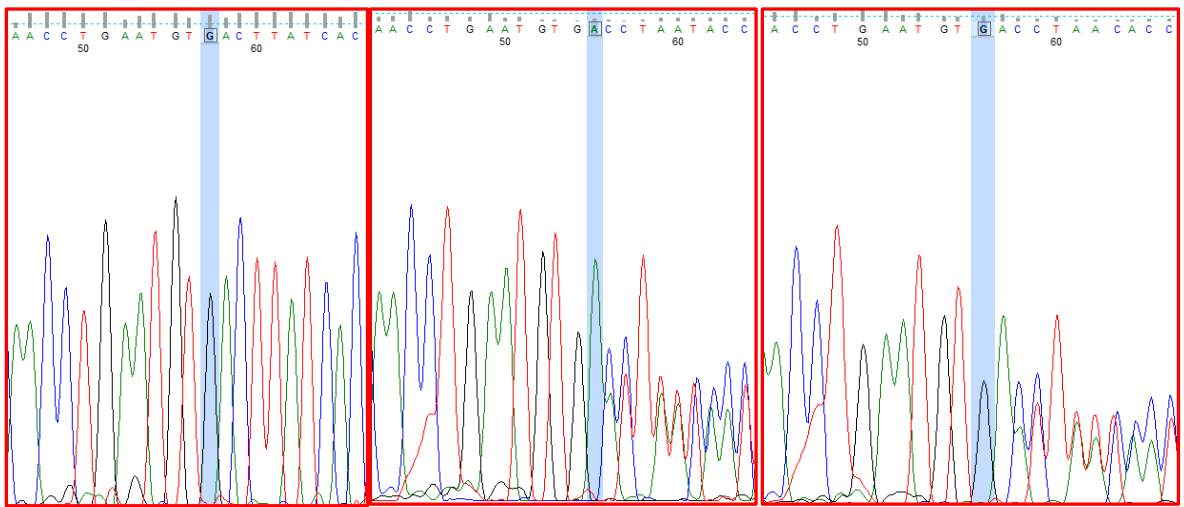

Proband

Father

Mother



41. SMPA76: WDR90

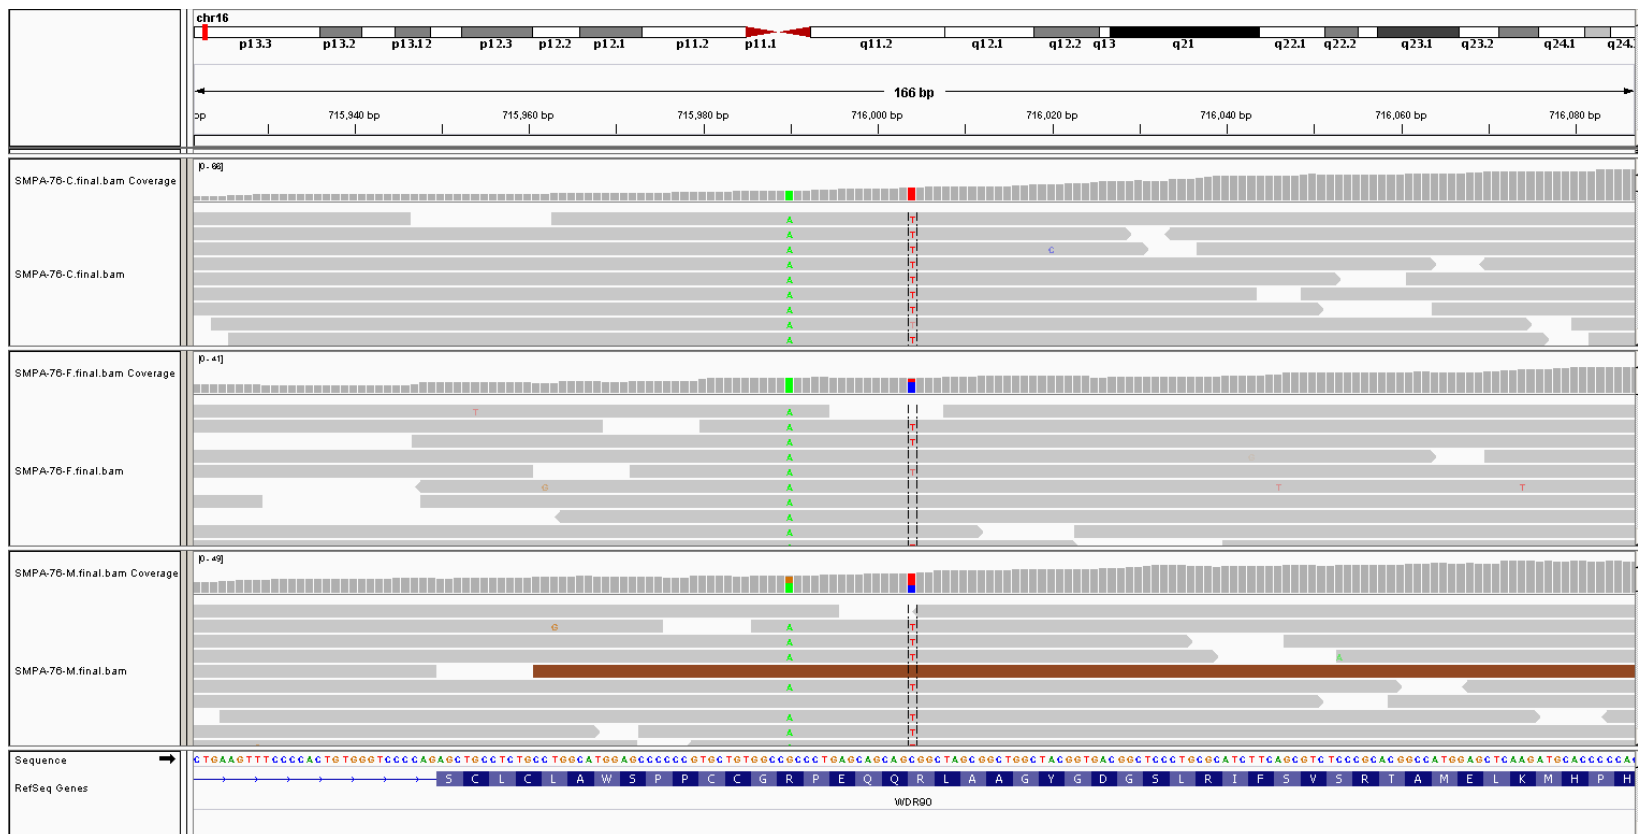

Proband

Father

Mother

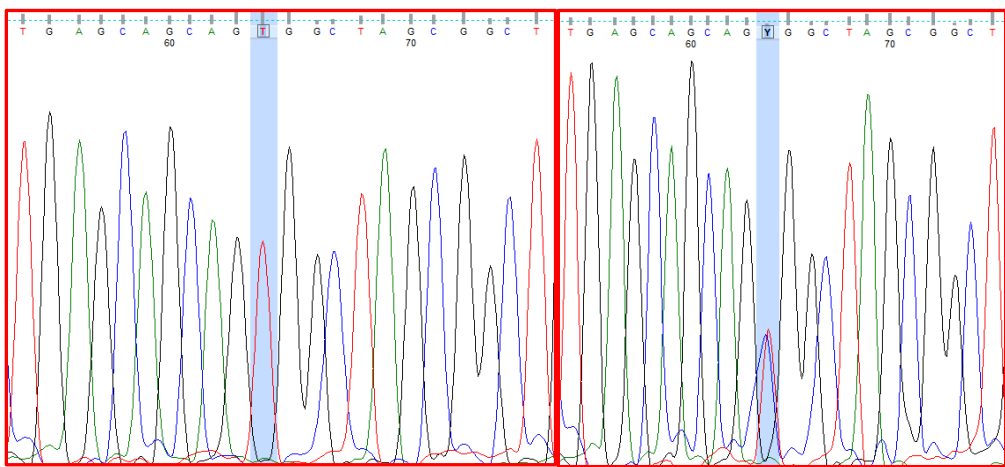

Proband

Father

42. IABB14: ASPA

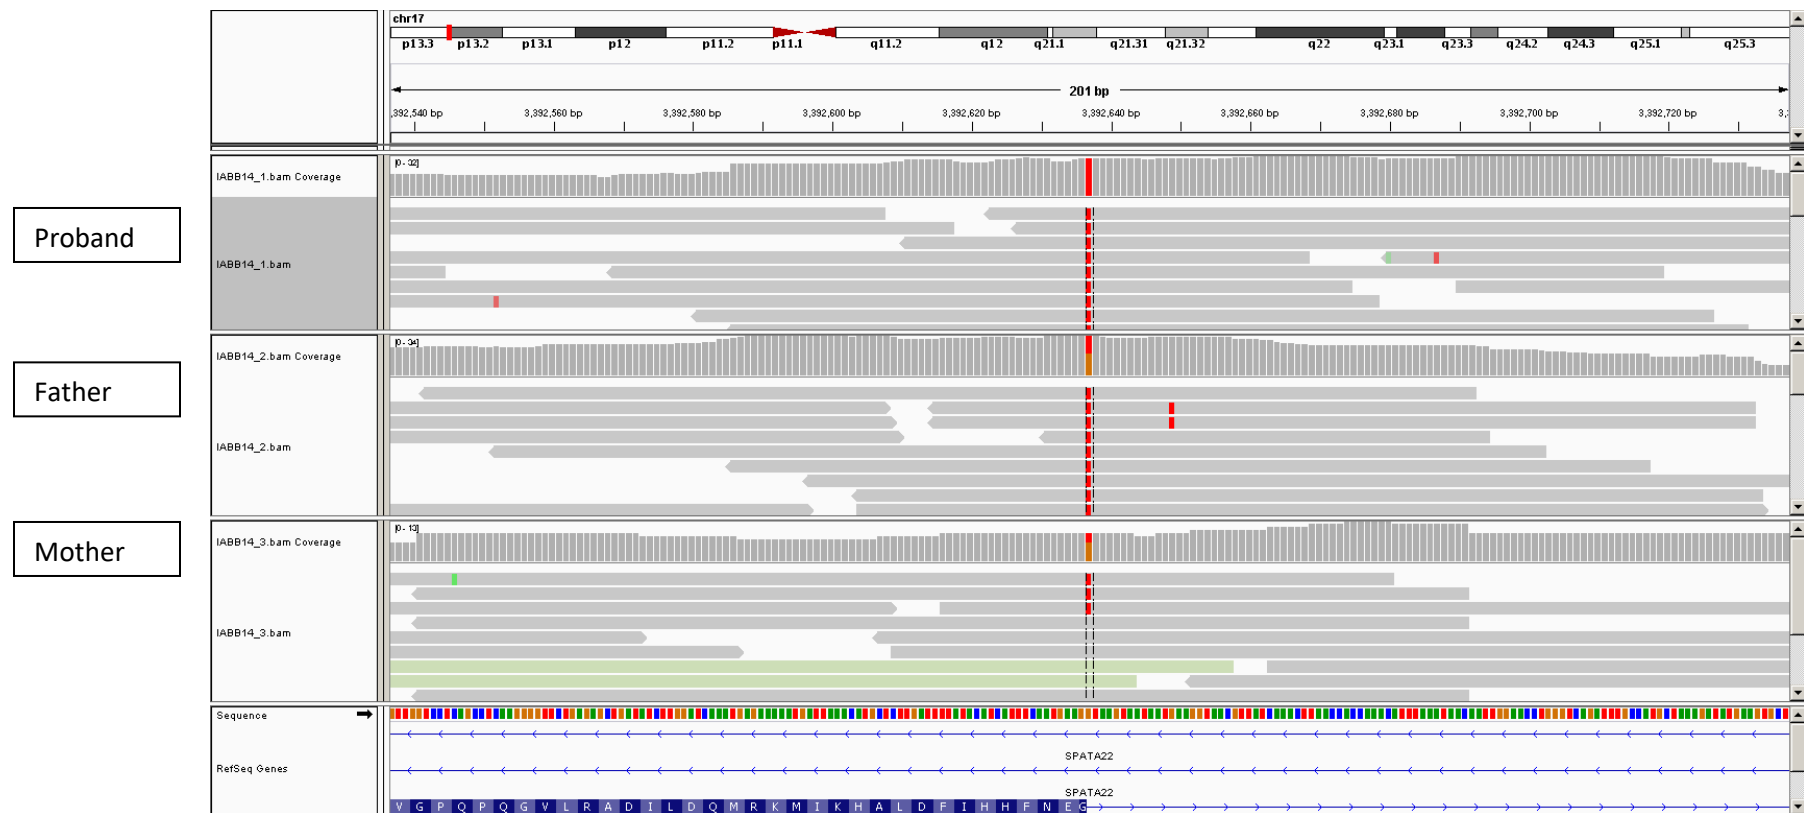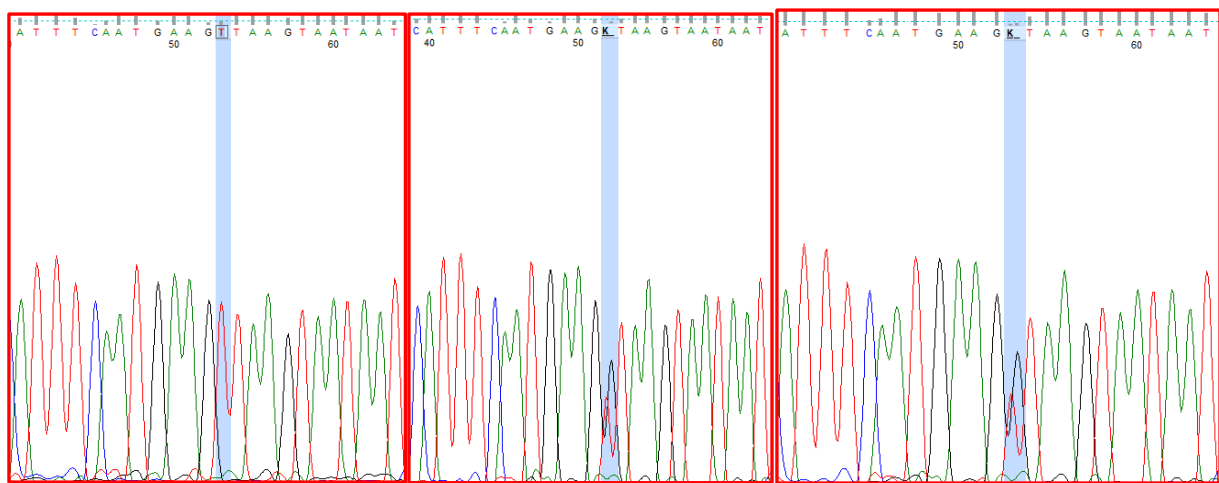

Proband

Father

Mother

43. SA2: CC2D1A

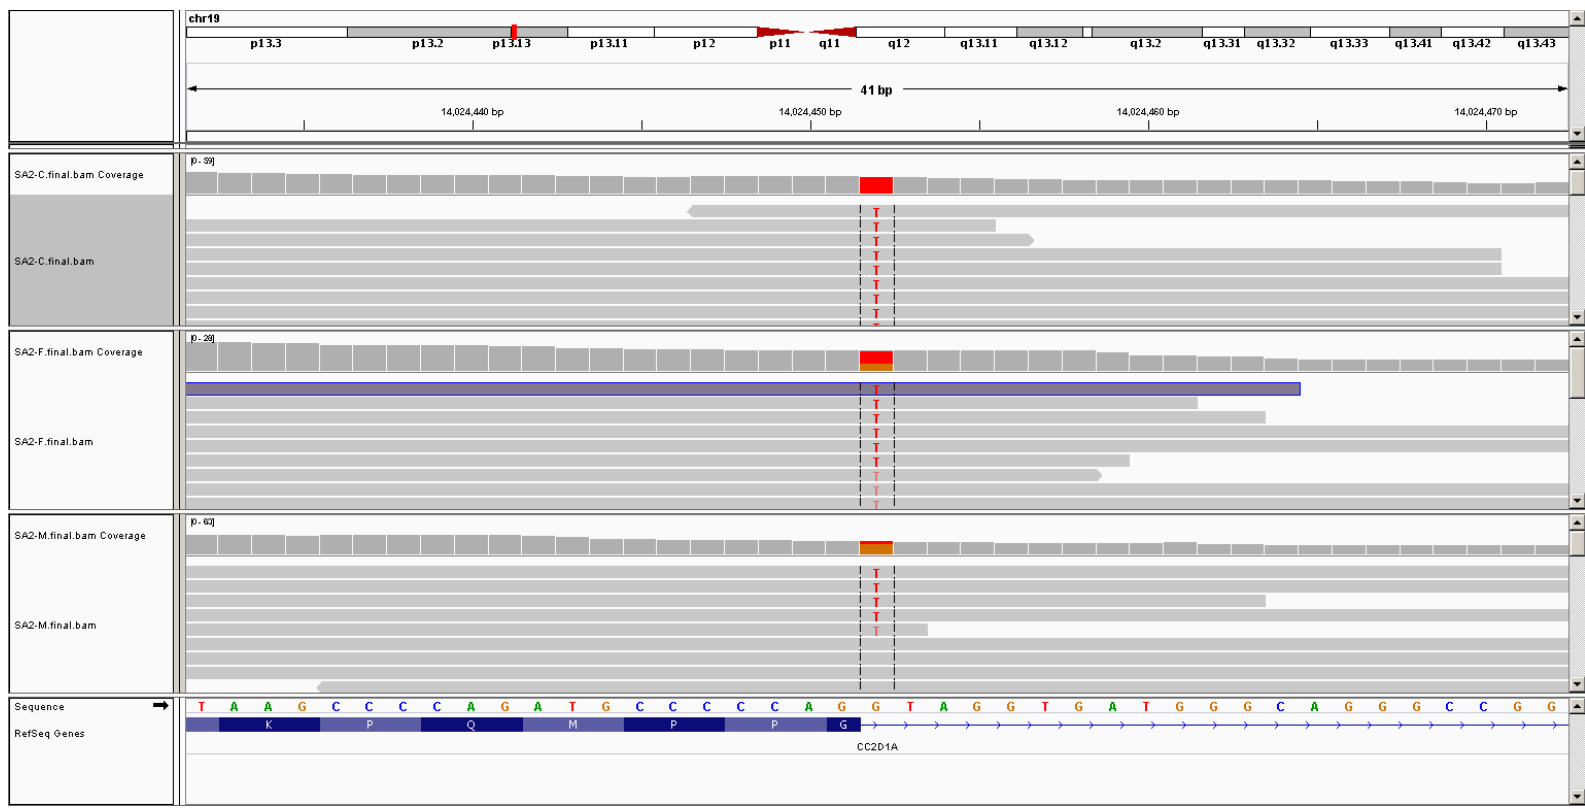

Proband

Father

Mother

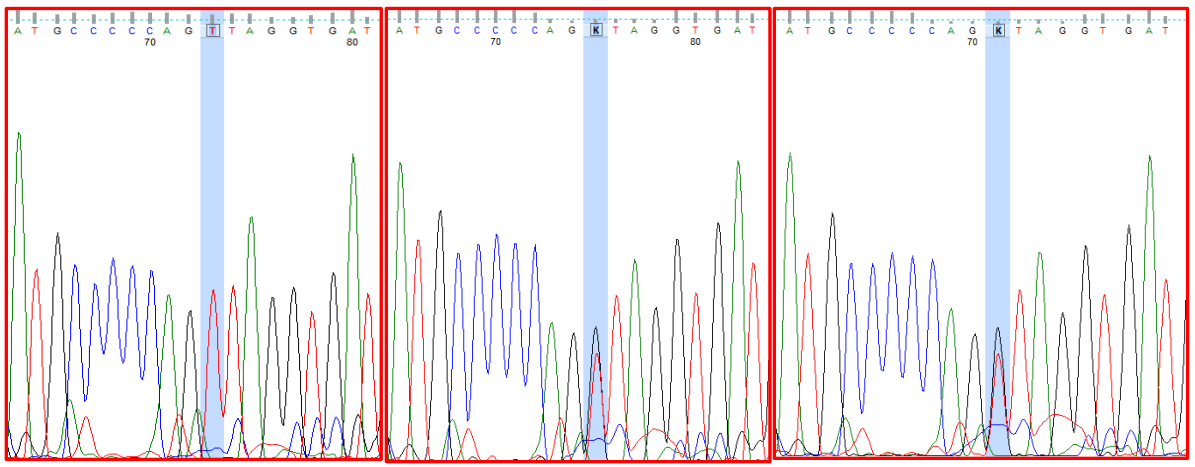

Proband

Father

Mother

44. IABB16: MED25

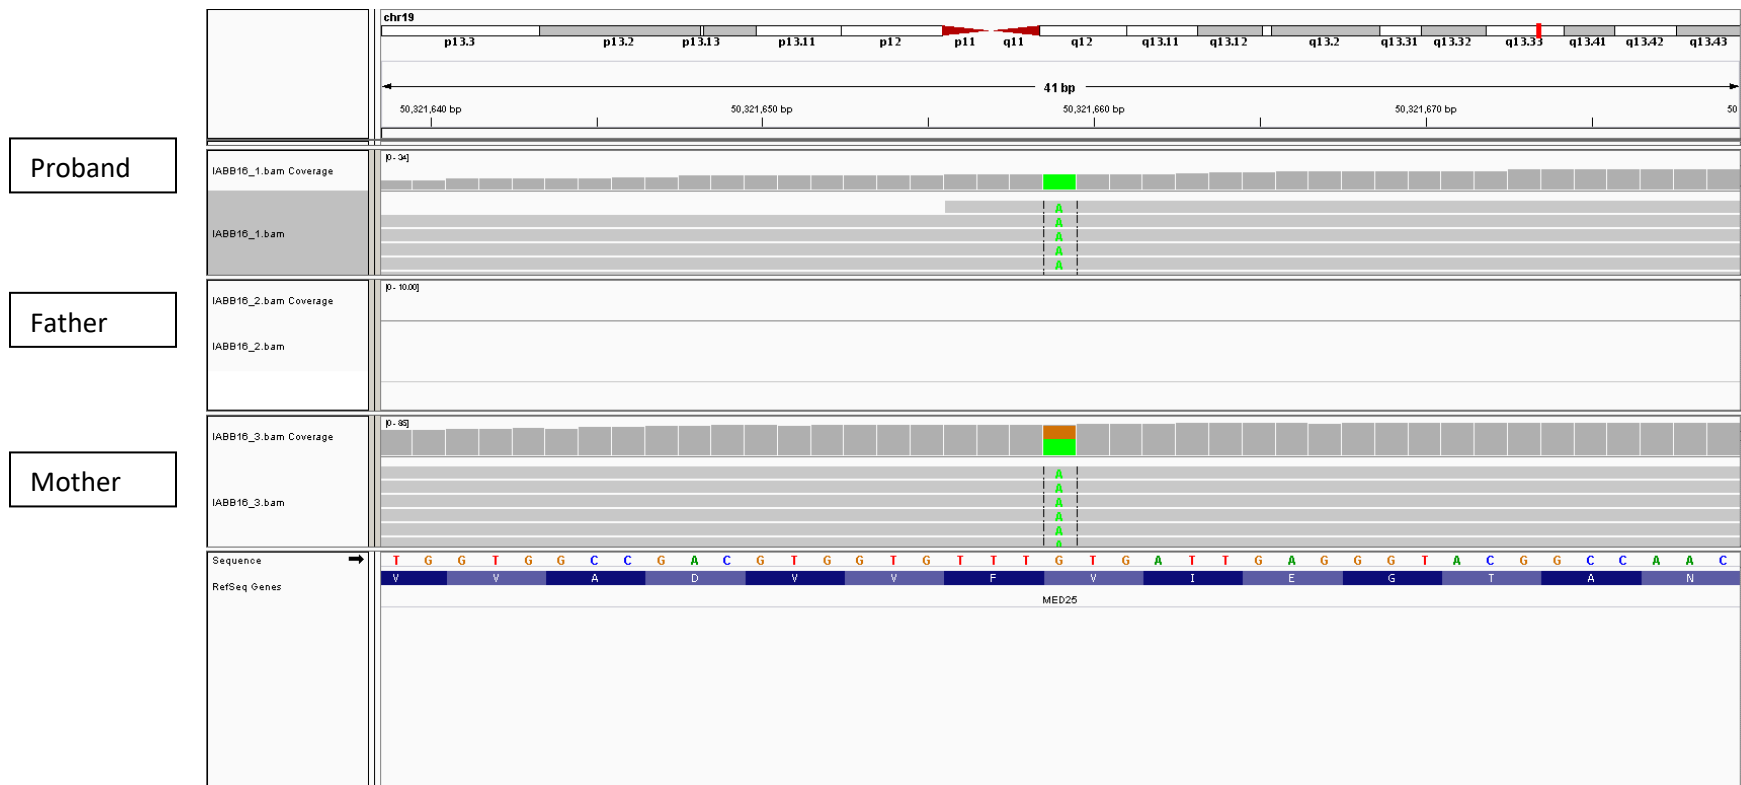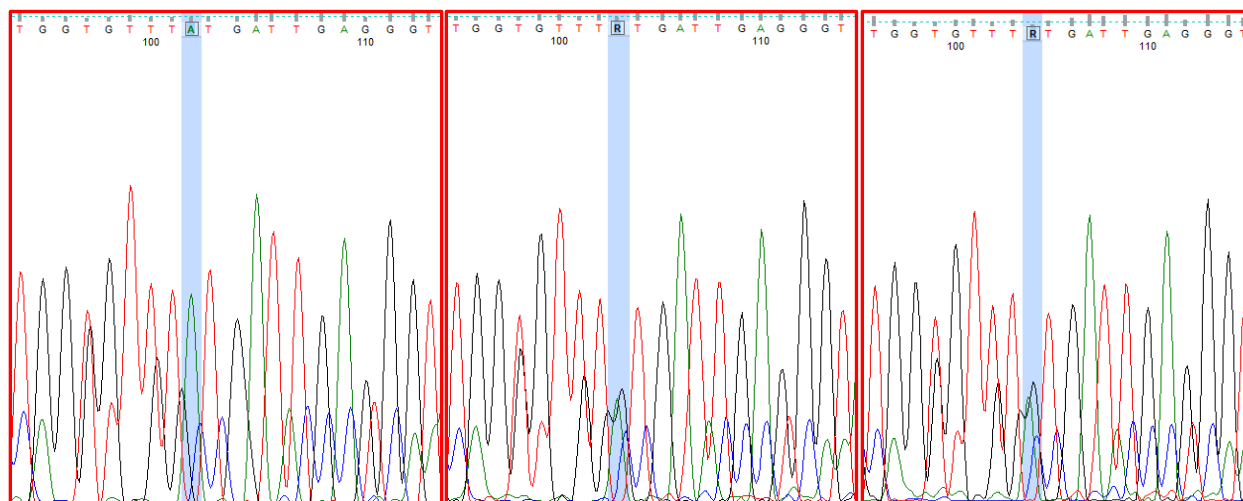

Proband

Father

Mother

45. SA11: ZNF766

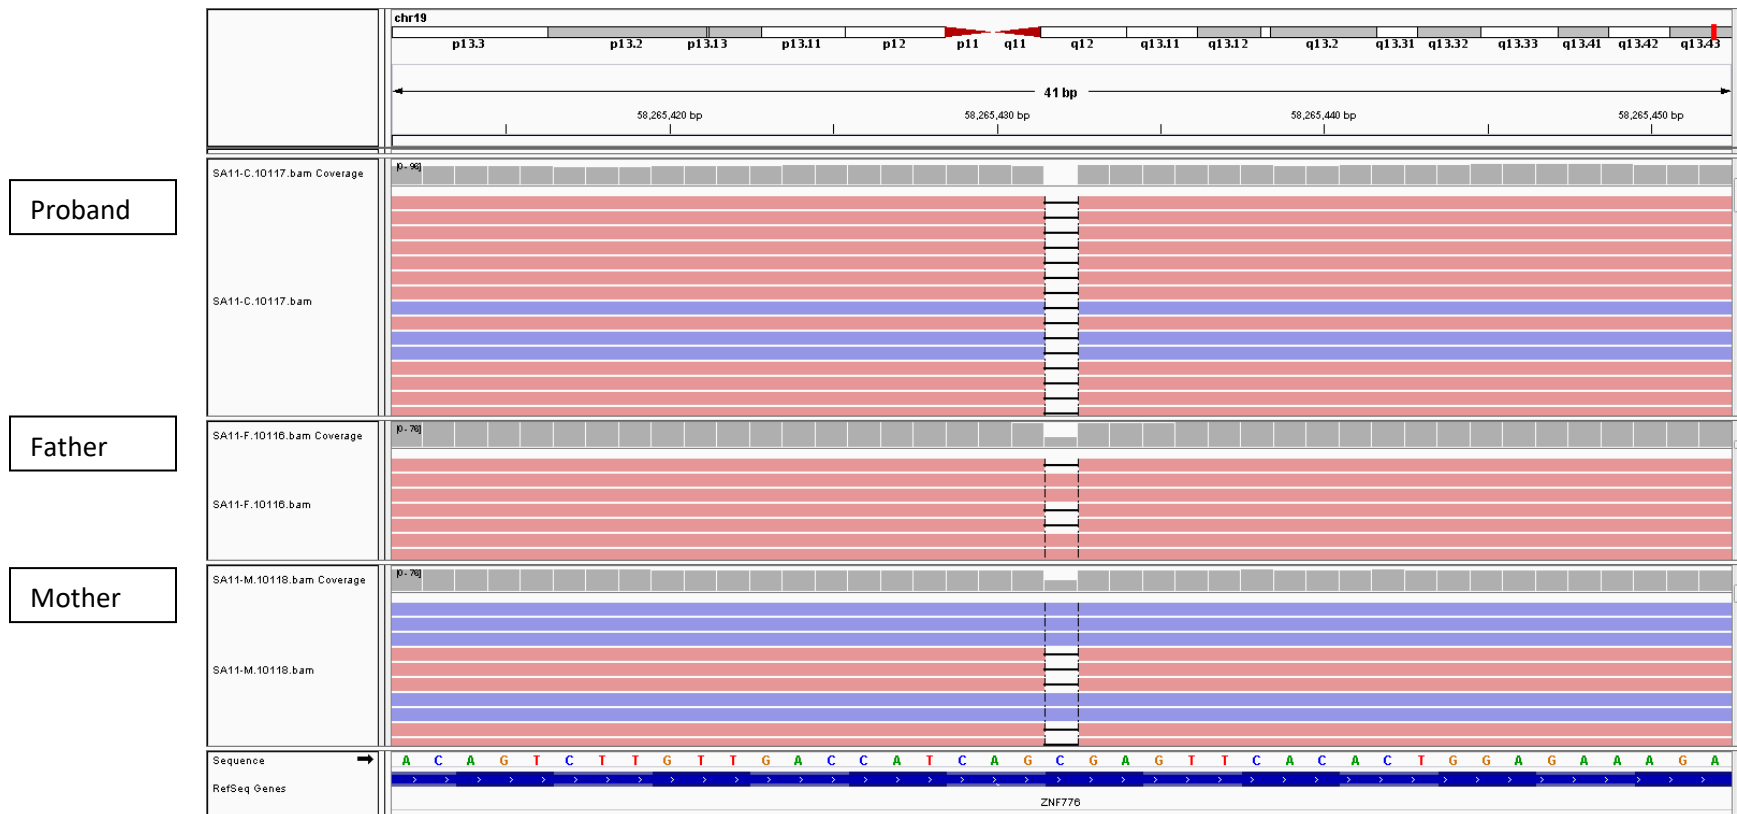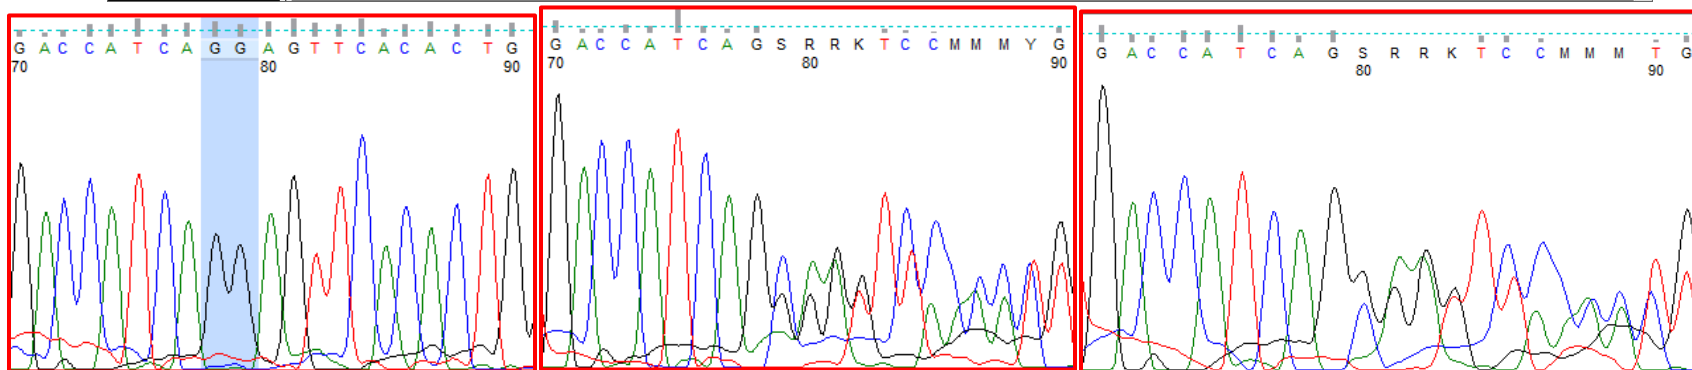

Proband

Father

Mother

46. IABB16: VPS16

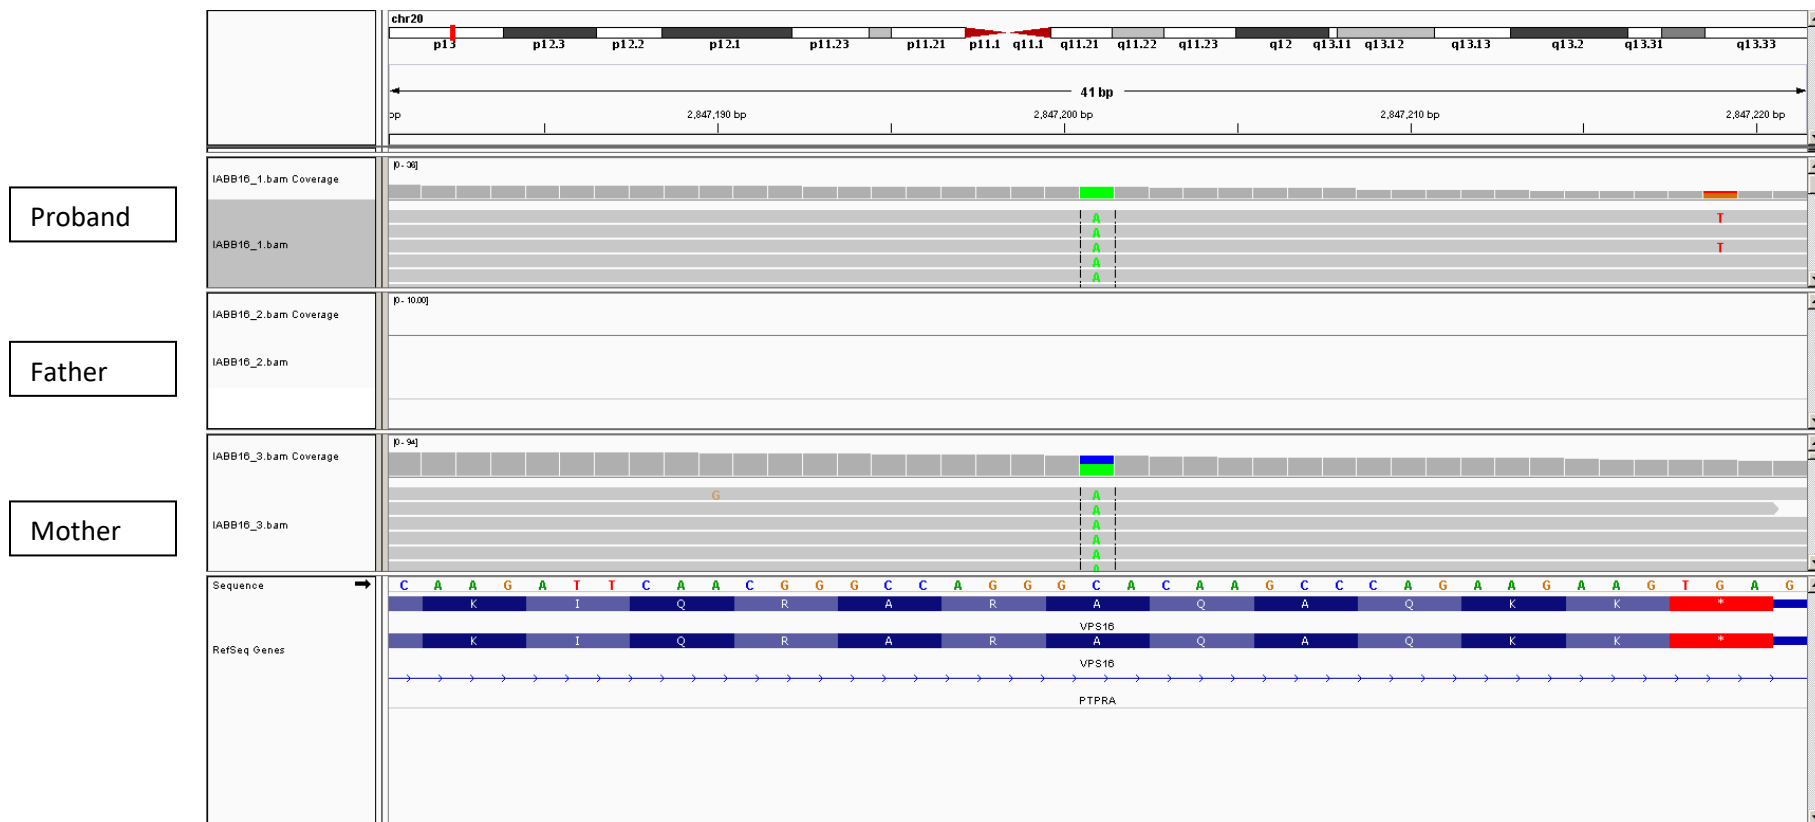

Proband

Father

Mother

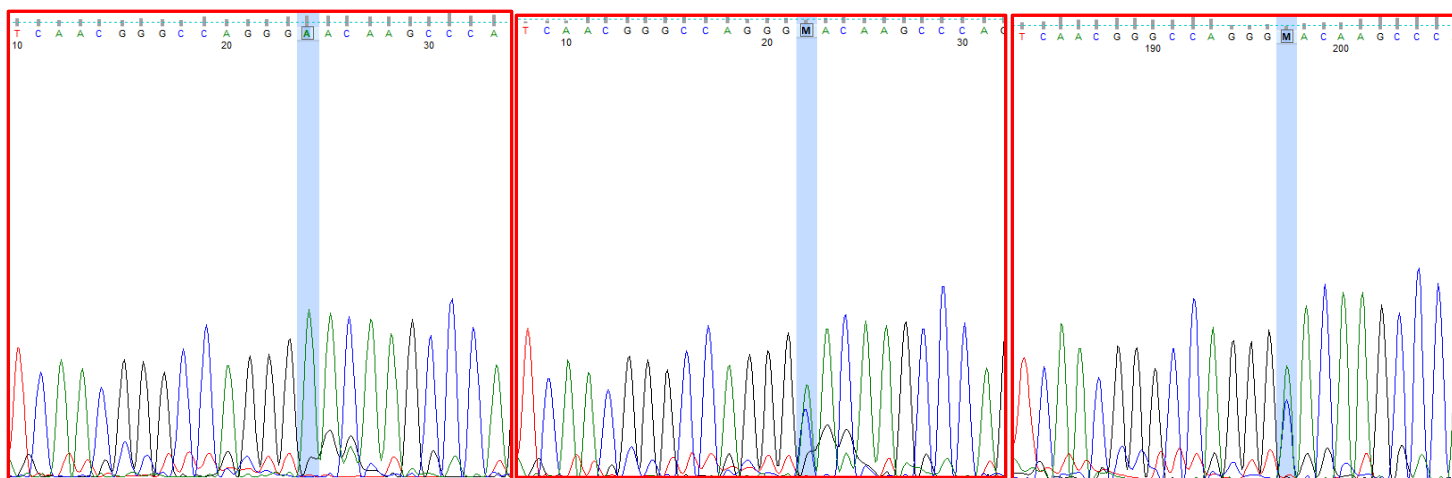

Proband

Father

Mother

47. IABB16: *KIF16B*

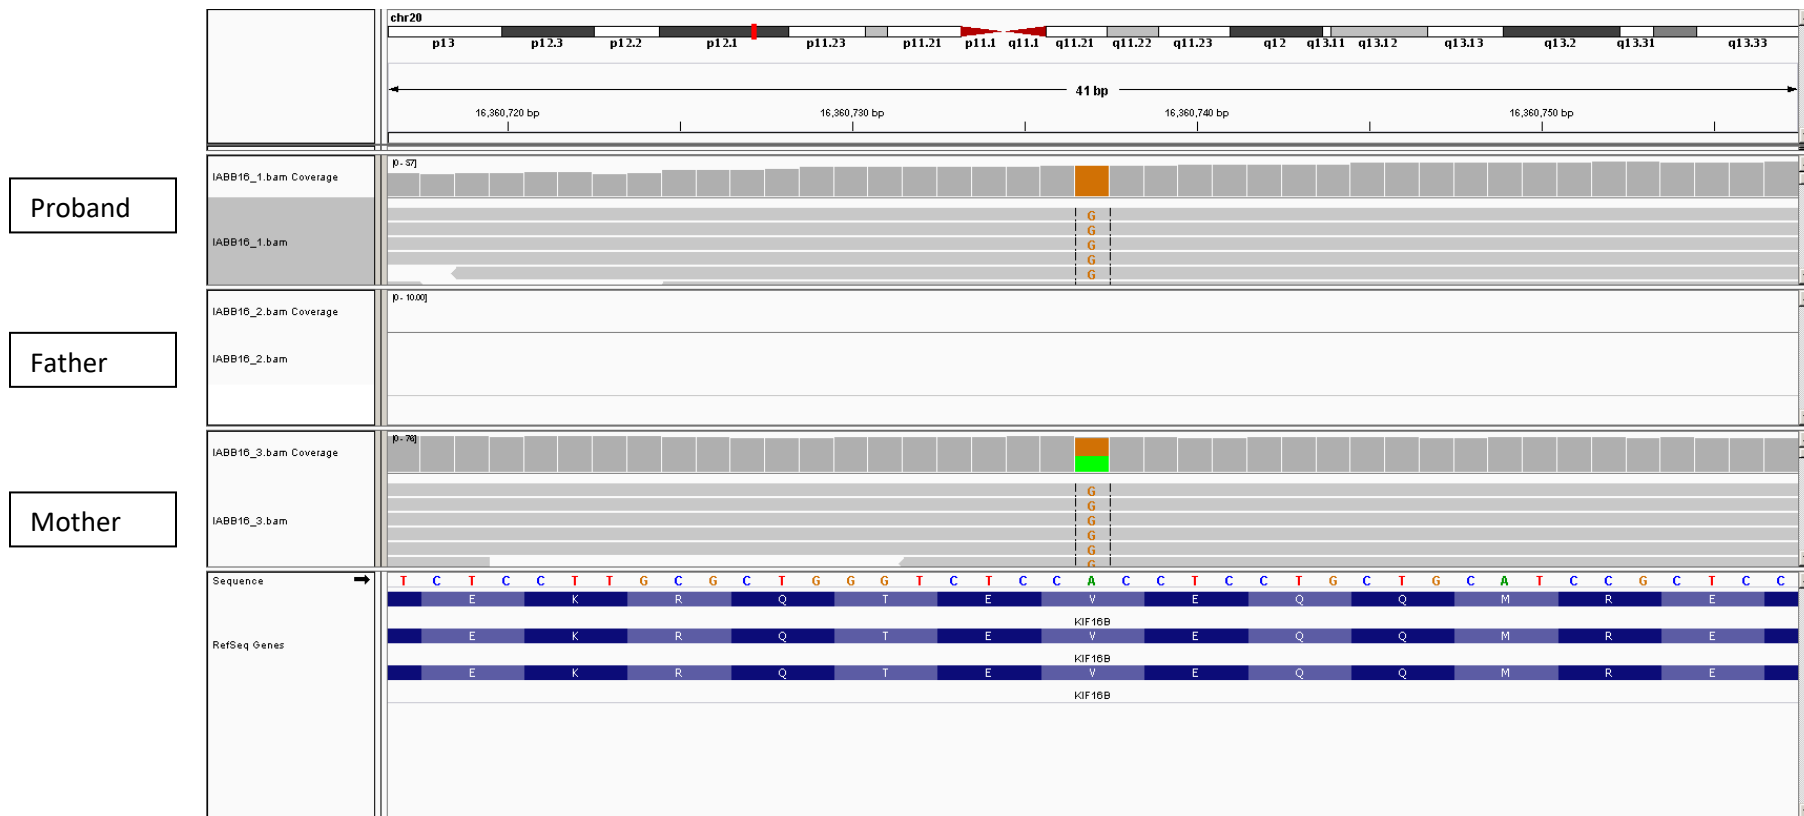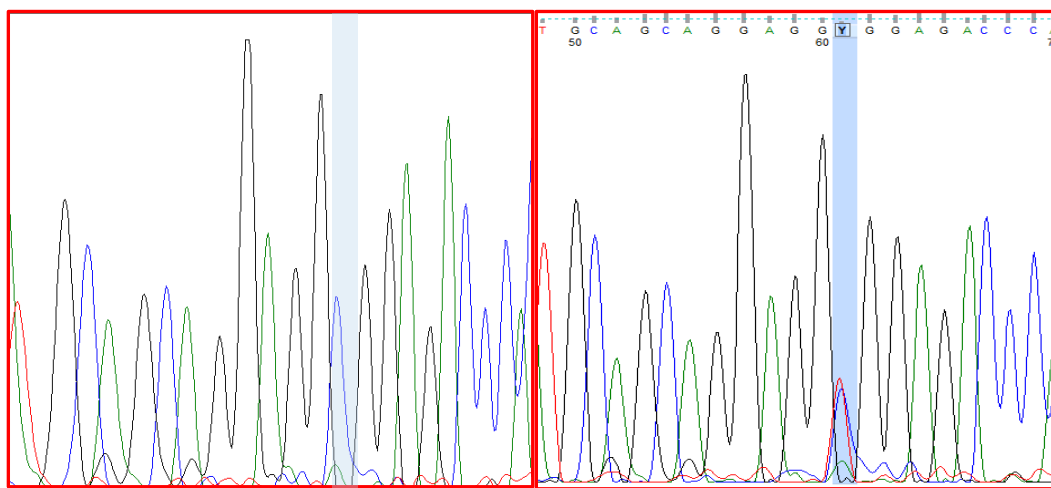

Proband

Mother

48. IABB5: ZNF335

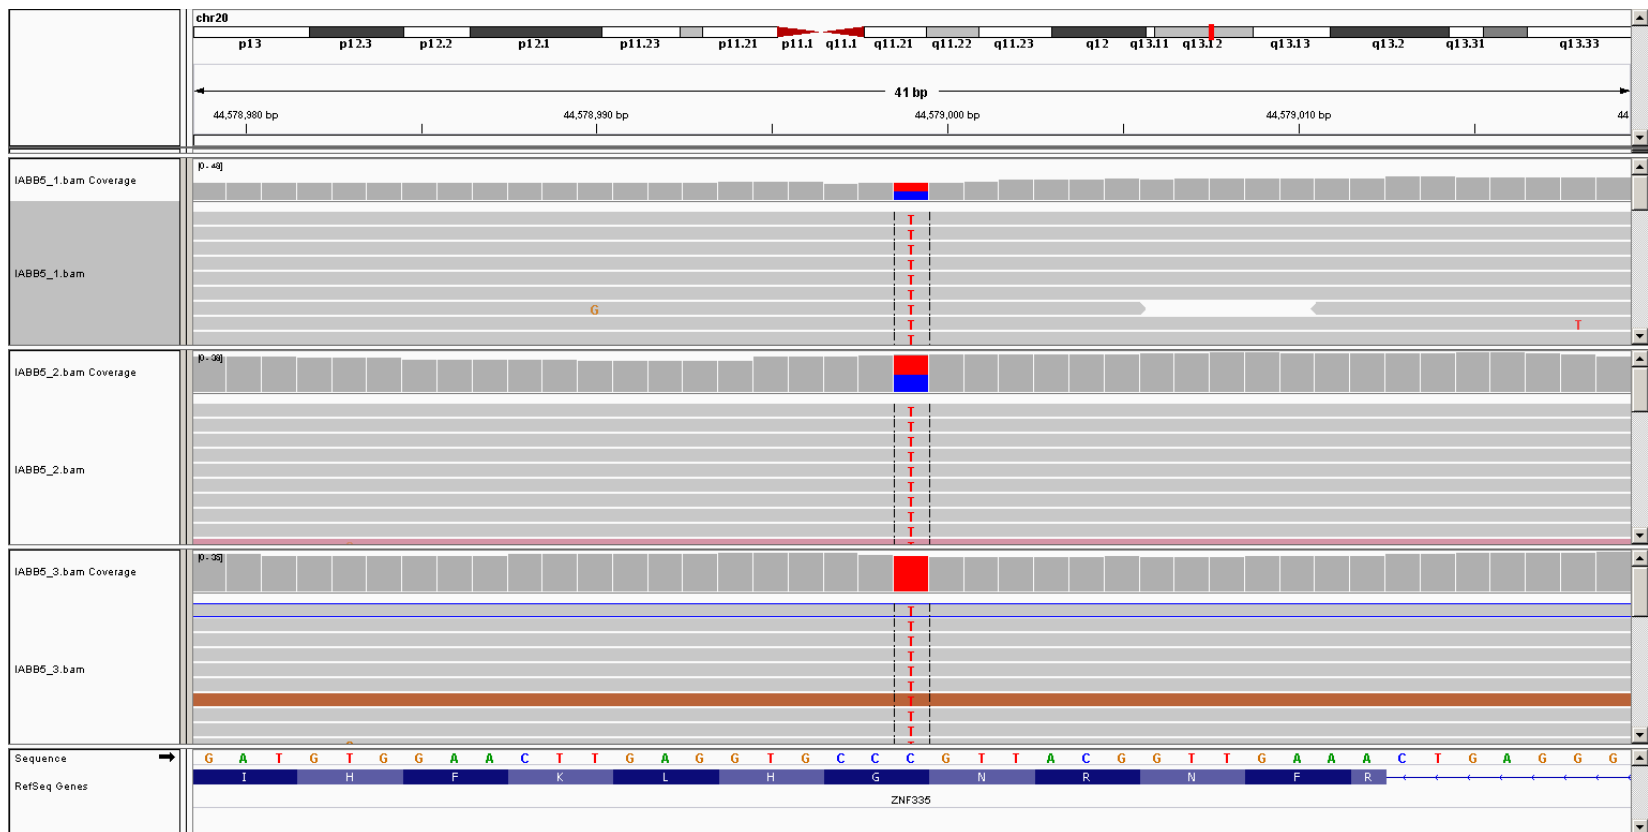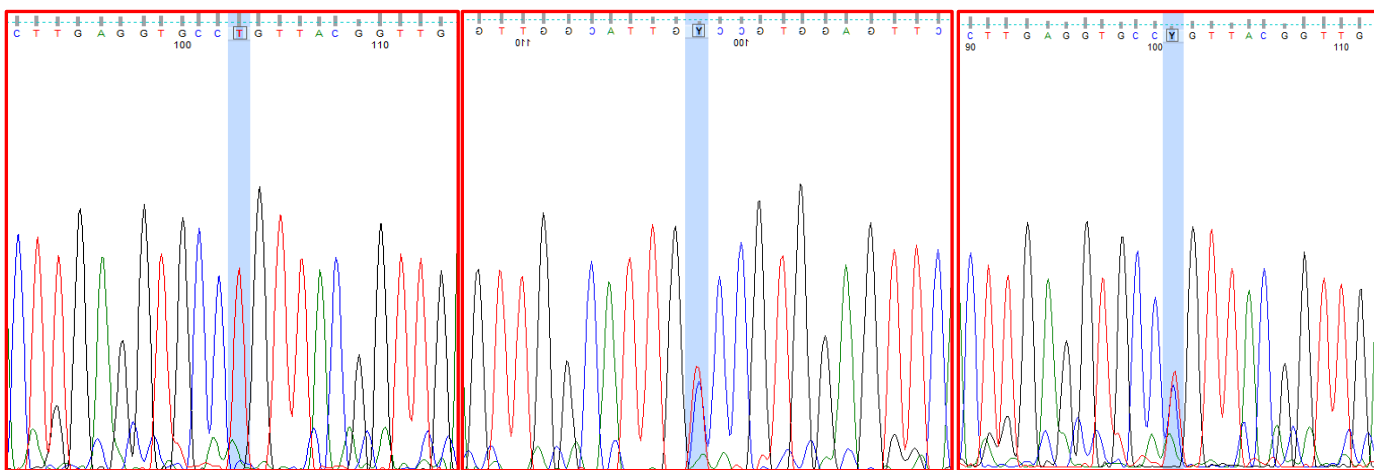

Proband

Father

Mother



49. IABB11: *SGSM3*

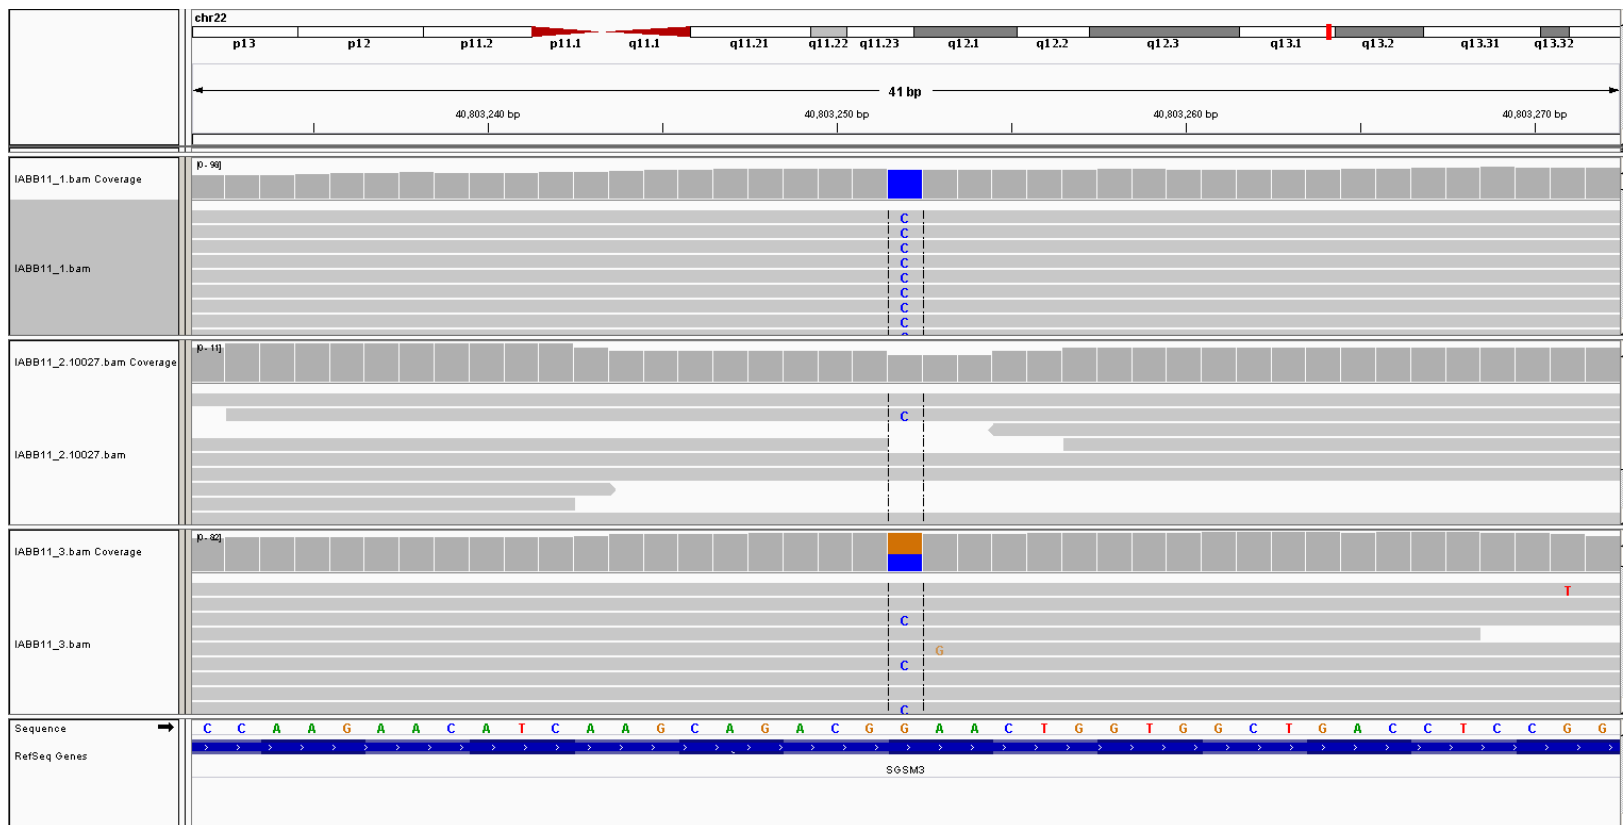

Proband

Father

Mother

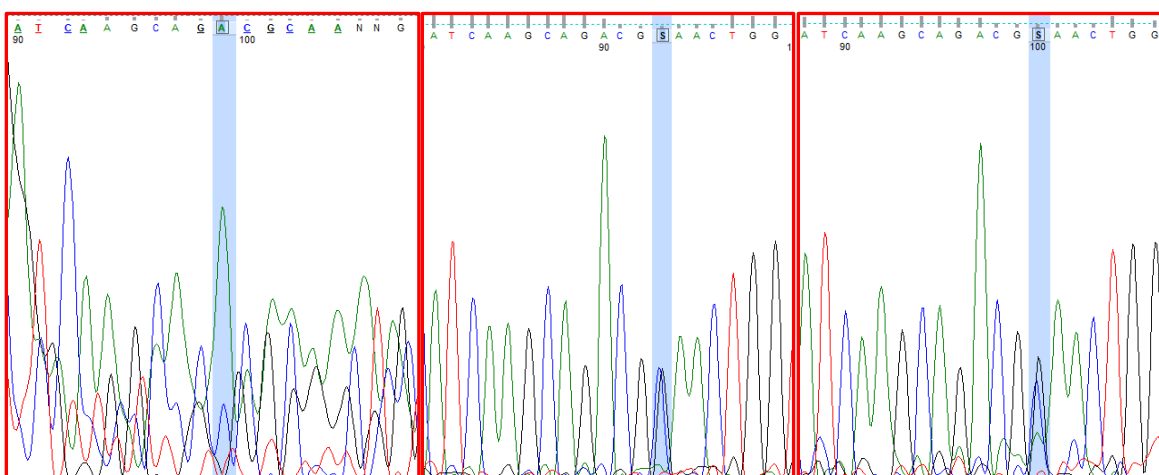

Proband

Father

Mother

**Table 3: De novo/dominant**

1. RQPA20: *RAB42*

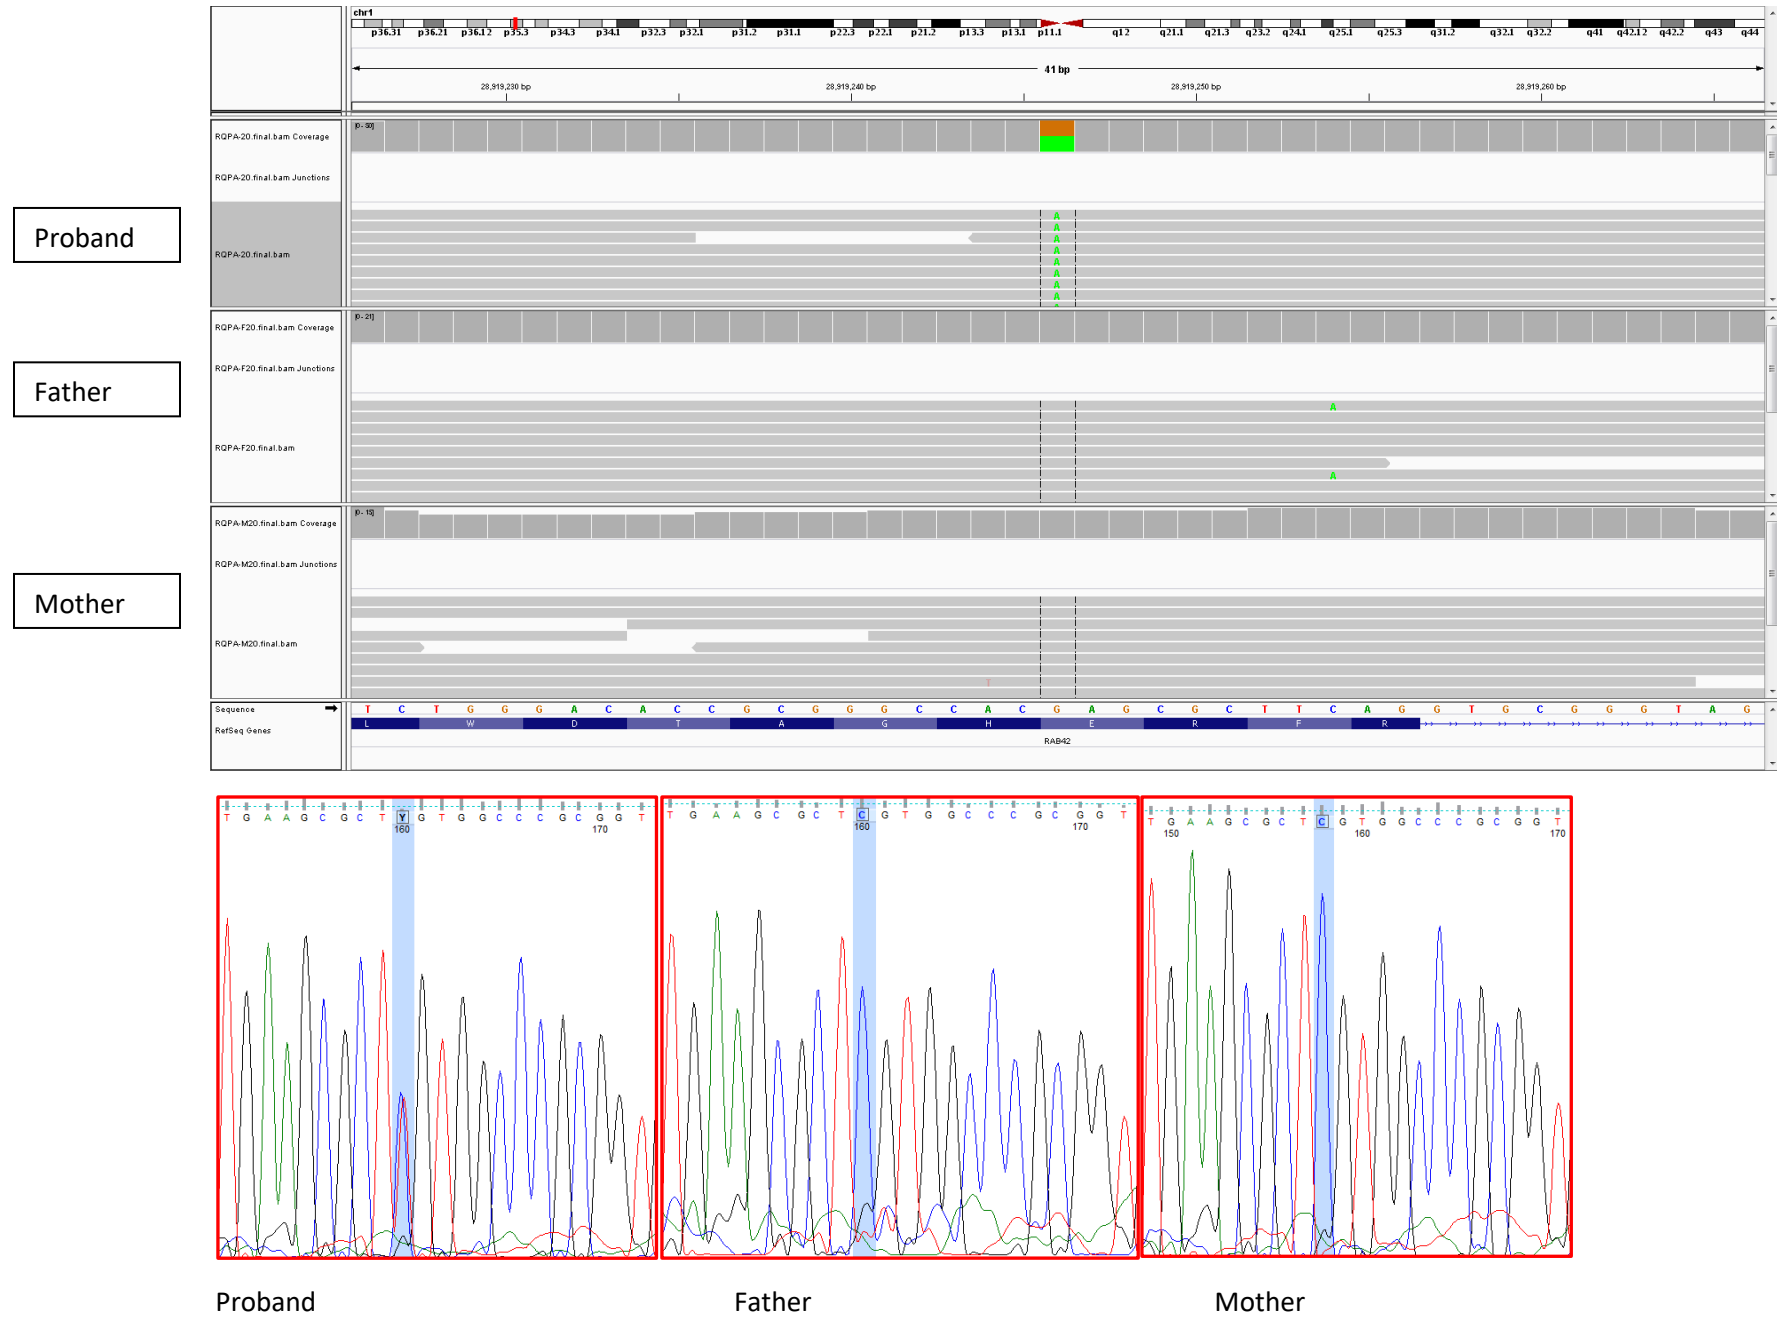

## 2. RQPA20: *TMIGD3*

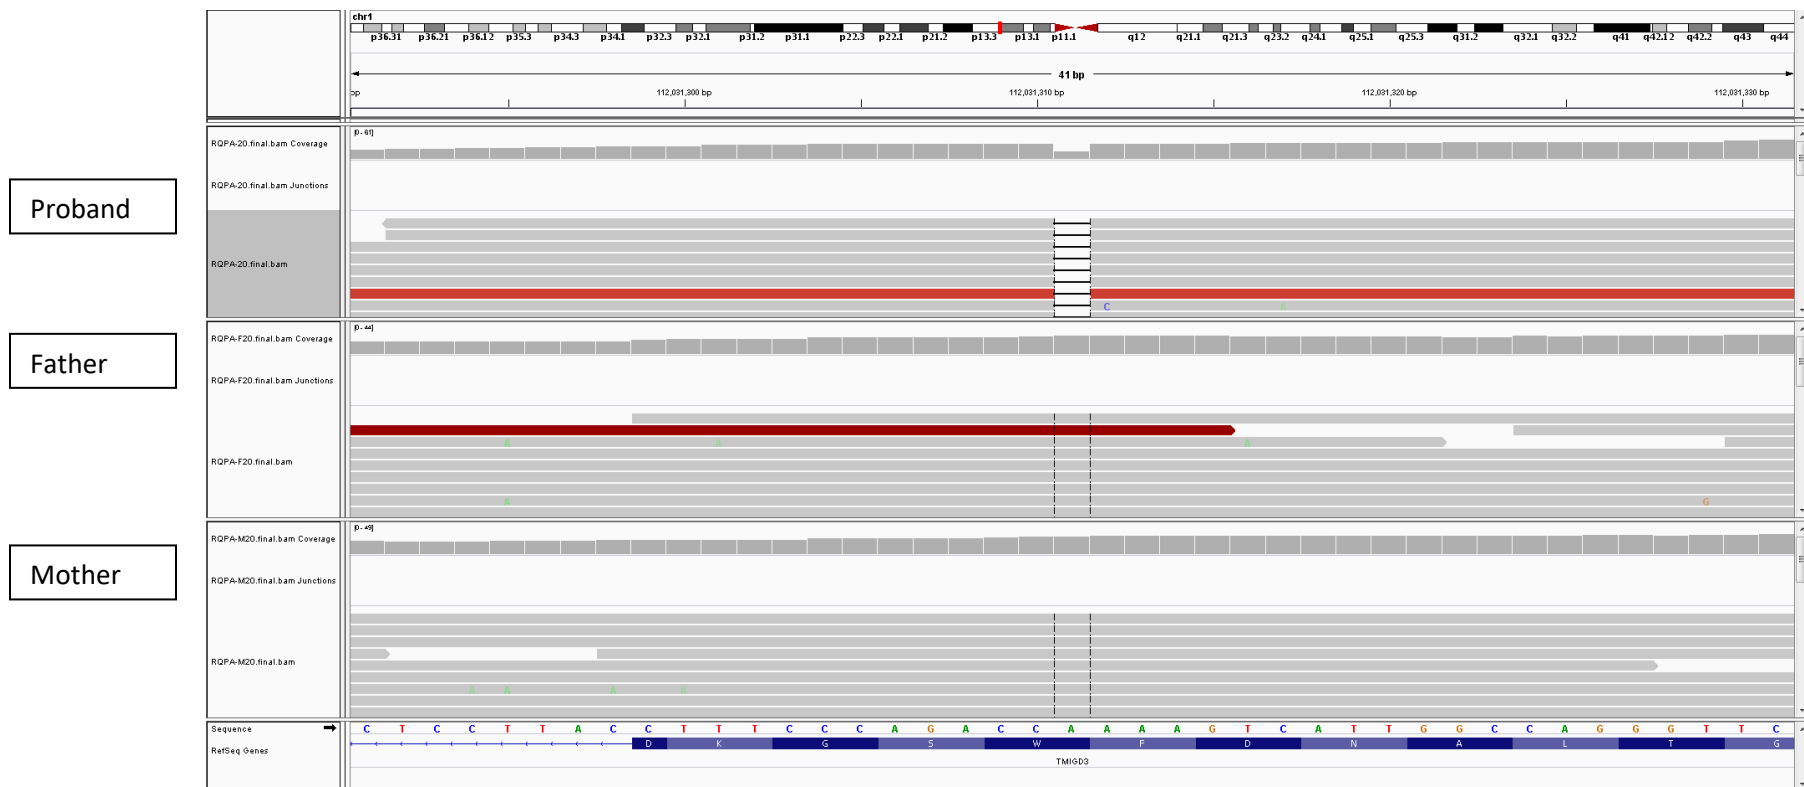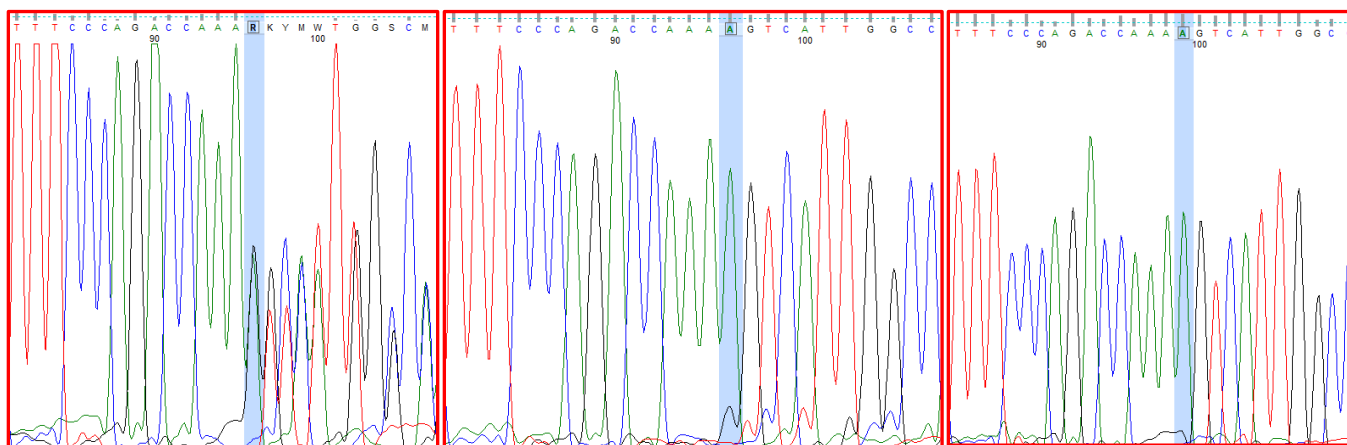

Proband

Father

Mother

### 3. RQPA20: ECM1

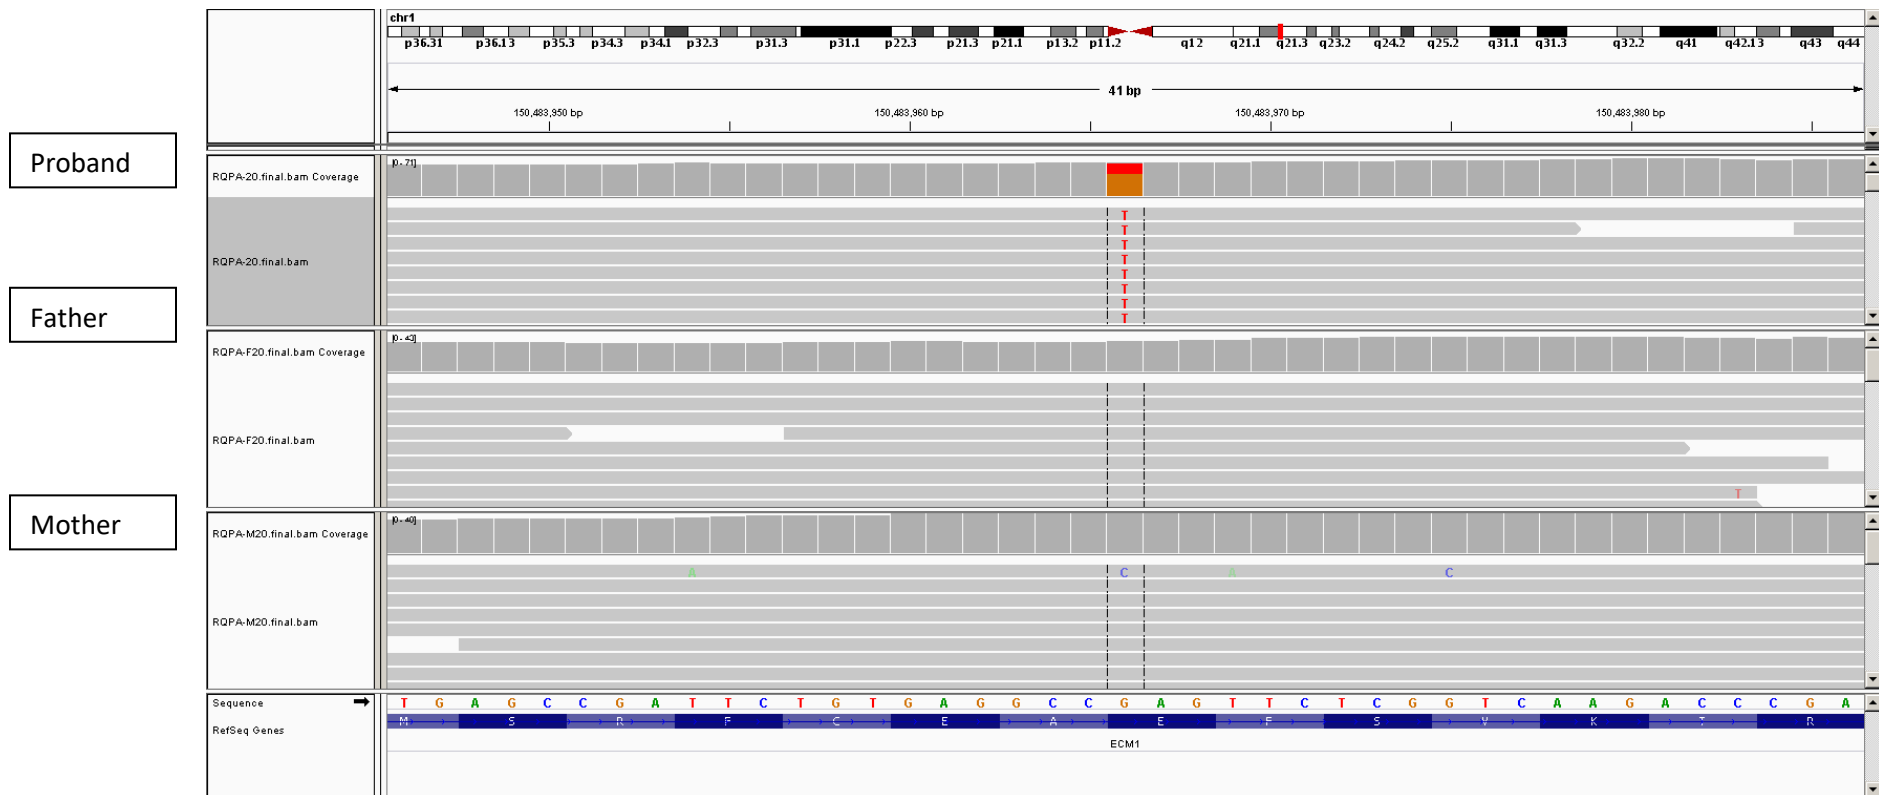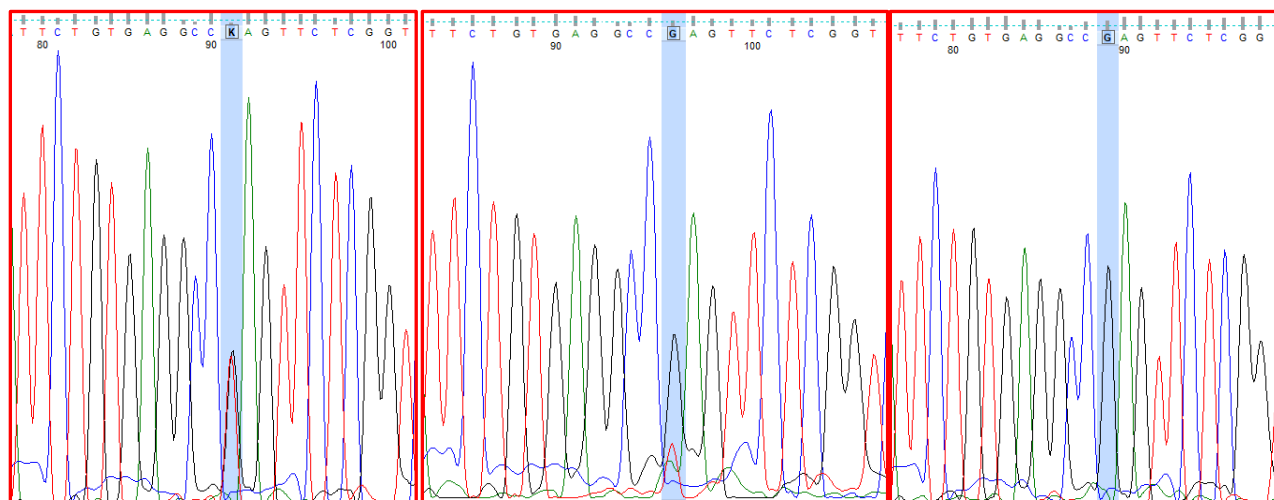

Proband

Father

Mother



5. IAU29: MYT1L

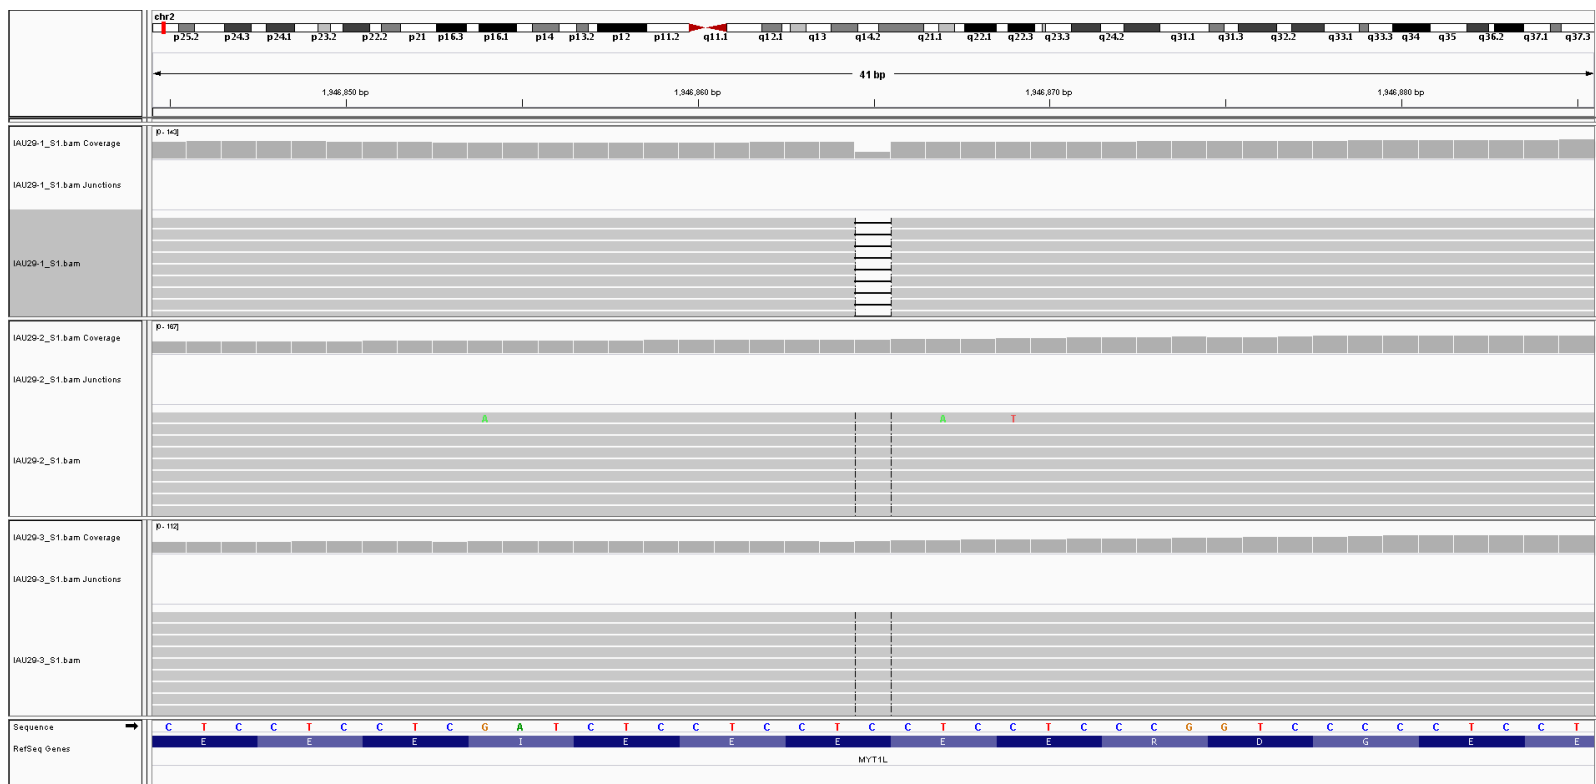

Proband

Father

Mother

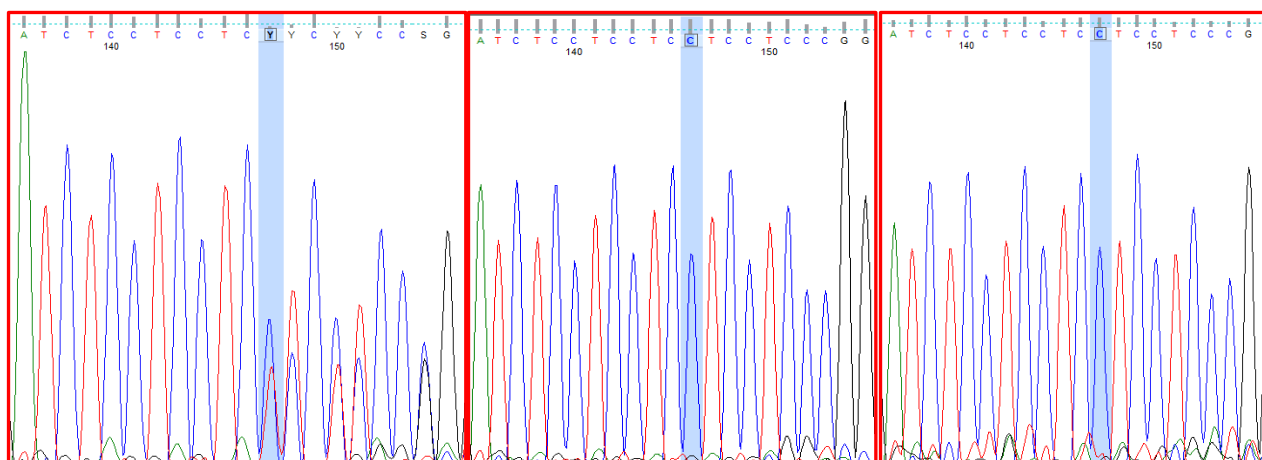

Proband

Father

Mother

## 6. SMPA53: SCN2A

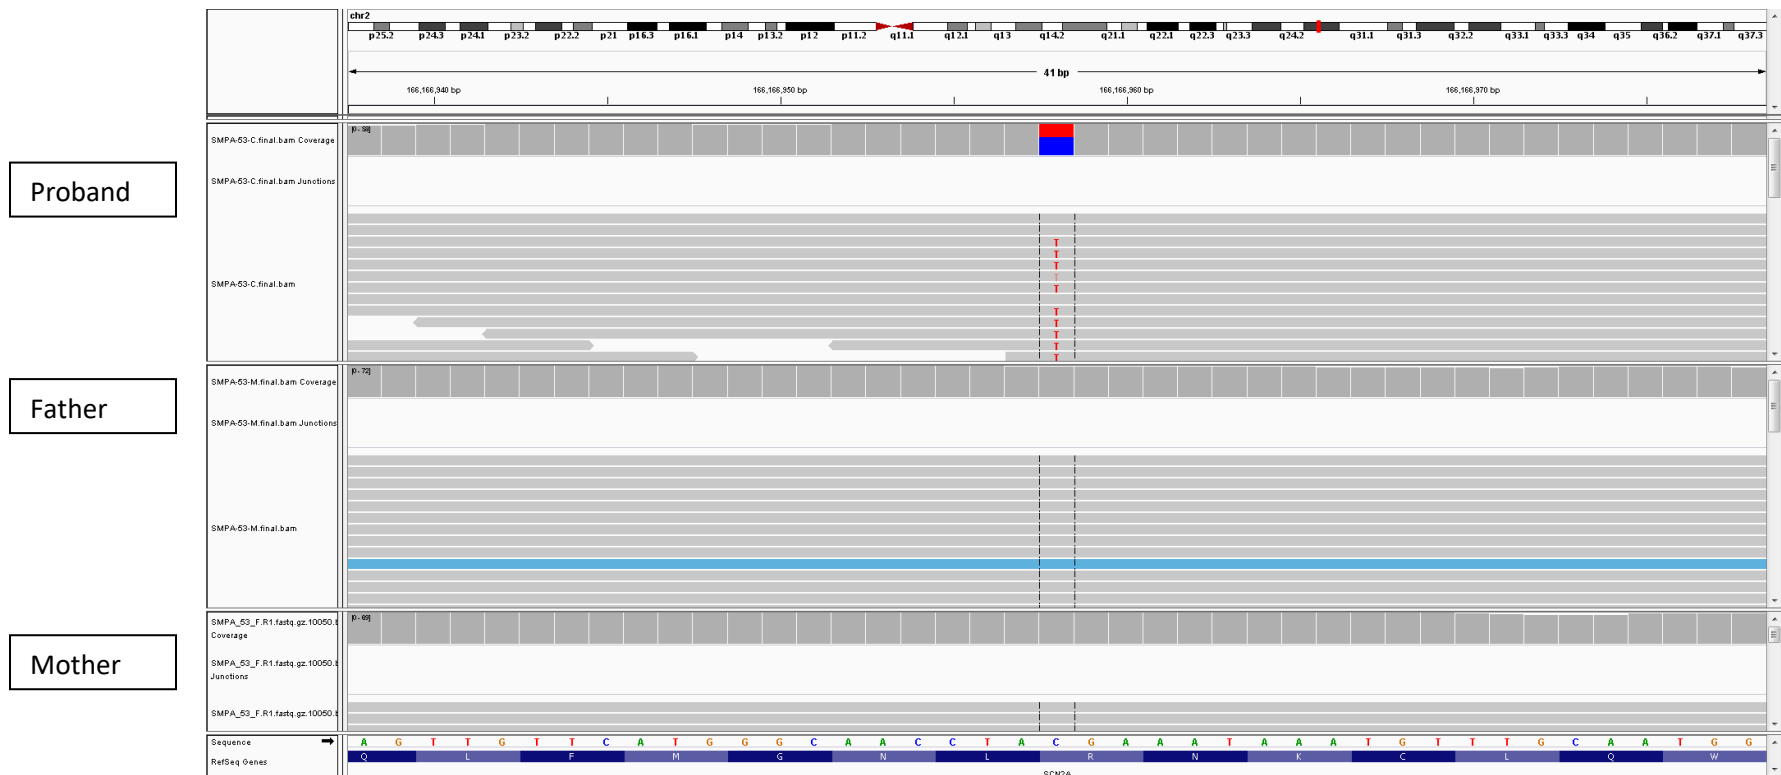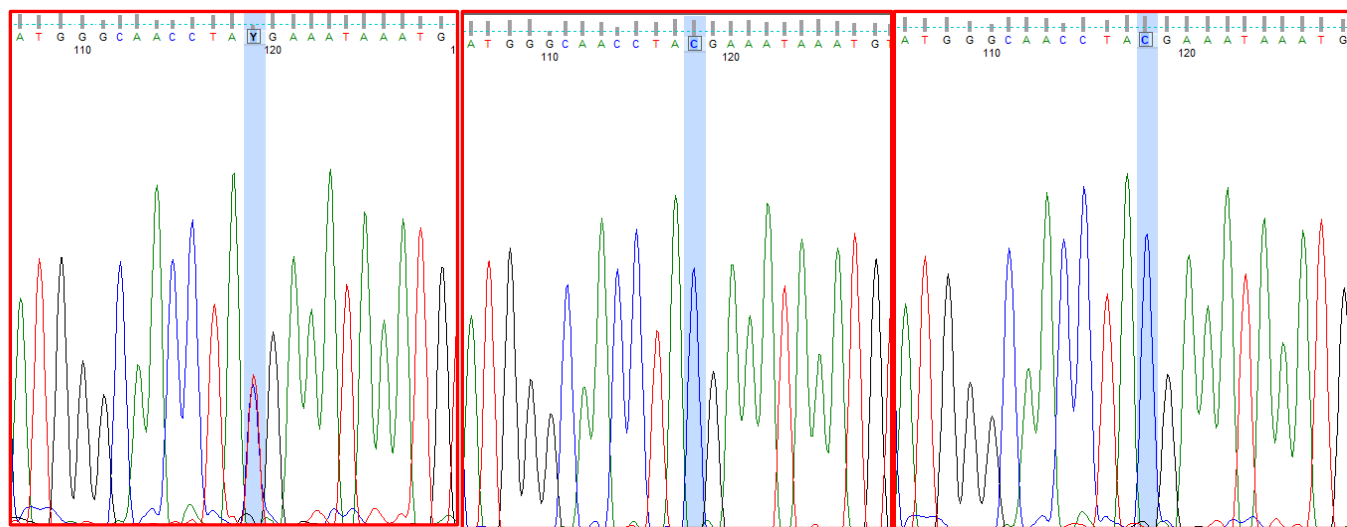

Proband

Father

Mother

# 7. SMPA38: SCN2A

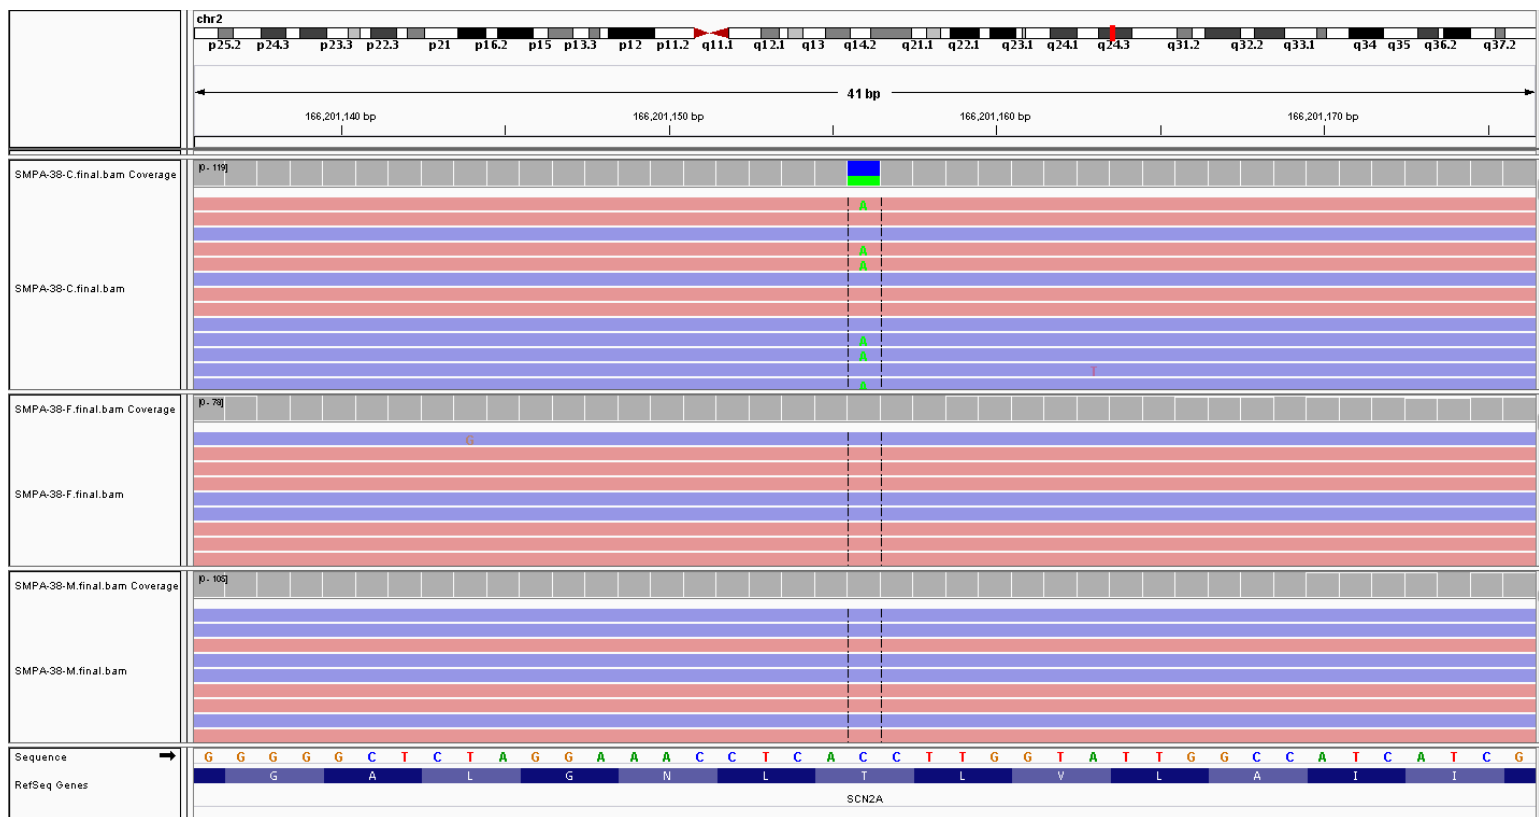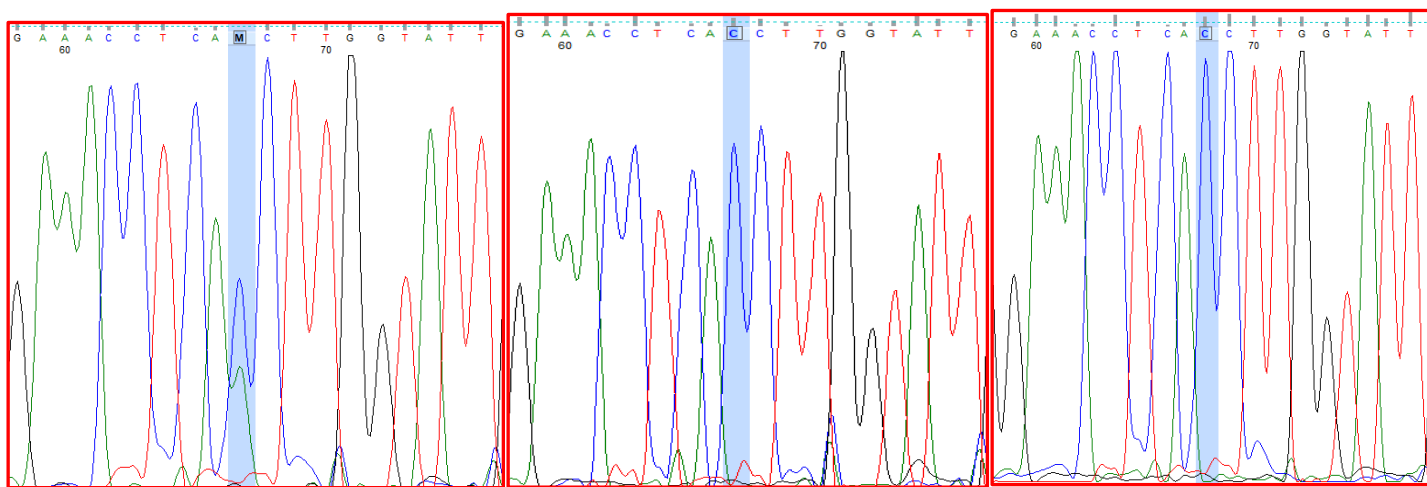

Proband

Father

Mother



8. IAU66: NCL

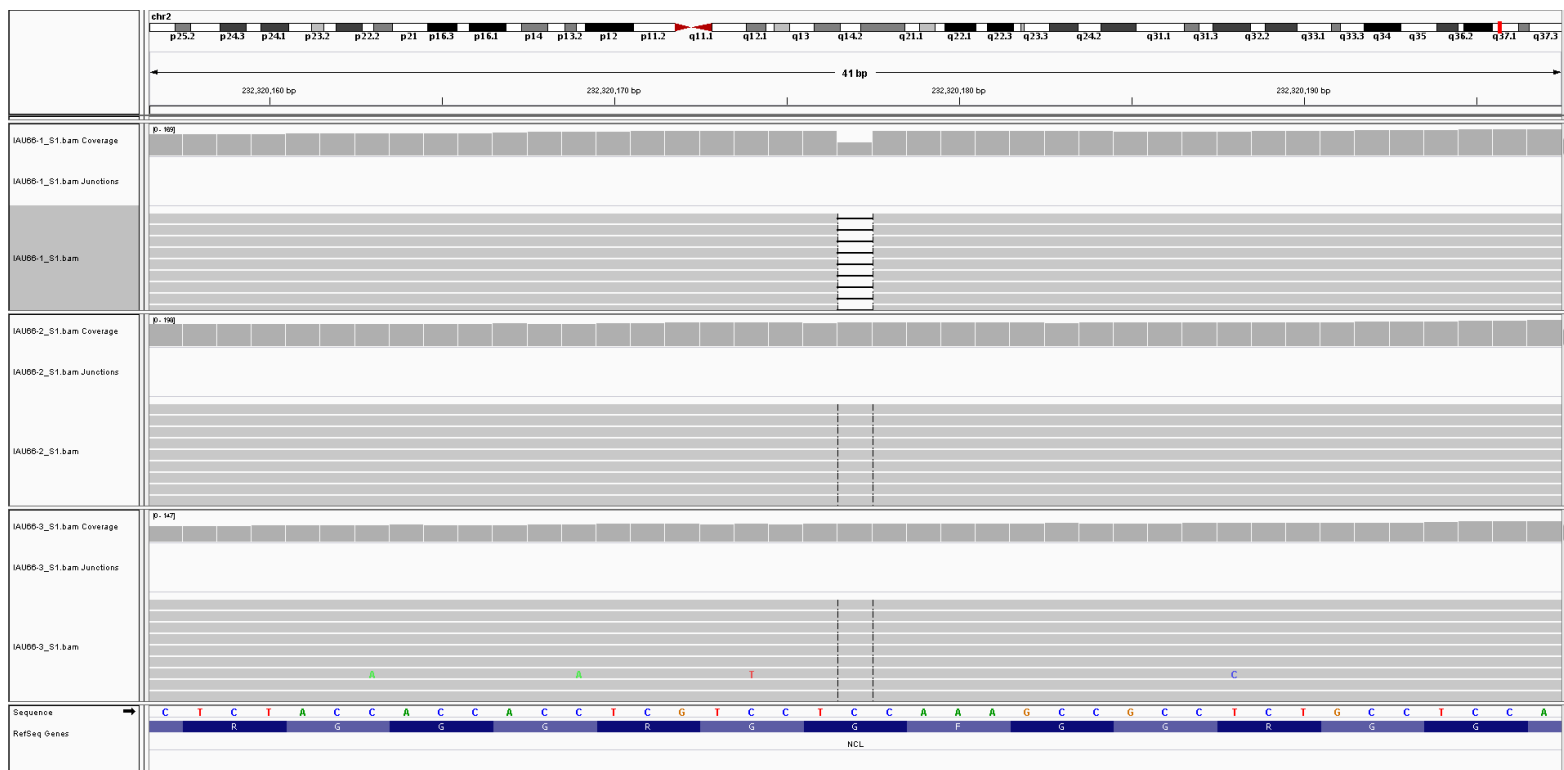

Proband

Father

Mother

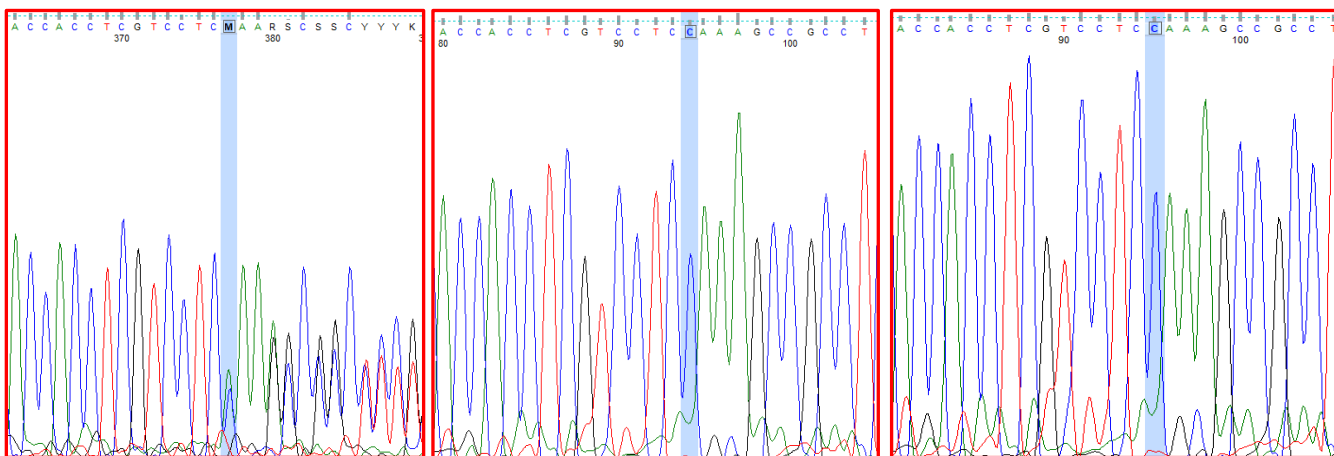

Proband

Father

Mother

# 9. SA1: SCN5A

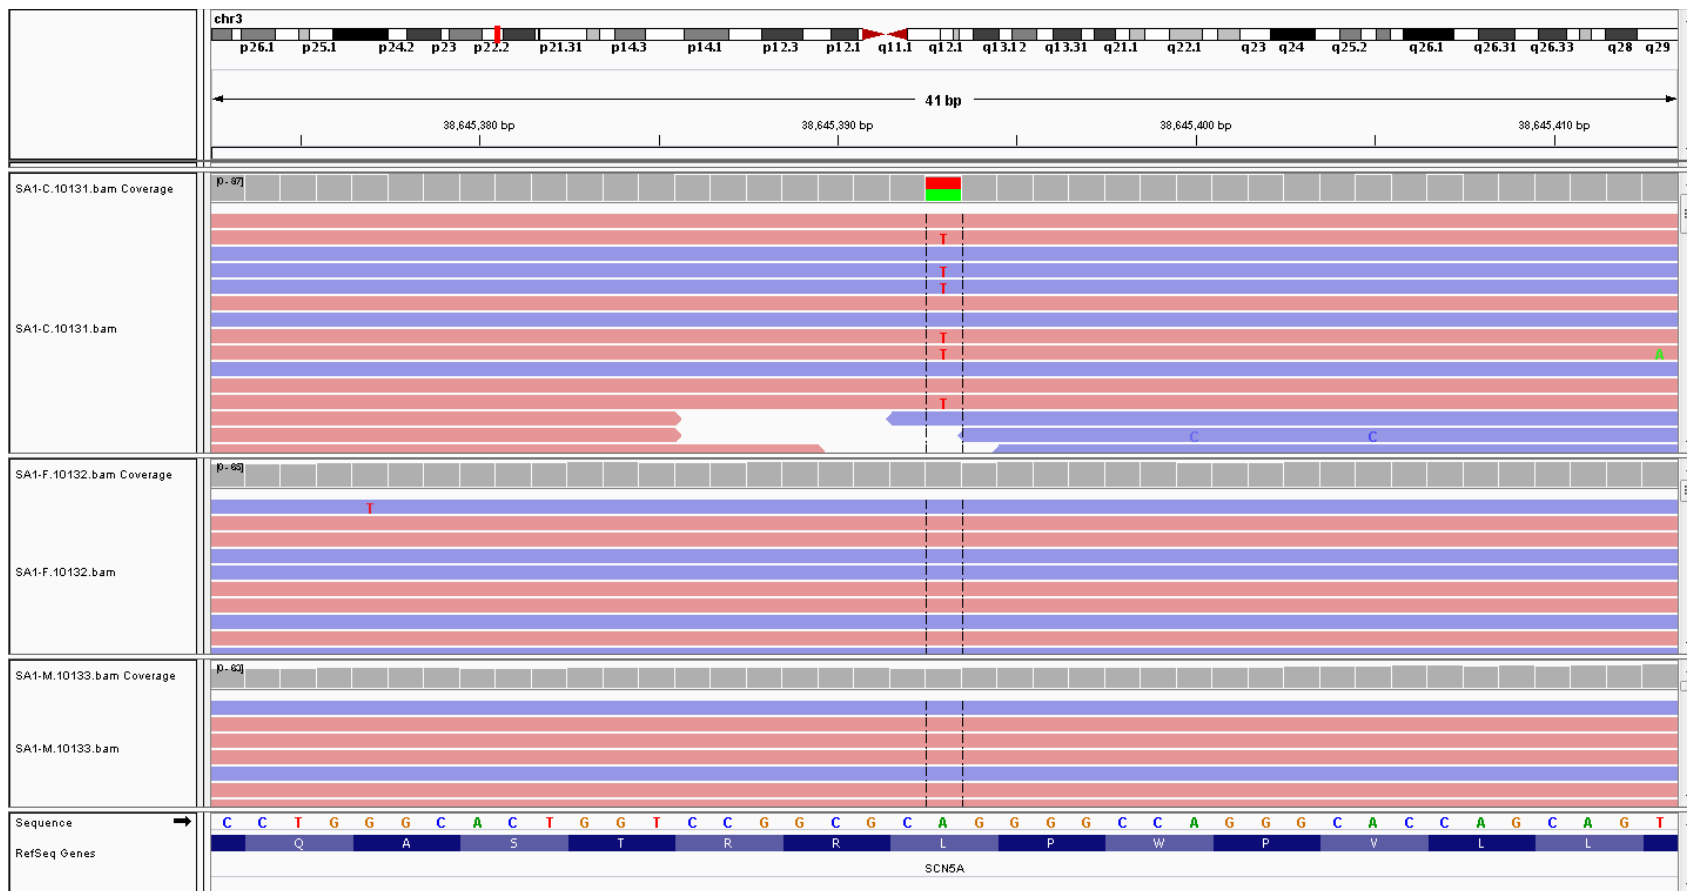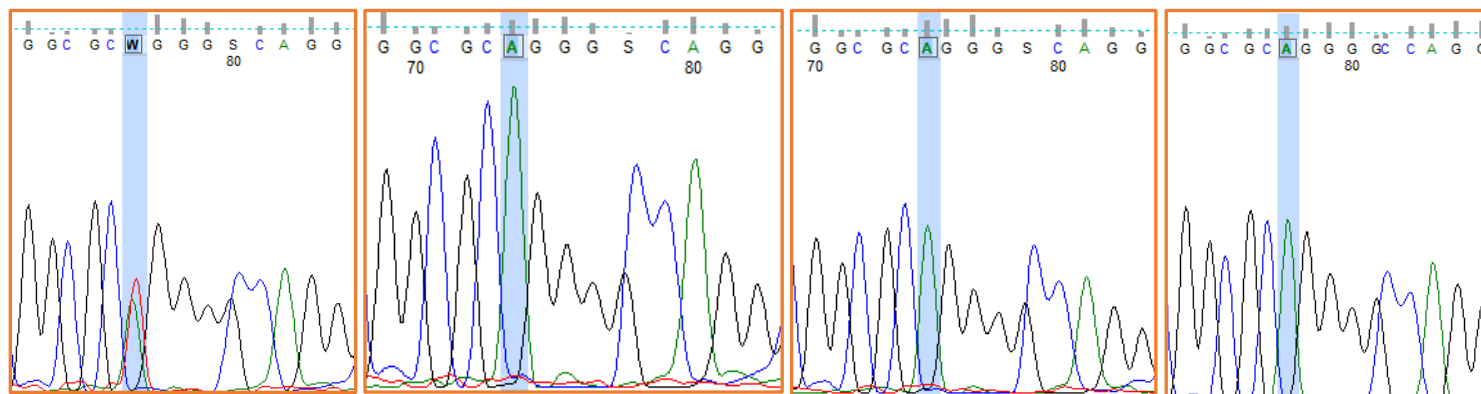

Proband

Sibling

Father

Mother

# 10. SMPA75: FAM53C

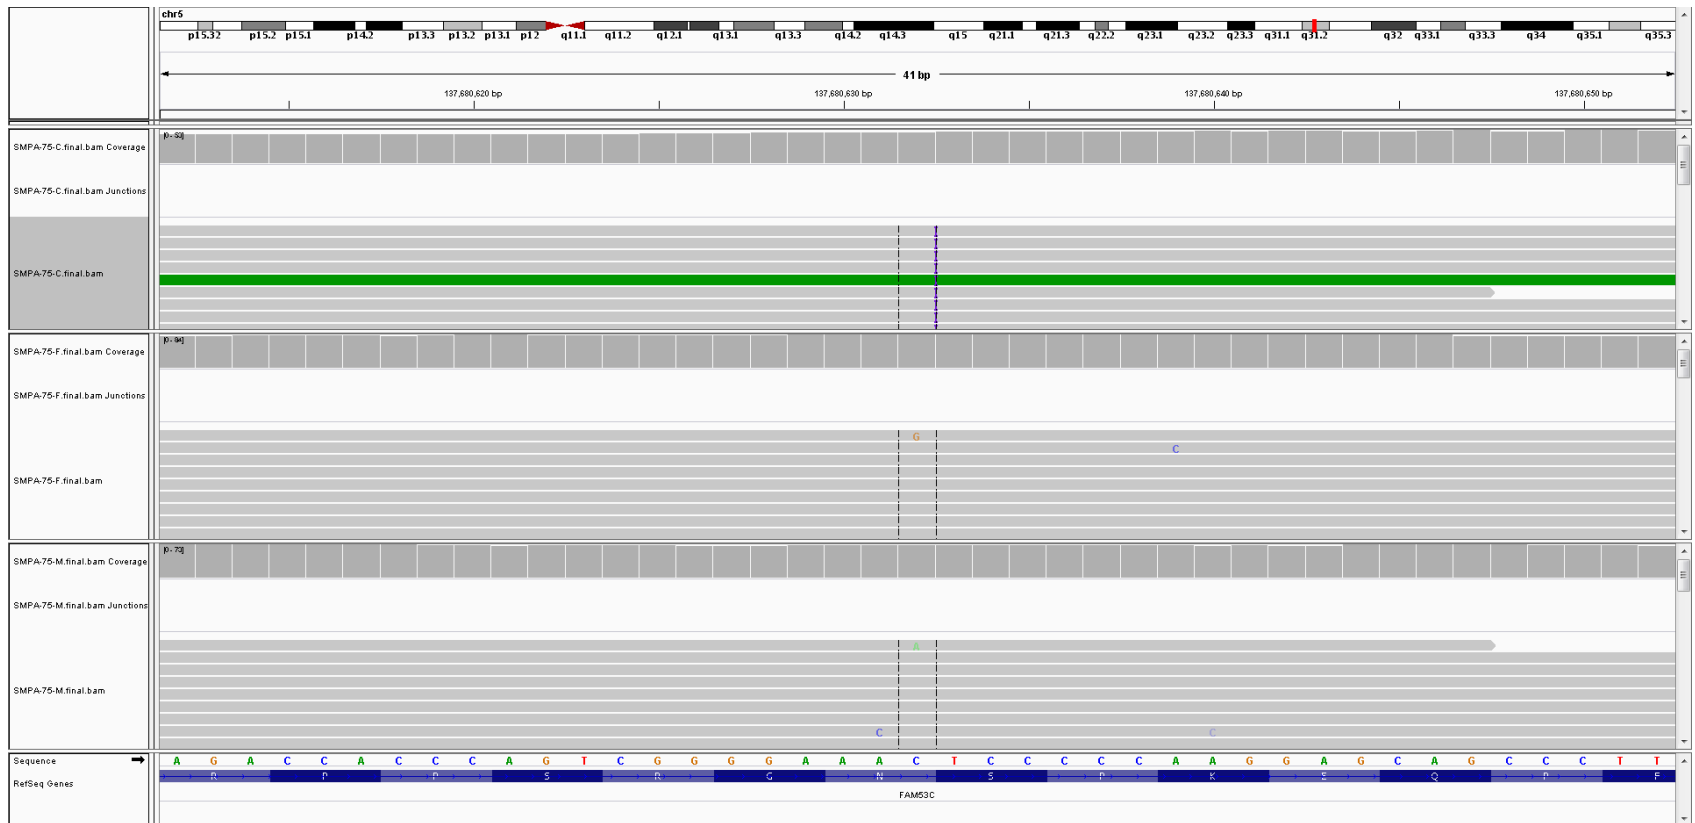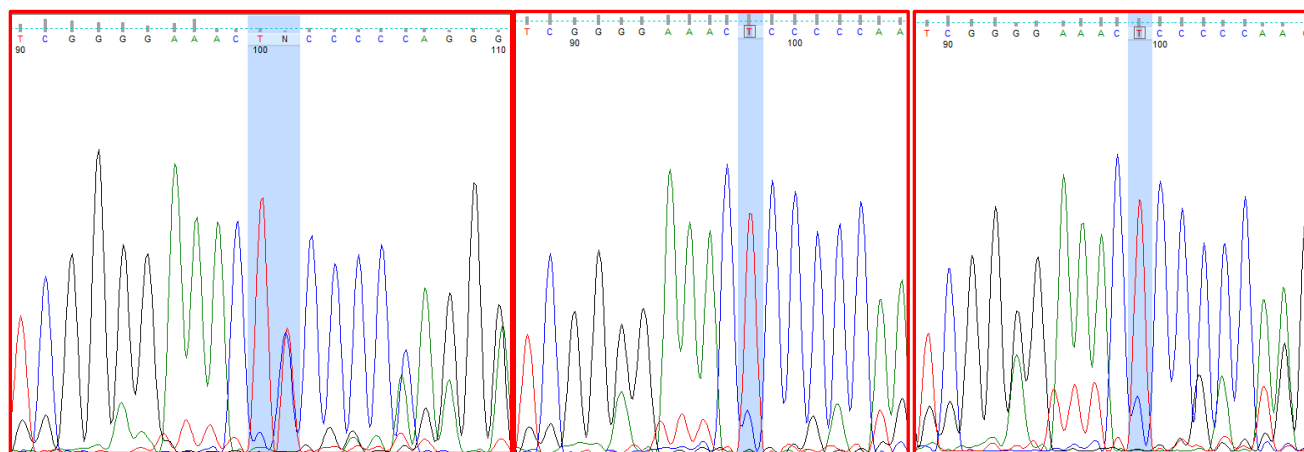

Proband

Father

Mother

# 11. SMPA75: ADGRF2

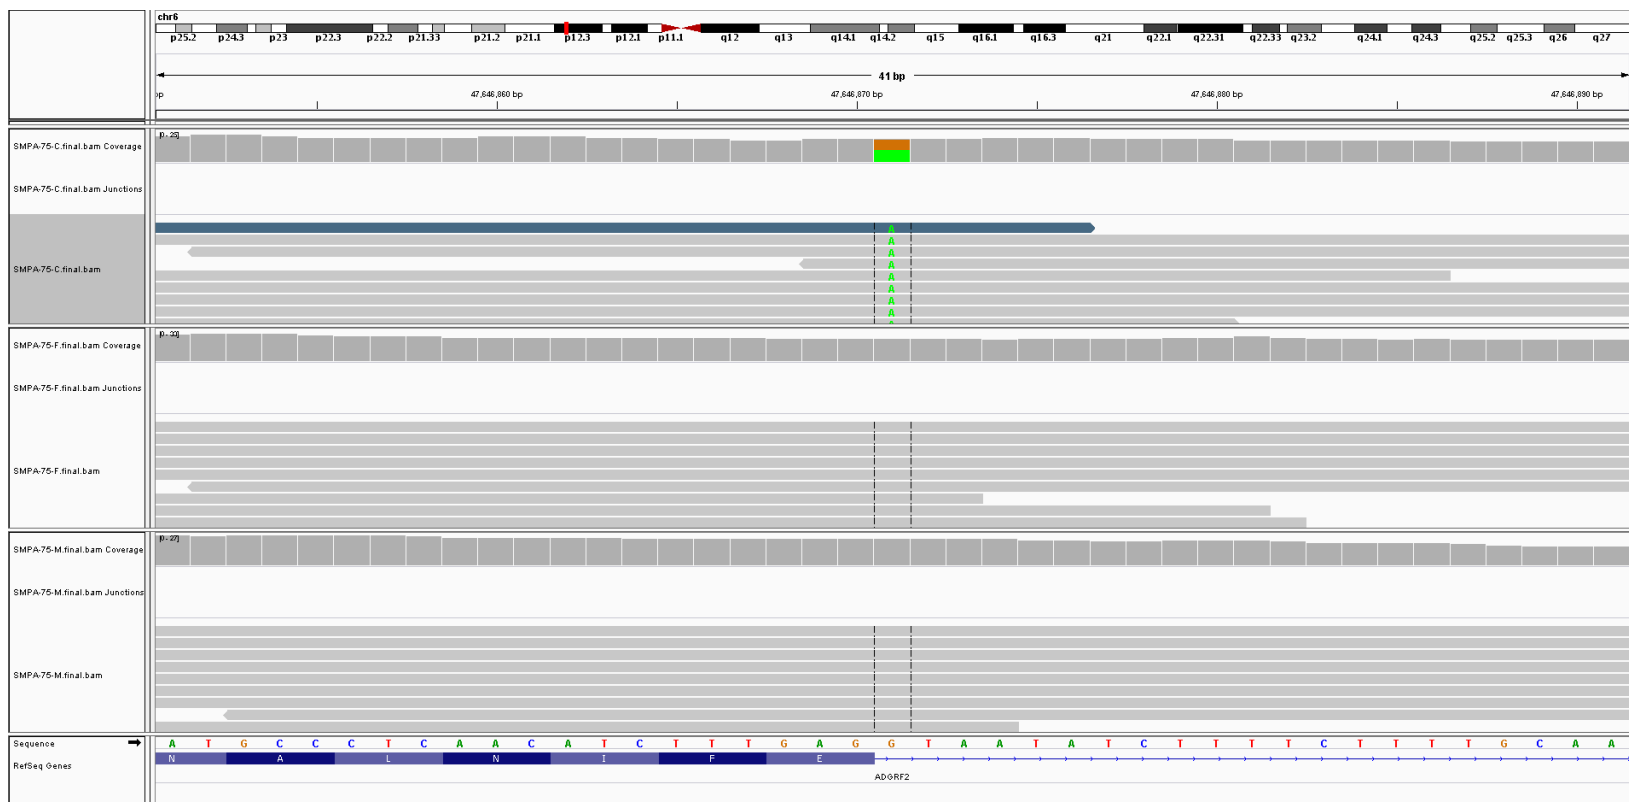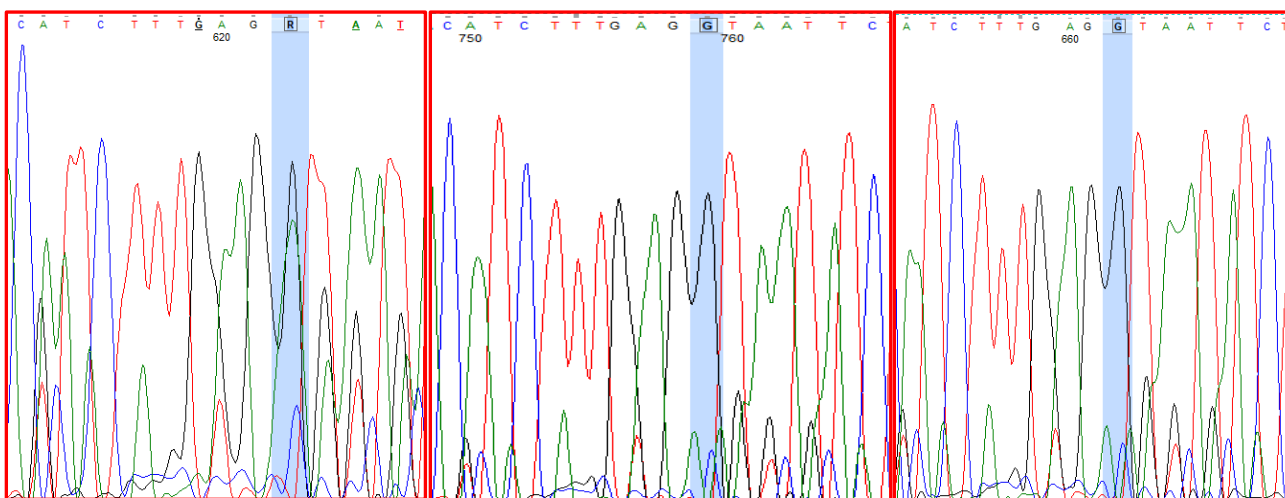

Proband

Father

Mother

## 12. Autism10: ZNF292

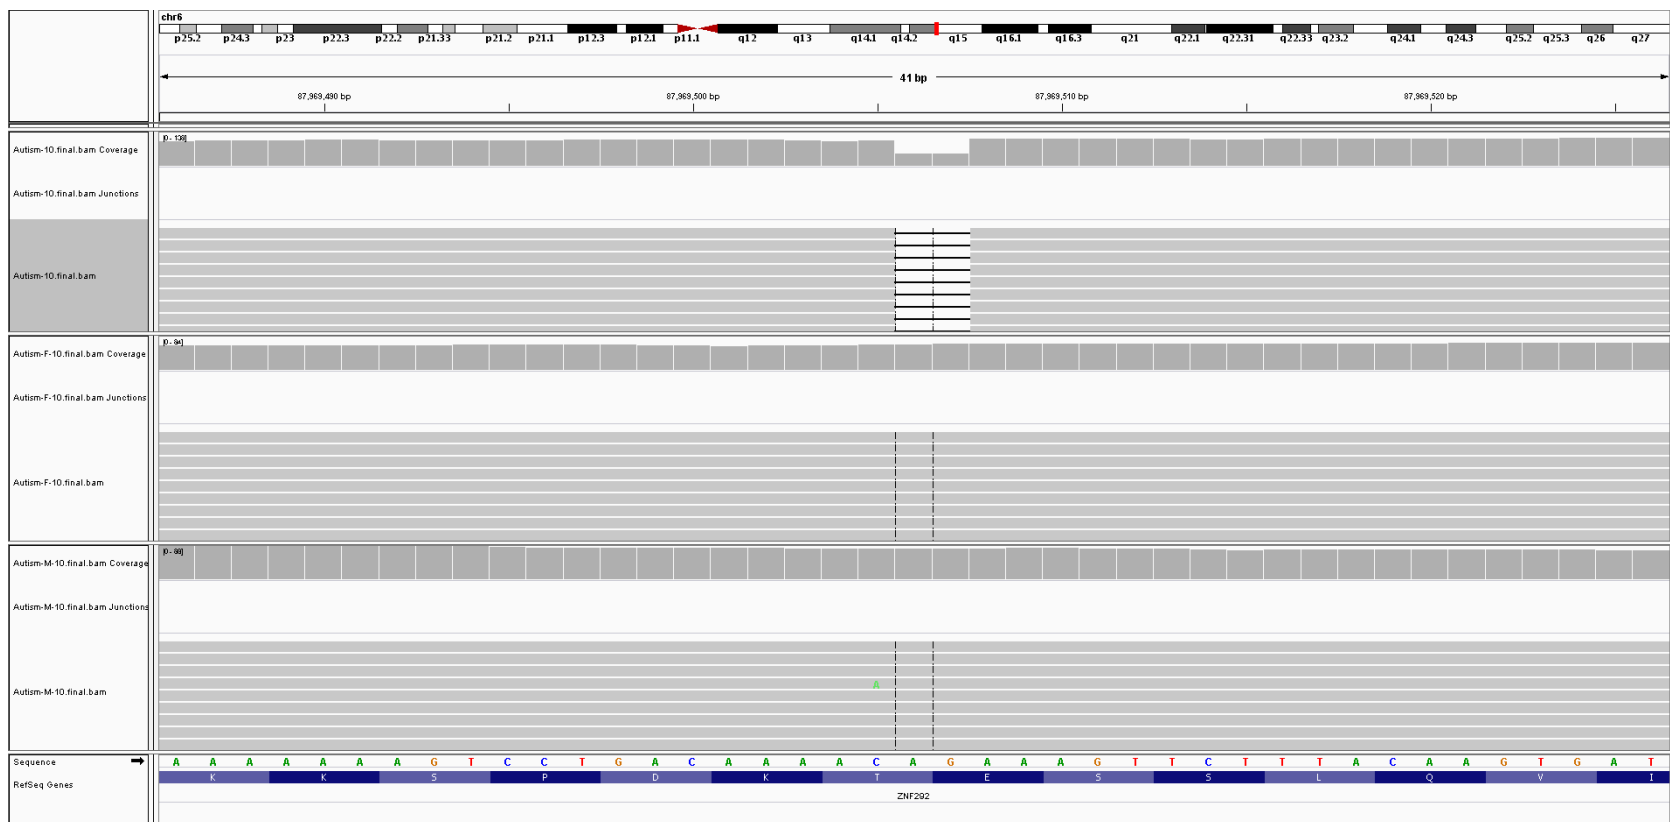

Proband

Father

Mother

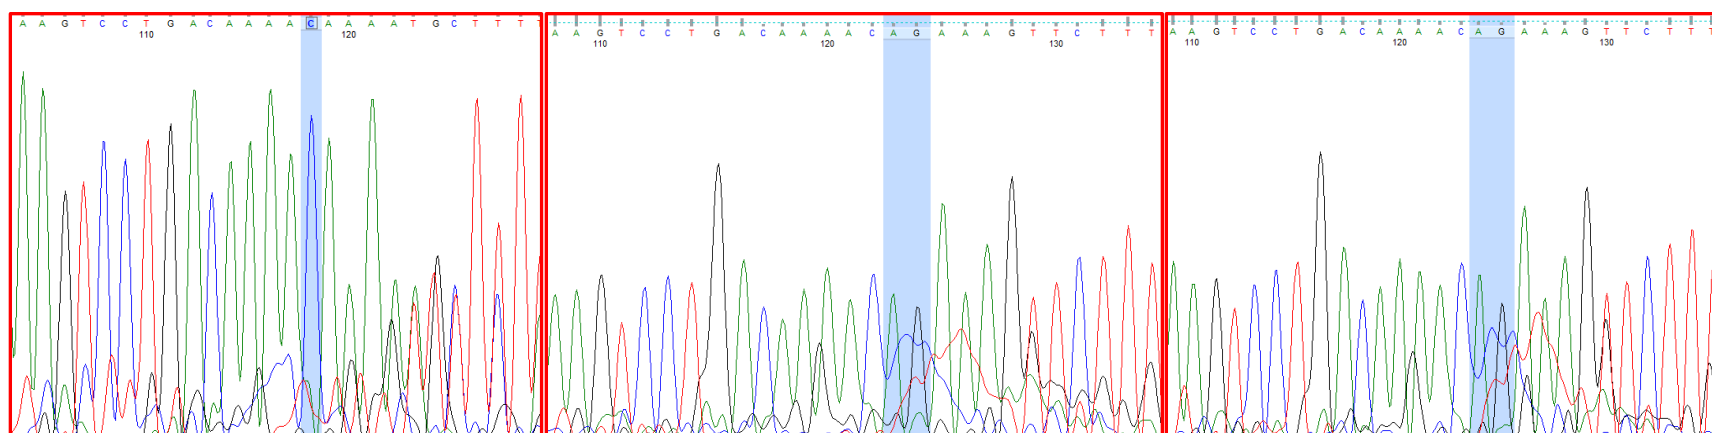

Proband

Father

Mother

13. IAU65: ZNF292

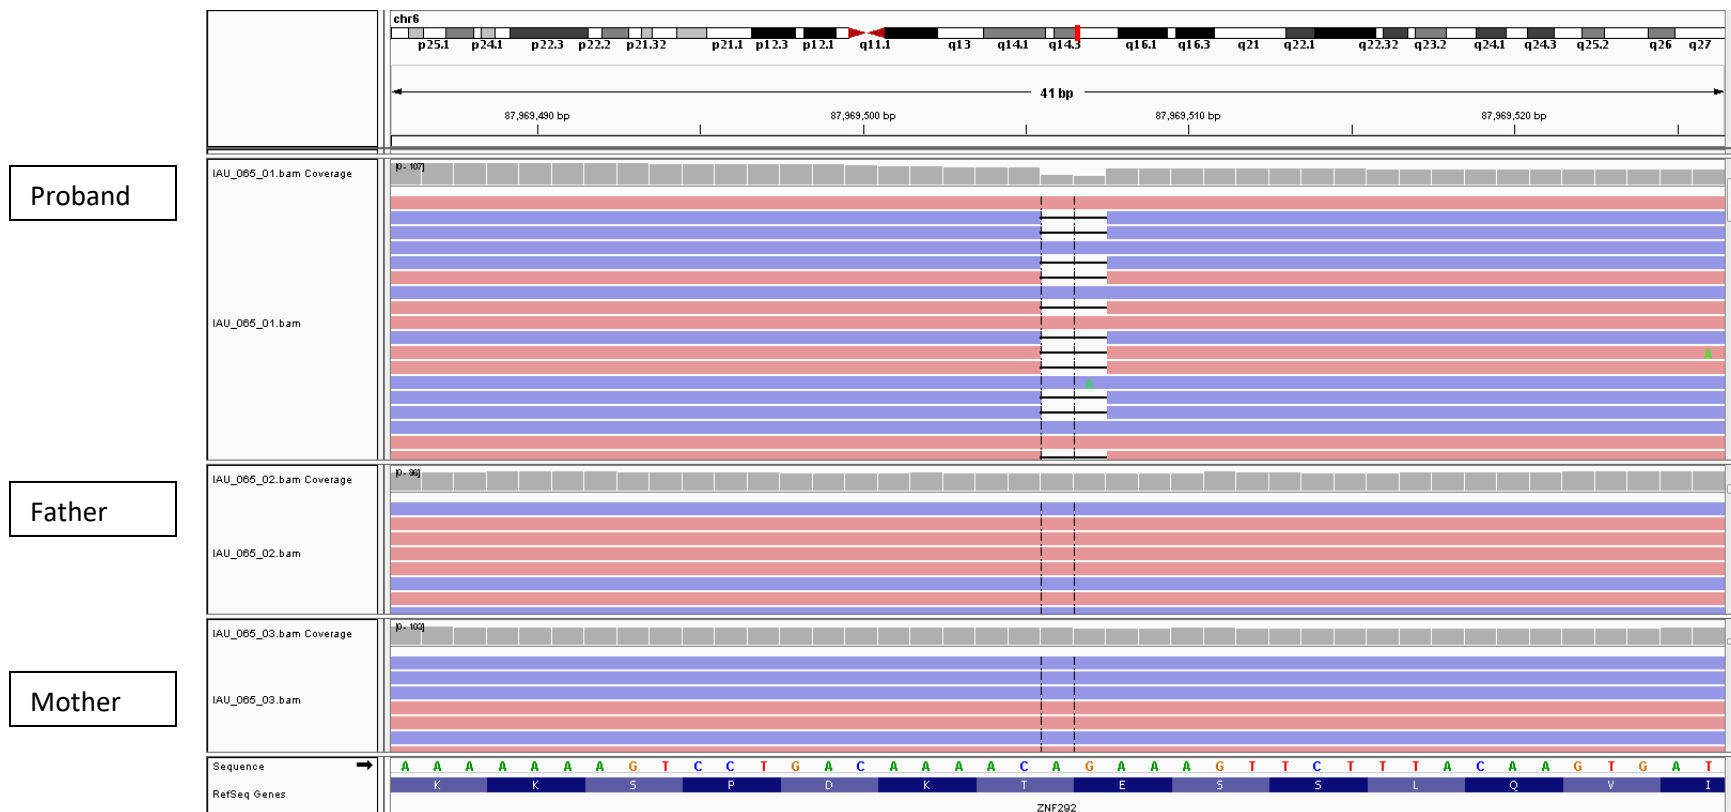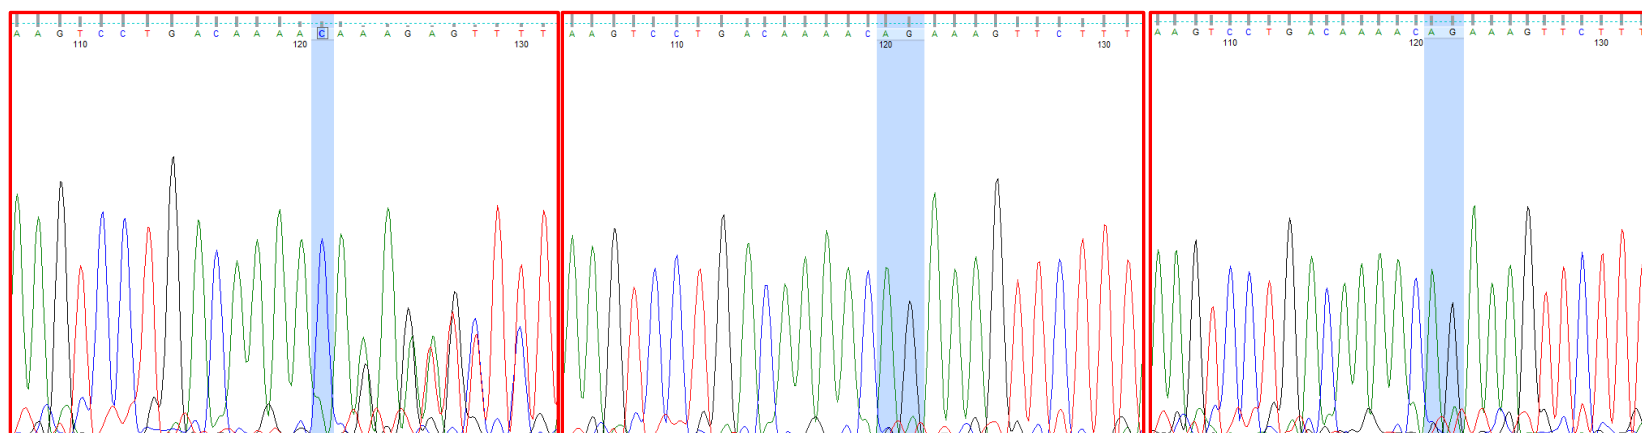

Proband

Father

Mother

14. RQPA20: *DGKZ*

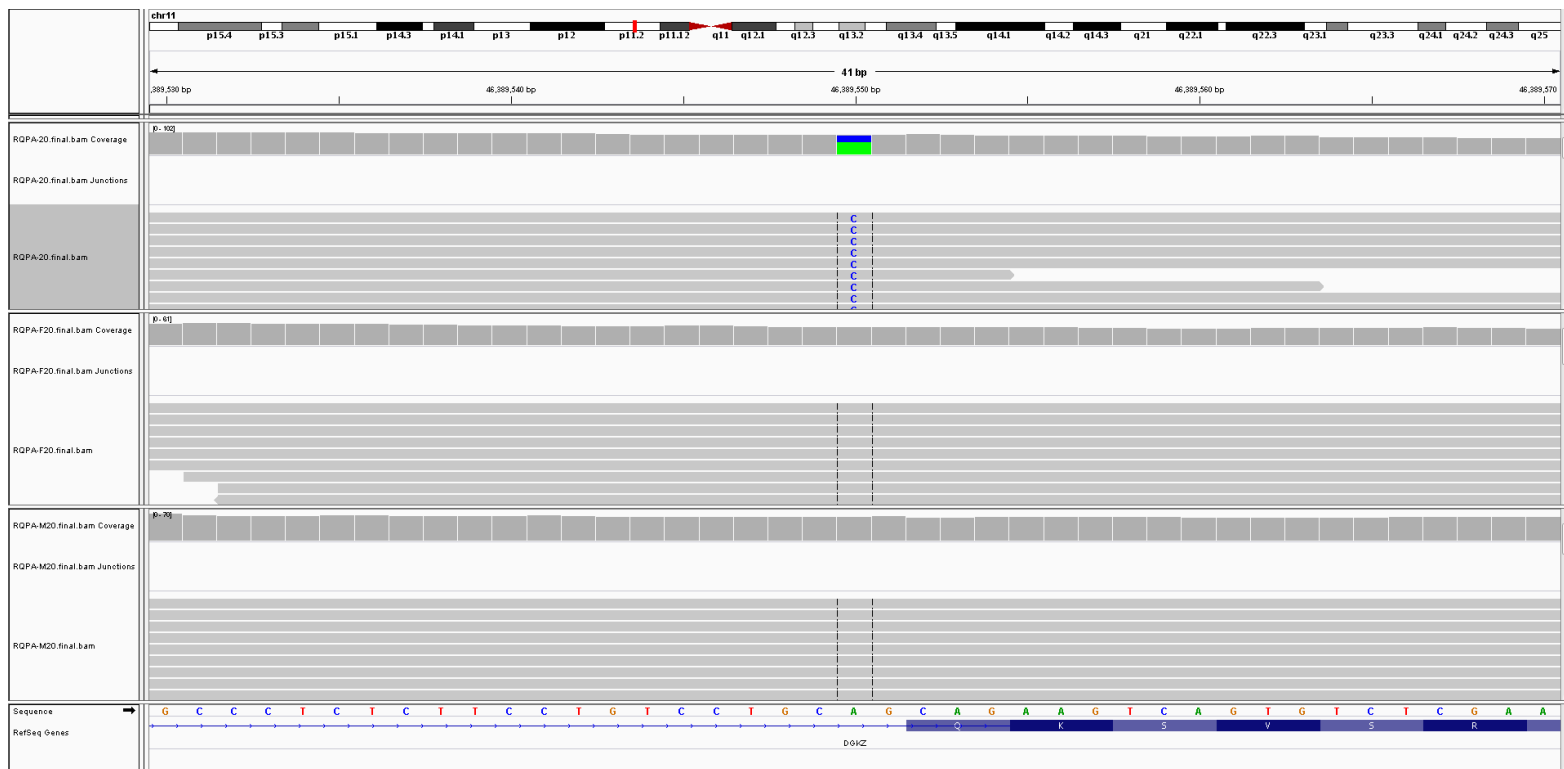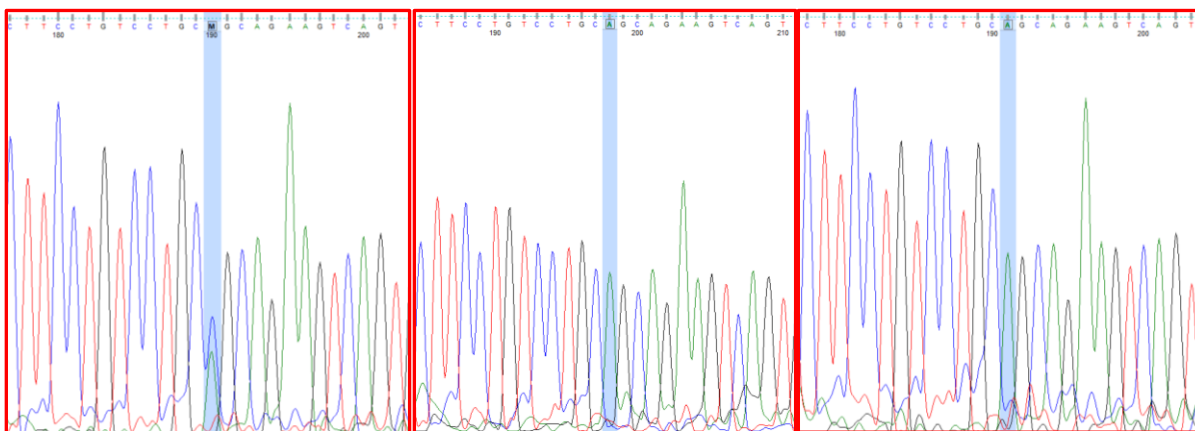

Proband

Father

Mother

# 15. Autism9: SCN8A

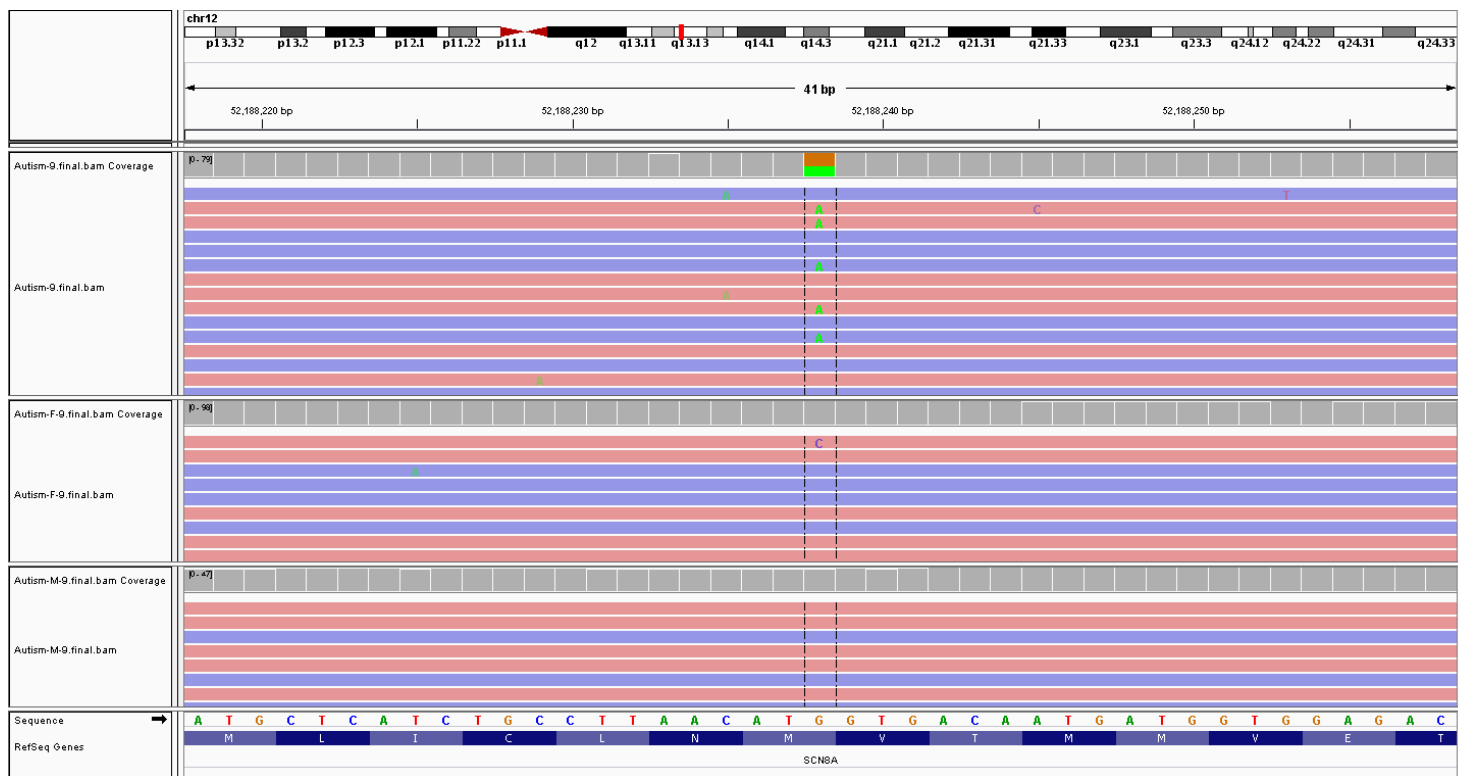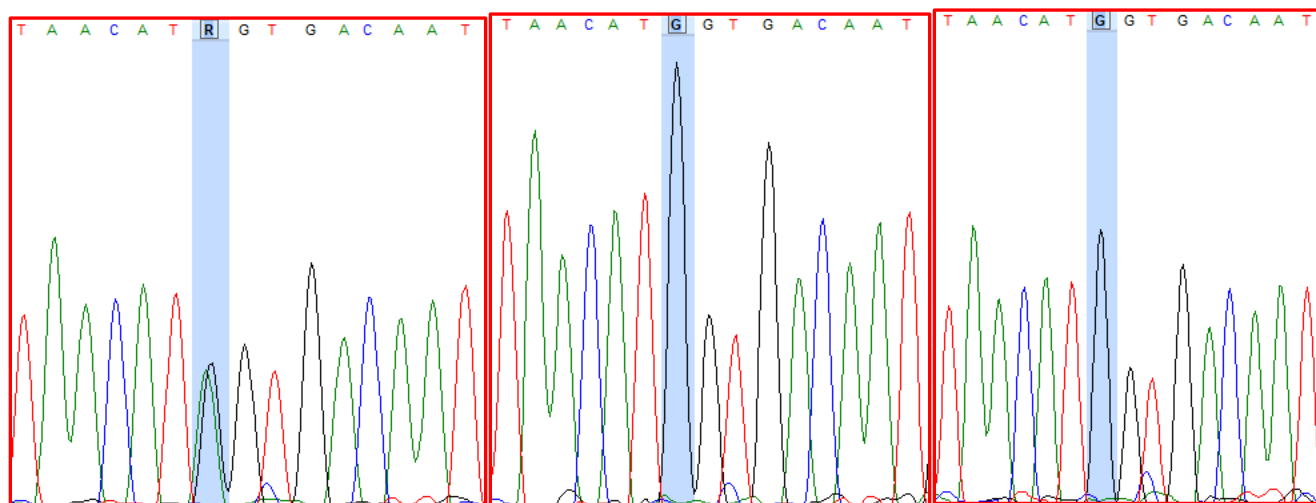

Proband

Father

Mother



16. SMPA73: *ATP2B1*

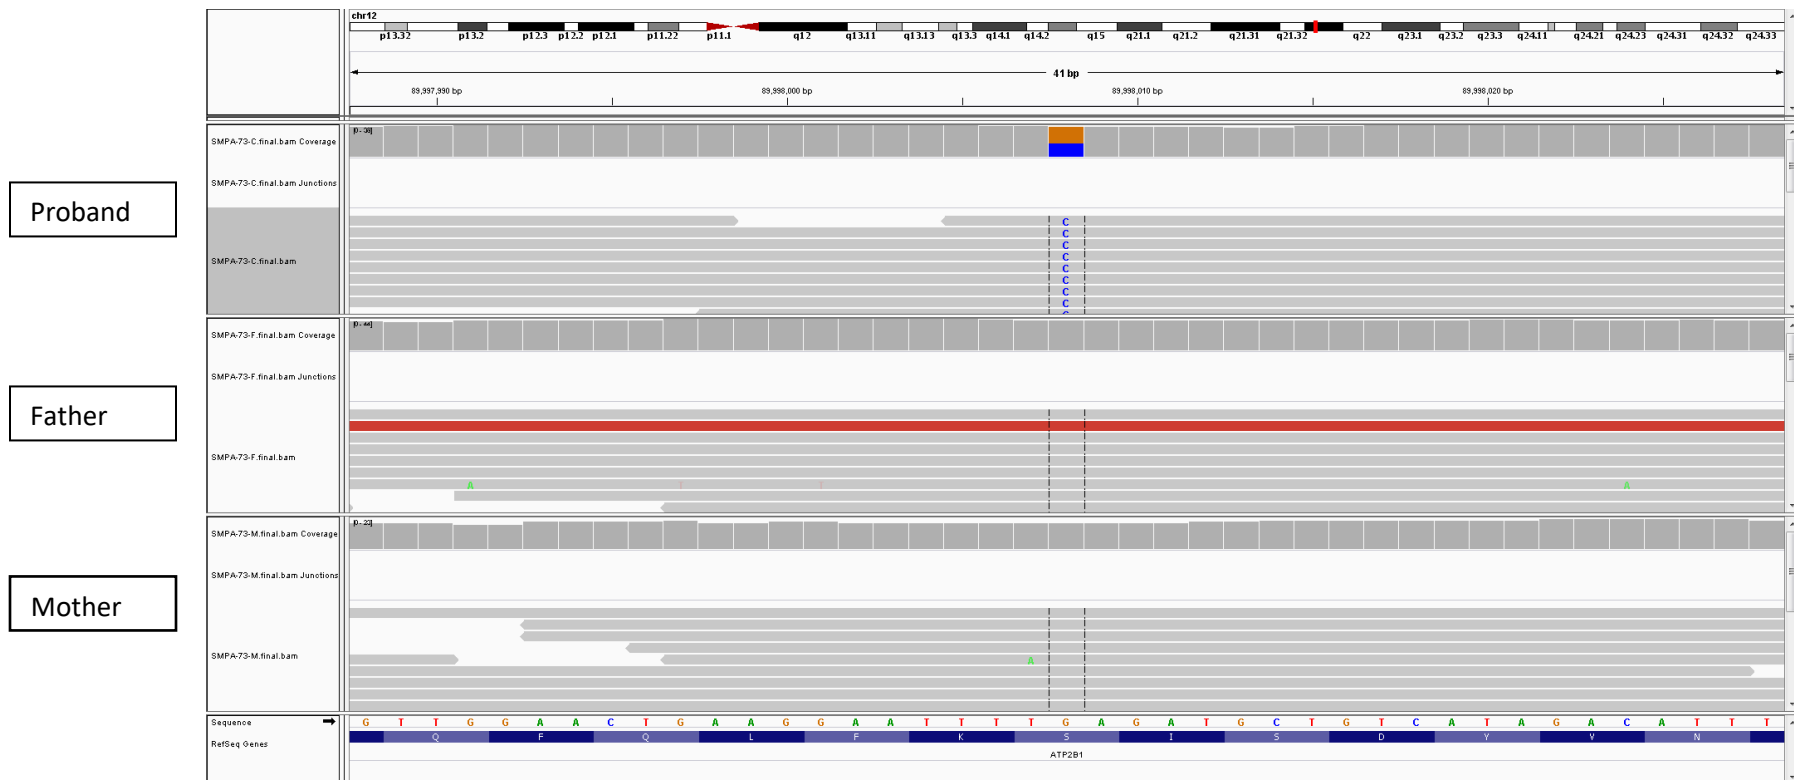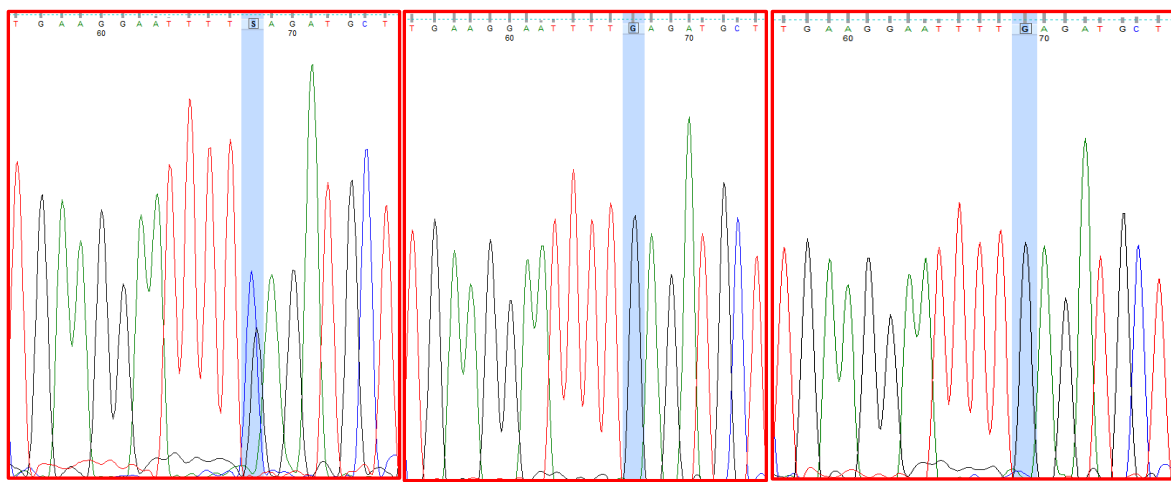

Proband

Father

Mother

17. RQPA20: *CBFA2T3*

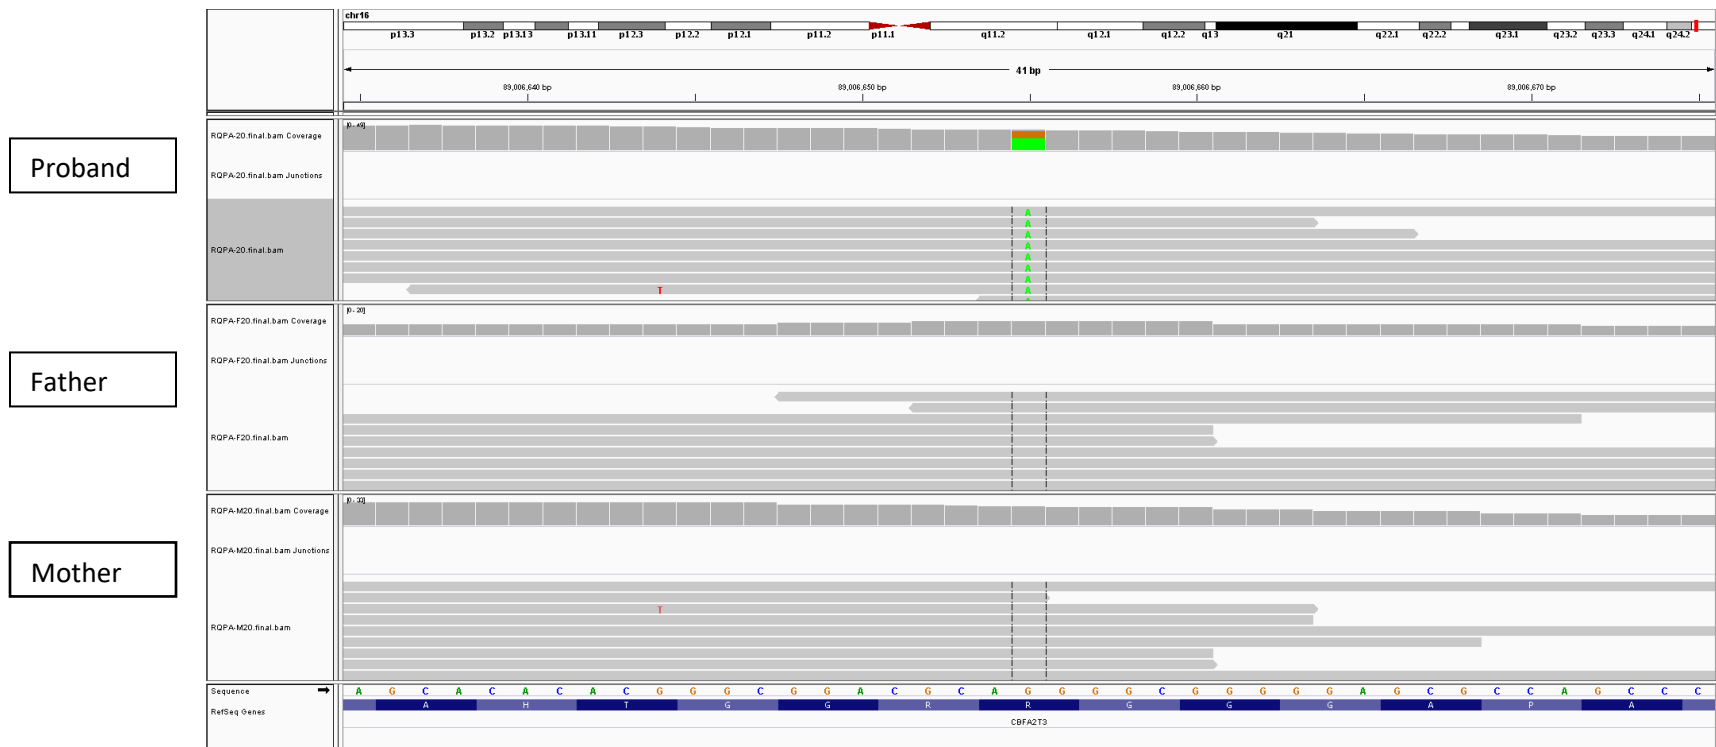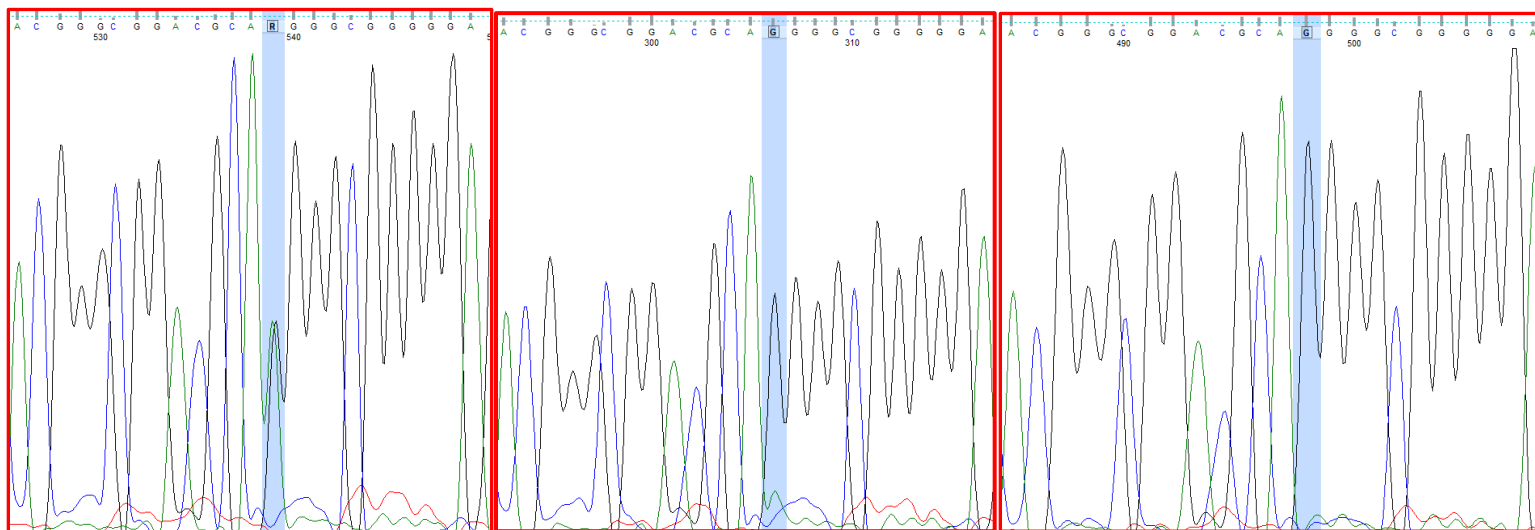

Proband

Father

Mother

18. SMPA75: *RETN*

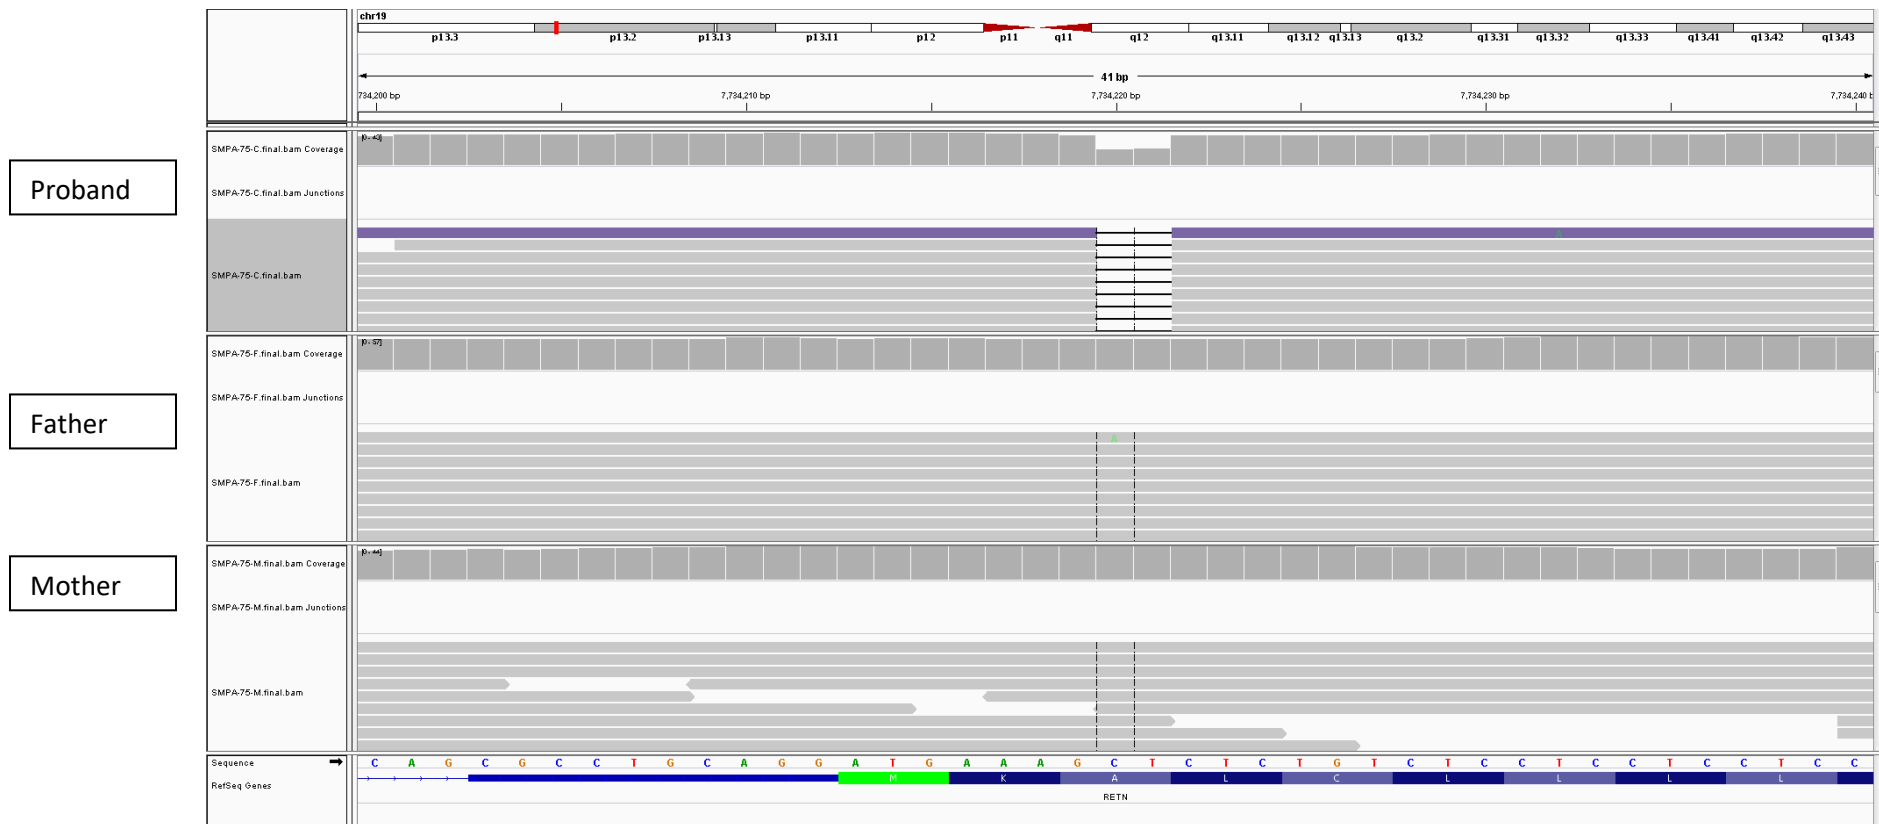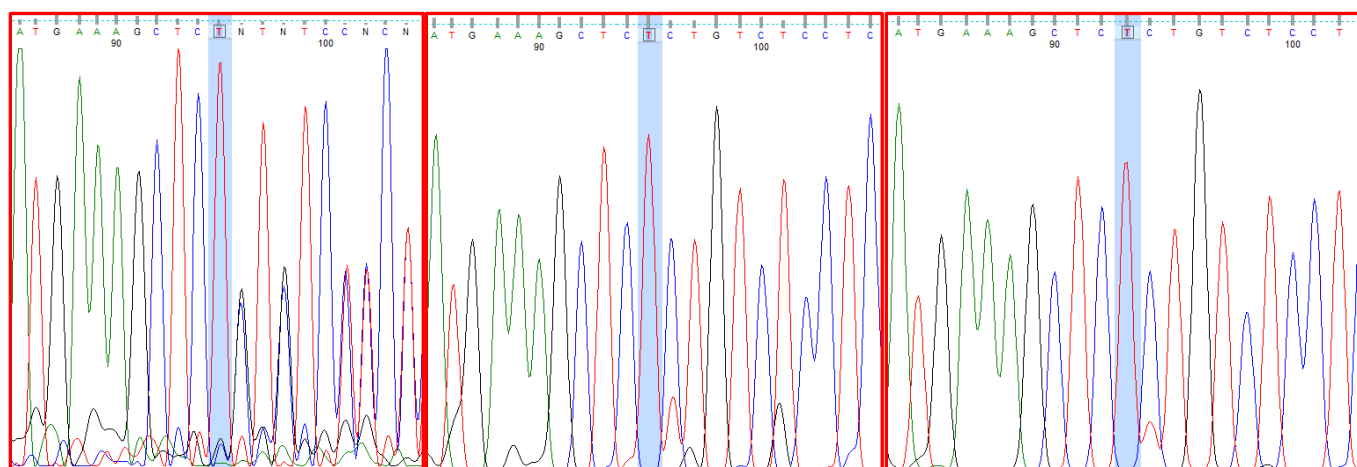

Proband

Father

Mother

19. RQPA20: TANGO2

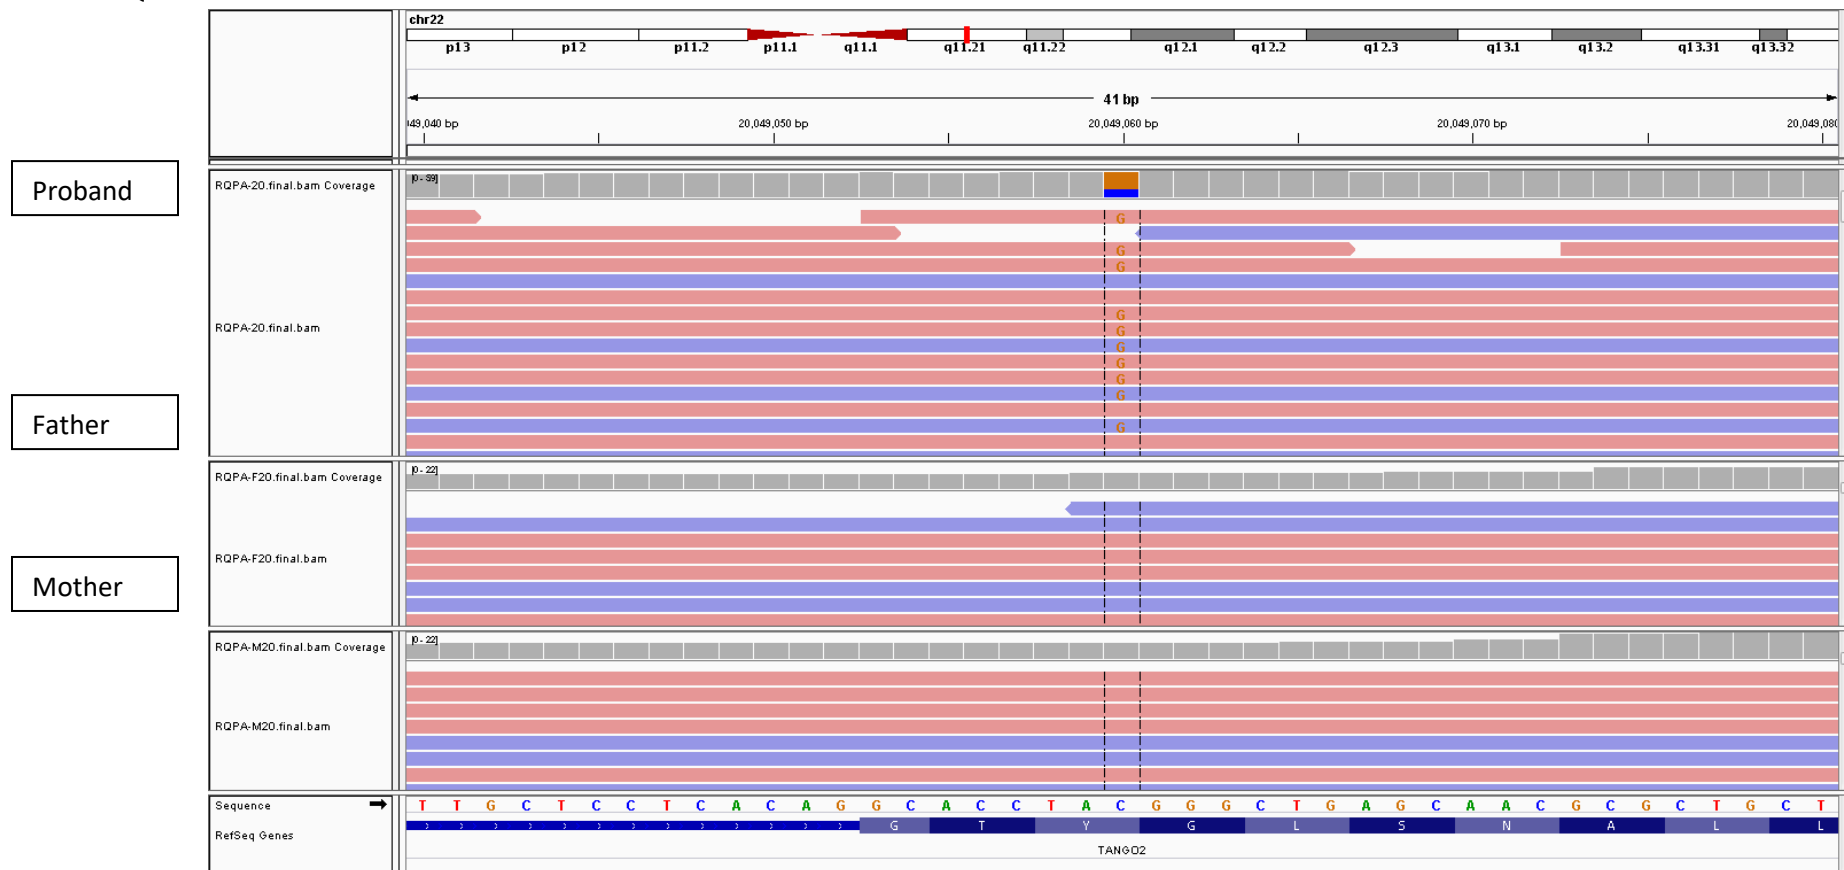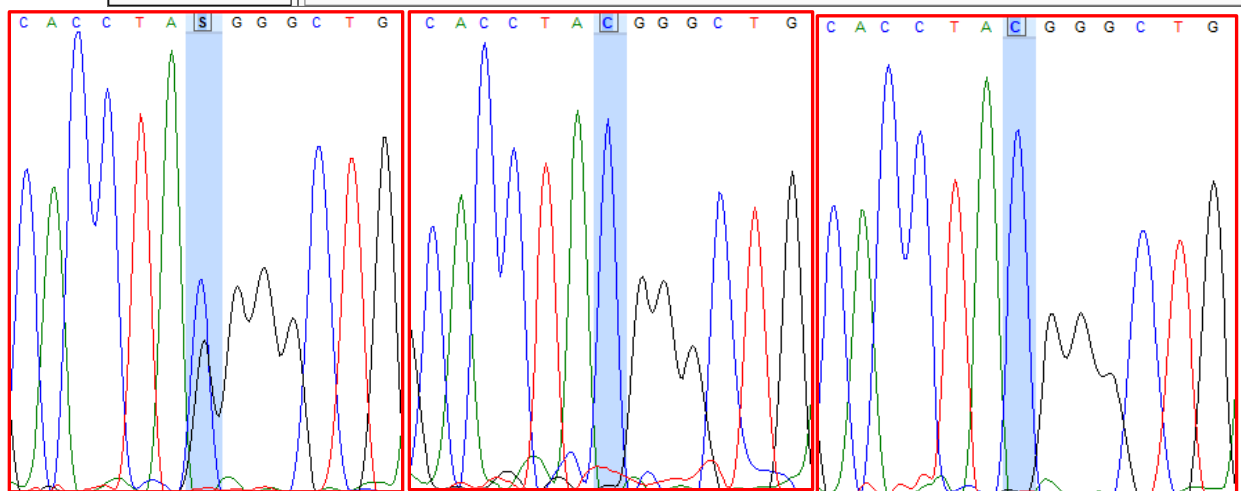

Proband

Father

Mother

20. RQPA20: *PPIL2*

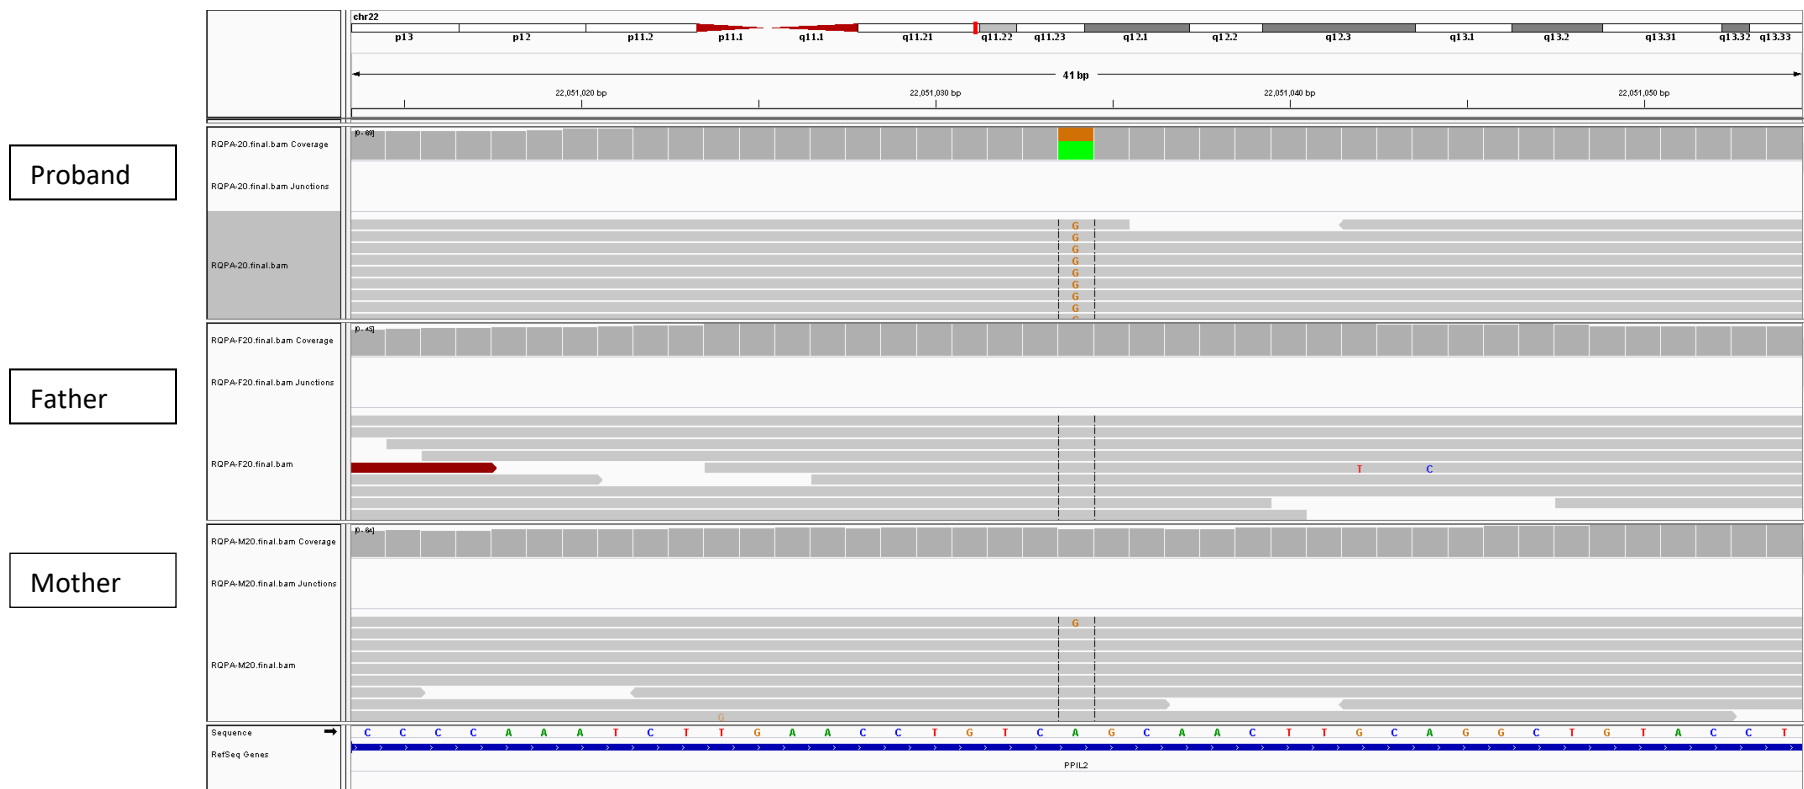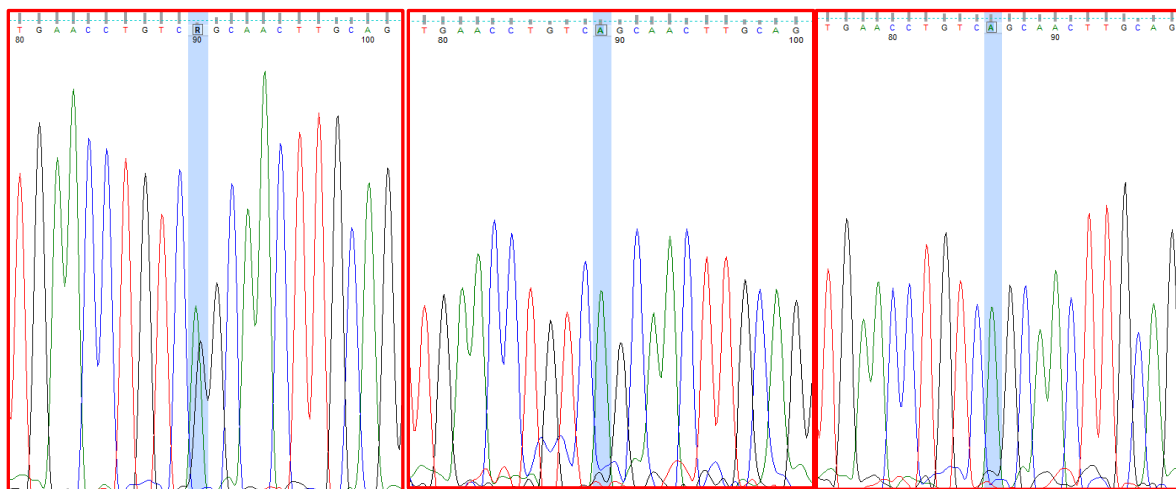

Proband

Father

Mother

**Table 4: X-linked variants**

1. SMPA3: *MAGEB2*

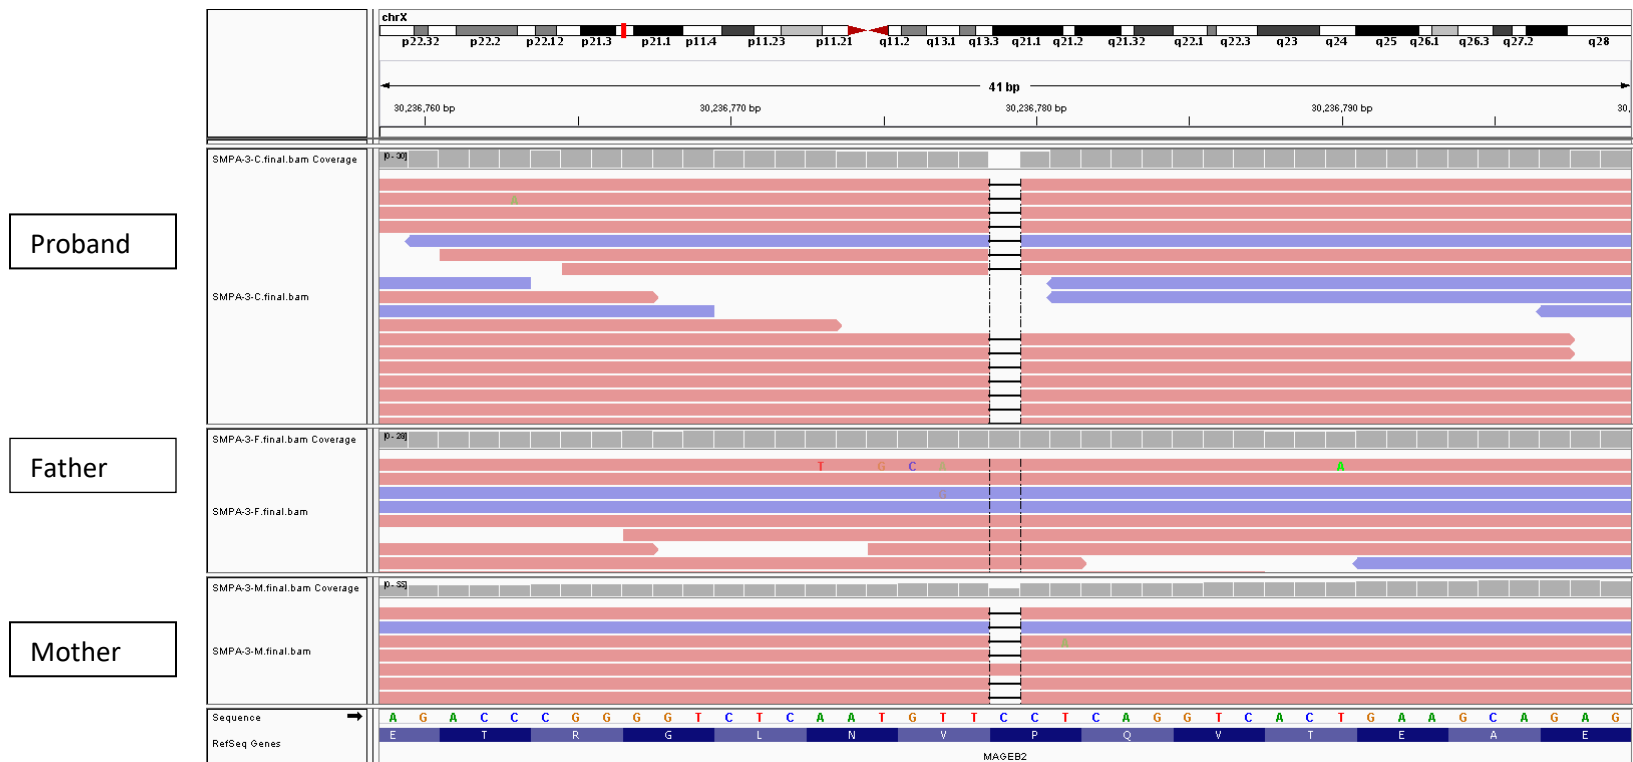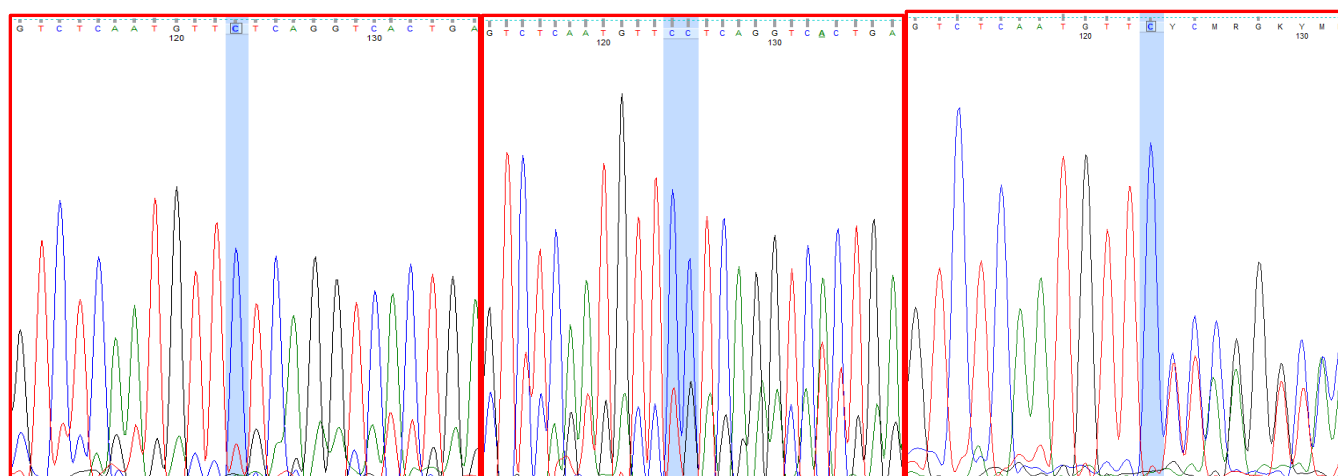

Proband

Father

Mother

## 2. IAU66: HDAC6

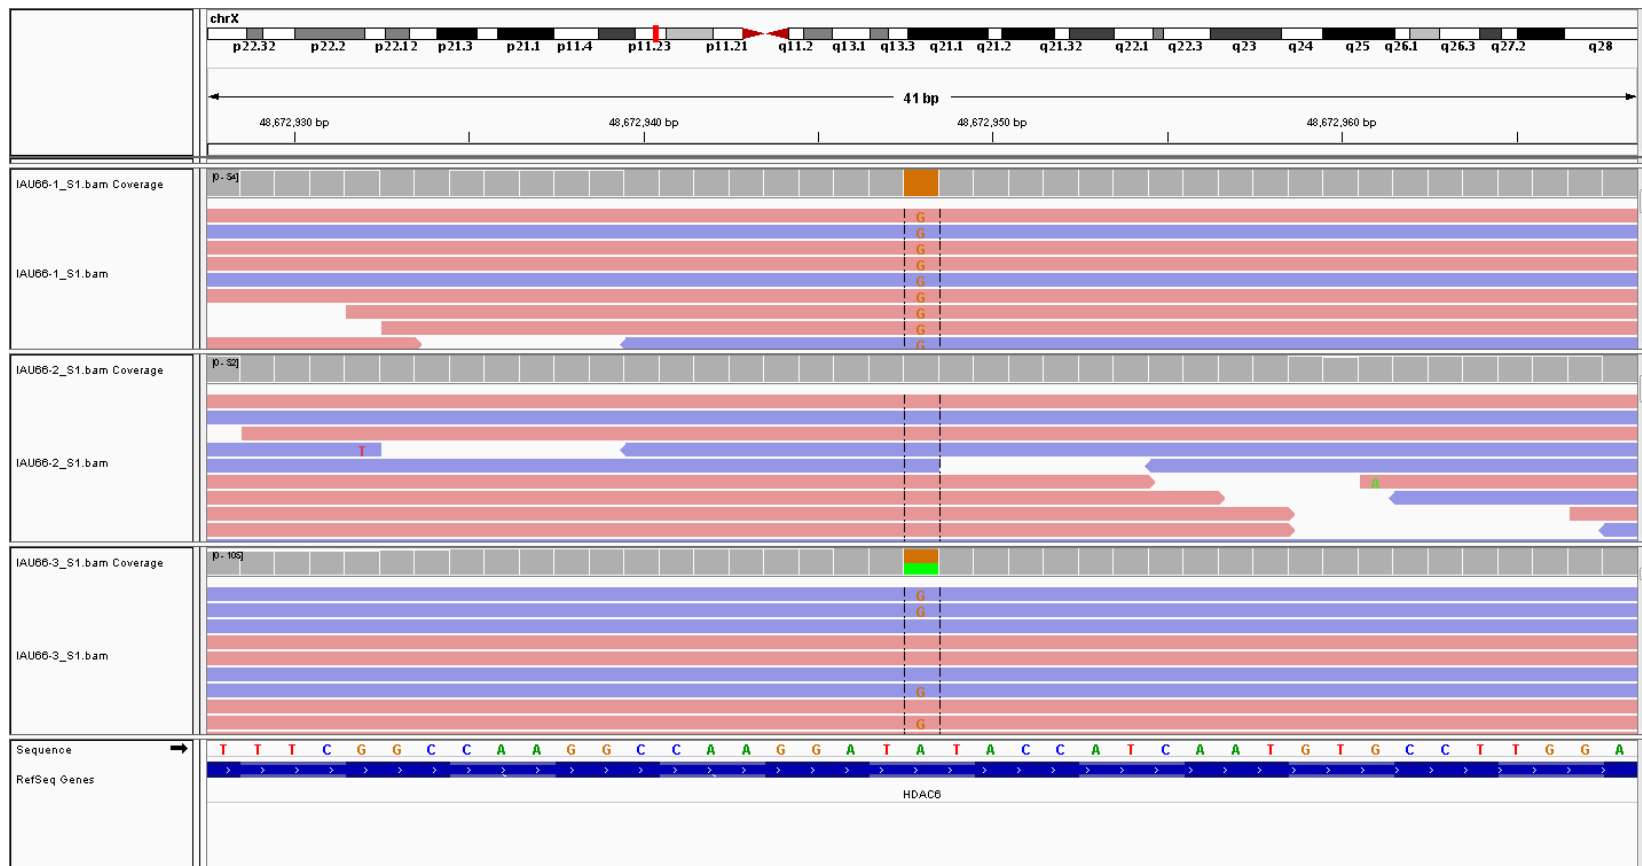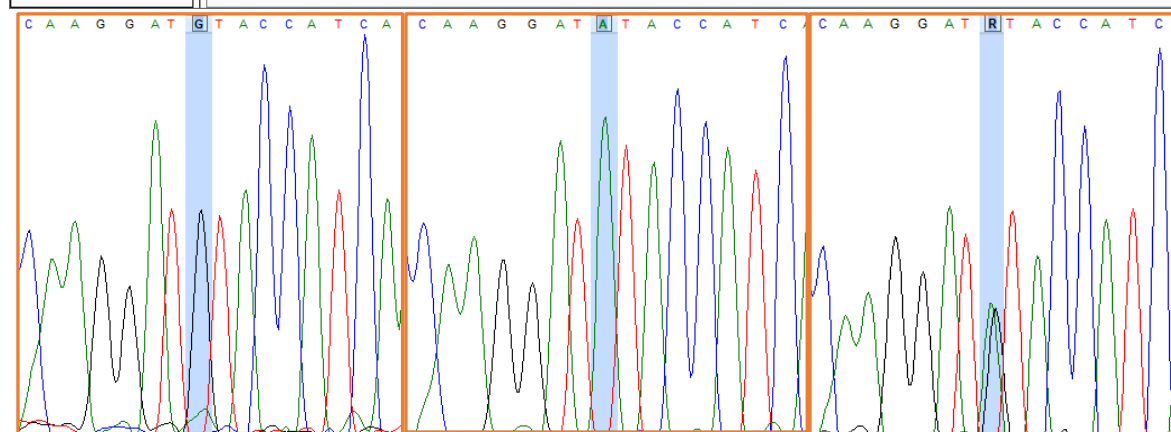

Proband

Father

Mother

### 3. IAU69: RRAGB

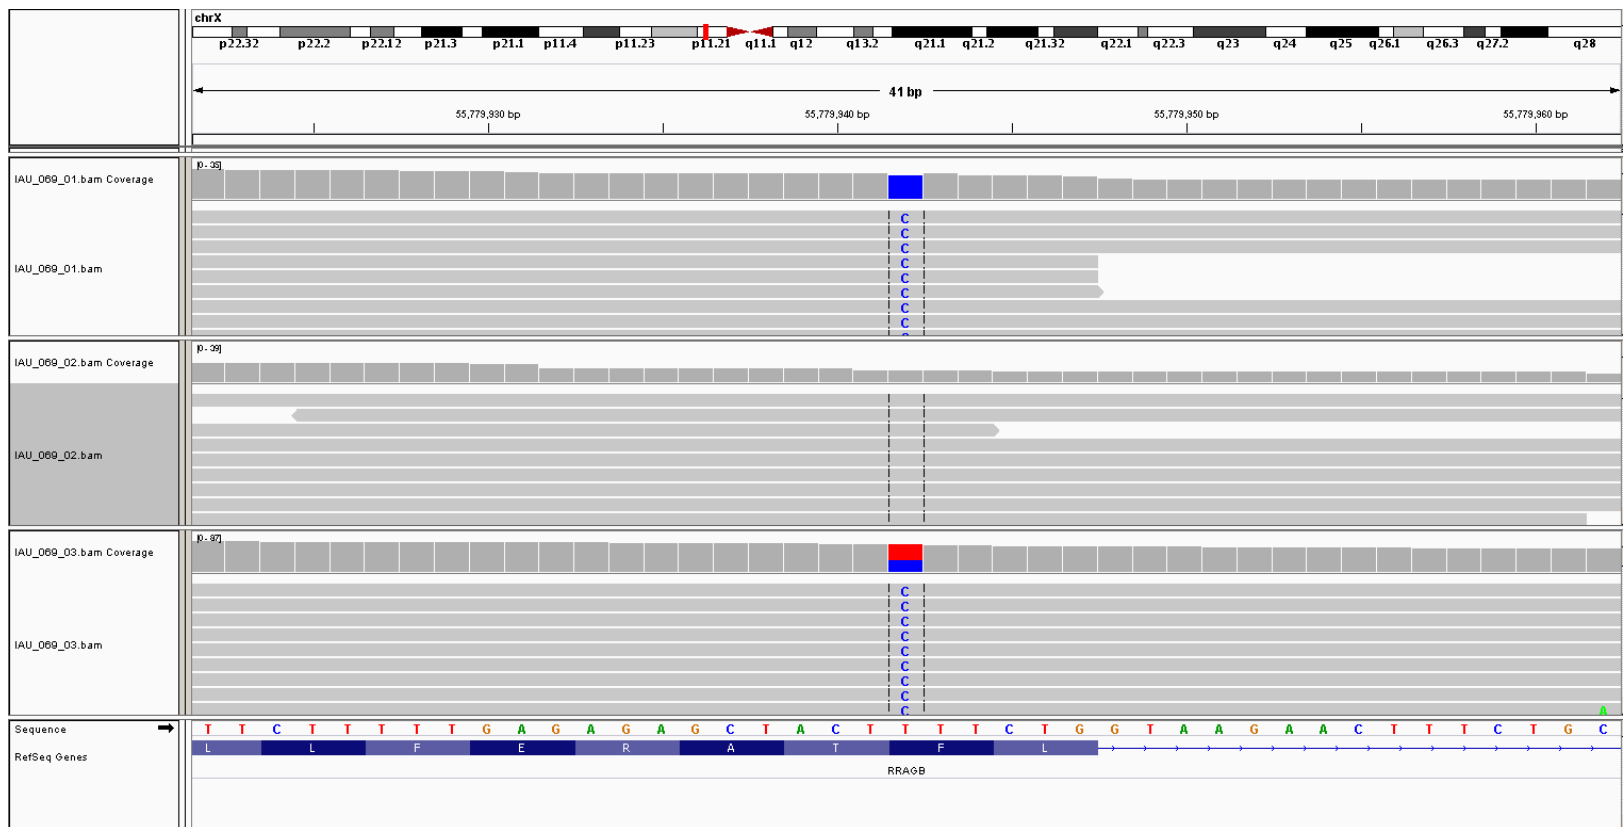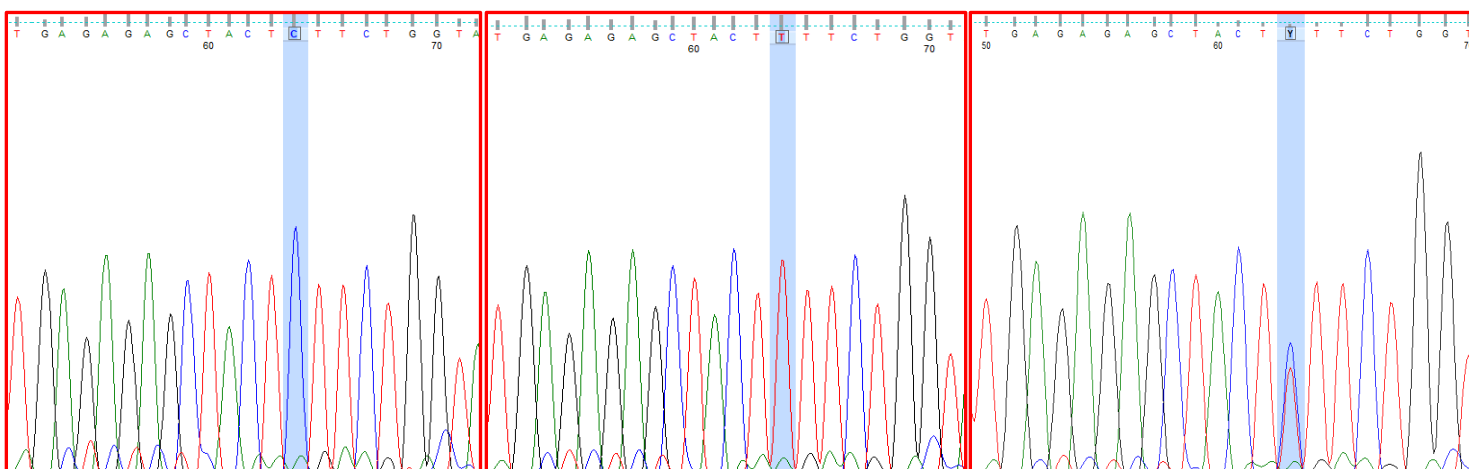

Proband

Father

Mother



#### 4. IAU45: MSN

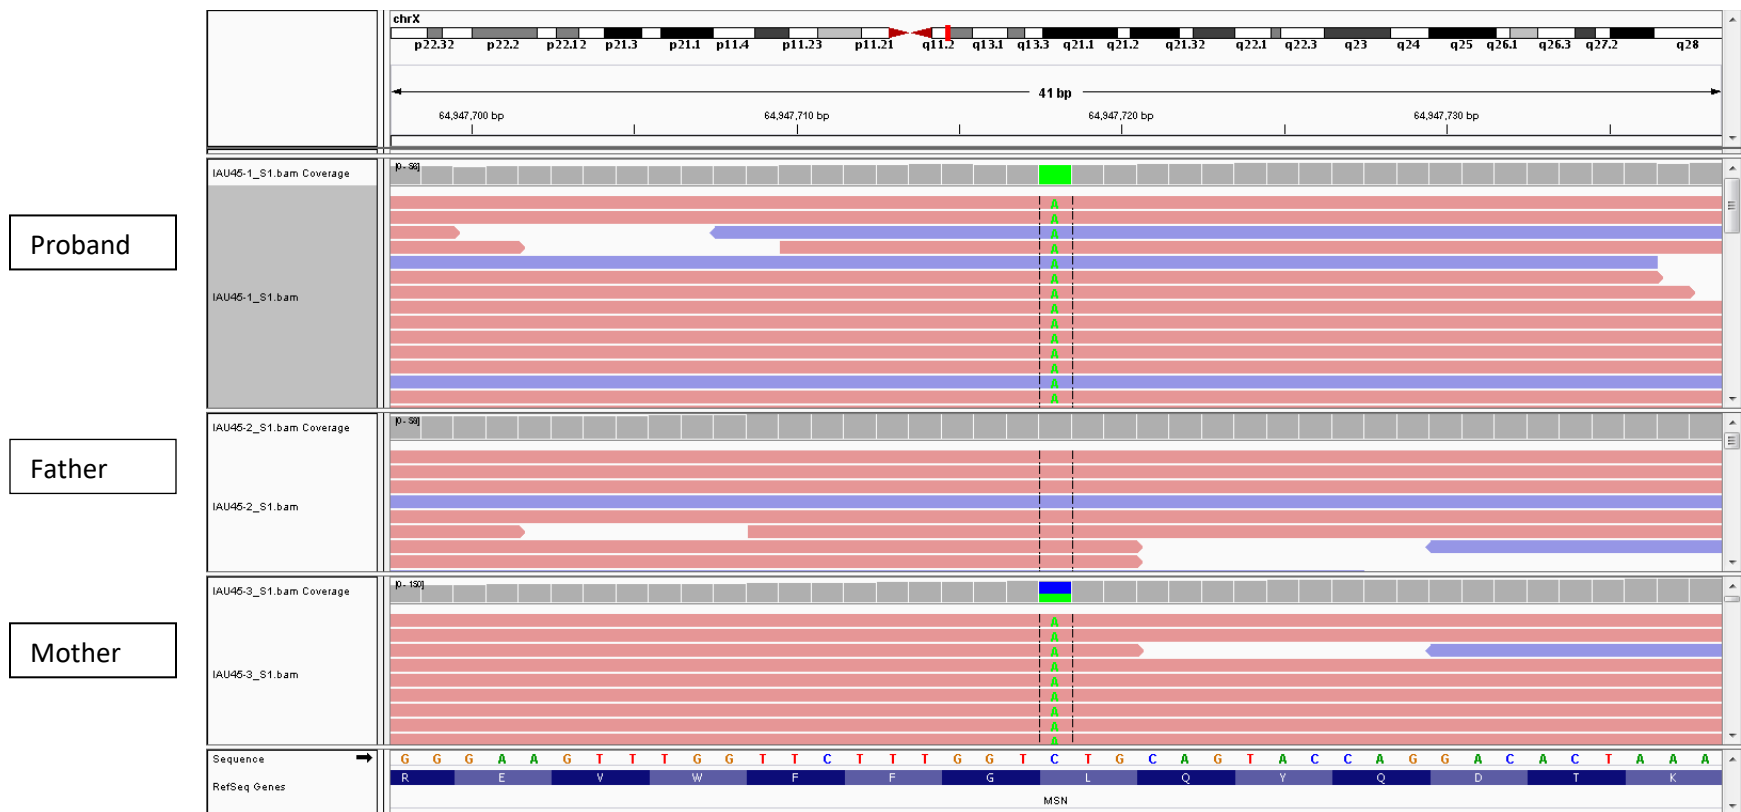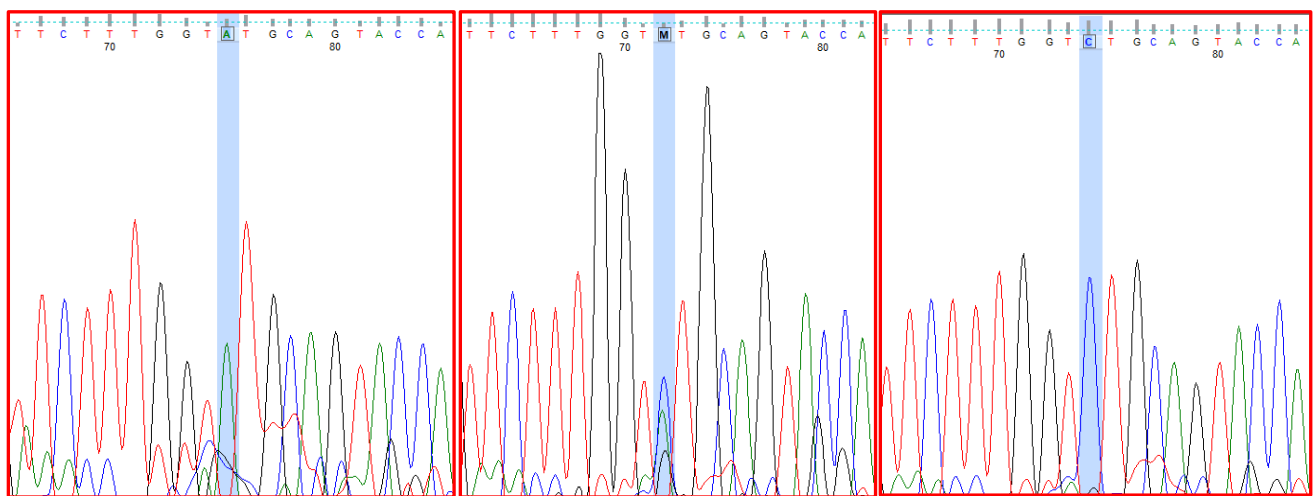

Proband

Father

Mother

## 5. SMPA15: NRK

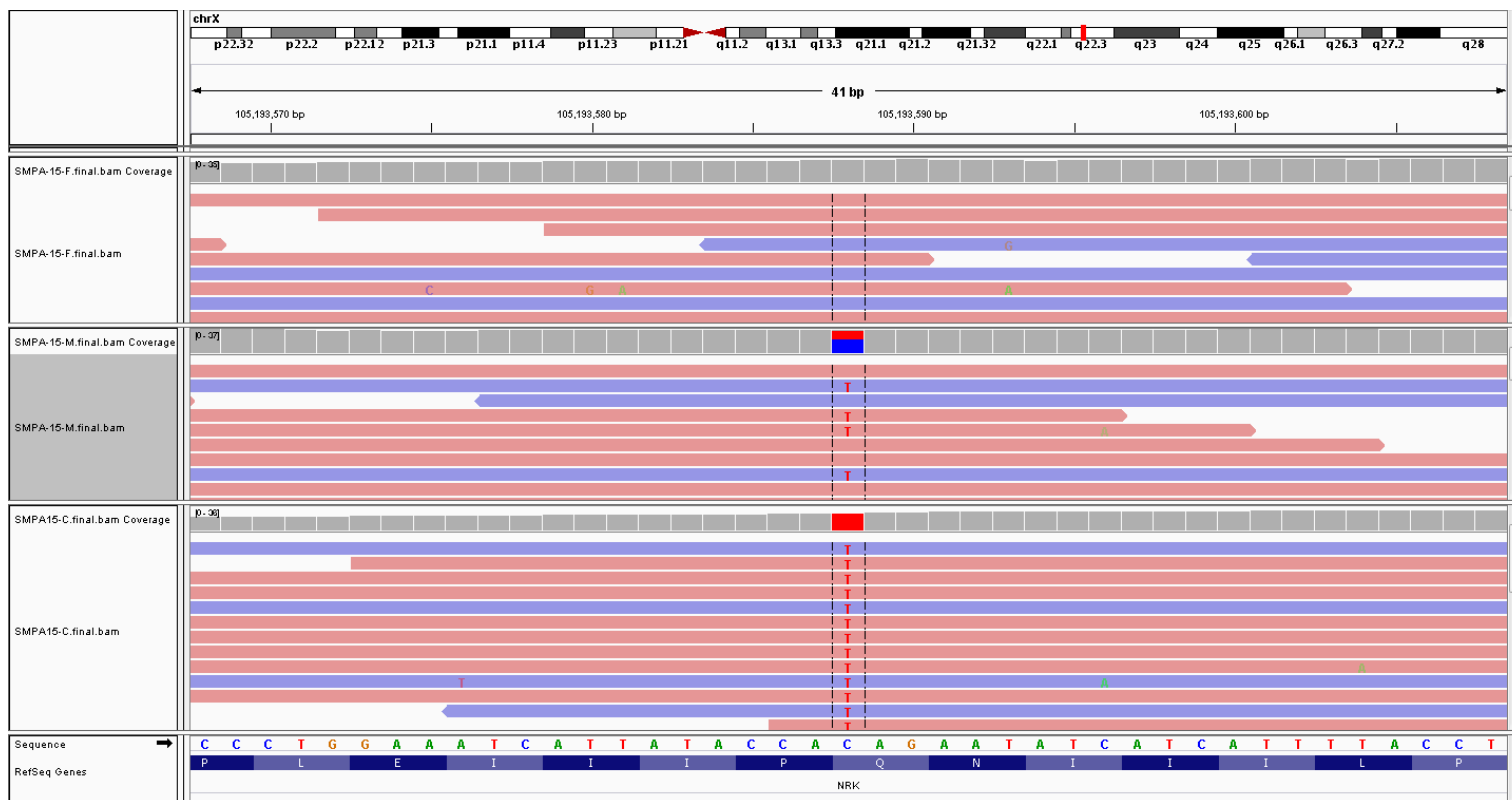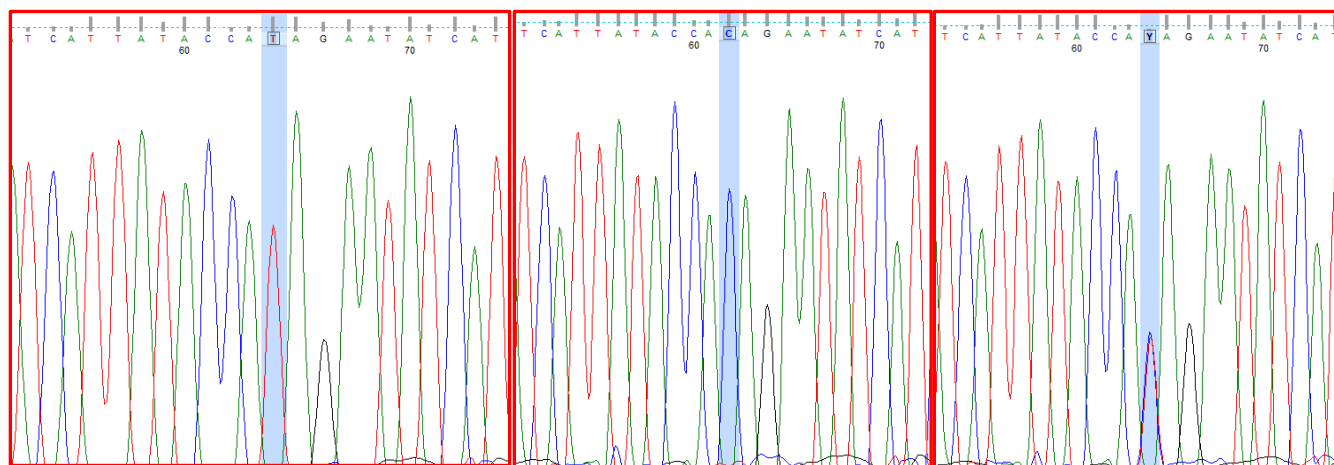

Proband

Father

Mother

6. IAU47: MID2

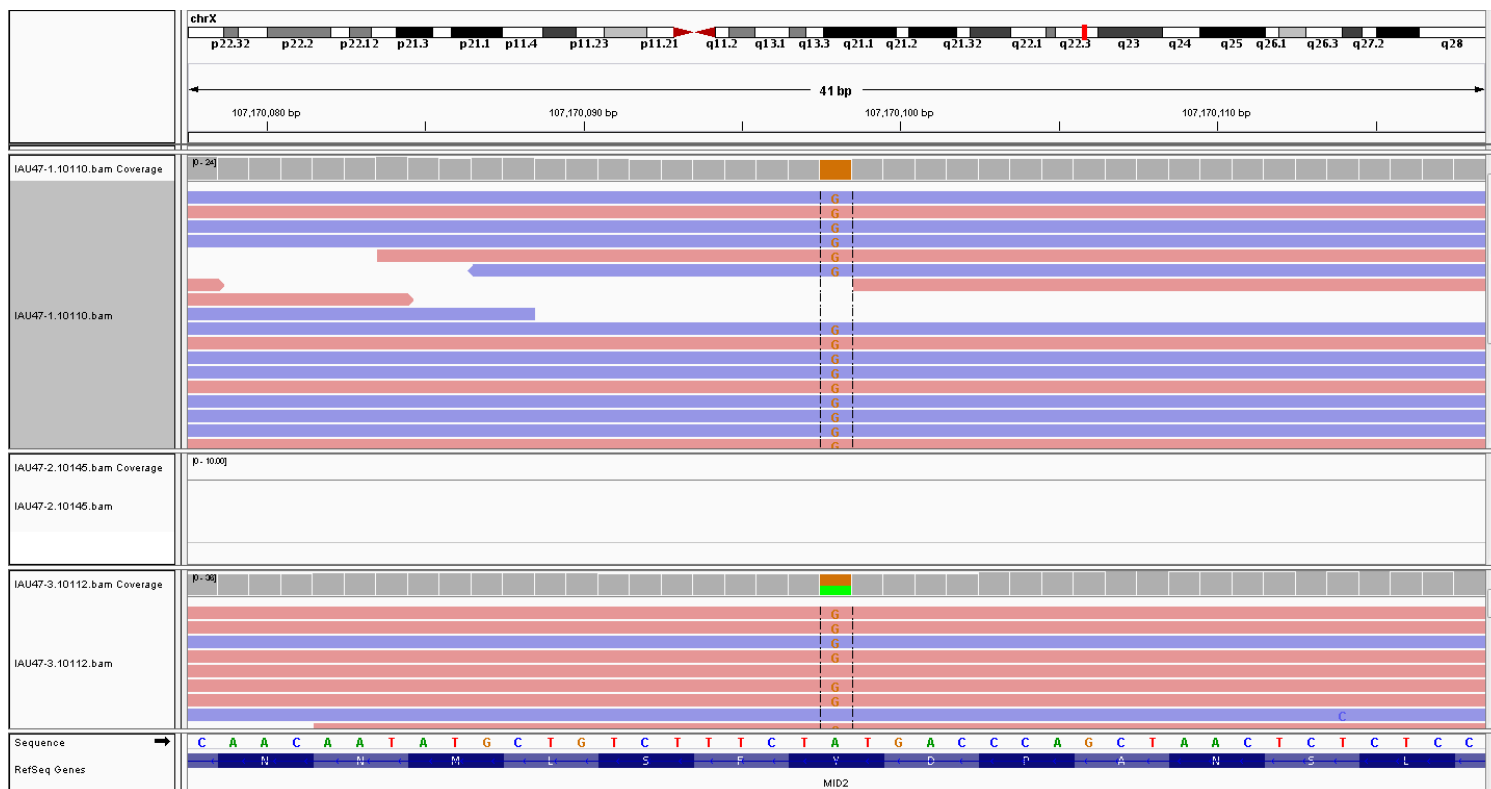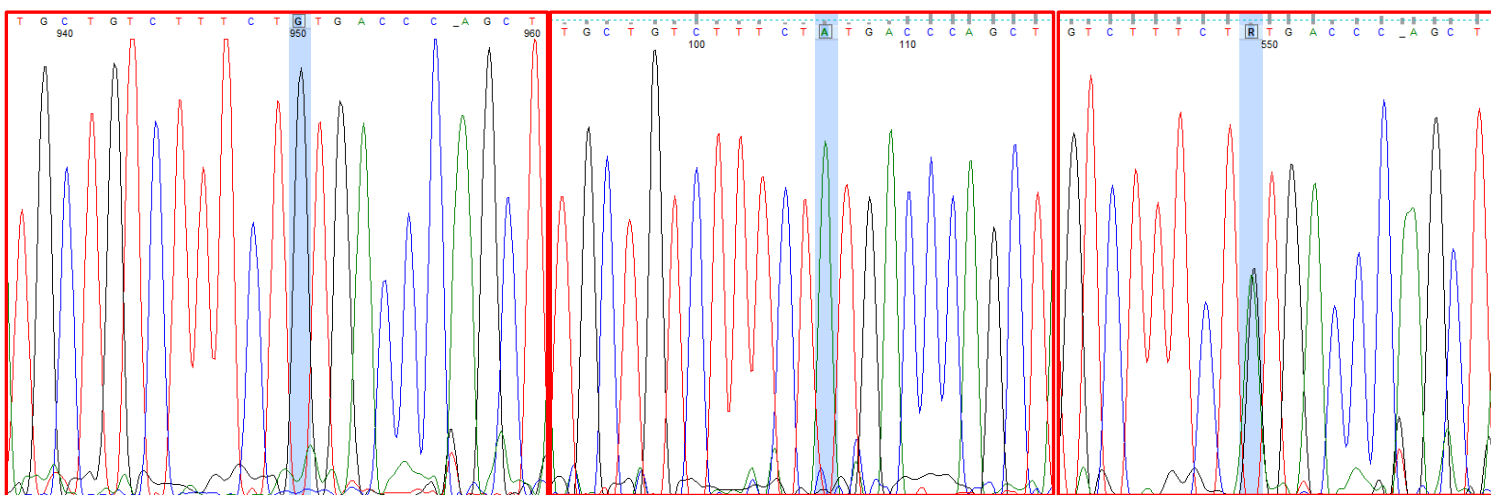

Proband

Father

Mother

7. IAU24: AIFM1

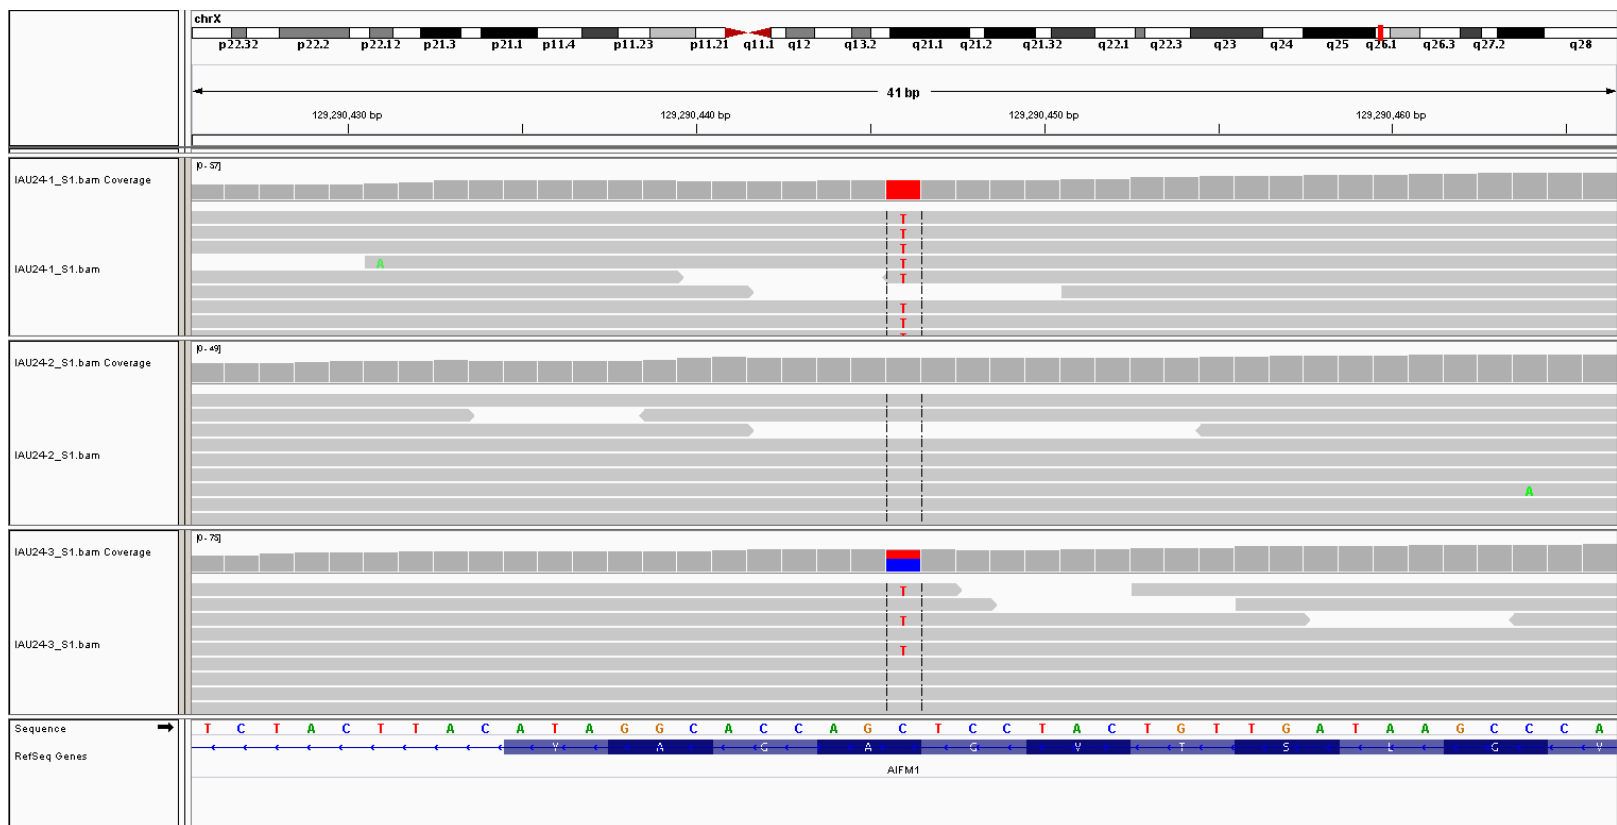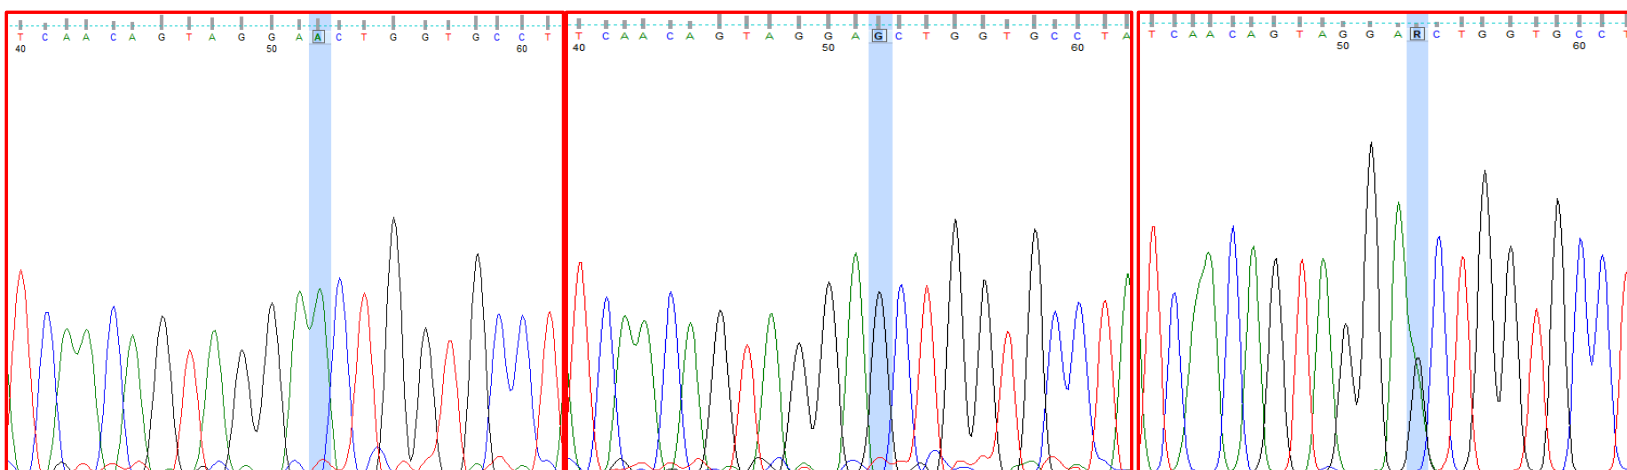

Proband

Father

Mother

8. IAU51: *MAGEC1*

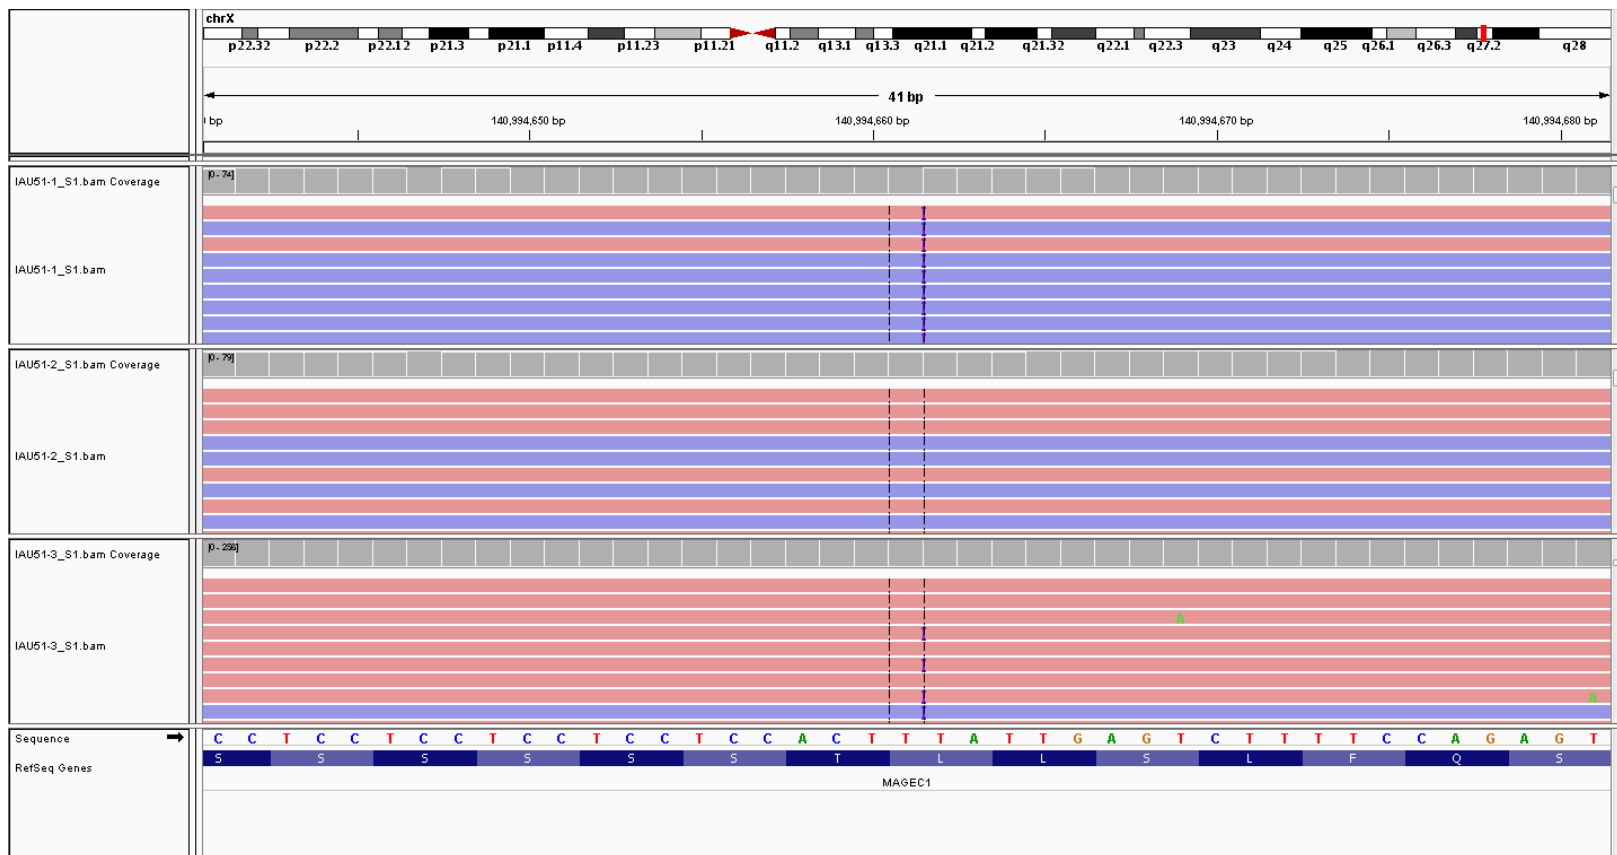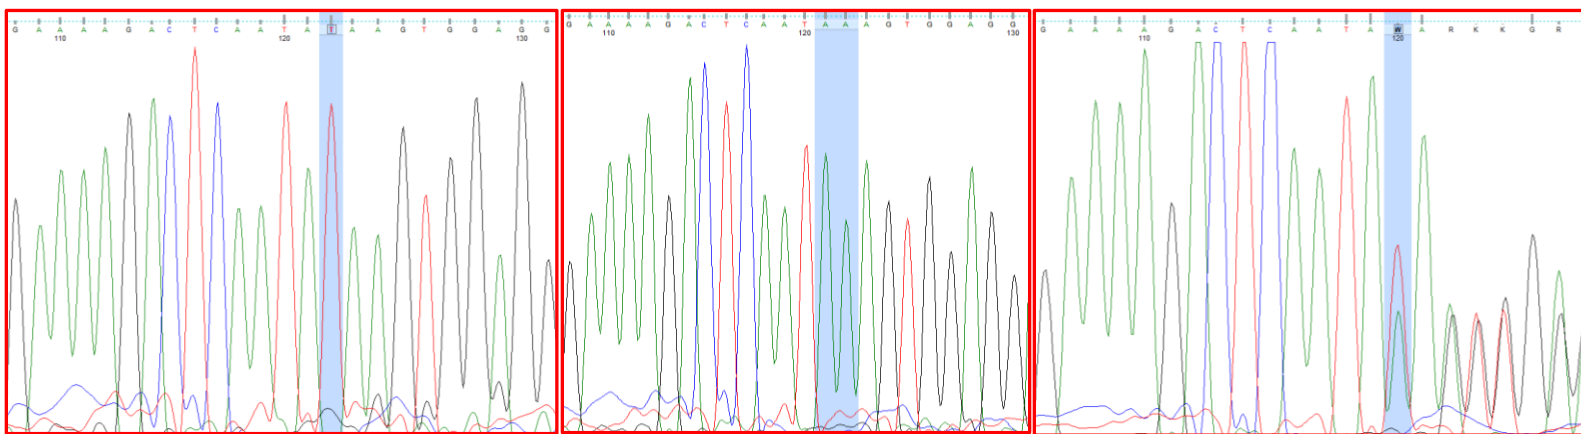

Proband

Father

Mother

# 9. IABB8: ZNF185

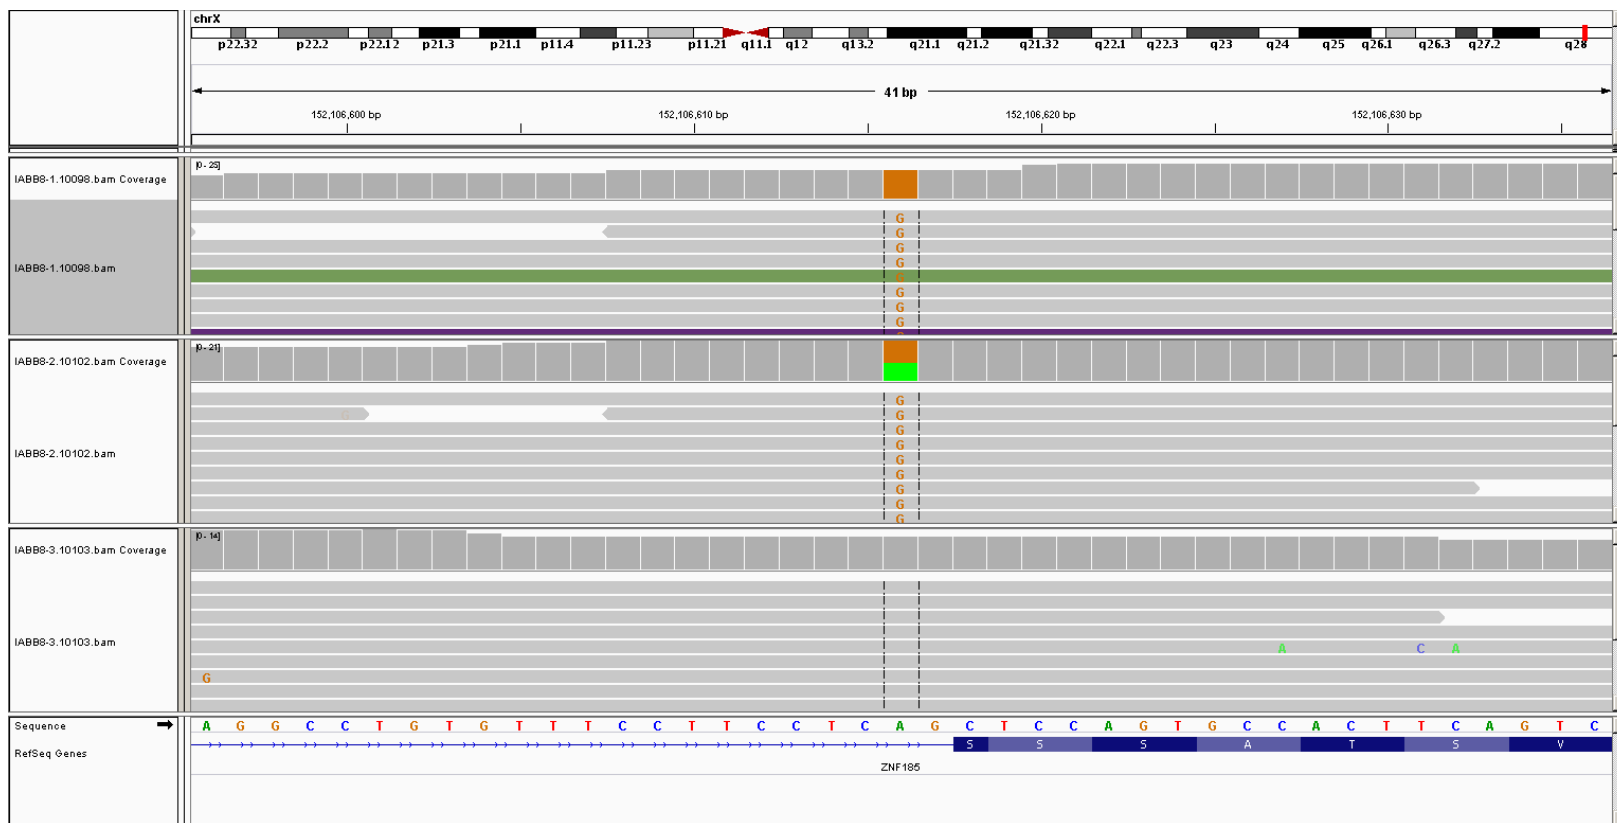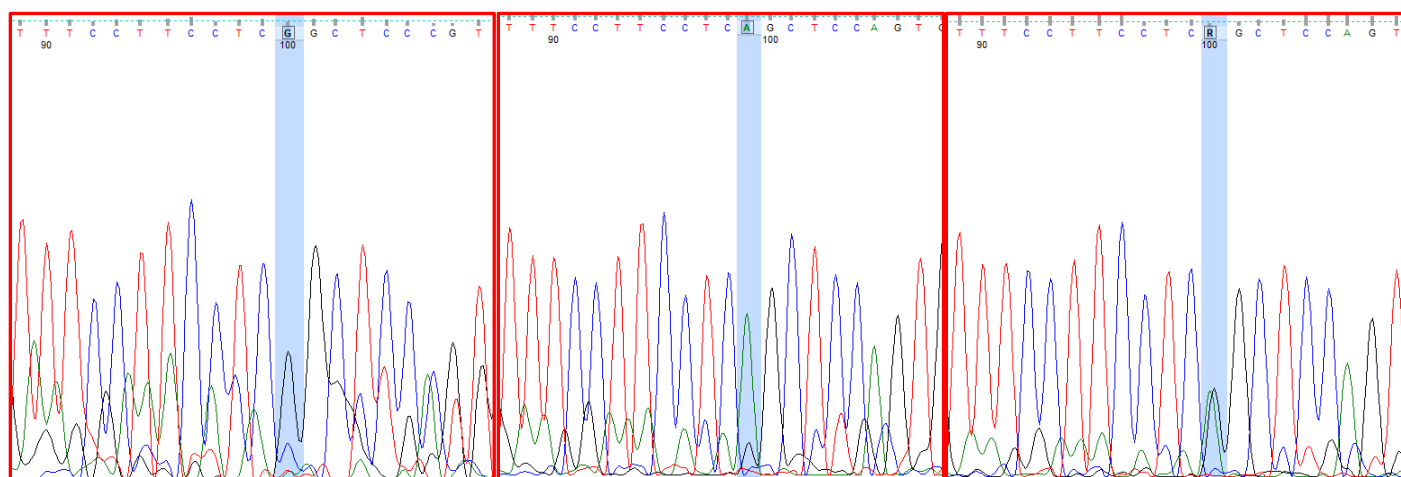

Proband

Father

Mother

10. SA1: *CLTRN* (*TMEM27*)- de novo

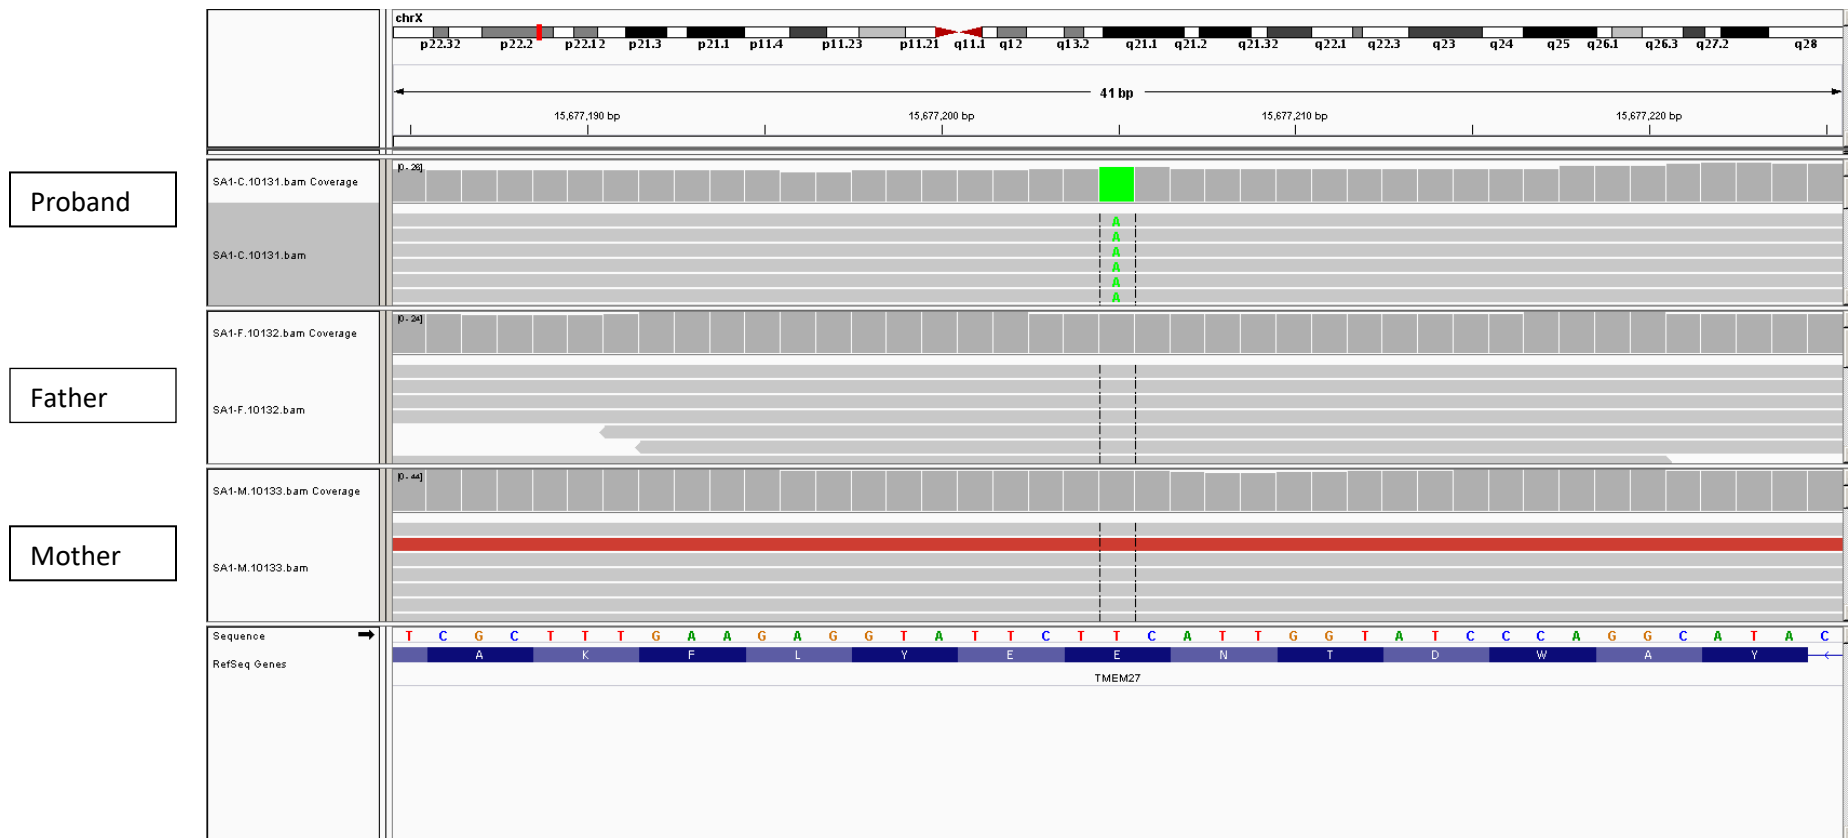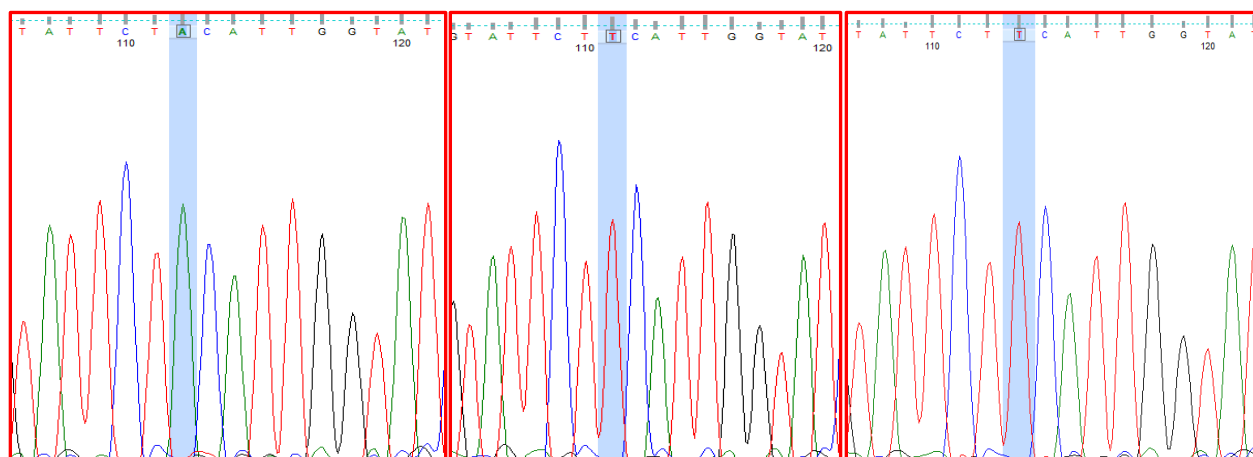

Proband

Father

Mother

# 11. SMPA71: ARHGEF9

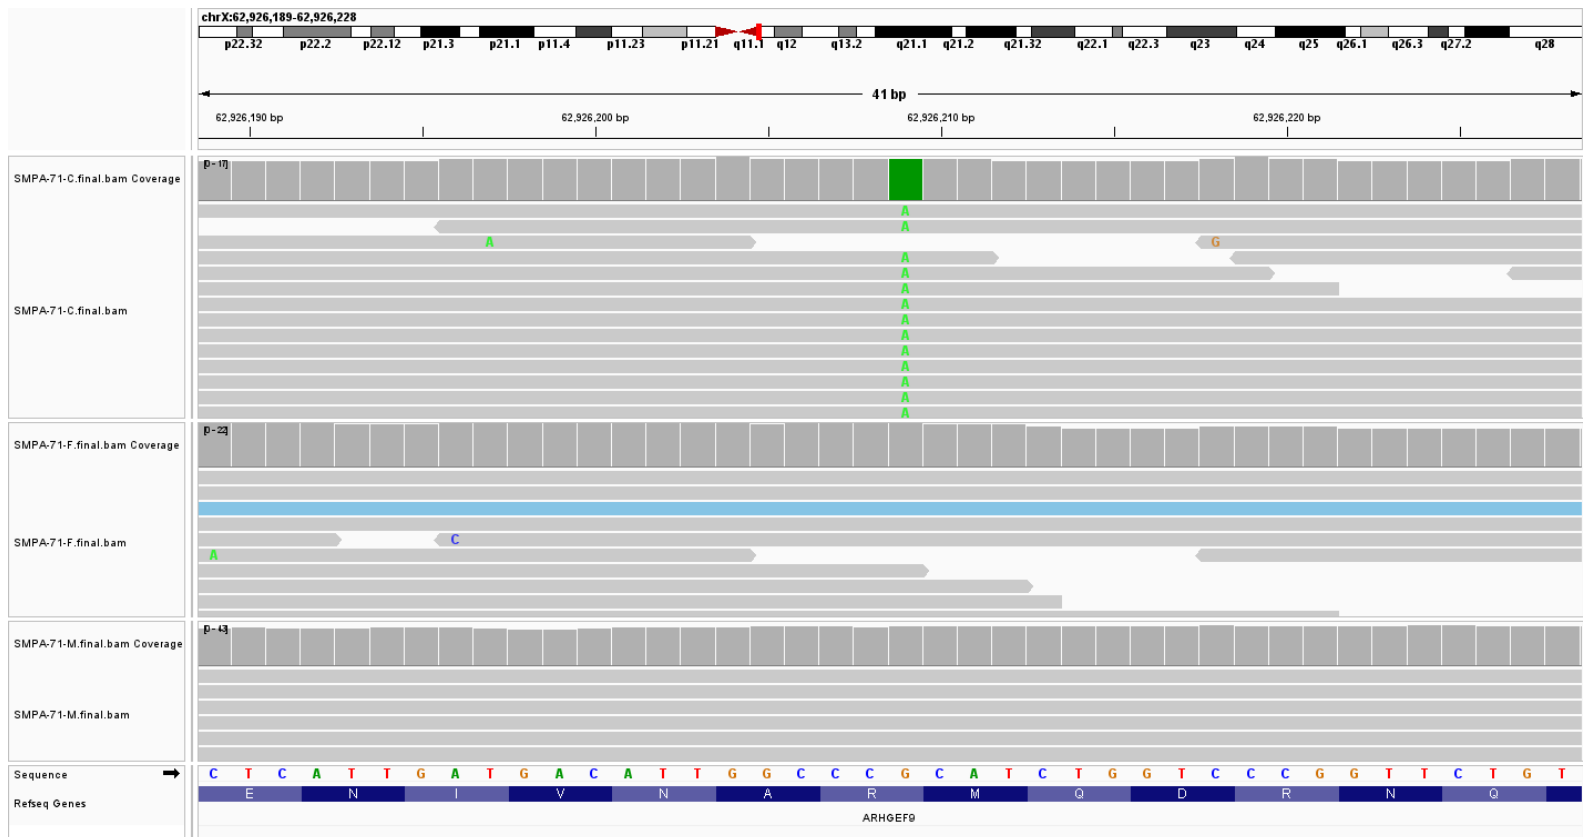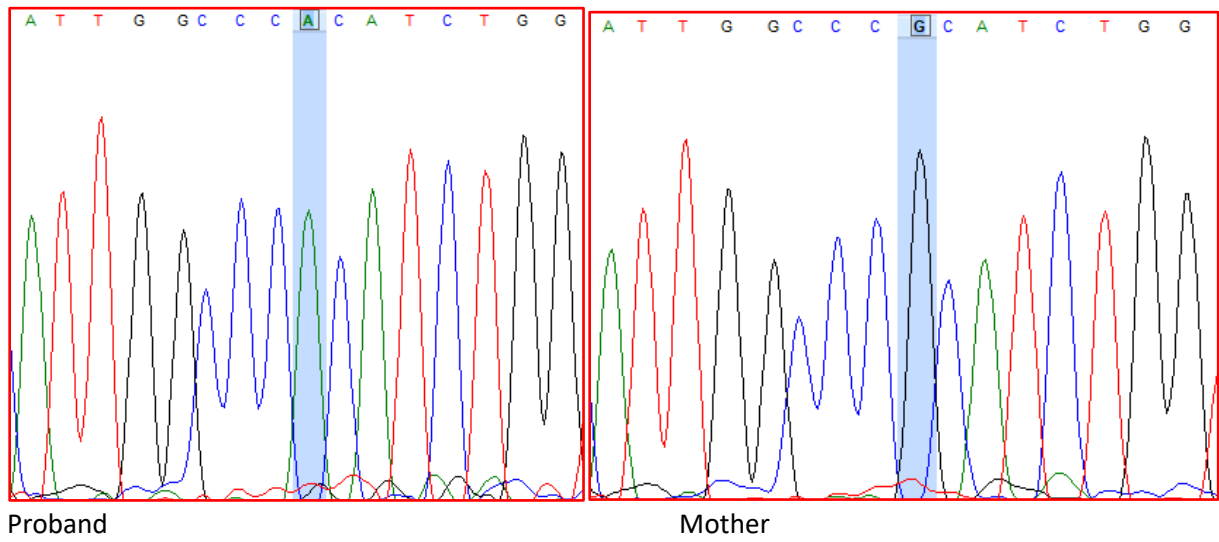



12. SMPA84: *DRP2*

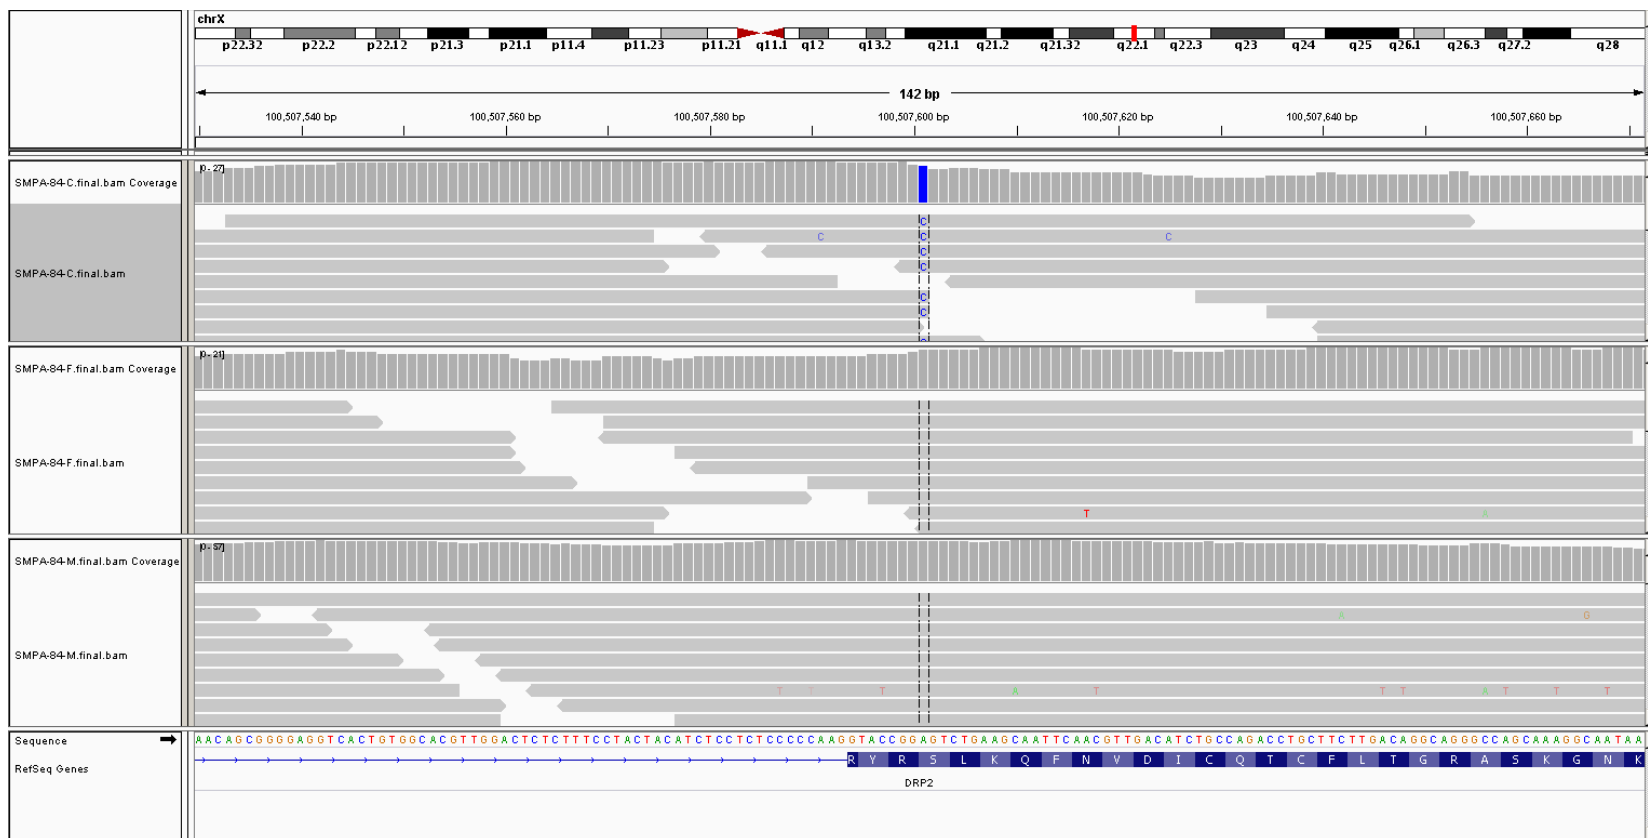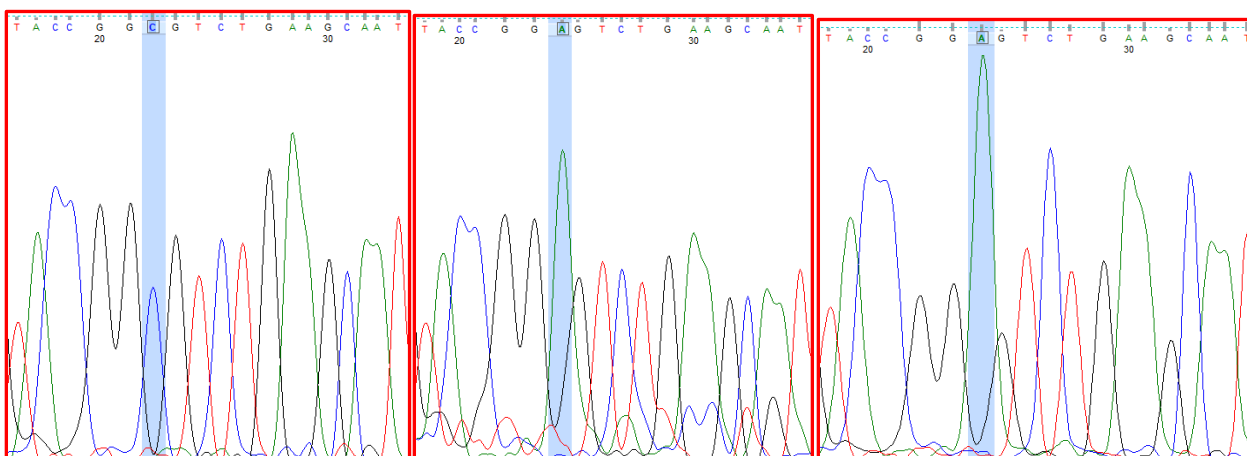

Proband

Father

Mother

13. IAU54: MECP2- de novo

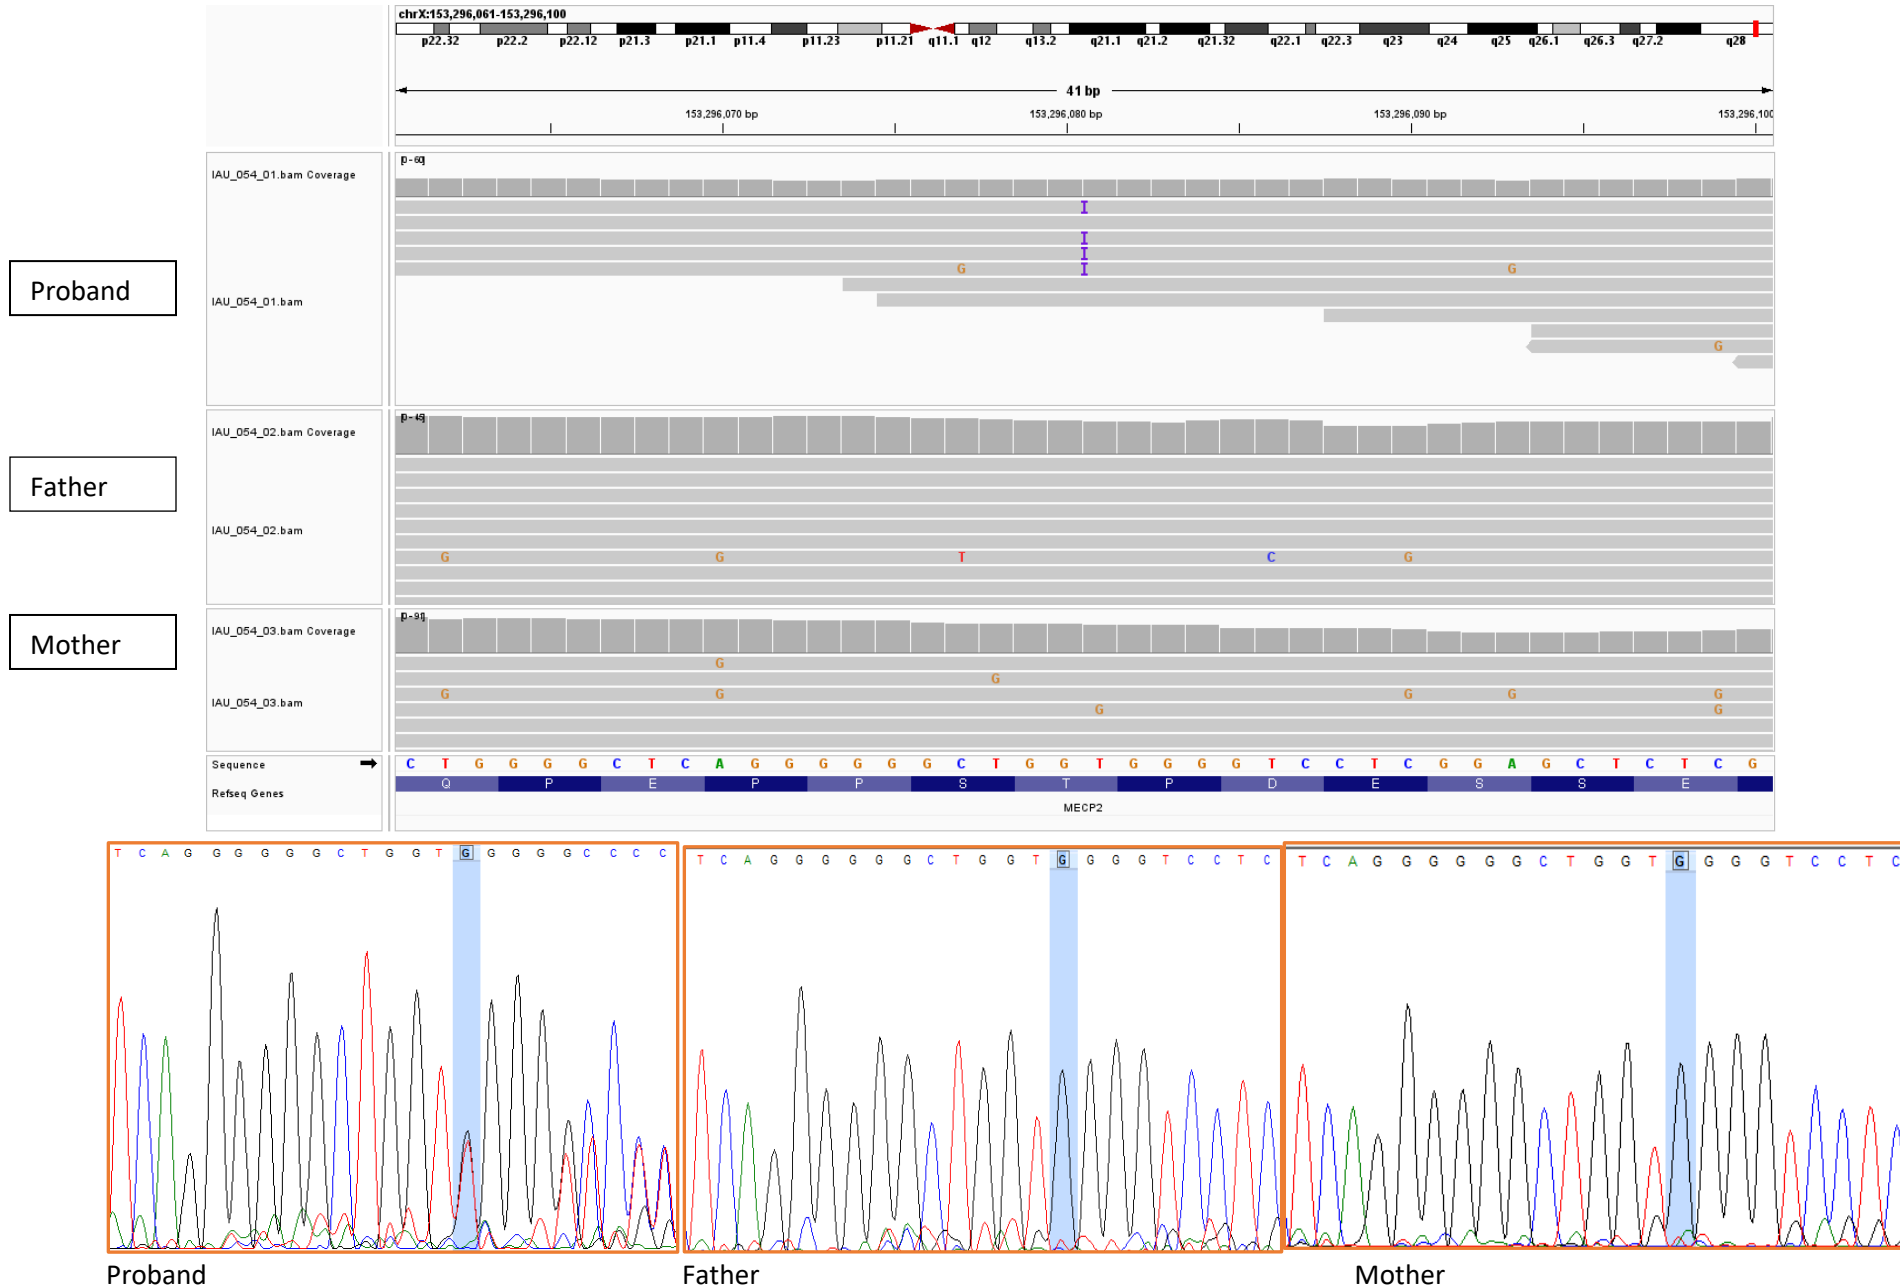

14. SMPA78: *MECP2*- de novo

Proband

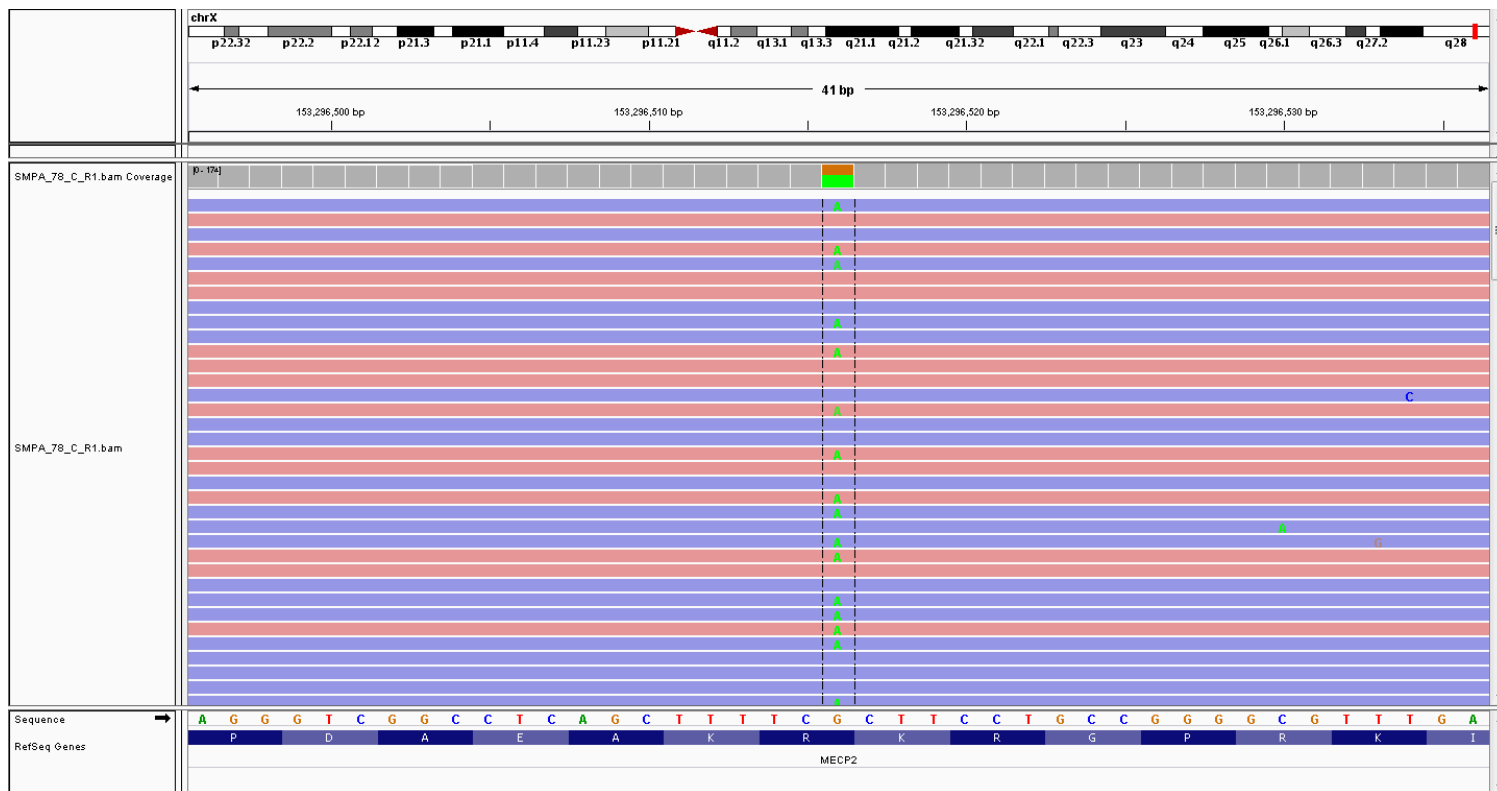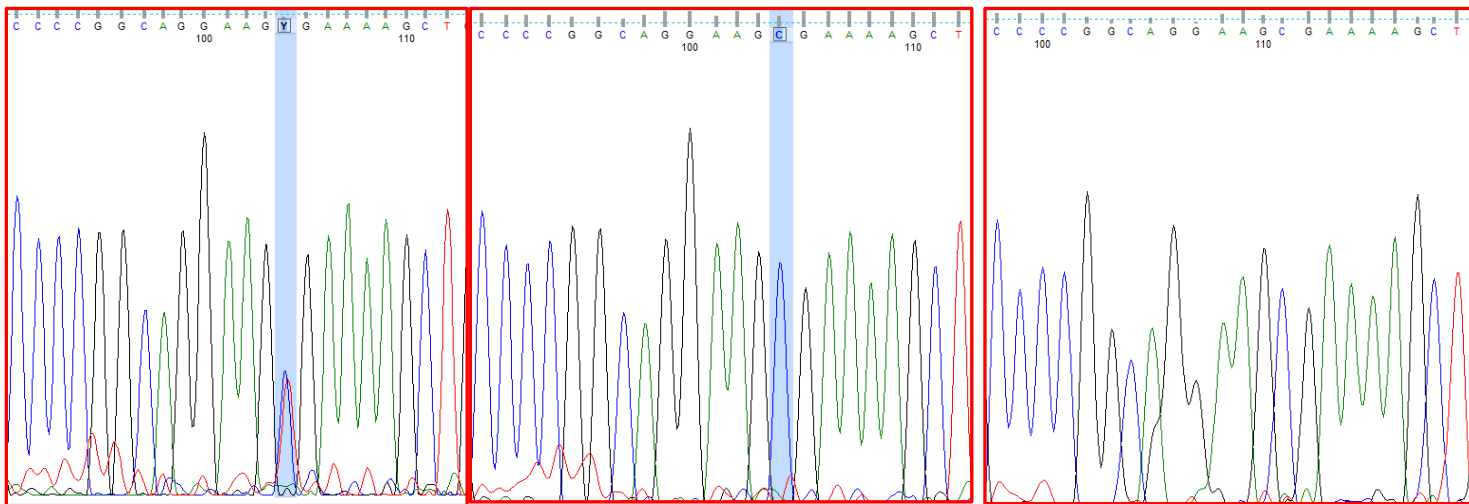

Proband

Father

Mother

Table 5: Biallelic loss CNVs

1. SMPA4: 14q11.2: *DHRS4/DHRS4L*

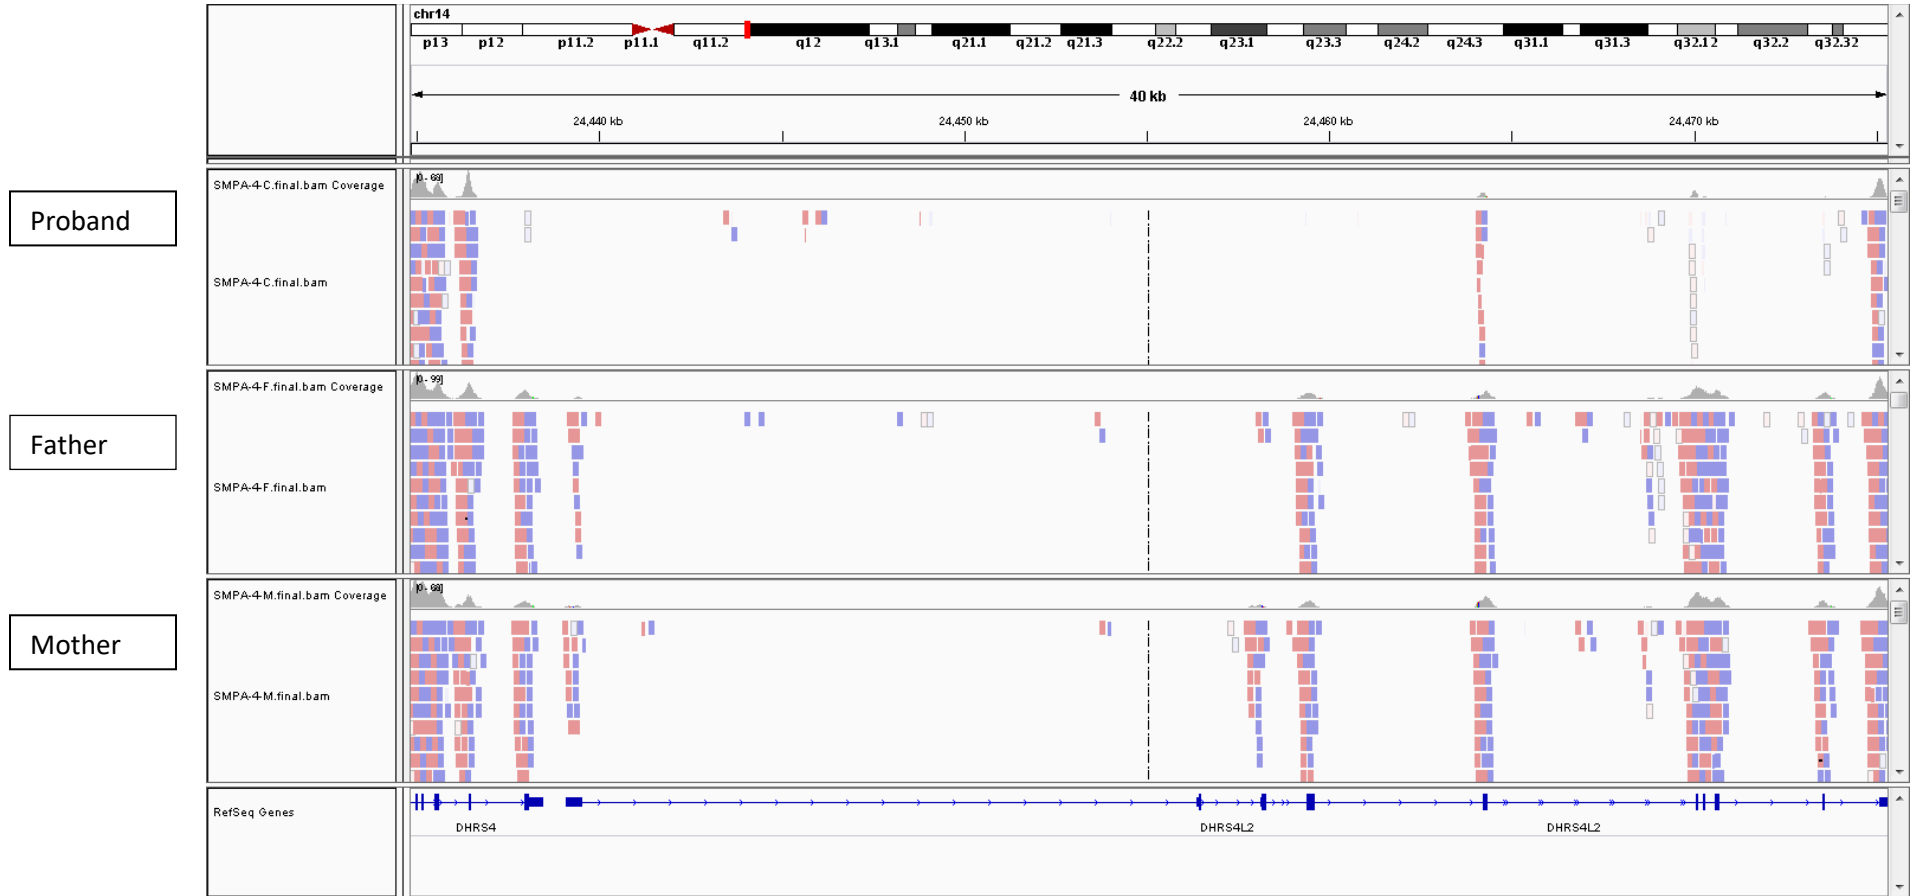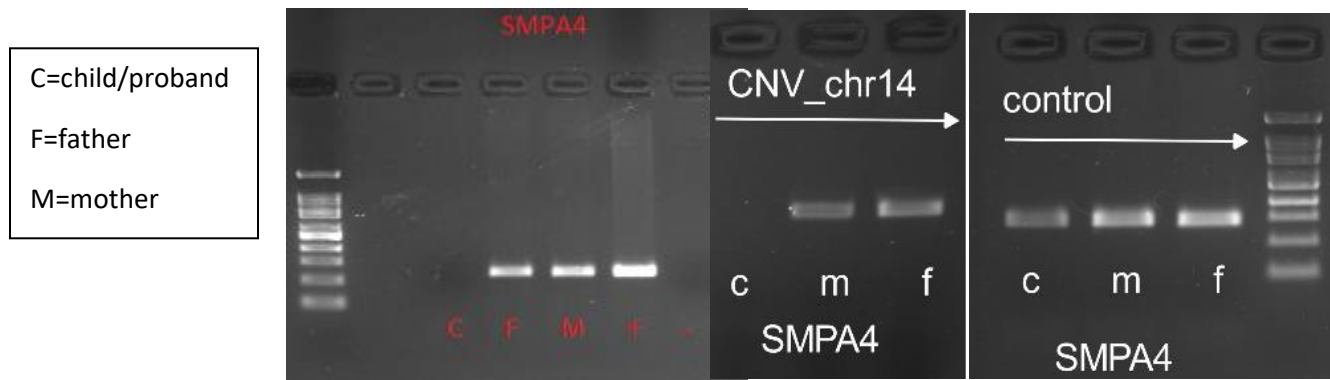

## 2. SMPA4: SEMG1

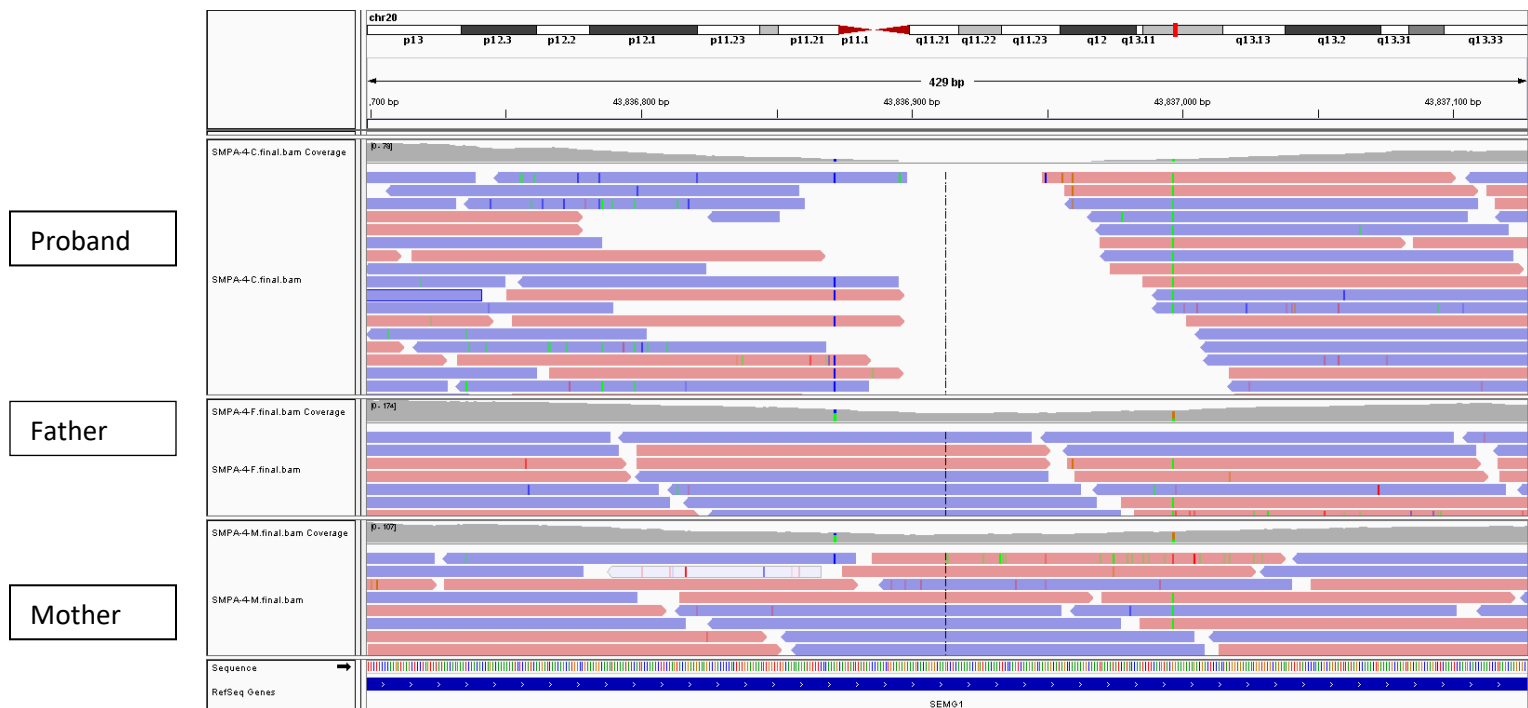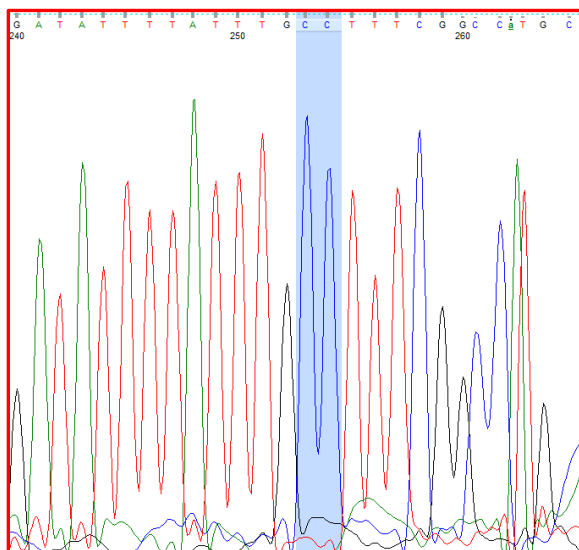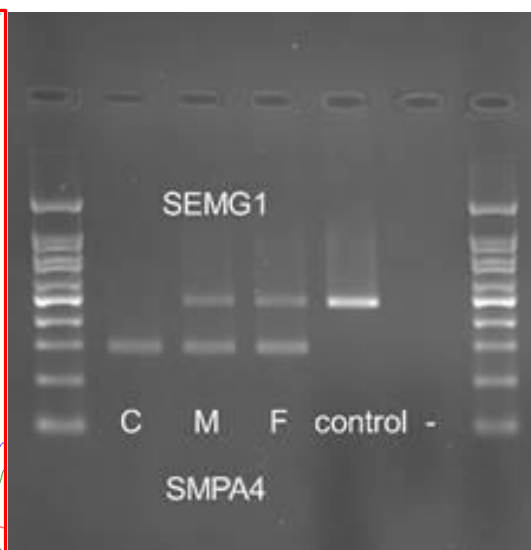

Proband (showing 180bp deletion junction)

### 3. SMPA8: 2q32.2: DNAH7

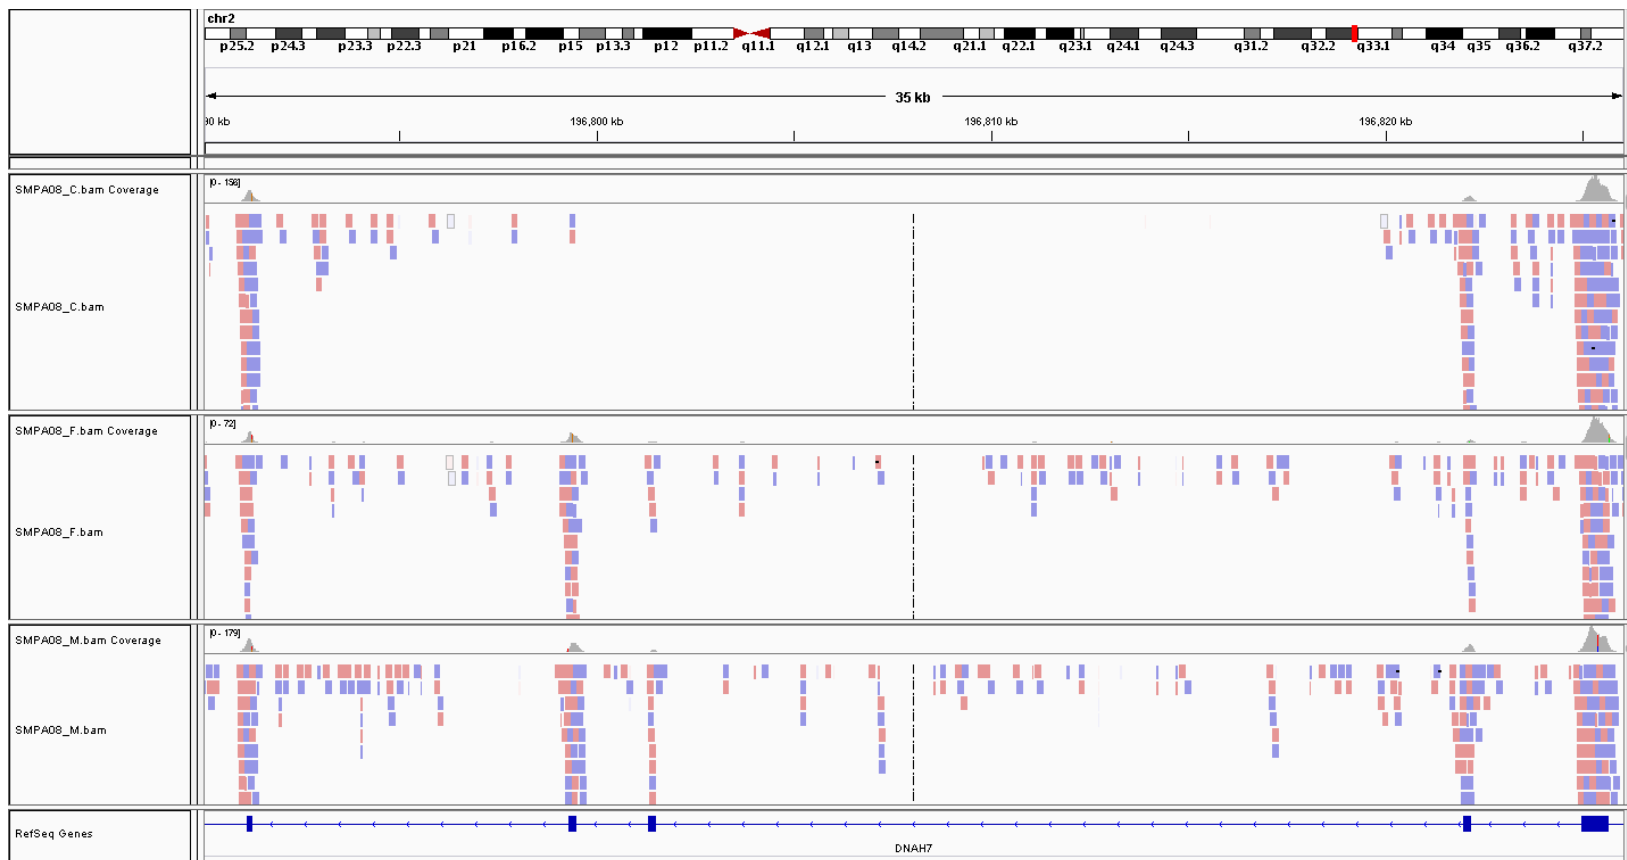

C=child/proband  
F=father  
M=mother

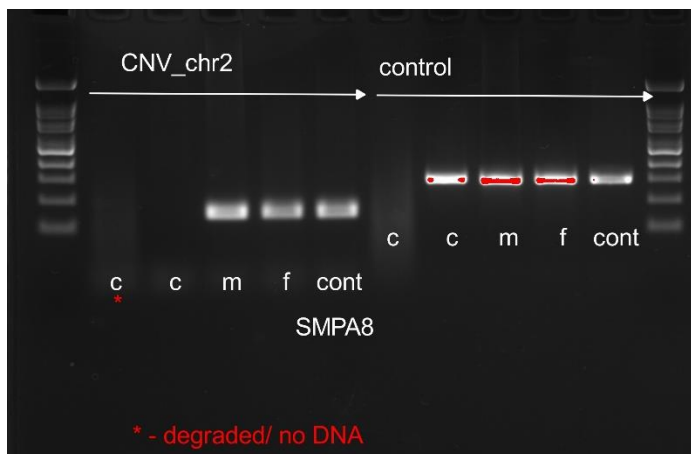

4. SMPA3: 5q31.3: *PCDHA9*, *PCDHA10*

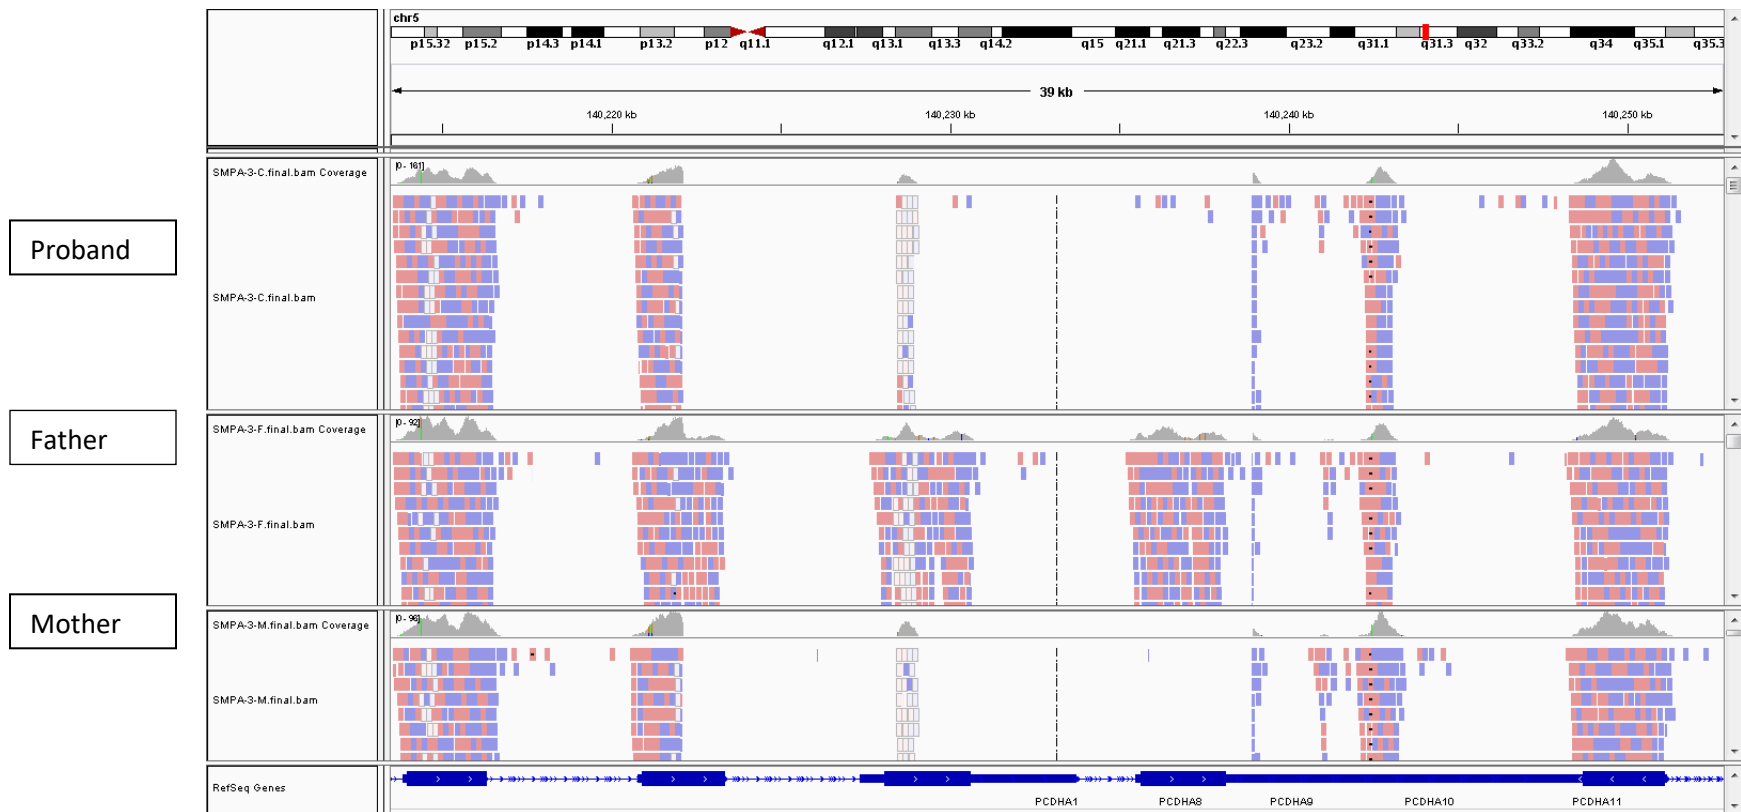

C=child/proband  
 F=father  
 M=mother

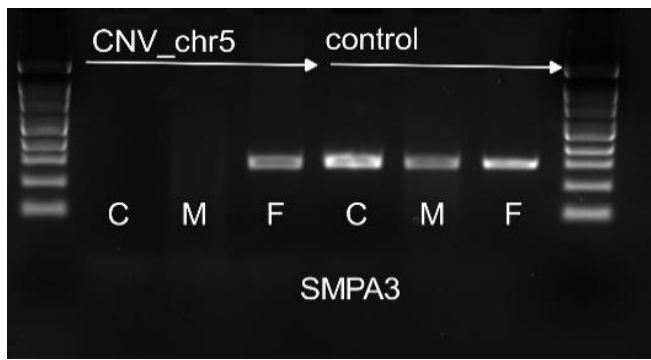

5. IAH2: 5q31.3: *PCDHA9*, *PCDHA10*

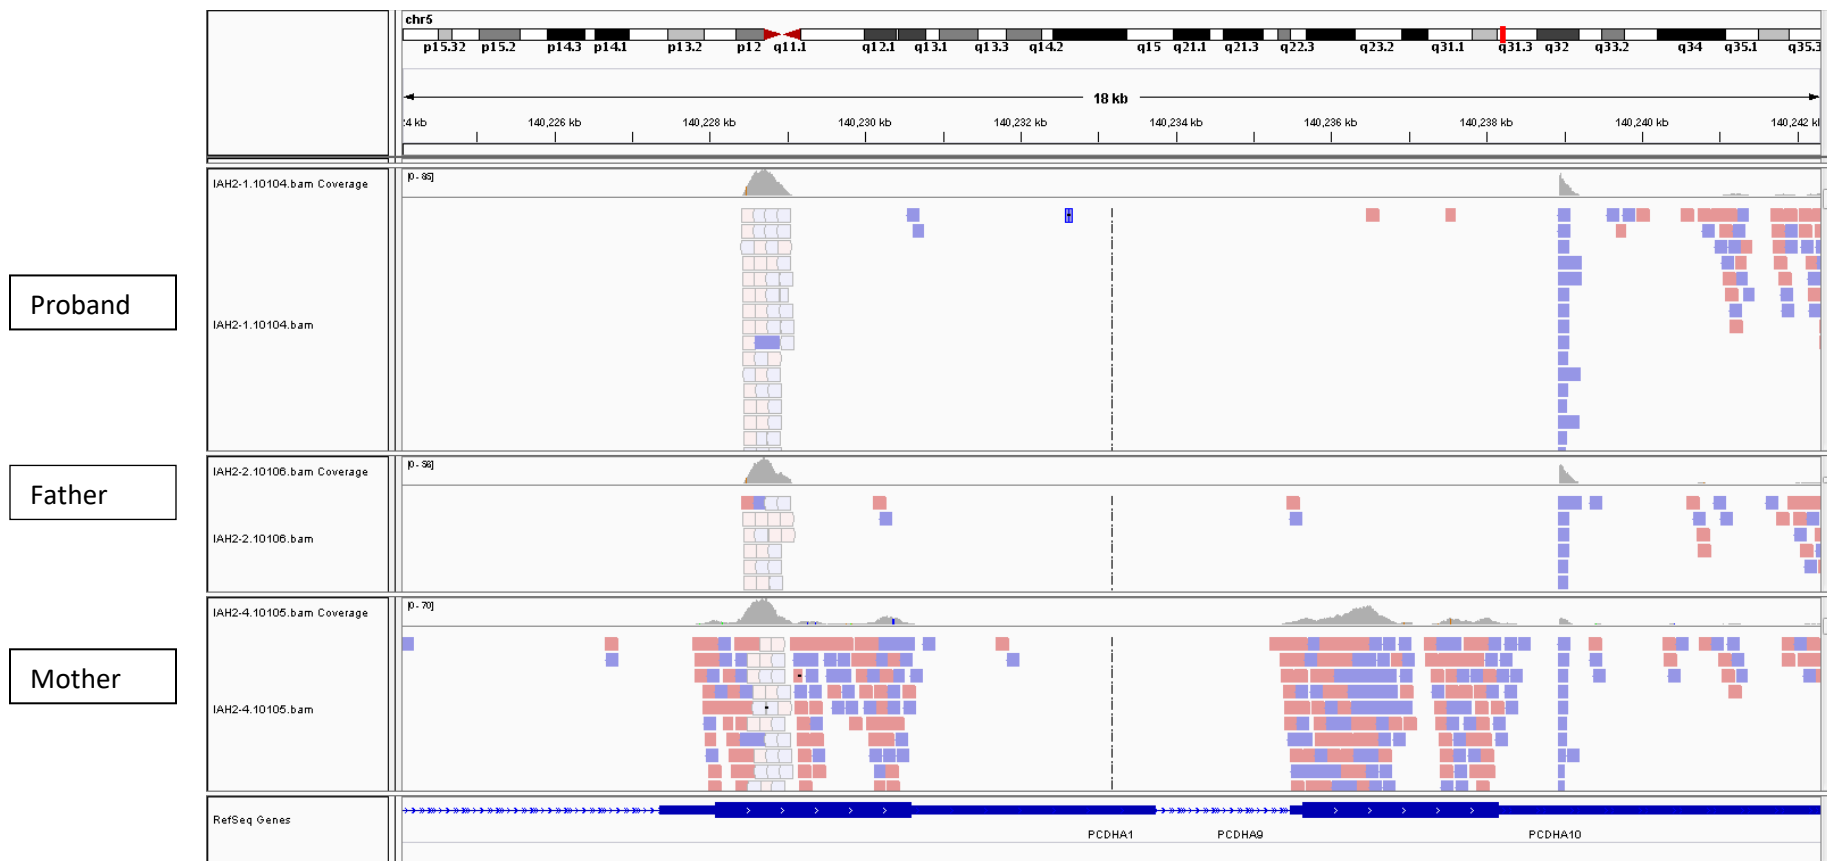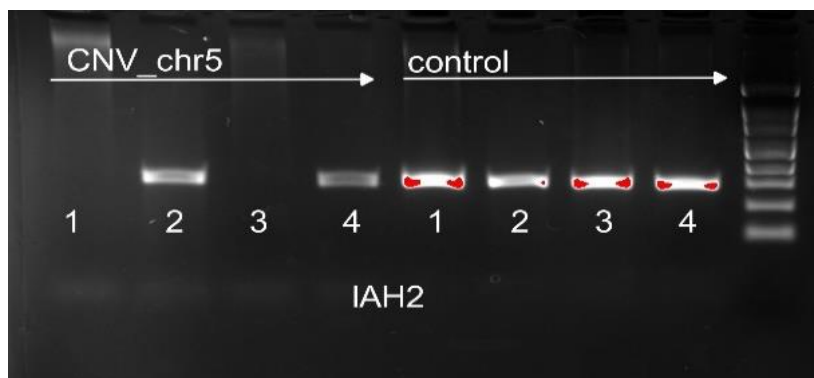

1=proband; 2=unaffected brother; 3=father; 4=mother



6. IAU79: 20p13: *SIRPB1*

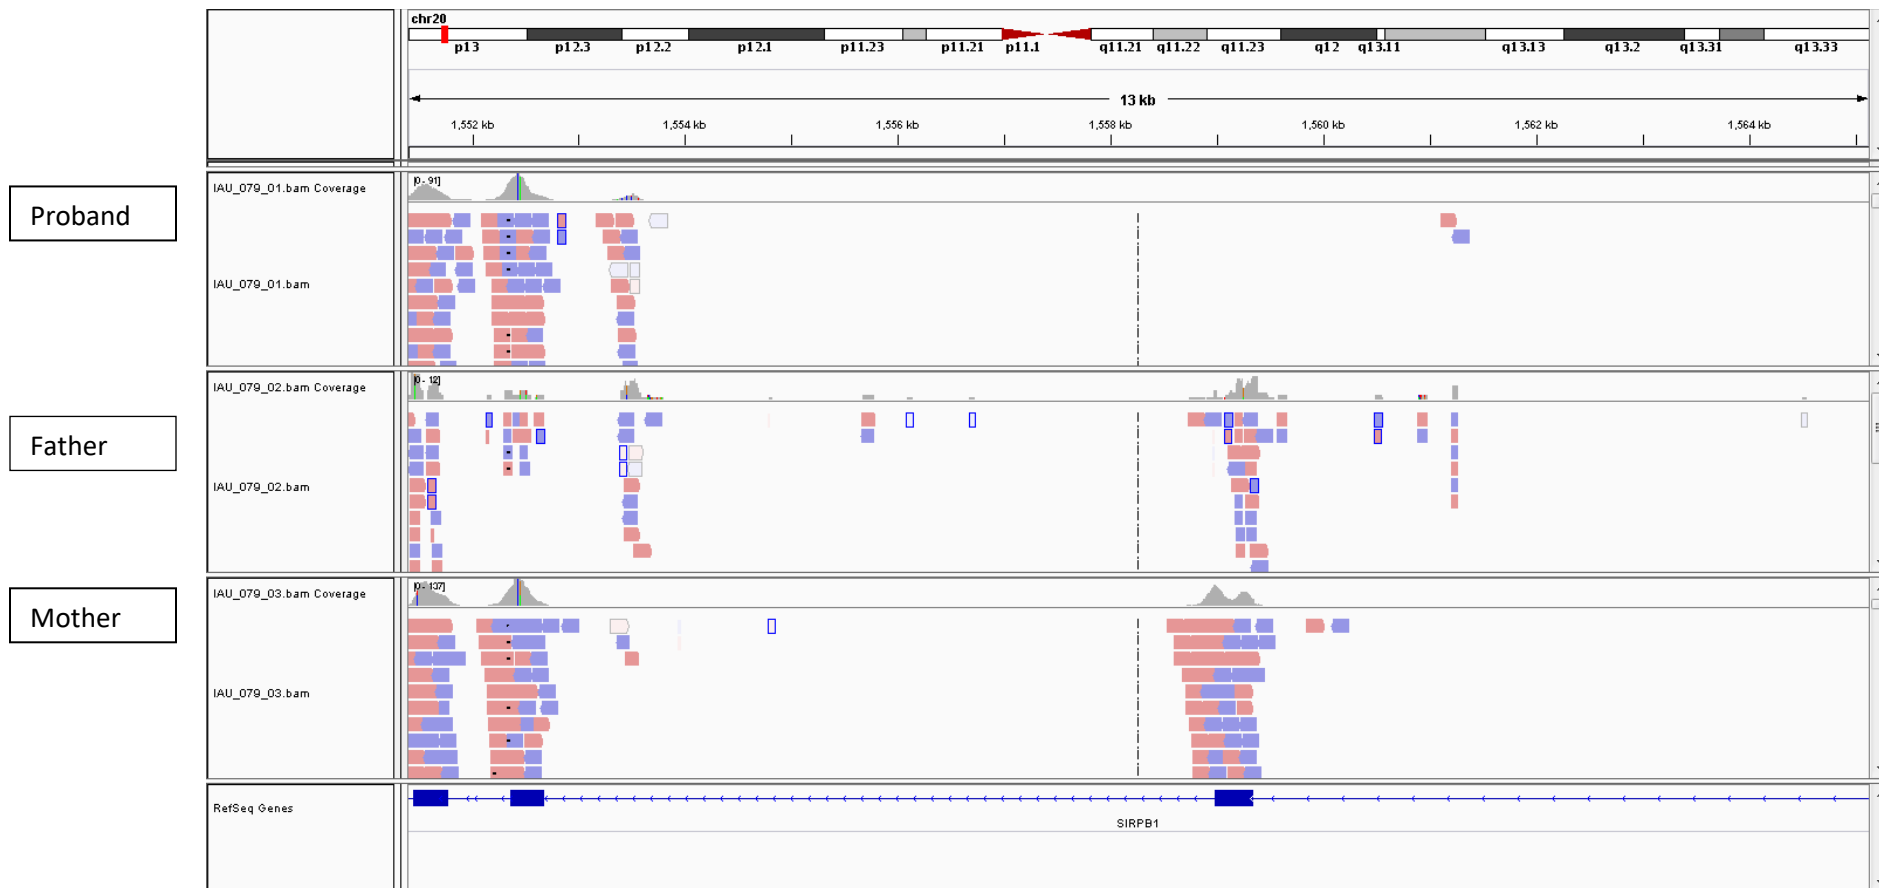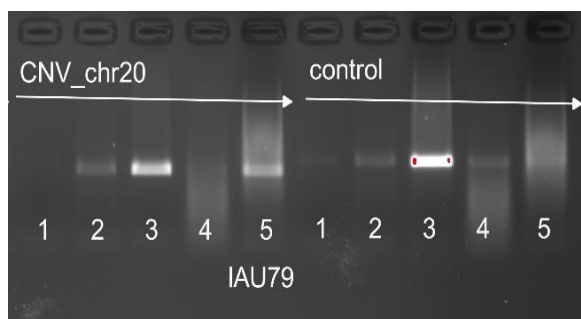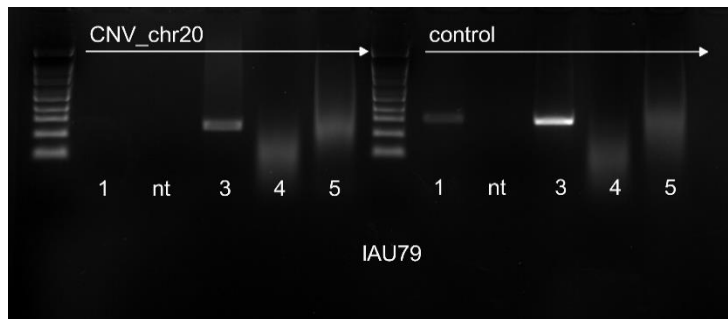

7. IABB2: 17p13.2: *SHPK* (validated by PCR and qPCR)

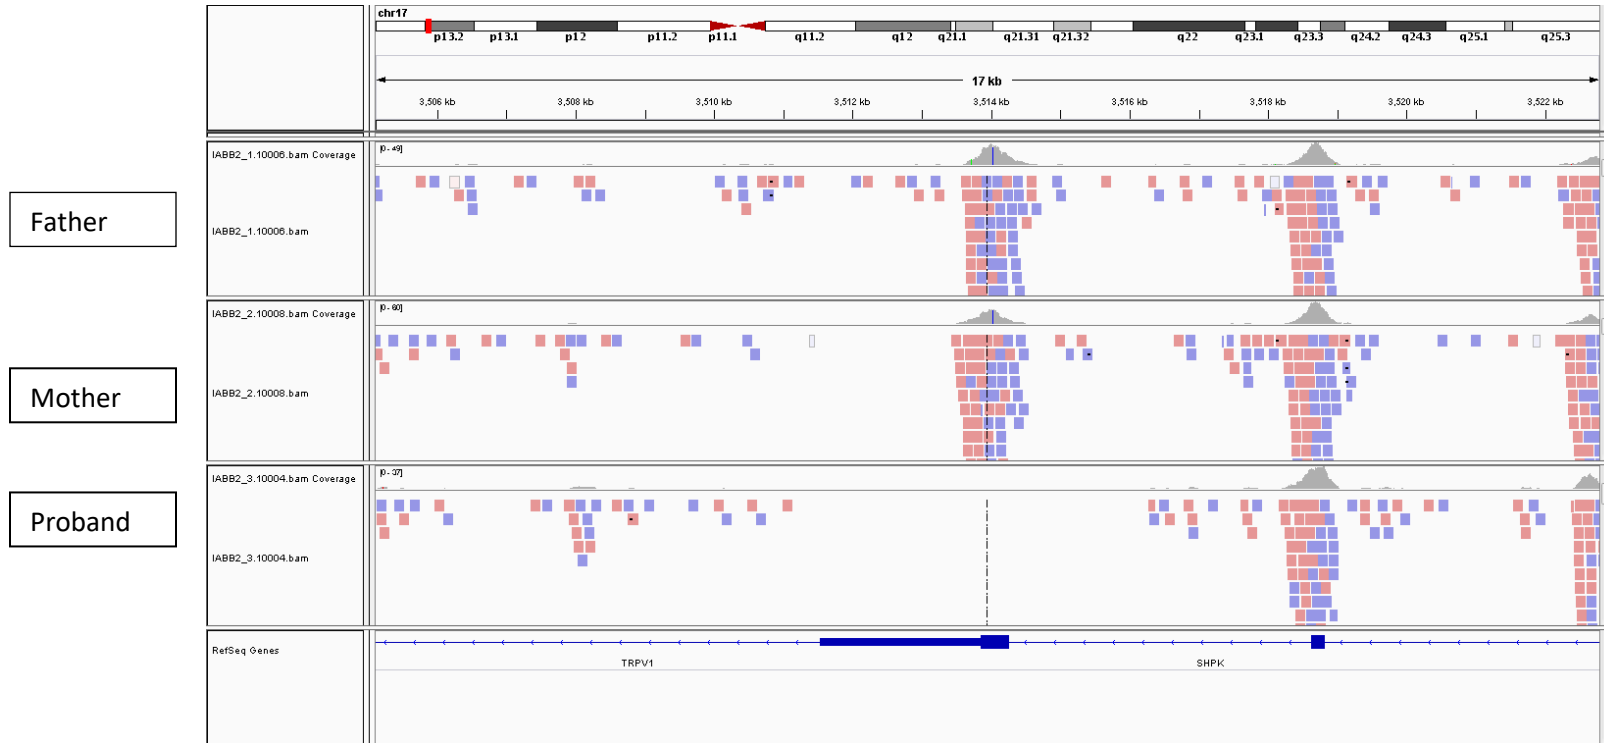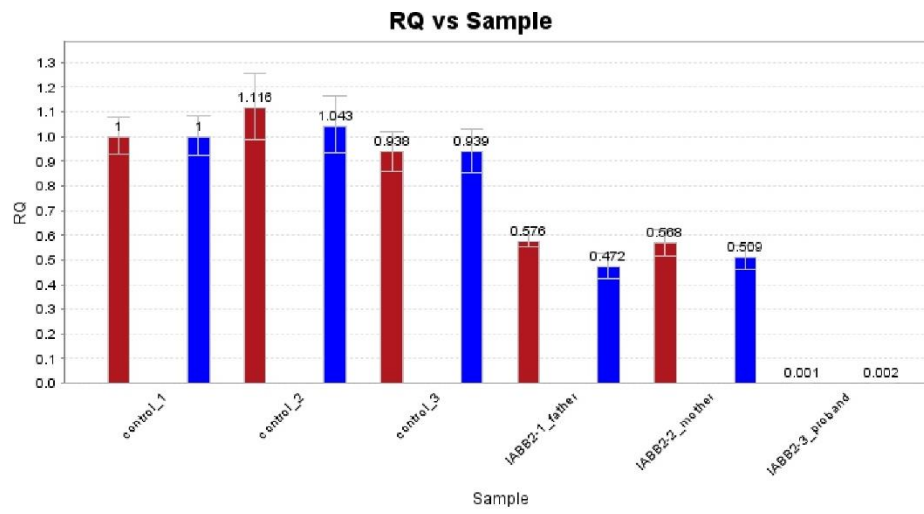

8. IABB14: WDR73

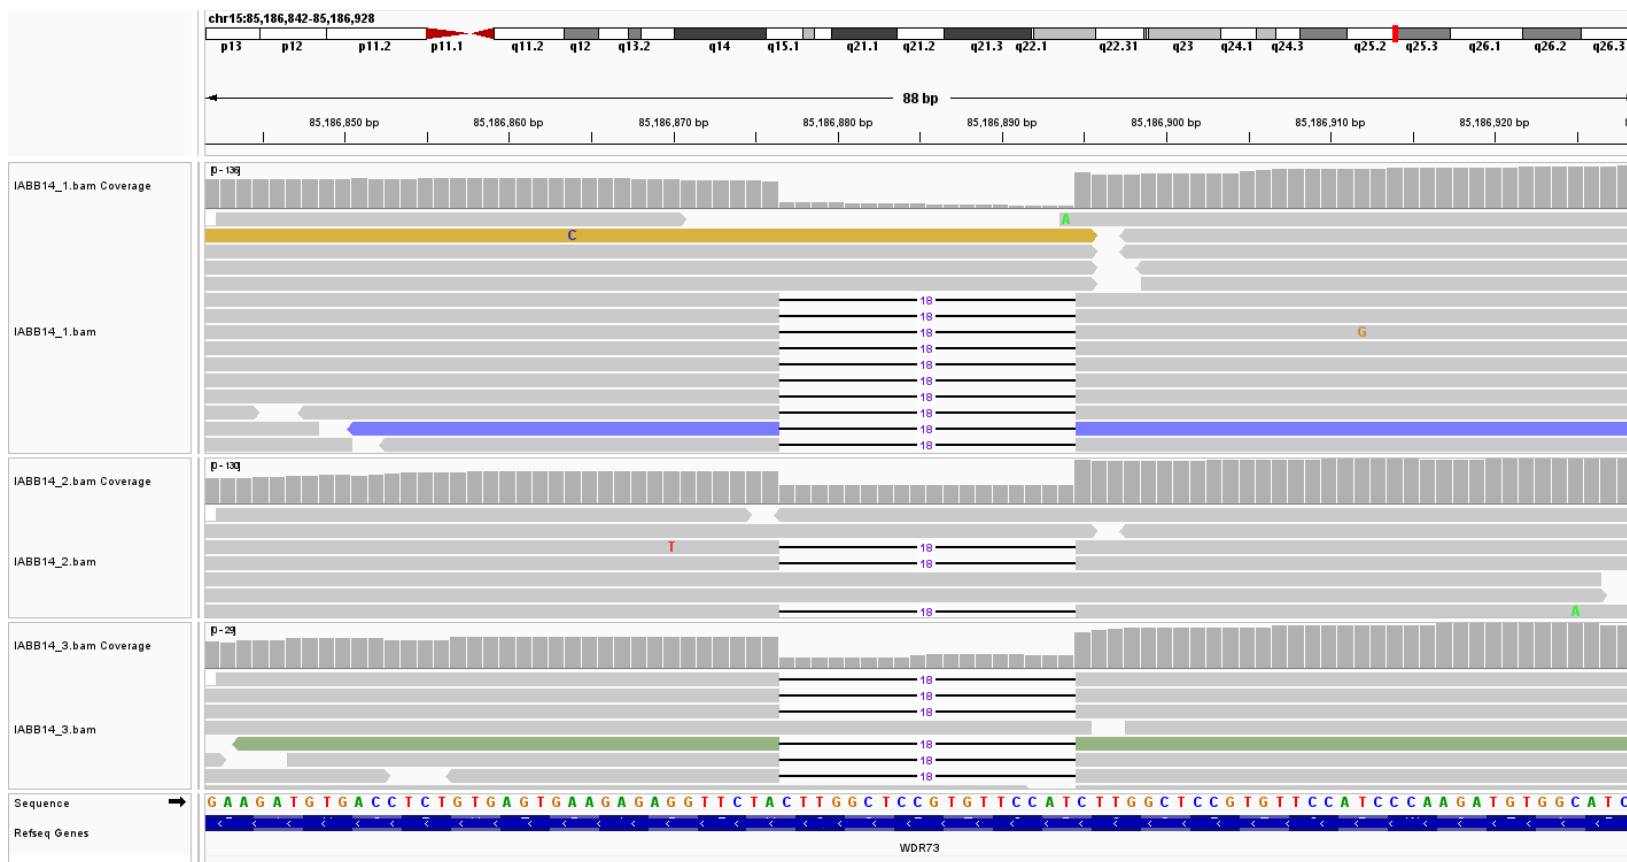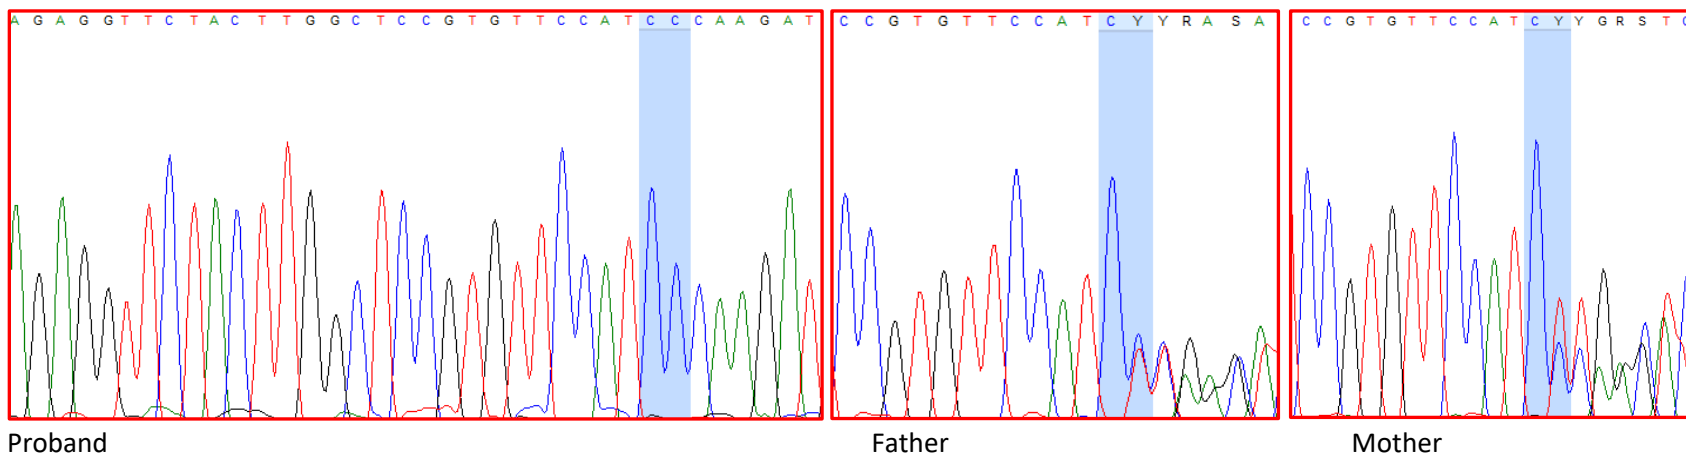

9. IABB14: 19q13.2: *CYP2A7*

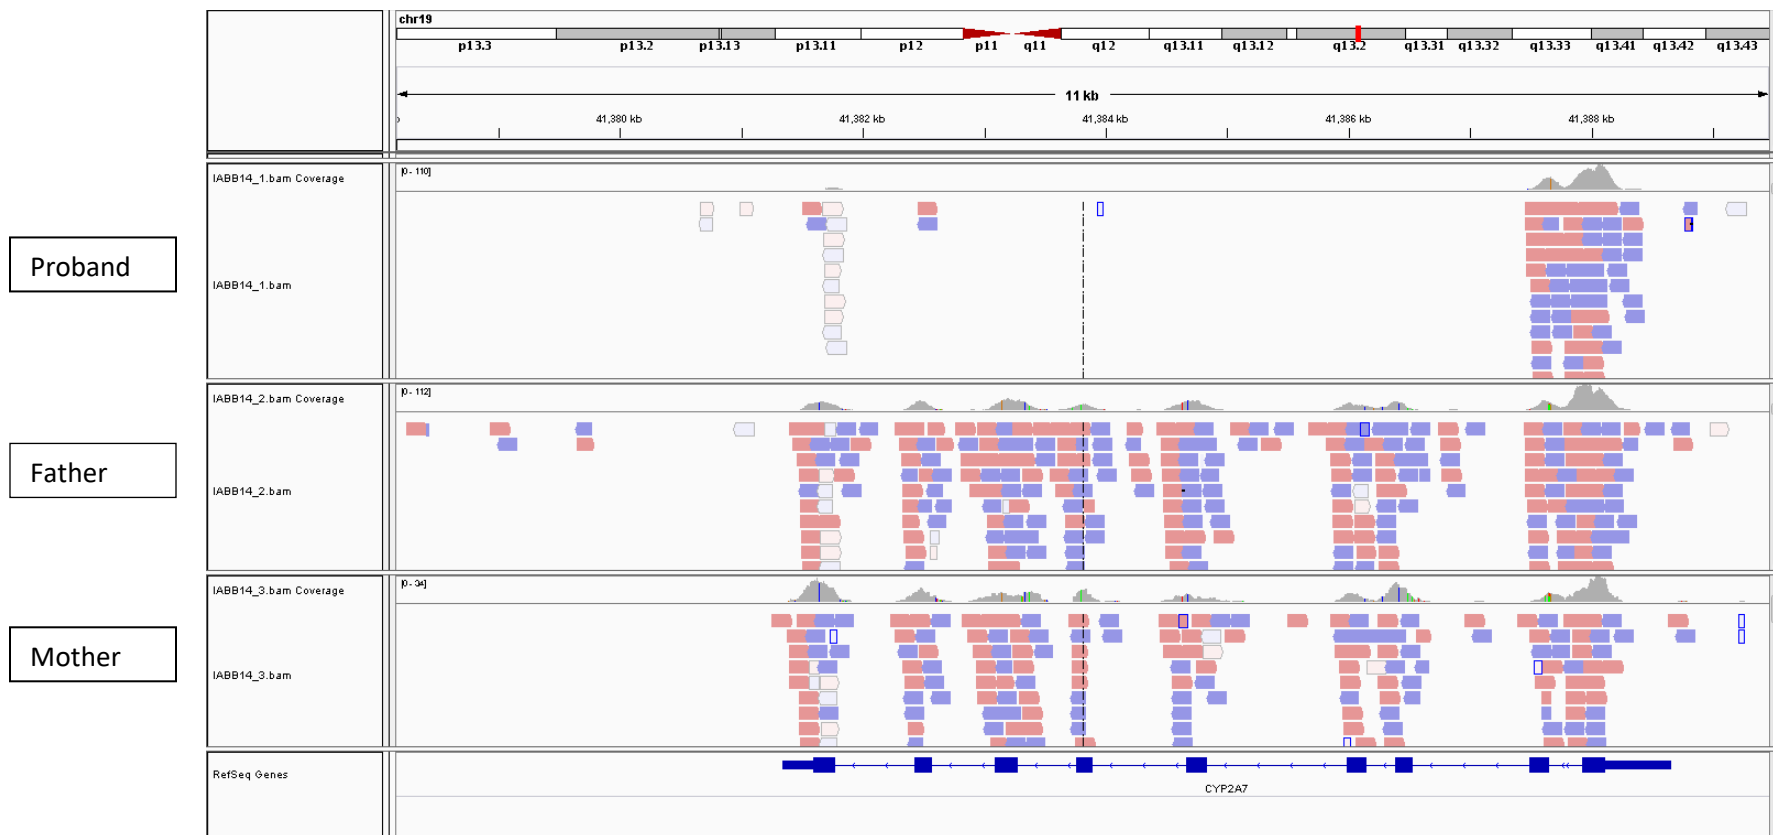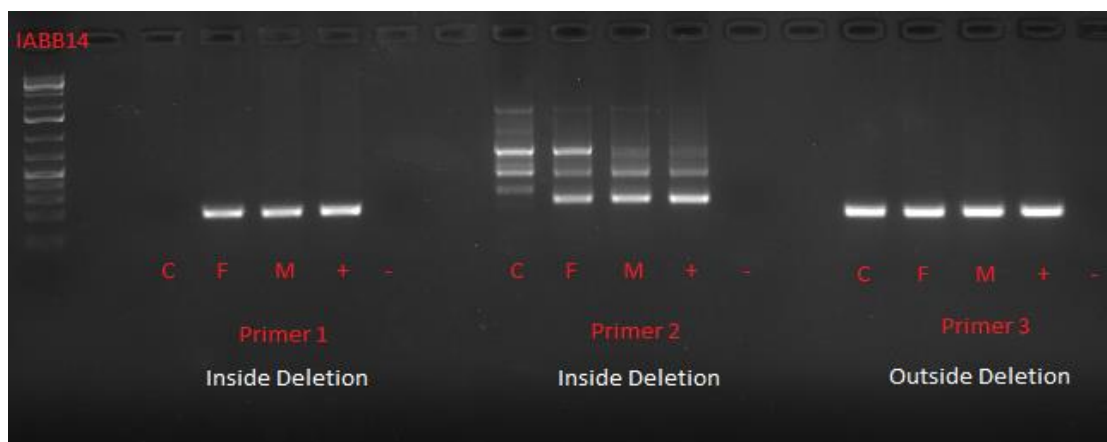

C=child/proband  
F=father  
M=mother  
+=positive control  
-=negative control

Exon 8

Intron 4

Exon 1/Intron 1

10. IABB14: 19q13.33: *KLK15* (validated by PCR and qPCR)

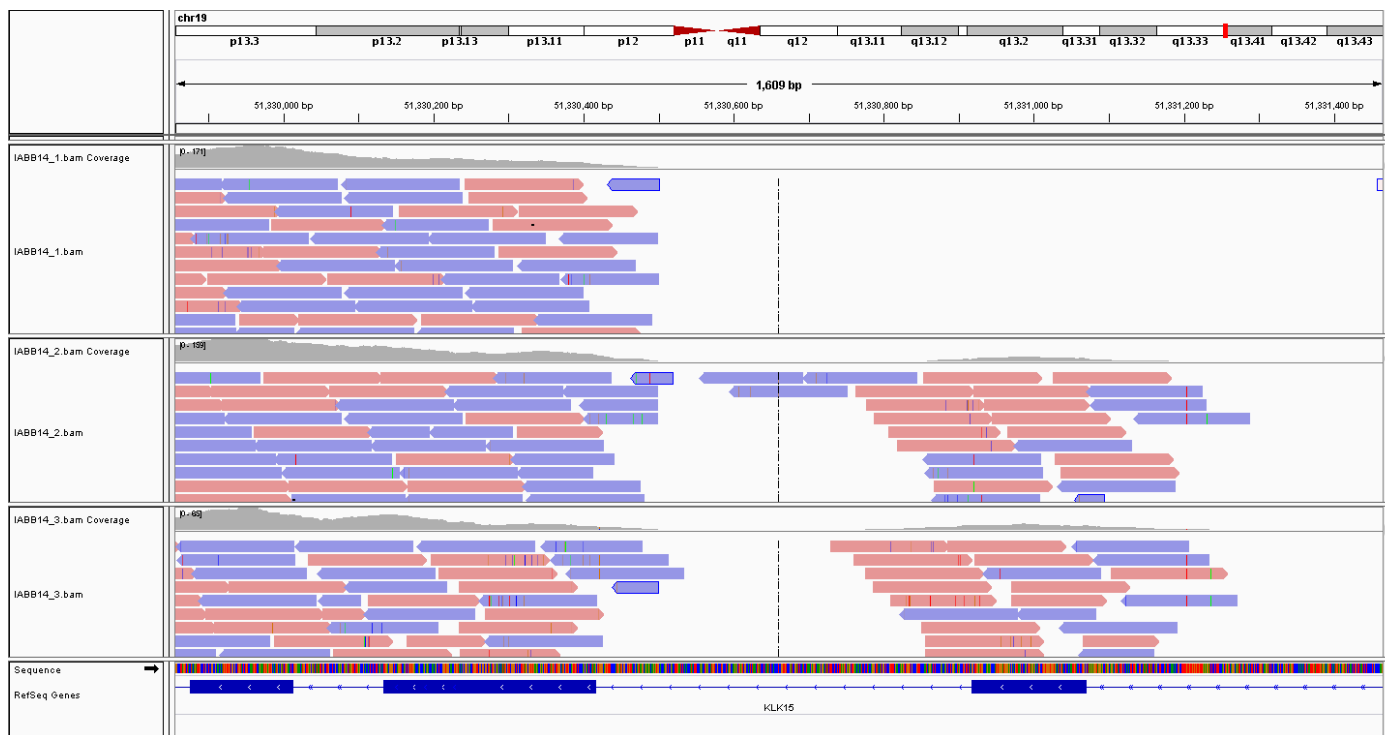

RQ vs Sample

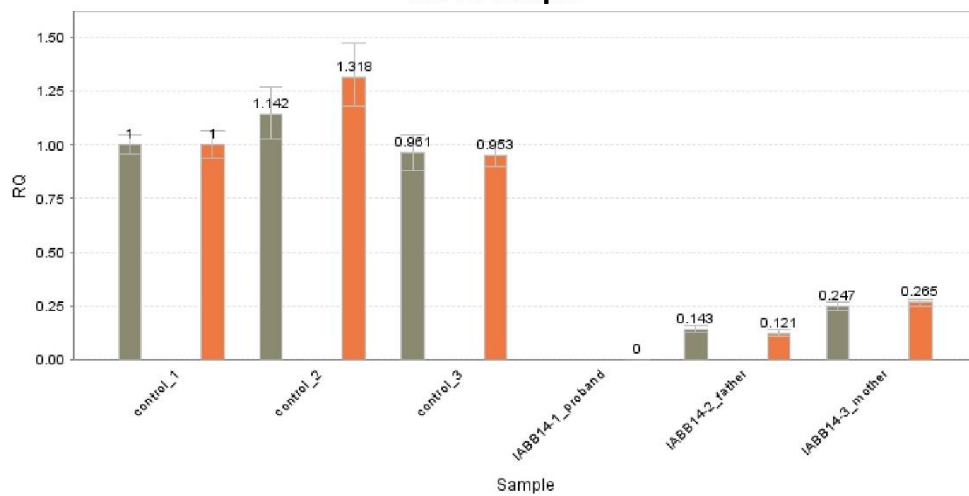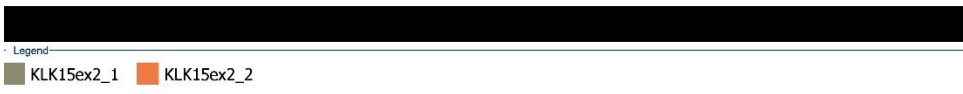

11. SMPA42: Xp11.23: ZNF630/SSX6

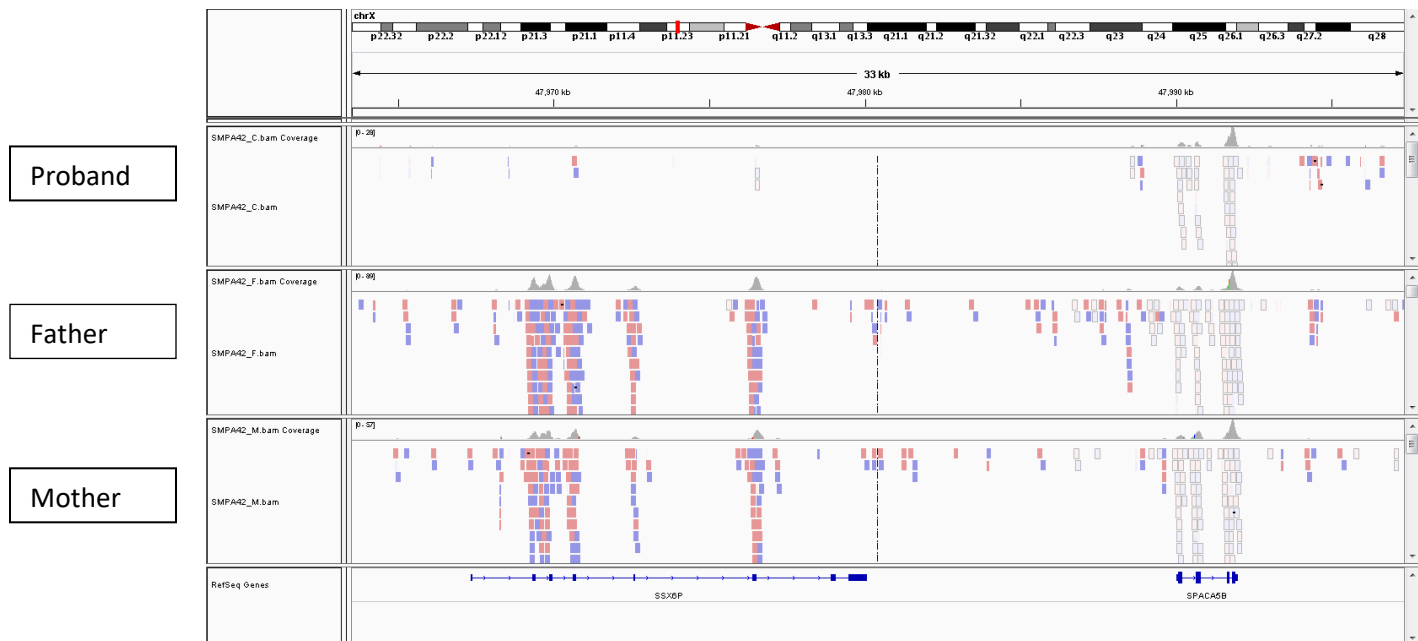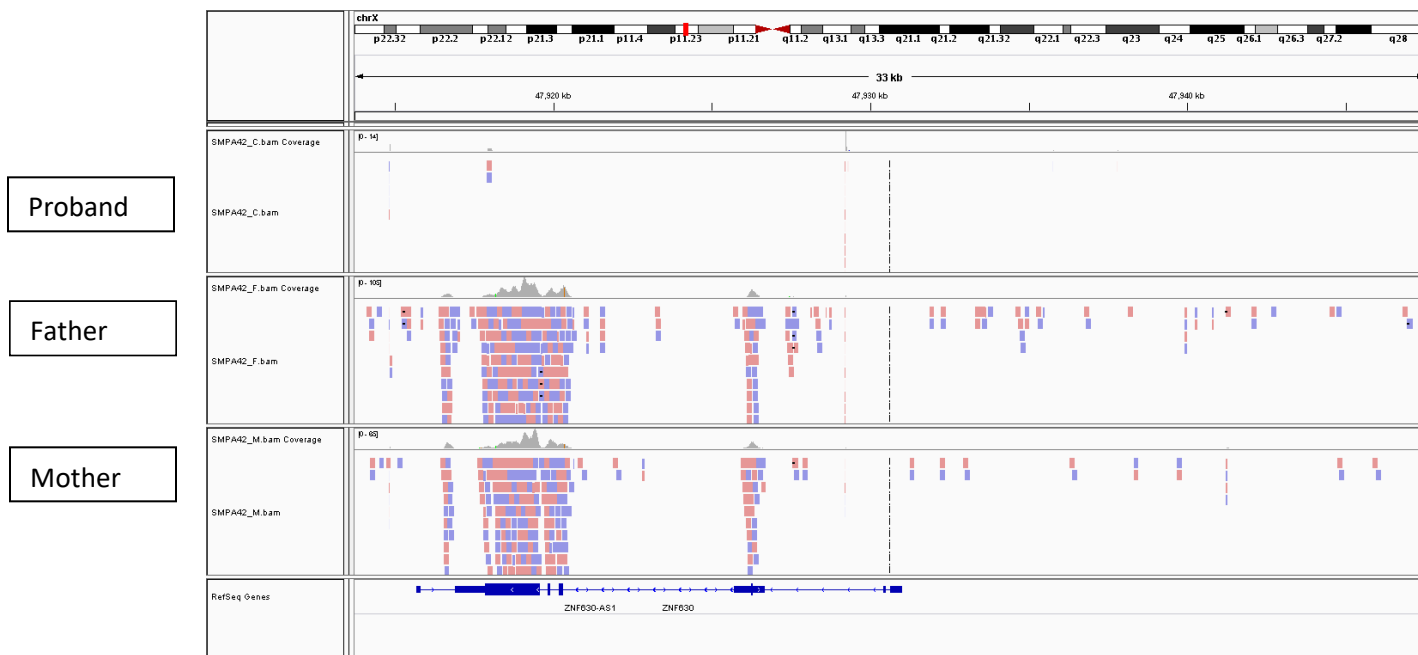

12. SMPA9: Xp11.23: ZNF630/SSX6

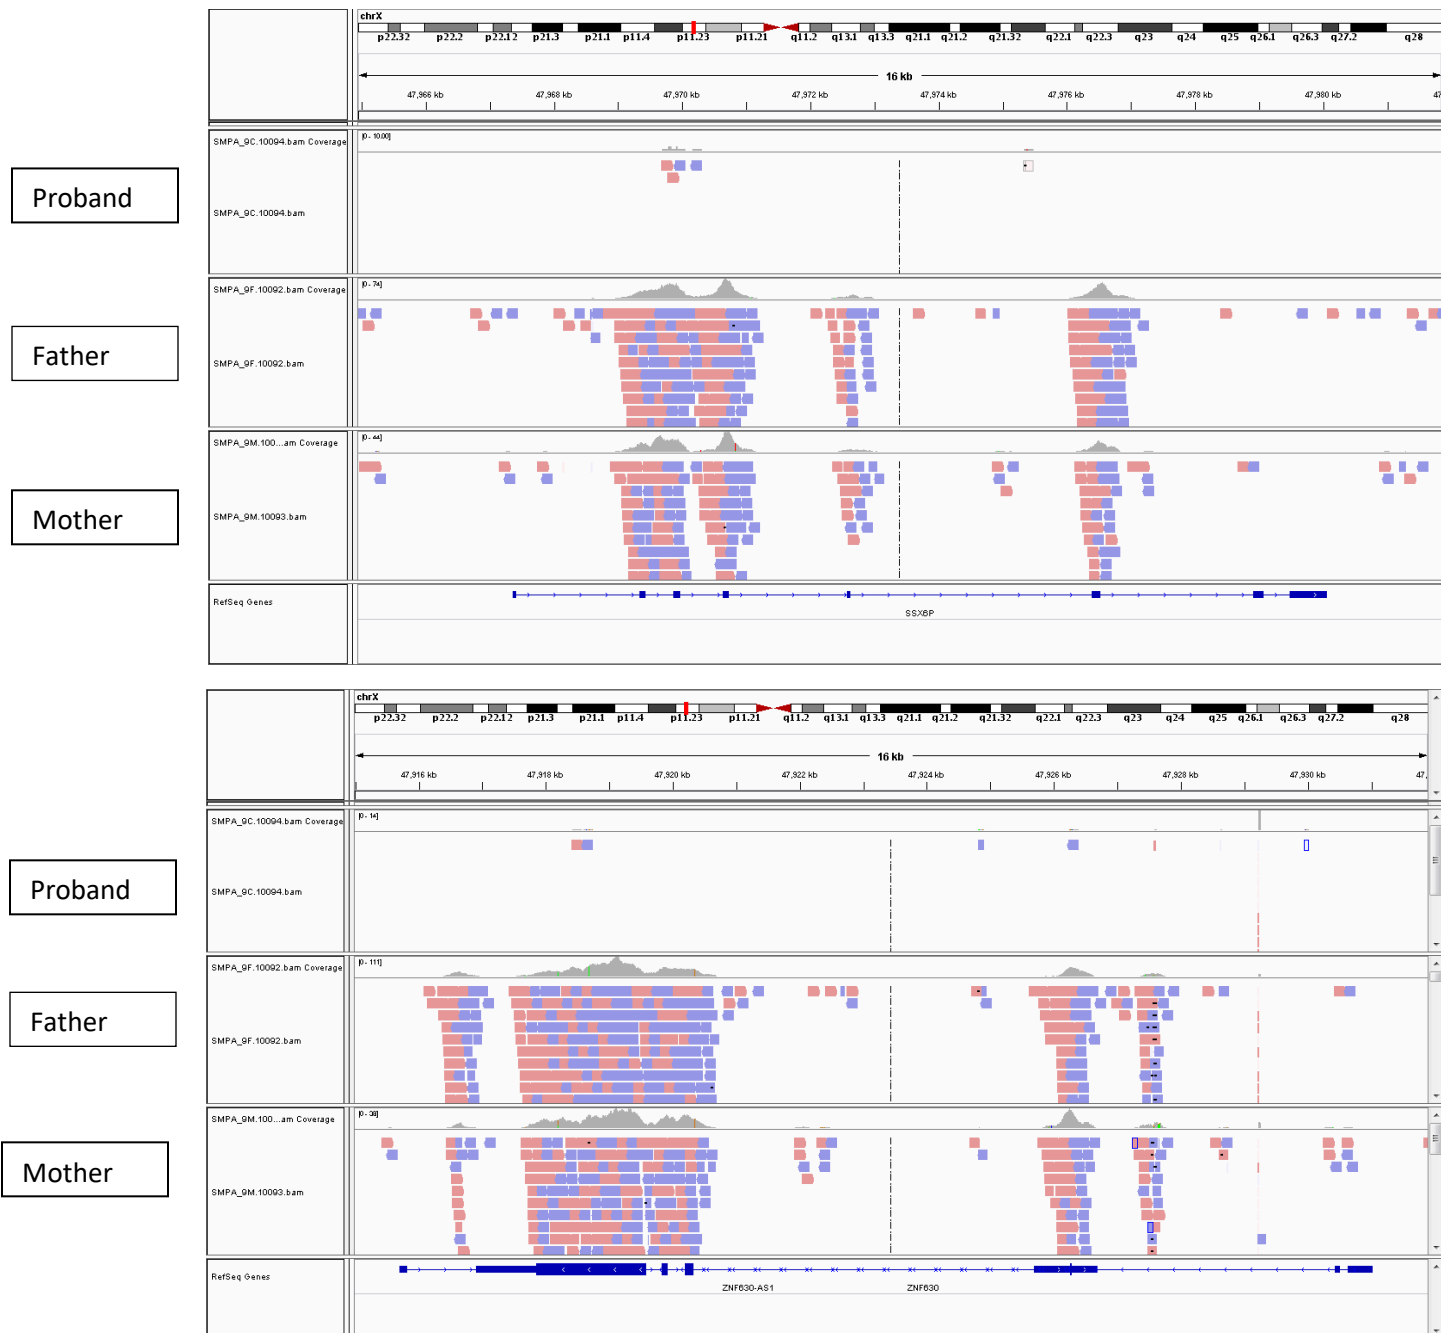

**Table 6: Hemizygous CNVs**

1. SMPA80: Chr9:370,244-13,398,587

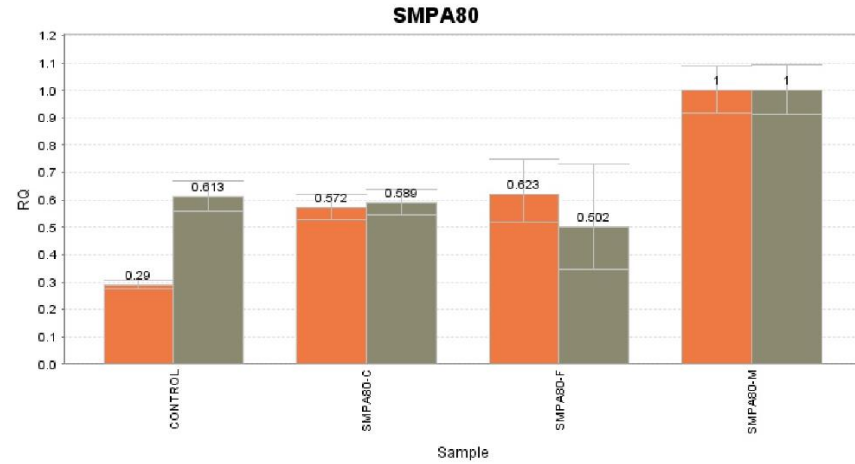

2. IAU25: Chr17:16,778,164-20,364,207

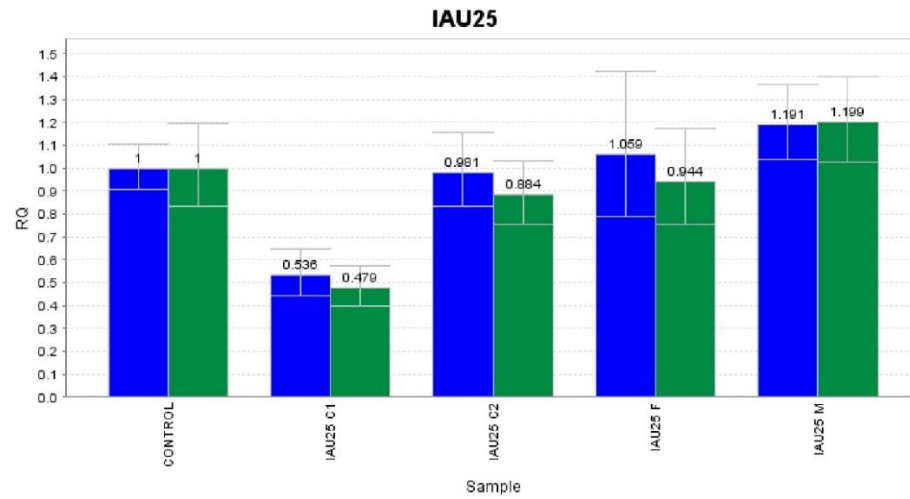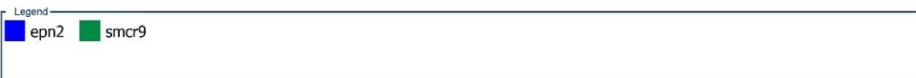



3. IAU74: Chr2:235,370,826-243,034,519

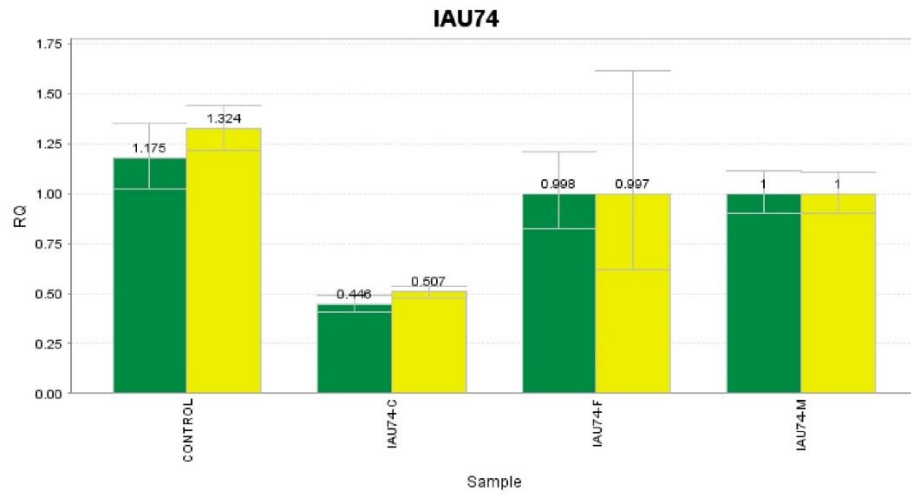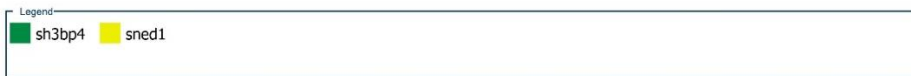

4. IAU7: Chr1:249357-699532

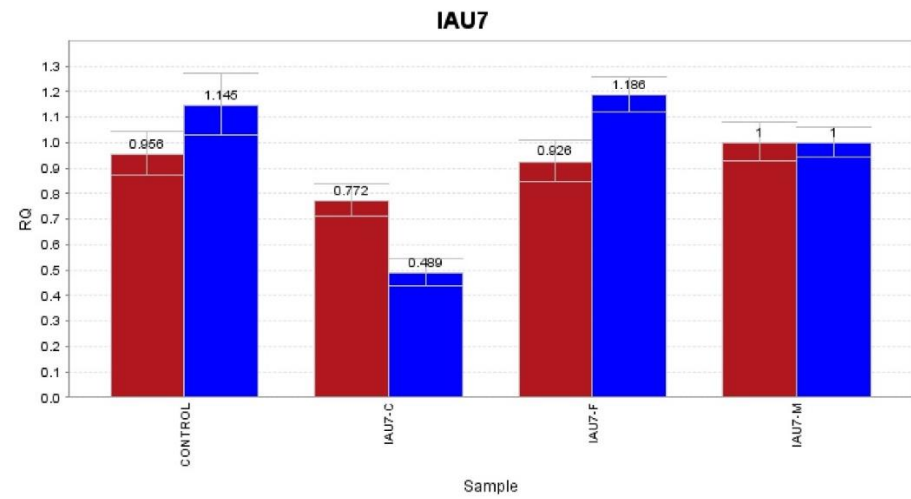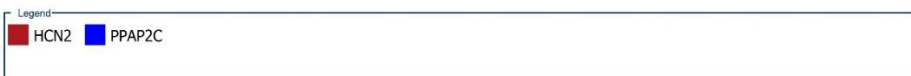

5. SMPA15: Chr15:91,290,633-91,347,451
6. SMPA15: Chr15:40,477,419-41,026,994

### SMPA15

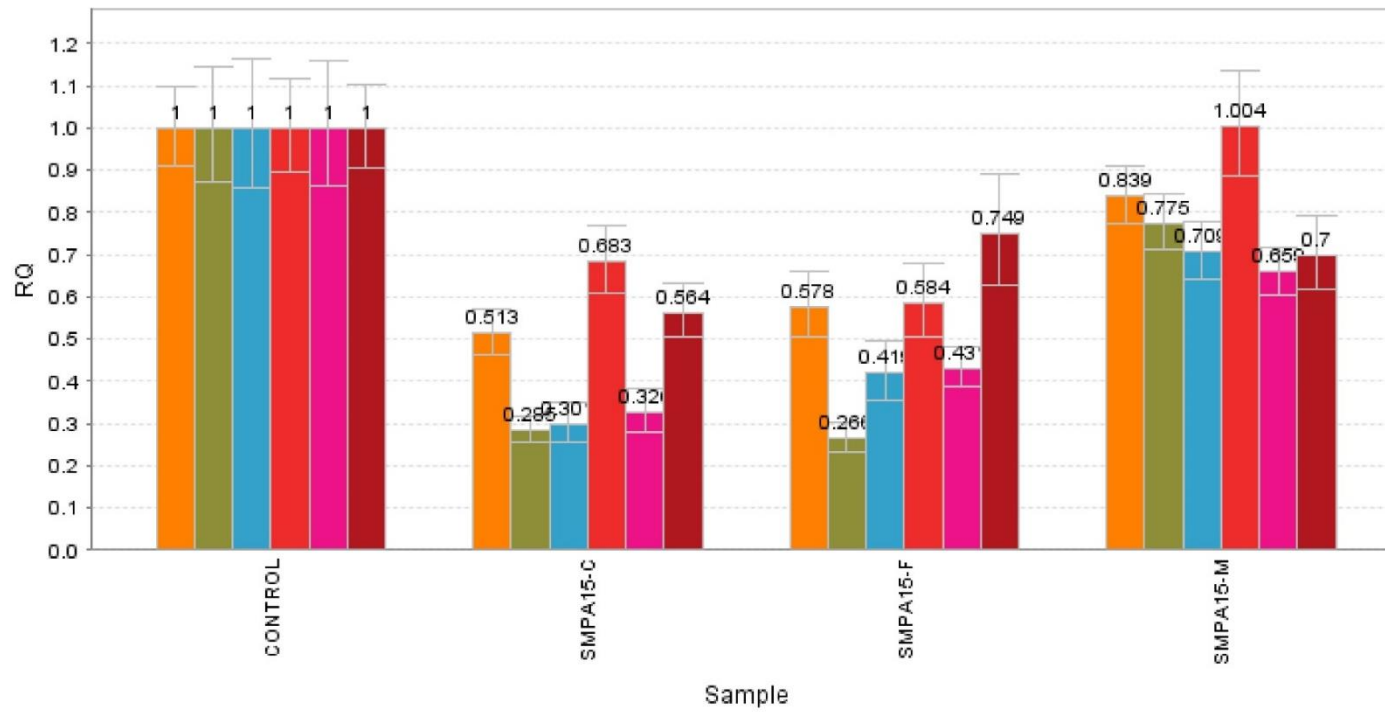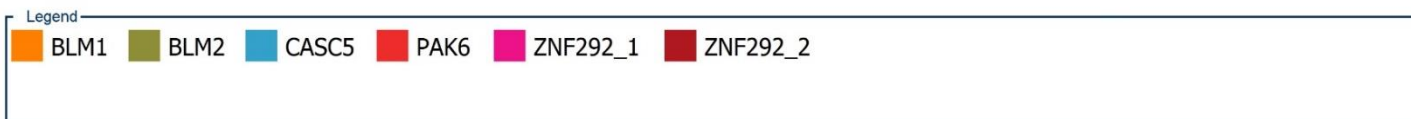

Supplement: Supplementary file [file media-3.pdf]
